# Supplementary material for: Transcriptome profiling of A549 non-small cell lung cancer cells in response to Trichinella spiralis muscle larvae excretory/secretory products
Source: Front Vet Sci. 2023 Jul 31;10:1208538. doi: 10.3389/fvets.2023.1208538 (PMC10433203; doi:10.3389/fvets.2023.1208538)
Supplement: Supplementary file 1 [file Table_1.XLSX]

## Sheet: A3SS
#Alternative Splicing Event: A3SS #Condition pair: test vs control Column A: Track_ID, The ID of the AS event signed by rmats. Column B: Gene_ID, The database name in gene level of the AS event. Column C: Gene_Name, The gene symbol of the AS event. Column D: Chrom, The chromosome of the AS event. Column E: Strand, Strand of the AS event. Column F, G: Long_ES/EE, The start/end Base of long AS exon…
Annotation											DE Statistic							Counts
Track_ID	Gene_ID	Gene_Name	Chrom	Strand	Long_ES	Long_EE	Short_ES	Short_EE	Flanking_ES	Flanking_EE	Diff	p_value	q_value	IncLevel_test	IncLevel_control	IncFormLen	SkipFormLen	IJC_test	SJC_test	IJC_control	SJC_control
A3SS1	ENSG00000129566.12_3	TEP1	chr14	-	20837502	20837735	20837502	20837713	20837832	20837938	0.075	0.0128863	0.113976	1.0,0.897,1.0	0.946,0.839,0.887	171	149	8,10,14	0,1,0	20,18,18	1,3,2
A3SS3	ENSG00000184708.17_3	EIF4ENIF1	chr22	-	31843411	31843554	31843411	31843551	31844138	31844218	-0.08	0.443537	1	0.276,0.269,0.466	0.311,0.528,0.412	152	149	7,3,8	18,8,9	6,8,10	13,7,14
A3SS6	ENSG00000168661.14_2	ZNF30	chr19	+	35424528	35424627	35424531	35424627	35422746	35422897	-0.186	0.0992631	0.475076	0.541,0.269,0.311	0.688,0.495,0.495	152	149	6,3,6	5,8,13	9,4,10	4,4,10
A3SS7	ENSG00000149273.14_3	RPS3	chr11	+	75113347	75113490	75113395	75113490	75112683	75112777	0	1	1	0.0,0.0,0.001	0.0,0.001,0.001	197	149	1,2,4	6055,6256,4815	3,4,7	5975,5920,6782
A3SS8	ENSG00000149273.14_3	RPS3	chr11	+	75115715	75115912	75115803	75115912	75112683	75112777	-0.003	1	1	0.991,0.998,0.992	0.996,0.997,0.996	237	149	2537,2586,2119	15,4,11	2533,2383,2594	6,4,7
A3SS9	ENSG00000149273.14_3	RPS3	chr11	+	75115063	75115251	75115097	75115251	75113395	75113490	0	1	1	0.991,0.993,0.995	0.994,0.993,0.992	183	149	6270,6398,5202	44,39,22	6261,6568,7078	30,39,47
A3SS11	ENSG00000011478.11_2	QPCTL	chr19	+	46198694	46198976	46198890	46198976	46196670	46196814	0.16	1.66043e-06	8.89893e-05	0.976,0.975,1.0	0.706,0.895,0.871	345	149	95,90,47	1,1,0	50,59,78	9,3,5
A3SS12	ENSG00000025423.11_3	HSD17B6	chr12	+	57156981	57157198	57156987	57157198	57146236	57146365	1	1	1	1.0,1.0,NA	0.0,NA,NA	155	149	4,2,0	0,0,0	0,0,0	1,0,0
A3SS15	ENSG00000099385.11_4	BCL7C	chr16	-	30903906	30904068	30903906	30904035	30904532	30904611	0.016	1	1	1.0,1.0,1.0	0.953,1.0,1.0	182	149	35,40,38	0,0,0	25,30,28	1,0,0
A3SS16	ENSG00000167644.11_3	C19orf33	chr19	+	38795204	38795326	38795263	38795326	38795014	38795130	0.005	0.646593	1	0.113,0.092,0.109	0.09,0.102,0.106	208	149	131,92,96	737,652,560	155,154,204	1116,970,1230
A3SS17	ENSG00000164463.12_2	CREBRF	chr5	+	172507587	172507787	172507591	172507787	172483354	172483482	-0.027	0.0716585	0.384047	0.968,0.922,0.898	0.936,0.973,0.961	153	149	126,61,153	4,5,17	105,113,179	7,3,7
A3SS18	ENSG00000155096.13_3	AZIN1	chr8	-	103862226	103862393	103862226	103862372	103870240	103870378	0.009	1	1	0.0,0.027,0.0	0.0,0.0,0.0	170	149	0,2,0	53,63,44	0,0,0	55,41,48
A3SS19	ENSG00000091039.16_3	OSBPL8	chr12	-	76844630	76844768	76844630	76844759	76881289	76881398	-0.121	0.0640706	0.355343	0.531,0.62,0.767	0.724,0.739,0.819	158	149	36,38,42	30,22,12	25,15,24	9,5,5
A3SS22	ENSG00000141527.16_3	CARD14	chr17	+	78164572	78164698	78164640	78164698	78163551	78163671	0.009	1	1	1.0,1.0,1.0	1.0,0.973,1.0	217	149	18,12,19	0,0,0	53,53,35	0,1,0
A3SS23	ENSG00000167543.15_4	TP53I13	chr17	+	27898849	27899075	27898874	27899075	27898608	27898737	0.041	0.0203563	0.160158	0.094,0.079,0.05	0.018,0.046,0.035	174	149	9,5,3	74,50,49	2,5,3	96,89,71
A3SS24	ENSG00000099797.13_3	TECR	chr19	+	14673952	14674069	14673985	14674069	14673336	14673387	-0.151	0.0155002	0.131371	0.034,0.214,0.052	0.224,0.29,0.238	182	149	1,8,1	23,24,15	6,8,8	17,16,21
A3SS25	ENSG00000099797.13_3	TECR	chr19	+	14673952	14674069	14674017	14674069	14673336	14673387	-0.015	0.00746536	0.0782479	0.005,0.021,0.002	0.025,0.029,0.018	214	149	3,13,1	407,419,310	10,11,9	275,257,338
A3SS26	ENSG00000099797.13_3	TECR	chr19	+	14673985	14674069	14674017	14674069	14673336	14673387	-0.009	0.436805	1	0.048,0.054,0.038	0.059,0.057,0.051	181	149	25,29,15	407,419,310	21,19,22	275,257,338
A3SS27	ENSG00000099797.13_3	TECR	chr19	+	14674582	14674715	14674611	14674715	14674469	14674514	-0.011	0.0325403	0.220641	0.005,0.006,0.012	0.012,0.026,0.018	178	149	3,4,6	549,514,425	7,13,10	495,414,461
A3SS28	ENSG00000099797.13_3	TECR	chr19	+	14674582	14674715	14674646	14674715	14674469	14674514	-0.102	0.000411594	0.00887633	0.878,0.768,0.805	0.957,0.855,0.944	213	149	144,137,118	14,29,20	127,126,120	4,15,5
A3SS29	ENSG00000099797.13_3	TECR	chr19	+	14674611	14674715	14674646	14674715	14674469	14674514	-0.022	0.000177927	0.00458628	0.976,0.948,0.956	0.992,0.966,0.989	184	149	690,647,537	14,29,20	615,527,571	4,15,5
A3SS30	ENSG00000143337.18_3	TOR1AIP1	chr1	+	179858444	179858504	179858447	179858504	179853826	179853904	0.019	0.64887	1	0.534,0.593,0.512	0.486,0.582,0.513	152	149	70,64,60	60,43,56	57,54,57	59,38,53
A3SS31	ENSG00000169972.11_2	PUSL1	chr1	+	1245060	1245231	1245085	1245231	1244833	1244983	-0.049	0.00813531	0.0829311	0.929,0.964,0.922	0.982,1.0,0.981	174	149	46,63,55	3,2,4	63,46,59	1,0,1
A3SS35	ENSG00000072163.19_3	LIMS2	chr2	-	128398470	128400647	128398470	128398563	128411997	128412118	-0.342	0.000403396	0.00873975	0.423,1.0,0.552	1.0,1.0,1.0	2233	149	33,23,37	3,0,2	60,50,57	0,0,0
A3SS36	ENSG00000049656.13_2	CLPTM1L	chr5	-	1330394	1330546	1330394	1330498	1331913	1331998	-0.003	1	1	0.003,0.01,0.007	0.008,0.013,0.008	197	149	2,5,3	481,379,325	4,8,5	399,443,470
A3SS37	ENSG00000173113.6_2	TRMT112	chr11	-	64084529	64084619	64084529	64084604	64084735	64084837	-0.002	0.630466	1	0.974,0.977,0.983	0.975,0.98,0.984	164	149	1609,1627,1276	39,35,20	1227,1085,1130	29,20,17
A3SS42	ENSG00000120948.16_4	TARDBP	chr1	+	11083217	11083386	11083249	11083386	11082180	11082307	-0.003	0.801751	1	0.94,0.97,0.943	0.938,0.957,0.966	181	149	151,155,140	8,4,7	129,108,136	7,4,4
A3SS43	ENSG00000120948.16_4	TARDBP	chr1	+	11083217	11083386	11083319	11083386	11082180	11082307	0	0.886824	1	0.937,0.97,0.953	0.958,0.936,0.966	251	149	327,324,308	13,6,9	307,248,285	8,10,6
A3SS44	ENSG00000120948.16_4	TARDBP	chr1	+	11083249	11083386	11083319	11083386	11082180	11082307	-0.002	0.856982	1	0.906,0.951,0.93	0.94,0.907,0.946	219	149	184,173,175	13,6,9	185,144,153	8,10,6
A3SS47	ENSG00000123349.13_3	PFDN5	chr12	+	53690213	53691708	53691633	53691708	53689622	53689725	0.138	0.0036746	0.0461499	0.513,0.48,0.538	0.317,0.369,0.432	1569	149	244,214,245	22,22,20	181,160,208	37,26,26
A3SS48	ENSG00000123349.13_3	PFDN5	chr12	+	53691802	53691934	53691828	53691934	53691633	53691708	0.001	1	1	0.001,0.002,0.004	0.002,0.001,0.001	175	149	2,5,8	2152,2106,1746	7,4,4	2521,2372,2397
A3SS49	ENSG00000160957.12_3	RECQL4	chr8	-	145740319	145740456	145740319	145740426	145740533	145740626	-0.07	1	1	0.956,0.93,0.816	0.946,1.0,0.965	179	149	26,16,16	1,1,3	21,25,33	1,0,1
A3SS50	ENSG00000160957.12_3	RECQL4	chr8	-	145741371	145742148	145741371	145741797	145742433	145742574	0.029	1	1	1.0,1.0,1.0	1.0,0.913,1.0	500	149	83,68,87	0,0,0	88,70,78	0,2,0
A3SS53	ENSG00000101166.15_2	PRELID3B	chr20	-	57612245	57612354	57612245	57612335	57613520	57613689	0.005	1	1	0.009,0.012,0.012	0.008,0.004,0.007	168	149	13,13,13	1304,988,989	12,5,10	1279,1063,1254
A3SS54	ENSG00000116750.13_3	UCHL5	chr1	-	192992055	192992169	192992055	192992166	192992973	192993076	0.06	0.033648	0.225976	0.502,0.472,0.459	0.395,0.426,0.433	152	149	230,134,135	224,147,156	177,163,158	266,215,203
A3SS56	ENSG00000137941.16_3	TTLL7	chr1	-	84372011	84372206	84372011	84372146	84373138	84373344	-0.064	1	1	0.0,0.0,0.0	0.0,0.192,0.0	209	149	0,0,0	14,7,26	0,1,0	6,3,3
A3SS57	ENSG00000137941.16_3	TTLL7	chr1	-	84383286	84383373	84383286	84383369	84385381	84385517	-0.062	0.701656	1	1.0,0.902,0.911	1.0,1.0,1.0	153	149	27,19,21	0,2,2	17,14,11	0,0,0
A3SS61	ENSG00000204351.11_2	SKIV2L	chr6	+	31936399	31936573	31936462	31936573	31936104	31936315	0.047	0.0145894	0.124956	0.081,0.014,0.126	0.028,0.0,0.051	212	149	5,1,9	40,49,44	2,0,3	48,32,39
A3SS62	ENSG00000164253.13_4	WDR41	chr5	-	76747115	76747178	76747115	76747171	76749641	76749753	0.006	1	1	0.991,0.991,1.0	0.981,1.0,0.983	156	149	451,454,364	4,4,0	164,149,122	3,0,2
A3SS63	ENSG00000164253.13_4	WDR41	chr5	-	76749641	76749753	76749641	76749735	76754886	76754949	-0.01	1	1	0.99,0.991,0.99	1.0,1.0,1.0	167	149	562,514,442	5,4,4	187,159,159	0,0,0
A3SS68	ENSG00000139626.15_2	ITGB7	chr12	-	53585106	53585515	53585106	53585420	53585642	53585803	0.109	1	1	0.0,0.132,0.196	0.0,0.0,NA	244	149	0,2,2	13,8,5	0,0,0	2,3,0
A3SS69	ENSG00000105854.12_3	PON2	chr7	-	95035430	95035584	95035430	95035559	95036298	95036380	0.004	1	1	0.011,0.0,0.01	0.003,0.005,0.0	174	149	6,0,5	454,338,406	1,2,0	331,313,339
A3SS70	ENSG00000105854.12_3	PON2	chr7	-	95035430	95035584	95035430	95035559	95039212	95039413	-0.003	0.535303	1	0.109,0.0,0.079	0.135,0.062,0.0	174	149	2,0,2	14,21,20	2,1,0	11,13,11
A3SS71	ENSG00000105854.12_3	PON2	chr7	-	95040964	95041091	95040964	95041055	95041623	95041789	0.011	0.459922	1	0.877,0.797,0.88	0.856,0.856,0.81	185	149	586,376,447	66,77,49	363,397,386	49,54,73
A3SS74	ENSG00000108262.15_3	GIT1	chr17	-	27902305	27902721	27902305	27902488	27902829	27902916	-0.052	0.0436829	0.26996	1.0,0.872,0.972	1.0,1.0,1.0	382	149	109,105,90	0,6,1	132,174,149	0,0,0
A3SS77	ENSG00000282851.1_3	BISPR	chr19	+	17523905	17524114	17524029	17524114	17516885	17517105	-0.026	1	1	0.962,1.0,0.961	1.0,1.0,1.0	273	149	46,37,45	1,0,1	59,60,61	0,0,0
A3SS78	ENSG00000124222.22_3	STX16	chr20	+	57244346	57244509	57244357	57244509	57243042	57243183	0.045	0.0181338	0.148051	1.0,1.0,1.0	0.95,0.914,1.0	160	149	42,19,38	0,0,0	82,57,68	4,5,0
A3SS79	ENSG00000124222.22_3	STX16	chr20	+	57246209	57246353	57246219	57246353	57245567	57245659	-0.009	1	1	0.995,0.986,0.986	1.0,1.0,0.995	159	149	211,147,294	1,2,4	221,174,207	0,0,1
A3SS80	ENSG00000166233.14_3	ARIH1	chr15	+	72862504	72862648	72862517	72862648	72859446	72859518	0.012	1	1	0.007,0.009,0.019	0.0,0.0,0.0	162	149	1,1,3	130,106,146	0,0,0	115,108,121
A3SS83	ENSG00000059122.16_2	FLYWCH1	chr16	+	2980410	2980881	2980413	2980881	2979613	2980011	0.031	0.656493	1	0.715,0.758,0.643	0.583,0.731,0.71	152	149	69,67,46	27,21,25	20,25,20	14,9,8
A3SS84	ENSG00000206503.12_2	HLA-A	chr6	+	29912276	29912868	29912835	29912868	29911898	29912174	-0.063	2.52076e-12	5.24803e-10	0.926,0.919,0.94	0.992,0.995,0.988	708	149	1906,1515,1499	32,28,20	1127,931,1138	2,1,3
A3SS85	ENSG00000206503.12_2	HLA-A	chr6	+	29912276	29912868	29912839	29912868	29911898	29912174	-0.001	1	1	1.0,0.997,1.0	1.0,1.0,1.0	712	149	1973,1587,1552	0,1,0	1184,990,1180	0,0,0
A3SS86	ENSG00000206503.12_2	HLA-A	chr6	+	29912835	29912868	29912839	29912868	29911898	29912174	-0.003	1	1	1.0,0.99,1.0	1.0,1.0,1.0	153	149	99,100,73	0,1,0	59,60,45	0,0,0
A3SS87	ENSG00000206503.12_2	HLA-A	chr6	+	29912835	29912868	29912839	29912868	29912276	29912393	-0.002	1	1	0.994,0.997,0.997	0.998,0.997,0.998	153	149	2172,1932,1807	13,6,5	1443,1174,1224	3,4,2
A3SS88	ENSG00000104529.17_4	EEF1D	chr8	-	144661897	144662000	144661897	144661994	144662181	144662376	-0.001	1	1	1.0,0.998,0.996	1.0,0.999,0.999	155	149	621,592,527	0,1,2	855,831,737	0,1,1
A3SS89	ENSG00000104529.17_4	EEF1D	chr8	-	144662675	144662897	144662675	144662802	144663223	144663324	0.004	0.262537	0.873455	0.986,0.989,0.969	0.977,0.971,0.984	244	149	1530,1432,1427	13,10,28	2465,2203,2354	36,40,23
A3SS90	ENSG00000104529.17_4	EEF1D	chr8	-	144663455	144663876	144663455	144663498	144668388	144668460	0.002	1	1	0.003,0.001,0.008	0.001,0.002,0.002	527	149	7,3,18	701,695,619	2,5,5	760,824,883
A3SS91	ENSG00000104529.17_4	EEF1D	chr8	-	144672777	144672908	144672777	144672905	144674816	144675063	0.101	1	1	NA,1.0,NA	0.797,1.0,NA	152	149	0,1,0	0,0,0	4,1,0	1,0,0
A3SS92	ENSG00000104529.17_4	EEF1D	chr8	-	144668898	144669022	144668898	144669019	144676044	144676241	0.5	1	1	NA,1.0,1.0	NA,1.0,0.0	152	149	0,1,2	0,0,0	0,4,0	0,0,2
A3SS93	ENSG00000104529.17_4	EEF1D	chr8	-	144668898	144669022	144668898	144669019	144676062	144676241	0.101	1	1	0.0,NA,1.0	0.0,0.797,NA	152	149	0,0,2	1,0,0	0,4,0	3,1,0
A3SS96	ENSG00000104529.17_4	EEF1D	chr8	-	144672777	144672908	144672777	144672905	144679517	144679585	0.074	0.0546732	0.314836	0.495,1.0,1.0	0.329,1.0,0.943	152	149	1,2,4	1,0,0	2,2,17	4,0,1
A3SS99	ENSG00000104529.17_4	EEF1D	chr8	-	144674816	144675112	144674816	144675063	144679517	144679585	-0.183	0.143973	0.602728	1.0,0.601,0.601	0.751,1.0,1.0	198	149	6,4,4	0,2,2	8,7,6	2,0,0
A3SS100	ENSG00000232677.6_2	LINC00665	chr19	-	36813031	36813286	36813031	36813127	36821154	36821394	-0.122	1	1	0.0,0.0,NA	0.0,NA,0.244	308	149	0,0,0	5,2,0	0,0,2	3,0,3
A3SS102	ENSG00000125835.18_3	SNRPB	chr20	-	2442279	2442585	2442279	2442439	2443281	2443407	0.06	0.0102595	0.0977724	0.442,0.443,0.431	0.394,0.353,0.388	295	149	695,798,644	444,507,430	460,431,496	357,399,395
A3SS103	ENSG00000072571.19_3	HMMR	chr5	+	162894706	162894754	162894709	162894754	162891728	162891808	-0.061	0.839804	1	0.911,1.0,0.907	1.0,1.0,1.0	152	149	21,11,20	2,0,2	37,40,34	0,0,0
A3SS106	ENSG00000110074.10_2	FOXRED1	chr11	+	126143210	126143349	126143230	126143349	126142863	126142974	-0.006	0.675539	1	0.013,0.018,0.0	0.0,0.049,0.0	169	149	1,1,0	69,48,49	0,4,0	47,69,56
A3SS107	ENSG00000110074.10_2	FOXRED1	chr11	+	126143210	126143349	126143233	126143349	126142863	126142974	0.232	1	1	1.0,0.464,NA	NA,1.0,0.0	172	149	1,1,0	0,1,0	0,4,0	0,0,1
A3SS108	ENSG00000110074.10_2	FOXRED1	chr11	+	126143230	126143349	126143233	126143349	126142863	126142974	-0.001	1	1	1.0,0.979,1.0	1.0,1.0,0.982	152	149	69,48,49	0,1,0	47,69,56	0,0,1
A3SS109	ENSG00000110074.10_2	FOXRED1	chr11	+	126144821	126144916	126144825	126144916	126143230	126143349	-0.02	0.133787	0.573366	1.0,0.966,0.92	0.982,0.975,0.988	153	149	54,58,59	0,2,5	57,81,84	1,2,1
A3SS110	ENSG00000110074.10_2	FOXRED1	chr11	+	126146892	126147070	126146965	126147070	126146288	126146418	0.002	1	1	0.0,0.009,0.018	0.02,0.0,0.0	222	149	0,1,2	85,71,75	3,0,0	101,67,84
A3SS111	ENSG00000146826.16_3	C7orf43	chr7	-	99753293	99753542	99753293	99753448	99754008	99754172	-0.066	0.363308	1	0.081,0.088,0.187	0.17,0.17,0.214	243	149	3,3,6	21,19,16	5,2,4	15,6,9
A3SS114	ENSG00000058272.16_3	PPP1R12A	chr12	-	80172329	80173131	80172329	80172380	80175594	80175642	-0.001	1	1	0.002,0.0,0.002	0.004,0.001,0.002	900	149	5,0,3	349,234,250	6,1,2	267,180,189
A3SS115	ENSG00000058272.16_3	PPP1R12A	chr12	-	80199945	80200113	80199945	80200077	80201005	80201110	0.001	0.783317	1	0.923,0.987,0.976	0.967,0.961,0.954	185	149	163,91,149	11,1,3	110,92,130	3,3,5
A3SS117	ENSG00000104299.14_3	INTS9	chr8	-	28628498	28628682	28628498	28628597	28633275	28633443	0.152	1.08162e-05	0.000440401	0.032,0.271,0.197	0.021,0.0,0.024	234	149	1,7,5	19,12,13	1,0,1	30,28,26
A3SS119	ENSG00000115084.13_2	SLC35F5	chr2	-	114476730	114476885	114476730	114476857	114480680	114480771	0	1	1	0.993,1.0,1.0	0.993,1.0,1.0	177	149	178,147,139	1,0,0	168,160,146	1,0,0
A3SS120	ENSG00000198920.9_3	KIAA0753	chr17	-	6493829	6493950	6493829	6493898	6498291	6498373	0.024	0.214223	0.774092	0.942,0.887,0.979	0.862,0.979,0.895	201	149	44,53,62	2,5,1	76,62,69	9,1,6
A3SS121	ENSG00000026025.15_3	VIM	chr10	+	17277844	17278378	17278292	17278378	17277167	17277388	0	1	1	1.0,1.0,0.993	1.0,1.0,0.992	597	149	2254,2080,1753	0,0,3	3048,2613,3132	0,0,6
A3SS132	ENSG00000260238.6_3	PMF1-BGLAP	chr1	+	156206078	156206274	156206139	156206274	156203418	156203519	-0.003	1	1	0.989,1.0,0.995	0.996,1.0,0.996	210	149	388,373,298	3,0,1	338,335,342	1,0,1
A3SS136	ENSG00000143845.14_3	ETNK2	chr1	-	204103642	204103822	204103642	204103716	204106231	204106377	-0.054	0.389038	1	0.068,0.068,0.02	0.319,0.0,0.0	255	149	4,5,1	32,40,29	8,0,0	10,10,7
A3SS137	ENSG00000163781.12_3	TOPBP1	chr3	-	133371306	133371473	133371306	133371458	133372188	133372368	-0.029	0.580134	1	0.578,0.476,0.472	0.61,0.499,0.503	164	149	86,47,57	57,47,58	110,68,88	64,62,79
A3SS138	ENSG00000065883.14_2	CDK13	chr7	+	40132383	40132836	40132563	40132836	40127724	40127930	-0.131	3.53209e-06	0.000172245	0.102,0.072,0.041	0.212,0.255,0.14	329	149	22,12,5	88,70,53	28,31,18	47,41,50
A3SS140	ENSG00000006282.20_3	SPATA20	chr17	+	48627345	48627673	48627568	48627673	48626403	48626547	-0.224	1	1	0.783,0.546,1.0	NA,1.0,1.0	372	149	9,3,7	1,1,0	0,1,4	0,0,0
A3SS143	ENSG00000172661.17_2	WASHC2C	chr10	+	46264896	46265066	46264902	46265066	46261126	46261258	-0.009	0.733333	1	0.936,0.976,0.935	0.954,0.985,0.935	155	149	76,42,60	5,1,4	86,70,90	4,1,6
A3SS145	ENSG00000060656.19_2	PTPRU	chr1	+	29650142	29650300	29650148	29650300	29649882	29650008	-0.056	0.0426008	0.265055	0.894,0.94,0.858	0.933,0.947,0.981	155	149	35,49,44	4,3,7	58,37,54	4,2,1
A3SS146	ENSG00000172771.11_2	EFCAB12	chr3	-	129121365	129123246	129121365	129121422	129127487	129127701	-0.651	1	1	0.117,NA,0.201	0.43,1.0,1.0	1973	149	7,0,10	4,0,3	10,3,4	1,0,0
A3SS147	ENSG00000171097.13_3	KYAT1	chr9	-	131598275	131598384	131598275	131598352	131599080	131599201	-0.003	0.663926	1	0.121,0.0,0.162	0.121,0.078,0.093	181	149	4,0,4	24,8,17	5,3,2	30,29,16
A3SS148	ENSG00000171097.13_3	KYAT1	chr9	-	131607631	131607796	131607631	131607690	131608958	131609138	-0.045	1	1	0.043,0.0,0.0	0.0,0.089,0.089	255	149	1,0,0	13,10,7	0,1,1	9,6,6
A3SS149	ENSG00000173992.8_2	CCS	chr11	+	66372624	66372887	66372809	66372887	66367959	66368020	-0.016	0.208344	0.758975	0.086,0.042,0.052	0.085,0.07,0.073	334	149	20,8,13	95,81,106	34,23,25	163,137,142
A3SS150	ENSG00000145740.18_3	SLC30A5	chr5	+	68417520	68417722	68417573	68417722	68414325	68414455	0.004	1	1	1.0,1.0,1.0	1.0,0.987,1.0	202	149	133,82,99	0,0,0	86,105,124	0,1,0
A3SS152	ENSG00000076984.17_2	MAP2K7	chr19	+	7976299	7976463	7976320	7976463	7976134	7976215	-0.01	0.788761	1	0.034,0.012,0.064	0.099,0.015,0.025	170	149	3,1,4	75,74,51	3,1,2	24,56,69
A3SS154	ENSG00000237765.6_3	FAM200B	chr4	+	15688554	15688768	15688623	15688768	15687858	15688085	-0.008	0.687521	1	0.181,0.081,0.109	0.183,0.12,0.091	218	149	10,4,5	31,31,28	18,9,7	55,45,48
A3SS155	ENSG00000104774.12_3	MAN2B1	chr19	-	12763176	12763274	12763176	12763243	12766507	12766693	-0.009	1	1	1.0,1.0,0.95	0.978,1.0,1.0	180	149	58,41,46	0,0,2	53,59,70	1,0,0
A3SS159	ENSG00000268350.7_3	FAM156A	chrX	-	52984351	52984444	52984351	52984441	52985470	52985544	-0.028	1	1	0.915,1.0,1.0	1.0,1.0,1.0	152	149	11,11,16	1,0,0	24,24,10	0,0,0
A3SS160	ENSG00000268350.7_3	FAM156A	chrX	-	52985470	52985953	52985470	52985544	52986285	52986436	0.17	0.182801	0.701775	1.0,1.0,0.263	1.0,0.445,0.308	558	149	5,1,4	0,0,3	13,3,5	0,1,3
A3SS161	ENSG00000007392.16_3	LUC7L	chr16	-	238967	240134	238967	239338	240539	240569	0.044	0.814002	1	1.0,1.0,1.0	0.869,1.0,1.0	945	149	194,205,191	0,0,0	126,157,126	3,0,0
A3SS162	ENSG00000100711.13_2	ZFYVE21	chr14	+	104193895	104194251	104194082	104194251	104193128	104193179	0.088	7.24896e-06	0.000313655	0.138,0.092,0.092	0.035,0.0,0.023	336	149	9,8,5	25,35,22	3,0,2	37,46,38
A3SS163	ENSG00000103024.7_3	NME3	chr16	-	1821070	1821192	1821070	1821172	1821280	1821411	0.037	0.0418445	0.261552	0.051,0.032,0.096	0.0,0.04,0.028	169	149	4,3,6	65,79,50	0,3,2	43,63,61
A3SS167	ENSG00000157657.14_3	ZNF618	chr9	+	116791012	116791252	116791189	116791252	116778974	116779064	-0.141	1	1	1.0,1.0,0.578	1.0,1.0,1.0	326	149	2,1,3	0,0,1	3,5,3	0,0,0
A3SS168	ENSG00000157657.14_3	ZNF618	chr9	+	116794924	116795008	116794927	116795008	116791012	116791252	0.167	1	1	1.0,NA,0.0	1.0,0.0,0.0	152	149	1,0,0	0,0,1	1,0,0	0,1,8
A3SS169	ENSG00000142453.11_3	CARM1	chr19	+	11030508	11030642	11030552	11030642	11030270	11030356	-0.006	1	1	0.0,0.0,0.0	0.018,0.0,0.0	193	149	0,0,0	100,64,58	2,0,0	82,64,100
A3SS170	ENSG00000225697.12_3	SLC26A6	chr3	-	48664308	48664488	48664308	48664485	48665378	48665471	-0.008	0.937746	1	0.468,0.43,0.437	0.567,0.356,0.435	152	149	44,40,38	49,52,48	44,31,44	33,55,56
A3SS172	ENSG00000225697.12_3	SLC26A6	chr3	-	48669081	48669234	48669081	48669230	48669312	48669477	-0.032	0.459031	1	0.868,0.694,0.796	0.801,0.778,0.876	153	149	27,28,32	4,12,8	29,18,29	7,5,4
A3SS173	ENSG00000225697.12_3	SLC26A6	chr3	-	48669677	48669829	48669677	48669770	48670406	48670517	0.006	1	1	0.969,1.0,1.0	1.0,1.0,0.951	208	149	44,34,48	1,0,0	23,29,27	0,0,1
A3SS174	ENSG00000225697.12_3	SLC26A6	chr3	-	48670406	48670558	48670406	48670517	48670683	48670823	-0.007	0.490637	1	0.0,0.0,0.107	0.071,0.03,0.027	190	149	0,0,7	47,33,46	3,1,1	31,25,28
A3SS176	ENSG00000113407.13_3	TARS	chr5	+	33446712	33446870	33446749	33446870	33445429	33445510	0	1	1	0.616,1.0,1.0	1.0,0.616,1.0	186	149	2,1,1	1,0,0	2,2,1	0,1,0
A3SS177	ENSG00000113407.13_3	TARS	chr5	+	33453393	33453517	33453398	33453517	33448646	33448837	0.002	1	1	0.996,0.999,0.997	0.993,0.996,0.997	154	149	2037,1598,1536	7,1,4	1820,1840,2088	13,7,6
A3SS178	ENSG00000113407.13_3	TARS	chr5	+	33455049	33455171	33455086	33455171	33448646	33448837	-0.001	1	1	0.998,0.997,0.997	0.995,1.0,1.0	186	149	542,360,383	1,1,1	539,482,601	2,0,0
A3SS179	ENSG00000092445.11_3	TYRO3	chr15	+	41865199	41865309	41865214	41865309	41864640	41864762	0.014	1	1	1.0,1.0,1.0	0.987,0.984,0.987	164	149	119,71,75	0,0,0	84,69,81	1,1,1
A3SS180	ENSG00000197070.13_3	ARRDC1	chr9	+	140507864	140507962	140507874	140507962	140507347	140507458	0.059	1	1	1.0,1.0,1.0	1.0,0.824,1.0	159	149	1,1,2	0,0,0	3,5,3	0,1,0
A3SS181	ENSG00000197070.13_3	ARRDC1	chr9	+	140507864	140507962	140507911	140507962	140507347	140507458	-0.016	0.638531	1	0.078,0.057,0.173	0.08,0.124,0.153	196	149	3,2,8	27,25,29	7,8,10	61,43,42
A3SS182	ENSG00000197070.13_3	ARRDC1	chr9	+	140507874	140507962	140507911	140507962	140507347	140507458	-0.003	0.924978	1	0.056,0.031,0.142	0.05,0.069,0.118	186	149	2,1,6	27,25,29	4,4,7	61,43,42
A3SS183	ENSG00000197070.13_3	ARRDC1	chr9	+	140508483	140508666	140508591	140508666	140508066	140508221	-0.002	0.753504	1	0.959,1.0,0.97	1.0,0.944,0.99	257	149	120,67,110	3,0,2	128,116,168	0,4,1
A3SS184	ENSG00000113716.12_3	HMGXB3	chr5	+	149403824	149404243	149404067	149404243	149398128	149398260	0.015	1	1	1.0,1.0,1.0	1.0,1.0,0.954	392	149	120,107,78	0,0,0	63,56,55	0,0,1
A3SS185	ENSG00000169855.19_2	ROBO1	chr3	-	78684922	78685258	78684922	78685093	78688893	78689048	0.054	0.435998	1	0.865,0.71,0.907	0.655,0.792,0.874	314	149	54,31,41	4,6,2	28,32,44	7,4,3
A3SS187	ENSG00000142949.16_2	PTPRF	chr1	+	44085765	44086250	44086124	44086250	44085350	44085529	-0.014	1	1	0.959,1.0,1.0	1.0,1.0,1.0	508	149	242,164,191	3,0,0	190,226,207	0,0,0
A3SS188	ENSG00000131467.10_2	PSME3	chr17	+	40990708	40990816	40990747	40990816	40990109	40990222	0	1	1	0.002,0.017,0.003	0.009,0.007,0.007	188	149	1,6,1	356,279,274	4,3,3	338,319,326
A3SS190	ENSG00000058673.16_3	ZC3H11A	chr1	+	203771779	203772144	203772084	203772144	203770702	203770756	-0.01	0.780991	1	0.86,0.824,0.841	0.778,0.924,0.853	454	149	432,300,338	23,21,21	299,332,390	28,9,22
A3SS191	ENSG00000058673.16_3	ZC3H11A	chr1	+	203819622	203819809	203819642	203819809	203818838	203819154	-0.006	0.45174	1	0.036,0.046,0.031	0.038,0.028,0.064	169	149	22,25,17	521,453,472	20,15,35	451,456,450
A3SS192	ENSG00000197586.12_4	ENTPD6	chr20	+	25187711	25188033	25187714	25188033	25187157	25187226	-0.17	0.220723	0.786553	0.662,0.395,0.0	0.44,0.495,0.632	152	149	2,4,0	1,6,3	4,6,7	5,6,4
A3SS193	ENSG00000197586.12_4	ENTPD6	chr20	+	25205797	25205953	25205840	25205953	25204736	25204793	-0.028	0.414619	1	0.129,0.097,0.143	0.137,0.132,0.183	192	149	8,5,6	42,36,28	8,8,11	39,41,38
A3SS195	ENSG00000127507.17_4	ADGRE2	chr19	-	14866465	14866689	14866465	14866656	14867049	14867157	-0.473	1	1	NA,0.0,0.45	0.831,0.711,0.551	182	149	0,0,2	0,3,2	6,3,3	1,1,2
A3SS196	ENSG00000127507.17_4	ADGRE2	chr19	-	14876469	14877193	14876469	14876616	14877789	14877921	0.015	1	1	1.0,1.0,0.552	0.506,1.0,1.0	726	149	2,3,6	0,0,1	5,2,1	1,0,0
A3SS200	ENSG00000168010.10_3	ATG16L2	chr11	+	72532243	72532786	72532592	72532786	72528800	72528900	-0.845	1	1	0.0,NA,0.31	1.0,1.0,1.0	498	149	0,0,3	1,0,2	6,4,4	0,0,0
A3SS201	ENSG00000168010.10_3	ATG16L2	chr11	+	72532243	72532786	72532712	72532786	72528800	72528900	0.033	1	1	0.0,NA,1.0	0.591,0.352,0.458	618	149	0,0,3	1,0,0	12,9,7	2,4,2
A3SS202	ENSG00000168010.10_3	ATG16L2	chr11	+	72532592	72532786	72532712	72532786	72528800	72528900	0.182	1	1	0.356,NA,1.0	0.624,0.409,0.454	269	149	1,0,2	1,0,0	6,5,3	2,4,2
A3SS203	ENSG00000168010.10_3	ATG16L2	chr11	+	72534588	72534842	72534810	72534842	72533892	72534006	0.087	1	1	1.0,NA,1.0	1.0,1.0,0.738	371	149	8,0,6	0,0,0	6,2,7	0,0,1
A3SS206	ENSG00000188976.10_2	NOC2L	chr1	-	889383	889903	889383	889462	891302	891393	-0.015	0.00834276	0.0840957	0.021,0.02,0.025	0.032,0.027,0.051	590	149	19,17,16	224,215,159	18,17,33	138,153,155
A3SS211	ENSG00000101639.18_3	CEP192	chr18	+	13057583	13059311	13059080	13059311	13055778	13056697	-0.595	1.61038e-08	1.5566e-06	1.0,0.185,0.029	1.0,1.0,1.0	1646	149	8,5,2	0,2,6	9,11,7	0,0,0
A3SS213	ENSG00000080823.22_2	MOK	chr14	-	102698871	102699045	102698871	102699008	102700024	102700126	-0.057	1	1	1.0,0.828,1.0	1.0,1.0,1.0	186	149	5,12,8	0,2,0	5,8,5	0,0,0
A3SS214	ENSG00000080823.22_2	MOK	chr14	-	102717148	102717327	102717148	102717324	102718092	102718141	0.115	0.37035	1	0.495,0.662,0.495	0.495,0.567,0.246	152	149	2,4,1	2,2,1	6,4,2	6,3,6
A3SS216	ENSG00000129680.15_2	MAP7D3	chrX	-	135313702	135314379	135313702	135314256	135318402	135318498	0.006	0.53412	1	0.989,0.982,0.986	0.974,0.989,0.977	272	149	167,97,130	1,1,1	139,158,155	2,1,2
A3SS220	ENSG00000250571.6_3	GLI4	chr8	+	144356873	144356972	144356889	144356972	144351527	144351690	-0.188	0.0262221	0.191553	0.707,0.475,0.9	0.916,1.0,0.73	165	149	8,3,10	3,3,1	12,6,6	1,0,2
A3SS222	ENSG00000140943.16_3	MBTPS1	chr16	-	84144317	84144458	84144317	84144430	84150339	84150440	0	1	1	0.0,0.296,0.0	0.0,0.0,0.296	177	149	0,1,0	1,2,2	0,0,1	1,2,2
A3SS225	ENSG00000151067.21_3	CACNA1C	chr12	+	2760739	2760934	2760805	2760934	2757640	2757673	-0.333	1	1	NA,0.0,0.0	1.0,0.0,0.0	215	149	0,0,0	0,1,1	1,0,0	0,1,2
A3SS226	ENSG00000151067.21_3	CACNA1C	chr12	+	2783649	2783808	2783706	2783808	2778098	2778201	-0.053	0.0631954	0.351931	0.171,0.0,0.0	0.153,0.178,0.0	206	149	2,0,0	7,5,3	2,3,0	8,10,5
A3SS227	ENSG00000153113.23_4	CAST	chr5	+	96062457	96062563	96062497	96062563	96058342	96058402	-0.051	0.622658	1	0.042,0.0,0.218	0.05,0.081,0.283	189	149	2,0,6	36,26,17	1,1,4	15,9,8
A3SS228	ENSG00000153113.23_4	CAST	chr5	+	96065293	96065429	96065315	96065429	96064856	96064913	-0.001	1	1	0.0,0.003,0.0	0.0,0.003,0.004	171	149	0,1,0	366,297,258	0,2,3	615,558,614
A3SS229	ENSG00000153113.23_4	CAST	chr5	+	96100924	96101029	96100927	96101029	96093286	96093358	-0.061	0.717226	1	0.873,1.0,0.943	1.0,1.0,1.0	152	149	21,18,17	3,0,1	21,14,15	0,0,0
A3SS230	ENSG00000153113.23_4	CAST	chr5	+	96100924	96101029	96100927	96101029	96097977	96098076	-0.027	0.148776	0.614751	0.768,0.75,0.77	0.791,0.783,0.794	152	149	870,643,698	257,210,204	870,698,717	226,190,182
A3SS231	ENSG00000087274.16_3	ADD1	chr4	+	2928365	2928402	2928368	2928402	2927740	2927839	0.123	1	1	0.246,0.0,NA	0.0,0.0,0.0	152	149	1,0,0	3,6,0	0,0,0	3,2,6
A3SS232	ENSG00000133265.10_3	HSPBP1	chr19	-	55790766	55791073	55790766	55791070	55791402	55791476	0.027	0.505892	1	0.127,0.061,0.144	0.0,0.108,0.142	152	149	11,5,12	74,75,70	0,8,13	49,65,77
A3SS233	ENSG00000100038.19_3	TOP3B	chr22	-	22317118	22317392	22317118	22317265	22318294	22318400	0.042	0.626406	1	0.063,0.236,0.0	0.028,0.083,0.063	276	149	2,4,0	16,7,19	1,4,2	19,24,16
A3SS237	ENSG00000183963.18_4	SMTN	chr22	+	31483918	31484099	31483950	31484099	31479164	31479295	-0.007	1	1	0.0,0.045,0.0	0.033,0.032,0.0	181	149	0,3,0	39,52,36	1,1,0	24,25,27
A3SS238	ENSG00000183963.18_4	SMTN	chr22	+	31484439	31484592	31484498	31484592	31483950	31484099	0.004	0.711967	1	0.018,0.016,0.096	0.0,0.07,0.049	208	149	1,1,4	39,43,27	0,2,2	36,19,28
A3SS239	ENSG00000183963.18_4	SMTN	chr22	+	31491837	31492883	31492718	31492883	31491519	31491595	0	0.92959	1	0.008,0.006,0.033	0.014,0.004,0.028	1030	149	5,3,15	88,70,64	6,1,9	59,35,46
A3SS240	ENSG00000183963.18_4	SMTN	chr22	+	31495047	31495165	31495050	31495165	31494652	31494826	-0.037	0.177968	0.693049	0.943,0.971,0.949	1.0,1.0,0.974	152	149	51,34,38	3,1,2	35,17,38	0,0,1
A3SS241	ENSG00000183963.18_4	SMTN	chr22	+	31495047	31495882	31495730	31495882	31494652	31494826	-0.507	1.70901e-07	1.28484e-05	1.0,0.205,0.273	1.0,1.0,1.0	832	149	52,36,42	0,25,20	36,18,39	0,0,0
A3SS242	ENSG00000166987.14_3	MBD6	chr12	+	57918412	57918605	57918502	57918605	57918062	57918199	0.009	1	1	0.0,0.026,0.0	0.0,0.0,0.0	239	149	0,1,0	47,23,31	0,0,0	33,30,46
A3SS243	ENSG00000166987.14_3	MBD6	chr12	+	57919130	57920171	57920093	57920171	57918735	57918898	0.029	1	1	1.0,1.0,1.0	0.914,1.0,1.0	1112	149	265,136,170	0,0,0	158,158,217	2,0,0
A3SS244	ENSG00000065357.19_3	DGKA	chr12	+	56333865	56334217	56334097	56334217	56333198	56333313	-0.05	0.146212	0.609105	0.862,0.951,0.919	0.971,0.943,0.968	381	149	64,50,29	4,1,1	87,84,78	1,2,1
A3SS245	ENSG00000065357.19_3	DGKA	chr12	+	56334035	56334217	56334097	56334217	56333865	56333954	0.03	0.174572	0.684324	0.03,0.04,0.084	0.012,0.019,0.034	211	149	3,3,4	69,51,31	2,3,5	112,108,100
A3SS247	ENSG00000135297.15_2	MTO1	chr6	+	74190719	74190839	74190723	74190839	74190397	74190528	-0.163	1	1	1.0,NA,0.0	0.327,NA,1.0	153	149	1,0,0	0,0,2	1,0,1	2,0,0
A3SS248	ENSG00000135297.15_2	MTO1	chr6	+	74191751	74191967	74191762	74191967	74190397	74190528	0.003	0.668029	1	0.075,0.021,0.056	0.094,0.049,0.0	160	149	4,1,3	46,43,47	6,3,0	54,54,29
A3SS249	ENSG00000169241.17_2	SLC50A1	chr1	+	155110036	155110198	155110054	155110198	155109303	155109427	0.005	1	1	1.0,1.0,0.988	1.0,0.974,1.0	167	149	103,127,95	0,0,1	92,83,107	0,2,0
A3SS250	ENSG00000092841.18_4	MYL6	chr12	+	56552464	56552495	56552467	56552495	56552139	56552188	0.001	1	1	0.002,0.002,0.004	0.003,0.001,0.002	152	149	11,9,15	4676,4421,3808	12,4,9	3673,4049,4506
A3SS251	ENSG00000092841.18_4	MYL6	chr12	+	56553281	56553406	56553370	56553406	56552467	56552495	0.001	1	1	0.005,0.004,0.004	0.004,0.004,0.002	238	149	42,31,28	5322,5154,4505	27,31,22	4473,4793,5507
A3SS252	ENSG00000092841.18_4	MYL6	chr12	+	56553370	56553514	56553406	56553514	56552467	56552495	0	1	1	0.999,0.997,0.998	0.998,0.998,0.999	185	149	6770,6427,5750	8,15,7	5987,6310,7061	8,8,8
A3SS253	ENSG00000092841.18_4	MYL6	chr12	+	56553370	56553932	56553758	56553932	56552467	56552495	-0.184	0	0	0.743,0.747,0.736	0.92,0.919,0.939	537	149	5324,5155,4510	511,484,449	4478,4805,5513	108,117,100
A3SS254	ENSG00000092841.18_4	MYL6	chr12	+	56553370	56553932	56553808	56553932	56552467	56552495	0	1	1	1.0,1.0,0.999	1.0,1.0,1.0	587	149	6746,6482,5676	0,0,1	5731,6077,6915	0,0,0
A3SS255	ENSG00000092841.18_4	MYL6	chr12	+	56553758	56553932	56553808	56553932	56552467	56552495	0	1	1	1.0,1.0,0.999	1.0,1.0,1.0	199	149	1933,1811,1615	0,0,1	1361,1389,1502	0,0,0
A3SS256	ENSG00000092841.18_4	MYL6	chr12	+	56553758	56553932	56553808	56553932	56553370	56553406	0.002	1	1	1.0,0.998,0.999	0.996,0.997,0.997	199	149	1563,1473,1284	0,2,1	1339,1351,1484	4,3,3
A3SS257	ENSG00000162613.16_2	FUBP1	chr1	-	78413137	78413237	78413137	78413232	78414839	78414985	0.17	0.00207847	0.0298559	0.795,1.0,0.795	0.547,0.926,0.608	154	149	4,2,4	1,0,1	10,13,8	8,1,5
A3SS258	ENSG00000162613.16_2	FUBP1	chr1	-	78414089	78414599	78414089	78414459	78414839	78414985	-0.026	9.57262e-07	5.5124e-05	0.021,0.021,0.029	0.06,0.041,0.048	289	149	30,23,33	732,563,567	54,41,53	436,494,538
A3SS259	ENSG00000162613.16_2	FUBP1	chr1	-	78432732	78432785	78432732	78432782	78433310	78433350	-0.017	0.465465	1	0.284,0.252,0.302	0.284,0.303,0.303	152	149	177,126,170	438,366,385	155,143,175	383,322,394
A3SS260	ENSG00000158813.17_1	EDA	chrX	+	69253247	69253372	69253256	69253372	69250318	69250370	-0.34	1	1	0.32,1.0,NA	NA,1.0,NA	158	149	1,2,0	2,0,0	0,2,0	0,0,0
A3SS261	ENSG00000041357.15_2	PSMA4	chr15	+	78834518	78834987	78834824	78834987	78834246	78834272	0.005	1	1	0.999,0.991,0.989	0.991,0.983,0.991	455	149	2134,1773,1630	1,5,6	1046,1037,1347	3,6,4
A3SS262	ENSG00000041357.15_2	PSMA4	chr15	+	78834824	78834987	78834917	78834987	78834518	78834561	-0.002	0.52035	1	0.986,0.985,0.987	0.99,0.987,0.986	242	149	3251,2756,2522	28,26,21	1873,1678,1935	12,14,17
A3SS263	ENSG00000151276.23_3	MAGI1	chr3	-	65361419	65361623	65361419	65361620	65364935	65365229	0.188	0.0417893	0.261509	0.595,0.0,0.662	0.0,0.197,0.495	152	149	3,0,6	2,2,3	0,1,2	2,4,2
A3SS264	ENSG00000151276.23_3	MAGI1	chr3	-	65455957	65456162	65455957	65456159	65464266	65464473	0.062	0.333149	1	0.286,0.0,0.303	0.263,0.0,0.14	152	149	9,0,8	22,17,18	4,0,3	11,7,18
A3SS267	ENSG00000009950.15_4	MLXIPL	chr7	-	73010693	73011119	73010693	73010809	73011194	73011262	-0.145	1	1	1.0,1.0,0.565	1.0,1.0,1.0	459	149	6,1,4	0,0,1	8,4,7	0,0,0
A3SS268	ENSG00000009950.15_4	MLXIPL	chr7	-	73010968	73011119	73010968	73011116	73011194	73011262	-0.108	0.282654	0.909635	1.0,0.329,0.0	0.311,0.746,0.595	152	149	6,1,0	0,2,1	6,3,3	13,1,2
A3SS271	ENSG00000131018.22_1	SYNE1	chr6	-	152605112	152605319	152605112	152605307	152614722	152614884	0.111	0.00573936	0.0640559	0.419,0.0,0.0	0.0,0.085,0.0	161	149	7,0,0	9,6,2	0,1,0	2,10,3
A3SS275	ENSG00000116754.13_2	SRSF11	chr1	+	70715613	70715730	70715634	70715730	70712500	70712590	-0.009	0.112183	0.512446	0.013,0.038,0.046	0.043,0.035,0.045	170	149	11,27,38	741,593,695	38,28,38	733,675,708
A3SS276	ENSG00000164548.10_2	TRA2A	chr7	-	23545364	23545432	23545364	23545429	23545756	23545885	-0.019	0.117417	0.52614	0.933,0.947,0.945	0.983,0.934,0.964	152	149	227,201,209	16,11,12	172,172,243	3,12,9
A3SS281	ENSG00000216490.3_3	IFI30	chr19	+	18287949	18288574	18288520	18288574	18286414	18286507	-0.019	0.922185	1	0.968,0.993,0.982	1.0,1.0,1.0	720	149	737,674,534	5,1,2	414,320,443	0,0,0
A3SS283	ENSG00000180902.17_2	D2HGDH	chr2	+	242683036	242683230	242683053	242683230	242681849	242681989	0.035	1	1	1.0,1.0,0.863	0.759,1.0,1.0	166	149	3,1,7	0,0,1	7,12,5	2,0,0
A3SS285	ENSG00000160410.14_3	SHKBP1	chr19	+	41084002	41084118	41084028	41084118	41083462	41083536	0.333	1	1	1.0,0.0,0.0	0.0,0.0,0.0	175	149	1,0,0	0,2,4	0,0,0	2,1,2
A3SS286	ENSG00000160410.14_3	SHKBP1	chr19	+	41084002	41084118	41084059	41084118	41083462	41083536	0.002	1	1	0.006,0.0,0.0	0.0,0.0,0.0	206	149	1,0,0	118,102,87	0,0,0	42,58,77
A3SS287	ENSG00000160410.14_3	SHKBP1	chr19	+	41084028	41084118	41084059	41084118	41083462	41083536	-0.007	0.725471	1	0.0,0.016,0.037	0.038,0.014,0.021	180	149	0,2,4	118,102,87	2,1,2	42,58,77
A3SS288	ENSG00000160410.14_3	SHKBP1	chr19	+	41084353	41084448	41084367	41084448	41084059	41084118	0.009	1	1	0.013,0.007,0.008	0.0,0.0,0.0	163	149	2,1,1	135,126,109	0,0,0	67,56,84
A3SS289	ENSG00000160410.14_3	SHKBP1	chr19	+	41088256	41088372	41088331	41088372	41086651	41086842	0.003	1	1	1.0,0.993,1.0	0.992,0.991,1.0	224	149	278,208,202	0,1,0	198,171,160	1,1,0
A3SS290	ENSG00000160410.14_3	SHKBP1	chr19	+	41096635	41096759	41096638	41096759	41092679	41092850	-0.169	1	1	0.662,1.0,NA	NA,1.0,1.0	152	149	2,1,0	1,0,0	0,1,1	0,0,0
A3SS292	ENSG00000160410.14_3	SHKBP1	chr19	+	41096635	41096759	41096638	41096759	41094987	41095084	-0.016	0.784204	1	0.308,0.574,0.495	0.524,0.445,0.457	152	149	5,11,1	11,8,1	9,9,6	8,11,7
A3SS293	ENSG00000160410.14_3	SHKBP1	chr19	+	41096635	41096759	41096638	41096759	41096149	41096328	0.038	0.0349997	0.232451	0.938,0.962,0.988	0.957,0.867,0.95	152	149	124,103,86	8,4,1	68,93,96	3,14,5
A3SS294	ENSG00000151729.10_2	SLC25A4	chr4	+	186066508	186067053	186066912	186067053	186065917	186066404	-0.006	0.161633	0.650014	0.01,0.012,0.014	0.023,0.008,0.022	553	149	4,3,4	110,68,78	11,3,9	124,106,110
A3SS296	ENSG00000133606.10_4	MKRN1	chr7	-	140154894	140155700	140154894	140155033	140156451	140156666	0.008	1	1	1.0,0.981,1.0	1.0,0.958,1.0	816	149	320,276,253	0,1,0	286,251,260	0,2,0
A3SS297	ENSG00000140297.12_3	GCNT3	chr15	+	59908748	59909080	59908890	59909080	59903982	59904180	0.005	1	1	0.007,0.008,0.0	0.0,0.0,0.0	291	149	3,2,0	204,130,163	0,0,0	33,59,35
A3SS298	ENSG00000106077.18_2	ABHD11	chr7	-	73151258	73151550	73151258	73151440	73151891	73152065	-0.028	1	1	1.0,1.0,0.365	NA,0.633,1.0	259	149	4,1,2	0,0,2	0,3,1	0,1,0
A3SS299	ENSG00000106077.18_2	ABHD11	chr7	-	73151550	73151721	73151550	73151690	73151891	73152065	-0.074	1	1	0.853,1.0,NA	1.0,1.0,1.0	180	149	7,5,0	1,0,0	2,3,1	0,0,0
A3SS302	ENSG00000095485.17_3	CWF19L1	chr10	-	102020722	102020801	102020722	102020785	102021735	102021820	-0.017	0.718017	1	0.877,0.851,0.869	0.892,0.891,0.865	165	149	63,57,59	8,9,8	119,100,106	13,11,15
A3SS303	ENSG00000163467.11_2	TSACC	chr1	+	156316558	156316786	156316569	156316786	156314370	156314499	0.061	1	1	1.0,NA,0.0	1.0,0.0,0.318	160	149	2,0,0	0,0,1	11,0,1	0,4,2
A3SS305	ENSG00000163482.11_3	STK36	chr2	+	219554581	219554679	219554608	219554679	219553419	219553599	-0.107	1	1	1.0,0.679,1.0	1.0,1.0,1.0	176	149	4,5,6	0,2,0	4,5,13	0,0,0
A3SS306	ENSG00000163482.11_3	STK36	chr2	+	219561249	219561324	219561312	219561324	219559247	219559358	-0.113	0.33202	1	0.376,0.711,0.584	1.0,0.513,0.496	212	149	6,7,12	7,2,6	8,3,7	0,2,5
A3SS307	ENSG00000163482.11_3	STK36	chr2	+	219562576	219562724	219562625	219562724	219562185	219562333	0.047	1	1	1.0,1.0,1.0	1.0,0.858,1.0	198	149	8,5,7	0,0,0	14,8,7	0,1,0
A3SS308	ENSG00000171792.10_3	RHNO1	chr12	+	2994327	2994700	2994428	2994700	2986364	2986448	1	1	1	NA,NA,1.0	NA,NA,0.0	250	149	0,0,1	0,0,0	0,0,0	0,0,4
A3SS309	ENSG00000171792.10_3	RHNO1	chr12	+	2994327	2994700	2994448	2994700	2986388	2986448	0.019	1	1	0.0,0.0,0.058	0.0,0.0,0.0	270	149	0,0,1	16,10,9	0,0,0	40,28,32
A3SS316	ENSG00000112763.15_3	BTN2A1	chr6	+	26467946	26469865	26468175	26469865	26466289	26466316	0.066	0.123478	0.545896	0.295,0.247,0.346	0.266,0.174,0.249	378	149	51,40,43	48,48,32	23,16,21	25,30,25
A3SS317	ENSG00000164054.15_3	SHISA5	chr3	-	48509274	48510585	48509274	48509616	48510759	48510972	0.013	0.100308	0.476975	0.989,0.986,0.946	0.943,0.994,0.944	1118	149	1322,1043,924	2,2,7	1249,1151,1253	10,1,10
A3SS321	ENSG00000067182.7_2	TNFRSF1A	chr12	-	6442902	6443031	6442902	6443004	6443256	6443410	-0.002	1	1	1.0,1.0,0.993	1.0,1.0,1.0	176	149	234,153,163	0,0,1	182,212,188	0,0,0
A3SS322	ENSG00000067182.7_2	TNFRSF1A	chr12	-	6442902	6443056	6442902	6443004	6443256	6443410	-0.019	1	1	1.0,1.0,0.942	1.0,1.0,1.0	201	149	41,29,22	0,0,1	30,25,28	0,0,0
A3SS323	ENSG00000067182.7_2	TNFRSF1A	chr12	-	6442902	6443056	6442902	6443031	6443256	6443410	0.011	0.701699	1	0.017,0.026,0.012	0.0,0.022,0.0	174	149	4,4,2	197,128,143	0,5,0	152,192,160
A3SS326	ENSG00000260916.7_3	CCPG1	chr15	-	55663990	55664242	55663990	55664228	55669146	55669348	-0.005	0.920497	1	0.986,0.993,0.988	0.987,0.994,1.0	163	149	967,614,722	13,4,8	415,357,457	5,2,0
A3SS328	ENSG00000246695.7_3	RASSF8-AS1	chr12	-	26109571	26109697	26109571	26109694	26111864	26111998	0.835	1	1	1.0,NA,NA	0.0,0.495,0.0	152	149	1,0,0	0,0,0	0,1,0	1,1,1
A3SS330	ENSG00000130544.11_2	ZNF557	chr19	+	7075665	7075754	7075686	7075754	7075006	7075116	-0.143	0.111628	0.511202	0.612,0.68,0.713	0.664,0.851,0.919	170	149	18,17,17	10,7,6	18,13,13	8,2,1
A3SS331	ENSG00000100258.17_3	LMF2	chr22	-	50942768	50943156	50942768	50942880	50943230	50943413	-0.035	1	1	1.0,0.896,1.0	1.0,1.0,1.0	425	149	55,49,53	0,2,0	76,81,80	0,0,0
A3SS333	ENSG00000197563.10_3	PIGN	chr18	-	59815446	59815571	59815446	59815486	59821777	59821884	0.026	0.821801	1	1.0,1.0,0.966	0.942,0.947,1.0	234	149	57,48,45	0,0,1	51,56,64	2,2,0
A3SS335	ENSG00000112062.10_3	MAPK14	chr6	+	36043597	36043739	36043624	36043739	36041825	36041873	0	1	1	0.021,0.006,0.006	0.011,0.015,0.007	176	149	4,1,1	156,145,148	2,2,1	155,112,122
A3SS336	ENSG00000130177.14_2	CDC16	chr13	+	115002273	115002371	115002276	115002371	115002119	115002174	-0.015	0.768638	1	0.85,0.966,0.919	0.929,0.921,0.931	152	149	52,58,46	9,2,4	94,107,96	7,9,7
A3SS337	ENSG00000130177.14_2	CDC16	chr13	+	115004784	115004965	115004824	115004965	115004464	115004503	0.006	1	1	0.008,0.011,0.01	0.006,0.0,0.005	189	149	1,1,1	100,74,80	1,0,1	127,117,143
A3SS346	ENSG00000172167.7_3	MTBP	chr8	+	121475926	121476001	121475931	121476001	121473400	121473495	-0.028	0.664542	1	0.108,0.097,0.075	0.203,0.075,0.086	154	149	3,2,2	24,18,24	5,2,3	19,24,31
A3SS347	ENSG00000185722.16_3	ANKFY1	chr17	-	4085475	4085647	4085475	4085644	4086692	4086846	-0.144	0.000868734	0.0159405	0.0,0.0,0.197	0.29,0.184,0.155	152	149	0,0,2	12,8,8	5,3,3	12,13,16
A3SS348	ENSG00000163382.11_3	NAXE	chr1	+	156563199	156563347	156563255	156563347	156562348	156562462	0.009	1	1	1.0,0.996,1.0	0.995,0.986,0.989	205	149	416,368,306	0,1,0	261,286,249	1,3,2
A3SS349	ENSG00000139433.9_3	GLTP	chr12	-	110293423	110293574	110293423	110293543	110295330	110295464	0.004	1	1	0.993,1.0,1.0	0.992,1.0,0.988	180	149	173,141,153	1,0,0	159,172,98	1,0,1
A3SS351	ENSG00000104946.12_3	TBC1D17	chr19	+	50391413	50391574	50391487	50391574	50390974	50391091	0.077	0.10526	0.489983	0.416,0.346,0.458	0.308,0.305,0.375	223	149	48,42,67	45,53,53	18,25,26	27,38,29
A3SS352	ENSG00000160818.16_2	GPATCH4	chr1	-	156565872	156566040	156565872	156565923	156566178	156566270	0.002	0.960144	1	0.016,0.012,0.035	0.023,0.012,0.023	266	149	4,3,7	140,138,107	7,3,6	170,141,145
A3SS354	ENSG00000160818.16_2	GPATCH4	chr1	-	156568759	156568896	156568759	156568822	156571200	156571262	-0.004	0.903321	1	0.994,0.97,0.978	1.0,0.988,0.967	223	149	237,192,201	1,4,3	271,247,304	0,2,7
A3SS355	ENSG00000005339.14_3	CREBBP	chr16	-	3801726	3801837	3801726	3801807	3807288	3807377	-0.004	0.85558	1	0.0,0.077,0.0	0.0,0.067,0.023	179	149	0,2,0	34,20,31	0,3,1	37,35,35
A3SS357	ENSG00000187555.14_2	USP7	chr16	-	8998291	8998422	8998291	8998381	8999043	8999188	-0.006	1	1	0.992,1.0,0.991	1.0,1.0,1.0	190	149	323,276,272	2,0,2	275,251,214	0,0,0
A3SS358	ENSG00000197785.13_2	ATAD3A	chr1	+	1452546	1452792	1452690	1452792	1451391	1451468	-0.007	1	1	0.0,0.0,0.0	0.003,0.012,0.005	293	149	0,0,0	83,55,46	1,3,1	169,123,99
A3SS360	ENSG00000176986.15_2	SEC24C	chr10	+	75529104	75529491	75529372	75529491	75528764	75528910	-0.001	1	1	0.992,0.979,1.0	0.988,1.0,0.987	417	149	328,263,259	1,2,0	223,198,214	1,0,1
A3SS362	ENSG00000093009.9_2	CDC45	chr22	+	19481996	19482125	19482029	19482125	19481849	19481905	-0.04	1	1	0.0,NA,1.0	1.0,0.0,0.621	182	149	0,0,1	1,0,0	4,0,2	0,2,1
A3SS363	ENSG00000182473.21_2	EXOC7	chr17	-	74086409	74086562	74086409	74086478	74087223	74087316	-0.045	1	1	0.0,0.0,0.0	0.051,0.084,0.0	233	149	0,0,0	17,10,7	1,1,0	12,7,6
A3SS369	ENSG00000067369.13_3	TP53BP1	chr15	-	43705316	43705532	43705316	43705526	43707791	43708007	-0.017	0.389451	1	0.979,0.899,0.906	0.929,0.936,0.969	155	149	144,93,130	3,10,13	82,92,98	6,6,3
A3SS373	ENSG00000114859.15_3	CLCN2	chr3	-	184072335	184072502	184072335	184072446	184072691	184072761	0.257	0.017677	0.145862	0.421,0.267,0.686	0.267,0.068,0.267	205	149	5,1,3	5,2,1	2,1,1	4,10,2
A3SS375	ENSG00000114859.15_3	CLCN2	chr3	-	184072691	184073317	184072691	184072761	184073481	184073566	-0.089	1	1	1.0,1.0,0.733	1.0,1.0,1.0	705	149	11,5,13	0,0,1	10,11,5	0,0,0
A3SS376	ENSG00000114859.15_3	CLCN2	chr3	-	184073481	184073632	184073481	184073566	184074780	184074882	0.242	1	1	0.071,0.257,0.581	0.104,0.08,0.0	215	149	1,2,6	9,4,3	1,1,0	6,8,8
A3SS377	ENSG00000205659.10_3	LIN52	chr14	+	74562632	74562688	74562650	74562688	74557934	74558009	-0.044	0.00538203	0.0606936	0.0,0.0,0.073	0.061,0.071,0.074	167	149	0,0,3	49,44,34	3,3,5	41,35,56
A3SS378	ENSG00000083454.21_3	P2RX5	chr17	-	3592785	3592924	3592785	3592921	3593363	3593444	0.008	0.879166	1	0.662,0.718,0.884	0.74,0.777,0.723	152	149	32,26,31	16,10,4	32,32,48	11,9,18
A3SS379	ENSG00000109113.19_4	RAB34	chr17	-	27042212	27042294	27042212	27042232	27042473	27042525	-0.053	0.000164239	0.00431763	0.926,0.889,0.855	0.929,0.956,0.945	211	149	426,396,308	24,35,37	534,487,464	29,16,19
A3SS380	ENSG00000109113.19_4	RAB34	chr17	-	27042212	27042294	27042212	27042232	27042658	27042723	-0.039	0.216309	0.777992	0.938,1.0,0.928	1.0,0.984,1.0	211	149	64,54,55	3,0,3	84,89,61	0,1,0
A3SS381	ENSG00000109113.19_4	RAB34	chr17	-	27043010	27043079	27043010	27043076	27043920	27044012	0.018	0.347933	1	0.091,0.072,0.134	0.038,0.088,0.118	152	149	18,11,21	177,138,133	11,23,34	276,234,250
A3SS383	ENSG00000109113.19_4	RAB34	chr17	-	27044230	27044443	27044230	27044416	27045139	27045185	-0.005	1	1	1.0,0.981,0.977	1.0,0.981,0.993	176	149	135,124,100	0,2,2	117,120,157	0,2,1
A3SS384	ENSG00000109113.19_4	RAB34	chr17	-	27044230	27044638	27044230	27044416	27045139	27045185	-0.007	0.716802	1	1.0,0.966,0.964	1.0,0.967,0.983	371	149	133,142,133	0,2,2	155,147,148	0,2,1
A3SS385	ENSG00000109113.19_4	RAB34	chr17	-	27044230	27044665	27044230	27044416	27045139	27045185	-0.007	0.762914	1	1.0,0.966,0.963	1.0,0.966,0.983	398	149	140,154,141	0,2,2	158,153,159	0,2,1
A3SS386	ENSG00000109113.19_4	RAB34	chr17	-	27044230	27044638	27044230	27044443	27045139	27045185	-0.009	0.839095	1	0.298,0.344,0.393	0.407,0.373,0.283	344	149	91,103,100	93,85,67	103,99,93	65,72,102
A3SS387	ENSG00000109113.19_4	RAB34	chr17	-	27044230	27044665	27044230	27044443	27045139	27045185	-0.005	0.941889	1	0.297,0.352,0.393	0.396,0.369,0.291	371	149	98,115,108	93,85,67	106,105,104	65,72,102
A3SS388	ENSG00000109113.19_4	RAB34	chr17	-	27044230	27044665	27044230	27044638	27045139	27045185	-0.048	1	1	1.0,0.856,1.0	1.0,1.0,1.0	176	149	7,14,8	0,2,0	3,6,11	0,0,0
A3SS389	ENSG00000109113.19_4	RAB34	chr17	-	27044230	27044443	27044230	27044309	27045139	27045286	0.065	0.00216222	0.0307194	0.907,0.954,0.927	0.84,0.874,0.88	283	149	260,236,194	14,6,8	229,251,293	23,19,21
A3SS390	ENSG00000165269.12_3	AQP7	chr9	-	33384947	33385288	33384947	33385229	33385646	33385864	-0.05	1	1	0.851,1.0,1.0	1.0,1.0,NA	208	149	8,5,6	1,0,0	1,2,0	0,0,0
A3SS391	ENSG00000165269.12_3	AQP7	chr9	-	33395075	33395511	33395075	33395193	33401234	33401285	-0.817	1	1	0.096,0.242,0.21	NA,NA,1.0	467	149	4,5,5	12,5,6	0,0,1	0,0,0
A3SS395	ENSG00000112303.13_2	VNN2	chr6	-	133072283	133072657	133072283	133072653	133076981	133077174	-0.5	1	1	1.0,NA,0.0	NA,NA,1.0	153	149	3,0,0	0,0,1	0,0,1	0,0,0
A3SS402	ENSG00000213676.10_3	ATF6B	chr6	-	32084813	32084907	32084813	32084884	32085099	32085181	0.02	0.157076	0.638329	0.081,0.071,0.076	0.068,0.045,0.055	172	149	22,14,12	216,159,126	18,12,14	213,219,209
A3SS403	ENSG00000122952.16_3	ZWINT	chr10	-	58118316	58118485	58118316	58118448	58118565	58118708	-0.017	0.0817879	0.416294	0.92,0.954,0.934	0.967,0.938,0.954	186	149	418,334,406	29,13,23	509,455,392	14,24,15
A3SS410	ENSG00000169598.15_2	DFFB	chr1	+	3782206	3782564	3782325	3782564	3775281	3775408	-0.188	1	1	1.0,NA,0.625	1.0,NA,1.0	268	149	2,0,3	0,0,1	3,0,1	0,0,0
A3SS411	ENSG00000169598.15_2	DFFB	chr1	+	3782206	3782564	3782375	3782564	3775281	3775408	-0.172	0.866716	1	0.19,0.0,0.484	1.0,0.0,0.19	318	149	3,0,4	6,2,2	3,0,2	0,6,4
A3SS412	ENSG00000169598.15_2	DFFB	chr1	+	3782325	3782564	3782375	3782564	3775281	3775408	0.101	1	1	0.111,0.0,0.428	NA,0.0,0.158	199	149	1,0,2	6,2,2	0,0,1	0,6,4
A3SS413	ENSG00000169598.15_2	DFFB	chr1	+	3782325	3782564	3782375	3782564	3775281	3775430	0.5	1	1	1.0,NA,1.0	NA,0.0,1.0	199	149	1,0,1	0,0,0	0,0,1	0,1,0
A3SS416	ENSG00000028528.14_3	SNX1	chr15	+	64410315	64410443	64410401	64410443	64404771	64404883	-0.002	1	1	1.0,1.0,0.99	1.0,0.995,1.0	235	149	574,374,458	0,0,3	295,342,417	0,1,0
A3SS417	ENSG00000028528.14_3	SNX1	chr15	+	64422071	64422228	64422114	64422228	64419929	64420005	-0.007	0.974744	1	0.012,0.0,0.008	0.027,0.003,0.011	192	149	6,0,3	396,290,276	9,1,4	249,229,288
A3SS418	ENSG00000106689.10_3	LHX2	chr9	+	126777376	126777804	126777400	126777804	126776239	126776442	-0.017	0.536564	1	0.076,0.05,0.0	0.0,0.177,0.0	173	149	2,2,0	21,33,28	0,1,0	3,4,8
A3SS419	ENSG00000141295.13_2	SCRN2	chr17	-	45915896	45916085	45915896	45916062	45916156	45916372	-0.006	0.430782	1	0.0,0.035,0.026	0.0,0.053,0.027	172	149	0,1,1	29,24,32	0,2,1	25,31,31
A3SS420	ENSG00000141295.13_2	SCRN2	chr17	-	45916809	45917224	45916809	45917009	45917556	45917738	0.004	0.816847	1	0.051,0.009,0.044	0.028,0.0,0.063	364	149	5,1,5	38,44,44	4,0,8	56,54,49
A3SS425	ENSG00000105705.15_4	SUGP1	chr19	-	19413073	19413252	19413073	19413197	19414156	19414257	0.026	0.292136	0.930742	0.017,0.039,0.066	0.01,0.023,0.01	204	149	1,2,3	42,36,31	1,2,1	72,61,73
A3SS426	ENSG00000105705.15_4	SUGP1	chr19	-	19414156	19414257	19414156	19414215	19416657	19416885	-0.116	0.853353	1	1.0,1.0,0.539	1.0,0.886,1.0	191	149	11,5,3	0,0,2	13,10,15	0,1,0
A3SS427	ENSG00000105705.15_4	SUGP1	chr19	-	19414532	19414721	19414532	19414656	19416657	19416885	0.072	0.0407988	0.258599	0.078,0.094,0.222	0.042,0.077,0.058	214	149	4,4,9	33,27,22	4,5,6	63,42,68
A3SS428	ENSG00000105705.15_4	SUGP1	chr19	-	19414532	19414852	19414532	19414656	19416657	19416885	0.016	0.547769	1	0.105,0.074,0.089	0.064,0.102,0.054	345	149	9,5,5	33,27,22	10,11,9	63,42,68
A3SS429	ENSG00000105705.15_4	SUGP1	chr19	-	19414532	19414852	19414532	19414721	19416657	19416885	-0.371	0.019424	0.154621	0.651,0.444,0.096	0.788,1.0,0.516	280	149	7,3,1	2,2,5	7,6,6	1,0,3
A3SS430	ENSG00000105705.15_4	SUGP1	chr19	-	19427230	19427402	19427230	19427331	19431271	19431318	0.008	1	1	1.0,0.977,1.0	0.981,0.973,1.0	220	149	96,62,74	0,1,0	151,107,140	2,2,0
A3SS431	ENSG00000150455.13_2	TIRAP	chr11	+	126161167	126161464	126161319	126161464	126160697	126160856	0	0.760315	1	0.0,0.0,0.331	0.0,0.331,0.0	301	149	0,0,2	12,5,2	0,3,0	11,3,7
A3SS432	ENSG00000105698.15_2	USF2	chr19	+	35761620	35761708	35761661	35761708	35760483	35760602	0.003	1	1	1.0,1.0,0.969	0.979,0.98,1.0	190	149	198,159,157	0,0,4	117,125,106	2,2,0
A3SS433	ENSG00000105698.15_2	USF2	chr19	+	35769600	35769977	35769848	35769977	35761985	35762044	-0.007	1	1	0.991,0.995,0.994	1.0,1.0,1.0	397	149	609,506,457	2,1,1	399,386,449	0,0,0
A3SS434	ENSG00000105698.15_2	USF2	chr19	+	35769848	35769977	35769872	35769977	35769600	35769695	-0.012	0.0668127	0.367094	0.979,0.971,0.955	0.969,0.984,0.987	173	149	659,535,488	12,14,20	430,422,514	12,6,6
A3SS438	ENSG00000196531.10_3	NACA	chr12	-	57108385	57108471	57108385	57108459	57118235	57118307	0	1	1	0.993,0.998,0.994	0.997,0.994,0.995	161	149	4083,3303,3267	25,7,19	3670,3759,4228	11,22,20
A3SS439	ENSG00000196531.10_3	NACA	chr12	-	57108385	57108487	57108385	57108459	57118235	57118307	0.002	0.92917	1	0.889,0.954,0.903	0.936,0.89,0.913	177	149	237,171,211	25,7,19	190,211,248	11,22,20
A3SS440	ENSG00000196531.10_3	NACA	chr12	-	57108385	57108487	57108385	57108471	57118235	57118307	0	1	1	0.009,0.007,0.009	0.005,0.008,0.011	165	149	40,26,30	3886,3158,3086	21,32,49	3501,3580,4029
A3SS441	ENSG00000196531.10_3	NACA	chr12	-	57118235	57118333	57118235	57118307	57119046	57119083	-0.003	0.678396	1	0.078,0.071,0.078	0.082,0.076,0.079	175	149	219,162,166	2190,1801,1665	181,175,217	1716,1812,2153
A3SS442	ENSG00000160679.12_2	CHTOP	chr1	+	153614718	153614905	153614721	153614905	153610770	153610924	-0.016	0.527623	1	0.553,0.537,0.579	0.559,0.572,0.586	152	149	398,349,372	315,295,265	261,284,368	202,208,255
A3SS443	ENSG00000162664.16_2	ZNF326	chr1	+	90472903	90473309	90473170	90473309	90470691	90470803	0.018	1	1	1.0,0.97,1.0	0.915,1.0,1.0	416	149	227,183,193	0,2,0	90,69,119	3,0,0
A3SS444	ENSG00000256269.7_3	HMBS	chr11	+	118959791	118959841	118959809	118959841	118959344	118959417	-0.001	1	1	0.972,1.0,0.989	1.0,0.964,1.0	167	149	156,117,105	4,0,1	190,151,150	0,5,0
A3SS445	ENSG00000256269.7_3	HMBS	chr11	+	118960392	118960777	118960699	118960777	118959926	118959982	-0.095	4.87922e-07	3.34319e-05	0.853,0.924,0.939	1.0,1.0,1.0	456	149	178,149,94	10,4,2	197,189,146	0,0,0
A3SS446	ENSG00000256269.7_3	HMBS	chr11	+	118962834	118963233	118963113	118963233	118962122	118962236	0.009	1	1	1.0,0.957,1.0	0.962,0.967,1.0	428	149	106,64,73	0,1,0	72,84,102	1,1,0
A3SS447	ENSG00000147894.14_2	C9orf72	chr9	-	27558488	27560297	27558488	27558605	27561582	27561647	-0.113	1	1	0.66,1.0,1.0	1.0,1.0,1.0	1841	149	24,13,36	1,0,0	59,59,79	0,0,0
A3SS448	ENSG00000090686.15_2	USP48	chr1	-	22033236	22033400	22033236	22033361	22041881	22041950	0.009	0.905173	1	0.018,0.0,0.019	0.004,0.005,0.0	188	149	4,0,3	171,107,120	1,1,0	208,157,154
A3SS449	ENSG00000090686.15_2	USP48	chr1	-	22047528	22047659	22047528	22047656	22048142	22048257	-0.115	0.00177939	0.0269815	0.757,0.669,0.61	0.802,0.769,0.809	152	149	127,97,91	40,47,57	203,153,130	49,45,30
A3SS450	ENSG00000090686.15_2	USP48	chr1	-	22056196	22056325	22056196	22056322	22062938	22063118	-0.016	0.388907	1	0.811,0.857,0.89	0.932,0.811,0.862	152	149	188,128,149	43,21,18	139,114,108	10,26,17
A3SS451	ENSG00000090686.15_2	USP48	chr1	-	22056196	22056325	22056196	22056322	22073559	22073642	0.252	1	1	NA,1.0,1.0	1.0,NA,0.495	152	149	0,3,1	0,0,0	1,0,2	0,0,2
A3SS452	ENSG00000104783.11_2	KCNN4	chr19	-	44273114	44273712	44273114	44273184	44273870	44273981	-0.097	3.05582e-06	0.000150374	0.892,0.954,0.863	1.0,1.0,1.0	677	149	224,189,201	6,2,7	175,187,206	0,0,0
A3SS453	ENSG00000124496.12_2	TRERF1	chr6	-	42200418	42200666	42200418	42200630	42203942	42204149	0.17	0.101324	0.478593	0.436,0.384,0.496	0.187,0.118,0.502	185	149	23,17,22	24,22,18	4,1,10	14,6,8
A3SS455	ENSG00000008405.11_3	CRY1	chr12	-	107391071	107391184	107391071	107391164	107391265	107391468	0.002	1	1	0.006,0.0,0.0	0.0,0.0,0.0	169	149	1,0,0	143,98,103	0,0,0	22,17,32
A3SS458	ENSG00000180071.19_3	ANKRD18A	chr9	-	38571354	38573126	38571354	38572056	38575472	38575695	-0.288	1	1	NA,1.0,0.423	1.0,1.0,1.0	1219	149	0,1,6	0,0,1	6,5,3	0,0,0
A3SS462	ENSG00000151135.9_2	TMEM263	chr12	+	107353047	107353163	107353065	107353163	107350859	107350927	-0.091	1	1	NA,1.0,0.0	1.0,NA,0.182	167	149	0,1,0	0,0,1	1,0,1	0,0,4
A3SS463	ENSG00000105483.17_3	CARD8	chr19	-	48733694	48733957	48733694	48733954	48734033	48734263	-0.12	1	1	1.0,1.0,0.495	0.855,1.0,1.0	152	149	2,4,1	0,0,1	6,5,6	1,0,0
A3SS464	ENSG00000105483.17_3	CARD8	chr19	-	48735709	48736046	48735709	48735750	48737659	48737800	-0.033	0.00741438	0.0779301	0.0,0.0,0.251	0.063,0.0,0.287	445	149	0,0,1	1,3,1	1,0,6	5,1,5
A3SS465	ENSG00000105483.17_3	CARD8	chr19	-	48741639	48741789	48741639	48741783	48744218	48744320	-0.007	1	1	1.0,1.0,0.942	1.0,1.0,0.962	155	149	15,13,17	0,0,1	20,27,26	0,0,1
A3SS467	ENSG00000175550.7_2	DRAP1	chr11	+	65688018	65688133	65688039	65688133	65687813	65687933	-0.001	1	1	0.002,0.004,0.005	0.004,0.002,0.007	170	149	3,5,6	1075,1039,951	5,2,7	977,797,904
A3SS468	ENSG00000278053.4_2	DDX52	chr17	-	35979812	35981322	35979812	35979884	35981442	35981565	-0.021	1	1	1.0,0.936,1.0	1.0,1.0,1.0	1587	149	219,155,169	0,1,0	172,157,170	0,0,0
A3SS473	ENSG00000144061.12_4	NPHP1	chr2	-	110920624	110920712	110920624	110920709	110922264	110922307	-0.322	0.087879	0.437214	0.329,0.329,0.495	0.551,1.0,0.567	152	149	1,1,1	2,2,1	5,1,4	4,0,3
A3SS474	ENSG00000117266.15_4	CDK18	chr1	+	205492610	205492843	205492673	205492843	205492274	205492425	-0.021	1	1	0.937,1.0,1.0	1.0,1.0,1.0	212	149	21,19,14	1,0,0	19,11,15	0,0,0
A3SS476	ENSG00000117266.15_4	CDK18	chr1	+	205499313	205499477	205499386	205499477	205498648	205498691	-0.011	1	1	0.0,0.0,0.024	0.0,0.0,0.058	222	149	0,0,1	17,14,27	0,0,2	20,28,22
A3SS477	ENSG00000122140.10_3	MRPS2	chr9	+	138393544	138393819	138393689	138393819	138392843	138392969	0.023	0.000451524	0.0095584	0.021,0.021,0.049	0.005,0.0,0.018	294	149	7,6,14	169,139,139	2,0,7	201,202,190
A3SS478	ENSG00000119682.16_3	AREL1	chr14	-	75136649	75136845	75136649	75136829	75137464	75137574	0.047	1	1	0.0,0.114,0.065	0.0,0.0,0.039	165	149	0,1,1	29,7,13	0,0,1	16,6,22
A3SS480	ENSG00000189306.10_2	RRP7A	chr22	-	42912016	42912302	42912016	42912142	42914010	42914153	-0.003	1	1	0.007,0.0,0.028	0.005,0.011,0.028	309	149	1,0,4	72,77,66	1,2,4	94,86,67
A3SS481	ENSG00000004864.13_2	SLC25A13	chr7	-	95814238	95814326	95814238	95814323	95818605	95818690	0	0.250492	0.845333	0.02,0.082,0.0	0.047,0.0,0.054	152	149	1,2,0	47,22,45	3,0,3	59,47,52
A3SS483	ENSG00000178971.13_3	CTC1	chr17	-	8133208	8133286	8133208	8133240	8133611	8133786	-0.05	0.698535	1	1.0,0.842,0.867	1.0,1.0,0.859	195	149	14,7,17	0,1,2	16,12,8	0,0,1
A3SS485	ENSG00000065413.18_3	ANKRD44	chr2	-	197953434	197953552	197953434	197953498	197954673	197954756	-0.399	0.0669437	0.367139	0.0,0.0,0.0	0.0,0.197,1.0	203	149	0,0,0	10,6,7	0,2,2	3,6,0
A3SS487	ENSG00000103248.18_4	MTHFSD	chr16	-	86588250	86588357	86588250	86588354	86588774	86588809	0.184	0.187513	0.713287	0.329,0.71,0.855	0.495,0.495,0.353	152	149	3,5,6	6,2,1	3,7,5	3,7,9
A3SS488	ENSG00000139197.10_3	PEX5	chr12	+	7356027	7356147	7356051	7356147	7355207	7355300	-0.015	0.813366	1	0.804,0.902,0.892	0.909,0.838,0.895	173	149	38,32,67	8,3,7	105,72,69	9,12,7
A3SS489	ENSG00000136044.11_2	APPL2	chr12	-	105582050	105582225	105582050	105582174	105583549	105583602	0.007	1	1	1.0,1.0,1.0	1.0,1.0,0.978	200	149	94,70,81	0,0,0	156,104,120	0,0,2
A3SS490	ENSG00000136044.11_2	APPL2	chr12	-	105583549	105583667	105583549	105583602	105583768	105583933	0.007	1	1	0.0,0.019,0.008	0.0,0.0,0.006	214	149	0,2,1	92,73,87	0,0,1	154,99,114
A3SS491	ENSG00000136044.11_2	APPL2	chr12	-	105593150	105593309	105593150	105593302	105597480	105597563	-0.006	0.900973	1	0.984,1.0,0.915	0.968,0.985,0.965	156	149	66,35,45	1,0,4	95,68,57	3,1,2
A3SS492	ENSG00000136044.11_2	APPL2	chr12	-	105601748	105601807	105601748	105601779	105601935	105601977	0.011	1	1	1.0,1.0,1.0	1.0,1.0,0.967	177	149	57,38,49	0,0,0	67,71,69	0,0,2
A3SS493	ENSG00000136044.11_2	APPL2	chr12	-	105601748	105601825	105601748	105601779	105601935	105601977	0.082	1	1	1.0,1.0,1.0	1.0,1.0,0.753	195	149	5,6,8	0,0,0	13,1,8	0,0,2
A3SS494	ENSG00000136044.11_2	APPL2	chr12	-	105601748	105601825	105601748	105601807	105601935	105601977	0.004	0.747407	1	0.017,0.09,0.0	0.07,0.012,0.014	167	149	1,4,0	53,36,41	5,1,1	59,71,62
A3SS495	ENSG00000170776.21_4	AKAP13	chr15	+	86253809	86253876	86253812	86253876	86251249	86251317	0.023	0.32064	0.980577	0.936,0.9,0.938	0.839,1.0,0.866	152	149	104,55,77	7,6,5	64,50,46	12,0,7
A3SS496	ENSG00000091732.15_2	ZC3HC1	chr7	-	129664102	129664346	129664102	129664217	129665997	129666152	0.022	1	1	1.0,1.0,1.0	1.0,1.0,0.935	278	149	81,73,73	0,0,0	87,89,81	0,0,3
A3SS497	ENSG00000140905.10_3	GCSH	chr16	-	81118067	81118199	81118067	81118139	81121205	81121269	0.001	1	1	1.0,1.0,1.0	1.0,0.998,1.0	209	149	668,566,500	0,0,0	912,713,575	0,1,0
A3SS498	ENSG00000084623.11_2	EIF3I	chr1	+	32691749	32691921	32691771	32691921	32690010	32690076	0.003	1	1	0.005,0.001,0.006	0.002,0.0,0.0	171	149	4,1,4	729,650,580	1,0,0	532,538,506
A3SS499	ENSG00000225383.7_3	SFTA1P	chr10	-	10828607	10828718	10828607	10828698	10834334	10834488	0.026	0.480097	1	0.381,0.374,0.343	0.393,0.351,0.277	169	149	69,61,55	99,90,93	39,35,33	53,57,76
A3SS501	ENSG00000185728.16_3	YTHDF3	chr8	+	64087889	64087975	64087895	64087975	64081945	64081970	0.015	1	1	1.0,1.0,1.0	0.977,1.0,0.978	155	149	50,28,34	0,0,0	45,33,47	1,0,1
A3SS503	ENSG00000073584.18_3	SMARCE1	chr17	-	38787843	38788619	38787843	38787945	38792182	38792354	-0.009	1	1	1.0,1.0,0.974	1.0,1.0,1.0	823	149	253,215,206	0,0,1	369,338,406	0,0,0
A3SS504	ENSG00000011260.13_2	UTP18	chr17	+	49365389	49365564	49365484	49365564	49362605	49362729	-0.025	0.000610208	0.0121436	0.954,0.954,0.984	0.986,1.0,0.981	244	149	408,370,301	12,11,3	338,323,346	3,0,4
A3SS505	ENSG00000173653.7_3	RCE1	chr11	+	66611426	66611510	66611430	66611510	66611229	66611332	0.075	0.174167	0.683661	0.688,0.884,0.757	0.697,0.745,0.661	153	149	34,39,32	15,5,10	33,30,38	14,10,19
A3SS506	ENSG00000100731.15_3	PCNX1	chr14	+	71479701	71479919	71479716	71479919	71478208	71478266	0.004	0.690998	1	0.72,1.0,1.0	0.845,1.0,0.864	164	149	17,13,10	6,0,0	12,10,14	2,0,2
A3SS507	ENSG00000137216.18_2	TMEM63B	chr6	+	44102156	44102480	44102297	44102480	44095375	44095415	0.031	0.00504528	0.0586054	0.033,0.06,0.204	0.204,0.0,0.0	290	149	1,2,7	15,16,14	1,0,0	2,1,4
A3SS508	ENSG00000004139.13_3	SARM1	chr17	+	26715368	26715558	26715378	26715558	26715192	26715295	-0.061	0.485579	1	0.789,0.692,0.757	0.817,0.789,0.814	159	149	4,12,10	1,5,3	19,12,14	4,3,3
A3SS509	ENSG00000137500.9_3	CCDC90B	chr11	-	82984835	82985035	82984835	82984907	82985681	82985783	0.004	1	1	1.0,1.0,1.0	0.988,1.0,1.0	277	149	183,165,178	0,0,0	298,238,232	2,0,0
A3SS510	ENSG00000137500.9_3	CCDC90B	chr11	-	82985681	82985806	82985681	82985783	82989768	82989872	0.008	1	1	0.0,0.015,0.008	0.0,0.0,0.0	172	149	0,2,1	128,114,107	0,0,0	189,160,125
A3SS511	ENSG00000137500.9_3	CCDC90B	chr11	-	82984993	82985783	82984993	82985035	82991183	82991303	0.063	1	1	1.0,1.0,1.0	1.0,0.812,1.0	897	149	36,21,27	0,0,0	55,26,38	0,1,0
A3SS514	ENSG00000177084.16_4	POLE	chr12	-	133208900	133209094	133208900	133209074	133209249	133209381	-0.022	0.349893	1	0.851,1.0,0.885	0.921,0.943,0.939	169	149	65,55,61	10,0,7	79,75,105	6,4,6
A3SS515	ENSG00000177084.16_4	POLE	chr12	-	133234453	133235260	133234453	133234556	133235880	133236095	0.002	1	1	0.0,0.007,0.0	0.0,0.0,0.0	853	149	0,1,0	44,25,38	0,0,0	87,56,74
A3SS516	ENSG00000177084.16_4	POLE	chr12	-	133252679	133252790	133252679	133252770	133253131	133253239	0.012	1	1	0.98,1.0,1.0	0.943,1.0,1.0	169	149	56,16,30	1,0,0	56,49,51	3,0,0
A3SS517	ENSG00000050748.17_4	MAPK9	chr5	-	179660593	179663531	179660593	179663526	179665331	179665403	0.045	0.0634238	0.35284	0.205,0.168,0.228	0.127,0.139,0.199	154	149	43,29,41	161,139,134	27,32,42	179,191,164
A3SS522	ENSG00000135919.12_3	SERPINE2	chr2	-	224845027	224845117	224845027	224845114	224847397	224847498	0.004	0.726761	1	0.213,0.184,0.211	0.208,0.215,0.173	152	149	151,90,112	546,390,411	65,35,48	242,125,225
A3SS523	ENSG00000050130.17_2	JKAMP	chr14	+	59953430	59953522	59953448	59953522	59951707	59951834	-0.257	0.000689151	0.0134671	0.586,0.684,0.616	0.781,0.877,1.0	167	149	19,17,9	12,7,5	16,16,15	4,2,0
A3SS524	ENSG00000116698.21_3	SMG7	chr1	+	183486760	183486955	183486822	183486955	183485008	183485126	0.049	0.0125888	0.112633	0.142,0.118,0.104	0.024,0.127,0.066	211	149	23,15,15	98,79,91	3,12,7	85,58,70
A3SS525	ENSG00000087460.24_3	GNAS	chr20	+	57478582	57478640	57478585	57478640	57470666	57470739	-0.087	1.07791e-05	0.000440401	0.6,0.612,0.625	0.703,0.696,0.699	152	149	1964,1854,1565	1284,1154,922	2070,1733,1717	858,742,726
A3SS526	ENSG00000087460.24_3	GNAS	chr20	+	57478582	57478640	57478585	57478640	57473995	57474040	0.028	0.0870824	0.434246	0.221,0.216,0.178	0.168,0.19,0.173	152	149	183,129,108	634,459,488	253,269,222	1229,1122,1043
A3SS531	ENSG00000006712.14_3	PAF1	chr19	-	39880119	39880401	39880119	39880186	39880708	39880801	-0.009	1	1	0.973,1.0,1.0	1.0,1.0,1.0	364	149	173,134,159	2,0,0	159,137,146	0,0,0
A3SS532	ENSG00000006712.14_3	PAF1	chr19	-	39880708	39880929	39880708	39880801	39881457	39881794	-0.007	0.524522	1	0.875,0.952,0.985	0.968,0.985,0.879	277	149	117,111,124	9,3,1	112,120,81	2,1,6
A3SS544	ENSG00000166441.12_3	RPL27A	chr11	+	8705409	8705628	8705507	8705628	8704748	8704812	-0.026	1	1	1.0,0.923,1.0	1.0,1.0,1.0	247	149	37,20,30	0,1,0	15,21,12	0,0,0
A3SS545	ENSG00000166441.12_3	RPL27A	chr11	+	8705409	8705628	8705552	8705628	8704748	8704812	0.002	1	1	0.004,0.002,0.004	0.002,0.002,0.001	292	149	46,24,34	6195,5686,4899	24,26,17	5932,6907,7777
A3SS546	ENSG00000166441.12_3	RPL27A	chr11	+	8705507	8705628	8705552	8705628	8704748	8704812	0	1	1	0.001,0.001,0.001	0.001,0.001,0.0	194	149	9,5,4	6195,5686,4899	9,5,5	5932,6907,7777
A3SS547	ENSG00000166441.12_3	RPL27A	chr11	+	8706232	8706439	8706264	8706439	8705552	8705628	0	1	1	0.0,0.0,0.001	0.0,0.001,0.001	181	149	3,1,5	6622,5942,5464	3,6,8	7290,7627,8102
A3SS548	ENSG00000166441.12_3	RPL27A	chr11	+	8706232	8706439	8706369	8706439	8705552	8705628	0.026	0.000150425	0.00407126	0.943,0.95,0.937	0.929,0.927,0.896	286	149	3685,3285,3032	117,90,106	4795,4672,4747	192,192,288
A3SS549	ENSG00000166441.12_3	RPL27A	chr11	+	8706264	8706439	8706369	8706439	8705552	8705628	0.011	1.01134e-05	0.000427687	0.981,0.984,0.979	0.974,0.974,0.963	254	149	10304,9226,8491	117,90,106	12082,12293,12841	192,192,288
A3SS550	ENSG00000099977.13_3	DDT	chr22	-	24315292	24315536	24315292	24315532	24315956	24316132	-0.042	1	1	0.0,0.245,NA	0.493,0.0,0.0	153	149	0,1,0	3,3,0	1,0,0	1,4,3
A3SS552	ENSG00000133731.9_2	IMPA1	chr8	-	82588468	82588514	82588468	82588500	82591360	82591465	0.015	1	1	1.0,0.981,1.0	1.0,0.964,0.973	163	149	49,58,47	0,1,0	54,58,39	0,2,1
A3SS553	ENSG00000133731.9_2	IMPA1	chr8	-	82592884	82593018	82592884	82593014	82593732	82593819	-0.049	0.00580202	0.0643769	0.918,0.911,0.934	0.959,0.95,1.0	153	149	80,63,73	7,6,5	72,59,80	3,3,0
A3SS554	ENSG00000136699.19_3	SMPD4	chr2	-	130914157	130914248	130914157	130914199	130914823	130914969	0.006	1	1	1.0,1.0,1.0	1.0,1.0,0.982	198	149	74,72,58	0,0,0	56,68,72	0,0,1
A3SS555	ENSG00000136699.19_3	SMPD4	chr2	-	130914157	130914386	130914157	130914199	130914823	130914969	0.041	1	1	1.0,1.0,1.0	1.0,1.0,0.876	336	149	22,22,23	0,0,0	21,30,16	0,0,1
A3SS556	ENSG00000136699.19_3	SMPD4	chr2	-	130914157	130914386	130914157	130914248	130914823	130914969	0.029	0.0576889	0.328705	0.065,0.045,0.061	0.014,0.037,0.033	287	149	8,5,5	60,55,40	1,3,4	36,41,60
A3SS557	ENSG00000136699.19_3	SMPD4	chr2	-	130931086	130931229	130931086	130931177	130932486	130932573	-0.007	1	1	1.0,0.978,1.0	1.0,1.0,1.0	201	149	82,60,65	0,1,0	75,84,51	0,0,0
A3SS558	ENSG00000237289.9_2	CKMT1B	chr15	+	43887076	43887368	43887169	43887368	43886224	43886565	0.412	1	1	0.235,0.0,1.0	NA,NA,0.0	242	149	1,0,1	2,1,0	0,0,0	0,0,1
A3SS559	ENSG00000237289.9_2	CKMT1B	chr15	+	43889573	43890525	43890390	43890525	43888605	43888729	-0.84	1	1	0.0,0.0,0.481	NA,1.0,NA	966	149	0,0,6	3,1,1	0,1,0	0,0,0
A3SS560	ENSG00000154358.20_3	OBSCN	chr1	+	228527642	228527802	228527645	228527802	228526553	228526727	0.104	0.230982	0.807746	0.134,0.37,0.447	0.076,0.303,0.259	152	149	3,6,14	19,10,17	3,12,10	36,27,28
A3SS561	ENSG00000154358.20_3	OBSCN	chr1	+	228565631	228565707	228565637	228565707	228565189	228565413	0.009	1	1	1.0,1.0,1.0	1.0,1.0,0.972	155	149	17,16,14	0,0,0	14,22,36	0,0,1
A3SS562	ENSG00000181085.14_2	MAPK15	chr8	+	144800893	144801075	144800944	144801075	144800381	144800472	0.037	1	1	0.11,0.0,0.0	0.0,0.0,0.0	200	149	1,0,0	6,2,9	0,0,0	14,5,8
A3SS564	ENSG00000034152.18_3	MAP2K3	chr17	+	21203782	21203970	21203856	21203970	21202189	21202238	0	1	1	0.002,0.004,0.0	0.0,0.0,0.005	223	149	1,2,0	303,302,194	0,0,1	165,136,147
A3SS565	ENSG00000221926.11_4	TRIM16	chr17	-	15580489	15580594	15580489	15580591	15580888	15581035	0.041	0.575683	1	0.949,1.0,1.0	0.927,1.0,0.898	152	149	19,16,8	1,0,0	13,13,18	1,0,2
A3SS566	ENSG00000221926.11_4	TRIM16	chr17	-	15580888	15581035	15580888	15580996	15584178	15584267	-0.064	0.493582	1	0.877,0.931,1.0	1.0,1.0,1.0	188	149	18,17,12	2,1,0	11,18,17	0,0,0
A3SS567	ENSG00000221926.11_4	TRIM16	chr17	-	15586167	15586278	15586167	15586265	15586349	15586471	-0.036	0.801733	1	0.062,0.0,0.0	0.0,0.17,0.0	162	149	2,0,0	28,9,16	0,4,0	18,18,18
A3SS568	ENSG00000101040.19_3	ZMYND8	chr20	-	45927472	45927691	45927472	45927616	45938799	45938948	-0.017	0.875923	1	0.559,0.361,0.473	0.523,0.467,0.454	224	149	61,28,54	32,33,40	28,29,35	17,22,28
A3SS569	ENSG00000101040.19_3	ZMYND8	chr20	-	45927472	45927691	45927472	45927616	45976599	45976670	-0.141	0.00342988	0.0436927	0.727,1.0,0.85	1.0,1.0,1.0	224	149	16,9,17	4,0,2	3,7,7	0,0,0
A3SS571	ENSG00000166747.12_3	AP1G1	chr16	-	71823181	71823385	71823181	71823383	71841917	71842053	-0.362	0.0400074	0.256205	0.212,0.198,0.0	0.497,0.0,1.0	151	149	3,1,0	11,4,2	1,0,6	1,2,0
A3SS572	ENSG00000166747.12_3	AP1G1	chr16	-	71841703	71842053	71841703	71841741	71842665	71842716	0.139	1	1	1.0,1.0,1.0	1.0,NA,0.721	461	149	9,2,9	0,0,0	4,0,8	0,0,1
A3SS573	ENSG00000105607.12_3	GCDH	chr19	+	13002300	13002788	13002644	13002788	13002084	13002209	-0.071	0.799872	1	0.824,0.894,1.0	0.93,1.0,1.0	493	149	31,28,29	2,1,0	44,34,43	1,0,0
A3SS574	ENSG00000105607.12_3	GCDH	chr19	+	13007018	13007235	13007053	13007235	13006805	13006935	0.018	0.606487	1	0.926,1.0,0.919	0.975,0.844,0.972	184	149	31,17,14	2,0,1	48,20,43	1,3,1
A3SS575	ENSG00000105607.12_3	GCDH	chr19	+	13008116	13008677	13008516	13008677	13007723	13007827	-0.159	0.0922884	0.452498	0.71,1.0,0.813	1.0,1.0,1.0	549	149	27,8,16	3,0,1	19,24,23	0,0,0
A3SS576	ENSG00000150433.9_2	TMEM218	chr11	-	124971096	124971199	124971096	124971152	124972027	124972213	0.06	0.00975011	0.0944138	1.0,0.908,1.0	0.876,0.884,0.967	196	149	23,13,10	0,1,0	28,30,38	3,3,1
A3SS577	ENSG00000150433.9_2	TMEM218	chr11	-	124972027	124972247	124972027	124972213	124972532	124972705	0.044	0.921108	1	0.494,0.169,0.0	0.263,0.087,0.182	183	149	6,2,0	5,8,5	7,2,3	16,17,11
A3SS580	ENSG00000150433.9_2	TMEM218	chr11	-	124972027	124972247	124972027	124972213	124972629	124972705	-0.056	0.062541	0.348645	0.129,0.1,0.0	0.208,0.067,0.122	183	149	2,3,0	11,22,13	10,3,8	31,34,47
A3SS581	ENSG00000204386.10_2	NEU1	chr6	-	31827818	31828041	31827818	31827955	31828215	31828398	-0.022	0.471177	1	0.994,0.971,0.968	1.0,1.0,1.0	235	149	248,214,188	1,4,4	55,87,65	0,0,0
A3SS582	ENSG00000133624.13_2	ZNF767P	chr7	-	149249891	149250107	149249891	149250104	149255698	149255930	-0.147	0.0224498	0.170436	0.855,0.746,0.821	0.864,1.0,1.0	152	149	6,3,14	1,1,3	13,21,13	2,0,0
A3SS583	ENSG00000125734.15_4	GPR108	chr19	-	6730065	6730395	6730065	6730253	6730997	6731122	-0.008	1	1	0.99,1.0,0.987	1.0,1.0,1.0	291	149	190,172,154	1,0,1	80,118,83	0,0,0
A3SS584	ENSG00000125734.15_4	GPR108	chr19	-	6730997	6731122	6730997	6731065	6731209	6731293	-0.031	0.174125	0.683661	0.868,0.85,0.963	0.925,0.873,0.975	206	149	109,110,107	12,14,3	51,57,53	3,6,1
A3SS585	ENSG00000125734.15_4	GPR108	chr19	-	6731209	6731293	6731209	6731245	6731483	6731533	-0.034	0.00579335	0.0643769	0.971,0.911,0.951	0.975,1.0,0.96	197	149	135,135,102	3,10,4	51,60,63	1,0,2
A3SS587	ENSG00000119760.15_2	SUPT7L	chr2	-	27883850	27884468	27883850	27884255	27885045	27885148	0.145	3.90849e-05	0.00139189	0.322,0.351,0.358	0.206,0.159,0.23	362	149	68,50,65	59,38,48	39,28,45	62,61,62
A3SS589	ENSG00000100211.10_2	CBY1	chr22	+	39066771	39066994	39066888	39066994	39064021	39064137	0.013	0.997936	1	0.028,0.091,0.127	0.049,0.104,0.055	266	149	2,5,7	39,28,27	6,12,7	65,58,67
A3SS591	ENSG00000157470.11_3	FAM81A	chr15	+	59737347	59737461	59737362	59737461	59732153	59732322	0.057	1	1	0.0,NA,0.476	0.0,0.232,0.312	164	149	0,0,1	1,0,1	0,1,4	15,3,8
A3SS592	ENSG00000141449.14_3	GREB1L	chr18	+	18963470	18963636	18963476	18963636	18945987	18946097	-0.017	1	1	0.948,1.0,1.0	1.0,1.0,1.0	155	149	19,5,18	1,0,0	4,2,2	0,0,0
A3SS594	ENSG00000146707.14_4	POMZP3	chr7	-	76240770	76240944	76240770	76240908	76241038	76241130	0.01	1	1	0.029,0.0,0.0	0.0,0.0,0.0	185	149	1,0,0	27,24,12	0,0,0	16,13,22
A3SS595	ENSG00000146707.14_4	POMZP3	chr7	-	76247499	76247932	76247499	76247617	76254838	76255000	-0.074	0.0207693	0.162228	0.138,0.018,0.011	0.129,0.146,0.114	464	149	10,1,1	20,18,28	6,8,6	13,15,15
A3SS596	ENSG00000111206.12_3	FOXM1	chr12	-	2973848	2973921	2973848	2973918	2974520	2974565	-0.068	0.0215657	0.167003	0.153,0.187,0.234	0.259,0.269,0.251	152	149	27,16,30	147,68,96	46,41,39	129,109,114
A3SS597	ENSG00000111206.12_3	FOXM1	chr12	-	2973848	2973921	2973848	2973918	2975558	2975687	-0.01	0.117345	0.52614	0.076,0.092,0.0	0.0,0.197,0.0	152	149	3,3,0	36,29,25	0,2,0	16,8,15
A3SS598	ENSG00000111206.12_3	FOXM1	chr12	-	2981261	2981413	2981261	2981410	2983142	2983691	0.035	0.467488	1	0.595,0.698,0.575	0.515,0.614,0.634	152	149	96,80,65	64,34,47	78,78,99	72,48,56
A3SS599	ENSG00000143801.16_3	PSEN2	chr1	+	227079443	227079545	227079446	227079545	227078978	227079062	-0.015	0.809745	1	0.706,0.741,0.612	0.677,0.682,0.746	152	149	44,38,29	18,13,18	30,35,39	14,16,13
A3SS600	ENSG00000111321.10_2	LTBR	chr12	+	6494187	6494313	6494202	6494313	6493753	6493850	-0.003	0.828903	1	0.958,0.949,0.964	0.97,0.968,0.943	164	149	100,103,59	4,5,2	107,101,91	3,3,5
A3SS601	ENSG00000153391.15_4	INO80C	chr18	-	33067349	33067787	33067349	33067403	33069295	33069349	-0.286	1	1	1.0,NA,0.0	1.0,0.359,1.0	533	149	1,0,0	0,0,1	4,2,6	0,1,0
A3SS606	ENSG00000227954.6_4	TARID	chr6	-	134209741	134210568	134209741	134210350	134212824	134213940	-0.309	1	1	0.0,0.0,NA	0.619,0.0,NA	367	149	0,0,0	2,1,0	4,0,0	1,4,0
A3SS607	ENSG00000120896.13_3	SORBS3	chr8	+	22412375	22412493	22412420	22412493	22411964	22412121	0.241	1	1	NA,NA,1.0	0.277,1.0,1.0	194	149	0,0,1	0,0,0	1,3,1	2,0,0
A3SS608	ENSG00000120896.13_3	SORBS3	chr8	+	22423338	22423997	22423857	22423997	22422780	22422867	-0.271	4.33956e-05	0.00152533	0.575,0.483,0.538	0.862,0.805,0.741	668	149	79,67,73	13,16,14	84,74,90	3,4,7
A3SS612	ENSG00000055609.17_3	KMT2C	chr7	-	151853289	151853431	151853289	151853359	151854845	151855010	0.004	1	1	0.975,1.0,1.0	1.0,1.0,0.962	221	149	58,33,51	1,0,0	35,30,38	0,0,1
A3SS613	ENSG00000055609.17_3	KMT2C	chr7	-	151853289	151853431	151853289	151853359	151855947	151856157	-0.019	1	1	0.944,1.0,1.0	1.0,1.0,1.0	221	149	25,13,22	1,0,0	14,18,22	0,0,0
A3SS614	ENSG00000055609.17_3	KMT2C	chr7	-	152027685	152027827	152027685	152027824	152055671	152055760	0.029	0.218178	0.781081	0.164,0.211,0.082	0.246,0.0,0.123	152	149	1,3,1	5,11,11	2,0,1	6,4,7
A3SS618	ENSG00000187860.10_3	CCDC157	chr22	+	30761932	30762237	30761978	30762237	30757949	30758103	0.08	1	1	0.0,0.16,NA	0.0,0.0,NA	195	149	0,1,0	1,4,0	0,0,0	3,7,0
A3SS620	ENSG00000258388.7_3	PPT2-EGFL8	chr6	+	32134863	32135034	32134879	32135034	32134686	32134782	-0.093	0.773569	1	0.909,0.73,1.0	1.0,1.0,0.919	165	149	11,6,9	1,2,0	26,26,25	0,0,2
A3SS621	ENSG00000174748.18_3	RPL15	chr3	+	23959327	23959522	23959340	23959522	23958294	23958664	0.002	0.270086	0.890363	0.014,0.011,0.013	0.012,0.009,0.01	162	149	36,26,23	2263,2128,1635	15,15,23	1136,1494,2010
A3SS622	ENSG00000180376.16_2	CCDC66	chr3	+	56597679	56598153	56597711	56598153	56593596	56593622	-0.01	1	1	0.015,0.0,0.0	0.02,0.024,0.0	181	149	1,0,0	55,22,51	1,1,0	41,33,52
A3SS623	ENSG00000180376.16_2	CCDC66	chr3	+	56647616	56647778	56647638	56647778	56627971	56628056	0.005	1	1	1.0,1.0,1.0	0.985,1.0,1.0	171	149	41,23,64	0,0,0	76,65,66	1,0,0
A3SS625	ENSG00000063176.15_4	SPHK2	chr19	+	49129147	49129619	49129206	49129619	49123658	49123810	0.045	1	1	1.0,0.962,0.956	1.0,0.782,1.0	208	149	32,35,30	0,1,1	8,5,12	0,1,0
A3SS626	ENSG00000063176.15_4	SPHK2	chr19	+	49129147	49129619	49129324	49129619	49123658	49123810	-0.018	1	1	0.947,1.0,1.0	1.0,1.0,1.0	326	149	39,41,38	1,0,0	9,6,12	0,0,0
A3SS627	ENSG00000063176.15_4	SPHK2	chr19	+	49129206	49129619	49129324	49129619	49123658	49123810	-0.068	1	1	0.796,1.0,1.0	1.0,1.0,NA	267	149	7,7,9	1,0,0	1,2,0	0,0,0
A3SS628	ENSG00000204396.10_2	VWA7	chr6	-	31741018	31741214	31741018	31741098	31742292	31742403	0.077	0.702392	1	1.0,0.83,0.953	1.0,0.835,0.717	265	149	37,26,36	0,3,1	25,18,9	0,2,2
A3SS629	ENSG00000070047.11_2	PHRF1	chr11	+	581961	582081	581964	582081	581491	581606	0.062	0.476041	1	0.528,0.831,0.922	0.727,0.809,0.558	152	149	8,15,12	7,3,1	19,13,9	7,3,7
A3SS630	ENSG00000070047.11_2	PHRF1	chr11	+	605604	605724	605607	605724	605118	605300	0.035	1	1	0.932,1.0,0.922	0.965,0.907,0.878	152	149	14,10,12	1,0,1	28,20,22	1,2,3
A3SS632	ENSG00000135424.15_3	ITGA7	chr12	-	56090682	56090852	56090682	56090834	56090999	56091061	-0.12	1	1	1.0,0.641,1.0	NA,1.0,NA	167	149	8,2,4	0,1,0	0,4,0	0,0,0
A3SS633	ENSG00000154222.14_3	CC2D1B	chr1	-	52822672	52822846	52822672	52822798	52823197	52823370	0.033	1	1	0.0,0.098,0.0	0.0,0.0,0.0	197	149	0,2,0	19,14,10	0,0,0	18,14,12
A3SS634	ENSG00000154222.14_3	CC2D1B	chr1	-	52823452	52823588	52823452	52823570	52824002	52824133	0	0.919903	1	0.075,0.1,0.075	0.078,0.043,0.129	167	149	3,3,3	33,24,33	2,1,5	21,20,30
A3SS635	ENSG00000154222.14_3	CC2D1B	chr1	-	52825376	52825508	52825376	52825492	52825745	52825905	-0.23	0.564669	1	1.0,0.311,1.0	1.0,1.0,1.0	165	149	2,1,7	0,2,0	5,5,1	0,0,0
A3SS636	ENSG00000154222.14_3	CC2D1B	chr1	-	52825376	52825555	52825376	52825492	52825745	52825905	-0.025	1	1	1.0,0.925,1.0	1.0,1.0,1.0	212	149	38,35,40	0,2,0	48,41,37	0,0,0
A3SS637	ENSG00000154222.14_3	CC2D1B	chr1	-	52825376	52825555	52825376	52825508	52825745	52825905	0.009	1	1	0.966,1.0,0.963	1.0,0.935,0.966	196	149	37,34,34	1,0,1	43,38,37	0,2,1
A3SS639	ENSG00000165046.12_3	LETM2	chr8	+	38250059	38250513	38250130	38250513	38245467	38245548	-0.032	0.811091	1	0.753,0.882,1.0	1.0,1.0,0.73	220	149	9,11,10	2,1,0	7,7,8	0,0,2
A3SS640	ENSG00000165046.12_3	LETM2	chr8	+	38251615	38251759	38251700	38251759	38250059	38250513	-0.103	0.578374	1	0.175,0.489,0.389	0.56,0.241,0.56	234	149	1,3,2	3,2,2	2,2,4	1,4,2
A3SS641	ENSG00000113594.9_2	LIFR	chr5	-	38496483	38496697	38496483	38496636	38499614	38499685	0.013	0.304811	0.951274	0.977,0.993,0.994	0.989,0.946,0.991	210	149	303,193,217	5,1,1	129,147,156	1,6,1
A3SS642	ENSG00000111231.8_2	GPN3	chr12	-	110891547	110891676	110891547	110891634	110893390	110893487	0	1	1	1.0,0.995,1.0	1.0,0.996,1.0	191	149	313,241,221	0,1,0	412,349,355	0,1,0
A3SS643	ENSG00000101337.15_3	TM9SF4	chr20	+	30729299	30729468	30729343	30729468	30720815	30720929	0.019	1	1	1.0,1.0,1.0	1.0,1.0,0.944	193	149	20,16,21	0,0,0	24,13,22	0,0,1
A3SS644	ENSG00000101337.15_3	TM9SF4	chr20	+	30729299	30729468	30729343	30729468	30724679	30724800	0.035	1	1	1.0,1.0,1.0	1.0,1.0,0.895	193	149	20,17,21	0,0,0	25,14,22	0,0,2
A3SS648	ENSG00000164985.14_2	PSIP1	chr9	-	15470633	15471309	15470633	15471229	15472629	15472748	0.074	0.00592872	0.0649639	0.101,0.148,0.263	0.101,0.112,0.077	229	149	27,24,39	157,90,71	42,37,31	244,190,243
A3SS658	ENSG00000129255.15_3	MPDU1	chr17	+	7489263	7489396	7489268	7489396	7489049	7489115	-0.001	0.934183	1	0.969,1.0,0.942	0.967,1.0,0.947	154	149	98,83,50	3,0,3	30,38,55	1,0,3
A3SS659	ENSG00000129255.15_3	MPDU1	chr17	+	7489973	7490095	7490009	7490095	7489263	7489396	0.003	0.689001	1	0.029,0.022,0.007	0.034,0.0,0.016	185	149	5,3,1	137,109,107	4,0,2	92,63,97
A3SS661	ENSG00000137171.14_3	KLC4	chr6	+	43030623	43030885	43030654	43030885	43029048	43029331	0.015	1	1	0.028,0.0,0.017	0.0,0.0,0.0	180	149	1,0,1	29,32,48	0,0,0	79,53,57
A3SS662	ENSG00000137171.14_3	KLC4	chr6	+	43030623	43030885	43030720	43030885	43029048	43029331	-0.064	1	1	0.809,1.0,1.0	1.0,1.0,1.0	246	149	7,13,11	1,0,0	10,11,17	0,0,0
A3SS663	ENSG00000137171.14_3	KLC4	chr6	+	43030654	43030885	43030720	43030885	43029048	43029331	-0.013	1	1	0.96,1.0,1.0	1.0,1.0,1.0	215	149	35,45,58	1,0,0	89,64,74	0,0,0
A3SS664	ENSG00000213085.9_3	CFAP45	chr1	-	159846345	159846579	159846345	159846539	159847138	159847252	0.201	1	1	0.073,0.345,0.184	0.0,0.0,NA	189	149	1,2,2	10,3,7	0,0,0	5,1,0
A3SS665	ENSG00000170791.17_3	CHCHD7	chr8	+	57128947	57129065	57128991	57129065	57127156	57127226	0.029	0.233301	0.810043	0.267,0.257,0.269	0.257,0.239,0.21	193	149	140,107,96	297,239,201	64,53,56	143,130,163
A3SS667	ENSG00000143228.12_3	NUF2	chr1	+	163310153	163310216	163310157	163310216	163309170	163309267	0.001	1	1	1.0,0.991,1.0	0.997,0.996,0.996	153	149	325,220,221	0,2,0	294,237,261	1,1,1
A3SS668	ENSG00000100564.8_3	PIGH	chr14	-	68059351	68059435	68059351	68059432	68060459	68060669	0.012	1	1	0.986,0.951,0.978	0.936,1.0,0.943	152	149	71,40,45	1,2,1	15,11,17	1,0,1
A3SS670	ENSG00000120008.15_2	WDR11	chr10	+	122664157	122664323	122664161	122664323	122663558	122663654	0.014	0.51544	1	0.979,1.0,1.0	0.974,0.962,1.0	153	149	48,50,40	1,0,0	77,77,77	2,3,0
A3SS671	ENSG00000120008.15_2	WDR11	chr10	+	122665387	122666367	122666287	122666367	122664830	122664928	0.028	0.500147	1	0.705,0.883,0.839	0.8,0.784,0.76	1049	149	84,106,147	5,2,4	169,128,178	6,5,8
A3SS673	ENSG00000165304.7_3	MELK	chr9	+	36607571	36607670	36607575	36607670	36599390	36599483	-0.005	1	1	1.0,0.985,1.0	1.0,1.0,1.0	153	149	155,138,104	0,2,0	149,127,156	0,0,0
A3SS674	ENSG00000171858.17_2	RPS21	chr20	+	60963364	60963575	60963512	60963575	60962666	60962730	-0.012	1	1	1.0,1.0,0.965	1.0,1.0,1.0	297	149	103,100,109	0,0,2	168,129,156	0,0,0
A3SS675	ENSG00000171858.17_2	RPS21	chr20	+	60963364	60963575	60963512	60963575	60962898	60962970	0	1	1	1.0,1.0,1.0	0.999,1.0,1.0	297	149	6819,7236,6123	0,0,0	7601,7406,7252	3,0,0
A3SS676	ENSG00000198598.6_2	MMP17	chr12	+	132334346	132334604	132334483	132334604	132329841	132329994	-0.433	0.00273613	0.0369344	0.275,0.08,0.281	0.549,0.385,1.0	286	149	8,2,12	11,12,16	7,6,14	3,5,0
A3SS679	ENSG00000125046.14_3	SSUH2	chr3	-	8675351	8676331	8675351	8675627	8676985	8677067	0.1	0.476704	1	1.0,1.0,0.379	1.0,1.0,0.08	853	149	1,2,7	0,0,2	1,1,1	0,0,2
A3SS682	ENSG00000124508.16_3	BTN2A2	chr6	+	26385242	26385590	26385370	26385590	26384019	26384143	0	0.741075	1	0.886,0.7,0.931	0.805,0.922,0.79	277	149	29,13,25	2,3,1	23,22,21	3,1,3
A3SS683	ENSG00000124508.16_3	BTN2A2	chr6	+	26392602	26395102	26394525	26395102	26391030	26391057	-0.005	0.874904	1	0.853,0.855,0.789	0.847,0.762,0.903	2072	149	402,328,364	5,4,7	307,267,259	4,6,2
A3SS685	ENSG00000140688.16_2	C16orf58	chr16	-	31504923	31505108	31504923	31505102	31505186	31505257	-0.011	1	1	0.945,1.0,1.0	1.0,1.0,0.979	155	149	18,20,16	1,0,0	60,24,49	0,0,1
A3SS687	ENSG00000144395.17_3	CCDC150	chr2	+	197593916	197594585	197594516	197594585	197590696	197590823	-0.259	0.0224438	0.170436	0.544,0.415,0.51	0.642,0.603,1.0	749	149	30,25,47	5,7,9	36,61,56	4,8,0
A3SS695	ENSG00000143258.15_3	USP21	chr1	+	161134818	161134933	161134860	161134933	161134624	161134732	-0.01	1	1	0.969,1.0,1.0	1.0,1.0,1.0	191	149	81,69,70	2,0,0	54,42,43	0,0,0
A3SS698	ENSG00000269556.7_4	TMEM185A	chrX	-	148690313	148690521	148690313	148690516	148692969	148693146	0.041	0.0364655	0.239839	0.96,0.981,1.0	0.977,0.89,0.952	154	149	75,54,58	3,1,0	44,42,62	1,5,3
A3SS699	ENSG00000126247.10_4	CAPNS1	chr19	+	36636677	36636776	36636707	36636776	36633965	36634030	0.001	1	1	0.001,0.0,0.002	0.0,0.001,0.0	179	149	1,0,2	1199,1112,876	0,1,0	956,893,986
A3SS703	ENSG00000266173.6_3	STRADA	chr17	-	61781843	61782268	61781843	61781942	61783994	61784099	0.057	0.122237	0.542352	0.025,0.111,0.102	0.032,0.036,0.0	475	149	1,2,4	12,5,11	4,2,0	38,17,20
A3SS708	ENSG00000128944.13_3	KNSTRN	chr15	+	40678562	40678695	40678605	40678695	40675428	40675523	0.015	0.141303	0.59477	0.984,1.0,0.977	0.964,0.983,0.969	192	149	233,156,164	3,0,3	140,151,159	4,2,4
A3SS709	ENSG00000128944.13_3	KNSTRN	chr15	+	40681689	40681812	40681706	40681812	40679359	40679407	0.002	1	1	0.013,0.011,0.004	0.008,0.0,0.015	166	149	4,2,1	266,161,213	2,0,3	215,172,183
A3SS711	ENSG00000095319.14_3	NUP188	chr9	+	131720288	131720333	131720292	131720333	131719230	131719311	0.005	1	1	1.0,1.0,1.0	1.0,0.985,1.0	153	149	114,92,84	0,0,0	94,67,85	0,1,0
A3SS712	ENSG00000095319.14_3	NUP188	chr9	+	131752398	131752505	131752431	131752505	131750325	131750465	0.004	0.650961	1	0.98,0.987,0.96	0.988,0.969,0.958	182	149	181,95,117	3,1,4	97,115,138	1,3,5
A3SS713	ENSG00000056586.15_3	RC3H2	chr9	-	125616809	125616894	125616809	125616860	125617462	125617676	-0.007	1	1	1.0,1.0,0.98	1.0,1.0,1.0	183	149	75,60,61	0,0,1	85,78,92	0,0,0
A3SS714	ENSG00000198157.10_4	HMGN5	chrX	-	80374228	80374279	80374228	80374258	80375286	80375316	-0.028	0.865624	1	0.024,0.0,0.0	0.0,0.0,0.107	170	149	1,0,0	36,16,28	0,0,3	20,20,22
A3SS716	ENSG00000100644.16_3	HIF1A	chr14	+	62187096	62187290	62187099	62187290	62162257	62162557	-0.031	0.469834	1	0.25,0.248,0.226	0.226,0.312,0.28	152	149	90,63,60	264,187,201	37,31,33	124,67,83
A3SS717	ENSG00000135506.15_3	OS9	chr12	+	58109871	58109976	58109874	58109976	58109542	58109753	0.009	0.833046	1	0.346,0.335,0.379	0.458,0.27,0.305	152	149	76,58,58	141,113,93	93,52,61	108,138,136
A3SS722	ENSG00000079459.12_3	FDFT1	chr8	+	11683532	11683724	11683587	11683724	11679258	11679387	-0.001	1	1	0.997,1.0,0.998	0.998,1.0,1.0	204	149	1528,1361,1194	3,0,2	612,684,617	1,0,0
A3SS723	ENSG00000174953.13_4	DHX36	chr3	-	154013072	154013128	154013072	154013086	154017626	154017714	0.003	1	1	1.0,1.0,1.0	0.99,1.0,1.0	191	149	194,139,132	0,0,0	257,218,288	2,0,0
A3SS724	ENSG00000144034.14_2	TPRKB	chr2	-	73961555	73961718	73961555	73961715	73964428	73964527	-0.019	0.525997	1	0.676,0.688,0.749	0.751,0.741,0.679	152	149	247,180,210	116,80,69	200,187,250	65,64,116
A3SS725	ENSG00000197713.14_3	RPE	chr2	+	210884392	210884685	210884396	210884685	210882196	210882283	0.006	0.636531	1	0.991,0.989,0.985	0.981,1.0,0.966	153	149	232,188,198	2,2,3	213,182,177	4,0,6
A3SS727	ENSG00000174233.11_3	ADCY6	chr12	-	49166077	49166207	49166077	49166122	49166290	49166326	0	1	1	0.989,0.984,1.0	0.987,0.986,1.0	234	149	143,98,94	1,1,0	124,111,127	1,1,0
A3SS729	ENSG00000166153.16_3	DEPDC4	chr12	-	100657274	100657671	100657274	100657470	100660697	100660857	0.27	1	1	1.0,1.0,NA	0.561,1.0,0.63	350	149	2,3,0	0,0,0	3,12,4	1,0,1
A3SS732	ENSG00000092068.19_4	SLC7A8	chr14	-	23597227	23597573	23597227	23597405	23598858	23599008	0.004	1	1	0.0,0.0,0.013	0.0,NA,NA	317	149	0,0,1	36,12,37	0,0,0	1,0,0
A3SS734	ENSG00000143951.15_3	WDPCP	chr2	-	63666890	63667005	63666890	63666989	63711737	63711797	-0.175	1	1	0.644,0.475,1.0	1.0,0.644,1.0	165	149	2,1,1	1,1,0	11,2,5	0,1,0
A3SS735	ENSG00000113971.19_3	NPHP3	chr3	-	132411497	132412709	132411497	132411662	132413670	132413809	-0.01	0.715047	1	0.0,0.0,0.02	0.009,0.014,0.028	1196	149	0,0,1	2,8,6	1,1,3	13,9,13
A3SS737	ENSG00000163702.18_3	IL17RC	chr3	+	9959547	9959759	9959606	9959759	9959396	9959418	-0.014	0.836667	1	0.0,0.059,0.061	0.032,0.13,0.0	208	149	0,3,2	32,34,22	1,5,0	22,24,22
A3SS738	ENSG00000163702.18_3	IL17RC	chr3	+	9959547	9959759	9959610	9959759	9959396	9959418	0.131	1	1	1.0,1.0,1.0	0.738,1.0,NA	212	149	1,4,2	0,0,0	4,6,0	1,0,0
A3SS739	ENSG00000163702.18_3	IL17RC	chr3	+	9959606	9959759	9959610	9959759	9959396	9959418	0.013	1	1	1.0,1.0,1.0	0.961,1.0,1.0	153	149	33,35,22	0,0,0	25,25,22	1,0,0
A3SS741	ENSG00000163702.18_3	IL17RC	chr3	+	9971532	9971581	9971535	9971581	9970263	9970314	-0.022	0.607601	1	0.068,0.094,0.084	0.0,0.137,0.175	152	149	2,2,3	27,19,32	0,5,8	46,31,37
A3SS744	ENSG00000115355.15_2	CCDC88A	chr2	-	55555429	55555571	55555429	55555568	55559701	55559829	-0.05	0.0788498	0.407654	0.807,0.748,0.73	0.791,0.781,0.864	152	149	302,124,229	71,41,83	220,149,169	57,41,26
A3SS746	ENSG00000177156.10_2	TALDO1	chr11	+	758949	759057	759008	759057	755878	756002	0.002	0.446779	1	0.987,0.989,0.987	0.982,0.989,0.985	208	149	858,641,617	8,5,6	973,904,976	13,7,11
A3SS747	ENSG00000205531.12_3	NAP1L4	chr11	-	2993331	2993509	2993331	2993473	2997253	2997353	0.065	0	0	0.079,0.109,0.052	0.011,0.008,0.027	185	149	63,63,34	589,413,495	11,7,22	804,707,644
A3SS748	ENSG00000205531.12_3	NAP1L4	chr11	-	3010358	3010501	3010358	3010427	3013458	3013488	0.186	0.000185756	0.00469859	0.93,0.927,0.954	0.735,0.676,0.842	223	149	40,19,31	2,1,1	29,25,24	7,8,3
A3SS750	ENSG00000205517.12_3	RGL3	chr19	-	11510530	11510645	11510530	11510627	11510715	11510784	-0.157	0.400059	1	0.0,0.0,0.0	0.0,0.0,0.472	167	149	0,0,0	4,1,4	0,0,3	6,8,3
A3SS751	ENSG00000205517.12_3	RGL3	chr19	-	11527287	11527341	11527287	11527336	11527509	11527733	-0.039	1	1	0.829,0.795,1.0	1.0,0.871,0.871	154	149	5,4,5	1,1,0	13,7,7	0,1,1
A3SS752	ENSG00000205517.12_3	RGL3	chr19	-	11529346	11529568	11529346	11529460	11529921	11529993	0.153	0.472773	1	0.367,0.367,0.127	0.326,0.076,0.0	257	149	1,1,1	1,1,4	5,2,0	6,14,10
A3SS753	ENSG00000125843.10_3	AP5S1	chr20	+	3804517	3805949	3804521	3805949	3802748	3802940	-0.022	0.205005	0.751824	0.907,1.0,0.773	0.915,0.83,1.0	153	149	10,11,14	1,0,4	22,5,13	2,1,0
A3SS754	ENSG00000123240.16_3	OPTN	chr10	+	13151096	13151288	13151111	13151288	13142172	13142302	0.001	1	1	0.01,0.006,0.0	0.0,0.005,0.009	164	149	3,1,0	260,148,173	0,1,2	177,184,200
A3SS755	ENSG00000123240.16_3	OPTN	chr10	+	13151096	13151288	13151111	13151288	13150961	13151015	-0.155	0.0167156	0.139632	0.214,0.267,0.232	0.476,0.414,0.288	164	149	12,8,11	40,20,33	17,14,8	17,18,18
A3SS756	ENSG00000123240.16_3	OPTN	chr10	+	13152179	13152476	13152273	13152476	13151111	13151288	0.005	0.592548	1	0.008,0.028,0.013	0.019,0.011,0.004	243	149	4,8,5	303,170,233	9,4,2	292,225,278
A3SS757	ENSG00000123240.16_3	OPTN	chr10	+	13160887	13161040	13160905	13161040	13158266	13158340	-0.046	0.0436883	0.26996	0.796,0.787,0.729	0.807,0.84,0.804	167	149	349,245,232	80,59,77	286,307,221	61,52,48
A3SS758	ENSG00000102854.15_3	MSLN	chr16	+	816643	816810	816667	816810	816334	816490	-0.021	0.0598106	0.338655	0.065,0.065,0.05	0.097,0.064,0.082	173	149	25,25,17	310,310,278	50,27,31	401,338,299
A3SS759	ENSG00000139697.13_1	SBNO1	chr12	-	123829804	123830117	123829804	123830114	123832575	123832680	0.051	0.451727	1	0.46,0.495,0.445	0.436,0.378,0.434	152	149	33,20,27	38,20,33	15,13,18	19,21,23
A3SS760	ENSG00000139697.13_1	SBNO1	chr12	-	123829804	123830117	123829804	123830114	123834856	123834988	-0.32	0.00408867	0.0499592	0.71,0.329,1.0	1.0,1.0,1.0	152	149	10,1,7	4,2,0	2,2,1	0,0,0
A3SS761	ENSG00000175354.18_3	PTPN2	chr18	-	12817154	12817364	12817154	12817264	12825808	12825943	0.001	1	1	0.994,1.0,0.988	0.995,0.995,0.99	249	149	274,244,267	1,0,2	303,316,326	1,1,2
A3SS763	ENSG00000186017.14_3	ZNF566	chr19	-	36963812	36963911	36963812	36963908	36964233	36964360	-0.139	0.072284	0.386634	0.112,0.224,0.14	0.246,0.214,0.433	152	149	4,5,4	31,17,24	4,5,7	12,18,9
A3SS765	ENSG00000122644.12_3	ARL4A	chr7	+	12727790	12728801	12727793	12728801	12726532	12726668	-0.032	0.489474	1	0.698,0.722,0.682	0.697,0.797,0.704	152	149	92,61,94	39,23,43	47,36,46	20,9,19
A3SS767	ENSG00000161249.20_4	DMKN	chr19	-	35996840	35996951	35996840	35996888	36001085	36001154	0.004	0.645323	1	0.023,0.01,0.036	0.027,0.015,0.014	212	149	10,4,11	295,292,206	11,6,6	275,275,288
A3SS769	ENSG00000128059.8_2	PPAT	chr4	-	57272660	57272867	57272660	57272784	57273815	57273882	-0.027	0.613018	1	0.907,0.916,0.826	0.94,0.953,0.837	232	149	91,68,59	6,4,8	73,63,80	3,2,10
A3SS770	ENSG00000155329.11_2	ZCCHC10	chr5	-	132335823	132335893	132335823	132335865	132342450	132342612	0.087	0.00738377	0.0777595	0.1,0.24,0.104	0.044,0.047,0.093	177	149	10,15,7	76,40,51	3,2,6	55,34,49
A3SS771	ENSG00000147421.17_3	HMBOX1	chr8	+	28906470	28906565	28906473	28906565	28904874	28904970	-0.041	0.633963	1	0.651,0.756,0.718	0.718,0.674,0.855	152	149	19,19,26	10,6,10	26,19,18	10,9,3
A3SS772	ENSG00000036549.12_3	ZZZ3	chr1	-	78047460	78047576	78047460	78047573	78047663	78047811	0.01	0.76856	1	0.65,0.68,0.595	0.609,0.618,0.669	152	149	55,52,42	29,24,28	73,66,66	46,40,32
A3SS775	ENSG00000067365.14_3	METTL22	chr16	+	8722586	8722967	8722756	8722967	8719352	8719655	0.04	0.38879	1	1.0,1.0,1.0	1.0,0.95,0.93	319	149	44,41,42	0,0,0	55,41,85	0,1,3
A3SS776	ENSG00000067365.14_3	METTL22	chr16	+	8738385	8738582	8738413	8738582	8736319	8736422	0.051	0.65047	1	0.0,0.0,0.345	0.047,0.0,0.144	177	149	0,0,5	15,4,8	2,0,3	34,17,15
A3SS777	ENSG00000130332.14_3	LSM7	chr19	-	2324123	2324195	2324123	2324191	2328385	2328476	-0.004	0.862546	1	0.73,0.735,0.726	0.728,0.742,0.732	153	149	679,564,506	245,198,186	401,522,655	146,177,234
A3SS784	ENSG00000049246.14_2	PER3	chr1	+	7854016	7854068	7854019	7854068	7848104	7848306	0.221	1	1	1.0,NA,1.0	0.94,0.541,0.855	152	149	3,0,10	0,0,0	16,6,6	1,5,1
A3SS785	ENSG00000049246.14_2	PER3	chr1	+	7889893	7890221	7889896	7890221	7887177	7887875	-0.322	1	1	0.14,NA,0.0	0.471,0.211,0.495	152	149	1,0,0	6,0,8	10,3,8	11,11,8
A3SS786	ENSG00000100796.17_2	PPP4R3A	chr14	-	91928392	91928583	91928392	91928565	91929078	91929221	0.008	0.572921	1	0.943,0.966,0.976	0.945,0.939,0.976	167	149	240,190,180	13,6,4	213,190,182	11,11,4
A3SS789	ENSG00000105171.9_2	POP4	chr19	+	30101226	30101539	30101315	30101539	30099563	30099616	0.003	1	1	0.006,0.004,0.017	0.007,0.0,0.011	238	149	2,1,4	205,164,141	2,0,4	169,148,217
A3SS791	ENSG00000171608.15_2	PIK3CD	chr1	+	9777016	9777166	9777121	9777166	9776497	9776677	0.023	1	1	1.0,1.0,1.0	1.0,0.931,1.0	254	149	45,45,25	0,0,0	19,23,21	0,1,0
A3SS792	ENSG00000171608.15_2	PIK3CD	chr1	+	9780491	9780719	9780668	9780719	9780169	9780300	-0.03	0.737479	1	0.012,0.054,0.056	0.0,0.042,0.169	326	149	1,3,3	38,24,23	0,2,4	24,21,9
A3SS793	ENSG00000142082.14_4	SIRT3	chr11	-	230451	230641	230451	230552	232982	233215	0.023	1	1	0.0,0.111,0.0	0.043,0.0,0.0	238	149	0,1,0	11,5,11	1,0,0	14,11,19
A3SS794	ENSG00000175792.11_3	RUVBL1	chr3	-	127806548	127806687	127806548	127806651	127816142	127816341	0.022	0.00343859	0.0436927	0.033,0.049,0.03	0.009,0.019,0.017	185	149	10,12,8	238,187,208	3,6,6	261,243,275
A3SS795	ENSG00000255152.8_3	MSH5-SAPCD1	chr6	+	31729526	31729642	31729594	31729642	31729248	31729392	0.092	0.428238	1	0.407,0.103,0.0	0.032,0.128,0.073	217	149	2,1,0	2,6,3	1,3,3	21,14,26
A3SS796	ENSG00000087053.18_2	MTMR2	chr11	-	95620775	95620923	95620775	95620848	95621319	95621425	-0.025	0.261447	0.871437	0.032,0.0,0.034	0.053,0.087,0.0	224	149	2,0,1	40,39,19	2,3,0	24,21,19
A3SS798	ENSG00000198612.10_2	COPS8	chr2	+	238002305	238002840	238002732	238002840	237997247	237997296	-0.101	0.0525836	0.307713	0.134,0.045,0.071	0.266,0.134,0.152	576	149	6,2,5	10,11,17	7,3,9	5,5,13
A3SS799	ENSG00000198612.10_2	COPS8	chr2	+	238002305	238002840	238002732	238002840	237998504	237998637	-0.012	0.0424193	0.26423	0.013,0.006,0.017	0.024,0.017,0.03	576	149	6,2,6	120,87,88	6,5,11	62,74,92
A3SS801	ENSG00000172432.18_3	GTPBP2	chr6	-	43593962	43594147	43593962	43594123	43594658	43594685	0.002	1	1	1.0,1.0,1.0	1.0,1.0,0.994	173	149	87,70,67	0,0,0	170,138,203	0,0,1
A3SS805	ENSG00000172466.15_3	ZNF24	chr18	-	32912190	32919037	32912190	32917734	32919792	32919940	-0.019	8.22405e-08	6.64429e-06	0.006,0.003,0.009	0.025,0.026,0.025	1452	149	7,3,11	118,114,126	40,23,32	161,88,129
A3SS806	ENSG00000140264.19_4	SERF2	chr15	+	44085884	44086244	44085907	44086244	44085172	44085281	0.008	0.00202389	0.0295292	0.018,0.014,0.013	0.007,0.004,0.01	172	149	57,36,36	2658,2223,2279	21,11,29	2470,2517,2384
A3SS807	ENSG00000140264.19_4	SERF2	chr15	+	44091066	44091305	44091141	44091305	44085172	44085281	-0.06	0.310059	0.962907	0.0,1.0,1.0	0.181,1.0,1.0	224	149	0,1,2	1,0,0	1,1,1	3,0,0
A3SS809	ENSG00000213654.9_3	GPSM3	chr6	-	32159485	32159685	32159485	32159647	32159924	32160027	0.099	1	1	1.0,1.0,0.912	0.614,1.0,1.0	187	149	20,11,13	0,0,1	2,4,8	1,0,0
A3SS810	ENSG00000129636.12_3	ITFG1	chr16	-	47192783	47192901	47192783	47192845	47195660	47195743	0.004	1	1	1.0,1.0,1.0	1.0,0.989,1.0	205	149	189,140,138	0,0,0	167,123,132	0,1,0
A3SS811	ENSG00000129636.12_3	ITFG1	chr16	-	47196450	47196575	47196450	47196512	47252778	47252857	-0.027	0.0183042	0.14877	0.963,0.986,0.94	0.982,1.0,0.989	212	149	184,101,111	5,1,5	158,118,132	2,0,1
A3SS812	ENSG00000167526.13_2	RPL13	chr16	+	89627634	89628159	89628003	89628159	89627347	89627471	-0.007	0.371655	1	0.954,0.934,0.942	0.957,0.955,0.939	518	149	3421,3497,2743	47,71,49	3244,3381,4001	42,46,75
A3SS813	ENSG00000145916.18_2	RMND5B	chr5	+	177569583	177569729	177569633	177569729	177565108	177565259	-0.018	1	1	1.0,1.0,0.947	1.0,1.0,1.0	199	149	17,22,24	0,0,1	26,21,27	0,0,0
A3SS814	ENSG00000101752.11_2	MIB1	chr18	+	19371295	19371518	19371334	19371518	19359441	19359646	0.151	0.0128404	0.113756	0.359,0.199,0.284	0.147,0.085,0.157	188	149	12,5,7	17,16,14	5,2,4	23,17,17
A3SS815	ENSG00000011021.21_3	CLCN6	chr1	+	11887145	11887278	11887171	11887278	11886212	11886271	0.114	0.203134	0.746987	1.0,1.0,1.0	0.923,0.911,0.824	175	149	26,8,12	0,0,0	14,12,11	1,1,2
A3SS817	ENSG00000114770.16_2	ABCC5	chr3	-	183703091	183703243	183703091	183703166	183705557	183705705	-0.347	0.000560304	0.0113593	0.0,0.0,0.292	0.468,0.397,0.468	226	149	0,0,5	8,19,8	4,2,4	3,2,3
A3SS818	ENSG00000187607.15_3	ZNF286A	chr17	+	15603361	15603680	15603448	15603680	15602890	15603091	0.033	0.618908	1	0.549,0.558,0.645	0.387,0.612,0.654	236	149	27,8,23	14,4,8	10,10,9	10,4,3
A3SS819	ENSG00000187607.15_3	ZNF286A	chr17	+	15619313	15624101	15619372	15624101	15611468	15611561	-0.101	0.169376	0.671187	0.518,0.619,0.499	0.56,0.608,0.77	208	149	27,25,25	18,11,18	16,26,28	9,12,6
A3SS820	ENSG00000111364.15_2	DDX55	chr12	+	124090477	124090706	124090619	124090706	124086645	124086803	-0.028	1	1	1.0,1.0,0.915	1.0,1.0,1.0	291	149	25,15,21	0,0,1	28,28,29	0,0,0
A3SS821	ENSG00000111364.15_2	DDX55	chr12	+	124090411	124090528	124090477	124090528	124086674	124086803	-0.009	0.192051	0.723937	0.027,0.085,0.0	0.047,0.047,0.046	215	149	1,2,0	25,15,21	2,2,2	28,28,29
A3SS822	ENSG00000111364.15_2	DDX55	chr12	+	124091978	124093376	124093226	124093376	124090619	124090706	-0.028	1	1	0.916,1.0,1.0	1.0,1.0,1.0	1397	149	102,66,79	1,0,0	124,99,114	0,0,0
A3SS823	ENSG00000111364.15_2	DDX55	chr12	+	124092146	124092209	124092150	124092209	124091978	124092070	-0.009	1	1	1.0,0.981,0.979	1.0,1.0,0.986	153	149	70,53,47	0,1,1	73,62,75	0,0,1
A3SS824	ENSG00000111364.15_2	DDX55	chr12	+	124094485	124094675	124094549	124094675	124093226	124093376	0.001	0.767125	1	0.95,0.951,0.922	0.904,0.962,0.953	213	149	108,112,118	4,4,7	176,144,115	13,4,4
A3SS826	ENSG00000068097.14_3	HEATR6	chr17	-	58123385	58123590	58123385	58123460	58124669	58124766	-0.121	8.01966e-06	0.000341814	0.897,0.884,0.813	0.981,1.0,0.976	279	149	49,43,57	3,3,7	96,90,76	1,0,1
A3SS829	ENSG00000109814.11_3	UGDH	chr4	-	39515702	39515804	39515702	39515800	39522970	39523139	0.006	1	1	1.0,0.997,1.0	0.997,0.993,0.988	153	149	448,364,367	0,1,0	316,290,253	1,2,3
A3SS830	ENSG00000109814.11_3	UGDH	chr4	-	39522970	39523164	39522970	39523139	39528902	39529057	-0.001	1	1	0.003,0.003,0.0	0.008,0.0,0.0	174	149	1,1,0	308,250,279	2,0,0	211,189,177
A3SS832	ENSG00000099622.13_3	CIRBP	chr19	+	1270865	1271035	1270926	1271035	1269329	1269409	-0.015	0.855485	1	0.606,0.832,1.0	0.786,0.807,0.891	210	149	13,7,6	6,1,0	57,59,92	11,10,8
A3SS833	ENSG00000099622.13_3	CIRBP	chr19	+	1271138	1271466	1271327	1271466	1270865	1271035	-0.016	1	1	1.0,1.0,0.953	1.0,1.0,1.0	338	149	137,74,91	0,0,2	591,488,492	0,0,0
A3SS834	ENSG00000099622.13_3	CIRBP	chr19	+	1271119	1271245	1271138	1271245	1270926	1271035	0.004	1	1	0.013,0.0,0.0	0.002,0.0,0.0	168	149	2,0,0	137,74,90	1,0,0	583,485,486
A3SS837	ENSG00000137166.14_2	FOXP4	chr6	+	41553168	41553255	41553174	41553255	41552506	41552629	0.084	1	1	1.0,1.0,1.0	0.852,1.0,0.896	155	149	17,13,17	0,0,0	6,6,9	1,0,1
A3SS838	ENSG00000137166.14_2	FOXP4	chr6	+	41555036	41555250	41555039	41555250	41554746	41554894	-0.219	0.000291102	0.00682137	0.864,0.769,0.528	1.0,0.932,0.887	152	149	13,17,8	2,5,7	17,14,16	0,1,2
A3SS839	ENSG00000137166.14_2	FOXP4	chr6	+	41557700	41557908	41557736	41557908	41557508	41557592	-0.078	0.380488	1	0.521,0.207,0.155	0.237,0.446,0.434	185	149	23,11,5	17,34,22	10,14,20	26,14,21
A3SS841	ENSG00000115268.9_4	RPS15	chr19	+	1439604	1439825	1439714	1439825	1438805	1438891	0.126	1	1	1.0,0.943,1.0	0.742,1.0,0.822	259	149	13,29,15	0,1,0	5,15,8	1,0,1
A3SS842	ENSG00000115268.9_4	RPS15	chr19	+	1439959	1440252	1439966	1440252	1438805	1438891	-0.059	1	1	0.875,0.353,0.589	NA,0.741,0.589	156	149	22,8,9	3,14,6	0,3,3	0,1,2
A3SS843	ENSG00000115268.9_4	RPS15	chr19	+	1439959	1440252	1440017	1440252	1438805	1438891	0.003	1	1	0.005,0.002,0.003	0.0,0.001,0.001	207	149	24,11,12	3366,3265,2736	1,4,4	2429,2581,3176
A3SS844	ENSG00000115268.9_4	RPS15	chr19	+	1439959	1440252	1440024	1440252	1438805	1438891	0.03	0.547175	1	0.704,0.651,0.781	0.693,0.736,0.616	214	149	89,83,82	26,31,16	94,72,69	29,18,30
A3SS845	ENSG00000115268.9_4	RPS15	chr19	+	1439966	1440252	1440017	1440252	1438805	1438891	0.002	1	1	0.001,0.004,0.002	0.0,0.001,0.001	200	149	5,17,9	3366,3265,2736	1,2,3	2429,2581,3176
A3SS846	ENSG00000115268.9_4	RPS15	chr19	+	1439966	1440252	1440024	1440252	1438805	1438891	0.019	0.711815	1	0.66,0.674,0.78	0.7,0.737,0.62	207	149	70,89,79	26,31,16	94,70,68	29,18,30
A3SS847	ENSG00000115268.9_4	RPS15	chr19	+	1440017	1440252	1440024	1440252	1438805	1438891	0.002	1	1	0.992,0.99,0.994	0.988,0.993,0.99	156	149	3431,3337,2806	26,31,16	2522,2649,3241	29,18,30
A3SS848	ENSG00000124535.15_2	WRNIP1	chr6	+	2770353	2770595	2770428	2770595	2768924	2769116	-0.024	0.0223006	0.170436	0.947,0.929,0.966	0.984,0.95,0.979	224	149	378,277,253	14,14,6	277,255,286	3,9,4
A3SS849	ENSG00000025770.18_2	NCAPH2	chr22	+	50960926	50960998	50960929	50960998	50960771	50960844	0.03	0.237323	0.818755	0.171,0.094,0.165	0.115,0.105,0.12	152	149	19,9,18	90,85,89	21,16,15	159,133,108
A3SS852	ENSG00000225241.3	RP11-640M9.2	chr1	+	144604409	144604508	144604477	144604508	144598511	144598780	0.027	0.818106	1	0.805,1.0,0.685	0.831,0.767,0.81	217	149	18,14,19	3,0,6	50,24,56	7,5,9
A3SS853	ENSG00000225241.3	RP11-640M9.2	chr1	+	144606837	144607061	144606937	144607061	144606368	144606510	-0.064	1	1	0.807,1.0,1.0	1.0,1.0,1.0	249	149	7,9,7	1,0,0	14,8,21	0,0,0
A3SS854	ENSG00000164024.11_1	METAP1	chr4	+	99955380	99955493	99955383	99955493	99950017	99950069	-0.011	0.256799	0.860181	0.974,0.951,0.992	0.984,0.984,0.982	152	149	154,99,133	4,5,1	129,127,114	2,2,2
A3SS857	ENSG00000221978.11_2	CCNL2	chr1	-	1326145	1326955	1326145	1326245	1328169	1328183	-0.107	0.00162749	0.0256093	0.8,0.801,0.924	0.929,0.967,0.951	859	149	277,116,421	12,5,6	599,501,554	8,3,5
A3SS858	ENSG00000221978.11_2	CCNL2	chr1	-	1326145	1328183	1326145	1326245	1328775	1328840	-0.143	0.0105959	0.0999247	0.754,0.57,0.907	0.875,0.854,0.93	2087	149	602,297,820	14,16,6	1372,1149,1305	14,14,7
A3SS859	ENSG00000125743.10_2	SNRPD2	chr19	-	46191644	46191824	46191644	46191724	46195144	46195175	0	1	1	0.995,0.999,0.997	0.996,0.996,0.999	249	149	2488,2093,2045	7,1,4	1783,1981,2444	4,5,1
A3SS861	ENSG00000176444.18_2	CLK2	chr1	-	155238498	155238586	155238498	155238583	155239278	155239504	0.017	0.589998	1	0.717,0.79,0.746	0.677,0.772,0.752	152	149	44,50,45	17,13,15	75,62,68	35,18,22
A3SS862	ENSG00000176444.18_2	CLK2	chr1	-	155239278	155239507	155239278	155239504	155240598	155240768	-0.127	0.00123534	0.0207667	0.617,0.564,0.565	0.745,0.688,0.695	152	149	46,58,57	28,44,43	128,101,100	43,45,43
A3SS866	ENSG00000160408.14_3	ST6GALNAC6	chr9	-	130647600	130649067	130647600	130649063	130649762	130649870	0.006	0.740662	1	0.939,0.875,0.977	0.926,0.897,0.949	153	149	314,208,266	20,29,6	128,134,152	10,15,8
A3SS867	ENSG00000160408.14_3	ST6GALNAC6	chr9	-	130647600	130649067	130647600	130649063	130652915	130653322	-0.169	1	1	1.0,NA,0.661	1.0,NA,NA	153	149	2,0,2	0,0,1	1,0,0	0,0,0
A3SS868	ENSG00000160408.14_3	ST6GALNAC6	chr9	-	130656790	130656970	130656790	130656908	130658520	130658611	-0.068	0.00120525	0.0203875	0.899,0.863,0.882	0.934,0.984,0.931	211	149	228,178,201	18,20,19	80,86,96	4,1,5
A3SS874	ENSG00000114107.8_4	CEP70	chr3	-	138291700	138291774	138291700	138291756	138310695	138310798	0.016	0.609381	1	0.941,0.885,0.954	0.905,0.952,0.875	167	149	71,43,46	4,5,2	32,44,47	3,2,6
A3SS875	ENSG00000114107.8_4	CEP70	chr3	-	138291700	138291826	138291700	138291756	138310695	138310798	0.073	0.0245323	0.182268	0.967,0.937,0.977	0.888,0.939,0.836	219	149	171,110,123	4,5,2	35,45,45	3,2,6
A3SS876	ENSG00000114107.8_4	CEP70	chr3	-	138291700	138291826	138291700	138291774	138310695	138310798	0.247	3.72555e-08	3.25264e-06	0.664,0.688,0.684	0.451,0.431,0.413	201	149	160,101,117	60,34,40	31,43,37	28,42,39
A3SS877	ENSG00000240344.8_2	PPIL3	chr2	-	201747064	201747158	201747064	201747105	201750420	201750495	0	1	1	0.989,0.994,0.987	0.977,1.0,0.993	202	149	250,212,206	2,1,2	176,124,206	3,0,1
A3SS879	ENSG00000166783.21_4	MARF1	chr16	-	15716790	15716980	15716790	15716914	15718625	15718784	-0.069	1	1	1.0,0.792,1.0	1.0,1.0,1.0	215	149	14,11,12	0,2,0	20,17,28	0,0,0
A3SS880	ENSG00000166783.21_4	MARF1	chr16	-	15716790	15716983	15716790	15716914	15718625	15718784	-0.052	1	1	1.0,0.845,1.0	1.0,1.0,1.0	218	149	8,16,2	0,2,0	10,8,11	0,0,0
A3SS881	ENSG00000166783.21_4	MARF1	chr16	-	15716790	15716983	15716790	15716980	15718625	15718784	0.128	0.364831	1	0.197,0.662,0.082	0.246,0.259,0.052	152	149	2,10,1	8,5,11	5,5,1	15,14,18
A3SS882	ENSG00000166783.21_4	MARF1	chr16	-	15716790	15716983	15716790	15716980	15718872	15719030	0.5	1	1	NA,0.0,1.0	NA,NA,0.0	152	149	0,0,1	0,1,0	0,0,0	0,0,2
A3SS883	ENSG00000166783.21_4	MARF1	chr16	-	15719228	15719657	15719228	15719654	15724188	15724361	-0.061	0.725914	1	0.683,0.887,0.314	0.855,0.407,0.806	152	149	11,16,7	5,2,15	6,7,17	1,10,4
A3SS884	ENSG00000166783.21_4	MARF1	chr16	-	15727473	15727700	15727473	15727691	15728613	15728788	-0.03	1	1	1.0,1.0,0.838	0.927,1.0,1.0	158	149	15,21,11	0,0,2	27,14,20	2,0,0
A3SS885	ENSG00000166783.21_4	MARF1	chr16	-	15727473	15727700	15727473	15727691	15729512	15730199	-0.172	1	1	1.0,0.485,1.0	1.0,1.0,1.0	158	149	10,1,6	0,1,0	2,1,2	0,0,0
A3SS886	ENSG00000138036.18_2	DYNC2LI1	chr2	+	44023025	44023097	44023028	44023097	44021595	44021782	-0.034	0.763502	1	0.515,0.576,0.469	0.436,0.686,0.541	152	149	26,18,9	24,13,10	26,29,24	33,13,20
A3SS887	ENSG00000070413.19_3	DGCR2	chr22	-	19052360	19052580	19052360	19052571	19055612	19055738	0.13	0.063881	0.354654	0.586,0.838,1.0	0.825,0.535,0.675	158	149	6,11,15	4,2,0	10,11,11	2,9,5
A3SS889	ENSG00000167118.10_2	URM1	chr9	+	131140273	131140385	131140314	131140385	131133639	131133694	-0.009	0.413847	1	0.049,0.037,0.079	0.058,0.1,0.035	190	149	12,7,14	183,142,128	13,29,11	167,204,236
A3SS892	ENSG00000091073.19_3	DTX2	chr7	+	76106259	76106495	76106430	76106495	76092861	76093026	0.262	0.00269206	0.0364303	0.583,0.318,1.0	0.736,0.189,0.189	320	149	3,1,5	1,1,0	6,2,1	1,4,2
A3SS893	ENSG00000213930.11_3	GALT	chr9	+	34647471	34647564	34647488	34647564	34647085	34647255	0.024	0.585171	1	0.121,0.07,0.0	0.052,0.031,0.036	166	149	2,1,0	13,12,9	2,1,1	33,28,24
A3SS894	ENSG00000213930.11_3	GALT	chr9	+	34647471	34647564	34647537	34647564	34647085	34647255	0.14	0.0223266	0.170436	1.0,0.874,0.708	1.0,0.581,0.581	215	149	9,10,7	0,1,2	8,6,6	0,3,3
A3SS895	ENSG00000213930.11_3	GALT	chr9	+	34647488	34647564	34647537	34647564	34647085	34647255	0.009	0.24108	0.826641	1.0,0.94,0.858	1.0,0.892,0.879	198	149	20,21,16	0,1,2	39,33,29	0,3,3
A3SS896	ENSG00000213930.11_3	GALT	chr9	+	34647488	34647958	34647828	34647958	34647085	34647255	0.033	1	1	1.0,1.0,1.0	1.0,0.901,1.0	489	149	13,13,14	0,0,0	42,30,26	0,1,0
A3SS897	ENSG00000213930.11_3	GALT	chr9	+	34647537	34648168	34648044	34648168	34647085	34647255	-0.212	1	1	NA,1.0,0.577	1.0,1.0,1.0	656	149	0,1,6	0,0,1	5,4,4	0,0,0
A3SS900	ENSG00000213930.11_3	GALT	chr9	+	34648044	34648168	34648111	34648168	34647653	34647958	-0.049	0.0528052	0.308011	0.075,0.0,0.029	0.084,0.0,0.167	216	149	2,0,1	17,7,23	2,0,7	15,17,24
A3SS901	ENSG00000213930.11_3	GALT	chr9	+	34648044	34648168	34648088	34648168	34647828	34647958	0.464	1	1	1.0,NA,1.0	0.607,0.0,1.0	193	149	2,0,1	0,0,0	2,0,6	1,1,0
A3SS902	ENSG00000213930.11_3	GALT	chr9	+	34648088	34648168	34648111	34648168	34647828	34647958	-0.046	0.303831	0.950657	0.0,0.0,0.0	0.055,0.048,0.035	172	149	0,0,0	17,7,23	1,1,1	15,17,24
A3SS904	ENSG00000093144.18_3	ECHDC1	chr6	-	127637078	127637226	127637078	127637119	127637594	127637647	-0.233	0.000356883	0.00801579	0.28,0.0,0.0	0.318,0.437,0.225	256	149	2,0,0	3,4,9	4,4,1	5,3,2
A3SS905	ENSG00000134744.13_3	ZCCHC11	chr1	-	52902426	52902647	52902426	52902635	52903891	52904007	0.066	0.156173	0.636568	0.288,0.206,0.301	0.295,0.169,0.134	161	149	28,14,20	64,50,43	51,18,16	113,82,96
A3SS906	ENSG00000134744.13_3	ZCCHC11	chr1	-	52902426	52902650	52902426	52902635	52903891	52904007	0.089	0.0991626	0.475015	0.443,0.337,0.537	0.4,0.333,0.317	164	149	56,28,55	64,50,43	83,45,49	113,82,96
A3SS907	ENSG00000134744.13_3	ZCCHC11	chr1	-	52902426	52902650	52902426	52902647	52903891	52904007	-0.015	0.924328	1	0.671,0.671,0.743	0.62,0.725,0.786	152	149	54,27,53	26,13,18	80,43,45	48,16,12
A3SS908	ENSG00000196576.14_2	PLXNB2	chr22	-	50722560	50722673	50722560	50722642	50723001	50723094	0.011	0.738582	1	0.077,0.05,0.04	0.042,0.035,0.058	180	149	7,4,3	69,63,60	8,6,10	150,137,135
A3SS909	ENSG00000103942.12_3	HOMER2	chr15	-	83527780	83527920	83527780	83527887	83532918	83533011	0.262	1.40029e-06	7.65633e-05	0.396,0.28,0.389	0.076,0.025,0.179	182	149	12,10,14	15,21,18	3,1,4	30,32,15
A3SS910	ENSG00000103942.12_3	HOMER2	chr15	-	83527780	83527938	83527780	83527887	83532918	83533011	0.047	0.0398148	0.255352	0.09,0.096,0.11	0.024,0.0,0.13	200	149	2,3,3	15,21,18	1,0,3	30,32,15
A3SS912	ENSG00000138760.9_2	SCARB2	chr4	-	77100669	77100858	77100669	77100848	77102106	77102254	0.009	1	1	0.993,0.994,1.0	0.982,0.989,0.988	159	149	155,167,117	1,1,0	114,95,87	2,1,1
A3SS913	ENSG00000138760.9_2	SCARB2	chr4	-	77100669	77100924	77100669	77100848	77102106	77102254	0.069	1	1	0.879,0.909,1.0	0.869,0.856,0.856	225	149	11,15,12	1,1,0	20,9,9	2,1,1
A3SS914	ENSG00000138760.9_2	SCARB2	chr4	-	77100669	77100924	77100669	77100858	77102106	77102254	-0.002	1	1	0.0,0.0,0.0	0.007,0.0,0.0	215	149	0,0,0	144,152,105	1,0,0	95,86,78
A3SS915	ENSG00000138760.9_2	SCARB2	chr4	-	77102106	77102254	77102106	77102245	77116859	77117017	-0.001	0.903646	1	0.966,0.981,0.969	1.0,0.955,0.963	158	149	243,222,199	8,4,6	131,134,165	0,6,6
A3SS916	ENSG00000216937.13_2	CCDC7	chr10	+	33017814	33017925	33017859	33017925	33015661	33015760	-0.04	1	1	0.658,NA,1.0	1.0,0.606,1.0	194	149	5,0,1	2,0,0	1,2,3	0,1,0
A3SS917	ENSG00000071537.13_3	SEL1L	chr14	-	81972417	81972585	81972417	81972522	81993076	81993308	-0.002	1	1	1.0,1.0,0.955	1.0,0.96,1.0	212	149	74,52,61	0,0,2	80,68,60	0,2,0
A3SS918	ENSG00000112237.12_2	CCNC	chr6	-	99997383	99997451	99997383	99997448	99998093	99998185	-0.005	1	1	0.992,0.985,1.0	1.0,1.0,0.991	152	149	127,130,131	1,2,0	142,143,109	0,0,1
A3SS919	ENSG00000048052.21_3	HDAC9	chr7	+	18629958	18630109	18629967	18630109	18624903	18625145	0.074	1	1	0.904,NA,0.85	0.759,0.767,0.883	158	149	10,0,6	1,0,1	10,7,8	3,2,1
A3SS921	ENSG00000070669.16_3	ASNS	chr7	-	97483891	97484066	97483891	97483992	97484664	97484771	-0.016	0.000361971	0.00804228	0.018,0.004,0.015	0.025,0.031,0.028	223	149	9,2,6	332,340,271	22,24,26	574,505,607
A3SS922	ENSG00000070669.16_3	ASNS	chr7	-	97498219	97498491	97498219	97498417	97499089	97499125	0.004	1	1	1.0,0.996,1.0	0.993,1.0,0.992	223	149	317,348,246	0,1,0	412,417,588	2,0,3
A3SS937	ENSG00000163161.12_2	ERCC3	chr2	-	128046912	128047095	128046912	128047077	128047264	128047400	0.035	0.00157716	0.0251094	0.067,0.086,0.059	0.036,0.053,0.017	167	149	20,20,15	250,189,215	13,14,5	309,225,262
A3SS938	ENSG00000163161.12_2	ERCC3	chr2	-	128050185	128050422	128050185	128050280	128051088	128051294	0.013	0.189434	0.716278	0.971,0.987,0.992	0.972,0.983,0.955	291	149	323,289,249	5,2,1	269,225,248	4,2,6
A3SS939	ENSG00000122218.14_2	COPA	chr1	-	160275222	160275388	160275222	160275361	160275477	160275563	0	0.917655	1	0.041,0.031,0.024	0.037,0.036,0.023	176	149	15,8,6	299,215,206	25,25,16	547,565,565
A3SS940	ENSG00000100288.19_3	CHKB	chr22	-	51018155	51018259	51018155	51018231	51018402	51018511	0.002	0.848231	1	0.645,0.946,0.673	0.754,0.853,0.651	177	149	28,21,22	13,1,9	40,69,31	11,10,14
A3SS942	ENSG00000151338.18_3	MIPOL1	chr14	+	37717003	37717112	37717033	37717112	37716307	37716445	-0.014	1	1	0.0,0.0,0.0	0.043,0.0,0.0	179	149	0,0,0	36,16,24	2,0,0	37,24,24
A3SS943	ENSG00000151338.18_3	MIPOL1	chr14	+	37736142	37736374	37736155	37736374	37717033	37717112	0.055	1	1	1.0,1.0,1.0	1.0,0.835,1.0	162	149	30,6,26	0,0,0	27,11,30	0,2,0
A3SS945	ENSG00000196388.8_2	INCA1	chr17	-	4892722	4892919	4892722	4892874	4893184	4893224	-0.058	0.430903	1	0.754,0.606,0.697	0.697,1.0,0.535	194	149	4,2,3	1,1,1	3,4,3	1,0,2
A3SS946	ENSG00000141013.16_3	GAS8	chr16	+	90097583	90097904	90097597	90097904	90094043	90094130	-0.089	0.526309	1	0.478,0.314,0.646	0.379,0.646,0.681	163	149	4,2,2	4,4,1	4,2,7	6,1,3
A3SS947	ENSG00000141013.16_3	GAS8	chr16	+	90097583	90097904	90097706	90097904	90094043	90094130	0.126	0.187006	0.712463	0.381,0.281,0.354	0.305,0.135,0.199	272	149	9,5,4	8,7,4	12,4,10	15,14,22
A3SS948	ENSG00000141013.16_3	GAS8	chr16	+	90097597	90097904	90097706	90097904	90094043	90094130	0.155	0.0752258	0.397265	0.394,0.366,0.302	0.35,0.11,0.136	258	149	9,7,3	8,7,4	14,3,6	15,14,22
A3SS949	ENSG00000184939.15_2	ZFP90	chr16	+	68592277	68592471	68592375	68592471	68591900	68592027	-0.061	0.02841	0.199941	0.0,0.194,0.0	0.07,0.167,0.141	247	149	0,2,0	4,5,5	2,2,3	16,6,11
A3SS950	ENSG00000161960.14_3	EIF4A1	chr17	+	7477577	7477626	7477583	7477626	7476145	7476182	0.001	1	1	1.0,1.0,1.0	0.999,0.998,1.0	155	149	1468,1339,1119	0,0,0	964,1161,1418	1,2,0
A3SS951	ENSG00000161960.14_3	EIF4A1	chr17	+	7477577	7477996	7477863	7477996	7476145	7476182	0.002	1	1	0.998,0.998,1.0	0.993,0.997,1.0	435	149	1329,1211,1006	1,1,0	866,1076,1280	2,1,0
A3SS952	ENSG00000161960.14_3	EIF4A1	chr17	+	7477839	7477996	7477863	7477996	7477577	7477626	0	1	1	0.0,0.001,0.001	0.0,0.001,0.001	173	149	1,2,1	2116,1946,1644	0,2,2	1543,1708,2060
A3SS953	ENSG00000161960.14_3	EIF4A1	chr17	+	7477839	7477996	7477865	7477996	7477577	7477626	-0.011	0.456219	1	0.096,0.116,0.066	0.0,0.134,0.176	175	149	1,2,1	8,13,12	0,2,2	1,11,8
A3SS954	ENSG00000161960.14_3	EIF4A1	chr17	+	7477863	7477996	7477865	7477996	7477577	7477626	-0.002	1	1	0.996,0.993,0.993	0.999,0.994,0.996	151	149	2116,1946,1644	8,13,12	1543,1708,2060	1,11,8
A3SS955	ENSG00000161960.14_3	EIF4A1	chr17	+	7479841	7480010	7479847	7480010	7478436	7478576	-0.001	0.699271	1	0.96,0.969,0.959	0.965,0.964,0.963	155	149	2692,2546,2266	109,79,93	2610,2654,2734	90,95,100
A3SS956	ENSG00000161960.14_3	EIF4A1	chr17	+	7479841	7480483	7480373	7480483	7478436	7478576	-0.002	1	1	0.998,1.0,0.996	1.0,1.0,1.0	681	149	2905,2747,2436	1,0,2	2845,2846,2977	0,0,0
A3SS957	ENSG00000161960.14_3	EIF4A1	chr17	+	7480661	7480805	7480751	7480805	7480373	7480483	-0.001	1	1	0.999,0.999,0.998	1.0,0.999,0.999	239	149	5425,4996,4477	2,4,6	4850,4812,5327	1,3,2
A3SS958	ENSG00000161960.14_3	EIF4A1	chr17	+	7481437	7481562	7481482	7481562	7481144	7481234	-0.002	1	1	0.003,0.003,0.004	0.003,0.008,0.006	194	149	16,12,15	3963,3667,3159	14,37,35	3721,3423,4223
A3SS959	ENSG00000161960.14_3	EIF4A1	chr17	+	7481437	7481562	7481544	7481562	7481144	7481234	-0.002	0.982759	1	0.984,0.994,0.989	0.993,0.996,0.983	256	149	1612,1545,1374	15,5,9	1260,1423,1649	5,3,17
A3SS960	ENSG00000161960.14_3	EIF4A1	chr17	+	7481482	7481562	7481544	7481562	7481144	7481234	-0.001	1	1	0.996,0.999,0.997	0.999,0.999,0.996	211	149	5559,5200,4518	15,5,9	4967,4809,5837	5,3,17
A3SS961	ENSG00000073578.16_3	SDHA	chr5	+	254472	254621	254507	254621	240472	240591	0.006	0.873038	1	0.099,0.036,0.048	0.036,0.064,0.065	184	149	5,1,1	37,22,16	2,4,3	44,47,35
A3SS962	ENSG00000073578.16_3	SDHA	chr5	+	256448	256794	256465	256794	254507	254621	-0.003	0.439228	1	0.983,0.983,0.99	0.984,0.993,0.988	166	149	658,529,425	10,8,4	706,754,657	10,5,7
A3SS964	ENSG00000266967.6_3	AARSD1	chr17	-	41108420	41108577	41108420	41108521	41109154	41109212	0.007	0.507055	1	0.982,0.964,0.953	0.941,0.949,0.987	205	149	74,73,84	1,2,3	110,102,104	5,4,1
A3SS967	ENSG00000262454.3_3	MIR193BHG	chr16	+	14417081	14417240	14417153	14417240	14416327	14416404	-0.333	1	1	1.0,1.0,0.0	NA,1.0,1.0	221	149	2,2,0	0,0,1	0,1,1	0,0,0
A3SS968	ENSG00000130159.13_4	ECSIT	chr19	-	11618516	11618665	11618516	11618544	11618805	11618863	-0.003	1	1	0.991,1.0,1.0	1.0,1.0,1.0	270	149	199,118,124	1,0,0	171,173,158	0,0,0
A3SS969	ENSG00000159069.13_3	FBXW5	chr9	-	139836497	139837147	139836497	139836918	139837220	139837395	-0.007	1	1	0.98,1.0,1.0	1.0,1.0,1.0	378	149	122,114,79	1,0,0	91,136,134	0,0,0
A3SS970	ENSG00000159069.13_3	FBXW5	chr9	-	139837220	139837425	139837220	139837395	139837800	139837958	0.01	0.225399	0.79588	0.022,0.02,0.025	0.024,0.012,0.0	179	149	4,3,4	146,125,131	4,2,0	133,138,126
A3SS971	ENSG00000159069.13_3	FBXW5	chr9	-	139837220	139837455	139837220	139837395	139837800	139837958	-0.002	1	1	0.005,0.022,0.0	0.021,0.0,0.011	209	149	1,4,0	146,125,131	4,0,2	133,138,126
A3SS972	ENSG00000159069.13_3	FBXW5	chr9	-	139837220	139837455	139837220	139837425	139837800	139837958	-0.219	0.200888	0.741542	0.172,0.625,0.0	0.454,0.0,1.0	179	149	1,2,0	4,1,4	2,0,2	2,2,0
A3SS973	ENSG00000083290.19_2	ULK2	chr17	-	19689249	19689399	19689249	19689318	19698934	19699038	-0.029	1	1	1.0,1.0,0.886	1.0,1.0,0.973	230	149	28,25,24	0,0,2	38,32,56	0,0,1
A3SS979	ENSG00000015479.18_3	MATR3	chr5	+	138660984	138661351	138661128	138661351	138658286	138658656	-0.006	0.0828278	0.420588	0.027,0.016,0.02	0.028,0.028,0.025	293	149	73,36,47	1323,1138,1169	78,59,51	1401,1046,1013
A3SS981	ENSG00000145819.15_3	ARHGAP26	chr5	+	142586762	142587038	142586947	142587038	142526795	142526946	-0.021	1	1	0.938,1.0,1.0	1.0,1.0,1.0	334	149	34,25,34	1,0,0	28,16,15	0,0,0
A3SS983	ENSG00000185187.12_3	SIGIRR	chr11	-	407424	407568	407424	407534	407816	407957	-0.097	1	1	0.71,1.0,1.0	NA,NA,1.0	183	149	3,1,1	1,0,0	0,0,4	0,0,0
A3SS984	ENSG00000198231.12_3	DDX42	chr17	+	61882403	61882535	61882430	61882535	61877827	61877977	0.02	0.302956	0.949929	0.034,0.019,0.094	0.043,0.034,0.011	176	149	3,1,7	73,44,57	8,4,2	151,96,147
A3SS985	ENSG00000105404.10_2	RABAC1	chr19	-	42460832	42461086	42460832	42461042	42461169	42461271	-0.005	0.702214	1	0.966,0.958,0.942	0.954,0.99,0.937	193	149	224,237,209	6,8,10	162,129,134	6,1,7
A3SS986	ENSG00000105404.10_2	RABAC1	chr19	-	42460832	42461086	42460832	42461042	42462437	42462535	-0.013	1	1	0.96,1.0,1.0	1.0,1.0,1.0	193	149	62,50,51	2,0,0	46,21,18	0,0,0
A3SS987	ENSG00000009830.11_3	POMT2	chr14	-	77745071	77745304	77745071	77745212	77746165	77746271	0.077	1	1	0.025,0.171,0.093	0.0,0.0,0.058	241	149	1,1,1	24,3,6	0,0,1	14,10,10
A3SS989	ENSG00000177674.15_4	AGTRAP	chr1	+	11805986	11806280	11806044	11806280	11805859	11805894	0.269	0.153883	0.631039	0.419,0.419,0.519	0.142,0.107,0.302	207	149	1,2,3	1,2,2	3,1,6	13,6,10
A3SS990	ENSG00000177674.15_4	AGTRAP	chr1	+	11805986	11806280	11806183	11806280	11805859	11805894	0.055	0.775276	1	0.244,0.256,0.301	0.184,0.151,0.301	346	149	6,4,5	8,5,5	11,7,12	21,17,12
A3SS991	ENSG00000177674.15_4	AGTRAP	chr1	+	11806044	11806280	11806183	11806280	11805859	11805894	-0.05	0.475848	1	0.28,0.293,0.293	0.341,0.268,0.408	288	149	6,4,4	8,5,5	21,12,16	21,17,12
A3SS992	ENSG00000176261.15_3	ZBTB8OS	chr1	-	33099551	33099711	33099551	33099673	33100368	33100393	-0.086	0.00563049	0.0632321	0.307,0.324,0.245	0.327,0.383,0.423	187	149	135,109,94	243,181,231	77,95,104	126,122,113
A3SS993	ENSG00000154114.12_3	TBCEL	chr11	+	120924259	120924441	120924338	120924441	120918236	120918376	-0.025	0.778078	1	0.779,0.604,0.611	0.691,0.478,0.901	228	149	27,7,12	5,3,5	24,21,14	7,15,1
A3SS994	ENSG00000168710.17_2	AHCYL1	chr1	+	110554983	110555084	110555008	110555084	110553835	110553979	0.008	0.243874	0.831325	0.996,0.989,0.978	0.971,0.982,0.987	174	149	290,209,206	1,2,4	238,249,184	6,4,2
A3SS996	ENSG00000130813.17_4	C19orf66	chr19	+	10202151	10202306	10202259	10202306	10201925	10202029	-0.04	0.30317	0.949929	0.812,0.798,0.771	0.89,0.793,0.818	257	149	112,102,87	15,15,15	56,53,62	4,8,8
A3SS998	ENSG00000134138.19_2	MEIS2	chr15	-	37187351	37187462	37187351	37187441	37188828	37188887	0.121	0.181122	0.698155	0.467,0.327,0.496	0.389,0.193,0.345	170	149	16,5,9	16,9,8	8,3,6	11,11,10
A3SS999	ENSG00000134138.19_2	MEIS2	chr15	-	37388489	37388631	37388489	37388608	37390167	37390400	-0.093	1	1	0.722,1.0,1.0	1.0,1.0,1.0	172	149	3,6,1	1,0,0	6,7,10	0,0,0
A3SS1000	ENSG00000159685.10_4	CHCHD6	chr3	+	126571486	126571573	126571489	126571573	126451920	126452065	0.014	0.67551	1	0.149,0.038,0.145	0.116,0.136,0.039	152	149	10,3,10	56,74,58	10,8,3	75,50,72
A3SS1001	ENSG00000159685.10_4	CHCHD6	chr3	+	126676258	126676394	126676267	126676394	126633522	126633593	-0.009	1	1	0.974,1.0,1.0	1.0,1.0,1.0	158	149	40,33,50	1,0,0	33,43,23	0,0,0
A3SS1003	ENSG00000136891.13_2	TEX10	chr9	-	103065913	103066124	103065913	103066067	103070781	103070963	-0.007	1	1	0.964,1.0,0.977	1.0,0.962,1.0	206	149	75,64,60	2,0,1	32,35,62	0,1,0
A3SS1005	ENSG00000124571.17_3	XPO5	chr6	-	43493576	43493692	43493576	43493659	43494422	43494485	0.001	1	1	0.0,0.01,0.0	0.0,0.006,0.0	182	149	0,1,0	108,84,110	0,1,0	120,145,126
A3SS1006	ENSG00000116786.11_3	PLEKHM2	chr1	+	16058383	16058543	16058444	16058543	16057686	16057752	-0.079	0.00151245	0.0242934	0.822,0.879,0.847	0.939,0.934,0.911	210	149	111,143,109	17,14,14	173,160,173	8,8,12
A3SS1007	ENSG00000116521.10_2	SCAMP3	chr1	-	155228616	155228745	155228616	155228683	155230120	155230241	-0.002	1	1	0.994,0.997,0.996	0.992,1.0,1.0	211	149	512,425,375	2,1,1	365,376,313	2,0,0
A3SS1009	ENSG00000204410.14_3	MSH5	chr6	+	31711915	31712076	31711966	31712076	31711680	31711802	0.526	0.00240632	0.033313	0.271,1.0,0.498	0.105,0.085,0.0	200	149	1,2,4	2,0,3	3,2,0	19,16,20
A3SS1012	ENSG00000204410.14_3	MSH5	chr6	+	31728961	31729039	31728964	31729039	31728466	31728616	0.162	0.122228	0.542352	0.098,0.329,0.495	0.07,0.168,0.197	152	149	1,3,6	9,6,6	3,7,5	39,34,20
A3SS1013	ENSG00000204410.14_3	MSH5	chr6	+	31729594	31729732	31729642	31729732	31729248	31729392	-0.046	1	1	0.819,1.0,1.0	0.956,1.0,1.0	197	149	6,8,5	1,0,0	29,21,40	1,0,0
A3SS1015	ENSG00000138767.12_3	CNOT6L	chr4	-	78695683	78695870	78695683	78695866	78697424	78697546	-0.01	1	1	0.898,1.0,1.0	1.0,0.929,1.0	153	149	9,18,10	1,0,0	23,27,29	0,2,0
A3SS1016	ENSG00000132604.10_3	TERF2	chr16	-	69402278	69402498	69402278	69402385	69404385	69404532	0.045	0.00276676	0.0372327	0.105,0.079,0.085	0.055,0.022,0.058	262	149	23,16,15	111,106,92	10,4,12	97,103,111
A3SS1017	ENSG00000143537.13_3	ADAM15	chr1	+	155024992	155025253	155025146	155025253	155023791	155023941	-0.013	0.279329	0.905937	0.047,0.016,0.01	0.048,0.053,0.011	303	149	4,2,1	40,59,47	3,6,1	29,53,43
A3SS1018	ENSG00000143537.13_3	ADAM15	chr1	+	155025116	155025253	155025146	155025253	155023826	155023941	0.019	0.132412	0.569298	0.077,0.041,0.0	0.028,0.015,0.019	179	149	4,3,0	40,59,47	1,1,1	29,53,43
A3SS1019	ENSG00000143537.13_3	ADAM15	chr1	+	155028177	155028328	155028262	155028328	155026789	155026982	0.258	0.0157985	0.133205	0.489,0.323,0.241	0.214,0.066,0.0	234	149	3,3,2	2,4,4	3,1,0	7,9,6
A3SS1020	ENSG00000143537.13_3	ADAM15	chr1	+	155028177	155028328	155028265	155028328	155026789	155026982	0.002	1	1	0.008,0.009,0.006	0.013,0.003,0.0	237	149	3,3,2	221,220,197	4,1,0	186,200,233
A3SS1021	ENSG00000143537.13_3	ADAM15	chr1	+	155028262	155028328	155028265	155028328	155026789	155026982	-0.02	0.0115984	0.105694	0.009,0.018,0.02	0.04,0.042,0.025	152	149	2,4,4	221,220,197	8,9,6	186,200,233
A3SS1022	ENSG00000143537.13_3	ADAM15	chr1	+	155033890	155033965	155033893	155033965	155033238	155033308	0.207	0.114366	0.51993	0.746,0.71,0.567	0.495,0.662,0.246	152	149	9,5,4	3,2,3	11,12,2	11,6,6
A3SS1023	ENSG00000100938.17_2	GMPR2	chr14	+	24703312	24703447	24703318	24703447	24702684	24702804	-0.046	0.503564	1	1.0,1.0,0.658	0.901,1.0,0.896	155	149	19,7,8	0,0,4	19,21,18	2,0,2
A3SS1024	ENSG00000100938.17_2	GMPR2	chr14	+	24706247	24706358	24706276	24706358	24705172	24705346	0.007	1	1	0.02,0.006,0.007	0.0,0.004,0.008	178	149	3,1,1	126,132,111	0,1,2	268,206,220
A3SS1025	ENSG00000177106.14_3	EPS8L2	chr11	+	710027	710486	710421	710486	709552	709608	0.001	1	1	0.012,0.0,0.004	0.002,0.0,0.012	543	149	2,0,1	47,64,66	1,0,5	114,140,116
A3SS1026	ENSG00000177106.14_3	EPS8L2	chr11	+	720548	720746	720596	720746	720061	720223	0.004	0.906366	1	0.07,0.108,0.098	0.104,0.098,0.061	197	149	5,8,6	50,50,42	16,15,9	104,105,104
A3SS1031	ENSG00000066427.21_3	ATXN3	chr14	-	92549469	92549602	92549469	92549579	92555073	92555161	0.005	1	1	1.0,1.0,1.0	0.986,1.0,1.0	172	149	65,68,74	0,0,0	79,73,38	1,0,0
A3SS1034	ENSG00000066427.21_3	ATXN3	chr14	-	92562436	92562481	92562436	92562478	92563017	92563182	0.017	1	1	1.0,1.0,1.0	0.968,0.98,1.0	152	149	71,44,54	0,0,0	61,50,40	2,1,0
A3SS1037	ENSG00000197275.13_3	RAD54B	chr8	-	95411641	95411849	95411641	95411793	95412465	95412691	-0.086	0.000569049	0.0114935	0.851,0.892,0.931	1.0,1.0,0.931	205	149	47,34,56	6,3,3	43,34,37	0,0,2
A3SS1038	ENSG00000163507.13_2	KIAA1524	chr3	-	108300954	108301049	108300954	108300985	108301823	108301930	-0.088	0.000206234	0.00507429	0.914,0.95,0.767	0.956,0.987,0.953	213	149	122,108,94	8,4,20	125,106,115	4,1,4
A3SS1039	ENSG00000163507.13_2	KIAA1524	chr3	-	108300954	108301049	108300954	108300985	108303911	108304059	-0.046	0.871075	1	1.0,1.0,0.863	1.0,1.0,1.0	213	149	62,42,36	0,0,4	47,47,47	0,0,0
A3SS1040	ENSG00000204681.10_3	GABBR1	chr6	-	29596863	29597024	29596863	29596884	29598234	29598420	0.228	0.507293	1	1.0,0.756,1.0	0.563,0.508,1.0	289	149	1,6,3	0,1,0	5,2,7	2,1,0
A3SS1041	ENSG00000204681.10_3	GABBR1	chr6	-	29596863	29597024	29596863	29596884	29599172	29599376	-0.055	0.792568	1	1.0,1.0,0.508	1.0,1.0,0.673	289	149	3,6,4	0,0,2	5,2,4	0,0,1
A3SS1042	ENSG00000168066.20_3	SF1	chr11	-	64532077	64533627	64532077	64532990	64534371	64534551	-0.028	0.4033	1	0.511,0.457,0.494	0.499,0.501,0.546	786	149	353,275,325	64,62,63	321,313,432	61,59,68
A3SS1043	ENSG00000168066.20_3	SF1	chr11	-	64532077	64533627	64532077	64532990	64534663	64534723	-0.4	0	0	0.524,0.471,0.545	0.943,0.911,0.886	786	149	285,230,253	49,49,40	262,269,329	3,5,8
A3SS1044	ENSG00000168066.20_3	SF1	chr11	-	64534663	64534723	64534663	64534718	64535042	64535316	0.022	0.220482	0.786553	0.881,0.941,0.967	0.919,0.907,0.896	154	149	245,262,210	32,16,7	234,212,196	20,21,22
A3SS1045	ENSG00000168066.20_3	SF1	chr11	-	64534663	64534747	64534663	64534718	64535042	64535316	0.079	0.323371	0.98559	0.173,0.295,0.264	0.227,0.166,0.102	178	149	8,8,3	32,16,7	7,5,3	20,21,22
A3SS1046	ENSG00000168066.20_3	SF1	chr11	-	64534663	64534747	64534663	64534723	64535042	64535316	0.001	1	1	0.0,0.003,0.004	0.0,0.004,0.0	173	149	0,1,1	237,255,208	0,1,0	227,208,193
A3SS1047	ENSG00000128604.19_3	IRF5	chr7	+	128587283	128587589	128587331	128587589	128587076	128587110	0.212	0.110441	0.507915	0.791,0.502,0.752	0.602,0.431,0.377	197	149	5,4,8	1,3,2	4,2,4	2,2,5
A3SS1049	ENSG00000166938.12_3	DIS3L	chr15	+	66599099	66599290	66599234	66599290	66587325	66587479	0.069	0.706207	1	1.0,1.0,1.0	1.0,0.794,1.0	284	149	5,5,8	0,0,0	23,22,18	0,3,0
A3SS1050	ENSG00000166938.12_3	DIS3L	chr15	+	66599161	66599290	66599234	66599290	66587325	66587479	0.025	1	1	1.0,1.0,1.0	1.0,0.924,1.0	222	149	35,9,22	0,0,0	75,54,70	0,3,0
A3SS1053	ENSG00000156990.14_3	RPUSD3	chr3	-	9881867	9882019	9881867	9881991	9882215	9882300	0.005	1	1	0.0,0.015,0.0	0.0,0.0,0.0	177	149	0,1,0	69,55,49	0,0,0	64,40,55
A3SS1054	ENSG00000075089.9_3	ACTR6	chr12	+	100613785	100613924	100613845	100613924	100612192	100612364	-0.024	0.0324202	0.220466	0.924,0.927,0.96	0.96,0.969,0.954	209	149	376,323,300	22,18,9	372,261,259	11,6,9
A3SS1057	ENSG00000170190.15_4	SLC16A5	chr17	+	73085208	73085399	73085245	73085399	73084054	73084139	0.275	0.000124793	0.00351824	0.706,1.0,1.0	1.0,0.364,0.516	186	149	3,6,1	1,0,0	9,5,8	0,7,6
A3SS1058	ENSG00000110801.13_3	PSMD9	chr12	+	122353761	122353850	122353764	122353850	122340911	122341013	-0.006	0.793425	1	0.925,0.924,0.933	0.927,0.933,0.94	152	149	175,161,171	14,13,12	285,240,241	22,17,15
A3SS1059	ENSG00000172009.14_2	THOP1	chr19	+	2811595	2811732	2811631	2811732	2810637	2810766	0.008	0.56629	1	1.0,0.973,0.985	0.965,0.979,0.991	185	149	99,91,84	0,2,1	102,116,141	3,2,1
A3SS1060	ENSG00000115286.19_3	NDUFS7	chr19	+	1388741	1388937	1388831	1388937	1388523	1388592	0.009	1	1	0.0,0.0,0.038	0.01,0.0,0.0	239	149	0,0,3	56,49,47	1,0,0	64,68,59
A3SS1061	ENSG00000115286.19_3	NDUFS7	chr19	+	1394416	1395588	1395389	1395588	1393240	1393329	0.007	0.12354	0.545896	0.012,0.014,0.024	0.012,0.015,0.003	1122	149	8,10,14	90,94,76	7,7,3	78,61,123
A3SS1062	ENSG00000160200.17_2	CBS	chr21	-	44473300	44474093	44473300	44473757	44476912	44476997	0.004	0.250945	0.845842	0.979,1.0,0.958	0.976,0.957,0.991	485	149	154,104,147	1,0,2	398,361,357	3,5,1
A3SS1063	ENSG00000104979.8_3	C19orf53	chr19	+	13886284	13886427	13886290	13886427	13885465	13885521	-0.17	1	1	1.0,0.49,1.0	NA,1.0,1.0	155	149	10,1,1	0,1,0	0,2,3	0,0,0
A3SS1069	ENSG00000198721.12_3	ECI2	chr6	-	4125483	4126471	4125483	4125604	4127995	4128065	0.01	1	1	1.0,1.0,1.0	1.0,0.971,1.0	1016	149	267,238,228	0,0,0	266,229,317	0,1,0
A3SS1071	ENSG00000198721.12_3	ECI2	chr6	-	4133782	4133945	4133782	4133935	4135744	4135831	-0.067	0.1379	0.585026	0.462,0.405,0.405	0.438,0.456,0.58	159	149	107,66,69	117,91,95	74,86,106	89,96,72
A3SS1072	ENSG00000135049.15_3	AGTPBP1	chr9	-	88270057	88270235	88270057	88270115	88272349	88272558	0.065	0.30304	0.949929	0.896,0.853,0.941	0.921,0.575,1.0	269	149	31,21,29	2,2,1	42,22,34	2,9,0
A3SS1073	ENSG00000157388.15_3	CACNA1D	chr3	+	53766841	53766989	53766844	53766989	53766042	53766109	-0.253	0.0765087	0.400912	0.495,1.0,0.746	1.0,1.0,1.0	152	149	3,5,3	3,0,1	3,5,2	0,0,0
A3SS1077	ENSG00000113141.17_3	IK	chr5	+	140031651	140031732	140031672	140031732	140031298	140031391	-0.001	1	1	0.0,0.0,0.0	0.001,0.002,0.0	170	149	0,0,0	595,433,480	1,1,0	631,458,523
A3SS1079	ENSG00000161714.11_3	PLCD3	chr17	-	43190806	43190973	43190806	43190956	43191617	43191734	0.006	1	1	1.0,1.0,0.993	0.988,1.0,0.988	166	149	168,153,153	0,0,1	185,209,188	2,0,2
A3SS1082	ENSG00000005302.17_3	MSL3	chrX	+	11783585	11783848	11783640	11783848	11781898	11782057	0.016	0.209907	0.761038	0.995,0.993,0.976	1.0,0.971,0.946	204	149	263,193,220	1,1,4	175,140,143	0,3,6
A3SS1084	ENSG00000033627.16_3	ATP6V0A1	chr17	+	40629656	40629760	40629677	40629760	40622107	40622236	0.065	0.21621	0.777992	0.392,0.419,0.398	0.345,0.382,0.287	170	149	50,46,34	68,56,45	9,12,11	15,17,24
A3SS1085	ENSG00000122033.14_2	MTIF3	chr13	-	28019224	28019293	28019224	28019274	28023988	28024055	-0.057	1	1	0.83,1.0,1.0	1.0,1.0,1.0	168	149	11,3,6	2,0,0	6,12,6	0,0,0
A3SS1089	ENSG00000140307.10_3	GTF2A2	chr15	-	59942867	59942972	59942867	59942963	59944404	59944525	0.001	0.845168	1	0.983,0.984,0.981	0.982,0.989,0.975	158	149	884,781,669	14,12,12	519,459,529	9,5,13
A3SS1091	ENSG00000160345.12_2	C9orf116	chr9	-	138387026	138387461	138387026	138387415	138390430	138390509	0.004	0.587157	1	0.929,0.961,1.0	0.929,1.0,0.948	195	149	51,32,34	3,1,0	68,33,48	4,0,2
A3SS1092	ENSG00000172530.20_4	BANP	chr16	+	88017665	88017865	88017689	88017865	88014641	88014733	-0.036	0.453387	1	1.0,1.0,0.87	1.0,1.0,0.977	173	149	51,43,39	0,0,5	40,33,49	0,0,1
A3SS1093	ENSG00000172530.20_4	BANP	chr16	+	88068928	88069000	88068937	88069000	88066714	88066851	-0.297	0.0222145	0.170295	0.497,0.255,0.295	0.509,0.919,0.509	158	149	22,8,8	21,22,18	11,12,11	10,1,10
A3SS1097	ENSG00000143499.13_2	SMYD2	chr1	+	214504292	214507651	214507542	214507651	214503510	214503621	-0.231	0.00498448	0.0580237	0.656,0.446,1.0	1.0,1.0,0.796	3399	149	479,312,526	11,17,0	439,376,446	0,0,5
A3SS1098	ENSG00000159363.17_3	ATP13A2	chr1	-	17318737	17318897	17318737	17318837	17318980	17319076	-0.028	1	1	1.0,0.97,0.945	1.0,1.0,1.0	209	149	33,45,24	0,1,1	28,20,30	0,0,0
A3SS1100	ENSG00000159363.17_3	ATP13A2	chr1	-	17326894	17327029	17326894	17327002	17328528	17328598	-0.218	0.000102834	0.00301599	0.797,0.843,0.597	0.891,1.0,1.0	176	149	37,19,14	8,3,8	29,10,19	3,0,0
A3SS1101	ENSG00000159363.17_3	ATP13A2	chr1	-	17330826	17330906	17330826	17330903	17331186	17331316	-0.035	0.913972	1	0.662,0.495,1.0	0.662,0.746,0.855	152	149	8,2,11	4,2,0	4,12,6	2,4,1
A3SS1102	ENSG00000159363.17_3	ATP13A2	chr1	-	17330826	17330906	17330826	17330903	17331201	17331316	0.026	1	1	0.932,1.0,1.0	1.0,1.0,0.855	152	149	14,18,10	1,0,0	10,13,6	0,0,1
A3SS1103	ENSG00000163995.19_3	ABLIM2	chr4	-	8009785	8009927	8009785	8009924	8010776	8010829	0.044	0.740896	1	0.62,0.873,0.696	0.395,1.0,0.662	152	149	5,7,7	3,1,3	4,6,6	6,0,3
A3SS1104	ENSG00000196118.11_3	CCDC189	chr16	-	30770662	30770878	30770662	30770779	30770974	30771045	0.426	0.0180994	0.147994	0.286,0.6,1.0	0.118,0.205,0.286	248	149	4,5,4	6,2,0	2,3,4	9,7,6
A3SS1105	ENSG00000196118.11_3	CCDC189	chr16	-	30770974	30771130	30770974	30771045	30771604	30771989	-0.033	0.739661	1	0.0,0.241,0.0	0.203,0.0,0.137	234	149	0,1,0	7,2,1	2,0,1	5,2,4
A3SS1106	ENSG00000196118.11_3	CCDC189	chr16	-	30771604	30771989	30771604	30771774	30772518	30772550	0.016	1	1	1.0,1.0,1.0	1.0,0.951,1.0	364	149	24,17,36	0,0,0	63,47,43	0,1,0
A3SS1107	ENSG00000077454.15_3	LRCH4	chr7	-	100174708	100175012	100174708	100174777	100175119	100175181	-0.019	1	1	1.0,1.0,0.943	1.0,1.0,1.0	384	149	34,32,43	0,0,1	26,24,42	0,0,0
A3SS1110	ENSG00000185246.17_3	PRPF39	chr14	+	45579751	45580020	45579805	45580020	45579296	45579423	-0.021	0.410036	1	0.985,0.969,0.954	1.0,1.0,0.97	203	149	87,42,57	1,1,2	71,105,89	0,0,2
A3SS1112	ENSG00000162910.18_2	MRPL55	chr1	-	228295677	228295838	228295677	228295785	228295935	228296019	0.557	1	1	NA,NA,1.0	1.0,0.0,0.33	202	149	0,0,1	0,0,0	2,0,2	0,1,3
A3SS1113	ENSG00000162910.18_2	MRPL55	chr1	-	228295935	228296022	228295935	228296019	228296137	228296175	0.08	0.103818	0.486133	0.222,0.191,0.102	0.174,0.061,0.041	152	149	9,7,3	31,29,26	9,3,1	42,45,23
A3SS1117	ENSG00000163743.13_2	RCHY1	chr4	-	76415790	76415911	76415790	76415873	76416820	76416847	-0.001	1	1	0.973,1.0,1.0	1.0,0.976,1.0	187	149	89,85,86	2,0,0	127,103,106	0,2,0
A3SS1118	ENSG00000215041.9_3	NEURL4	chr17	-	7220779	7221003	7220779	7220892	7221106	7221251	0.088	0.00028341	0.00666999	0.15,0.074,0.193	0.05,0.048,0.054	260	149	17,7,20	55,50,48	5,4,4	54,45,40
A3SS1119	ENSG00000215041.9_3	NEURL4	chr17	-	7221587	7221993	7221587	7221675	7222368	7222527	-0.042	1	1	0.937,0.936,1.0	1.0,1.0,1.0	467	149	47,46,36	1,1,0	17,28,28	0,0,0
A3SS1120	ENSG00000215041.9_3	NEURL4	chr17	-	7221813	7222010	7221813	7221993	7222368	7222527	0.09	9.06014e-05	0.00270953	0.125,0.06,0.085	0.0,0.0,0.0	166	149	7,3,3	44,42,29	0,0,0	14,25,24
A3SS1121	ENSG00000215041.9_3	NEURL4	chr17	-	7227426	7227589	7227426	7227585	7227713	7227799	-0.024	0.0570128	0.325882	0.85,0.921,0.979	0.959,1.0,0.864	153	149	29,36,47	5,3,1	24,24,13	1,0,2
A3SS1123	ENSG00000136856.17_3	SLC2A8	chr9	+	130165938	130166082	130166016	130166082	130162185	130162285	0.055	1	1	1.0,0.913,1.0	0.747,1.0,1.0	227	149	11,16,16	0,1,0	9,9,19	2,0,0
A3SS1124	ENSG00000136856.17_3	SLC2A8	chr9	+	130165938	130166082	130166016	130166082	130164835	130165032	-0.089	0.213484	0.771936	0.821,0.546,0.855	0.724,1.0,0.766	227	149	7,11,9	1,6,1	12,11,10	3,0,2
A3SS1126	ENSG00000099953.9_3	MMP11	chr22	+	24123974	24124670	24124412	24124670	24123379	24123596	0.064	1	1	0.0,0.078,0.113	NA,0.0,0.0	587	149	0,1,1	2,3,2	0,0,0	0,3,1
A3SS1129	ENSG00000134184.12_3	GSTM1	chr1	+	110230738	110230867	110230791	110230867	110230466	110230531	-0.003	0.710048	1	0.018,0.048,0.04	0.053,0.009,0.052	202	149	5,9,8	198,133,142	12,3,19	157,253,253
A3SS1130	ENSG00000134184.12_3	GSTM1	chr1	+	110231612	110231751	110231669	110231751	110231294	110231359	0.013	0.780461	1	0.022,0.028,0.005	0.009,0.004,0.003	206	149	5,4,1	164,102,147	2,1,1	166,181,248
A3SS1131	ENSG00000160305.17_3	DIP2A	chr21	+	47931329	47931527	47931341	47931527	47929169	47929289	-0.015	1	1	1.0,0.928,1.0	0.974,1.0,1.0	161	149	24,14,23	0,1,0	40,29,33	1,0,0
A3SS1132	ENSG00000164241.13_3	C5orf63	chr5	-	126386995	126387639	126386995	126387176	126388304	126388361	-0.213	0.204598	0.750841	0.362,1.0,1.0	1.0,1.0,1.0	612	149	7,5,9	3,0,0	8,5,10	0,0,0
A3SS1135	ENSG00000159210.9_4	SNF8	chr17	-	47009004	47009079	47009004	47009076	47010566	47010708	-0.01	0.373837	1	0.955,0.952,0.973	0.964,0.95,0.996	152	149	306,242,255	14,12,7	415,308,277	15,16,1
A3SS1136	ENSG00000159210.9_4	SNF8	chr17	-	47009004	47009079	47009004	47009076	47013531	47013604	-0.097	1	1	1.0,0.71,1.0	1.0,NA,1.0	152	149	18,5,10	0,2,0	1,0,5	0,0,0
A3SS1137	ENSG00000255073.8_3	ZFP91-CNTF	chr11	+	58390213	58390339	58390238	58390339	58384668	58385041	-1	1	1	0.0,NA,0.0	1.0,NA,1.0	174	149	0,0,0	2,0,1	2,0,2	0,0,0
A3SS1141	ENSG00000132361.16_3	CLUH	chr17	-	2599727	2599832	2599727	2599829	2600012	2600236	-0.071	0.161349	0.650014	0.692,0.582,0.584	0.641,0.662,0.767	152	149	55,44,33	24,31,23	31,40,67	17,20,20
A3SS1142	ENSG00000132361.16_3	CLUH	chr17	-	2603971	2604119	2603971	2604076	2604433	2604559	-0.009	0.60446	1	0.986,0.992,0.967	0.972,1.0,1.0	192	149	182,162,150	2,1,4	177,172,209	4,0,0
A3SS1143	ENSG00000214717.11_3	ZBED1	chrX	-	2404454	2408813	2404454	2408810	2418857	2419008	-0.029	0.947203	1	0.551,0.541,0.907	0.638,0.627,0.821	152	149	5,6,10	4,5,1	9,12,14	5,7,3
A3SS1144	ENSG00000146733.13_2	PSPH	chr7	-	56087292	56087501	56087292	56087427	56088765	56088924	0.004	1	1	0.0,0.005,0.008	0.0,0.0,0.0	223	149	0,1,1	130,132,83	0,0,0	123,125,132
A3SS1145	ENSG00000146733.13_2	PSPH	chr7	-	56099621	56099747	56099621	56099670	56101653	56101799	0.002	1	1	0.972,1.0,1.0	0.979,1.0,0.987	226	149	210,174,188	4,0,0	208,208,224	3,0,2
A3SS1146	ENSG00000146733.13_2	PSPH	chr7	-	56101653	56101847	56101653	56101799	56118830	56119297	0.068	0.0190176	0.152657	1.0,0.966,1.0	0.819,0.963,0.98	197	149	43,38,18	0,1,0	30,34,65	5,1,1
A3SS1147	ENSG00000104408.9_3	EIF3E	chr8	-	109252186	109252327	109252186	109252304	109254027	109254142	-0.009	0.834932	1	0.003,0.003,0.002	0.015,0.009,0.01	172	149	3,3,2	991,796,796	19,11,12	1089,1005,1078
A3SS1148	ENSG00000175215.10_3	CTDSP2	chr12	-	58217686	58217872	58217686	58217788	58218009	58218102	-0.012	0.55528	1	0.924,0.908,0.873	0.875,0.96,0.906	233	149	397,356,311	21,23,29	351,339,377	32,9,25
A3SS1149	ENSG00000175215.10_3	CTDSP2	chr12	-	58220778	58220906	58220778	58220880	58221334	58221373	-0.006	0.580041	1	0.012,0.005,0.016	0.025,0.005,0.022	175	149	3,1,3	214,168,161	5,1,5	166,169,193
A3SS1150	ENSG00000168385.17_3	SEPT2	chr2	+	242265381	242265528	242265407	242265528	242263630	242263656	-0.001	1	1	0.0,0.0,0.0	0.003,0.0,0.0	175	149	0,0,0	300,163,221	1,0,0	246,282,339
A3SS1151	ENSG00000168385.17_3	SEPT2	chr2	+	242275373	242275513	242275389	242275513	242274540	242274627	0.005	0.470649	1	0.024,0.038,0.013	0.027,0.01,0.024	165	149	12,16,5	440,370,344	17,6,14	559,524,512
A3SS1152	ENSG00000166478.9_3	ZNF143	chr11	+	9496096	9496180	9496099	9496180	9495487	9495571	0.046	0.39928	1	0.769,0.713,0.811	0.782,0.702,0.671	152	149	51,38,57	15,15,13	22,24,25	6,10,12
A3SS1153	ENSG00000145332.13_2	KLHL8	chr4	-	88106402	88106951	88106402	88106723	88116475	88116842	0.033	1	1	1.0,1.0,1.0	1.0,1.0,0.901	377	149	32,25,16	0,0,0	17,13,23	0,0,1
A3SS1154	ENSG00000025708.13_3	TYMP	chr22	-	50964429	50964585	50964429	50964570	50964674	50964905	0.034	1	1	0.0,0.102,0.0	0.0,0.0,0.0	164	149	0,2,0	16,16,14	0,0,0	16,18,9
A3SS1158	ENSG00000132964.11_2	CDK8	chr13	+	26975602	26975761	26975605	26975761	26975405	26975484	-0.02	0.868227	1	0.753,0.633,0.629	0.582,0.769,0.725	152	149	59,44,45	19,25,26	44,34,35	31,10,13
A3SS1160	ENSG00000071655.17_3	MBD3	chr19	-	1578333	1578537	1578333	1578533	1581090	1581268	-0.003	0.589891	1	0.983,0.973,0.964	0.994,0.97,0.966	153	149	177,147,164	3,4,6	173,133,148	1,4,5
A3SS1161	ENSG00000181090.20_4	EHMT1	chr9	+	140637822	140637980	140637843	140637980	140622800	140622981	-0.033	0.467648	1	0.293,0.388,0.322	0.384,0.402,0.316	170	149	18,13,13	38,18,24	27,23,20	38,30,38
A3SS1162	ENSG00000181090.20_4	EHMT1	chr9	+	140708702	140708960	140708882	140708960	140707837	140707982	0.055	0.0178123	0.146755	0.145,0.043,0.145	0.04,0.106,0.023	329	149	12,2,6	32,20,16	2,5,2	22,19,38
A3SS1163	ENSG00000137812.19_3	KNL1	chr15	+	40903675	40903709	40903681	40903709	40902442	40902495	-0.018	1	1	1.0,1.0,0.947	1.0,1.0,1.0	155	149	43,16,37	0,0,2	25,11,21	0,0,0
A3SS1164	ENSG00000004897.11_3	CDC27	chr17	-	45199809	45199966	45199809	45199902	45201251	45201326	0.034	0.00446008	0.0535309	0.963,0.975,0.962	0.936,0.951,0.911	213	149	374,274,253	10,5,7	294,251,291	14,9,20
A3SS1165	ENSG00000004897.11_3	CDC27	chr17	-	45219218	45219391	45219218	45219388	45219594	45219802	0.007	0.930737	1	0.433,0.485,0.522	0.437,0.499,0.483	152	149	96,75,77	123,78,69	61,63,79	77,62,83
A3SS1166	ENSG00000004897.11_3	CDC27	chr17	-	45229171	45229302	45229171	45229284	45232037	45232152	0.059	0.0226146	0.171207	0.256,0.144,0.184	0.151,0.119,0.136	167	149	52,19,30	135,101,119	24,16,23	120,106,130
A3SS1167	ENSG00000004897.11_3	CDC27	chr17	-	45232037	45232230	45232037	45232152	45234278	45234490	-0.015	0.0511503	0.302242	0.017,0.019,0.013	0.038,0.026,0.031	227	149	4,3,3	152,104,151	7,5,7	116,121,146
A3SS1168	ENSG00000004897.11_3	CDC27	chr17	-	45234278	45234490	45234278	45234349	45234595	45234750	0.011	0.528528	1	1.0,0.985,0.988	0.977,0.975,0.987	290	149	205,124,154	0,1,1	163,151,153	2,2,1
A3SS1169	ENSG00000214193.10_4	SH3D21	chr1	+	36786656	36787379	36787324	36787379	36786515	36786579	0.146	0.39119	1	1.0,1.0,1.0	0.561,1.0,1.0	817	149	26,23,35	0,0,0	21,44,27	3,0,0
A3SS1172	ENSG00000173267.13_2	SNCG	chr10	+	88719705	88719885	88719757	88719885	88719389	88719431	0.05	0.332375	1	0.158,0.138,0.374	0.18,0.125,0.215	201	149	17,11,29	67,51,36	8,5,7	27,26,19
A3SS1181	ENSG00000142675.17_2	CNKSR1	chr1	+	26510632	26510778	26510704	26510778	26510219	26510321	-0.391	1	1	NA,NA,0.0	0.403,0.0,0.771	221	149	0,0,0	0,0,2	1,0,5	1,1,1
A3SS1183	ENSG00000116299.16_2	KIAA1324	chr1	+	109745534	109745853	109745565	109745853	109743356	109743522	-0.069	0.0690352	0.374164	0.0,0.0,0.0	0.04,0.101,0.065	180	149	0,0,0	12,15,12	1,3,1	20,22,12
A3SS1186	ENSG00000168781.21_3	PPIP5K1	chr15	-	43865231	43865358	43865231	43865346	43865554	43865682	0.105	1	1	0.316,0.0,0.0	NA,0.0,0.0	161	149	1,0,0	2,1,3	0,0,0	0,1,2
A3SS1187	ENSG00000168781.21_3	PPIP5K1	chr15	-	43873424	43873627	43873424	43873586	43874050	43874152	-0.092	0.418712	1	0.523,0.541,0.541	0.611,0.758,0.511	190	149	7,6,6	5,4,4	8,4,4	4,1,3
A3SS1188	ENSG00000168781.21_3	PPIP5K1	chr15	-	43876555	43876787	43876555	43876730	43876996	43877090	-0.014	0.569017	1	0.116,0.083,0.037	0.126,0.0,0.153	206	149	2,1,1	11,8,19	3,0,2	15,9,8
A3SS1189	ENSG00000168781.21_3	PPIP5K1	chr15	-	43876555	43876819	43876555	43876730	43882369	43882399	0.159	0.20867	0.759092	0.715,0.385,0.385	0.385,0.238,0.385	238	149	4,2,1	1,2,1	2,1,1	2,2,1
A3SS1190	ENSG00000184584.12_3	TMEM173	chr5	-	138860743	138861289	138860743	138860927	138861794	138861887	-0.053	0.121287	0.539462	0.764,0.869,0.847	0.958,0.817,0.865	511	149	111,91,95	10,4,5	79,46,88	1,3,4
A3SS1191	ENSG00000116580.18_2	GON4L	chr1	-	155721750	155722381	155721750	155722378	155722994	155723205	0.006	1	1	0.0,0.0,0.019	0.0,0.0,0.0	152	149	0,0,1	47,41,52	0,0,0	38,36,45
A3SS1192	ENSG00000001084.10_3	GCLC	chr6	-	53380906	53381020	53380906	53381015	53385575	53385758	0.012	0.560373	1	0.985,1.0,0.99	0.976,0.992,0.972	154	149	134,109,105	2,0,1	84,127,106	2,1,3
A3SS1194	ENSG00000125319.14_2	C17orf53	chr17	+	42231920	42232032	42231923	42232032	42230004	42230145	0.023	0.822576	1	0.14,0.246,0.0	0.0,0.098,0.219	152	149	1,1,0	6,3,3	0,1,2	12,9,7
A3SS1195	ENSG00000108395.13_4	TRIM37	chr17	-	57078958	57079102	57078958	57079075	57089688	57089807	0.038	0.0100119	0.0959197	0.063,0.043,0.084	0.057,0.005,0.013	176	149	9,6,11	113,113,101	14,1,2	196,157,133
A3SS1196	ENSG00000125733.17_2	TRIP10	chr19	+	6746039	6746207	6746188	6746207	6744810	6745005	0.053	0.208286	0.758975	1.0,1.0,1.0	0.935,0.967,0.939	298	149	64,58,75	0,0,0	58,59,62	2,1,2
A3SS1197	ENSG00000125733.17_2	TRIP10	chr19	+	6746443	6746572	6746462	6746572	6744810	6745005	-0.001	1	1	0.001,0.005,0.0	0.006,0.003,0.0	168	149	1,3,0	591,504,445	4,2,0	552,572,511
A3SS1198	ENSG00000143793.12_2	C1orf35	chr1	-	228289780	228290083	228289780	228289866	228290178	228290261	-0.159	8.06026e-07	4.90227e-05	0.853,0.806,0.727	1.0,1.0,0.863	366	149	114,102,118	8,10,18	132,118,93	0,0,6
A3SS1199	ENSG00000143793.12_2	C1orf35	chr1	-	228290010	228290261	228290010	228290083	228290343	228290389	-0.009	1	1	0.972,1.0,1.0	1.0,1.0,1.0	327	149	151,139,135	2,0,0	187,156,150	0,0,0
A3SS1200	ENSG00000116459.10_2	ATP5F1	chr1	+	111998707	111998871	111998848	111998871	111992458	111992495	0	1	1	0.996,1.0,0.997	1.0,0.995,0.998	290	149	981,825,757	2,0,1	952,817,985	0,2,1
A3SS1202	ENSG00000066136.20_3	NFYC	chr1	+	41236068	41237275	41236380	41237275	41235027	41235087	0.027	0.233602	0.81057	0.127,0.177,0.201	0.135,0.139,0.15	461	149	52,54,73	116,81,94	48,53,54	99,106,99
A3SS1204	ENSG00000138459.8_3	SLC35A5	chr3	+	112300025	112300173	112300091	112300173	112299392	112299553	-0.044	0.196644	0.733249	0.907,0.858,0.8	0.92,0.91,0.866	215	149	42,35,52	3,4,9	33,44,28	2,3,3
A3SS1205	ENSG00000204941.13_2	PSG5	chr19	-	43671894	43672355	43671894	43672287	43674206	43674290	-0.647	1	1	NA,NA,0.256	1.0,0.805,NA	217	149	0,0,1	0,0,2	1,6,0	0,1,0
A3SS1206	ENSG00000173744.17_3	AGFG1	chr2	+	228399560	228399741	228399623	228399741	228398264	228398474	0.005	1	1	1.0,1.0,1.0	1.0,1.0,0.986	212	149	141,129,99	0,0,0	69,60,99	0,0,1
A3SS1207	ENSG00000173744.17_3	AGFG1	chr2	+	228418419	228418511	228418425	228418511	228416674	228416833	0.01	0.887823	1	0.855,0.947,0.925	0.842,0.954,0.9	155	149	92,93,77	15,5,6	50,65,56	9,3,6
A3SS1209	ENSG00000099810.18_3	MTAP	chr9	+	21859284	21859424	21859301	21859424	21854629	21854869	0.001	1	1	0.0,0.006,0.0	0.004,0.0,0.0	166	149	0,1,0	224,162,162	1,0,0	206,154,204
A3SS1210	ENSG00000159176.13_2	CSRP1	chr1	-	201465319	201465432	201465319	201465389	201476197	201476251	0.002	1	1	1.0,1.0,1.0	0.998,1.0,0.997	192	149	885,648,561	0,0,0	809,676,775	1,0,2
A3SS1213	ENSG00000139370.11_3	SLC15A4	chr12	-	129294487	129294656	129294487	129294598	129299319	129299615	0.089	0.010767	0.100834	0.828,1.0,1.0	0.834,0.956,0.771	207	149	20,14,17	3,0,0	35,30,28	5,1,6
A3SS1214	ENSG00000167220.11_3	HDHD2	chr18	-	44660866	44661075	44660866	44661048	44662709	44662820	0.043	1	1	1.0,1.0,1.0	1.0,0.871,1.0	176	149	6,4,1	0,0,0	12,16,17	0,2,0
A3SS1215	ENSG00000110203.8_3	FOLR3	chr11	+	71849878	71850156	71850006	71850156	71846992	71847166	0.755	1.43208e-08	1.40943e-06	0.264,1.0,1.0	0.0,0.0,0.0	277	149	4,5,3	6,0,0	0,0,0	6,1,1
A3SS1216	ENSG00000112739.16_2	PRPF4B	chr6	+	4061888	4062533	4062446	4062533	4061248	4061381	-0.066	0.00107963	0.0188354	0.973,0.929,0.873	1.0,0.972,1.0	707	149	170,125,195	1,2,6	242,166,285	0,1,0
A3SS1220	ENSG00000196923.13_3	PDLIM7	chr5	-	176916771	176917032	176916771	176916833	176917870	176917907	-0.02	0.00159762	0.0253581	0.009,0.018,0.024	0.027,0.046,0.038	348	149	3,6,8	149,141,139	13,21,19	198,188,205
A3SS1221	ENSG00000196923.13_3	PDLIM7	chr5	-	176918807	176918977	176918807	176918926	176919405	176919436	-0.02	0.00782326	0.0806005	0.004,0.012,0.012	0.02,0.037,0.031	200	149	1,2,2	188,128,125	4,6,8	143,117,185
A3SS1222	ENSG00000196923.13_3	PDLIM7	chr5	-	176918807	176918996	176918807	176918926	176919405	176919436	-0.005	0.964195	1	0.004,0.005,0.016	0.005,0.034,0.0	219	149	1,1,3	188,128,125	1,6,0	143,117,185
A3SS1223	ENSG00000196923.13_3	PDLIM7	chr5	-	176918807	176918996	176918807	176918977	176919405	176919436	0.315	0.0309346	0.212894	0.47,0.307,0.639	0.0,0.47,0.0	168	149	1,1,2	1,2,1	0,2,0	3,2,8
A3SS1224	ENSG00000100099.20_2	HPS4	chr22	-	26866684	26866888	26866684	26866779	26868267	26868384	0.293	0.000167451	0.00437879	0.321,0.49,0.514	0.188,0.161,0.098	258	149	9,15,11	11,9,6	4,4,3	10,12,16
A3SS1227	ENSG00000213471.10_4	TTLL13P	chr15	+	90806971	90807290	90807178	90807290	90806197	90806377	0.795	1	1	1.0,1.0,0.386	NA,0.0,0.0	356	149	1,1,3	0,0,2	0,0,0	0,1,2
A3SS1228	ENSG00000213471.10_4	TTLL13P	chr15	+	90806986	90807290	90807178	90807290	90806197	90806377	0.799	1	1	1.0,1.0,0.396	NA,0.0,0.0	341	149	2,1,3	0,0,2	0,0,0	0,1,2
A3SS1232	ENSG00000121753.12_3	ADGRB2	chr1	-	32193782	32193881	32193782	32193878	32194198	32194234	-0.052	0.207754	0.758975	0.744,0.792,0.746	0.808,0.774,0.855	152	149	77,66,81	26,17,27	30,42,30	7,12,5
A3SS1237	ENSG00000167996.15_3	FTH1	chr11	-	61732458	61732584	61732458	61732577	61732840	61732987	0	1	1	0.992,0.993,0.994	0.993,0.992,0.993	156	149	17803,14948,13205	136,99,73	16776,18097,17618	118,136,120
A3SS1239	ENSG00000256525.6_2	POLG2	chr17	-	62479035	62479116	62479035	62479091	62481844	62481985	0.01	0.924923	1	0.971,0.972,0.974	1.0,0.942,0.945	174	149	78,41,43	2,1,1	65,38,40	0,2,2
A3SS1242	ENSG00000247828.7_4	TMEM161B-AS1	chr5	+	87578531	87578683	87578573	87578683	87577858	87577923	0.063	0.249656	0.844617	1.0,1.0,1.0	0.879,1.0,0.932	191	149	17,9,16	0,0,0	28,34,35	3,0,2
A3SS1243	ENSG00000105419.17_3	MEIS3	chr19	-	47910608	47910823	47910608	47910685	47912355	47912504	0.139	0.00136556	0.0226585	0.236,0.25,0.283	0.232,0.038,0.083	287	149	19,9,16	32,14,21	7,2,4	12,26,23
A3SS1244	ENSG00000105419.17_3	MEIS3	chr19	-	47917973	47918123	47917973	47918072	47918307	47918358	0.228	0.0173181	0.143723	0.644,0.511,0.358	0.318,0.293,0.218	200	149	17,7,3	7,5,4	5,5,3	8,9,8
A3SS1246	ENSG00000126088.13_3	UROD	chr1	+	45479246	45479463	45479265	45479463	45478807	45479026	0.023	0.446993	1	0.224,0.237,0.254	0.215,0.249,0.183	168	149	56,40,41	172,114,107	43,46,36	139,123,143
A3SS1247	ENSG00000078061.12_2	ARAF	chrX	+	47424641	47424749	47424650	47424749	47424383	47424538	-0.005	0.6624	1	0.025,0.012,0.018	0.021,0.039,0.011	158	149	5,2,3	184,156,151	3,6,2	131,139,172
A3SS1249	ENSG00000076944.15_3	STXBP2	chr19	+	7705583	7705695	7705625	7705695	7704616	7704693	0.061	1	1	1.0,0.845,1.0	1.0,1.0,0.661	191	149	5,7,5	0,1,0	6,4,5	0,0,2
A3SS1250	ENSG00000076944.15_3	STXBP2	chr19	+	7705616	7705695	7705625	7705695	7704616	7704693	0	1	1	1.0,0.988,1.0	1.0,1.0,0.987	158	149	135,86,98	0,1,0	141,130,158	0,0,2
A3SS1251	ENSG00000076944.15_3	STXBP2	chr19	+	7707314	7707709	7707651	7707709	7707088	7707219	0.008	1	1	1.0,1.0,0.961	1.0,0.959,0.978	486	149	137,126,80	0,0,1	187,152,145	0,2,1
A3SS1252	ENSG00000076944.15_3	STXBP2	chr19	+	7711057	7711230	7711134	7711230	7710082	7710192	0.01	0.637706	1	0.007,0.03,0.015	0.014,0.0,0.007	226	149	2,7,3	192,151,129	4,0,2	180,161,200
A3SS1254	ENSG00000169045.17_1	HNRNPH1	chr5	-	179047892	179048398	179047892	179048036	179050037	179050165	-0.011	0.822265	1	0.998,0.975,0.993	1.0,1.0,1.0	511	149	1974,1450,1820	1,11,4	1369,1190,1435	0,0,0
A3SS1255	ENSG00000169045.17_1	HNRNPH1	chr5	-	179050037	179050188	179050037	179050165	179050636	179050671	0.01	0.0815385	0.415601	0.022,0.019,0.015	0.007,0.013,0.007	172	149	10,6,6	387,271,336	2,3,2	238,192,240
A3SS1258	ENSG00000131375.9_2	CAPN7	chr3	+	15292437	15292530	15292481	15292530	15288833	15288964	-0.003	1	1	1.0,0.991,0.991	0.99,1.0,1.0	193	149	170,137,138	0,1,1	134,127,119	1,0,0
A3SS1259	ENSG00000105726.16_2	ATP13A1	chr19	-	19764777	19764953	19764777	19764883	19765351	19765509	-0.119	0.000453817	0.0095584	0.758,0.819,0.702	0.864,0.872,0.899	219	149	106,80,118	23,12,34	112,90,92	12,9,7
A3SS1261	ENSG00000100227.17_2	POLDIP3	chr22	-	42997975	42998113	42997975	42998062	42998775	42999166	-0.007	1	1	0.0,0.0,0.0	0.0,0.0,0.021	200	149	0,0,0	41,20,22	0,0,1	37,41,34
A3SS1262	ENSG00000100162.14_2	CENPM	chr22	-	42341228	42341393	42341228	42341308	42341916	42342009	-0.021	0.649786	1	0.0,0.0,0.0	0.021,0.0,0.041	234	149	0,0,0	55,40,39	3,0,4	89,74,60
A3SS1263	ENSG00000134453.15_3	RBM17	chr10	+	6148103	6148201	6148106	6148201	6146893	6147060	-0.001	1	1	0.997,1.0,1.0	1.0,1.0,1.0	152	149	340,271,247	1,0,0	397,332,373	0,0,0
A3SS1264	ENSG00000196074.12_4	SYCP2	chr20	-	58496364	58496508	58496364	58496505	58497444	58497514	0.012	0.671078	1	0.919,0.855,0.819	0.782,0.897,0.877	152	149	46,24,37	4,4,8	44,62,51	12,7,7
A3SS1265	ENSG00000248712.7_2	CCDC153	chr11	-	119063860	119064595	119063860	119063953	119065632	119065704	-0.364	0.614541	1	0.086,0.0,0.04	0.159,0.059,1.0	791	149	5,0,2	10,4,9	2,1,2	2,3,0
A3SS1266	ENSG00000139974.15_3	SLC38A6	chr14	+	61545527	61545645	61545547	61545645	61518758	61518853	0.266	1	1	1.0,NA,NA	1.0,NA,0.469	169	149	3,0,0	0,0,0	1,0,1	0,0,1
A3SS1267	ENSG00000139974.15_3	SLC38A6	chr14	+	61545527	61545645	61545547	61545645	61519066	61519703	0.031	1	1	1.0,0.0,NA	0.469,NA,0.469	169	149	3,0,0	0,1,0	1,0,1	1,0,1
A3SS1268	ENSG00000196155.12_3	PLEKHG4	chr16	+	67322378	67322507	67322391	67322507	67322069	67322303	-0.098	0.192858	0.726472	0.099,0.211,0.103	0.103,0.216,0.389	162	149	3,9,2	25,31,16	1,3,9	8,10,13
A3SS1269	ENSG00000188321.13_4	ZNF559	chr19	+	9452292	9454519	9452370	9454519	9451777	9451860	-0.091	0.231047	0.807746	0.347,0.383,0.291	0.383,0.354,0.558	227	149	17,18,10	21,19,16	17,10,25	18,12,13
A3SS1275	ENSG00000138381.9_3	ASNSD1	chr2	+	190530082	190530177	190530101	190530177	190528626	190528680	-0.007	1	1	0.0,0.0,0.007	0.008,0.019,0.0	168	149	0,0,1	187,142,123	1,2,0	113,93,107
A3SS1276	ENSG00000138381.9_3	ASNSD1	chr2	+	190530082	190530177	190530147	190530177	190528626	190528680	0.043	0.618714	1	0.486,0.687,0.642	0.599,0.559,0.529	214	149	34,41,36	25,13,14	30,20,21	14,11,13
A3SS1277	ENSG00000138381.9_3	ASNSD1	chr2	+	190530101	190530177	190530147	190530177	190528626	190528680	0.009	0.83894	1	0.871,0.915,0.896	0.886,0.885,0.883	195	149	221,183,158	25,13,14	142,111,128	14,11,13
A3SS1278	ENSG00000138381.9_3	ASNSD1	chr2	+	190530766	190532322	190531921	190532322	190530101	190530177	-0.012	1	1	1.0,1.0,0.963	1.0,1.0,1.0	1304	149	796,636,689	0,0,3	725,559,621	0,0,0
A3SS1279	ENSG00000131725.13_3	WDR44	chrX	+	117577522	117577650	117577546	117577650	117576527	117576643	-0.001	1	1	0.989,0.975,1.0	0.983,1.0,0.983	173	149	105,89,95	1,2,0	67,63,69	1,0,1
A3SS1281	ENSG00000087087.19_4	SRRT	chr7	+	100480078	100480711	100480385	100480711	100479673	100479862	-0.24	0.00163609	0.0256699	0.07,0.025,0.246	0.515,0.246,0.301	456	149	3,1,12	13,13,12	13,13,25	4,13,19
A3SS1282	ENSG00000087087.19_4	SRRT	chr7	+	100482833	100482991	100482836	100482991	100482543	100482661	-0.036	0.237588	0.819148	0.548,0.533,0.545	0.574,0.594,0.566	152	149	247,234,192	200,201,157	158,136,117	115,91,88
A3SS1283	ENSG00000087087.19_4	SRRT	chr7	+	100485662	100485764	100485674	100485764	100485323	100485480	0.041	0.032378	0.220466	0.896,0.844,0.884	0.866,0.817,0.817	161	149	427,426,402	46,73,49	223,232,222	32,48,46
A3SS1284	ENSG00000087087.19_4	SRRT	chr7	+	100485877	100486004	100485898	100486004	100485662	100485764	-0.001	1	1	0.995,0.983,0.989	1.0,0.99,0.98	170	149	247,265,199	1,4,2	115,114,111	0,1,2
A3SS1285	ENSG00000163956.10_2	LRPAP1	chr4	-	3521798	3521956	3521798	3521920	3526633	3526778	0	1	1	0.0,0.0,0.005	0.0,0.006,0.0	185	149	0,0,1	212,177,161	0,1,0	143,144,122
A3SS1291	ENSG00000152404.15_3	CWF19L2	chr11	-	107224249	107224462	107224249	107224404	107260799	107260937	0.004	1	1	1.0,1.0,1.0	1.0,1.0,0.987	207	149	110,89,83	0,0,0	56,83,103	0,0,1
A3SS1293	ENSG00000076043.9_3	REXO2	chr11	+	114315262	114315374	114315307	114315374	114314577	114314655	0.001	1	1	0.993,0.997,0.997	0.998,1.0,0.987	194	149	595,515,463	3,1,1	549,487,504	1,0,5
A3SS1294	ENSG00000103460.16_2	TOX3	chr16	-	52497845	52498100	52497845	52498097	52502420	52502486	-0.232	0.0107304	0.100665	0.578,0.855,0.495	1.0,0.696,0.927	152	149	7,12,5	5,2,5	9,7,13	0,3,1
A3SS1295	ENSG00000155366.16_3	RHOC	chr1	-	113247721	113247823	113247721	113247745	113249699	113249724	-0.114	0.0063252	0.0682038	0.938,0.766,0.873	1.0,0.918,1.0	227	149	23,15,21	1,3,2	6,17,21	0,1,0
A3SS1296	ENSG00000099783.11_3	HNRNPM	chr19	+	8530207	8530399	8530363	8530399	8528476	8528570	0.001	1	1	1.0,0.999,0.998	0.996,0.999,1.0	305	149	1638,1504,1291	0,1,1	2273,1798,2147	4,1,0
A3SS1299	ENSG00000101680.14_2	LAMA1	chr18	-	6961584	6961758	6961584	6961691	6961943	6962058	0.035	1	1	1.0,1.0,1.0	0.951,1.0,0.945	216	149	22,36,17	0,0,0	28,23,25	1,0,1
A3SS1300	ENSG00000131748.15_3	STARD3	chr17	+	37813162	37813338	37813260	37813338	37809733	37810003	-0.01	1	1	0.0,0.0,0.0	0.017,0.0,0.014	247	149	0,0,0	49,46,48	1,0,1	34,40,41
A3SS1301	ENSG00000131748.15_3	STARD3	chr17	+	37814225	37814775	37814657	37814775	37814027	37814105	-0.09	0.0896291	0.442263	0.905,0.911,0.788	0.874,1.0,1.0	581	149	37,40,29	1,1,2	27,33,27	1,0,0
A3SS1302	ENSG00000131748.15_3	STARD3	chr17	+	37814657	37814775	37814665	37814775	37814225	37814279	-0.007	1	1	1.0,0.973,0.971	1.0,0.965,1.0	157	149	33,38,35	0,1,1	30,29,44	0,1,0
A3SS1303	ENSG00000131748.15_3	STARD3	chr17	+	37814961	37815073	37814974	37815073	37814657	37814775	-0.018	0.410468	1	0.043,0.047,0.014	0.103,0.013,0.041	162	149	3,4,1	61,74,66	7,1,3	56,68,65
A3SS1304	ENSG00000131748.15_3	STARD3	chr17	+	37816412	37816526	37816463	37816526	37815713	37815806	0.012	0.585819	1	0.008,0.016,0.032	0.01,0.0,0.01	200	149	1,2,3	89,93,68	1,0,1	73,79,73
A3SS1305	ENSG00000108679.12_3	LGALS3BP	chr17	-	76969051	76969425	76969051	76969304	76970769	76970901	0.001	1	1	0.004,0.007,0.009	0.007,0.004,0.006	270	149	4,5,5	500,410,321	4,3,3	319,368,293
A3SS1306	ENSG00000162104.9_2	ADCY9	chr16	-	4042146	4042364	4042146	4042271	4043406	4043511	-0.023	1	1	1.0,0.931,1.0	1.0,1.0,1.0	242	149	84,66,64	0,3,0	52,68,50	0,0,0
A3SS1307	ENSG00000150967.17_4	ABCB9	chr12	-	123413546	123414727	123413546	123414718	123416738	123416875	0.049	1	1	0.146,0.0,0.0	0.0,0.0,0.0	158	149	2,0,0	11,14,9	0,0,0	4,12,11
A3SS1309	ENSG00000150967.17_4	ABCB9	chr12	-	123434334	123434465	123434334	123434451	123434997	123435112	0.041	0.785777	1	0.594,0.681,0.696	1.0,0.116,0.733	163	149	8,7,5	5,3,2	7,1,3	0,7,1
A3SS1310	ENSG00000120798.16_3	NR2C1	chr12	-	95422162	95422300	95422162	95422285	95425124	95425264	-0.015	0.760777	1	0.859,0.84,0.936	0.917,0.896,0.868	164	149	87,52,80	13,9,5	73,76,101	6,8,14
A3SS1311	ENSG00000120798.16_3	NR2C1	chr12	-	95422162	95422300	95422162	95422285	95442843	95443009	-0.028	1	1	1.0,0.909,0.939	1.0,1.0,0.932	164	149	13,11,17	0,1,1	16,17,15	0,0,1
A3SS1314	ENSG00000090006.17_2	LTBP4	chr19	+	41105307	41105462	41105326	41105462	41105102	41105161	0.043	1	1	0.129,0.0,0.0	0.0,0.0,0.0	168	149	2,0,0	12,7,14	0,0,0	18,18,27
A3SS1315	ENSG00000090006.17_2	LTBP4	chr19	+	41122794	41123093	41123005	41123093	41120081	41120352	-0.167	0.0228185	0.172269	0.683,0.431,0.623	0.786,0.752,0.701	360	149	26,22,28	5,12,7	142,110,85	16,15,15
A3SS1317	ENSG00000015171.19_3	ZMYND11	chr10	+	285995	286051	285998	286051	285377	285465	-0.007	1	1	1.0,1.0,0.942	1.0,1.0,0.964	152	149	33,10,33	0,0,2	67,55,55	0,0,2
A3SS1318	ENSG00000100697.14_2	DICER1	chr14	-	95569682	95570463	95569682	95570386	95571407	95571583	0.047	0.560839	1	1.0,1.0,0.943	0.888,0.913,1.0	226	149	25,12,25	0,0,1	24,16,20	2,1,0
A3SS1319	ENSG00000100697.14_2	DICER1	chr14	-	95582789	95583032	95582789	95582917	95583958	95584091	0.031	1	1	1.0,1.0,1.0	1.0,0.908,1.0	264	149	39,17,29	0,0,0	31,35,40	0,2,0
A3SS1320	ENSG00000160201.11_3	U2AF1	chr21	-	44520562	44524512	44520562	44520629	44527560	44527634	-0.013	1	1	1.0,1.0,0.96	1.0,1.0,1.0	4032	149	743,562,656	0,0,1	580,618,708	0,0,0
A3SS1321	ENSG00000137494.13_3	ANKRD42	chr11	+	82923694	82926242	82924020	82926242	82922336	82922472	0.174	0.0793665	0.408764	1.0,0.429,0.834	0.636,0.567,0.537	475	149	47,24,32	0,10,2	39,25,37	7,6,10
A3SS1323	ENSG00000011143.16_3	MKS1	chr17	-	56285465	56285611	56285465	56285535	56285873	56285944	0.051	0.799517	1	0.04,0.249,0.057	0.062,0.089,0.041	225	149	1,4,1	16,8,11	3,4,2	30,27,31
A3SS1324	ENSG00000011143.16_3	MKS1	chr17	-	56292101	56292259	56292101	56292199	56293448	56293604	0.023	0.605543	1	0.0,0.222,0.087	0.092,0.113,0.035	209	149	0,4,2	18,10,15	6,7,2	42,39,39
A3SS1326	ENSG00000178028.13_3	DMAP1	chr1	+	44679334	44679530	44679380	44679530	44679144	44679199	0.051	0.277615	0.904714	0.267,0.167,0.259	0.237,0.138,0.166	195	149	21,16,11	44,61,24	13,9,12	32,43,46
A3SS1327	ENSG00000196367.12_3	TRRAP	chr7	+	98508132	98508230	98508135	98508230	98507678	98508042	0.004	1	1	0.962,1.0,1.0	0.951,1.0,1.0	152	149	26,21,12	1,0,0	20,27,17	1,0,0
A3SS1328	ENSG00000196367.12_3	TRRAP	chr7	+	98563315	98563518	98563318	98563518	98562251	98562398	-0.011	1	1	0.0,0.0,0.0	0.0,0.0,0.033	152	149	0,0,0	32,23,25	0,0,1	31,29,29
A3SS1329	ENSG00000196367.12_3	TRRAP	chr7	+	98591160	98591360	98591214	98591360	98589759	98589850	0.002	0.92222	1	0.766,0.898,0.859	0.852,0.808,0.857	203	149	49,48,58	11,4,7	47,63,57	6,11,7
A3SS1330	ENSG00000175764.14_3	TTLL11	chr9	-	124736287	124736403	124736287	124736393	124737162	124737258	0.116	1	1	1.0,1.0,1.0	0.652,1.0,1.0	159	149	2,1,1	0,0,0	2,2,4	1,0,0
A3SS1331	ENSG00000100577.18_2	GSTZ1	chr14	+	77796573	77796702	77796652	77796702	77796097	77796150	0.189	0.718702	1	0.0,0.0,0.567	0.0,0.0,0.0	228	149	0,0,2	5,4,1	0,0,0	14,29,29
A3SS1333	ENSG00000006534.15_2	ALDH3B1	chr11	+	67786534	67786724	67786638	67786724	67786241	67786362	0.197	6.03839e-12	1.1271e-09	0.187,0.256,0.216	0.033,0.012,0.024	253	149	9,14,7	23,24,15	5,2,3	87,94,73
A3SS1335	ENSG00000134644.15_2	PUM1	chr1	-	31438828	31439125	31438828	31439044	31440013	31440157	-0.133	0.0204698	0.160694	0.582,0.548,0.452	0.649,0.607,0.725	230	149	58,43,42	27,23,33	77,74,65	27,31,16
A3SS1336	ENSG00000134644.15_2	PUM1	chr1	-	31452908	31453013	31452908	31453010	31454158	31454252	-0.037	0.573904	1	0.469,0.433,0.398	0.561,0.413,0.436	152	149	36,28,25	40,36,37	30,23,26	23,32,33
A3SS1337	ENSG00000134644.15_2	PUM1	chr1	-	31452908	31453025	31452908	31453010	31454158	31454252	-0.04	0.0454211	0.275633	0.043,0.025,0.0	0.038,0.028,0.121	164	149	2,1,0	40,36,37	1,1,5	23,32,33
A3SS1338	ENSG00000134644.15_2	PUM1	chr1	-	31452908	31453025	31452908	31453013	31454158	31454252	-0.021	0.676099	1	0.049,0.032,0.0	0.0,0.039,0.104	161	149	2,1,0	36,28,25	0,1,3	29,23,24
A3SS1340	ENSG00000088756.12_2	ARHGAP28	chr18	+	6859806	6859896	6859829	6859896	6851032	6851125	-0.041	1	1	1.0,NA,0.918	1.0,1.0,1.0	172	149	16,0,13	0,0,1	3,5,8	0,0,0
A3SS1341	ENSG00000115652.14_2	UXS1	chr2	-	106781191	106781255	106781191	106781240	106782511	106782539	0.061	0.181446	0.698555	0.277,0.333,0.139	0.152,0.22,0.194	164	149	32,22,13	76,40,73	17,18,18	86,58,68
A3SS1345	ENSG00000185480.11_2	PARPBP	chr12	+	102542007	102542241	102542012	102542241	102517663	102517819	0	0.823736	1	0.883,0.931,0.927	0.891,0.927,0.922	154	149	109,84,92	14,6,7	59,66,61	7,5,5
A3SS1348	ENSG00000164080.13_3	RAD54L2	chr3	+	51671097	51671519	51671176	51671519	51669608	51669805	0.03	1	1	0.0,0.056,0.035	0.0,0.0,0.0	228	149	0,1,1	10,11,18	0,0,0	25,5,9
A3SS1349	ENSG00000228192.7_3	AL512353.1	chr1	-	43310181	43310355	43310181	43310281	43311927	43312058	-0.142	1	1	0.572,1.0,0.786	0.903,1.0,0.88	223	149	4,5,11	2,0,2	14,5,11	1,0,1
A3SS1350	ENSG00000156482.10_2	RPL30	chr8	-	99054872	99055003	99054872	99054946	99057170	99057316	-0.001	0.807032	1	0.966,0.975,0.977	0.98,0.975,0.965	206	149	3338,3425,2740	85,64,47	4176,4033,4179	63,74,109
A3SS1351	ENSG00000140365.15_3	COMMD4	chr15	+	75630916	75631026	75630986	75631026	75630695	75630761	0.022	0.00820267	0.083148	0.011,0.011,0.076	0.017,0.006,0.009	219	149	3,2,14	183,125,116	9,3,4	351,324,303
A3SS1352	ENSG00000140365.15_3	COMMD4	chr15	+	75631325	75631445	75631377	75631445	75630986	75631026	0.01	0.746267	1	1.0,1.0,0.989	0.993,0.993,0.974	201	149	298,264,248	0,0,2	399,360,356	2,2,7
A3SS1356	ENSG00000161513.11_2	FDXR	chr17	-	72860269	72860469	72860269	72860467	72860945	72861053	-0.333	1	1	1.0,0.0,1.0	NA,NA,1.0	151	149	2,0,1	0,1,0	0,0,1	0,0,0
A3SS1357	ENSG00000161513.11_2	FDXR	chr17	-	72860945	72861071	72860945	72861053	72861840	72861942	0.01	1	1	0.023,0.0,0.024	0.0,0.0,0.016	167	149	1,0,1	38,27,37	0,0,1	63,45,56
A3SS1358	ENSG00000161513.11_2	FDXR	chr17	-	72862567	72862690	72862567	72862666	72862905	72862998	0.011	1	1	0.963,1.0,1.0	1.0,0.93,1.0	173	149	30,26,34	1,0,0	55,31,30	0,2,0
A3SS1359	ENSG00000161513.11_2	FDXR	chr17	-	72862905	72863001	72862905	72862998	72868160	72868232	-0.065	0.534814	1	0.134,0.197,0.089	0.032,0.255,0.329	152	149	3,3,2	19,12,20	1,7,4	30,20,8
A3SS1360	ENSG00000161513.11_2	FDXR	chr17	-	72862905	72863020	72862905	72862998	72868160	72868258	0.005	1	1	0.0,0.0,0.042	0.028,0.0,0.0	171	149	0,0,1	19,12,20	1,0,0	30,20,8
A3SS1361	ENSG00000161513.11_2	FDXR	chr17	-	72862905	72863127	72862905	72862998	72868160	72868258	0.023	0.558403	1	0.0,0.082,0.051	0.0,0.0,0.063	278	149	0,2,2	19,12,20	0,0,1	30,20,8
A3SS1362	ENSG00000161513.11_2	FDXR	chr17	-	72862905	72863020	72862905	72863001	72868160	72868258	-0.054	1	1	0.0,0.0,0.307	0.47,0.0,0.0	168	149	0,0,1	3,3,2	1,0,0	1,7,4
A3SS1363	ENSG00000161513.11_2	FDXR	chr17	-	72862905	72863127	72862905	72863001	72868160	72868258	0.166	0.142424	0.597628	0.0,0.265,0.351	0.0,0.0,0.119	275	149	0,2,2	3,3,2	0,0,1	1,7,4
A3SS1364	ENSG00000161513.11_2	FDXR	chr17	-	72862905	72863127	72862905	72863020	72868160	72868258	0.269	1	1	NA,1.0,0.538	0.0,NA,1.0	256	149	0,2,2	0,0,1	0,0,1	1,0,0
A3SS1366	ENSG00000160014.16_2	CALM3	chr19	+	47111453	47111597	47111461	47111597	47109083	47109114	-0.002	1	1	1.0,0.993,1.0	1.0,1.0,1.0	157	149	247,156,184	0,1,0	101,133,141	0,0,0
A3SS1367	ENSG00000160014.16_2	CALM3	chr19	+	47111455	47111597	47111461	47111597	47109083	47109114	-0.022	1	1	1.0,0.935,1.0	1.0,1.0,1.0	155	149	8,15,13	0,1,0	3,5,12	0,0,0
A3SS1368	ENSG00000204257.14_3	HLA-DMA	chr6	-	32917387	32917666	32917387	32917564	32918295	32918580	-0.055	0.0255666	0.187329	0.92,0.947,0.607	0.64,1.0,1.0	251	149	39,30,13	2,1,5	6,11,5	2,0,0
A3SS1369	ENSG00000220785.7_2	MTMR9LP	chr1	-	32700552	32700811	32700552	32700714	32704895	32705026	0.226	0.1672	0.664504	0.232,0.377,0.148	0.0,0.0,0.08	246	149	1,1,2	2,1,7	0,0,1	5,5,7
A3SS1371	ENSG00000138092.10_2	CENPO	chr2	+	25038365	25038625	25038466	25038625	25037244	25037362	-0.003	0.937143	1	0.877,0.845,0.852	0.872,0.888,0.824	250	149	72,64,77	6,7,8	80,53,63	7,4,8
A3SS1372	ENSG00000115568.15_3	ZNF142	chr2	-	219523423	219523599	219523423	219523524	219523702	219523853	-0.078	0.226997	0.799862	1.0,0.78,0.842	0.857,1.0,1.0	224	149	12,16,8	0,3,1	18,19,17	2,0,0
A3SS1374	ENSG00000171490.12_4	RSL1D1	chr16	-	11935551	11935677	11935551	11935674	11935763	11935857	-0.003	1	1	0.987,0.991,0.991	0.991,0.994,0.994	152	149	720,657,555	9,6,5	1093,952,944	10,6,6
A3SS1375	ENSG00000171490.12_4	RSL1D1	chr16	-	11935763	11935857	11935763	11935786	11945264	11945375	0.008	1	1	1.0,1.0,1.0	0.995,0.994,0.988	220	149	340,321,278	0,0,0	566,478,475	2,2,4
A3SS1376	ENSG00000226232.8_2	NPIPB14P	chr16	-	70016252	70016448	70016252	70016397	70016560	70016660	0.125	0.00777004	0.0802657	0.253,0.189,0.041	0.027,0.082,0.0	200	149	5,5,2	11,16,35	1,3,0	27,25,18
A3SS1377	ENSG00000136527.17_2	TRA2B	chr3	-	185636152	185636226	185636152	185636223	185637224	185637284	-0.015	0.0192514	0.153473	0.96,0.968,0.956	0.98,0.979,0.97	152	149	633,464,514	26,15,23	452,438,531	9,9,16
A3SS1380	ENSG00000156304.14_3	SCAF4	chr21	-	33057361	33057553	33057361	33057487	33057710	33057797	-0.003	0.94362	1	0.9,0.698,0.852	0.722,0.919,0.817	215	149	91,50,75	7,15,9	45,49,58	12,3,9
A3SS1382	ENSG00000006015.17_3	C19orf60	chr19	+	18700222	18700493	18700288	18700493	18699804	18699887	0.045	0.194251	0.728171	0.954,0.787,0.769	0.781,0.795,0.799	215	149	30,16,24	1,3,5	67,67,63	13,12,11
A3SS1383	ENSG00000006015.17_3	C19orf60	chr19	+	18701083	18701743	18701663	18701743	18699804	18700493	0.021	0.0299902	0.208125	0.009,0.023,0.054	0.003,0.018,0.003	729	149	1,2,9	23,17,32	2,7,1	120,76,69
A3SS1385	ENSG00000094880.10_2	CDC23	chr5	-	137542235	137542373	137542235	137542369	137548679	137548752	-0.003	1	1	1.0,1.0,0.991	1.0,1.0,1.0	153	149	140,108,117	0,0,1	137,106,108	0,0,0
A3SS1387	ENSG00000161813.21_3	LARP4	chr12	+	50822699	50822873	50822717	50822873	50821544	50821692	0.017	0.363474	1	0.041,0.117,0.088	0.058,0.086,0.05	167	149	11,22,22	231,148,204	11,18,10	159,170,171
A3SS1390	ENSG00000121716.20_4	PILRB	chr7	+	99950995	99951635	99951517	99951635	99950832	99950893	0.028	1	1	1.0,1.0,1.0	0.955,0.962,1.0	671	149	62,48,93	0,0,0	96,114,114	1,1,0
A3SS1391	ENSG00000121716.20_4	PILRB	chr7	+	99954016	99954506	99954372	99954506	99952765	99952863	0.022	0.271307	0.891945	0.038,0.076,0.035	0.024,0.027,0.031	505	149	7,5,5	52,18,41	7,6,9	84,65,83
A3SS1392	ENSG00000121716.20_4	PILRB	chr7	+	99955842	99955989	99955886	99955989	99954372	99954506	0.013	0.427768	1	1.0,1.0,0.968	1.0,0.98,0.949	193	149	29,10,39	0,0,1	48,62,72	0,1,3
A3SS1393	ENSG00000121716.20_4	PILRB	chr7	+	99956312	99956631	99956555	99956631	99955842	99955989	0.028	0.304594	0.951274	0.948,0.965,0.928	0.93,0.869,0.959	392	149	96,73,135	2,1,4	176,122,185	5,7,3
A3SS1394	ENSG00000121716.20_4	PILRB	chr7	+	99956312	99956702	99956521	99956702	99955842	99955989	-0.002	0.933573	1	0.895,0.96,0.959	0.937,0.912,0.97	358	149	82,58,111	4,1,2	143,100,154	4,4,2
A3SS1395	ENSG00000093010.13_3	COMT	chr22	+	19949755	19950338	19950049	19950338	19948721	19948812	0.018	0.141664	0.595826	0.039,0.029,0.093	0.037,0.04,0.031	443	149	10,5,19	82,57,62	19,17,13	166,139,138
A3SS1396	ENSG00000093010.13_3	COMT	chr22	+	19951632	19951822	19951690	19951822	19951088	19951282	0.028	0.0163264	0.137172	0.06,0.08,0.041	0.05,0.024,0.023	207	149	12,18,7	136,150,117	15,7,5	207,203,154
A3SS1397	ENSG00000255036.6_4	AL512590.3	chr9	+	100122263	100122383	100122267	100122383	100119908	100120007	0.193	1	1	1.0,NA,1.0	1.0,1.0,0.422	153	149	2,0,4	0,0,0	1,2,3	0,0,4
A3SS1398	ENSG00000255036.6_4	AL512590.3	chr9	+	100126299	100126410	100126332	100126410	100124644	100124723	0.089	0.613699	1	0.621,0.0,0.45	0.45,0.0,0.353	182	149	2,0,1	1,1,1	2,0,2	2,3,3
A3SS1400	ENSG00000203875.10_2	SNHG5	chr6	-	86387512	86387593	86387512	86387586	86387671	86387750	0.003	0.915082	1	0.994,1.0,0.985	0.98,1.0,0.989	156	149	175,138,136	1,0,2	305,313,360	6,0,4
A3SS1401	ENSG00000203875.10_2	SNHG5	chr6	-	86387512	86387617	86387512	86387586	86387671	86387750	0.017	0.145822	0.608116	0.0,1.0,0.554	0.121,1.0,0.383	180	149	0,4,3	1,0,2	1,4,3	6,0,4
A3SS1402	ENSG00000203875.10_2	SNHG5	chr6	-	86387512	86387617	86387512	86387593	86387671	86387750	0.005	1	1	0.0,0.013,0.019	0.003,0.008,0.007	173	149	0,2,3	175,136,136	1,3,3	305,312,360
A3SS1403	ENSG00000105619.13_3	TFPT	chr19	-	54611332	54611551	54611332	54611514	54611632	54611702	0.005	0.489372	1	0.857,0.967,1.0	1.0,0.898,0.912	186	149	45,37,36	6,1,0	39,22,26	0,2,2
A3SS1406	ENSG00000173611.17_3	SCAI	chr9	-	127733949	127734123	127733949	127734041	127738392	127738465	-0.015	1	1	0.928,0.893,1.0	0.866,1.0,1.0	231	149	20,13,17	1,1,0	10,15,17	1,0,0
A3SS1408	ENSG00000111642.14_2	CHD4	chr12	-	6692192	6692544	6692192	6692279	6696549	6696725	0.002	1	1	1.0,1.0,1.0	0.993,1.0,1.0	414	149	532,388,434	0,0,0	404,340,406	1,0,0
A3SS1409	ENSG00000111642.14_2	CHD4	chr12	-	6692363	6692544	6692363	6692541	6696549	6696725	0.005	0.71383	1	0.94,0.944,0.959	0.945,0.929,0.954	152	149	429,326,360	27,19,15	349,293,320	20,22,15
A3SS1410	ENSG00000111642.14_2	CHD4	chr12	-	6709382	6709561	6709382	6709522	6709699	6709835	-0.109	0.00171458	0.0265933	0.477,0.494,0.529	0.59,0.58,0.656	188	149	138,107,115	120,87,81	138,96,142	76,55,59
A3SS1411	ENSG00000111642.14_2	CHD4	chr12	-	6711125	6711341	6711125	6711320	6711541	6711663	0.02	0.555655	1	0.278,0.37,0.228	0.242,0.211,0.363	170	149	76,93,40	173,139,119	60,35,65	165,115,100
A3SS1413	ENSG00000175634.14_3	RPS6KB2	chr11	+	67196383	67196493	67196452	67196493	67195964	67196094	0.009	1	1	0.008,0.012,0.017	0.0,0.01,0.0	218	149	1,1,1	84,57,39	0,1,0	91,68,90
A3SS1414	ENSG00000175634.14_3	RPS6KB2	chr11	+	67199823	67199963	67199826	67199963	67198838	67198986	0.178	0.266336	0.881759	0.551,1.0,0.495	0.855,0.263,0.395	152	149	5,6,4	4,0,4	6,4,2	1,11,3
A3SS1415	ENSG00000175634.14_3	RPS6KB2	chr11	+	67200596	67200918	67200810	67200918	67200422	67200513	-0.065	0.0127117	0.113358	0.978,0.863,0.884	0.981,1.0,0.939	363	149	108,77,74	1,5,4	127,130,112	1,0,3
A3SS1416	ENSG00000175634.14_3	RPS6KB2	chr11	+	67201465	67201746	67201668	67201746	67200810	67200918	-0.011	1	1	1.0,1.0,0.966	1.0,1.0,1.0	352	149	86,89,68	0,0,1	119,88,144	0,0,0
A3SS1417	ENSG00000071894.16_3	CPSF1	chr8	-	145619097	145619375	145619097	145619253	145619448	145619515	-0.02	1	1	1.0,0.972,0.969	1.0,1.0,1.0	271	149	56,64,56	0,1,1	53,71,71	0,0,0
A3SS1420	ENSG00000164576.11_2	SAP30L	chr5	+	153832961	153833060	153832976	153833060	153826104	153826365	0.135	1	1	1.0,0.932,0.909	0.858,1.0,0.577	164	149	14,15,11	0,1,1	20,5,9	3,0,6
A3SS1421	ENSG00000142528.15_3	ZNF473	chr19	+	50534148	50534348	50534270	50534348	50529149	50529379	-0.06	0.664393	1	0.777,0.72,0.623	0.641,1.0,0.658	271	149	19,14,12	3,3,4	13,8,7	4,0,2
A3SS1423	ENSG00000101997.12_2	CCDC22	chrX	+	49098481	49098614	49098531	49098614	49093552	49093730	-0.035	1	1	1.0,1.0,0.896	1.0,1.0,1.0	199	149	27,13,23	0,0,2	54,30,17	0,0,0
A3SS1424	ENSG00000112511.17_2	PHF1	chr6	+	33380284	33380366	33380292	33380366	33380024	33380199	-0.003	0.64464	1	0.974,0.936,0.991	0.985,0.925,1.0	157	149	119,93,115	3,6,1	70,65,71	1,5,0
A3SS1425	ENSG00000112511.17_2	PHF1	chr6	+	33382731	33382921	33382742	33382921	33382501	33382606	-0.054	0.285735	0.915931	0.385,0.441,0.43	0.391,0.576,0.451	160	149	78,72,72	116,85,89	51,67,52	74,46,59
A3SS1429	ENSG00000125347.13_3	IRF1	chr5	-	131823617	131823744	131823617	131823717	131825083	131825175	0.011	1	1	0.0,0.046,0.0	0.012,0.0,0.0	176	149	0,2,0	54,35,38	1,0,0	70,68,75
A3SS1433	ENSG00000110851.11_2	PRDM4	chr12	-	108138319	108138459	108138319	108138438	108140051	108140201	0.026	0.201105	0.741542	0.108,0.078,0.076	0.063,0.045,0.076	170	149	13,6,8	94,62,85	8,3,7	105,56,75
A3SS1437	ENSG00000107223.12_2	EDF1	chr9	-	139756570	139756948	139756570	139756797	139757357	139757451	0.041	0.000151198	0.00407181	0.149,0.143,0.155	0.115,0.097,0.111	300	149	335,333,324	952,993,878	318,231,245	1212,1070,979
A3SS1438	ENSG00000087191.12_3	PSMC5	chr17	+	61905033	61905283	61905210	61905283	61904819	61904874	0.09	0.0406664	0.258319	1.0,1.0,0.828	0.846,0.92,0.792	326	149	16,9,21	0,0,2	12,25,25	1,1,3
A3SS1439	ENSG00000087191.12_3	PSMC5	chr17	+	61905497	61906923	61906853	61906923	61904819	61904874	-0.017	1	1	1.0,1.0,0.95	1.0,1.0,1.0	1505	149	500,408,381	0,0,2	370,400,418	0,0,0
A3SS1440	ENSG00000087191.12_3	PSMC5	chr17	+	61908379	61908586	61908395	61908586	61908168	61908295	0.002	1	1	0.009,0.009,0.016	0.018,0.002,0.009	165	149	6,5,8	622,504,449	9,1,5	449,450,508
A3SS1441	ENSG00000127586.16_2	CHTF18	chr16	+	838927	839125	838930	839125	838624	838775	-0.027	0.744951	1	0.053,0.057,0.041	0.019,0.0,0.213	152	149	4,3,3	70,49,68	1,0,8	51,47,29
A3SS1442	ENSG00000127586.16_2	CHTF18	chr16	+	840006	840269	840176	840269	839546	839715	0.005	0.171013	0.675689	0.068,0.019,0.042	0.052,0.0,0.063	319	149	5,1,3	32,24,32	2,0,1	17,14,7
A3SS1443	ENSG00000127586.16_2	CHTF18	chr16	+	840330	840399	840346	840399	840176	840269	-0.039	0.311418	0.965105	0.0,0.0,0.0	0.079,0.038,0.0	165	149	0,0,0	43,33,45	2,1,0	21,23,13
A3SS1444	ENSG00000127586.16_2	CHTF18	chr16	+	840524	840666	840530	840666	840346	840399	-0.009	1	1	1.0,1.0,0.973	1.0,1.0,1.0	155	149	32,31,37	0,0,1	17,18,13	0,0,0
A3SS1446	ENSG00000127586.16_2	CHTF18	chr16	+	844039	844201	844053	844201	843143	843274	-0.011	1	1	0.0,0.0,0.0	0.033,0.0,0.0	163	149	0,0,0	49,40,26	1,0,0	27,25,21
A3SS1447	ENSG00000163874.10_3	ZC3H12A	chr1	+	37947950	37948141	37948034	37948141	37947201	37947436	0.037	0.0576021	0.328556	0.063,0.079,0.095	0.068,0.059,0.0	233	149	6,8,9	57,60,55	5,4,0	44,41,40
A3SS1449	ENSG00000178999.12_3	AURKB	chr17	-	8110493	8110688	8110493	8110685	8110888	8110943	0.009	0.505947	1	0.08,0.032,0.052	0.04,0.027,0.069	152	149	15,6,8	170,179,142	10,6,16	238,212,213
A3SS1450	ENSG00000178999.12_3	AURKB	chr17	-	8111055	8111219	8111055	8111158	8113847	8113899	0.062	0.382005	1	0.336,0.114,0.213	0.124,0.162,0.191	210	149	10,4,8	14,22,21	5,6,8	25,22,24
A3SS1455	ENSG00000147526.19_3	TACC1	chr8	+	38699804	38699965	38699807	38699965	38697741	38697785	0.017	0.389453	1	0.981,0.966,1.0	0.951,0.945,1.0	152	149	107,87,58	2,3,0	60,53,55	3,3,0
A3SS1459	ENSG00000078808.16_2	SDF4	chr1	-	1154148	1154323	1154148	1154307	1158623	1158737	0.001	1	1	0.019,0.005,0.006	0.007,0.003,0.016	165	149	8,2,2	380,362,282	2,1,5	270,259,274
A3SS1460	ENSG00000078808.16_2	SDF4	chr1	-	1154148	1154385	1154148	1154307	1158623	1158737	0.003	1	1	0.01,0.007,0.005	0.007,0.005,0.0	227	149	6,4,2	380,362,282	3,2,0	270,259,274
A3SS1461	ENSG00000078808.16_2	SDF4	chr1	-	1154148	1154385	1154148	1154323	1158623	1158737	0.082	0.31658	0.972275	0.346,0.585,0.414	0.514,0.585,0.0	211	149	6,4,2	8,2,2	3,2,0	2,1,5
A3SS1466	ENSG00000188566.13_3	NDOR1	chr9	+	140109858	140109973	140109879	140109973	140109546	140109654	0.011	1	1	1.0,1.0,1.0	1.0,1.0,0.967	170	149	12,13,7	0,0,0	33,15,33	0,0,1
A3SS1467	ENSG00000188566.13_3	NDOR1	chr9	+	140110518	140110640	140110545	140110640	140110350	140110469	-0.011	0.455433	1	0.128,0.037,0.063	0.11,0.066,0.086	176	149	4,1,2	23,22,25	7,3,4	48,36,36
A3SS1468	ENSG00000152042.13	NBPF11	chr1	-	146039795	146039923	146039795	146039847	146040889	146041053	-0.398	1	1	0.0,0.0,0.0	NA,NA,0.398	225	149	0,0,0	5,2,5	0,0,1	0,0,1
A3SS1470	ENSG00000231346.5_2	LINC01160	chr1	-	112144813	112144955	112144813	112144877	112146990	112147122	0.302	1	1	NA,1.0,NA	0.396,1.0,NA	227	149	0,1,0	0,0,0	1,3,0	1,0,0
A3SS1471	ENSG00000130204.12_4	TOMM40	chr19	+	45394663	45394946	45394666	45394946	45394476	45394571	0.018	0.491145	1	0.927,0.937,0.704	0.751,0.87,0.893	152	149	65,61,34	5,4,14	40,41,51	13,6,6
A3SS1472	ENSG00000008952.16_2	SEC62	chr3	+	169700424	169700699	169700447	169700699	169694733	169694839	-0.042	0.00185909	0.0278761	0.776,0.634,0.464	1.0,0.0,1.0	172	149	4,4,6	1,2,6	1,0,6	0,1,0
A3SS1473	ENSG00000008952.16_2	SEC62	chr3	+	169700424	169700699	169700494	169700699	169694733	169694839	0.003	1	1	0.004,0.005,0.006	0.001,0.0,0.004	219	149	6,6,8	1095,805,925	1,0,6	1181,929,928
A3SS1474	ENSG00000008952.16_2	SEC62	chr3	+	169700447	169700699	169700494	169700699	169694733	169694839	0.004	1	1	0.002,0.004,0.007	0.0,0.001,0.0	196	149	3,4,8	1095,805,925	0,1,0	1181,929,928
A3SS1475	ENSG00000160352.11	ZNF714	chr19	+	21281617	21281716	21281620	21281716	21280990	21281117	0.085	0.349748	1	0.606,0.831,0.611	0.638,0.459,0.696	152	149	11,15,16	7,3,10	9,13,14	5,15,6
A3SS1476	ENSG00000198826.10_3	ARHGAP11A	chr15	+	32925179	32925309	32925263	32925309	32921795	32921963	-0.047	0.0179559	0.147324	0.872,0.89,0.882	0.958,0.909,0.918	233	149	214,164,199	20,13,17	251,250,299	7,16,17
A3SS1477	ENSG00000130600.17_3	H19	chr11	-	2016405	2017024	2016405	2017018	2017105	2017228	0	0.932297	1	0.889,0.913,0.906	0.9,0.929,0.878	155	149	656,626,530	79,57,53	508,436,374	54,32,50
A3SS1478	ENSG00000130600.17_3	H19	chr11	-	2016405	2017228	2016405	2017024	2017308	2017421	0.177	6.46549e-12	1.16659e-09	0.891,0.9,0.857	0.642,0.731,0.743	353	149	521,426,399	27,20,28	357,348,329	84,54,48
A3SS1479	ENSG00000130600.17_3	H19	chr11	-	2017105	2017228	2017105	2017171	2017308	2017421	0.001	1	1	0.995,0.995,1.0	0.996,0.995,0.995	206	149	862,759,678	3,3,0	659,591,532	2,2,2
A3SS1480	ENSG00000132635.16_2	PCED1A	chr20	-	2819489	2819728	2819489	2819575	2819837	2819917	-0.031	0.956136	1	0.871,0.893,0.89	0.863,1.0,0.883	302	149	41,34,49	3,2,3	51,42,46	4,0,3
A3SS1482	ENSG00000138363.14_3	ATIC	chr2	+	216189902	216190052	216189963	216190052	216184387	216184454	-0.001	1	1	0.005,0.0,0.0	0.003,0.0,0.004	210	149	1,0,0	141,92,108	1,0,1	213,178,186
A3SS1483	ENSG00000176531.10_2	PHLDB3	chr19	-	43983528	43983745	43983528	43983643	43990417	43990474	-0.018	1	1	0.947,1.0,1.0	1.0,1.0,1.0	251	149	30,41,29	1,0,0	15,21,11	0,0,0
A3SS1484	ENSG00000176531.10_2	PHLDB3	chr19	-	43999646	43999772	43999646	43999757	44001269	44001431	0.012	1	1	0.0,0.036,0.0	0.0,0.0,0.0	164	149	0,1,0	33,24,30	0,0,0	23,26,18
A3SS1487	ENSG00000104047.14_2	DTWD1	chr15	+	49923152	49923255	49923197	49923255	49917309	49917628	-0.026	0.570859	1	0.0,0.0,0.0	0.079,0.0,0.0	194	149	0,0,0	7,3,7	3,0,0	27,13,18
A3SS1488	ENSG00000104047.14_2	DTWD1	chr15	+	49924355	49924499	49924367	49924499	49917309	49917628	-0.009	1	1	1.0,0.972,1.0	1.0,1.0,1.0	161	149	98,74,80	0,2,0	81,98,122	0,0,0
A3SS1489	ENSG00000102543.14_2	CDADC1	chr13	+	49833481	49833659	49833621	49833659	49829974	49830049	-0.211	9.28856e-07	5.48485e-05	0.497,0.635,0.623	0.785,0.743,0.861	289	149	140,128,138	73,38,43	184,112,168	26,20,14
A3SS1490	ENSG00000168216.10_3	LMBRD1	chr6	-	70410656	70410761	70410656	70410694	70411334	70411437	-0.024	0.735643	1	0.981,0.959,0.989	1.0,1.0,1.0	216	149	147,135,135	2,4,1	108,105,104	0,0,0
A3SS1491	ENSG00000131269.15_2	ABCB7	chrX	-	74291343	74291539	74291343	74291518	74293523	74293611	0.001	1	1	0.011,0.0,0.014	0.0,0.0,0.023	170	149	1,0,1	77,66,60	0,0,2	83,81,73
A3SS1493	ENSG00000197386.10_2	HTT	chr4	+	3209007	3209084	3209012	3209084	3208533	3208710	-0.014	0.491738	1	0.943,0.892,1.0	0.941,1.0,0.937	154	149	17,17,28	1,2,0	33,22,31	2,0,2
A3SS1494	ENSG00000186807.9	ANXA8L2	chr10	+	47752290	47752499	47752404	47752499	47751144	47751235	0.006	0.957849	1	0.027,0.027,0.02	0.008,0.027,0.022	263	149	3,3,2	62,62,56	3,6,5	206,121,127
A3SS1495	ENSG00000175048.16_3	ZDHHC14	chr6	+	158093755	158094561	158093800	158094561	158074556	158074659	0.079	0.291265	0.929063	0.852,0.74,0.578	0.723,0.676,0.535	194	149	45,37,25	6,10,14	17,19,18	5,7,12
A3SS1496	ENSG00000258366.7_3	RTEL1	chr20	+	62293748	62293980	62293826	62293980	62293202	62293296	0.5	1	1	1.0,NA,0.0	NA,NA,0.0	227	149	1,0,0	0,0,2	0,0,0	0,0,3
A3SS1497	ENSG00000258366.7_3	RTEL1	chr20	+	62293748	62293980	62293898	62293980	62293202	62293296	0.011	1	1	0.032,0.0,0.0	0.0,0.0,0.0	299	149	1,0,0	15,6,12	0,0,0	13,15,10
A3SS1498	ENSG00000258366.7_3	RTEL1	chr20	+	62293826	62293980	62293898	62293980	62293202	62293296	-0.022	0.809101	1	0.0,0.0,0.101	0.0,0.0,0.168	221	149	0,0,2	15,6,12	0,0,3	13,15,10
A3SS1499	ENSG00000258366.7_3	RTEL1	chr20	+	62325671	62325841	62325724	62325841	62324495	62324636	0.025	1	1	0.054,0.076,0.0	0.0,0.054,0.0	202	149	1,1,0	13,9,22	0,1,0	17,13,17
A3SS1501	ENSG00000108479.11_2	GALK1	chr17	-	73759094	73759262	73759094	73759230	73759400	73759520	0.011	1	1	0.0,0.0,0.032	0.0,0.0,0.0	181	149	0,0,1	41,35,25	0,0,0	18,8,8
A3SS1502	ENSG00000129219.13_2	PLD2	chr17	+	4721296	4721680	4721591	4721680	4720440	4720554	-0.057	1	1	1.0,1.0,0.83	1.0,1.0,1.0	444	149	36,40,29	0,0,2	34,26,36	0,0,0
A3SS1504	ENSG00000129103.17_3	SUMF2	chr7	+	56141806	56141911	56141866	56141911	56140689	56140804	0.008	1	1	0.0,0.019,0.021	0.011,0.005,0.0	209	149	0,2,2	95,72,65	2,1,0	132,143,124
A3SS1505	ENSG00000071189.21_2	SNX13	chr7	-	17861131	17861304	17861131	17861271	17865644	17865714	0.02	0.410757	1	0.066,0.076,0.098	0.031,0.149,0.0	182	149	2,1,2	23,10,15	1,3,0	26,14,30
A3SS1506	ENSG00000071189.21_2	SNX13	chr7	-	17931168	17931258	17931168	17931251	17932954	17933057	-0.017	1	1	0.949,1.0,1.0	1.0,1.0,1.0	156	149	39,23,25	2,0,0	30,33,23	0,0,0
A3SS1507	ENSG00000089639.10_2	GMIP	chr19	-	19746223	19746530	19746223	19746378	19747515	19747605	-0.395	0.000602879	0.0120866	0.257,0.331,0.24	0.536,0.832,0.645	301	149	7,4,7	10,4,11	14,10,11	6,1,3
A3SS1508	ENSG00000089639.10_2	GMIP	chr19	-	19747515	19747605	19747515	19747596	19747725	19747838	0.107	0.208096	0.758975	0.675,0.739,0.9	0.748,0.485,0.759	158	149	11,9,19	5,3,2	22,8,10	7,8,3
A3SS1509	ENSG00000187689.9_2	AMTN	chr4	+	71388471	71388555	71388474	71388555	71384479	71384548	-0.299	1	1	1.0,0.0,0.495	NA,1.0,0.595	152	149	3,0,2	0,1,2	0,2,3	0,0,2
A3SS1512	ENSG00000131503.20_1	ANKHD1	chr5	+	139818045	139818202	139818078	139818202	139815688	139815842	-0.024	0.0977105	0.470558	0.968,0.986,0.931	0.971,0.987,1.0	182	149	110,87,66	3,1,4	81,93,64	2,1,0
A3SS1513	ENSG00000131503.20_1	ANKHD1	chr5	+	139818045	139818202	139818087	139818202	139815688	139815842	-0.145	0.0007327	0.0141007	0.766,0.759,0.609	0.829,0.859,0.88	191	149	113,89,68	27,22,34	81,94,66	13,12,7
A3SS1514	ENSG00000131503.20_1	ANKHD1	chr5	+	139818078	139818202	139818087	139818202	139815688	139815842	-0.015	0.660467	1	0.173,0.114,0.143	0.127,0.136,0.212	158	149	6,3,6	27,22,34	2,2,2	13,12,7
A3SS1515	ENSG00000131503.20_1	ANKHD1	chr5	+	139866542	139866645	139866590	139866645	139865173	139865317	0.072	0.0444035	0.271896	0.937,0.932,0.931	0.874,0.808,0.903	197	149	79,54,71	4,3,4	55,39,86	6,7,7
A3SS1516	ENSG00000131503.20_1	ANKHD1	chr5	+	139916922	139917174	139916973	139917174	139907768	139909381	0.052	0.770218	1	0.874,0.825,0.891	0.829,0.691,0.913	200	149	28,19,22	3,3,2	13,9,14	2,3,1
A3SS1517	ENSG00000131503.20_1	ANKHD1	chr5	+	139916922	139917174	139916973	139917174	139914946	139915123	0.116	0.0182836	0.14877	0.774,0.955,0.761	0.797,0.665,0.681	200	149	138,86,64	30,3,15	74,64,86	14,24,30
A3SS1518	ENSG00000116918.13_3	TSNAX	chr1	+	231678205	231678357	231678226	231678357	231672958	231673073	0.001	1	1	0.0,0.011,0.0	0.007,0.0,0.0	170	149	0,2,0	250,152,194	2,0,0	259,204,243
A3SS1519	ENSG00000164134.12_2	NAA15	chr4	+	140305985	140306132	140305988	140306132	140299909	140300008	0.031	0.180314	0.69767	0.918,0.87,0.88	0.858,0.816,0.9	152	149	149,82,97	13,12,13	99,86,92	16,19,10
A3SS1521	ENSG00000182134.15_3	TDRKH	chr1	-	151752426	151752616	151752426	151752604	151753956	151754063	0.014	0.412193	1	0.973,0.724,0.89	0.852,0.878,0.815	161	149	39,17,35	1,6,4	31,31,38	5,4,8
A3SS1523	ENSG00000085999.11_3	RAD54L	chr1	+	46726932	46727057	46726935	46727057	46726398	46726687	-0.024	0.789264	1	0.929,1.0,1.0	1.0,1.0,1.0	152	149	40,30,35	3,0,0	73,58,72	0,0,0
A3SS1529	ENSG00000179532.12_3	DNHD1	chr11	+	6519000	6520191	6519952	6520191	6518814	6518897	0.068	1	1	1.0,1.0,1.0	0.797,1.0,1.0	1101	149	6,7,22	0,0,0	29,20,28	1,0,0
A3SS1530	ENSG00000179532.12_3	DNHD1	chr11	+	6566021	6568896	6566106	6568896	6565803	6565901	-0.088	0.0428443	0.265959	1.0,0.0,0.718	0.489,0.656,0.836	234	149	6,0,4	0,1,1	3,6,8	2,2,1
A3SS1532	ENSG00000179532.12_3	DNHD1	chr11	+	6588124	6589090	6588154	6589090	6586924	6587995	-0.357	9.1296e-05	0.0027153	0.714,0.333,0.625	1.0,1.0,0.744	179	149	3,3,2	1,5,1	6,9,7	0,0,2
A3SS1538	ENSG00000160789.19_2	LMNA	chr1	+	156105651	156105912	156105691	156105912	156104977	156105103	0.003	1	1	0.009,0.012,0.007	0.011,0.004,0.004	189	149	17,22,11	1471,1441,1190	18,5,6	1226,1112,1307
A3SS1539	ENSG00000134779.14_2	TPGS2	chr18	-	34366535	34367042	34366535	34366945	34378411	34378572	0.027	0.0544641	0.314636	0.978,1.0,0.911	0.936,0.941,0.93	246	149	73,49,51	1,0,3	120,106,110	5,4,5
A3SS1540	ENSG00000134779.14_2	TPGS2	chr18	-	34366535	34367042	34366535	34366945	34380160	34380274	-0.049	1	1	1.0,0.852,1.0	1.0,1.0,1.0	246	149	30,19,22	0,2,0	36,22,28	0,0,0
A3SS1542	ENSG00000134779.14_2	TPGS2	chr18	-	34398856	34398955	34398856	34398936	34403765	34403834	0.228	1	1	0.228,NA,NA	0.0,NA,0.0	168	149	1,0,0	3,0,0	0,0,0	4,0,1
A3SS1544	ENSG00000108509.20_3	CAMTA2	chr17	-	4872201	4872276	4872201	4872274	4872444	4872632	-0.001	1	1	0.983,1.0,0.991	1.0,1.0,0.977	151	149	114,73,107	2,0,1	107,85,127	0,0,3
A3SS1545	ENSG00000108509.20_3	CAMTA2	chr17	-	4884972	4885126	4884972	4885037	4886051	4886187	-0.057	0.347383	1	0.662,0.758,0.944	0.883,0.653,1.0	238	149	25,30,27	8,6,1	24,15,16	2,5,0
A3SS1546	ENSG00000108509.20_3	CAMTA2	chr17	-	4885383	4885470	4885383	4885455	4886051	4886187	0.042	0.666695	1	0.04,0.398,0.102	0.098,0.254,0.061	164	149	1,8,3	22,11,24	3,6,2	25,16,28
A3SS1547	ENSG00000108509.20_3	CAMTA2	chr17	-	4885383	4885522	4885383	4885455	4886051	4886187	0.202	0.0066544	0.0710459	0.305,0.516,0.287	0.052,0.341,0.11	216	149	14,17,14	22,11,24	2,12,5	25,16,28
A3SS1548	ENSG00000108509.20_3	CAMTA2	chr17	-	4885383	4885522	4885383	4885470	4886051	4886187	0.223	0.176906	0.690407	0.912,0.629,0.828	0.331,0.62,0.748	201	149	14,16,13	1,7,2	2,11,4	3,5,1
A3SS1552	ENSG00000115602.16_3	IL1RL1	chr2	+	102959495	102959637	102959537	102959637	102958682	102958754	0.001	0.667039	1	0.817,0.669,0.459	0.163,1.0,0.778	191	149	40,57,25	7,22,23	1,4,9	4,0,2
A3SS1553	ENSG00000145868.16_2	FBXO38	chr5	+	147778561	147778695	147778577	147778695	147774274	147774467	-0.004	1	1	1.0,0.968,1.0	0.981,1.0,1.0	165	149	47,34,28	0,1,0	57,60,49	1,0,0
A3SS1557	ENSG00000143842.14_3	SOX13	chr1	+	204090998	204091113	204091027	204091113	204086720	204086835	0.009	0.615081	1	0.023,0.011,0.035	0.042,0.0,0.0	178	149	2,1,3	71,73,69	2,0,0	38,49,57
A3SS1558	ENSG00000198265.11_3	HELZ	chr17	-	65156376	65156481	65156376	65156478	65157012	65157192	-0.133	0.351398	1	0.475,0.269,0.123	0.495,0.462,0.308	152	149	12,6,2	13,16,14	4,7,5	4,8,11
A3SS1560	ENSG00000123737.12_3	EXOSC9	chr4	+	122734909	122735202	122735020	122735202	122732737	122732826	-0.174	0.135144	0.576919	0.301,0.364,0.622	0.534,0.741,0.534	260	149	15,12,23	20,12,8	8,10,10	4,2,5
A3SS1569	ENSG00000113648.16_2	H2AFY	chr5	-	134696186	134696297	134696186	134696294	134705095	134705293	-0.023	0.407973	1	0.43,0.392,0.362	0.433,0.398,0.421	152	149	289,226,159	375,343,275	338,262,284	433,388,383
A3SS1570	ENSG00000113648.16_2	H2AFY	chr5	-	134696186	134696470	134696186	134696294	134705095	134705293	-0.001	1	1	0.004,0.007,0.005	0.004,0.009,0.006	325	149	3,5,3	375,343,275	4,8,5	433,388,383
A3SS1571	ENSG00000113648.16_2	H2AFY	chr5	-	134696186	134696470	134696186	134696297	134705095	134705293	-0.001	1	1	0.005,0.01,0.009	0.005,0.014,0.008	322	149	3,5,3	289,226,159	4,8,5	338,262,284
A3SS1573	ENSG00000109501.13_3	WFS1	chr4	+	6296731	6296916	6296767	6296916	6293643	6293724	0.008	1	1	0.0,0.025,0.0	0.0,0.0,0.0	185	149	0,1,0	46,31,24	0,0,0	10,11,14
A3SS1574	ENSG00000142546.13_4	NOSIP	chr19	-	50059805	50059993	50059805	50059914	50060131	50060250	-0.011	0.703339	1	0.988,0.981,0.99	1.0,0.992,1.0	228	149	372,400,302	3,5,2	218,188,213	0,1,0
A3SS1575	ENSG00000142546.13_4	NOSIP	chr19	-	50060346	50061202	50060346	50060506	50062153	50062230	-0.002	1	1	0.001,0.0,0.003	0.002,0.002,0.005	845	149	3,1,7	521,425,369	4,3,9	349,311,328
A3SS1576	ENSG00000142546.13_4	NOSIP	chr19	-	50060346	50061456	50060346	50060506	50062153	50062235	-0.001	1	1	0.002,0.001,0.004	0.002,0.002,0.005	1099	149	6,4,10	521,425,369	5,4,13	349,311,328
A3SS1577	ENSG00000142546.13_4	NOSIP	chr19	-	50060346	50062235	50060346	50060506	50063190	50063296	-0.129	1.16425e-05	0.00046339	0.864,0.823,0.83	1.0,0.967,0.937	1878	149	562,468,432	7,8,7	410,369,375	0,1,2
A3SS1578	ENSG00000142546.13_4	NOSIP	chr19	-	50062153	50062235	50062153	50062230	50063190	50063296	0.007	0.957287	1	0.998,0.993,0.993	0.99,0.973,1.0	154	149	562,463,423	1,3,3	409,366,361	4,10,0
A3SS1581	ENSG00000197858.10_2	GPAA1	chr8	+	145138841	145138943	145138883	145138943	145138616	145138764	0.008	1	1	1.0,1.0,1.0	1.0,0.987,0.988	191	149	114,94,59	0,0,0	95,100,106	0,1,1
A3SS1582	ENSG00000197858.10_2	GPAA1	chr8	+	145139013	145139233	145139036	145139233	145138841	145138943	0	1	1	0.027,0.0,0.0	0.0,0.009,0.017	172	149	3,0,0	93,76,43	0,1,2	100,99,100
A3SS1583	ENSG00000197858.10_2	GPAA1	chr8	+	145139013	145139233	145139188	145139233	145138841	145138943	-0.087	0.0025488	0.0347522	0.945,0.827,0.967	1.0,1.0,1.0	324	149	75,52,64	2,5,1	56,53,64	0,0,0
A3SS1584	ENSG00000197858.10_2	GPAA1	chr8	+	145139036	145139233	145139188	145139233	145138841	145138943	-0.039	0.0871219	0.434246	0.976,0.927,0.981	1.0,1.0,1.0	301	149	165,128,107	2,5,1	156,151,162	0,0,0
A3SS1585	ENSG00000197858.10_2	GPAA1	chr8	+	145139624	145140382	145140191	145140382	145139315	145139512	-0.034	1	1	1.0,1.0,0.898	1.0,1.0,1.0	716	149	81,91,85	0,0,2	107,90,103	0,0,0
A3SS1586	ENSG00000155229.20_3	MMS19	chr10	-	99219118	99219283	99219118	99219262	99219415	99219498	0.018	1	1	0.972,1.0,0.965	0.939,0.98,0.963	170	149	39,31,31	1,0,1	53,56,59	3,1,2
A3SS1587	ENSG00000155229.20_3	MMS19	chr10	-	99221252	99221653	99221252	99221379	99221773	99221876	0.011	1	1	1.0,1.0,1.0	1.0,0.967,1.0	423	149	58,39,45	0,0,0	86,84,82	0,1,0
A3SS1588	ENSG00000155229.20_3	MMS19	chr10	-	99225815	99225916	99225815	99225913	99226260	99226342	-0.094	0.0292315	0.204168	0.877,0.679,0.906	0.949,0.831,0.964	152	149	51,28,49	7,13,5	115,70,83	6,14,3
A3SS1589	ENSG00000155229.20_3	MMS19	chr10	-	99227261	99227360	99227261	99227340	99228008	99228163	0.065	0.0475428	0.2869	0.101,0.068,0.194	0.099,0.03,0.039	169	149	6,3,9	47,36,33	8,2,2	64,57,43
A3SS1590	ENSG00000155229.20_3	MMS19	chr10	-	99227261	99227360	99227261	99227340	99229402	99229480	0.514	1	1	1.0,0.0,1.0	NA,0.306,0.0	169	149	1,0,1	0,1,0	0,2,0	0,4,1
A3SS1591	ENSG00000155229.20_3	MMS19	chr10	-	99230531	99230618	99230531	99230591	99236439	99236501	0.009	1	1	1.0,1.0,1.0	1.0,0.972,1.0	176	149	53,34,61	0,0,0	67,83,68	0,2,0
A3SS1593	ENSG00000155229.20_3	MMS19	chr10	-	99237103	99237173	99237103	99237161	99237611	99237686	0.017	0.36513	1	0.978,1.0,0.966	1.0,0.986,0.907	161	149	48,29,31	1,0,1	70,75,53	0,1,5
A3SS1597	ENSG00000023041.11_3	ZDHHC6	chr10	-	114203272	114203364	114203272	114203352	114204927	114205408	-0.021	0.162441	0.651329	0.958,0.931,0.93	0.981,0.974,0.927	161	149	268,203,202	11,14,14	165,162,207	3,4,15
A3SS1599	ENSG00000106348.16_3	IMPDH1	chr7	-	128040148	128040258	128040148	128040236	128040386	128040590	0.003	0.743944	1	0.021,0.012,0.03	0.024,0.014,0.016	171	149	4,2,4	159,149,113	4,2,2	143,123,107
A3SS1600	ENSG00000106348.16_3	IMPDH1	chr7	-	128040386	128040593	128040386	128040590	128040870	128040945	-0.008	1	1	1.0,0.991,0.964	1.0,0.987,0.991	152	149	130,114,108	0,1,4	88,77,110	0,1,1
A3SS1602	ENSG00000106348.16_3	IMPDH1	chr7	-	128049342	128049538	128049342	128049406	128049809	128050036	-0.129	1	1	1.0,1.0,0.614	1.0,NA,1.0	281	149	5,5,6	0,0,2	6,0,5	0,0,0
A3SS1603	ENSG00000106348.16_3	IMPDH1	chr7	-	128049342	128049538	128049342	128049420	128049809	128050036	-0.139	1	1	0.582,1.0,1.0	1.0,NA,1.0	267	149	5,5,6	2,0,0	6,0,5	0,0,0
A3SS1604	ENSG00000116977.18_2	LGALS8	chr1	+	236702178	236702389	236702185	236702389	236700796	236700885	0.049	0.000103077	0.00301599	1.0,1.0,0.975	0.972,0.893,0.962	156	149	97,105,83	0,0,2	109,96,106	3,11,4
A3SS1607	ENSG00000070367.15_2	EXOC5	chr14	-	57713428	57713576	57713428	57713545	57714335	57714430	0.026	0.0737784	0.393073	0.987,0.985,0.975	0.954,0.984,0.93	180	149	92,80,93	1,1,2	76,75,64	3,1,4
A3SS1610	ENSG00000168807.16_3	SNTB2	chr16	+	69293952	69294163	69294073	69294163	69279504	69279718	0.026	0.815491	1	0.949,1.0,1.0	0.968,1.0,0.904	270	149	67,62,78	2,0,0	54,32,34	1,0,2
A3SS1611	ENSG00000137834.14_3	SMAD6	chr15	+	67009346	67009478	67009349	67009478	67008758	67008836	-0.071	1	1	0.0,0.0,0.282	0.495,0.0,0.0	152	149	0,0,2	6,3,5	1,0,0	1,6,1
A3SS1613	ENSG00000163904.12_3	SENP2	chr3	+	185316745	185316812	185316779	185316812	185316199	185316333	-0.028	0.437096	1	1.0,0.966,0.929	1.0,1.0,0.978	183	149	40,35,32	0,1,2	41,22,55	0,0,1
A3SS1614	ENSG00000100601.9_3	ALKBH1	chr14	-	78141998	78142192	78141998	78142137	78146222	78146313	-0.048	0.0762004	0.400479	0.901,0.911,0.906	0.927,1.0,0.936	204	149	50,42,53	4,3,4	52,44,40	3,0,2
A3SS1616	ENSG00000110660.14_4	SLC35F2	chr11	-	107661716	107663526	107661716	107663519	107673726	107673881	0.008	1	1	0.983,1.0,1.0	0.985,0.984,0.99	156	149	120,66,72	2,0,0	71,65,101	1,1,1
A3SS1618	ENSG00000132561.13_3	MATN2	chr8	+	99045269	99045404	99045326	99045404	99044473	99044545	0.338	1	1	1.0,1.0,1.0	0.325,1.0,NA	206	149	13,6,7	0,0,0	2,2,0	3,0,0
A3SS1619	ENSG00000128739.21_3	SNRPN	chr15	+	25219434	25219603	25219457	25219603	25213078	25213229	0.002	1	1	0.009,0.004,0.011	0.003,0.009,0.005	172	149	3,1,3	271,220,233	1,2,1	254,188,181
A3SS1620	ENSG00000128739.21_3	SNRPN	chr15	+	25219434	25219603	25219533	25219603	25213078	25213229	-0.081	8.27379e-05	0.00248811	0.931,0.853,0.891	1.0,0.961,0.958	248	149	112,106,95	5,11,7	93,83,75	0,2,2
A3SS1621	ENSG00000128739.21_3	SNRPN	chr15	+	25219434	25219603	25219544	25219603	25213078	25213229	-0.072	5.7382e-05	0.00192235	0.882,0.895,0.939	0.985,0.965,0.981	259	149	143,133,107	11,9,4	115,96,90	1,2,1
A3SS1622	ENSG00000128739.21_3	SNRPN	chr15	+	25219457	25219603	25219533	25219603	25213078	25213229	-0.026	0.000794349	0.0150343	0.981,0.951,0.968	1.0,0.989,0.988	225	149	380,325,325	5,11,7	346,269,255	0,2,2
A3SS1623	ENSG00000128739.21_3	SNRPN	chr15	+	25219457	25219603	25219544	25219603	25213078	25213229	-0.026	0.000522028	0.0107036	0.959,0.961,0.982	0.996,0.989,0.994	236	149	411,352,337	11,9,4	368,282,270	1,2,1
A3SS1624	ENSG00000128739.21_3	SNRPN	chr15	+	25219533	25219603	25219544	25219603	25213078	25213229	-0.134	0.00116888	0.0198967	0.753,0.797,0.816	0.953,0.875,0.941	160	149	36,38,19	11,9,4	22,15,17	1,2,1
A3SS1627	ENSG00000184445.11_3	KNTC1	chr12	+	123098172	123098308	123098250	123098308	123097658	123097777	-0.001	0.669107	1	1.0,0.955,0.967	0.992,0.957,0.975	227	149	121,98,136	0,3,3	357,271,356	2,8,6
A3SS1628	ENSG00000136560.13_3	TANK	chr2	+	162059994	162060106	162059997	162060106	162036124	162036272	-0.018	0.214795	0.77564	0.027,0.011,0.024	0.014,0.077,0.025	152	149	9,3,5	312,256,202	2,9,4	137,106,155
A3SS1629	ENSG00000090554.12_3	FLT3LG	chr19	+	49978930	49979058	49978947	49979058	49977859	49977929	-0.106	0.0190782	0.152765	0.032,0.079,0.091	0.183,0.241,0.096	166	149	1,2,2	27,21,18	4,6,2	16,17,17
A3SS1630	ENSG00000090554.12_3	FLT3LG	chr19	+	49979373	49979455	49979401	49979455	49978947	49979058	-0.053	1	1	0.0,0.0,0.0	0.0,0.158,0.0	177	149	0,0,0	16,10,10	0,2,0	13,9,13
A3SS1631	ENSG00000090554.12_3	FLT3LG	chr19	+	49982165	49982304	49982219	49982304	49979679	49979823	-0.091	0.714919	1	0.88,0.688,0.595	0.936,0.905,0.595	203	149	10,3,2	1,1,1	20,13,4	1,1,2
A3SS1632	ENSG00000090554.12_3	FLT3LG	chr19	+	49989220	49989408	49989271	49989408	49979679	49979823	-0.843	1	1	0.271,0.199,0.0	NA,NA,1.0	200	149	2,1,0	4,3,1	0,0,4	0,0,0
A3SS1633	ENSG00000090554.12_3	FLT3LG	chr19	+	49989220	49989408	49989271	49989408	49983808	49983877	-0.193	0.120079	0.53497	0.058,0.373,0.0	0.157,0.427,0.427	200	149	1,4,0	12,5,9	2,2,3	8,2,3
A3SS1634	ENSG00000198000.11_3	NOL8	chr9	-	95062171	95063092	95062171	95062298	95063832	95064104	-0.023	0.000144255	0.00394371	0.017,0.012,0.045	0.048,0.042,0.054	943	149	15,7,32	138,94,107	56,38,45	176,136,124
A3SS1635	ENSG00000198000.11_3	NOL8	chr9	-	95082224	95082661	95082224	95082419	95083949	95084028	0.046	0.517993	1	0.132,1.0,1.0	0.792,1.0,0.203	391	149	2,5,7	5,0,0	10,8,2	1,0,3
A3SS1636	ENSG00000149532.15_4	CPSF7	chr11	-	61183576	61183991	61183576	61183634	61187420	61187566	-0.005	1	1	1.0,0.985,1.0	1.0,1.0,1.0	506	149	366,227,310	0,1,0	440,497,545	0,0,0
A3SS1637	ENSG00000149532.15_4	CPSF7	chr11	-	61187941	61188045	61187941	61188002	61188861	61189080	0	1	1	1.0,1.0,0.985	0.993,1.0,0.993	192	149	102,64,84	0,0,1	177,183,190	1,0,1
A3SS1638	ENSG00000149532.15_4	CPSF7	chr11	-	61188525	61188602	61188525	61188599	61188861	61189080	-0.046	0.915448	1	0.62,0.595,0.855	0.632,0.831,0.746	152	149	5,3,6	3,2,1	7,5,3	4,1,1
A3SS1639	ENSG00000149532.15_4	CPSF7	chr11	-	61183137	61183991	61183137	61183256	61196653	61196762	-0.011	1	1	0.967,1.0,1.0	1.0,1.0,1.0	884	149	174,114,149	1,0,0	219,240,246	0,0,0
A3SS1641	ENSG00000119685.19_3	TTLL5	chr14	+	76259255	76259443	76259258	76259443	76249489	76249873	-0.202	0.00358886	0.0452246	0.229,0.257,0.155	0.517,0.374,0.357	152	149	10,6,3	33,17,16	24,14,13	22,23,23
A3SS1643	ENSG00000163701.18_3	IL17RE	chr3	+	9956085	9956283	9956231	9956283	9955639	9955708	0.013	1	1	0.202,1.0,0.336	0.0,NA,1.0	295	149	1,2,3	2,0,3	0,0,1	1,0,0
A3SS1644	ENSG00000163701.18_3	IL17RE	chr3	+	9956158	9956283	9956231	9956283	9955639	9955708	0.394	1	1	0.0,1.0,0.183	0.0,NA,NA	222	149	0,2,1	2,0,3	0,0,0	1,0,0
A3SS1645	ENSG00000172183.14_2	ISG20	chr15	+	89193465	89195541	89195340	89195541	89182573	89182825	0.028	1.47573e-05	0.000574685	0.054,0.045,0.05	0.02,0.014,0.03	2024	149	61,33,47	79,52,66	16,9,23	58,48,55
A3SS1646	ENSG00000172183.14_2	ISG20	chr15	+	89193465	89195541	89195400	89195541	89182573	89182825	-0.092	0.607629	1	0.479,0.227,0.425	0.383,0.334,0.689	2084	149	77,41,62	6,10,6	26,21,31	3,3,1
A3SS1647	ENSG00000172183.14_2	ISG20	chr15	+	89195340	89195541	89195400	89195541	89182573	89182825	-0.073	0.00910423	0.0897654	0.919,0.811,0.906	0.942,0.934,0.978	209	149	95,60,81	6,10,6	68,60,63	3,3,1
A3SS1648	ENSG00000072778.19_2	ACADVL	chr17	+	7123782	7123995	7123922	7123995	7123440	7123516	-0.032	0.0611859	0.343924	0.899,0.888,0.914	0.92,0.937,0.941	289	149	310,278,247	18,18,12	289,372,312	13,13,10
A3SS1649	ENSG00000072778.19_2	ACADVL	chr17	+	7124837	7125001	7124856	7125001	7124242	7124377	-0.004	1	1	0.0,0.002,0.0	0.002,0.009,0.002	168	149	0,1,0	471,414,345	1,4,1	382,411,431
A3SS1650	ENSG00000072778.19_2	ACADVL	chr17	+	7125985	7126556	7126451	7126556	7125495	7125621	0.001	1	1	1.0,1.0,1.0	1.0,1.0,0.996	615	149	1057,800,803	0,0,0	927,1126,1094	0,0,1
A3SS1651	ENSG00000072778.19_2	ACADVL	chr17	+	7127798	7127871	7127802	7127871	7127639	7127712	-0.004	0.591626	1	0.967,0.967,0.966	0.973,0.976,0.962	153	149	670,541,518	22,18,18	630,807,744	17,19,29
A3SS1652	ENSG00000072778.19_2	ACADVL	chr17	+	7128033	7128203	7128127	7128203	7127798	7127871	-0.097	1	1	1.0,1.0,0.71	1.0,1.0,1.0	243	149	17,11,8	0,0,2	10,16,18	0,0,0
A3SS1655	ENSG00000276170.4_3	AC244153.1	chr17	-	36607549	36607769	36607549	36607637	36607869	36608071	-0.027	0.608043	1	0.557,0.375,0.163	0.353,0.449,0.374	281	149	19,17,7	8,15,19	38,40,35	37,26,31
A3SS1656	ENSG00000149091.15_3	DGKZ	chr11	+	46389201	46389297	46389204	46389297	46388840	46388949	-0.011	0.778712	1	0.991,0.972,0.97	1.0,1.0,0.966	152	149	118,105,100	1,3,3	68,61,58	0,0,2
A3SS1657	ENSG00000149091.15_3	DGKZ	chr11	+	46389551	46389629	46389554	46389629	46389201	46389297	0.025	0.828338	1	0.766,0.761,0.774	0.662,0.679,0.884	152	149	87,78,77	26,24,22	28,28,39	14,13,5
A3SS1658	ENSG00000149091.15_3	DGKZ	chr11	+	46390913	46391100	46391043	46391100	46389554	46389629	-0.001	0.554604	1	0.005,0.0,0.042	0.0,0.03,0.021	279	149	1,0,6	110,84,74	0,3,2	33,52,51
A3SS1659	ENSG00000149091.15_3	DGKZ	chr11	+	46400443	46400661	46400540	46400661	46400006	46400050	0.045	0.0601467	0.339848	0.095,0.108,0.157	0.04,0.123,0.063	246	149	20,16,23	116,80,75	3,12,6	44,52,54
A3SS1660	ENSG00000149091.15_3	DGKZ	chr11	+	46401003	46401118	46401018	46401118	46400752	46400786	0.005	0.301109	0.947729	0.025,0.034,0.008	0.0,0.025,0.027	164	149	4,4,1	140,102,106	0,2,2	70,72,65
A3SS1661	ENSG00000120784.15_3	ZFP30	chr19	-	38134165	38134264	38134165	38134261	38135510	38135637	-0.051	0.610868	1	0.364,0.416,0.269	0.232,0.524,0.445	152	149	7,8,6	12,11,16	4,9,9	13,8,11
A3SS1662	ENSG00000141959.16_1	PFKL	chr21	+	45733795	45736222	45736126	45736222	45733520	45733565	-0.369	0.00189831	0.0282296	0.325,1.0,0.429	1.0,0.86,1.0	2480	149	16,17,25	2,0,2	83,102,57	0,1,0
A3SS1663	ENSG00000141959.16_1	PFKL	chr21	+	45745614	45745943	45745843	45745943	45745035	45745147	-0.009	0.149905	0.618002	0.0,0.0,0.051	0.024,0.016,0.037	378	149	0,0,3	23,22,22	4,3,5	65,71,52
A3SS1664	ENSG00000149743.13_2	TRPT1	chr11	-	63991571	63991682	63991571	63991634	63991756	63991813	0.042	0.510582	1	1.0,0.77,0.941	0.862,0.955,0.769	197	149	27,31,21	0,7,1	33,28,22	4,1,5
A3SS1665	ENSG00000149743.13_2	TRPT1	chr11	-	63992272	63993052	63992272	63992442	63993257	63993341	-0.056	1	1	0.831,1.0,1.0	1.0,1.0,1.0	759	149	25,18,10	1,0,0	11,18,9	0,0,0
A3SS1666	ENSG00000048991.16_2	R3HDM1	chr2	+	136409299	136409602	136409302	136409602	136402948	136403097	-0.075	0.444725	1	0.415,0.595,0.729	0.672,0.738,0.554	152	149	13,9,22	18,6,8	23,23,19	11,8,15
A3SS1667	ENSG00000215068.7_3	AC025171.2	chr5	+	43044494	43045370	43044800	43045370	43042234	43043669	-0.048	0.661753	1	0.247,0.29,0.219	0.214,0.314,0.371	455	149	3,5,6	3,4,7	10,7,9	12,5,5
A3SS1668	ENSG00000008128.22_3	CDK11A	chr1	-	1635477	1635783	1635477	1635585	1635988	1636094	-0.093	1	1	1.0,0.72,1.0	1.0,1.0,1.0	347	149	4,12,9	0,2,0	14,5,6	0,0,0
A3SS1669	ENSG00000008128.22_3	CDK11A	chr1	-	1643702	1643866	1643702	1643839	1647784	1647917	0.045	1.07922e-05	0.000440401	0.074,0.043,0.082	0.017,0.016,0.03	176	149	20,8,19	213,149,181	4,4,6	192,204,164
A3SS1670	ENSG00000113013.12_3	HSPA9	chr5	-	137892140	137892281	137892140	137892262	137893090	137893185	0.007	0.944191	1	0.922,0.852,1.0	0.871,0.915,0.966	168	149	67,65,64	5,10,0	61,73,64	8,6,2
A3SS1671	ENSG00000227372.11_3	TP73-AS1	chr1	-	3659367	3659521	3659367	3659475	3659624	3659754	-0.067	0.67977	1	0.433,0.475,0.407	0.433,0.808,0.276	195	149	13,13,9	13,11,10	8,11,5	8,2,10
A3SS1672	ENSG00000227372.11_3	TP73-AS1	chr1	-	3659367	3659524	3659367	3659475	3659624	3659754	-0.095	0.615732	1	0.448,0.429,0.311	0.32,0.725,0.429	198	149	14,11,6	13,11,10	5,7,10	8,2,10
A3SS1673	ENSG00000227372.11_3	TP73-AS1	chr1	-	3659367	3659524	3659367	3659521	3659624	3659754	-0.028	0.894893	1	0.534,0.433,0.38	0.329,0.329,0.774	152	149	7,7,5	6,9,8	3,4,7	6,8,2
A3SS1675	ENSG00000115875.18_2	SRSF7	chr2	-	38976039	38976488	38976039	38976315	38976670	38976847	-0.039	0.00037948	0.0083501	0.937,0.975,0.944	0.993,0.992,0.987	322	149	225,168,254	7,2,7	291,281,322	1,1,2
A3SS1681	ENSG00000258479.5_2	LINC00640	chr14	+	51816912	51817090	51817010	51817090	51816386	51816461	-1	1	1	0.0,NA,NA	1.0,NA,1.0	247	149	0,0,0	2,0,0	2,0,2	0,0,0
A3SS1702	ENSG00000012124.16_3	CD22	chr19	+	35832245	35832509	35832428	35832509	35831783	35832041	0.123	1	1	1.0,1.0,NA	0.759,0.871,1.0	332	149	1,3,0	0,0,0	7,15,4	1,1,0
A3SS1706	ENSG00000178826.10_2	TMEM139	chr7	+	142982437	142982538	142982440	142982538	142982043	142982067	-0.101	0.354382	1	0.303,0.246,0.246	0.528,0.308,0.263	152	149	4,1,1	9,3,3	8,5,4	7,11,11
A3SS1707	ENSG00000132004.12_2	FBXW9	chr19	-	12800775	12801014	12800775	12800924	12801979	12802071	0.261	0.00472971	0.0560217	0.09,0.483,0.384	0.106,0.068,0.0	239	149	3,3,6	19,2,6	4,2,0	21,17,23
A3SS1708	ENSG00000204261.8_3	PSMB8-AS1	chr6	+	32812421	32812647	32812586	32812647	32811909	32812051	-0.119	0.679192	1	0.0,1.0,1.0	1.0,0.703,0.655	314	149	0,2,3	1,0,0	9,10,4	0,2,1
A3SS1709	ENSG00000120533.12_2	ENY2	chr8	+	110352672	110352792	110352717	110352792	110351548	110351619	-0.001	1	1	0.008,0.007,0.001	0.009,0.007,0.004	194	149	9,6,1	836,635,592	8,5,3	643,545,568
A3SS1710	ENSG00000120533.12_2	ENY2	chr8	+	110352672	110352792	110352719	110352792	110351548	110351619	-0.033	0.272493	0.895027	0.089,0.06,0.012	0.107,0.081,0.071	196	149	9,6,1	70,71,61	8,5,3	51,43,30
A3SS1711	ENSG00000120533.12_2	ENY2	chr8	+	110352717	110352792	110352719	110352792	110351548	110351619	-0.025	0.0175805	0.145287	0.922,0.898,0.905	0.926,0.926,0.949	151	149	836,635,592	70,71,61	643,545,568	51,43,30
A3SS1713	ENSG00000084072.16_3	PPIE	chr1	+	40205760	40205935	40205836	40205935	40204572	40204603	-0.005	1	1	0.0,0.0,0.0	0.008,0.007,0.0	225	149	0,0,0	143,85,74	1,1,0	87,88,114
A3SS1714	ENSG00000084072.16_3	PPIE	chr1	+	40207566	40208969	40208887	40208969	40207037	40207081	-0.015	1	1	1.0,1.0,0.955	1.0,1.0,1.0	1470	149	231,176,210	0,0,1	259,224,242	0,0,0
A3SS1715	ENSG00000084072.16_3	PPIE	chr1	+	40211046	40211170	40211085	40211170	40209495	40209596	0.025	0.0152185	0.129321	0.966,0.971,0.991	0.958,0.945,0.951	188	149	362,333,270	10,8,2	286,282,293	10,13,12
A3SS1716	ENSG00000177225.16_3	GATD1	chr11	-	770992	771212	770992	771104	771332	771426	0.121	0.472661	1	0.317,0.0,0.448	0.097,0.138,0.167	257	149	4,0,7	5,10,5	8,13,10	43,47,29
A3SS1717	ENSG00000177225.16_3	GATD1	chr11	-	771332	771467	771332	771426	772426	772521	0.152	0.00113953	0.0196442	0.272,0.174,0.207	0.065,0.133,0.0	190	149	10,7,3	21,26,9	5,11,0	56,56,50
A3SS1718	ENSG00000154518.9_2	ATP5G3	chr2	-	176046082	176046211	176046082	176046194	176046383	176046438	0.012	0.0110461	0.102209	0.02,0.025,0.017	0.0,0.015,0.011	166	149	10,14,7	432,488,356	0,4,4	317,239,318
A3SS1723	ENSG00000117143.13_4	UAP1	chr1	+	162562521	162562572	162562524	162562572	162560112	162560301	-0.022	0.41693	1	0.745,0.752,0.818	0.809,0.769,0.804	152	149	116,108,92	39,35,20	177,204,230	41,60,55
A3SS1725	ENSG00000123384.13_3	LRP1	chr12	+	57542763	57543842	57543462	57543842	57539009	57539273	0.414	1	1	0.034,0.209,1.0	NA,0.0,NA	848	149	1,3,2	5,2,0	0,0,0	0,1,0
A3SS1726	ENSG00000139641.12_3	ESYT1	chr12	+	56527863	56527965	56527893	56527965	56527564	56527657	0.016	0.345897	1	0.139,0.155,0.097	0.119,0.128,0.096	179	149	41,35,19	212,159,148	36,31,30	221,176,235
A3SS1728	ENSG00000105486.13_3	LIG1	chr19	-	48640778	48641016	48640778	48640945	48643227	48643400	0.156	0.0587722	0.333474	0.127,0.184,0.441	0.101,0.119,0.063	220	149	3,2,7	14,6,6	5,8,6	30,40,60
A3SS1729	ENSG00000105486.13_3	LIG1	chr19	-	48654488	48654596	48654488	48654593	48657128	48657224	-0.133	0.0401535	0.256205	0.611,0.729,0.495	0.767,0.752,0.715	152	149	16,11,16	10,4,16	148,102,87	44,33,34
A3SS1732	ENSG00000128159.11_4	TUBGCP6	chr22	-	50656617	50656831	50656617	50656799	50656916	50657049	0.318	0.00756396	0.0787379	1.0,1.0,1.0	0.712,0.622,0.712	181	149	4,4,5	0,0,0	3,4,3	1,2,1
A3SS1733	ENSG00000128159.11_4	TUBGCP6	chr22	-	50658385	50660303	50658385	50658444	50660456	50660531	-0.004	0.0528037	0.308011	0.601,1.0,1.0	1.0,1.0,0.614	2008	149	61,35,67	3,0,0	79,62,107	0,0,5
A3SS1734	ENSG00000128159.11_4	TUBGCP6	chr22	-	50660882	50661021	50660882	50661017	50662569	50662685	-0.023	1	1	0.932,1.0,1.0	1.0,1.0,1.0	153	149	14,7,12	1,0,0	17,17,15	0,0,0
A3SS1735	ENSG00000000457.13_2	SCYL3	chr1	-	169838068	169838269	169838068	169838180	169839395	169839498	-0.072	1	1	0.0,0.0,0.0	0.135,0.082,0.0	238	149	0,0,0	5,5,5	1,1,0	4,7,8
A3SS1737	ENSG00000129515.18_3	SNX6	chr14	-	35073340	35073474	35073340	35073380	35074801	35074923	0.207	0.628643	1	1.0,1.0,1.0	1.0,0.38,1.0	243	149	7,3,5	0,0,0	6,2,3	0,2,0
A3SS1738	ENSG00000129515.18_3	SNX6	chr14	-	35099112	35099160	35099112	35099156	35099316	35099364	-0.014	1	1	0.984,0.989,0.986	1.0,1.0,1.0	153	149	130,92,71	2,1,1	68,78,131	0,0,0
A3SS1739	ENSG00000129351.17_2	ILF3	chr19	+	10793800	10793938	10793812	10793938	10793212	10793380	-0.041	0.122225	0.542352	0.436,0.442,0.47	0.501,0.476,0.495	161	149	221,170,186	265,199,194	324,273,343	299,278,324
A3SS1740	ENSG00000129351.17_2	ILF3	chr19	+	10795091	10796441	10795534	10796441	10794592	10794646	0.005	0.930289	1	0.989,0.993,0.987	0.979,0.986,0.988	592	149	743,550,586	2,1,2	935,837,958	5,3,3
A3SS1741	ENSG00000188243.12_2	COMMD6	chr13	-	76104446	76104544	76104446	76104541	76111799	76111811	-0.082	0.103245	0.484425	0.349,0.265,0.204	0.34,0.309,0.416	152	149	40,18,12	73,49,46	43,26,61	82,57,84
A3SS1742	ENSG00000188186.10_2	LAMTOR4	chr7	+	99751472	99751826	99751489	99751826	99751022	99751140	-0.016	0.0303249	0.209373	0.018,0.025,0.025	0.049,0.034,0.032	166	149	7,8,8	345,285,285	16,14,12	279,352,328
A3SS1743	ENSG00000096093.15_3	EFHC1	chr6	+	52288743	52288965	52288750	52288965	52285170	52285271	0.005	1	1	1.0,1.0,1.0	1.0,0.985,1.0	156	149	74,51,51	0,0,0	42,67,84	0,1,0
A3SS1744	ENSG00000096093.15_3	EFHC1	chr6	+	52318859	52319085	52318892	52319085	52317485	52317635	-0.023	0.353295	1	0.079,0.034,0.072	0.1,0.059,0.095	182	149	4,1,2	38,23,21	5,2,5	37,26,39
A3SS1745	ENSG00000096093.15_3	EFHC1	chr6	+	52343834	52344048	52343889	52344048	52334130	52334271	0.004	0.644106	1	0.986,1.0,0.968	0.977,0.973,0.991	204	149	99,60,83	1,0,2	116,148,151	2,3,1
A3SS1746	ENSG00000145687.16_3	SSBP2	chr5	-	80762792	80762884	80762792	80762860	80769518	80769589	-0.017	1	1	0.067,0.0,0.0	0.0,0.0,0.117	173	149	1,0,0	12,3,15	0,0,2	20,8,13
A3SS1747	ENSG00000103067.13_3	ESRP2	chr16	-	68266479	68266620	68266479	68266590	68266663	68266718	-0.014	1	1	0.0,0.0,0.0	0.0,0.015,0.028	179	149	0,0,0	45,33,24	0,1,2	52,55,57
A3SS1748	ENSG00000104756.15_2	KCTD9	chr8	-	25297121	25297308	25297121	25297180	25298092	25298189	-0.019	0.0342987	0.229092	0.029,0.031,0.03	0.044,0.056,0.048	277	149	15,12,13	269,204,223	15,15,16	175,135,170
A3SS1749	ENSG00000164329.13_2	PAPD4	chr5	+	78938654	78938733	78938666	78938733	78936927	78937019	-0.036	0.554004	1	0.536,0.546,0.42	0.563,0.453,0.594	161	149	35,39,25	28,30,32	57,34,49	41,38,31
A3SS1750	ENSG00000006025.11_3	OSBPL7	chr17	-	45886229	45886356	45886229	45886312	45886441	45886481	-0.013	1	1	0.903,1.0,0.929	0.963,1.0,0.909	193	149	12,6,17	1,0,1	34,20,26	1,0,2
A3SS1751	ENSG00000006025.11_3	OSBPL7	chr17	-	45891886	45892073	45891886	45891980	45892580	45892718	0.221	1	1	0.0,NA,0.711	0.144,0.26,0.0	242	149	0,0,4	2,0,1	3,4,0	11,7,4
A3SS1752	ENSG00000006025.11_3	OSBPL7	chr17	-	45893472	45893848	45893472	45893568	45893928	45894061	-0.426	1	1	0.148,1.0,NA	1.0,1.0,1.0	429	149	1,4,0	2,0,0	6,8,8	0,0,0
A3SS1754	ENSG00000135596.17_4	MICAL1	chr6	-	109769934	109770082	109769934	109770073	109770602	109770684	0.05	1	1	1.0,1.0,1.0	1.0,0.85,1.0	158	149	15,13,20	0,0,0	9,6,9	0,1,0
A3SS1755	ENSG00000131238.17_3	PPT1	chr1	-	40555081	40555254	40555081	40555184	40557000	40557071	0.001	1	1	0.0,0.002,0.0	0.0,0.0,0.0	219	149	0,1,0	514,390,394	0,0,0	201,230,267
A3SS1756	ENSG00000131238.17_3	PPT1	chr1	-	40558069	40558176	40558069	40558172	40562786	40562924	0.005	1	1	0.886,1.0,1.0	0.872,1.0,1.0	153	149	8,6,9	1,0,0	7,8,11	1,0,0
A3SS1757	ENSG00000131238.17_3	PPT1	chr1	-	40558069	40558179	40558069	40558172	40562786	40562924	0	1	1	0.997,1.0,1.0	0.996,1.0,1.0	156	149	391,336,312	1,0,0	250,196,218	1,0,0
A3SS1758	ENSG00000131238.17_3	PPT1	chr1	-	40558069	40558179	40558069	40558176	40562786	40562924	0.005	1	1	1.0,1.0,1.0	1.0,1.0,0.986	152	149	383,330,303	0,0,0	243,188,210	0,0,3
A3SS1759	ENSG00000143774.16_3	GUK1	chr1	+	228333171	228333325	228333211	228333325	228327928	228328064	-0.001	1	1	0.002,0.0,0.0	0.0,0.0,0.006	189	149	1,0,0	368,359,287	0,0,2	277,241,247
A3SS1760	ENSG00000143774.16_3	GUK1	chr1	+	228333713	228333768	228333726	228333768	228333211	228333325	0.012	0.0184797	0.149865	0.015,0.014,0.038	0.017,0.01,0.005	162	149	9,8,18	542,527,423	10,5,3	548,440,503
A3SS1761	ENSG00000143774.16_3	GUK1	chr1	+	228334542	228334639	228334561	228334639	228333713	228333768	-0.031	0.0085144	0.0850341	0.904,0.894,0.891	0.923,0.932,0.928	168	149	625,621,481	59,65,52	564,512,580	42,33,40
A3SS1762	ENSG00000143774.16_3	GUK1	chr1	+	228335315	228335400	228335321	228335400	228335106	228335245	-0.001	1	1	0.996,0.994,0.993	0.998,0.996,0.991	155	149	567,494,424	2,3,3	539,504,483	1,2,4
A3SS1770	ENSG00000167377.17_3	ZNF23	chr16	-	71487944	71488121	71487944	71488071	71489974	71490024	-0.204	0.282357	0.909635	0.2,0.428,0.789	1.0,0.428,0.6	199	149	1,3,5	3,3,1	6,4,4	0,4,2
A3SS1771	ENSG00000148200.16_3	NR6A1	chr9	-	127300370	127300598	127300370	127300595	127302311	127302466	-0.085	1	1	0.746,1.0,1.0	1.0,NA,NA	152	149	9,4,16	3,0,0	2,0,0	0,0,0
A3SS1775	ENSG00000161204.11_2	ABCF3	chr3	+	183905151	183905231	183905184	183905231	183904583	183904663	0.01	0.394315	1	0.024,0.0,0.055	0.036,0.0,0.012	182	149	3,0,4	100,62,56	4,0,1	88,86,68
A3SS1777	ENSG00000113916.17_3	BCL6	chr3	-	187449496	187449718	187449496	187449656	187451320	187451491	0.04	0.324734	0.987541	0.953,0.966,0.924	1.0,0.902,0.821	211	149	86,81,69	3,2,4	10,13,13	0,1,2
A3SS1778	ENSG00000143436.10_4	MRPL9	chr1	-	151734437	151734501	151734437	151734486	151734580	151734631	0.084	1	1	0.115,0.0,0.476	0.0,0.185,0.154	164	149	1,0,1	7,1,1	0,1,1	5,4,5
A3SS1779	ENSG00000143379.12_2	SETDB1	chr1	+	150902442	150902594	150902473	150902594	150900179	150900450	-0.001	1	1	1.0,0.966,1.0	0.985,0.992,0.993	180	149	116,104,119	0,3,0	161,144,165	2,1,1
A3SS1780	ENSG00000143379.12_2	SETDB1	chr1	+	150921842	150922001	150921845	150922001	150921597	150921754	-0.012	0.990126	1	0.779,0.616,0.779	0.64,0.864,0.706	152	149	18,18,18	5,11,5	29,26,22	16,4,9
A3SS1807	ENSG00000113810.15_2	SMC4	chr3	+	160119702	160119881	160119777	160119881	160118609	160118753	-0.002	1	1	0.997,0.98,0.988	0.996,0.981,0.993	224	149	483,290,386	1,4,3	377,385,434	1,5,2
A3SS1808	ENSG00000113810.15_2	SMC4	chr3	+	160122115	160122292	160122165	160122292	160120463	160120655	-0.006	0.42841	1	0.981,0.968,0.969	0.988,0.976,0.971	199	149	821,492,621	12,12,15	534,480,590	5,9,13
A3SS1816	ENSG00000118200.14_3	CAMSAP2	chr1	+	200816337	200816420	200816385	200816420	200813909	200813997	0.026	0.437581	1	0.906,0.768,0.935	0.727,0.86,0.945	197	149	102,35,57	8,8,3	60,65,113	17,8,5
A3SS1818	ENSG00000205702.10_2	CYP2D7	chr22	-	42537271	42537685	42537271	42537406	42537877	42538054	-0.086	0.187132	0.712463	1.0,1.0,0.0	1.0,0.258,1.0	428	149	2,1,0	0,0,2	3,1,2	0,1,0
A3SS1820	ENSG00000178950.16_2	GAK	chr4	-	843679	844197	843679	843856	844723	844872	0.006	1	1	0.013,0.006,0.011	0.011,0.0,0.0	490	149	4,1,3	90,49,85	3,0,0	79,84,99
A3SS1821	ENSG00000137814.10_2	HAUS2	chr15	+	42853467	42853600	42853472	42853600	42852979	42853068	0.029	0.162633	0.651616	0.962,1.0,0.977	0.97,1.0,0.883	154	149	53,44,43	2,0,1	33,50,39	1,0,5
A3SS1823	ENSG00000198176.12_2	TFDP1	chr13	+	114291934	114292211	114292132	114292211	114290848	114291015	0	0.861288	1	0.017,0.011,0.03	0.012,0.02,0.027	347	149	13,8,18	317,306,246	10,14,22	351,302,342
A3SS1825	ENSG00000111142.13_3	METAP2	chr12	+	95879654	95879757	95879723	95879757	95876990	95877056	-0.003	1	1	0.992,0.988,0.986	0.991,0.992,0.993	218	149	910,745,735	5,6,7	1165,1030,1032	7,6,5
A3SS1828	ENSG00000121064.12_3	SCPEP1	chr17	+	55075734	55075859	55075745	55075859	55074322	55074416	-0.01	1	1	0.0,0.0,0.0	0.0,0.03,0.0	160	149	0,0,0	65,41,50	0,1,0	34,30,25
A3SS1829	ENSG00000023191.16_2	RNH1	chr11	-	499828	499999	499828	499923	500483	500654	-0.009	1	1	0.984,0.989,1.0	1.0,1.0,1.0	225	149	187,132,142	2,1,0	176,141,150	0,0,0
A3SS1830	ENSG00000023191.16_2	RNH1	chr11	-	500483	500738	500483	500654	502061	502249	0.022	0.00322094	0.041504	0.026,0.027,0.03	0.005,0.0,0.011	233	149	7,8,7	170,181,147	1,0,3	125,125,172
A3SS1831	ENSG00000023191.16_2	RNH1	chr11	-	502061	502249	502061	502181	504823	504996	0.149	0.0122737	0.110399	0.595,0.73,0.677	0.607,0.452,0.496	217	149	45,55,52	21,14,17	54,42,53	24,35,37
A3SS1834	ENSG00000182326.14_3	C1S	chr12	+	7169055	7169221	7169142	7169221	7167979	7168181	0.114	0.210144	0.761386	0.578,0.85,1.0	0.698,0.617,0.771	236	149	13,9,14	6,1,0	22,23,32	6,9,6
A3SS1837	ENSG00000070018.8_2	LRP6	chr12	-	12284754	12284991	12284754	12284856	12288108	12288234	0.008	1	1	1.0,1.0,0.956	1.0,1.0,0.932	284	149	55,39,41	0,0,1	19,14,26	0,0,1
A3SS1839	ENSG00000102032.12_3	RENBP	chrX	-	153208306	153208531	153208306	153208486	153208997	153209170	-0.069	1	1	0.793,1.0,1.0	1.0,1.0,1.0	194	149	5,10,4	1,0,0	10,2,1	0,0,0
A3SS1840	ENSG00000163157.14_3	TMOD4	chr1	-	151143395	151143539	151143395	151143535	151143908	151144016	-0.507	1	1	0.493,NA,NA	1.0,NA,1.0	153	149	2,0,0	2,0,0	3,0,1	0,0,0
A3SS1841	ENSG00000163157.14_3	TMOD4	chr1	-	151146866	151147023	151146866	151147007	151147228	151147393	-0.262	1	1	NA,1.0,0.475	1.0,1.0,NA	165	149	0,2,1	0,0,1	2,4,0	0,0,0
A3SS1844	ENSG00000125846.15_2	ZNF133	chr20	+	18295712	18297638	18295715	18297638	18286941	18287037	-0.468	1	1	0.0,0.495,NA	0.696,0.595,0.855	152	149	0,1,0	1,1,0	7,6,6	3,4,1
A3SS1845	ENSG00000157637.12_3	SLC38A10	chr17	-	79220684	79220861	79220684	79220858	79225292	79225412	0.016	0.201487	0.742442	0.924,1.0,1.0	0.975,0.934,0.966	152	149	37,22,17	3,0,0	80,58,58	2,4,2
A3SS1846	ENSG00000197635.9_3	DPP4	chr2	-	162903912	162904011	162903912	162904008	162929908	162929996	1	1	1	1.0,1.0,1.0	NA,0.0,0.0	152	149	4,1,2	0,0,0	0,0,0	0,1,1
A3SS1848	ENSG00000118495.18_2	PLAGL1	chr6	-	144281605	144281693	144281605	144281679	144285923	144285955	-0.151	1	1	NA,NA,0.0	0.268,0.0,0.186	163	149	0,0,0	0,0,1	2,0,1	5,2,4
A3SS1849	ENSG00000118495.18_2	PLAGL1	chr6	-	144281605	144281717	144281605	144281679	144285923	144285955	0.5	1	1	1.0,NA,0.0	0.0,0.0,0.0	187	149	1,0,0	0,0,1	0,0,0	5,2,4
A3SS1850	ENSG00000118495.18_2	PLAGL1	chr6	-	144281605	144281717	144281605	144281693	144285923	144285955	1	1	1	1.0,NA,NA	0.0,NA,0.0	173	149	1,0,0	0,0,0	0,0,0	2,0,1
A3SS1851	ENSG00000118495.18_2	PLAGL1	chr6	-	144285923	144287367	144285923	144285955	144290043	144290115	-0.196	1	1	0.0,NA,NA	0.364,0.223,0.0	1561	149	0,0,0	1,0,0	6,3,0	1,1,2
A3SS1852	ENSG00000118495.18_2	PLAGL1	chr6	-	144287294	144287349	144287294	144287335	144290043	144290115	-0.353	1	1	0.314,NA,NA	0.0,1.0,1.0	163	149	1,0,0	2,0,0	0,2,1	1,0,0
A3SS1854	ENSG00000118495.18_2	PLAGL1	chr6	-	144287294	144287422	144287294	144287335	144290043	144290115	-0.454	1	1	0.24,NA,NA	0.387,1.0,NA	236	149	1,0,0	2,0,0	1,2,0	1,0,0
A3SS1856	ENSG00000118495.18_2	PLAGL1	chr6	-	144287294	144287422	144287294	144287349	144290043	144290115	-0.065	1	1	0.402,NA,NA	1.0,0.402,0.0	222	149	1,0,0	1,0,0	1,2,0	0,2,1
A3SS1858	ENSG00000115380.19_3	EFEMP1	chr2	-	56144799	56145219	56144799	56145186	56145353	56145402	-0.002	1	1	0.0,0.0,0.0	0.001,0.002,0.003	182	149	0,0,0	694,569,504	1,2,3	910,761,860
A3SS1859	ENSG00000115380.19_3	EFEMP1	chr2	-	56149494	56149826	56149494	56149582	56150033	56150074	-0.016	0.0276358	0.196762	0.008,0.019,0.041	0.044,0.044,0.028	393	149	2,3,6	93,58,53	12,12,8	99,100,106
A3SS1860	ENSG00000115380.19_3	EFEMP1	chr2	-	56149705	56149882	56149705	56149826	56150033	56150074	-0.128	0.537182	1	0.421,0.421,0.592	0.326,0.492,1.0	205	149	1,2,2	1,2,1	2,4,4	3,3,0
A3SS1861	ENSG00000154874.15_3	CCDC144B	chr17	-	18511209	18511283	18511209	18511280	18513356	18513605	-0.333	1	1	1.0,1.0,0.0	1.0,1.0,NA	152	149	4,1,0	0,0,1	1,2,0	0,0,0
A3SS1865	ENSG00000058600.15_4	POLR3E	chr16	+	22320245	22320361	22320295	22320361	22319468	22319546	0.007	0.648685	1	1.0,0.986,0.99	0.971,0.985,1.0	199	149	120,92,134	0,1,1	220,175,183	5,2,0
A3SS1867	ENSG00000058600.15_4	POLR3E	chr16	+	22343380	22343506	22343443	22343506	22339830	22339908	0.002	1	1	1.0,1.0,1.0	0.993,1.0,1.0	212	149	153,119,96	0,0,0	208,188,170	1,0,0
A3SS1871	ENSG00000146414.15_3	SHPRH	chr6	-	146266516	146266792	146266516	146266773	146267368	146267477	0.033	1	1	0.0,0.0,0.1	0.0,0.0,0.0	168	149	0,0,2	28,20,16	0,0,0	51,27,26
A3SS1873	ENSG00000000460.16_4	C1orf112	chr1	+	169773215	169773381	169773252	169773381	169772309	169772450	0.118	0.0361402	0.238046	0.938,0.925,0.737	0.734,0.746,0.766	186	149	38,31,35	2,2,10	31,44,45	9,12,11
A3SS1874	ENSG00000116062.14_3	MSH6	chr2	+	48025749	48028294	48025753	48028294	48023032	48023202	-0.001	1	1	0.989,0.994,0.995	0.996,0.996,0.99	153	149	266,170,211	3,1,1	566,458,424	2,2,4
A3SS1878	ENSG00000268750.6_4	AC010522.1	chr19	+	58367471	58367601	58367474	58367601	58331861	58331917	-0.175	1	1	0.0,0.0,NA	0.197,0.329,0.0	152	149	0,0,0	1,2,0	1,1,0	4,2,2
A3SS1879	ENSG00000004766.15_2	VPS50	chr7	+	92883172	92883244	92883175	92883244	92881965	92882088	-0.04	0.243632	0.831325	0.981,0.942,0.931	1.0,0.973,1.0	152	149	54,33,41	1,2,3	47,37,39	0,1,0
A3SS1880	ENSG00000004766.15_2	VPS50	chr7	+	92979186	92979345	92979190	92979345	92978022	92978119	-0.04	0.183666	0.703478	0.956,0.902,0.929	0.946,0.979,0.981	153	149	45,19,27	2,2,2	36,47,53	2,1,1
A3SS1882	ENSG00000071994.10_3	PDCD2	chr6	-	170892592	170892835	170892592	170892711	170893386	170893780	-0.007	1	1	0.978,1.0,1.0	1.0,1.0,1.0	273	149	160,173,139	2,0,0	151,150,158	0,0,0
A3SS1885	ENSG00000172638.12_3	EFEMP2	chr11	-	65634315	65634550	65634315	65634405	65635331	65635527	-0.073	1	1	1.0,1.0,0.78	1.0,1.0,1.0	294	149	15,8,14	0,0,2	11,16,8	0,0,0
A3SS1891	ENSG00000008294.20_2	SPAG9	chr17	-	49067037	49067233	49067037	49067188	49067810	49068029	-0.001	0.802071	1	0.933,0.942,0.976	0.967,0.916,0.971	194	149	164,128,159	9,6,3	154,114,132	4,8,3
A3SS1893	ENSG00000166619.12_3	BLCAP	chr20	-	36149720	36149853	36149720	36149811	36156194	36156280	0.562	1	1	NA,NA,1.0	NA,NA,0.438	191	149	0,0,1	0,0,0	0,0,1	0,0,1
A3SS1894	ENSG00000221914.9_3	PPP2R2A	chr8	+	26216422	26216548	26216427	26216548	26211983	26212149	0.508	1	1	1.0,NA,NA	0.492,NA,NA	154	149	2,0,0	0,0,0	2,0,0	2,0,0
A3SS1896	ENSG00000188603.18_3	CLN3	chr16	-	28498776	28499983	28498776	28498862	28500610	28500707	-0.017	0.631003	1	1.0,0.895,0.871	1.0,0.817,1.0	1270	149	138,145,115	0,2,2	76,76,114	0,2,0
A3SS1897	ENSG00000188603.18_3	CLN3	chr16	-	28498776	28499983	28498776	28498862	28502802	28502881	-0.298	0.278946	0.905376	0.105,1.0,1.0	1.0,1.0,1.0	1270	149	2,4,4	2,0,0	2,2,1	0,0,0
A3SS1898	ENSG00000138182.14_2	KIF20B	chr10	+	91486049	91486278	91486169	91486278	91484776	91484915	0.063	9.12998e-08	7.26773e-06	0.123,0.081,0.111	0.048,0.041,0.036	269	149	49,13,38	193,82,169	26,16,15	284,205,220
A3SS1899	ENSG00000205133.11_3	TRIQK	chr8	-	93897547	93898963	93897547	93898895	93904216	93904302	0.05	0.302236	0.949509	0.856,0.828,0.888	0.812,0.747,0.863	217	149	52,28,23	6,4,2	44,43,46	7,10,5
A3SS1900	ENSG00000205133.11_3	TRIQK	chr8	-	93929156	93929238	93929156	93929235	93933730	93933888	0.18	1	1	1.0,NA,NA	1.0,0.662,0.797	152	149	2,0,0	0,0,0	1,2,4	0,1,1
A3SS1902	ENSG00000205133.11_3	TRIQK	chr8	-	93929156	93929238	93929156	93929235	93966633	93966792	0.031	0.761772	1	0.563,0.691,0.691	0.603,0.495,0.755	152	149	21,16,16	16,7,7	31,16,22	20,16,7
A3SS1903	ENSG00000177565.16_3	TBL1XR1	chr3	-	176744160	176744262	176744160	176744258	176750758	176750924	0.01	1	1	1.0,0.992,1.0	1.0,0.963,1.0	153	149	165,128,109	0,1,0	64,53,86	0,2,0
A3SS1905	ENSG00000138674.16_3	SEC31A	chr4	-	83774722	83774868	83774722	83774790	83776055	83776182	-0.002	1	1	1.0,0.994,1.0	1.0,1.0,1.0	227	149	368,242,238	0,1,0	347,319,296	0,0,0
A3SS1906	ENSG00000138674.16_3	SEC31A	chr4	-	83799882	83800081	83799882	83800071	83801951	83802075	0.032	0.0266553	0.193931	0.977,0.95,0.972	0.945,0.904,0.953	159	149	223,182,149	5,9,4	146,121,150	8,12,7
A3SS1907	ENSG00000138674.16_3	SEC31A	chr4	-	83803010	83803093	83803010	83803090	83812240	83812331	-0.094	0.0109748	0.102073	0.815,0.734,0.717	0.883,0.878,0.787	152	149	117,79,80	26,28,31	92,103,109	12,14,29
A3SS1908	ENSG00000140992.18_3	PDPK1	chr16	+	2631295	2631364	2631300	2631364	2627425	2627501	0.136	1	1	1.0,NA,1.0	0.592,1.0,1.0	154	149	1,0,4	0,0,0	3,4,2	2,0,0
A3SS1909	ENSG00000183597.15_2	TANGO2	chr22	+	20040882	20041074	20040959	20041074	20039987	20040107	0.119	0.338688	1	0.18,0.086,0.305	0.116,0.099,0.0	226	149	2,1,2	6,7,3	3,1,0	15,6,7
A3SS1910	ENSG00000025800.13_3	KPNA6	chr1	+	32626215	32626304	32626219	32626304	32625000	32625132	0.001	1	1	1.0,0.989,1.0	1.0,0.986,1.0	153	149	127,90,85	0,1,0	62,70,64	0,1,0
A3SS1911	ENSG00000265241.6_3	RBM8A	chr1	+	145508206	145508284	145508209	145508284	145508015	145508075	-0.035	0.00348952	0.044236	0.86,0.851,0.86	0.888,0.887,0.902	152	149	1032,922,881	165,158,141	1182,925,966	146,116,103
A3SS1915	ENSG00000173230.15_4	GOLGB1	chr3	-	121438492	121438615	121438492	121438600	121441108	121441225	-0.027	0.300316	0.946999	0.679,0.645,1.0	0.732,1.0,0.672	164	149	7,2,7	3,1,0	9,6,9	3,0,4
A3SS1916	ENSG00000136854.19_3	STXBP1	chr9	+	130416169	130417243	130417220	130417243	130415993	130416075	-0.489	5.33419e-09	6.01541e-07	0.367,0.465,0.702	1.0,1.0,1.0	1200	149	28,7,38	6,1,2	20,4,14	0,0,0
A3SS1919	ENSG00000106089.11_2	STX1A	chr7	-	73115059	73115261	73115059	73115170	73117174	73117312	-0.02	1	1	0.972,1.0,0.968	1.0,1.0,1.0	240	149	56,79,99	1,0,2	42,35,44	0,0,0
A3SS1920	ENSG00000065485.19_3	PDIA5	chr3	+	122864945	122865106	122864964	122865106	122864368	122864439	-0.019	0.413591	1	0.91,0.882,0.826	0.903,0.846,0.926	168	149	149,118,145	13,14,27	94,93,85	9,15,6
A3SS1921	ENSG00000105677.11_2	TMEM147	chr19	+	36037573	36038142	36038020	36038142	36037427	36037487	-0.014	0.563385	1	0.973,0.981,0.989	1.0,0.985,1.0	596	149	439,424,367	3,2,1	273,269,281	0,1,0
A3SS1922	ENSG00000166986.14_3	MARS	chr12	+	57883206	57883341	57883237	57883341	57883049	57883128	0.004	1	1	1.0,0.995,1.0	0.996,0.991,0.996	180	149	273,223,262	0,1,0	289,270,273	1,2,1
A3SS1923	ENSG00000166986.14_3	MARS	chr12	+	57906018	57906136	57906085	57906136	57905790	57905886	0.004	1	1	1.0,0.989,0.99	0.986,0.987,0.994	216	149	570,499,430	0,4,3	500,444,506	5,4,2
A3SS1924	ENSG00000166986.14_3	MARS	chr12	+	57910027	57910438	57910217	57910438	57909702	57909774	-0.002	1	1	1.0,1.0,0.995	1.0,1.0,1.0	339	149	502,446,413	0,0,1	625,535,571	0,0,0
A3SS1926	ENSG00000174485.15_3	DENND4A	chr15	-	65992881	65993013	65992881	65993010	65993388	65993530	-0.005	0.650092	1	0.109,0.746,0.37	0.495,0.746,0.0	152	149	1,3,3	8,1,5	2,3,0	2,1,1
A3SS1927	ENSG00000134313.15_3	KIDINS220	chr2	-	8952524	8952626	8952524	8952623	8953366	8953465	-0.229	0.0134821	0.117707	0.171,0.174,0.184	0.164,0.495,0.558	152	149	4,3,3	19,14,13	1,8,9	5,8,7
A3SS1928	ENSG00000176842.14_3	IRX5	chr16	+	54966988	54968397	54966991	54968397	54966409	54966815	-0.005	1	1	0.987,0.977,1.0	0.978,1.0,1.0	152	149	76,87,68	1,2,0	46,67,67	1,0,0
A3SS1929	ENSG00000124181.14_3	PLCG1	chr20	+	39791013	39791176	39791091	39791176	39788745	39788793	0.025	0.0998845	0.476551	0.039,0.0,0.104	0.0,0.02,0.049	227	149	4,0,9	65,55,51	0,2,5	63,64,64
A3SS1930	ENSG00000124181.14_3	PLCG1	chr20	+	39802763	39802951	39802766	39802951	39802562	39802651	-0.037	0.40635	1	0.71,0.746,0.613	0.648,0.746,0.785	152	149	70,54,55	28,18,34	45,51,67	24,17,18
A3SS1932	ENSG00000181991.15_2	MRPS11	chr15	+	89018260	89018470	89018340	89018470	89011138	89011255	0.026	0.79705	1	0.178,0.196,0.146	0.303,0.0,0.14	229	149	7,3,5	21,8,19	6,0,3	9,5,12
A3SS1933	ENSG00000181991.15_2	MRPS11	chr15	+	89018340	89018470	89018402	89018470	89015857	89015956	-0.006	0.966651	1	0.986,0.946,0.958	0.955,1.0,0.953	211	149	306,174,261	3,7,8	330,334,313	11,0,11
A3SS1935	ENSG00000127325.18_3	BEST3	chr12	-	70065207	70065359	70065207	70065346	70066664	70066745	0.551	1	1	1.0,1.0,0.479	NA,0.551,0.0	162	149	3,3,1	0,0,1	0,4,0	0,3,1
A3SS1936	ENSG00000125746.16_4	EML2	chr19	-	46144898	46145006	46144898	46145003	46145175	46145299	-0.187	0.11073	0.507951	0.583,0.567,0.44	0.746,0.821,0.583	152	149	10,4,4	7,3,5	15,14,10	5,3,7
A3SS1937	ENSG00000196684.12_3	HSH2D	chr19	+	16263841	16264018	16263852	16264018	16263361	16263451	-0.009	1	1	0.058,0.0,0.0	0.085,0.0,0.0	160	149	1,0,0	15,11,10	1,0,0	10,9,11
A3SS1938	ENSG00000196684.12_3	HSH2D	chr19	+	16265208	16265301	16265211	16265301	16263852	16264018	-0.015	1	1	0.956,1.0,1.0	1.0,1.0,1.0	152	149	22,8,11	1,0,0	10,7,9	0,0,0
A3SS1939	ENSG00000062485.18_3	CS	chr12	-	56668785	56668915	56668785	56668832	56669779	56669979	0.006	1	1	0.992,1.0,0.995	0.996,0.992,0.982	232	149	396,303,287	2,0,1	418,406,434	1,2,5
A3SS1940	ENSG00000062485.18_3	CS	chr12	-	56669779	56669979	56669779	56669927	56676203	56676392	-0.015	0.148362	0.61351	0.975,0.943,0.966	0.968,0.975,0.985	201	149	371,269,272	7,12,7	411,429,359	10,8,4
A3SS1941	ENSG00000062485.18_3	CS	chr12	-	56676643	56676775	56676643	56676691	56677575	56677641	0.001	1	1	0.993,1.0,1.0	0.989,1.0,1.0	233	149	451,363,347	2,0,0	540,434,522	4,0,0
A3SS1942	ENSG00000079385.21_3	CEACAM1	chr19	-	43022667	43023387	43022667	43023253	43025418	43025673	-0.019	1	1	1.0,1.0,0.944	1.0,NA,1.0	283	149	45,18,32	0,0,1	3,0,2	0,0,0
A3SS1945	ENSG00000124155.17_4	PIGT	chr20	+	44047411	44047619	44047491	44047619	44045156	44045334	0.003	1	1	0.0,0.007,0.025	0.007,0.01,0.005	229	149	0,2,6	222,196,155	2,2,1	195,129,140
A3SS1947	ENSG00000124155.17_4	PIGT	chr20	+	44047782	44048035	44047934	44048035	44045156	44045334	0.017	1	1	0.142,0.0,0.0	0.09,0.0,0.0	301	149	1,0,0	3,6,1	1,0,0	5,5,6
A3SS1950	ENSG00000124155.17_4	PIGT	chr20	+	44048112	44048230	44048143	44048230	44047934	44048035	-0.006	1	1	0.01,0.005,0.0	0.0,0.013,0.019	180	149	3,1,0	242,177,132	0,2,3	178,126,125
A3SS1951	ENSG00000124155.17_4	PIGT	chr20	+	44048112	44048230	44048147	44048230	44047934	44048035	-0.206	1	1	1.0,1.0,0.0	1.0,1.0,0.618	184	149	8,4,0	0,0,1	2,5,4	0,0,2
A3SS1952	ENSG00000124155.17_4	PIGT	chr20	+	44048143	44048230	44048147	44048230	44047934	44048035	0.003	1	1	1.0,1.0,0.992	1.0,1.0,0.984	153	149	247,180,132	0,0,1	180,129,126	0,0,2
A3SS1953	ENSG00000124155.17_4	PIGT	chr20	+	44048775	44048863	44048792	44048863	44048143	44048230	0.002	1	1	1.0,1.0,1.0	1.0,1.0,0.993	166	149	268,208,146	0,0,0	189,170,168	0,0,1
A3SS1954	ENSG00000124155.17_4	PIGT	chr20	+	44048951	44049069	44048971	44049069	44048775	44048863	0.002	1	1	0.0,0.006,0.0	0.0,0.0,0.0	169	149	0,2,0	335,301,255	0,0,0	339,235,242
A3SS1955	ENSG00000124155.17_4	PIGT	chr20	+	44049147	44049333	44049167	44049333	44048971	44049069	0.017	0.0037862	0.0471142	0.023,0.017,0.037	0.005,0.012,0.009	169	149	10,6,12	381,297,279	2,4,3	330,282,276
A3SS1956	ENSG00000124155.17_4	PIGT	chr20	+	44058084	44058310	44058120	44058310	44056061	44056185	-0.415	1	1	NA,0.287,0.0	1.0,NA,0.118	185	149	0,1,0	0,2,4	3,0,1	0,0,6
A3SS1958	ENSG00000124155.17_4	PIGT	chr20	+	44075282	44076456	44076274	44076456	44058120	44058310	-0.174	1	1	1.0,1.0,0.478	1.0,1.0,1.0	1141	149	6,5,7	0,0,1	3,6,10	0,0,0
A3SS1962	ENSG00000169592.14_4	INO80E	chr16	+	30012532	30012851	30012734	30012851	30012249	30012361	-0.055	0.000995654	0.0177871	0.051,0.048,0.059	0.131,0.111,0.08	351	149	12,10,11	94,84,75	27,22,20	76,75,97
A3SS1963	ENSG00000169592.14_4	INO80E	chr16	+	30012532	30012851	30012785	30012851	30012249	30012361	0.02	1	1	1.0,0.937,1.0	1.0,1.0,0.878	402	149	38,40,25	0,1,0	36,40,39	0,0,2
A3SS1964	ENSG00000169592.14_4	INO80E	chr16	+	30012532	30015978	30015888	30015978	30012249	30012361	-0.114	1	1	0.659,1.0,1.0	1.0,1.0,1.0	3505	149	91,45,91	2,0,0	210,158,190	0,0,0
A3SS1965	ENSG00000169592.14_4	INO80E	chr16	+	30012734	30012851	30012785	30012851	30012249	30012361	0.004	1	1	1.0,0.988,1.0	1.0,1.0,0.977	200	149	120,114,89	0,1,0	85,93,116	0,0,2
A3SS1966	ENSG00000106992.17_3	AK1	chr9	-	130630599	130630791	130630599	130630754	130634101	130634218	-0.03	7.8215e-05	0.00240556	0.961,0.939,0.953	0.983,0.981,0.98	186	149	759,734,660	25,38,26	285,260,245	4,4,4
A3SS1967	ENSG00000106992.17_3	AK1	chr9	-	130635304	130635459	130635304	130635340	130636889	130636928	-0.017	0.0106197	0.0999247	0.01,0.012,0.005	0.023,0.024,0.031	268	149	9,10,4	495,456,419	6,6,7	140,137,123
A3SS1969	ENSG00000168502.17_3	MTCL1	chr18	+	8818960	8819257	8819044	8819257	8812976	8813231	0.006	0.742372	1	0.852,0.95,0.701	0.836,0.768,0.88	233	149	18,30,22	2,1,6	48,31,23	6,6,2
A3SS1970	ENSG00000171206.13_2	TRIM8	chr10	+	104416001	104416142	104416026	104416142	104415862	104415894	0.053	0.0112161	0.103429	0.104,0.066,0.14	0.029,0.052,0.069	174	149	14,8,12	103,97,63	4,7,11	113,110,128
A3SS1971	ENSG00000080503.22_3	SMARCA2	chr9	+	2182140	2182242	2182145	2182242	2181570	2181676	-0.011	1	1	1.0,1.0,0.968	1.0,1.0,1.0	154	149	80,56,63	0,0,2	82,88,108	0,0,0
A3SS1972	ENSG00000244754.8_3	N4BP2L2	chr13	-	33016524	33018261	33016524	33016685	33091993	33092140	-0.007	1	1	0.978,1.0,1.0	1.0,1.0,1.0	1725	149	510,284,550	1,0,0	128,145,187	0,0,0
A3SS1973	ENSG00000244754.8_3	N4BP2L2	chr13	-	33016524	33018263	33016524	33016685	33091993	33092140	-0.007	1	1	0.979,1.0,1.0	1.0,1.0,1.0	1727	149	543,307,583	1,0,0	137,152,190	0,0,0
A3SS1974	ENSG00000244754.8_3	N4BP2L2	chr13	-	33016524	33018263	33016524	33018261	33091993	33092140	0.092	0.485324	1	0.971,0.959,0.945	1.0,0.888,0.712	151	149	34,24,35	1,1,2	9,8,5	0,1,2
A3SS1975	ENSG00000132330.16_3	SCLY	chr2	+	238976705	238976806	238976709	238976806	238972997	238973110	0.007	1	1	0.965,1.0,0.974	0.938,0.98,1.0	153	149	57,47,39	2,0,1	31,51,39	2,1,0
A3SS1976	ENSG00000132330.16_3	SCLY	chr2	+	239006810	239008054	239006842	239008054	239005441	239005517	0.124	1	1	0.121,0.0,0.292	0.0,0.018,0.023	181	149	1,0,1	6,4,2	0,1,1	32,44,35
A3SS1981	ENSG00000100726.14_2	TELO2	chr16	+	1556225	1556330	1556238	1556330	1555410	1555602	-0.004	1	1	0.0,0.051,0.0	0.02,0.043,0.0	162	149	0,1,0	25,17,25	1,2,0	45,41,35
A3SS1982	ENSG00000165097.13_2	KDM1B	chr6	+	18208359	18208437	18208362	18208437	18207628	18207760	-0.117	0.0110684	0.102241	0.042,0.098,0.029	0.164,0.246,0.109	152	149	2,2,1	45,18,33	3,5,1	15,15,8
A3SS1984	ENSG00000179361.17_3	ARID3B	chr15	+	74885475	74885577	74885478	74885577	74883900	74884155	0.137	0.00390639	0.048167	0.123,0.255,0.303	0.269,0.0,0.0	152	149	2,7,8	14,20,18	3,0,0	8,9,9
A3SS1985	ENSG00000121775.17_2	TMEM39B	chr1	+	32541203	32541423	32541267	32541423	32540551	32540678	-0.008	1	1	1.0,0.979,0.976	0.98,1.0,1.0	213	149	53,67,59	0,1,1	71,69,63	1,0,0
A3SS1986	ENSG00000214517.9_3	PPME1	chr11	+	73957078	73957250	73957120	73957250	73950177	73950301	0	1	1	0.009,0.0,0.011	0.009,0.011,0.0	191	149	3,0,3	247,157,211	2,2,0	165,142,138
A3SS1987	ENSG00000241468.7_3	ATP5J2	chr7	-	99057708	99057846	99057708	99057816	99063751	99063790	0.001	1	1	0.002,0.002,0.0	0.0,0.001,0.0	179	149	2,2,0	1023,878,797	0,1,0	785,826,972
A3SS1988	ENSG00000054523.17_3	KIF1B	chr1	+	10342379	10342591	10342457	10342591	10338043	10338186	0.001	0.674999	1	0.046,0.0,0.11	0.113,0.041,0.0	227	149	4,0,9	54,37,48	6,2,0	31,31,26
A3SS1989	ENSG00000054523.17_3	KIF1B	chr1	+	10342379	10342591	10342457	10342591	10339154	10339196	0.5	1	1	1.0,NA,1.0	0.0,1.0,NA	227	149	2,0,3	0,0,0	0,1,0	1,0,0
A3SS1993	ENSG00000245750.7_2	DRAIC	chr15	+	69857532	69857866	69857562	69857866	69855928	69856143	-0.688	1	1	NA,0.625,0.0	NA,1.0,NA	179	149	0,2,0	0,1,2	0,1,0	0,0,0
A3SS1997	ENSG00000158856.18_3	DMTN	chr8	+	21926526	21927029	21926929	21927029	21925037	21925193	-0.375	0.000903269	0.0163525	0.447,0.519,0.288	0.759,0.911,0.708	552	149	21,8,6	7,2,4	35,38,36	3,1,4
A3SS1998	ENSG00000244306.10_2	DUXAP10	chr14	-	19919491	19919629	19919491	19919605	19921358	19921470	0.85	1	1	NA,NA,1.0	0.0,NA,0.301	173	149	0,0,1	0,0,0	0,0,1	2,0,2
A3SS2000	ENSG00000147789.15_2	ZNF7	chr8	+	146054811	146054989	146054829	146054989	146054427	146054475	-0.333	1	1	0.0,NA,NA	0.0,0.0,1.0	167	149	0,0,0	5,0,0	0,0,1	6,2,0
A3SS2001	ENSG00000147789.15_2	ZNF7	chr8	+	146054811	146054989	146054862	146054989	146054427	146054475	0.054	1	1	0.176,0.13,0.0	0.096,0.0,0.047	200	149	2,1,0	7,5,11	1,0,1	7,13,15
A3SS2002	ENSG00000147789.15_2	ZNF7	chr8	+	146054811	146054989	146054907	146054989	146054427	146054475	-0.268	0.596155	1	0.646,1.0,0.549	1.0,1.0,1.0	245	149	3,3,4	1,0,2	5,8,8	0,0,0
A3SS2003	ENSG00000147789.15_2	ZNF7	chr8	+	146054829	146054989	146054862	146054989	146054427	146054475	0.01	0.872713	1	0.45,0.141,0.0	0.45,0.112,0.0	182	149	7,1,0	7,5,11	7,2,0	7,13,15
A3SS2004	ENSG00000147789.15_2	ZNF7	chr8	+	146054829	146054989	146054907	146054989	146054427	146054475	-0.197	0.602122	1	0.84,1.0,0.568	1.0,1.0,1.0	227	149	8,3,4	1,0,2	11,10,7	0,0,0
A3SS2005	ENSG00000147789.15_2	ZNF7	chr8	+	146054862	146054989	146054907	146054989	146054427	146054475	-0.096	0.580998	1	0.86,1.0,0.852	1.0,1.0,1.0	194	149	8,7,15	1,0,2	11,21,22	0,0,0
A3SS2006	ENSG00000147789.15_2	ZNF7	chr8	+	146062775	146062892	146062778	146062892	146054862	146054989	-0.119	0.0360668	0.238046	0.746,0.927,0.915	1.0,1.0,0.946	152	149	9,13,11	3,1,1	9,20,18	0,0,1
A3SS2010	ENSG00000175455.14_4	CCDC14	chr3	-	123632571	123634565	123632571	123633979	123649948	123650081	-0.072	0.000781484	0.0148427	0.937,0.872,0.914	0.973,0.979,0.986	735	149	294,168,261	4,5,5	708,696,690	4,3,2
A3SS2014	ENSG00000109911.18_2	ELP4	chr11	+	31625311	31625454	31625314	31625454	31616316	31616448	-0.093	0.0984864	0.473027	0.176,0.221,0.091	0.117,0.345,0.305	152	149	10,13,4	46,45,39	7,22,21	52,41,47
A3SS2015	ENSG00000104231.10_3	ZFAND1	chr8	-	82615203	82615359	82615203	82615338	82626152	82626274	0.009	0.13125	0.566099	1.0,0.983,0.99	0.969,0.987,0.99	170	149	165,130,110	0,2,1	388,265,342	11,3,3
A3SS2016	ENSG00000104231.10_3	ZFAND1	chr8	-	82627038	82627349	82627038	82627130	82630416	82630459	0.005	1	1	1.0,1.0,1.0	1.0,1.0,0.985	368	149	125,86,94	0,0,0	156,146,163	0,0,1
A3SS2017	ENSG00000104728.15_4	ARHGEF10	chr8	+	1812535	1812602	1812538	1812602	1808062	1808350	0.042	0.759376	1	0.477,0.782,0.662	0.595,0.56,0.641	152	149	13,11,12	14,3,6	18,13,20	12,10,11
A3SS2018	ENSG00000104728.15_4	ARHGEF10	chr8	+	1846598	1846691	1846601	1846691	1844498	1844615	0.051	0.0339652	0.227542	0.957,1.0,1.0	0.92,0.884,1.0	152	149	45,20,27	2,0,0	35,31,42	3,4,0
A3SS2019	ENSG00000104728.15_4	ARHGEF10	chr8	+	1873448	1873570	1873451	1873570	1871939	1872040	-0.008	1	1	1.0,1.0,0.977	1.0,1.0,1.0	152	149	55,45,43	0,0,1	67,59,57	0,0,0
A3SS2022	ENSG00000100906.10_2	NFKBIA	chr14	-	35871599	35871869	35871599	35871740	35871976	35872065	0.015	0.0780864	0.405645	0.968,0.977,0.988	0.966,0.955,0.967	278	149	854,856,749	15,11,5	586,474,495	11,12,9
A3SS2023	ENSG00000184925.11_2	LCN12	chr9	+	139847917	139848231	139847939	139848231	139847343	139847480	1	1	1	1.0,NA,NA	NA,NA,0.0	171	149	1,0,0	0,0,0	0,0,0	0,0,2
A3SS2024	ENSG00000184925.11_2	LCN12	chr9	+	139847917	139848231	139848151	139848231	139847343	139847480	0.918	1	1	1.0,NA,NA	0.163,0.0,NA	383	149	1,0,0	0,0,0	1,0,0	2,2,0
A3SS2029	ENSG00000163930.9_2	BAP1	chr3	-	52436794	52436956	52436794	52436887	52437153	52437314	0.006	0.68043	1	0.047,0.036,0.06	0.04,0.044,0.041	218	149	14,9,12	194,167,129	14,14,10	231,209,158
A3SS2030	ENSG00000163930.9_2	BAP1	chr3	-	52440268	52440392	52440268	52440338	52440844	52440923	-0.036	0.146284	0.609105	0.898,0.876,0.899	0.916,0.895,0.971	203	149	144,106,85	12,11,7	134,140,136	9,12,3
A3SS2033	ENSG00000178188.14_3	SH2B1	chr16	+	28880528	28880704	28880597	28880704	28880326	28880418	0.001	1	1	0.991,1.0,1.0	1.0,0.989,1.0	218	149	161,115,100	1,0,0	124,131,159	0,1,0
A3SS2034	ENSG00000140350.15_2	ANP32A	chr15	-	69079751	69079874	69079751	69079834	69080108	69080258	0	1	1	1.0,1.0,1.0	1.0,1.0,0.999	189	149	1140,866,878	0,0,0	926,757,971	0,0,1
A3SS2036	ENSG00000112701.17_3	SENP6	chr6	+	76350399	76350420	76350402	76350420	76344422	76344527	0.025	0.724537	1	0.62,0.567,0.282	0.407,0.572,0.415	152	149	10,4,2	6,3,5	7,15,13	10,11,18
A3SS2037	ENSG00000121152.9_3	NCAPH	chr2	+	97007412	97007632	97007451	97007632	97001538	97001586	0.074	0.155716	0.635666	0.853,0.956,0.839	0.672,0.88,0.874	188	149	66,55,46	9,2,7	31,37,35	12,4,4
A3SS2038	ENSG00000105053.10_3	VRK3	chr19	-	50512492	50512642	50512492	50512546	50519280	50519420	-0.007	1	1	0.979,1.0,1.0	1.0,1.0,1.0	245	149	78,49,61	1,0,0	59,57,71	0,0,0
A3SS2039	ENSG00000172977.12_3	KAT5	chr11	+	65481965	65482214	65482130	65482214	65481244	65481319	-0.048	2.41043e-05	0.000912424	0.935,0.964,0.949	1.0,0.992,1.0	314	149	272,284,237	9,5,6	261,258,228	0,1,0
A3SS2040	ENSG00000146802.12_2	TMEM168	chr7	-	112412835	112413110	112412835	112412873	112415230	112415373	0.011	1	1	0.954,1.0,1.0	0.967,1.0,0.954	386	149	54,36,38	1,0,0	77,68,54	1,0,1
A3SS2041	ENSG00000138614.14_2	INTS14	chr15	-	65885765	65885910	65885765	65885907	65888070	65888163	0	1	1	1.0,1.0,0.976	1.0,1.0,0.976	152	149	69,50,41	0,0,1	115,107,82	0,0,2
A3SS2042	ENSG00000138614.14_2	INTS14	chr15	-	65897466	65897574	65897466	65897570	65899639	65899780	0.04	1	1	1.0,1.0,1.0	1.0,0.88,1.0	153	149	1,1,1	0,0,0	3,15,8	0,2,0
A3SS2043	ENSG00000113811.10_2	SELENOK	chr3	-	53919852	53919939	53919852	53919931	53920877	53920961	-0.002	1	1	0.998,0.996,0.993	0.996,0.996,1.0	157	149	591,547,449	1,2,3	291,255,315	1,1,0
A3SS2045	ENSG00000143850.13_3	PLEKHA6	chr1	-	204230433	204230636	204230433	204230576	204234069	204234170	0.293	5.25432e-08	4.37563e-06	0.941,0.914,0.903	0.547,0.645,0.687	209	149	45,60,65	2,4,5	22,28,40	13,11,13
A3SS2047	ENSG00000145425.9_2	RPS3A	chr4	+	152025328	152025438	152025336	152025438	152024022	152024231	0	1	1	1.0,0.999,1.0	0.999,1.0,0.999	157	149	4486,4206,3657	0,5,1	5413,4995,5565	3,2,3
A3SS2049	ENSG00000101104.12_2	PABPC1L	chr20	+	43559100	43559367	43559158	43559367	43552801	43552897	0.104	0.00640086	0.0687457	0.21,0.116,0.168	0.034,0.093,0.055	207	149	7,2,7	19,11,25	2,5,3	41,35,37
A3SS2050	ENSG00000101104.12_2	PABPC1L	chr20	+	43566685	43566832	43566701	43566832	43565277	43565371	0.008	1	1	0.0,0.114,0.0	0.0,0.05,0.039	165	149	0,1,0	9,7,6	0,1,1	23,17,22
A3SS2051	ENSG00000101104.12_2	PABPC1L	chr20	+	43566685	43566832	43566742	43566832	43565277	43565371	-0.004	0.299407	0.946664	0.835,1.0,0.743	1.0,0.591,1.0	206	149	7,3,4	1,0,1	5,8,6	0,4,0
A3SS2052	ENSG00000101104.12_2	PABPC1L	chr20	+	43566701	43566832	43566742	43566832	43565277	43565371	-0.004	1	1	0.926,1.0,0.887	1.0,0.825,1.0	190	149	16,9,10	1,0,1	28,24,27	0,4,0
A3SS2054	ENSG00000074582.12_2	BCS1L	chr2	+	219527232	219527402	219527237	219527402	219526919	219526983	0.073	0.129593	0.56119	0.924,0.956,0.97	0.938,0.763,0.931	154	149	50,45,34	4,2,1	47,20,28	3,6,2
A3SS2055	ENSG00000074582.12_2	BCS1L	chr2	+	219527856	219528165	219527965	219528165	219527605	219527723	-0.013	0.695169	1	1.0,0.945,0.966	1.0,1.0,0.949	258	149	62,59,49	0,2,1	54,50,32	0,0,1
A3SS2059	ENSG00000224843.6_3	LINC00240	chr6	+	26991528	26991703	26991543	26991703	26991032	26991176	-0.029	1	1	0.232,0.377,0.732	0.476,0.476,NA	164	149	2,2,3	6,3,1	2,2,0	2,2,0
A3SS2060	ENSG00000241769.7_4	LINC00893	chrX	-	148617705	148617787	148617705	148617745	148619646	148619704	0.5	1	1	1.0,1.0,1.0	0.0,1.0,NA	191	149	1,1,4	0,0,0	0,3,0	3,0,0
A3SS2062	ENSG00000118181.10_2	RPS25	chr11	-	118888071	118888255	118888071	118888143	118888667	118888763	-0.001	1	1	0.996,0.995,0.993	0.996,0.996,0.994	261	149	7768,7361,6204	17,19,26	7843,7438,8713	19,18,31
A3SS2064	ENSG00000123411.14_3	IKZF4	chr12	+	56413101	56413199	56413104	56413199	56411909	56411961	0.144	0.139444	0.589698	0.797,1.0,0.831	1.0,1.0,0.197	152	149	4,3,5	1,0,1	3,2,1	0,0,4
A3SS2066	ENSG00000157540.19_3	DYRK1A	chr21	+	38850482	38850602	38850509	38850602	38844985	38845182	0.074	0.156743	0.637829	0.31,0.297,0.361	0.266,0.209,0.27	176	149	17,13,22	32,26,33	18,10,14	42,32,32
A3SS2067	ENSG00000175061.17_2	LRRC75A-AS1	chr17	+	16342841	16343017	16342894	16343017	16342640	16342728	0.078	6.15017e-05	0.00200547	0.761,0.847,0.78	0.722,0.738,0.694	202	149	756,707,588	175,94,122	1687,1832,1921	480,480,624
A3SS2068	ENSG00000175061.17_2	LRRC75A-AS1	chr17	+	16342841	16343017	16342973	16343017	16342640	16342728	-0.02	0.195371	0.730347	0.817,0.859,0.807	0.867,0.838,0.838	281	149	1067,920,814	127,80,103	2334,2498,2721	190,256,279
A3SS2069	ENSG00000175061.17_2	LRRC75A-AS1	chr17	+	16342894	16343017	16342973	16343017	16342640	16342728	-0.064	0.00350922	0.0443818	0.714,0.715,0.688	0.795,0.745,0.769	228	149	486,307,348	127,80,103	1127,1146,1424	190,256,279
A3SS2070	ENSG00000175061.17_2	LRRC75A-AS1	chr17	+	16342894	16343567	16343424	16343567	16342640	16342728	0.013	1	1	1.0,1.0,1.0	0.976,0.992,0.994	679	149	210,118,160	0,0,0	565,559,723	3,1,1
A3SS2071	ENSG00000175061.17_2	LRRC75A-AS1	chr17	+	16342894	16343567	16343498	16343567	16342640	16342728	-0.086	0	0	0.04,0.023,0.039	0.129,0.117,0.114	753	149	217,118,164	1023,991,803	583,575,738	781,862,1133
A3SS2072	ENSG00000175061.17_2	LRRC75A-AS1	chr17	+	16343424	16343567	16343498	16343567	16342640	16342728	-0.011	0.2504	0.845333	0.005,0.0,0.003	0.018,0.013,0.009	223	149	7,0,4	1023,991,803	21,17,16	781,862,1133
A3SS2073	ENSG00000175061.17_2	LRRC75A-AS1	chr17	+	16343424	16343567	16343498	16343567	16342841	16343017	-0.002	0.861092	1	0.009,0.004,0.014	0.013,0.009,0.011	223	149	9,3,10	684,508,479	27,21,28	1414,1479,1731
A3SS2074	ENSG00000175061.17_2	LRRC75A-AS1	chr17	+	16366477	16366561	16366480	16366561	16366146	16366255	-0.044	0.0114535	0.104758	0.495,0.0,0.329	0.495,0.263,0.197	152	149	1,0,1	1,4,2	2,4,1	2,11,4
A3SS2075	ENSG00000267426.5_4	AC087289.3	chr17	-	73897792	73898001	73897792	73897997	73898100	73898235	0.042	0.00146644	0.023766	0.981,0.974,0.983	0.929,0.952,0.93	153	149	157,154,121	3,4,2	135,101,95	10,5,7
A3SS2076	ENSG00000134802.17_3	SLC43A3	chr11	-	57193013	57193182	57193013	57193143	57193461	57193789	0.036	0.000799816	0.0150651	0.065,0.065,0.091	0.033,0.044,0.037	188	149	24,16,27	274,181,213	13,19,18	302,327,375
A3SS2077	ENSG00000134802.17_3	SLC43A3	chr11	-	57193461	57193825	57193461	57193789	57194060	57194125	-0.012	0.661303	1	1.0,0.965,0.988	0.995,0.995,1.0	185	149	221,205,201	0,6,2	231,226,215	1,1,0
A3SS2078	ENSG00000134802.17_3	SLC43A3	chr11	-	57193461	57193862	57193461	57193789	57194060	57194125	-0.048	0.0275241	0.196295	1.0,0.864,0.962	0.985,0.986,1.0	222	149	101,57,75	0,6,2	95,102,150	1,1,0
A3SS2079	ENSG00000134802.17_3	SLC43A3	chr11	-	57193461	57193862	57193461	57193825	57194060	57194125	-0.092	0.00384753	0.0476584	0.197,0.08,0.137	0.168,0.187,0.335	186	149	53,18,31	173,166,157	46,50,110	182,174,175
A3SS2080	ENSG00000134802.17_3	SLC43A3	chr11	-	57194060	57194223	57194060	57194125	57194358	57194516	-0.272	0.00420615	0.0509349	0.326,0.044,0.326	0.514,0.393,0.606	247	149	12,1,8	15,13,10	14,15,28	8,14,11
A3SS2081	ENSG00000134802.17_3	SLC43A3	chr11	-	57194060	57194223	57194060	57194125	57194534	57194594	-0.065	0.000122206	0.00346896	0.093,0.017,0.038	0.087,0.1,0.156	247	149	22,3,7	130,103,108	20,22,39	126,119,127
A3SS2082	ENSG00000004399.12_3	PLXND1	chr3	-	129274056	129275271	129274056	129274386	129275459	129275534	-0.011	0.293138	0.933084	0.962,0.971,0.95	0.976,0.952,0.988	1034	149	879,696,656	5,3,5	557,556,567	2,4,1
A3SS2083	ENSG00000004399.12_3	PLXND1	chr3	-	129304794	129304924	129304794	129304891	129305014	129305115	0.004	0.844051	1	0.944,0.964,0.901	0.938,0.918,0.94	182	149	83,65,67	4,2,6	74,68,57	4,5,3
A3SS2087	ENSG00000167216.16_4	KATNAL2	chr18	+	44580766	44580809	44580769	44580809	44579250	44579417	-0.5	1	1	1.0,0.0,NA	1.0,NA,NA	152	149	1,0,0	0,1,0	1,0,0	0,0,0
A3SS2089	ENSG00000134758.13_3	RNF138	chr18	+	29706655	29706763	29706689	29706763	29704696	29704808	-0.001	1	1	1.0,1.0,0.989	1.0,0.993,1.0	183	149	134,93,107	0,0,1	211,169,190	0,1,0
A3SS2090	ENSG00000171703.16_3	TCEA2	chr20	+	62701841	62701988	62701844	62701988	62701612	62701767	-0.017	0.273812	0.897182	0.978,0.962,0.995	0.996,1.0,0.99	152	149	222,153,220	5,6,1	466,341,302	2,0,3
A3SS2091	ENSG00000171703.16_3	TCEA2	chr20	+	62703210	62703294	62703222	62703294	62701841	62701988	0.01	0.53337	1	0.0,0.021,0.051	0.006,0.007,0.029	161	149	0,2,5	97,86,86	1,1,5	158,135,153
A3SS2092	ENSG00000171703.16_3	TCEA2	chr20	+	62703222	62703699	62703524	62703699	62701841	62701988	-0.011	1	1	1.0,1.0,0.967	1.0,1.0,1.0	451	149	99,86,90	0,0,1	164,143,161	0,0,0
A3SS2093	ENSG00000172375.12_2	C2CD2L	chr11	+	118984561	118984698	118984564	118984698	118984320	118984422	-0.036	0.912983	1	0.219,0.219,0.229	0.329,0.164,0.282	152	149	10,8,10	35,28,33	2,5,10	4,25,25
A3SS2102	ENSG00000167775.10_3	CD320	chr19	-	8368738	8368972	8368738	8368857	8369914	8370040	0.012	1	1	1.0,1.0,1.0	1.0,0.963,1.0	264	149	236,260,225	0,0,0	104,138,100	0,3,0
A3SS2103	ENSG00000178078.11_2	STAP2	chr19	-	4324451	4324661	4324451	4324526	4325212	4325305	-0.068	0.2843	0.912761	0.389,0.099,0.46	0.436,0.361,0.354	284	149	17,4,13	14,19,8	28,14,23	19,13,22
A3SS2104	ENSG00000178078.11_2	STAP2	chr19	-	4324451	4324664	4324451	4324526	4325212	4325305	-0.035	0.631621	1	0.491,0.141,0.588	0.54,0.5,0.286	287	149	26,6,22	14,19,8	43,25,17	19,13,22
A3SS2105	ENSG00000178078.11_2	STAP2	chr19	-	4324451	4324664	4324451	4324661	4325212	4325305	0.117	0.224797	0.795312	0.71,0.746,0.844	0.774,0.786,0.388	152	149	15,3,11	6,1,2	21,15,11	6,4,17
A3SS2106	ENSG00000214719.11_3	AC005562.1	chr17	+	28937906	28937960	28937911	28937960	28935447	28935580	0.001	0.876491	1	0.972,1.0,0.986	0.988,0.986,0.982	154	149	179,165,142	5,0,2	82,71,111	1,1,2
A3SS2107	ENSG00000168765.16_2	GSTM4	chr1	+	110199971	110200293	110200211	110200293	110199333	110199409	-0.17	1	1	0.697,1.0,0.793	NA,1.0,1.0	389	149	12,7,20	2,0,2	0,2,6	0,0,0
A3SS2109	ENSG00000168765.16_2	GSTM4	chr1	+	110199971	110200293	110200211	110200293	110199836	110199901	0.016	0.00388226	0.0479787	0.021,0.018,0.045	0.0,0.018,0.018	389	149	12,9,22	215,193,178	0,4,6	108,86,122
A3SS2110	ENSG00000168765.16_2	GSTM4	chr1	+	110200154	110200293	110200211	110200293	110199836	110199901	0.004	1	1	0.013,0.011,0.012	0.0,0.017,0.006	206	149	4,3,3	215,193,178	0,2,1	108,86,122
A3SS2111	ENSG00000197299.10_2	BLM	chr15	+	91303210	91303509	91303376	91303509	91298040	91298168	0.003	1	1	0.008,0.0,0.0	0.0,0.0,0.0	315	149	1,0,0	62,38,46	0,0,0	73,69,68
A3SS2112	ENSG00000167862.9_3	MRPL58	chr17	+	73016561	73016752	73016582	73016752	73016407	73016490	-0.009	0.389144	1	0.038,0.046,0.036	0.071,0.053,0.022	170	149	6,6,4	134,108,95	14,11,4	161,171,154
A3SS2115	ENSG00000140332.15_2	TLE3	chr15	-	70358352	70358557	70358352	70358554	70366871	70366946	0.025	0.872823	1	0.877,0.88,0.92	0.915,0.79,0.898	152	149	80,75,82	11,10,7	33,23,45	3,6,5
A3SS2116	ENSG00000153234.13_3	NR4A2	chr2	-	157182661	157182840	157182661	157182719	157183229	157183432	0.074	0.33105	0.999427	0.894,0.724,0.773	0.728,0.847,0.595	270	149	61,38,37	4,8,6	34,20,16	7,2,6
A3SS2117	ENSG00000153234.13_3	NR4A2	chr2	-	157185834	157186700	157185834	157186522	157187179	157187303	-0.176	0.0052113	0.059638	0.829,0.659,0.748	0.938,0.827,1.0	327	149	32,17,13	3,4,2	33,21,17	1,2,0
A3SS2119	ENSG00000237441.9_2	RGL2	chr6	-	33261189	33261476	33261189	33261301	33261571	33261693	-0.487	6.53033e-13	1.76743e-10	0.525,0.365,0.558	0.91,1.0,1.0	324	149	24,15,22	10,12,8	22,38,32	1,0,0
A3SS2120	ENSG00000090612.20_3	ZNF268	chr12	+	133764450	133764658	133764457	133764658	133758531	133758616	-0.163	1	1	0.0,0.0,0.0	0.0,0.0,0.489	156	149	0,0,0	13,8,13	0,0,1	6,6,1
A3SS2121	ENSG00000090612.20_3	ZNF268	chr12	+	133768074	133768201	133768119	133768201	133764457	133764658	0.164	0.324078	0.987188	1.0,0.86,1.0	0.535,1.0,0.833	194	149	19,8,15	0,1,0	3,13,13	2,0,2
A3SS2122	ENSG00000120708.16_3	TGFBI	chr5	+	135382023	135382704	135382539	135382704	135379746	135379811	-0.008	1	1	0.977,1.0,1.0	1.0,1.0,1.0	665	149	187,141,205	1,0,0	293,278,239	0,0,0
A3SS2124	ENSG00000120708.16_3	TGFBI	chr5	+	135390363	135390550	135390404	135390550	135389631	135389769	0.005	0.507471	1	0.039,0.048,0.02	0.018,0.048,0.025	190	149	17,17,6	331,264,235	10,28,14	433,433,431
A3SS2125	ENSG00000078674.17_2	PCM1	chr8	+	17815045	17815284	17815048	17815284	17814772	17814930	0.024	0.568072	1	0.114,0.068,0.14	0.073,0.119,0.059	152	149	8,2,6	61,27,36	11,17,8	136,123,125
A3SS2129	ENSG00000127419.16_3	TMEM175	chr4	+	945433	945505	945469	945505	944994	945046	-0.22	1	1	0.0,NA,0.446	0.264,0.491,0.573	185	149	0,0,2	4,0,2	4,6,5	9,5,3
A3SS2130	ENSG00000072849.10_3	DERL2	chr17	-	5383706	5383863	5383706	5383779	5384420	5384462	-0.03	0.0113563	0.104367	0.973,0.949,0.961	0.98,1.0,0.992	233	149	167,145,156	3,5,4	151,139,190	2,0,1
A3SS2132	ENSG00000159140.19_4	SON	chr21	+	34948670	34949787	34948723	34949787	34948083	34948199	-0.021	0.390894	1	0.099,0.079,0.138	0.093,0.091,0.195	202	149	15,9,15	101,77,69	9,8,22	65,59,67
A3SS2136	ENSG00000172113.8_3	NME6	chr3	-	48337608	48337726	48337608	48337648	48338216	48338319	-0.063	0.52875	1	0.216,0.068,0.298	0.464,0.185,0.121	227	149	13,2,11	31,18,17	29,10,9	22,29,43
A3SS2137	ENSG00000152359.14_3	POC5	chr5	-	74998429	74998657	74998429	74998635	75001528	75001612	0.023	0.901666	1	0.042,0.0,0.028	0.0,0.0,0.0	171	149	2,0,1	40,31,30	0,0,0	54,49,76
A3SS2142	ENSG00000088836.12_3	SLC4A11	chr20	-	3210169	3210422	3210169	3210352	3210832	3210906	-0.014	1	1	0.959,1.0,1.0	1.0,1.0,1.0	219	149	34,33,29	1,0,0	9,14,8	0,0,0
A3SS2143	ENSG00000140400.16_3	MAN2C1	chr15	-	75648641	75648790	75648641	75648721	75648946	75649026	-0.001	1	1	0.911,1.0,0.872	0.916,0.95,0.921	218	149	15,6,10	1,0,1	16,28,17	1,1,1
A3SS2144	ENSG00000140400.16_3	MAN2C1	chr15	-	75651399	75651766	75651399	75651494	75651960	75652116	-0.222	0.504288	1	0.469,0.761,1.0	1.0,1.0,0.895	421	149	5,9,14	2,1,0	28,36,24	0,0,1
A3SS2146	ENSG00000140400.16_3	MAN2C1	chr15	-	75654195	75654366	75654195	75654288	75654683	75654794	-0.018	1	1	0.0,0.0,0.0	0.053,0.0,0.0	227	149	0,0,0	10,6,12	3,0,0	35,25,30
A3SS2147	ENSG00000140400.16_3	MAN2C1	chr15	-	75659851	75659986	75659851	75659975	75660413	75660539	-0.019	1	1	0.0,0.0,0.0	0.0,0.057,0.0	160	149	0,0,0	7,4,10	0,2,0	26,31,27
A3SS2148	ENSG00000140400.16_3	MAN2C1	chr15	-	75659851	75660318	75659851	75659975	75660413	75660539	-0.011	1	1	0.0,0.0,0.0	0.012,0.0,0.022	492	149	0,0,0	7,4,10	1,0,2	26,31,27
A3SS2150	ENSG00000140400.16_3	MAN2C1	chr15	-	75660413	75660539	75660413	75660500	75660823	75660953	-0.131	0.696109	1	1.0,0.798,0.665	0.856,1.0,1.0	188	149	11,5,5	0,1,2	15,9,18	2,0,0
A3SS2152	ENSG00000197530.12_3	MIB2	chr1	+	1558768	1558862	1558810	1558862	1551887	1551994	-0.063	0.382905	1	0.937,0.83,0.609	0.886,1.0,0.679	191	149	19,25,22	1,4,11	10,17,19	1,0,7
A3SS2153	ENSG00000197530.12_3	MIB2	chr1	+	1560925	1561033	1560937	1561033	1560665	1560808	0.038	0.0464233	0.28077	0.866,1.0,0.953	0.833,0.94,0.931	161	149	14,18,22	2,0,1	27,17,29	5,1,2
A3SS2154	ENSG00000197530.12_3	MIB2	chr1	+	1560925	1562134	1562029	1562134	1560665	1560808	-0.231	0.0198674	0.157456	0.185,0.333,0.408	0.461,0.526,0.633	1253	149	21,21,29	11,5,5	36,28,29	5,3,2
A3SS2155	ENSG00000197530.12_3	MIB2	chr1	+	1563652	1564102	1563868	1564102	1563398	1563559	0.008	1	1	1.0,1.0,1.0	1.0,1.0,0.977	365	149	91,80,72	0,0,0	94,87,102	0,0,1
A3SS2156	ENSG00000197530.12_3	MIB2	chr1	+	1564413	1564691	1564512	1564691	1563868	1564102	0.024	0.112771	0.514698	0.031,0.041,0.087	0.0,0.076,0.01	248	149	2,4,6	37,56,38	0,7,1	70,51,57
A3SS2157	ENSG00000120699.12_3	EXOSC8	chr13	+	37578613	37578698	37578652	37578698	37577070	37577144	-0.007	0.86875	1	0.01,0.011,0.0	0.011,0.009,0.022	188	149	3,3,0	245,206,195	4,3,8	288,276,279
A3SS2158	ENSG00000120699.12_3	EXOSC8	chr13	+	37582193	37582314	37582198	37582314	37581111	37581208	0.022	0.00181105	0.0273833	0.979,0.992,0.989	0.972,0.973,0.95	154	149	246,246,186	5,2,2	398,335,317	11,9,16
A3SS2159	ENSG00000169242.11_2	EFNA1	chr1	+	155105978	155106256	155106205	155106256	155103814	155104110	-0.105	1.77448e-07	1.31579e-05	0.913,0.838,0.869	0.957,1.0,0.977	376	149	213,183,168	8,14,10	169,208,215	3,0,2
A3SS2160	ENSG00000156831.7_4	NSMCE2	chr8	+	126114255	126114388	126114292	126114388	126104085	126104200	0.135	0.00149296	0.0240518	0.293,0.292,0.297	0.167,0.072,0.238	186	149	48,33,28	93,64,53	11,5,21	44,52,54
A3SS2163	ENSG00000185684.13_3	EP400NL	chr12	+	132588922	132589849	132589111	132589849	132588541	132588715	1	1	1	NA,NA,1.0	0.0,0.0,0.0	338	149	0,0,1	0,0,0	0,0,0	2,1,2
A3SS2169	ENSG00000196557.12_1	CACNA1H	chr16	+	1261945	1262138	1262007	1262138	1261715	1261805	0.261	0.629567	1	0.927,0.857,1.0	1.0,1.0,0.0	211	149	18,17,17	1,2,0	2,2,0	0,0,2
A3SS2170	ENSG00000196557.12_1	CACNA1H	chr16	+	1268969	1269130	1269002	1269130	1268209	1268651	-0.259	1	1	0.672,0.732,0.818	1.0,NA,NA	182	149	15,10,11	6,3,2	3,0,0	0,0,0
A3SS2171	ENSG00000159884.11_3	CCDC107	chr9	+	35660742	35660855	35660762	35660855	35660553	35660644	-0.015	0.322395	0.984864	0.954,1.0,0.923	0.977,1.0,0.946	169	149	47,53,41	2,0,3	49,37,40	1,0,2
A3SS2172	ENSG00000152422.15_3	XRCC4	chr5	+	82648943	82649530	82648949	82649530	82554348	82554496	-0.035	0.461479	1	0.532,0.625,0.469	0.614,0.552,0.564	155	149	39,33,34	33,19,37	48,32,31	29,25,23
A3SS2173	ENSG00000185485.14_2	SDHAP1	chr3	-	195692299	195692448	195692299	195692413	195694384	195694515	-0.147	0.0200811	0.158572	0.195,0.0,0.178	0.342,0.168,0.304	184	149	3,0,4	10,15,15	9,4,7	14,16,13
A3SS2174	ENSG00000185485.14_2	SDHAP1	chr3	-	195709032	195709223	195709032	195709181	195710982	195711147	-0.02	0.555619	1	0.0,0.0,0.1	0.053,0.107,0.0	191	149	0,0,2	6,11,14	1,2,0	14,13,8
A3SS2176	ENSG00000100416.12_2	TRMU	chr22	+	46746187	46746360	46746242	46746360	46742318	46742441	0.198	8.6211e-12	1.50536e-09	0.976,0.965,0.903	0.701,0.755,0.794	204	149	169,150,141	3,4,11	74,80,74	23,19,14
A3SS2177	ENSG00000100416.12_2	TRMU	chr22	+	46746187	46746360	46746246	46746360	46742318	46742441	0.055	0.0655743	0.361829	0.931,0.9,0.936	0.855,0.891,0.857	208	149	169,151,142	9,12,7	74,80,75	9,7,9
A3SS2178	ENSG00000100416.12_2	TRMU	chr22	+	46746242	46746360	46746246	46746360	46742318	46742441	-0.3	0.00854992	0.0852315	0.245,0.289,0.625	0.713,0.726,0.619	153	149	3,5,12	9,12,7	23,19,15	9,7,9
A3SS2179	ENSG00000161265.14_4	U2AF1L4	chr19	-	36234055	36234109	36234055	36234106	36234196	36234246	-0.168	1	1	0.495,1.0,1.0	NA,1.0,NA	152	149	1,2,1	1,0,0	0,1,0	0,0,0
A3SS2181	ENSG00000161265.14_4	U2AF1L4	chr19	-	36235223	36235639	36235223	36235322	36236025	36236088	0.155	0.0103758	0.0985336	0.908,1.0,1.0	0.77,0.77,0.903	466	149	31,7,16	1,0,0	21,21,29	2,2,1
A3SS2182	ENSG00000161265.14_4	U2AF1L4	chr19	-	36235223	36235882	36235223	36235322	36236025	36236113	0.103	1	1	0.0,NA,1.0	0.296,0.24,0.654	709	149	0,0,8	1,0,0	4,3,9	2,2,1
A3SS2183	ENSG00000041988.15_4	THAP3	chr1	+	6690347	6690413	6690350	6690413	6688558	6688751	-0.017	0.624664	1	0.873,0.891,0.776	0.909,0.86,0.821	152	149	56,67,60	8,8,17	61,50,56	6,8,12
A3SS2185	ENSG00000257433.5_4	AC004241.1	chr12	+	48113382	48113482	48113387	48113482	48112929	48113055	-0.69	1	1	NA,0.0,NA	0.326,1.0,0.744	154	149	0,0,0	0,1,0	3,3,3	6,0,1
A3SS2188	ENSG00000149809.14_3	TM7SF2	chr11	+	64880282	64880886	64880691	64880886	64879986	64880183	-0.323	1	1	0.516,1.0,0.516	1.0,1.0,1.0	558	149	4,10,4	1,0,1	3,6,3	0,0,0
A3SS2189	ENSG00000149809.14_3	TM7SF2	chr11	+	64880282	64880886	64880840	64880886	64879986	64880183	0.01	1	1	1.0,0.747,1.0	1.0,1.0,0.717	707	149	10,14,12	0,1,0	8,9,12	0,0,1
A3SS2190	ENSG00000149809.14_3	TM7SF2	chr11	+	64880691	64880886	64880840	64880886	64879986	64880183	-0.05	1	1	1.0,0.667,1.0	1.0,1.0,0.818	298	149	7,4,9	0,1,0	5,3,9	0,0,1
A3SS2192	ENSG00000163577.7_2	EIF5A2	chr3	-	170612080	170612212	170612080	170612172	170624777	170624882	-0.044	0.379917	1	0.974,0.92,0.973	1.0,1.0,1.0	189	149	47,29,45	1,2,1	47,24,48	0,0,0
A3SS2193	ENSG00000113593.11_2	PPWD1	chr5	+	64865458	64865559	64865463	64865559	64863339	64863442	0.018	0.883096	1	1.0,1.0,1.0	0.98,1.0,0.967	154	149	66,30,52	0,0,0	101,57,61	2,0,2
A3SS2194	ENSG00000113593.11_2	PPWD1	chr5	+	64875250	64875440	64875311	64875440	64872705	64872896	0.003	1	1	1.0,1.0,1.0	0.991,1.0,1.0	210	149	108,53,103	0,0,0	148,126,124	1,0,0
A3SS2195	ENSG00000147533.16_2	GOLGA7	chr8	+	41364572	41364640	41364577	41364640	41363429	41363531	-0.016	0.517166	1	0.161,0.162,0.239	0.226,0.179,0.204	154	149	37,29,51	187,145,157	58,34,37	192,151,140
A3SS2196	ENSG00000050426.15_4	LETMD1	chr12	+	51445870	51445990	51445874	51445990	51442816	51442968	0.051	0.208168	0.758975	0.105,0.092,0.051	0.058,0.009,0.029	153	149	3,3,2	25,29,36	7,1,4	111,107,130
A3SS2197	ENSG00000050426.15_4	LETMD1	chr12	+	51447560	51447643	51447594	51447643	51442816	51442968	-0.23	0.30931	0.961686	0.352,0.289,1.0	0.782,0.817,0.731	183	149	4,2,9	6,4,0	66,44,60	15,8,18
A3SS2198	ENSG00000050426.15_4	LETMD1	chr12	+	51449617	51449804	51449769	51449804	51442816	51442968	-0.074	0.791726	1	0.904,0.798,0.908	0.95,0.905,0.978	301	149	19,16,20	1,2,1	116,96,183	3,5,2
A3SS2199	ENSG00000050426.15_4	LETMD1	chr12	+	51449926	51450028	51449932	51450028	51442816	51442968	0.022	1	1	1.0,NA,NA	0.935,1.0,1.0	155	149	2,0,0	0,0,0	15,5,3	1,0,0
A3SS2200	ENSG00000050426.15_4	LETMD1	chr12	+	51449926	51450028	51449932	51450028	51447560	51447643	0.057	1	1	1.0,NA,1.0	1.0,0.828,1.0	155	149	2,0,1	0,0,0	11,5,3	0,1,0
A3SS2201	ENSG00000050426.15_4	LETMD1	chr12	+	51451788	51451911	51451814	51451911	51450132	51450285	-0.003	0.285795	0.915931	0.018,0.0,0.041	0.035,0.015,0.018	175	149	2,0,4	91,77,80	14,5,6	330,280,274
A3SS2202	ENSG00000128654.13_2	MTX2	chr2	+	177194028	177194154	177194097	177194154	177193601	177193640	-0.006	1	1	0.99,1.0,0.981	1.0,0.99,1.0	218	149	139,129,148	1,0,2	164,151,167	0,1,0
A3SS2203	ENSG00000111665.11_2	CDCA3	chr12	-	6958486	6958593	6958486	6958577	6958728	6959022	0.025	0.371095	1	0.913,0.955,0.916	0.847,0.913,0.948	165	149	116,95,109	10,4,9	92,105,141	15,9,7
A3SS2204	ENSG00000111665.11_2	CDCA3	chr12	-	6958728	6959022	6958728	6958947	6959630	6959760	-0.063	0.00201235	0.0294401	0.906,0.887,0.903	0.945,0.952,0.989	224	149	131,106,98	9,9,7	128,119,139	5,4,1
A3SS2205	ENSG00000047579.19_2	DTNBP1	chr6	-	15651543	15651639	15651543	15651594	15652317	15652371	-0.005	0.494176	1	0.0,0.0,0.034	0.05,0.0,0.0	194	149	0,0,2	43,35,44	4,0,0	58,39,26
A3SS2206	ENSG00000125731.12_3	SH2D3A	chr19	-	6754062	6754436	6754062	6754174	6754626	6754742	-0.07	0.00384177	0.0476584	0.895,0.831,1.0	1.0,1.0,0.935	411	149	47,68,26	2,5,0	28,38,40	0,0,1
A3SS2207	ENSG00000125731.12_3	SH2D3A	chr19	-	6754841	6755326	6754841	6754943	6759604	6759681	-0.099	0.0616855	0.345299	0.708,0.778,0.697	0.821,0.852,0.806	532	149	95,75,74	11,6,9	131,103,104	8,5,7
A3SS2211	ENSG00000092847.11_3	AGO1	chr1	+	36359192	36359411	36359274	36359411	36358697	36358879	-0.058	0.27713	0.903679	0.0,0.0,0.177	0.0,0.0,0.35	231	149	0,0,3	11,5,9	0,0,5	14,3,6
A3SS2212	ENSG00000131408.13_4	NR1H2	chr19	+	50880809	50880905	50880843	50880905	50879975	50880083	-0.001	1	1	0.0,0.0,0.021	0.01,0.0,0.013	183	149	0,0,2	124,90,75	1,0,2	79,77,120
A3SS2213	ENSG00000131408.13_4	NR1H2	chr19	+	50882258	50882438	50882348	50882438	50881778	50882053	-0.027	0.472003	1	1.0,1.0,0.89	1.0,0.983,0.989	239	149	97,131,78	0,0,6	72,92,150	0,1,1
A3SS2214	ENSG00000131408.13_4	NR1H2	chr19	+	50882258	50882438	50882390	50882438	50881778	50882053	0.022	0.371782	1	1.0,0.952,0.877	0.9,0.914,0.949	281	149	119,149,94	0,4,7	85,120,174	5,6,5
A3SS2215	ENSG00000131408.13_4	NR1H2	chr19	+	50882348	50882438	50882390	50882438	50881778	50882053	0.077	0.398553	1	1.0,0.778,0.71	0.67,0.79,0.796	191	149	22,18,22	0,4,7	13,29,25	5,6,5
A3SS2216	ENSG00000122008.15_3	POLK	chr5	+	74889702	74889874	74889790	74889874	74886168	74886265	-0.018	1	1	0.943,0.942,0.968	1.0,0.97,0.938	237	149	53,26,48	2,1,1	62,52,48	0,1,2
A3SS2218	ENSG00000135870.11_3	RC3H1	chr1	-	173912579	173912753	173912579	173912726	173915613	173915746	-0.038	0.627952	1	0.783,0.504,0.935	0.871,0.629,0.836	176	149	17,6,17	4,5,1	8,6,6	1,3,1
A3SS2219	ENSG00000100253.12_2	MIOX	chr22	+	50926671	50926771	50926703	50926771	50926314	50926477	0.5	1	1	1.0,1.0,1.0	1.0,0.0,NA	181	149	2,2,1	0,0,0	1,0,0	0,1,0
A3SS2221	ENSG00000135597.18_3	REPS1	chr6	-	139238691	139238764	139238691	139238761	139241351	139241453	0.005	0.972996	1	0.815,0.772,0.797	0.892,0.656,0.821	152	149	54,45,36	12,13,9	76,33,42	9,17,9
A3SS2222	ENSG00000135597.18_3	REPS1	chr6	-	139238691	139238783	139238691	139238761	139241351	139241453	-0.06	0.0453494	0.275633	0.0,0.0,0.088	0.088,0.093,0.088	171	149	0,0,1	12,13,9	1,2,1	9,17,9
A3SS2223	ENSG00000135597.18_3	REPS1	chr6	-	139238691	139238783	139238691	139238764	139241351	139241453	0.001	1	1	0.0,0.0,0.024	0.0,0.0,0.021	168	149	0,0,1	54,45,36	0,0,1	75,31,42
A3SS2225	ENSG00000118363.11_4	SPCS2	chr11	+	74680655	74680744	74680684	74680744	74676078	74676162	-0.104	1.22125e-15	4.13163e-13	0.875,0.874,0.838	0.956,0.976,0.966	178	149	433,349,352	52,42,57	438,383,406	17,8,12
A3SS2226	ENSG00000197841.14_3	ZNF181	chr19	+	35230427	35230526	35230430	35230526	35230052	35230173	-0.082	0.21107	0.763719	0.543,0.479,0.558	0.622,0.601,0.602	152	149	23,15,18	19,16,14	37,20,34	22,13,22
A3SS2231	ENSG00000241316.6_3	SUCLG2-AS1	chr3	+	67721252	67721428	67721305	67721428	67720239	67720333	0.142	1	1	0.425,NA,NA	0.269,0.425,0.156	202	149	2,0,0	2,0,0	1,2,2	2,2,8
A3SS2233	ENSG00000135968.20_3	GCC2	chr2	+	109098152	109098272	109098165	109098272	109092207	109092306	-0.001	1	1	1.0,0.989,1.0	0.992,1.0,1.0	162	149	239,95,247	0,1,0	282,229,288	2,0,0
A3SS2234	ENSG00000135968.20_3	GCC2	chr2	+	109102890	109103104	109102966	109103104	109102286	109102364	0.006	1	1	0.004,0.018,0.015	0.007,0.0,0.011	225	149	1,2,3	147,71,134	2,0,3	197,165,177
A3SS2238	ENSG00000100526.19_3	CDKN3	chr14	+	54884565	54884669	54884568	54884669	54878201	54878424	-0.031	1	1	0.907,1.0,1.0	1.0,1.0,1.0	152	149	10,6,4	1,0,0	7,6,6	0,0,0
A3SS2239	ENSG00000100526.19_3	CDKN3	chr14	+	54884565	54884669	54884568	54884669	54882616	54882648	-0.016	0.164737	0.658585	0.97,0.937,0.993	0.991,0.987,0.971	152	149	130,91,147	4,6,1	220,159,136	2,2,4
A3SS2240	ENSG00000114956.19_2	DGUOK	chr2	+	74177711	74177859	74177727	74177859	74173845	74174033	0.007	1	1	1.0,1.0,1.0	0.98,1.0,1.0	165	149	140,113,108	0,0,0	109,92,125	2,0,0
A3SS2241	ENSG00000114956.19_2	DGUOK	chr2	+	74177711	74177859	74177753	74177859	74173845	74174033	-0.003	1	1	1.0,0.99,1.0	1.0,1.0,1.0	191	149	155,131,117	0,1,0	125,100,139	0,0,0
A3SS2242	ENSG00000114956.19_2	DGUOK	chr2	+	74177727	74177859	74177753	74177859	74173845	74174033	-0.02	1	1	1.0,0.939,1.0	1.0,1.0,1.0	175	149	15,18,9	0,1,0	18,8,14	0,0,0
A3SS2243	ENSG00000114378.16_2	HYAL1	chr3	-	50339487	50340054	50339487	50339636	50340896	50341004	0.023	1	1	1.0,1.0,1.0	0.965,0.967,1.0	567	149	96,82,59	0,0,0	105,112,87	1,1,0
A3SS2244	ENSG00000114378.16_2	HYAL1	chr3	-	50339487	50340411	50339487	50339636	50340896	50341004	0.021	1	1	1.0,1.0,1.0	0.965,0.971,1.0	924	149	170,151,110	0,0,0	172,206,178	1,1,0
A3SS2245	ENSG00000114378.16_2	HYAL1	chr3	-	50339487	50340411	50339487	50340054	50340896	50341004	-0.048	0.0757666	0.398954	0.883,0.876,1.0	1.0,1.0,0.902	506	149	77,72,51	3,3,0	67,94,94	0,0,3
A3SS2246	ENSG00000110921.13_3	MVK	chr12	+	110028487	110028666	110028575	110028666	110024558	110024604	0.012	0.621728	1	0.013,0.007,0.031	0.0,0.0,0.014	237	149	2,1,4	94,86,79	0,0,1	38,28,45
A3SS2247	ENSG00000241852.9_3	C8orf58	chr8	+	22460049	22460156	22460073	22460156	22459712	22459825	0.011	0.984512	1	0.633,0.513,0.575	0.496,0.401,0.791	173	149	14,11,11	7,9,7	16,7,22	14,9,5
A3SS2248	ENSG00000106009.15_2	BRAT1	chr7	-	2579419	2580686	2579419	2579522	2580931	2581118	-0.282	2.47229e-06	0.00012625	0.75,0.764,0.641	1.0,1.0,1.0	1313	149	53,57,63	2,2,4	72,52,68	0,0,0
A3SS2249	ENSG00000133641.17_2	C12orf29	chr12	+	88437375	88439556	88439358	88439556	88436601	88436697	-0.017	1	1	0.948,1.0,1.0	1.0,1.0,1.0	2132	149	260,190,217	1,0,0	314,261,270	0,0,0
A3SS2251	ENSG00000178467.17_3	P4HTM	chr3	+	49042293	49043300	49043209	49043300	49041530	49041693	-0.048	1	1	0.855,1.0,1.0	1.0,1.0,1.0	1065	149	84,60,66	2,0,0	157,144,157	0,0,0
A3SS2252	ENSG00000137133.10_2	HINT2	chr9	-	35813262	35813364	35813262	35813335	35813441	35813546	0	1	1	0.0,0.028,0.0	0.0,0.0,0.028	178	149	0,2,0	53,58,38	0,0,2	56,62,59
A3SS2253	ENSG00000137133.10_2	HINT2	chr9	-	35813441	35813546	35813441	35813516	35813640	35813781	-0.007	1	1	1.0,0.974,0.946	0.98,1.0,0.961	179	149	52,45,42	0,1,2	59,54,59	1,0,2
A3SS2254	ENSG00000176472.10_2	ZNF575	chr19	+	44038488	44038653	44038557	44038653	44037946	44038054	0.287	0.466306	1	1.0,1.0,1.0	1.0,0.406,0.732	218	149	4,3,3	0,0,0	8,2,4	0,2,1
A3SS2255	ENSG00000173559.12_2	NABP1	chr2	+	192548015	192548530	192548454	192548530	192546671	192546743	-0.054	3.29045e-11	5.08891e-09	0.017,0.011,0.019	0.082,0.062,0.064	588	149	10,4,8	145,90,104	45,35,27	128,135,100
A3SS2256	ENSG00000173559.12_2	NABP1	chr2	+	192548015	192548530	192548454	192548530	192547217	192547321	-0.161	0.548352	1	0.717,0.202,0.67	0.851,0.747,0.474	588	149	10,2,8	1,2,1	45,35,32	2,3,9
A3SS2257	ENSG00000177479.19_2	ARIH2	chr3	+	48982414	48982614	48982568	48982614	48960180	48960244	0.504	1	1	1.0,1.0,NA	NA,0.496,0.496	303	149	1,5,0	0,0,0	0,2,2	0,1,1
A3SS2258	ENSG00000129197.14_2	RPAIN	chr17	+	5329290	5329619	5329555	5329619	5326088	5326149	-0.147	0.00320678	0.041504	0.319,0.37,0.48	0.516,0.558,0.537	414	149	52,49,59	40,30,23	154,137,158	52,39,49
A3SS2259	ENSG00000129197.14_2	RPAIN	chr17	+	5329290	5331531	5331390	5331531	5326088	5326149	-0.548	0	0	0.156,0.132,0.181	0.672,0.653,0.788	2249	149	78,53,90	28,23,27	216,199,224	7,7,4
A3SS2260	ENSG00000051128.18_3	HOMER3	chr19	-	19040011	19040443	19040011	19040434	19042133	19042220	-0.008	0.474379	1	0.982,0.979,0.986	0.985,1.0,0.987	158	149	282,202,221	5,4,3	211,176,167	3,0,2
A3SS2262	ENSG00000227124.8_3	ZNF717	chr3	-	75790760	75791016	75790760	75790887	75832456	75832515	-0.018	0.111823	0.511653	0.152,0.118,0.097	0.183,0.0,0.238	278	149	1,1,1	3,4,5	5,0,7	12,5,12
A3SS2263	ENSG00000130779.19_3	CLIP1	chr12	-	122758584	122758709	122758584	122758690	122762700	122762750	0.002	1	1	1.0,1.0,0.987	1.0,0.986,0.996	168	149	200,121,169	0,0,2	277,239,286	0,3,1
A3SS2264	ENSG00000130779.19_3	CLIP1	chr12	-	122758584	122758709	122758584	122758690	122763338	122763489	0.027	1	1	1.0,1.0,1.0	0.92,1.0,1.0	168	149	20,8,14	0,0,0	13,13,17	1,0,0
A3SS2265	ENSG00000117984.13_3	CTSD	chr11	-	1774017	1774900	1774017	1774891	1775032	1775131	0.007	0.905664	1	0.992,0.996,0.994	0.984,0.981,0.996	158	149	992,815,653	8,3,4	334,378,482	5,7,2
A3SS2266	ENSG00000117984.13_3	CTSD	chr11	-	1775032	1775131	1775032	1775110	1775223	1775368	-0.004	1	1	0.993,0.999,0.992	1.0,0.997,1.0	170	149	1148,927,735	7,1,5	562,668,619	0,2,0
A3SS2267	ENSG00000117984.13_3	CTSD	chr11	-	1780745	1780869	1780745	1780863	1782538	1782698	-0.001	1	1	0.995,0.998,0.999	1.0,0.997,0.998	155	149	1065,959,802	5,2,1	551,593,601	0,2,1
A3SS2270	ENSG00000170949.17_3	ZNF160	chr19	-	53594665	53594806	53594665	53594782	53594889	53594973	-0.277	0.026283	0.191738	0.223,0.301,0.463	0.463,0.721,0.633	173	149	3,1,1	9,2,1	2,3,2	2,1,1
A3SS2271	ENSG00000100241.20_3	SBF1	chr22	-	50892940	50893171	50892940	50893135	50893242	50893373	-0.014	1	1	1.0,0.978,0.98	1.0,1.0,1.0	185	149	143,110,120	0,2,2	80,53,83	0,0,0
A3SS2272	ENSG00000100241.20_3	SBF1	chr22	-	50905960	50906122	50905960	50906119	50906214	50906352	0.034	0.529679	1	0.183,0.193,0.227	0.311,0.056,0.133	152	149	13,9,15	57,37,50	17,2,5	37,33,32
A3SS2275	ENSG00000171853.15_3	TRAPPC12	chr2	+	3481462	3481566	3481465	3481566	3469367	3469466	-0.012	1	1	0.036,0.041,0.0	0.023,0.065,0.024	152	149	1,1,0	26,23,31	1,3,1	42,42,40
A3SS2276	ENSG00000137822.12_2	TUBGCP4	chr15	+	43668652	43668823	43668700	43668823	43668295	43668424	-0.001	1	1	0.0,0.086,0.032	0.121,0.0,0.0	197	149	0,1,1	21,8,23	2,0,0	11,18,16
A3SS2277	ENSG00000137822.12_2	TUBGCP4	chr15	+	43690235	43690377	43690238	43690377	43689411	43689519	0.14	0.0813498	0.4155	0.305,0.551,0.427	0.382,0.301,0.181	152	149	17,20,19	38,16,25	12,11,7	19,25,31
A3SS2278	ENSG00000116514.16_2	RNF19B	chr1	-	33413822	33413967	33413822	33413964	33415169	33415375	-0.009	0.760819	1	0.308,0.229,0.244	0.222,0.284,0.301	152	149	54,34,33	119,112,100	25,49,50	86,121,114
A3SS2279	ENSG00000116514.16_2	RNF19B	chr1	-	33413822	33413967	33413822	33413964	33429651	33430286	-0.333	1	1	1.0,0.0,1.0	1.0,NA,NA	152	149	1,0,1	0,1,0	1,0,0	0,0,0
A3SS2280	ENSG00000170485.16_3	NPAS2	chr2	+	101611861	101612517	101612257	101612517	101609808	101609989	0.06	0.0894313	0.441689	0.515,0.434,0.5	0.417,0.382,0.469	545	149	283,168,307	73,60,84	115,131,155	44,58,48
A3SS2282	ENSG00000055163.19_3	CYFIP2	chr5	+	156731245	156731374	156731257	156731374	156729801	156729898	0.018	1	1	1.0,1.0,1.0	0.946,1.0,1.0	161	149	30,18,23	0,0,0	19,18,18	1,0,0
A3SS2287	ENSG00000198791.11_2	CNOT7	chr8	-	17100950	17101131	17100950	17101054	17102544	17102756	-0.251	0.492358	1	0.248,1.0,1.0	1.0,1.0,1.0	226	149	1,3,2	2,0,0	1,5,2	0,0,0
A3SS2288	ENSG00000121073.13_2	SLC35B1	chr17	-	47783565	47783696	47783565	47783671	47784326	47784430	0.195	3.64182e-06	0.000174651	0.656,0.612,0.676	0.4,0.502,0.456	174	149	116,92,100	52,50,41	56,40,49	72,34,50
A3SS2289	ENSG00000042286.14_2	AIFM2	chr10	-	71883662	71883856	71883662	71883853	71892489	71892690	0.028	0.450355	1	0.217,0.176,0.253	0.274,0.111,0.177	152	149	28,22,28	99,101,81	25,9,21	65,71,96
A3SS2291	ENSG00000166333.13_3	ILK	chr11	+	6625409	6625590	6625455	6625590	6624960	6625052	0.138	1.29676e-08	1.29988e-06	0.772,0.781,0.762	0.625,0.616,0.66	195	149	758,582,540	171,125,129	246,252,290	113,120,114
A3SS2297	ENSG00000168872.16_3	DDX19A	chr16	+	70399835	70400165	70399987	70400165	70398919	70399034	0.001	1	1	0.011,0.0,0.006	0.0,0.01,0.005	301	149	2,0,1	87,62,82	0,2,1	98,101,97
A3SS2298	ENSG00000137411.16_3	VARS2	chr6	+	30887865	30887993	30887871	30887993	30887534	30887625	-0.026	0.448041	1	0.965,1.0,0.958	1.0,1.0,1.0	155	149	57,50,47	2,0,2	23,11,17	0,0,0
A3SS2300	ENSG00000159023.19_3	EPB41	chr1	+	29313942	29314417	29313959	29314417	29213635	29213722	-0.023	1	1	0.0,0.0,0.0	0.027,0.017,0.026	166	149	0,0,0	48,55,51	1,1,1	32,52,33
A3SS2301	ENSG00000159023.19_3	EPB41	chr1	+	29379615	29379824	29379618	29379824	29365765	29365938	0.076	0.0182351	0.148654	0.836,0.941,0.896	0.782,0.81,0.852	152	149	57,65,53	11,4,6	77,61,53	21,14,9
A3SS2303	ENSG00000185917.13_3	SETD4	chr21	-	37431113	37431271	37431113	37431222	37432579	37432611	-0.085	0.312313	0.966028	0.301,0.317,0.19	0.429,0.458,0.177	198	149	8,8,5	14,13,16	9,9,2	9,8,7
A3SS2304	ENSG00000185917.13_3	SETD4	chr21	-	37431113	37431271	37431113	37431222	37432644	37432824	0.207	0.00176065	0.0269815	0.429,0.317,0.286	0.193,0.131,0.086	198	149	10,8,8	10,13,15	13,5,5	41,25,40
A3SS2305	ENSG00000104763.18_3	ASAH1	chr8	-	17918885	17918967	17918885	17918958	17919194	17919249	0.002	1	1	1.0,1.0,1.0	1.0,0.993,1.0	158	149	280,205,199	0,0,0	236,158,190	0,1,0
A3SS2315	ENSG00000104763.18_3	ASAH1	chr8	-	17928808	17928920	17928808	17928899	17933049	17933096	0.001	1	1	0.004,0.0,0.0	0.0,0.0,0.0	170	149	1,0,0	216,201,193	0,0,0	154,173,153
A3SS2317	ENSG00000112742.9_2	TTK	chr6	+	80736094	80736231	80736097	80736231	80732040	80732189	-0.027	0.395133	1	0.86,0.779,0.885	0.926,0.823,0.856	152	149	157,72,134	25,20,17	89,57,91	7,12,15
A3SS2318	ENSG00000157992.12_2	KRTCAP3	chr2	+	27667052	27667164	27667055	27667164	27666815	27666928	-0.662	1	1	NA,0.0,NA	NA,0.662,NA	152	149	0,0,0	0,2,0	0,4,0	0,2,0
A3SS2327	ENSG00000272752.6_3	STAG3L5P-PVRIG2P-PILRB	chr7	+	99947353	99947510	99947421	99947510	99936395	99936512	0.075	0.734159	1	1.0,1.0,1.0	0.774,1.0,1.0	217	149	6,6,4	0,0,0	15,11,20	3,0,0
A3SS2328	ENSG00000272752.6_3	STAG3L5P-PVRIG2P-PILRB	chr7	+	99947353	99947510	99947421	99947510	99943487	99943591	0.085	0.0411507	0.25901	0.94,1.0,0.716	0.797,0.774,0.831	217	149	23,11,11	1,0,3	40,30,43	7,6,6
A3SS2329	ENSG00000272752.6_3	STAG3L5P-PVRIG2P-PILRB	chr7	+	99949785	99950101	99949884	99950101	99948874	99949033	0.004	0.80946	1	0.695,0.706,0.834	0.801,0.688,0.733	248	149	19,16,25	5,4,3	47,33,32	7,9,7
A3SS2330	ENSG00000164062.12_3	APEH	chr3	+	49713488	49713948	49713810	49713948	49713323	49713399	-0.064	0.0286336	0.200769	0.978,0.952,0.742	1.0,0.949,0.915	471	149	141,126,109	1,2,12	202,177,171	0,3,5
A3SS2331	ENSG00000164062.12_3	APEH	chr3	+	49720260	49720378	49720275	49720378	49719978	49720169	-0.003	1	1	0.0,0.0,0.0	0.0,0.01,0.0	164	149	0,0,0	104,99,97	0,1,0	82,88,122
A3SS2332	ENSG00000230850.3	RP11-782C8.1	chr1	+	143231278	143231561	143231293	143231561	143119060	143119119	0.048	0.107778	0.49949	0.377,1.0,0.0	1.0,0.232,0.0	164	149	2,2,0	3,0,4	1,1,0	0,3,3
A3SS2334	ENSG00000141314.12_3	RHBDL3	chr17	+	30621312	30621461	30621363	30621461	30615810	30616035	-0.157	0.831655	1	1.0,1.0,0.528	1.0,1.0,1.0	200	149	12,2,3	0,0,2	6,2,1	0,0,0
A3SS2335	ENSG00000169891.17_2	REPS2	chrX	+	17043181	17043308	17043184	17043308	17040245	17040394	0.082	0.228833	0.804335	0.44,0.357,0.431	0.14,0.359,0.484	152	149	32,13,27	40,23,35	6,12,23	36,21,24
A3SS2336	ENSG00000069869.15_2	NEDD4	chr15	-	56155110	56155277	56155110	56155229	56161776	56161879	0.007	1	1	1.0,1.0,1.0	1.0,1.0,0.978	197	149	133,78,89	0,0,0	123,104,119	0,0,2
A3SS2337	ENSG00000086848.14_3	ALG9	chr11	-	111708971	111709122	111708971	111709101	111711377	111711532	-0.017	0.780683	1	0.305,0.235,0.174	0.283,0.276,0.206	170	149	16,7,6	32,20,25	18,10,8	40,23,27
A3SS2338	ENSG00000086848.14_3	ALG9	chr11	-	111708971	111709122	111708971	111709101	111715323	111715446	0.121	1	1	1.0,1.0,1.0	1.0,1.0,0.637	170	149	2,2,1	0,0,0	5,1,2	0,0,1
A3SS2339	ENSG00000117682.16_2	DHDDS	chr1	+	26769198	26769364	26769221	26769364	26764658	26764775	0.007	0.907659	1	0.069,0.064,0.119	0.061,0.084,0.085	172	149	5,3,7	58,38,45	5,7,7	67,66,65
A3SS2340	ENSG00000117682.16_2	DHDDS	chr1	+	26795382	26797785	26795385	26797785	26786527	26786635	0.036	0.55342	1	0.129,0.274,0.206	0.074,0.279,0.147	152	149	5,10,9	33,26,34	3,13,6	37,33,34
A3SS2342	ENSG00000030582.17_3	GRN	chr17	+	42426992	42427119	42427034	42427119	42426793	42426919	0.001	1	1	0.0,0.0,0.003	0.0,0.0,0.0	191	149	0,0,1	312,254,238	0,0,0	225,321,268
A3SS2343	ENSG00000030582.17_3	GRN	chr17	+	42427809	42427945	42427829	42427945	42427595	42427708	-0.001	1	1	0.997,1.0,1.0	1.0,1.0,1.0	169	149	436,345,322	1,0,0	250,367,309	0,0,0
A3SS2344	ENSG00000030582.17_3	GRN	chr17	+	42430028	42430470	42430083	42430470	42429708	42429939	0.002	0.941016	1	0.966,0.939,0.951	0.956,0.945,0.949	204	149	345,296,240	9,14,9	238,210,231	8,9,9
A3SS2345	ENSG00000167595.14_3	PROSER3	chr19	+	36253153	36253257	36253156	36253257	36252919	36253047	-0.083	0.733492	1	0.887,0.296,0.746	0.797,0.797,0.583	152	149	16,3,9	2,7,3	24,12,10	6,3,7
A3SS2346	ENSG00000167595.14_3	PROSER3	chr19	+	36255934	36256077	36255967	36256077	36255754	36255837	0.089	0.00843356	0.0845386	0.831,1.0,1.0	1.0,0.643,0.92	182	149	6,9,6	1,0,0	11,11,14	0,5,1
A3SS2349	ENSG00000174151.14_4	CYB561D1	chr1	+	110038300	110041477	110038377	110041477	110037764	110037802	-0.034	0.601393	1	0.052,0.107,0.18	0.248,0.086,0.107	226	149	1,2,2	12,11,6	3,1,2	6,7,11
A3SS2351	ENSG00000169519.20_3	METTL15	chr11	+	28318299	28318478	28318343	28318478	28232608	28232745	0.166	0.00281408	0.0376382	1.0,1.0,1.0	0.68,0.822,1.0	193	149	10,8,11	0,0,0	11,12,10	4,2,0
A3SS2352	ENSG00000169519.20_3	METTL15	chr11	+	28318299	28318478	28318343	28318478	28311752	28311944	0.103	0.032578	0.220641	0.881,0.943,0.848	0.973,0.732,0.659	193	149	48,43,29	5,2,4	46,46,50	1,13,20
A3SS2354	ENSG00000073910.20_4	FRY	chr13	+	32841306	32841496	32841379	32841496	32839586	32839753	0.186	1	1	1.0,1.0,1.0	1.0,0.627,NA	222	149	2,7,6	0,0,0	7,5,0	0,2,0
A3SS2355	ENSG00000198056.13_4	PRIM1	chr12	-	57140564	57140816	57140564	57140638	57144821	57144979	-0.015	1	1	1.0,1.0,0.954	1.0,1.0,1.0	327	149	131,77,92	0,0,2	406,245,317	0,0,0
A3SS2356	ENSG00000144713.12_2	RPL32	chr3	-	12880847	12881083	12880847	12881029	12881640	12881741	0	1	1	0.0,0.0,0.0	0.0,0.0,0.0	203	149	0,0,1	6403,6110,5128	1,2,0	6461,6958,7742
A3SS2357	ENSG00000106628.10_3	POLD2	chr7	-	44154893	44154995	44154893	44154953	44155364	44155492	0	1	1	0.988,0.995,0.995	0.99,0.998,0.99	191	149	315,282,232	3,1,1	520,558,517	4,1,4
A3SS2358	ENSG00000106628.10_3	POLD2	chr7	-	44155713	44155871	44155713	44155808	44156028	44156109	0.002	0.453501	1	0.974,1.0,0.975	0.991,0.967,0.985	212	149	264,255,164	5,0,3	470,455,467	3,11,5
A3SS2361	ENSG00000105255.10_2	FSD1	chr19	+	4318342	4318502	4318380	4318502	4317178	4317277	-0.024	0.0206405	0.161689	0.946,0.965,0.939	1.0,0.946,0.976	187	149	133,140,116	6,4,6	48,44,51	0,2,1
A3SS2362	ENSG00000131650.13_2	KREMEN2	chr16	+	3016642	3016796	3016759	3016796	3016325	3016450	-0.025	0.0353693	0.234051	0.958,0.849,0.902	1.0,1.0,0.785	266	149	41,40,33	1,4,2	22,6,13	0,0,2
A3SS2363	ENSG00000140995.16_3	DEF8	chr16	+	90015824	90015921	90015827	90015921	90015162	90015222	0.084	0.850079	1	0.595,0.412,0.746	0.14,0.595,0.766	152	149	6,5,3	4,7,1	1,3,10	6,2,3
A3SS2366	ENSG00000140995.16_3	DEF8	chr16	+	90023880	90024068	90023918	90024068	90021576	90021674	0.048	0.000510505	0.0105472	0.093,0.09,0.07	0.018,0.059,0.031	187	149	25,23,15	194,186,159	2,5,3	87,64,75
A3SS2368	ENSG00000140995.16_3	DEF8	chr16	+	90023880	90024068	90023948	90024068	90021576	90021674	-0.055	0.00156281	0.0250281	0.982,0.872,0.981	1.0,1.0,1.0	217	149	79,89,74	1,9,1	26,31,15	0,0,0
A3SS2370	ENSG00000140995.16_3	DEF8	chr16	+	90023918	90024068	90023948	90024068	90021576	90021674	-0.017	0.530887	1	0.995,0.959,0.995	1.0,1.0,1.0	179	149	248,252,218	1,9,1	111,90,87	0,0,0
A3SS2372	ENSG00000140995.16_3	DEF8	chr16	+	90030577	90030718	90030628	90030718	90029770	90029851	-0.076	0.642492	1	0.554,1.0,0.651	1.0,0.635,0.799	200	149	5,4,5	3,0,2	7,7,16	0,3,3
A3SS2374	ENSG00000188010.12_3	MORN2	chr2	+	39107722	39107847	39107740	39107847	39107319	39107370	0.004	1	1	0.013,0.015,0.0	0.013,0.0,0.004	167	149	3,3,0	202,175,173	4,0,1	274,209,250
A3SS2377	ENSG00000099804.8_2	CDC34	chr19	+	541338	542092	541342	542092	537012	537147	-0.009	0.296203	0.940759	0.95,0.968,0.951	0.973,0.96,0.964	153	149	413,314,298	21,10,15	259,293,327	7,12,12
A3SS2381	ENSG00000005189.19_3	REXO5	chr16	+	20826248	20826375	20826306	20826375	20824511	20824624	-0.142	0.798892	1	1.0,0.0,1.0	0.683,1.0,0.742	207	149	1,0,1	0,1,0	3,1,8	1,0,2
A3SS2385	ENSG00000178802.17_3	MPI	chr15	+	75182778	75182995	75182867	75182995	75182382	75182430	0.156	0.0392484	0.252748	0.294,0.0,0.212	0.038,0.0,0.0	238	149	2,0,3	3,8,7	1,0,0	16,13,15
A3SS2388	ENSG00000178802.17_3	MPI	chr15	+	75183719	75183920	75183755	75183920	75182867	75182995	-0.028	1	1	0.916,1.0,1.0	1.0,1.0,1.0	185	149	27,28,15	2,0,0	51,33,24	0,0,0
A3SS2389	ENSG00000119777.18_3	TMEM214	chr2	+	27260657	27260760	27260682	27260760	27260428	27260570	-0.052	0.218157	0.781081	0.222,0.0,0.222	0.0,0.3,0.3	174	149	2,0,1	6,2,3	0,3,2	1,6,4
A3SS2395	ENSG00000108666.9_4	C17orf75	chr17	-	30666831	30666957	30666831	30666943	30668222	30668303	0.027	0.387435	1	0.878,0.802,0.908	0.779,0.929,0.8	163	149	63,31,65	8,7,6	58,86,57	15,6,13
A3SS2396	ENSG00000108666.9_4	C17orf75	chr17	-	30666831	30666981	30666831	30666943	30668222	30668303	-0.107	0.109084	0.502958	0.0,0.0,0.0	0.096,0.117,0.109	187	149	0,0,0	8,7,6	2,1,2	15,6,13
A3SS2397	ENSG00000108666.9_4	C17orf75	chr17	-	30666831	30666981	30666831	30666957	30668222	30668303	-0.01	1	1	0.0,0.0,0.0	0.015,0.0,0.015	173	149	0,0,0	63,31,65	1,0,1	57,85,56
A3SS2398	ENSG00000102178.12_2	UBL4A	chrX	-	153714109	153714422	153714109	153714318	153714566	153714672	0.022	0.0273717	0.195724	0.017,0.031,0.06	0.0,0.034,0.007	253	149	3,4,10	101,73,92	0,7,1	93,116,84
A3SS2401	ENSG00000214078.12_3	CPNE1	chr20	-	34214488	34214748	34214488	34214725	34215201	34215335	0.008	0.117734	0.526587	0.023,0.019,0.017	0.021,0.008,0.005	172	149	9,7,5	330,316,246	10,3,2	413,335,338
A3SS2402	ENSG00000214078.12_3	CPNE1	chr20	-	34220084	34220170	34220084	34220156	34220232	34220307	-0.001	1	1	0.0,0.0,0.0	0.002,0.0,0.002	163	149	0,0,0	288,223,219	1,0,1	535,470,469
A3SS2403	ENSG00000214078.12_3	CPNE1	chr20	-	34246851	34246936	34246851	34246904	34252681	34252822	-0.028	0.214952	0.775688	0.812,0.926,0.843	0.85,0.887,0.928	181	149	110,107,78	21,7,12	69,76,126	10,8,8
A3SS2404	ENSG00000241322.4	CDRT1	chr17	-	15498061	15498204	15498061	15498140	15499827	15499976	-0.163	0.804741	1	1.0,1.0,0.512	1.0,1.0,1.0	213	149	5,1,3	0,0,2	4,9,2	0,0,0
A3SS2409	ENSG00000147535.16_3	PLPP5	chr8	-	38125888	38125979	38125888	38125925	38126399	38126508	-0.016	0.356536	1	0.974,0.963,0.946	0.985,0.971,0.974	203	149	104,70,72	2,2,3	87,90,102	1,2,2
A3SS2410	ENSG00000159720.11_3	ATP6V0D1	chr16	-	67472873	67473050	67472873	67472998	67473176	67473254	0.028	0.00209276	0.0298895	0.996,0.995,0.984	0.947,0.955,0.988	201	149	361,276,248	1,1,3	191,173,217	8,6,2
A3SS2411	ENSG00000197223.11_2	C1D	chr2	-	68273119	68273542	68273119	68273175	68274304	68274451	-0.016	1	1	0.952,1.0,1.0	1.0,1.0,1.0	516	149	207,176,127	3,0,0	172,110,146	0,0,0
A3SS2412	ENSG00000105227.14_2	PRX	chr19	-	40899674	40904723	40899674	40903877	40909612	40909769	-0.286	1	1	1.0,0.428,NA	1.0,1.0,1.0	995	149	1,10,0	0,2,0	7,11,8	0,0,0
A3SS2413	ENSG00000183751.14_4	TBL3	chr16	+	2024181	2024293	2024197	2024293	2024056	2024108	-0.023	1	1	0.0,0.0,0.0	0.0,0.0,0.07	165	149	0,0,0	22,35,28	0,0,1	20,13,12
A3SS2414	ENSG00000183751.14_4	TBL3	chr16	+	2028313	2028472	2028315	2028472	2028149	2028221	0.004	1	1	0.97,0.98,0.966	1.0,0.932,0.973	151	149	33,49,29	1,1,1	51,28,36	0,2,1
A3SS2415	ENSG00000174672.15_2	BRSK2	chr11	+	1481729	1482944	1482199	1482944	1480421	1480469	0.202	0.00210433	0.0299757	0.419,0.033,0.419	0.0,0.0,0.265	619	149	6,1,12	2,7,4	0,0,3	7,1,2
A3SS2416	ENSG00000100320.22_3	RBFOX2	chr22	-	36155934	36156079	36155934	36156067	36157248	36157341	-0.103	0.02944	0.205359	0.401,0.362,0.442	0.454,0.498,0.563	161	149	50,35,36	69,57,42	27,30,53	30,28,38
A3SS2417	ENSG00000100320.22_3	RBFOX2	chr22	-	36177646	36177793	36177646	36177790	36205826	36206051	-0.021	0.634754	1	0.308,0.317,0.252	0.285,0.335,0.32	152	149	54,45,34	119,95,99	46,35,47	113,68,98
A3SS2421	ENSG00000214021.15_3	TTLL3	chr3	+	9854626	9854795	9854629	9854795	9852304	9852393	-0.005	0.32272	0.98527	0.746,1.0,0.831	0.746,0.907,0.94	152	149	3,3,5	1,0,1	6,10,16	2,1,1
A3SS2423	ENSG00000214021.15_3	TTLL3	chr3	+	9859328	9860604	9860505	9860604	9854931	9855029	-0.272	0.394164	1	1.0,0.183,1.0	1.0,1.0,1.0	1326	149	16,4,32	0,2,0	41,37,46	0,0,0
A3SS2424	ENSG00000214021.15_3	TTLL3	chr3	+	9860238	9860604	9860505	9860604	9859328	9859443	-0.304	0.0376908	0.246401	0.589,0.152,0.811	0.763,0.7,1.0	416	149	4,1,12	1,2,1	9,13,23	1,2,0
A3SS2430	ENSG00000170906.15_3	NDUFA3	chr19	+	54610070	54610268	54610117	54610268	54609659	54609753	-0.054	0.482644	1	0.132,0.0,0.0	0.0,0.071,0.222	196	149	3,0,0	15,10,12	0,1,3	12,10,8
A3SS2431	ENSG00000164068.15_2	RNF123	chr3	+	49734477	49734655	49734575	49734655	49728857	49728942	0.08	0.00990193	0.0954949	0.07,0.131,0.182	0.036,0.0,0.108	247	149	2,2,7	16,8,19	1,0,3	16,23,15
A3SS2432	ENSG00000164068.15_2	RNF123	chr3	+	49742416	49742619	49742514	49742619	49742082	49742189	0.024	1	1	1.0,1.0,1.0	0.966,1.0,0.961	247	149	48,32,36	0,0,0	47,26,41	1,0,1
A3SS2434	ENSG00000143437.20_2	ARNT	chr1	-	150788734	150788882	150788734	150788876	150789263	150789366	0.011	1	1	1.0,1.0,0.986	0.954,1.0,1.0	155	149	84,46,76	0,0,1	65,88,58	3,0,0
A3SS2435	ENSG00000143437.20_2	ARNT	chr1	-	150802379	150802456	150802379	150802441	150804293	150804379	0.016	0.197339	0.734156	1.0,0.939,0.939	0.954,0.95,0.925	164	149	98,68,68	0,4,4	113,84,82	5,4,6
A3SS2436	ENSG00000143437.20_2	ARNT	chr1	-	150825237	150825316	150825237	150825282	150830824	150830936	0.014	0.495655	1	0.032,0.026,0.012	0.027,0.0,0.0	183	149	2,2,1	50,61,68	3,0,0	89,58,91
A3SS2437	ENSG00000204220.11_3	PFDN6	chr6	+	33257546	33257697	33257551	33257697	33257373	33257405	-0.007	0.829605	1	0.949,0.968,0.909	0.965,0.948,0.935	154	149	115,93,83	6,3,8	113,112,134	4,6,9
A3SS2438	ENSG00000079313.13_3	REXO1	chr19	-	1817217	1817457	1817217	1817328	1817705	1817779	0.074	0.0438096	0.270134	0.118,0.145,0.211	0.015,0.097,0.141	278	149	8,12,12	32,38,24	1,8,11	35,40,36
A3SS2439	ENSG00000079313.13_3	REXO1	chr19	-	1819932	1820179	1819932	1820056	1820262	1820394	0.028	0.0542568	0.313773	0.044,0.099,0.097	0.099,0.056,0.0	272	149	3,8,10	36,40,51	6,4,0	30,37,53
A3SS2442	ENSG00000172725.13_3	CORO1B	chr11	-	67207805	67207955	67207805	67207910	67208595	67208715	-0.005	1	1	0.006,0.0,0.021	0.016,0.013,0.014	194	149	1,0,3	129,110,107	2,2,2	95,115,108
A3SS2445	ENSG00000116871.15_4	MAP7D1	chr1	+	36641799	36642182	36642018	36642182	36640498	36640609	-0.019	0.563311	1	0.991,0.951,1.0	1.0,1.0,1.0	368	149	272,242,206	1,5,0	103,106,139	0,0,0
A3SS2446	ENSG00000116871.15_4	MAP7D1	chr1	+	36644019	36644197	36644046	36644197	36643473	36643802	-0.019	0.513235	1	0.855,0.874,0.848	0.911,0.92,0.804	176	149	139,107,119	20,13,18	109,68,87	9,5,18
A3SS2447	ENSG00000116871.15_4	MAP7D1	chr1	+	36644019	36644197	36644071	36644197	36643473	36643802	-0.027	0.00994996	0.0954949	0.968,0.954,0.962	0.974,1.0,0.991	201	149	203,166,172	5,6,5	205,121,148	4,0,1
A3SS2448	ENSG00000116871.15_4	MAP7D1	chr1	+	36644046	36644197	36644071	36644197	36643473	36643802	-0.057	0.00294155	0.0389669	0.935,0.911,0.924	0.957,1.0,0.985	174	149	84,72,71	5,6,5	105,58,79	4,0,1
A3SS2449	ENSG00000116871.15_4	MAP7D1	chr1	+	36645112	36645158	36645115	36645158	36644862	36644916	0.001	0.931776	1	0.116,0.131,0.116	0.121,0.135,0.105	152	149	46,52,30	343,339,224	32,34,27	227,213,225
A3SS2451	ENSG00000089486.16_3	CDIP1	chr16	-	4562791	4562999	4562791	4562948	4563696	4563852	-0.036	1	1	1.0,0.891,1.0	1.0,1.0,1.0	200	149	18,11,8	0,1,0	12,9,14	0,0,0
A3SS2452	ENSG00000089486.16_3	CDIP1	chr16	-	4562791	4563065	4562791	4562948	4563696	4563852	-0.011	1	1	1.0,0.968,1.0	1.0,1.0,1.0	266	149	84,54,42	0,1,0	41,48,56	0,0,0
A3SS2454	ENSG00000113282.13_2	CLINT1	chr5	-	157216370	157216575	157216370	157216521	157218710	157219003	0.181	3.94646e-07	2.73874e-05	0.62,0.712,0.603	0.447,0.425,0.519	203	149	271,229,215	122,68,104	193,184,175	175,183,119
A3SS2457	ENSG00000120318.15_2	ARAP3	chr5	-	141041250	141041822	141041250	141041356	141044488	141044652	0.04	1	1	1.0,0.879,1.0	1.0,0.858,0.902	615	149	26,30,39	0,1,0	39,25,38	0,1,1
A3SS2458	ENSG00000187109.13_3	NAP1L1	chr12	-	76449812	76449941	76449812	76449938	76453577	76453658	0.001	0.644026	1	0.98,0.981,0.98	0.974,0.98,0.984	152	149	3054,2880,2660	62,54,54	3595,3141,3145	95,64,51
A3SS2460	ENSG00000060566.13_2	CREB3L3	chr19	+	4156991	4157292	4156994	4157292	4154895	4155024	-0.077	0.305039	0.951274	0.584,0.601,0.485	0.495,0.71,0.696	152	149	53,20,25	37,13,26	3,5,7	3,2,3
A3SS2461	ENSG00000060566.13_2	CREB3L3	chr19	+	4164499	4164637	4164505	4164637	4159660	4159779	-0.037	0.844211	1	0.932,0.958,1.0	1.0,1.0,1.0	155	149	57,24,37	4,1,0	7,3,13	0,0,0
A3SS2464	ENSG00000114861.18_3	FOXP1	chr3	-	71026793	71026873	71026793	71026870	71026978	71027180	0.09	0.464617	1	0.889,0.831,0.7	0.802,0.578,0.771	152	149	41,20,31	5,4,13	29,7,24	7,5,7
A3SS2465	ENSG00000088340.15_3	FER1L4	chr20	-	34147281	34148405	34147281	34147394	34149618	34149704	-0.629	0.0189666	0.15255	0.0,0.114,1.0	1.0,1.0,1.0	1160	149	0,1,12	1,1,0	3,1,3	0,0,0
A3SS2474	ENSG00000167985.6_3	SDHAF2	chr11	+	61205716	61205814	61205766	61205814	61205475	61205585	-0.085	0.853201	1	0.692,0.428,0.529	0.375,0.529,1.0	199	149	3,1,3	1,1,2	4,3,2	5,2,0
A3SS2475	ENSG00000140319.10_2	SRP14	chr15	-	40329509	40329556	40329509	40329549	40330482	40330595	-0.011	1	1	1.0,1.0,0.968	1.0,1.0,1.0	156	149	35,40,32	0,0,1	26,24,19	0,0,0
A3SS2477	ENSG00000130024.14_2	PHF10	chr6	-	170117918	170118002	170117918	170117996	170118883	170119014	0.017	0.608521	1	0.771,0.841,0.816	0.73,0.881,0.765	155	149	105,88,97	30,16,21	191,184,166	68,24,49
A3SS2478	ENSG00000234545.7_3	FAM133B	chr7	-	92206968	92207031	92206968	92206990	92207463	92207496	0.028	0.10363	0.485672	0.928,0.926,0.932	0.918,0.909,0.875	190	149	392,301,331	24,19,19	242,178,205	17,14,23
A3SS2479	ENSG00000064042.17_3	LIMCH1	chr4	+	41678395	41678479	41678398	41678479	41673570	41673611	-0.007	0.489581	1	0.041,0.055,0.064	0.045,0.052,0.084	152	149	7,8,10	160,136,144	16,13,24	331,232,257
A3SS2481	ENSG00000137807.13_2	KIF23	chr15	+	69737128	69737380	69737149	69737380	69733106	69733418	0.007	0.829901	1	0.892,0.898,0.895	0.799,0.882,0.983	170	149	85,60,78	9,6,8	50,34,66	11,4,1
A3SS2482	ENSG00000137807.13_2	KIF23	chr15	+	69738621	69738703	69738624	69738703	69738347	69738430	0.009	0.405576	1	0.966,0.988,0.965	0.96,0.981,0.952	152	149	317,247,285	11,3,10	195,206,245	8,4,12
A3SS2483	ENSG00000070814.17_3	TCOF1	chr5	+	149767464	149767651	149767505	149767651	149759094	149759295	0.023	0.495259	1	1.0,1.0,1.0	0.967,0.964,1.0	190	149	71,76,70	0,0,0	74,103,87	2,3,0
A3SS2484	ENSG00000070814.17_3	TCOF1	chr5	+	149772267	149772353	149772270	149772353	149771519	149771739	0.002	0.891409	1	0.74,0.837,0.707	0.744,0.849,0.685	152	149	87,84,59	30,16,24	83,80,80	28,14,36
A3SS2486	ENSG00000155324.9_4	GRAMD2B	chr5	+	125820090	125820216	125820093	125820216	125819154	125819266	-0.018	0.340718	1	0.06,0.034,0.055	0.045,0.044,0.114	152	149	25,12,17	387,331,289	7,7,16	147,150,122
A3SS2487	ENSG00000158636.16_4	EMSY	chr11	+	76170976	76171129	76170979	76171129	76169226	76169402	0.011	0.767306	1	0.88,0.915,0.831	0.837,0.823,0.932	152	149	15,11,15	2,1,3	21,19,14	4,4,1
A3SS2488	ENSG00000158636.16_4	EMSY	chr11	+	76253211	76253411	76253259	76253411	76239311	76239510	-0.19	1	1	0.431,1.0,1.0	1.0,NA,1.0	197	149	4,1,6	4,0,0	3,0,1	0,0,0
A3SS2490	ENSG00000153944.10_4	MSI2	chr17	+	55752278	55752487	55752332	55752487	55729459	55729522	0.169	0.00592478	0.0649639	0.436,0.556,0.541	0.382,0.3,0.344	203	149	58,41,61	55,24,38	16,14,15	19,24,21
A3SS2493	ENSG00000142784.15_2	WDTC1	chr1	+	27623538	27623647	27623541	27623647	27622816	27622892	-0.039	0.0174204	0.144184	0.932,0.945,0.925	0.972,0.946,1.0	152	149	70,53,63	5,3,5	72,54,72	2,3,0
A3SS2494	ENSG00000142784.15_2	WDTC1	chr1	+	27630111	27631684	27631491	27631684	27627716	27627952	-0.12	0.0298417	0.207359	0.639,1.0,1.0	1.0,1.0,1.0	1529	149	91,80,79	5,0,0	75,89,93	0,0,0
A3SS2495	ENSG00000142784.15_2	WDTC1	chr1	+	27631491	27631684	27631549	27631684	27630111	27630286	0.061	0.00754903	0.0787339	1.0,1.0,1.0	0.898,0.944,0.975	207	149	63,64,54	0,0,0	61,47,54	5,2,1
A3SS2497	ENSG00000159348.12_2	CYB5R1	chr1	-	202935014	202935237	202935014	202935121	202935655	202935728	0.011	0.687309	1	0.019,0.049,0.012	0.0,0.047,0.0	265	149	2,3,1	58,33,46	0,3,0	28,34,54
A3SS2498	ENSG00000159348.12_2	CYB5R1	chr1	-	202935014	202935237	202935014	202935121	202935876	202936026	-0.64	1	1	0.36,NA,0.36	1.0,1.0,NA	265	149	1,0,1	1,0,1	1,2,0	0,0,0
A3SS2499	ENSG00000159348.12_2	CYB5R1	chr1	-	202935014	202935728	202935014	202935121	202935876	202936026	-0.05	1	1	0.934,1.0,0.916	1.0,1.0,1.0	756	149	72,42,55	1,0,1	33,31,52	0,0,0
A3SS2500	ENSG00000159348.12_2	CYB5R1	chr1	-	202935014	202935728	202935014	202935237	202935876	202936026	0.038	1	1	1.0,1.0,1.0	0.885,1.0,1.0	640	149	71,42,54	0,0,0	33,29,52	1,0,0
A3SS2501	ENSG00000091140.13_2	DLD	chr7	+	107545307	107545503	107545402	107545503	107543922	107543992	-0.004	0.276975	0.903679	0.006,0.012,0.036	0.006,0.037,0.023	244	149	3,4,11	303,201,179	3,16,10	287,257,263
A3SS2502	ENSG00000091140.13_2	DLD	chr7	+	107546711	107546813	107546715	107546813	107545805	107545949	0.003	1	1	1.0,1.0,1.0	0.994,0.996,1.0	153	149	258,213,250	0,0,0	317,255,248	2,1,0
A3SS2503	ENSG00000172053.17_1	QARS	chr3	-	49135424	49135550	49135424	49135525	49135624	49135691	0.001	1	1	0.996,0.996,0.99	0.995,0.983,1.0	174	149	295,298,239	1,1,2	467,416,398	2,6,0
A3SS2506	ENSG00000172053.17_1	QARS	chr3	-	49139851	49139905	49139851	49139881	49140777	49141139	-0.003	1	1	1.0,1.0,0.992	1.0,1.0,1.0	173	149	419,302,281	0,0,2	615,511,543	0,0,0
A3SS2507	ENSG00000172053.17_1	QARS	chr3	-	49140777	49140864	49140777	49140842	49141063	49141139	0.003	1	1	0.011,0.005,0.014	0.015,0.0,0.005	171	149	3,1,3	242,183,189	7,0,2	398,318,356
A3SS2508	ENSG00000172053.17_1	QARS	chr3	-	49140777	49140899	49140777	49140842	49141063	49141139	0.012	0.11476	0.51993	0.015,0.008,0.037	0.013,0.005,0.006	206	149	5,2,10	242,183,189	7,2,3	398,318,356
A3SS2509	ENSG00000172053.17_1	QARS	chr3	-	49140777	49140899	49140777	49140864	49141063	49141139	0.143	0.294193	0.935644	0.708,1.0,0.785	0.447,1.0,0.618	184	149	3,1,9	1,0,2	3,2,2	3,0,1
A3SS2510	ENSG00000172053.17_1	QARS	chr3	-	49141295	49141531	49141295	49141405	49141756	49141904	0.091	4.7472e-12	9.17736e-10	0.121,0.184,0.112	0.03,0.056,0.058	275	149	50,65,42	197,156,181	16,25,35	279,228,309
A3SS2511	ENSG00000172053.17_1	QARS	chr3	-	49141756	49141904	49141756	49141898	49142049	49142185	-0.004	1	1	1.0,0.987,1.0	1.0,1.0,1.0	155	149	179,162,147	0,2,0	173,173,226	0,0,0
A3SS2512	ENSG00000104064.16_2	GABPB1	chr15	-	50581679	50581865	50581679	50581862	50592985	50593099	-0.041	0.0335502	0.225668	0.87,0.848,0.91	0.945,0.923,0.882	152	149	171,171,154	25,30,15	158,158,160	9,13,21
A3SS2513	ENSG00000088970.15_3	KIZ	chr20	+	21224882	21227260	21227116	21227260	21213371	21213468	-0.094	1	1	1.0,1.0,0.719	1.0,1.0,1.0	2383	149	77,59,82	0,0,2	101,113,107	0,0,0
A3SS2515	ENSG00000028203.17_2	VEZT	chr12	+	95650925	95651015	95650929	95651015	95645715	95645847	-0.002	0.648202	1	0.965,0.928,0.958	0.961,0.905,0.99	153	149	113,80,71	4,6,3	76,59,99	3,6,1
A3SS2516	ENSG00000028203.17_2	VEZT	chr12	+	95650925	95651015	95650929	95651015	95650325	95650398	-0.03	0.73442	1	1.0,0.971,0.921	0.981,1.0,1.0	153	149	51,34,24	0,1,2	54,39,45	1,0,0
A3SS2517	ENSG00000028203.17_2	VEZT	chr12	+	95663814	95663964	95663826	95663964	95660132	95660408	0.025	0.581085	1	0.497,0.458,0.594	0.497,0.46,0.517	161	149	113,62,87	106,68,55	79,68,73	74,74,63
A3SS2518	ENSG00000028203.17_2	VEZT	chr12	+	95668517	95668665	95668521	95668665	95663814	95663964	-0.009	0.684346	1	0.981,0.974,1.0	1.0,0.982,1.0	153	149	216,156,171	4,4,0	142,166,134	0,3,0
A3SS2519	ENSG00000028203.17_2	VEZT	chr12	+	95692869	95694948	95693940	95694948	95689826	95690034	-0.003	0.71214	1	0.009,0.004,0.011	0.008,0.006,0.019	1220	149	20,8,21	277,219,240	15,8,27	216,169,174
A3SS2521	ENSG00000149187.18_4	CELF1	chr11	-	47498397	47498511	47498397	47498508	47498848	47498977	-0.018	0.772368	1	0.478,0.415,0.416	0.466,0.495,0.401	152	149	72,47,45	77,65,62	48,51,45	54,51,66
A3SS2522	ENSG00000149187.18_4	CELF1	chr11	-	47500428	47500504	47500428	47500492	47504246	47504408	0.03	0.53577	1	0.768,0.782,0.795	0.745,0.656,0.853	161	149	200,167,159	56,43,38	126,99,150	40,48,24
A3SS2523	ENSG00000149187.18_4	CELF1	chr11	-	47505940	47506075	47505940	47506072	47508301	47508350	-0.006	0.554493	1	0.979,0.943,0.959	0.95,0.978,0.972	152	149	375,303,307	8,18,13	313,269,284	16,6,8
A3SS2526	ENSG00000160255.17_3	ITGB2	chr21	-	46330198	46330330	46330198	46330287	46330639	46330700	-0.056	0.950175	1	0.437,0.0,0.0	0.437,0.115,0.053	192	149	4,0,0	4,8,5	2,1,1	2,6,14
A3SS2529	ENSG00000112319.17_3	EYA4	chr6	+	133783472	133783615	133783501	133783615	133782251	133782318	0.051	0.57668	1	1.0,1.0,1.0	0.893,1.0,0.953	178	149	64,28,57	0,0,0	20,44,48	2,0,2
A3SS2531	ENSG00000140553.17_2	UNC45A	chr15	+	91479366	91479690	91479514	91479690	91479175	91479212	-0.002	0.807873	1	0.03,0.033,0.029	0.027,0.062,0.01	297	149	10,11,6	164,164,102	4,9,2	71,68,95
A3SS2535	ENSG00000170919.15_3	TPT1-AS1	chr13	+	45951195	45951350	45951246	45951350	45944093	45944317	-0.104	0.0792916	0.408764	0.839,0.598,1.0	1.0,0.749,1.0	200	149	7,6,1	1,3,0	4,4,3	0,1,0
A3SS2536	ENSG00000170919.15_3	TPT1-AS1	chr13	+	45951195	45951350	45951274	45951350	45944093	45944317	0.417	2.31795e-08	2.20124e-06	1.0,1.0,1.0	0.364,0.62,0.766	228	149	9,6,2	0,0,0	7,5,5	8,2,1
A3SS2537	ENSG00000170919.15_3	TPT1-AS1	chr13	+	45951246	45951350	45951274	45951350	45944093	45944317	0.559	6.85855e-10	8.63379e-08	1.0,1.0,1.0	0.24,0.457,0.627	177	149	3,3,1	0,0,0	3,2,2	8,2,1
A3SS2538	ENSG00000170919.15_3	TPT1-AS1	chr13	+	45953329	45954136	45954060	45954136	45952664	45952806	0.124	1	1	1.0,1.0,1.0	1.0,1.0,0.629	880	149	7,5,8	0,0,0	12,6,10	0,0,1
A3SS2540	ENSG00000170919.15_3	TPT1-AS1	chr13	+	45964848	45965037	45964892	45965037	45963869	45963955	-0.142	0.0604116	0.340899	1.0,0.436,0.607	0.698,1.0,0.77	193	149	3,1,2	0,1,1	6,7,13	2,0,3
A3SS2541	ENSG00000180900.18_3	SCRIB	chr8	-	144874389	144874575	144874389	144874571	144874654	144874805	0.005	1	1	0.991,1.0,1.0	0.985,0.991,1.0	153	149	114,119,114	1,0,0	133,119,115	2,1,0
A3SS2542	ENSG00000180900.18_3	SCRIB	chr8	-	144874654	144875037	144874654	144874805	144875145	144875253	-0.011	1	1	0.966,1.0,1.0	1.0,1.0,1.0	381	149	73,71,63	1,0,0	75,59,64	0,0,0
A3SS2544	ENSG00000127022.14_3	CANX	chr5	+	179136873	179137066	179136919	179137066	179135978	179136060	-0.004	0.162026	0.650533	0.984,0.986,0.991	0.988,0.991,0.994	195	149	2536,1779,1776	32,20,12	2511,2106,2551	24,15,12
A3SS2548	ENSG00000100124.14_3	ANKRD54	chr22	-	38229690	38229762	38229690	38229757	38234506	38234600	-0.015	0.25731	0.860556	1.0,0.925,0.951	0.964,0.956,1.0	154	149	48,51,40	0,4,2	28,45,23	1,2,0
A3SS2549	ENSG00000100124.14_3	ANKRD54	chr22	-	38234506	38234605	38234506	38234600	38236193	38236241	-0.078	0.0218901	0.168791	0.754,0.889,0.921	0.943,0.948,0.906	154	149	19,33,24	6,4,2	17,19,10	1,1,1
A3SS2550	ENSG00000127311.9_2	HELB	chr12	+	66718686	66718906	66718762	66718906	66717762	66717991	0.051	0.686548	1	0.249,0.057,0.0	0.0,0.037,0.117	225	149	3,1,0	6,11,5	0,1,2	12,17,10
A3SS2551	ENSG00000159208.15_2	CIART	chr1	+	150255617	150256043	150255871	150256043	150254952	150255028	-0.213	1	1	1.0,NA,0.0	1.0,NA,0.425	403	149	1,0,0	0,0,2	1,0,2	0,0,1
A3SS2552	ENSG00000159208.15_2	CIART	chr1	+	150255617	150256043	150255923	150256043	150254952	150255028	-0.043	1	1	0.247,NA,1.0	1.0,0.0,1.0	455	149	1,0,1	1,0,0	1,0,3	0,1,0
A3SS2553	ENSG00000159208.15_2	CIART	chr1	+	150255871	150256043	150255923	150256043	150254952	150255028	0	1	1	0.0,NA,1.0	NA,0.0,1.0	201	149	0,0,3	1,0,0	0,0,2	0,1,0
A3SS2554	ENSG00000131652.13_2	THOC6	chr16	+	3076063	3076289	3076251	3076289	3075924	3075989	-0.007	1	1	0.979,1.0,1.0	1.0,1.0,1.0	337	149	108,90,107	1,0,0	104,89,110	0,0,0
A3SS2555	ENSG00000146530.11_2	VWDE	chr7	-	12376613	12376710	12376613	12376709	12376802	12376898	0.133	1	1	0.398,0.0,0.0	0.0,0.0,0.0	150	149	2,0,0	3,3,8	0,0,0	14,6,11
A3SS2558	ENSG00000169016.16_2	E2F6	chr2	-	11593707	11593924	11593707	11593848	11597304	11597359	0.013	0.567488	1	1.0,1.0,0.969	1.0,0.957,0.972	225	149	120,80,94	0,0,2	99,67,106	0,2,2
A3SS2559	ENSG00000189077.10_2	TMEM120A	chr7	-	75616302	75616603	75616302	75616541	75616677	75616746	0.005	0.740981	1	0.923,0.923,0.978	0.956,0.931,0.921	211	149	188,119,128	11,7,2	61,57,83	2,3,5
A3SS2560	ENSG00000189077.10_2	TMEM120A	chr7	-	75616677	75616746	75616677	75616737	75617035	75617128	0.064	1	1	1.0,1.0,1.0	0.912,0.895,1.0	158	149	20,23,15	0,0,0	11,9,12	1,1,0
A3SS2561	ENSG00000113108.19_3	APBB3	chr5	-	139941171	139941307	139941171	139941286	139941428	139941434	-0.178	0.274427	0.898654	0.305,0.127,0.18	0.0,0.369,0.778	170	149	3,2,1	6,12,4	0,2,4	1,3,1
A3SS2562	ENSG00000113108.19_3	APBB3	chr5	-	139941171	139941307	139941171	139941286	139941684	139941812	0.053	0.18513	0.706706	0.637,0.305,0.0	0.0,0.26,0.523	170	149	2,1,0	1,2,2	0,2,5	2,5,4
A3SS2563	ENSG00000113108.19_3	APBB3	chr5	-	139941428	139941580	139941428	139941434	139941684	139941812	-0.152	0.0122841	0.110399	1.0,0.532,0.847	1.0,1.0,0.835	295	149	10,9,11	0,4,1	6,5,10	0,0,1
A3SS2565	ENSG00000130703.15_2	OSBPL2	chr20	+	60835036	60835181	60835072	60835181	60831112	60831277	-0.004	0.647247	1	0.966,0.958,0.993	0.966,0.984,0.978	185	149	209,170,167	6,6,1	177,155,164	5,2,3
A3SS2566	ENSG00000173210.19_2	ABLIM3	chr5	+	148637853	148640002	148639108	148640002	148632319	148632400	-0.026	0.551903	1	0.975,0.927,1.0	1.0,1.0,0.979	1404	149	368,241,343	1,2,0	450,346,439	0,0,1
A3SS2568	ENSG00000128881.16_4	TTBK2	chr15	-	43164808	43164894	43164808	43164875	43170746	43170882	0.177	1	1	NA,1.0,1.0	0.47,1.0,1.0	168	149	0,1,2	0,0,0	1,4,1	1,0,0
A3SS2569	ENSG00000128881.16_4	TTBK2	chr15	-	43164808	43164956	43164808	43164875	43170746	43170882	0.015	1	1	1.0,1.0,1.0	0.954,1.0,1.0	230	149	23,10,23	0,0,0	32,30,21	1,0,0
A3SS2570	ENSG00000128881.16_4	TTBK2	chr15	-	43164808	43164956	43164808	43164894	43170746	43170882	0.014	1	1	1.0,1.0,1.0	0.958,1.0,1.0	211	149	23,9,21	0,0,0	32,26,20	1,0,0
A3SS2573	ENSG00000196547.14_3	MAN2A2	chr15	+	91454596	91454780	91454645	91454780	91454400	91454468	0.19	1	1	1.0,1.0,1.0	1.0,0.429,1.0	198	149	3,1,2	0,0,0	7,1,10	0,1,0
A3SS2574	ENSG00000196547.14_3	MAN2A2	chr15	+	91454614	91454780	91454645	91454780	91454400	91454468	0.009	1	1	1.0,1.0,1.0	1.0,0.972,1.0	180	149	38,24,31	0,0,0	52,42,44	0,1,0
A3SS2575	ENSG00000196547.14_3	MAN2A2	chr15	+	91455746	91455894	91455771	91455894	91455272	91455509	0.013	0.935786	1	0.243,0.363,0.363	0.388,0.243,0.3	174	149	9,6,16	24,9,24	20,9,14	27,24,28
A3SS2576	ENSG00000155393.12_3	HEATR3	chr16	+	50118018	50118202	50118044	50118202	50117847	50117938	-0.045	0.0605756	0.341203	0.07,0.019,0.0	0.0,0.136,0.089	175	149	4,1,0	45,43,45	0,7,3	36,38,26
A3SS2577	ENSG00000145730.20_3	PAM	chr5	+	102360834	102361038	102360837	102361038	102355493	102355547	-0.013	0.525168	1	0.865,0.86,0.91	0.907,0.872,0.894	152	149	157,119,114	24,19,11	219,187,259	22,27,30
A3SS2578	ENSG00000145730.20_3	PAM	chr5	+	102363885	102363942	102363888	102363942	102355493	102355547	-0.043	0.186395	0.711034	0.622,0.646,0.627	0.688,0.626,0.709	152	149	185,151,149	110,81,87	126,142,154	56,83,62
A3SS2579	ENSG00000145730.20_3	PAM	chr5	+	102363885	102363942	102363888	102363942	102360834	102361038	-0.017	0.621719	1	0.386,0.355,0.414	0.398,0.402,0.406	152	149	64,45,54	100,80,75	108,111,103	160,162,148
A3SS2580	ENSG00000148334.14_3	PTGES2	chr9	-	130884640	130884925	130884640	130884758	130885212	130885413	-0.002	0.909511	1	0.023,0.022,0.025	0.031,0.015,0.029	316	149	8,7,5	157,147,92	7,4,8	103,128,125
A3SS2581	ENSG00000148334.14_3	PTGES2	chr9	-	130885980	130886130	130885980	130886126	130886770	130886829	-0.002	0.964455	1	0.988,0.993,0.947	0.943,1.0,0.992	153	149	165,154,129	2,1,7	135,130,135	8,0,1
A3SS2582	ENSG00000168724.14_2	DNAJC21	chr5	+	34945826	34945908	34945865	34945908	34944971	34945130	-0.01	0.263005	0.873939	0.005,0.0,0.004	0.016,0.014,0.009	188	149	5,0,3	802,514,550	18,14,9	851,774,766
A3SS2583	ENSG00000186523.14_2	FAM86B1	chr8	-	12045580	12045725	12045580	12045682	12045819	12045933	0.931	1	1	NA,NA,1.0	0.0,0.0,0.206	192	149	0,0,2	0,0,0	0,0,1	1,2,3
A3SS2585	ENSG00000170100.13_3	ZNF778	chr16	+	89287404	89287560	89287411	89287560	89284117	89284318	-0.069	1	1	1.0,0.793,1.0	1.0,1.0,1.0	156	149	4,4,3	0,1,0	2,1,6	0,0,0
A3SS2594	ENSG00000087365.15_3	SF3B2	chr11	+	65823005	65823056	65823008	65823056	65822546	65822786	-0.015	0.222618	0.788863	0.893,0.922,0.922	0.921,0.932,0.929	152	149	331,300,265	39,25,22	262,324,318	22,23,24
A3SS2595	ENSG00000087365.15_3	SF3B2	chr11	+	65824736	65824846	65824739	65824846	65824308	65824426	0.017	0.114963	0.519967	0.935,0.922,0.931	0.917,0.915,0.904	152	149	485,533,415	33,44,30	676,516,507	60,47,53
A3SS2596	ENSG00000087365.15_3	SF3B2	chr11	+	65835416	65835516	65835419	65835516	65831098	65831200	0	0.830627	1	0.991,0.981,0.974	0.98,0.984,0.983	152	149	1242,1021,885	11,19,23	947,885,1051	19,14,18
A3SS2597	ENSG00000272869.5_4	AC008575.2	chr5	+	112200130	112200225	112200153	112200225	112198204	112198280	-0.004	1	1	0.0,0.0,0.0	0.008,0.0,0.004	172	149	0,0,0	357,265,284	2,0,1	203,191,229
A3SS2600	ENSG00000163006.11_4	CCDC138	chr2	+	109408010	109408258	109408130	109408258	109405307	109405422	0	1	1	0.004,0.0,0.006	0.0,0.0,0.011	269	149	1,0,1	129,79,100	0,0,2	129,121,97
A3SS2601	ENSG00000163006.11_4	CCDC138	chr2	+	109408010	109408258	109408135	109408258	109405307	109405422	-0.116	0.145367	0.607623	0.173,0.352,0.12	0.42,0.318,0.254	274	149	5,6,3	13,6,12	8,6,5	6,7,8
A3SS2602	ENSG00000163006.11_4	CCDC138	chr2	+	109408010	109408258	109408167	109408258	109405307	109405422	-0.068	0.0517309	0.304369	1.0,0.737,0.907	1.0,0.848,1.0	306	149	22,23,20	0,4,1	20,23,17	0,2,0
A3SS2603	ENSG00000163006.11_4	CCDC138	chr2	+	109408130	109408258	109408135	109408258	109405307	109405422	-0.032	0.0763247	0.400479	0.908,0.932,0.892	0.957,0.946,0.924	154	149	133,85,102	13,6,12	137,127,100	6,7,8
A3SS2604	ENSG00000163006.11_4	CCDC138	chr2	+	109408130	109408258	109408167	109408258	109405307	109405422	-0.013	0.78518	1	1.0,0.953,0.99	1.0,0.983,1.0	186	149	150,102,119	0,4,1	149,144,112	0,2,0
A3SS2605	ENSG00000163006.11_4	CCDC138	chr2	+	109408135	109408258	109408167	109408258	109405307	109405422	-0.041	0.165002	0.658671	1.0,0.826,0.96	1.0,0.908,1.0	181	149	30,23,29	0,4,1	18,24,20	0,2,0
A3SS2606	ENSG00000163006.11_4	CCDC138	chr2	+	109421344	109421464	109421347	109421464	109414883	109415042	-0.018	0.692401	1	0.891,0.79,0.95	0.878,0.875,0.933	152	149	100,69,97	12,18,5	140,107,114	19,15,8
A3SS2608	ENSG00000197620.10_3	CXorf40A	chrX	+	148627147	148627429	148627313	148627429	148626913	148627046	-0.029	0.383806	1	0.973,0.975,0.952	0.987,1.0,1.0	315	149	77,81,84	1,1,2	159,56,76	1,0,0
A3SS2610	ENSG00000140983.13_3	RHOT2	chr16	+	718352	718411	718357	718411	718150	718236	-0.018	0.32612	0.988403	0.931,0.916,0.91	0.93,0.956,0.926	154	149	112,90,105	8,8,10	82,89,78	6,4,6
A3SS2611	ENSG00000140983.13_3	RHOT2	chr16	+	718487	718699	718655	718699	718352	718411	-0.169	3.70774e-05	0.00134698	0.796,0.612,0.716	0.885,0.891,0.854	317	149	158,114,129	19,34,24	147,139,124	9,8,10
A3SS2614	ENSG00000140983.13_3	RHOT2	chr16	+	720248	720357	720265	720357	720122	720175	0.024	0.607203	1	0.855,0.797,0.85	0.88,0.695,0.856	166	149	92,83,101	14,19,16	90,71,99	11,28,15
A3SS2615	ENSG00000140983.13_3	RHOT2	chr16	+	720888	721000	720891	721000	720674	720773	-0.002	0.85401	1	0.046,0.134,0.045	0.082,0.081,0.068	152	149	4,9,3	82,57,62	7,6,6	77,67,80
A3SS2616	ENSG00000140983.13_3	RHOT2	chr16	+	721082	721203	721114	721203	720891	721000	-0.016	0.438713	1	0.944,0.85,0.934	0.987,0.914,0.874	181	149	103,96,86	5,14,5	90,90,76	1,7,9
A3SS2617	ENSG00000173338.12_2	KCNK7	chr11	-	65360325	65360854	65360325	65360681	65360946	65361345	0.184	1	1	1.0,0.0,NA	0.316,NA,NA	322	149	1,0,0	0,1,0	1,0,0	1,0,0
A3SS2618	ENSG00000107959.15_3	PITRM1	chr10	-	3185580	3185923	3185580	3185693	3186483	3186558	-0.012	0.482205	1	0.005,0.006,0.006	0.012,0.032,0.01	379	149	1,1,1	83,71,63	3,7,2	100,84,76
A3SS2620	ENSG00000197555.9_3	SIPA1L1	chr14	+	72171437	72172057	72171938	72172057	72169097	72169222	-0.041	0.0058536	0.0646643	0.018,0.0,0.048	0.045,0.017,0.127	650	149	3,0,7	38,31,32	6,2,14	29,26,22
A3SS2621	ENSG00000197555.9_3	SIPA1L1	chr14	+	72204957	72205042	72204960	72205042	72201993	72202108	-0.134	0.0443056	0.271896	0.52,0.52,0.514	0.746,0.606,0.605	152	149	21,21,28	19,19,26	30,22,25	10,14,16
A3SS2624	ENSG00000039650.11_3	PNKP	chr19	-	50369655	50369785	50369655	50369702	50370310	50370474	-0.269	0.0201195	0.158572	0.452,0.155,0.423	0.562,0.643,0.631	232	149	9,2,8	7,7,7	18,14,16	9,5,6
A3SS2625	ENSG00000169727.12_2	GPS1	chr17	+	80010131	80010335	80010134	80010335	80009772	80009840	0.332	1	1	1.0,1.0,0.495	0.0,NA,1.0	152	149	2,3,1	0,0,1	0,0,2	2,0,0
A3SS2628	ENSG00000169727.12_2	GPS1	chr17	+	80012373	80012418	80012385	80012418	80011743	80011925	-0.008	0.830322	1	0.215,0.136,0.195	0.167,0.208,0.194	161	149	53,30,41	179,177,157	33,34,36	152,120,138
A3SS2629	ENSG00000169727.12_2	GPS1	chr17	+	80013037	80013098	80013040	80013098	80012773	80012851	0.016	0.721001	1	0.87,0.819,0.925	0.801,0.86,0.906	152	149	218,208,164	32,45,13	111,100,137	27,16,14
A3SS2630	ENSG00000169727.12_2	GPS1	chr17	+	80014715	80015346	80014928	80015346	80014504	80014642	-0.001	1	1	0.988,1.0,0.984	1.0,0.975,1.0	362	149	205,162,150	1,0,1	149,188,161	0,2,0
A3SS2631	ENSG00000204574.12_3	ABCF1	chr6	+	30545849	30545979	30545852	30545979	30545594	30545690	-0.012	0.688392	1	0.513,0.538,0.541	0.532,0.558,0.537	152	149	230,203,195	214,171,162	124,138,123	107,107,104
A3SS2633	ENSG00000092529.23_3	CAPN3	chr15	+	42702605	42702694	42702625	42702694	42702128	42702193	1	1	1	1.0,NA,NA	0.0,NA,0.0	169	149	1,0,0	0,0,0	0,0,0	2,0,5
A3SS2638	ENSG00000126453.9_2	BCL2L12	chr19	+	50170275	50170418	50170278	50170418	50169941	50170056	-0.05	0.0566057	0.323897	0.919,0.952,0.802	0.942,0.981,0.901	152	149	127,121,66	11,6,16	66,103,93	4,2,10
A3SS2639	ENSG00000133997.11_3	MED6	chr14	-	71059596	71059726	71059596	71059705	71060012	71060095	-0.003	0.827195	1	0.031,0.03,0.029	0.067,0.014,0.019	170	149	4,3,3	111,85,89	7,1,2	86,64,90
A3SS2640	ENSG00000133997.11_3	MED6	chr14	-	71063327	71063419	71063327	71063415	71064334	71064494	0.008	1	1	1.0,1.0,1.0	0.975,1.0,1.0	153	149	120,88,104	0,0,0	80,75,90	2,0,0
A3SS2641	ENSG00000133997.11_3	MED6	chr14	-	71063327	71063459	71063327	71063415	71064334	71064494	0.075	1	1	1.0,1.0,1.0	0.776,1.0,1.0	193	149	8,6,9	0,0,0	9,4,7	2,0,0
A3SS2643	ENSG00000117407.16_3	ARTN	chr1	+	44401261	44401388	44401326	44401388	44399783	44399932	0.226	0.282999	0.910205	0.924,0.918,1.0	0.582,1.0,0.582	214	149	35,48,26	2,3,0	2,3,2	1,0,1
A3SS2644	ENSG00000117407.16_3	ARTN	chr1	+	44401740	44401903	44401764	44401903	44401261	44401388	0.699	1	1	0.564,0.812,0.721	0.0,0.0,NA	173	149	9,15,3	6,3,1	0,0,0	1,2,0
A3SS2646	ENSG00000156232.7_2	WHAMM	chr15	+	83495139	83495248	83495161	83495248	83491851	83492039	-0.011	0.84192	1	0.092,0.0,0.111	0.095,0.045,0.096	171	149	8,0,7	69,41,49	9,3,6	75,55,49
A3SS2647	ENSG00000114270.17_3	COL7A1	chr3	-	48607566	48607767	48607566	48607611	48607897	48607933	-0.021	0.0409656	0.258983	0.961,1.0,0.925	0.985,0.995,0.968	305	149	150,108,202	3,0,8	400,371,312	3,1,5
A3SS2648	ENSG00000114270.17_3	COL7A1	chr3	-	48608675	48609478	48608675	48608711	48609559	48609604	-0.008	1	1	1.0,1.0,0.977	1.0,1.0,1.0	916	149	182,128,256	0,0,1	511,408,464	0,0,0
A3SS2650	ENSG00000155545.19_2	MIER3	chr5	-	56224593	56224688	56224593	56224685	56226490	56226572	0.025	0.657291	1	0.642,0.806,0.727	0.645,0.693,0.763	152	149	53,51,38	29,12,14	37,23,23	20,10,7
A3SS2651	ENSG00000155545.19_2	MIER3	chr5	-	56242752	56242913	56242752	56242898	56246454	56246479	0.003	1	1	0.019,0.0,0.019	0.0,0.0,0.03	164	149	1,0,1	46,41,46	0,0,1	27,25,29
A3SS2652	ENSG00000182199.10_3	SHMT2	chr12	+	57626207	57626358	57626235	57626358	57625993	57626075	-0.02	3.93392e-06	0.000185168	0.011,0.013,0.004	0.026,0.024,0.037	177	149	8,7,2	583,456,409	22,22,38	693,741,830
A3SS2660	ENSG00000140521.12_3	POLG	chr15	-	89860606	89860767	89860606	89860707	89861771	89861980	-0.023	0.0162705	0.136971	0.967,0.962,0.973	0.98,1.0,0.992	209	149	207,180,200	5,5,4	139,126,168	2,0,1
A3SS2661	ENSG00000140521.12_3	POLG	chr15	-	89861169	89861268	89861169	89861206	89861771	89861980	0.04	1	1	0.952,1.0,0.961	0.958,0.902,0.932	211	149	28,29,35	1,0,1	32,13,39	1,1,2
A3SS2662	ENSG00000140521.12_3	POLG	chr15	-	89862458	89862639	89862458	89862581	89863996	89864243	-0.009	0.222683	0.788863	0.014,0.016,0.017	0.045,0.012,0.016	207	149	3,3,3	150,129,128	9,2,3	136,122,131
A3SS2663	ENSG00000140521.12_3	POLG	chr15	-	89863996	89864491	89863996	89864243	89864966	89865084	-0.006	0.224992	0.795481	0.813,1.0,0.843	0.91,0.765,1.0	397	149	81,72,86	7,0,6	54,26,45	2,3,0
A3SS2664	ENSG00000140521.12_3	POLG	chr15	-	89866634	89866783	89866634	89866742	89867045	89867132	0.004	0.48846	1	0.035,0.041,0.038	0.042,0.006,0.055	190	149	8,8,7	175,147,139	5,1,7	90,122,94
A3SS2665	ENSG00000140521.12_3	POLG	chr15	-	89870142	89870310	89870142	89870294	89870397	89870580	-0.008	0.597179	1	0.006,0.022,0.022	0.016,0.019,0.038	165	149	1,4,4	157,162,162	3,2,4	166,91,91
A3SS2666	ENSG00000124279.11_3	FASTKD3	chr5	-	7861695	7861886	7861695	7861765	7862935	7863110	-0.059	0.0163792	0.137246	0.157,0.147,0.204	0.232,0.23,0.223	270	149	52,39,52	154,125,112	68,45,51	124,83,98
A3SS2667	ENSG00000140854.12_3	KATNB1	chr16	+	57789701	57789829	57789752	57789829	57789256	57789406	0.05	0.313128	0.966893	0.369,0.321,0.341	0.334,0.297,0.251	200	149	33,19,25	42,30,36	31,21,18	46,37,40
A3SS2670	ENSG00000112242.14_3	E2F3	chr6	+	20481436	20481656	20481454	20481656	20480076	20480188	0.086	0.00478782	0.0565861	0.897,1.0,0.942	0.845,0.847,0.889	167	149	49,43,55	5,0,3	61,56,54	10,9,6
A3SS2675	ENSG00000092929.11_3	UNC13D	chr17	-	73832652	73832777	73832652	73832674	73832881	73832999	-0.032	0.0793507	0.408764	0.965,0.963,0.932	1.0,0.968,0.987	252	149	93,87,69	2,2,3	109,102,129	0,2,1
A3SS2676	ENSG00000092929.11_3	UNC13D	chr17	-	73836305	73836448	73836305	73836410	73836587	73836657	-0.001	0.71749	1	0.034,0.02,0.018	0.026,0.019,0.029	187	149	4,2,2	90,79,87	6,4,5	180,166,132
A3SS2677	ENSG00000092929.11_3	UNC13D	chr17	-	73837037	73837113	73837037	73837082	73838513	73838694	-0.023	0.0267707	0.19451	0.017,0.042,0.0	0.019,0.072,0.037	180	149	2,4,0	95,76,82	3,10,5	128,106,107
A3SS2678	ENSG00000092929.11_3	UNC13D	chr17	-	73839239	73839347	73839239	73839329	73839564	73839600	0.009	1	1	1.0,1.0,1.0	0.985,1.0,0.987	167	149	70,51,63	0,0,0	75,91,83	1,0,1
A3SS2679	ENSG00000115507.9_2	OTX1	chr2	+	63281066	63281333	63281181	63281333	63280014	63280222	0.025	1	1	0.0,0.0,0.075	0.0,0.0,0.0	264	149	0,0,1	7,3,7	0,0,0	2,5,9
A3SS2682	ENSG00000092201.9_2	SUPT16H	chr14	-	21840032	21840203	21840032	21840129	21841496	21841589	0.002	1	1	1.0,1.0,1.0	1.0,0.994,1.0	223	149	154,106,143	0,0,0	276,252,278	0,1,0
A3SS2684	ENSG00000140682.18_3	TGFB1I1	chr16	+	31485883	31487506	31487332	31487506	31485670	31485776	-0.028	1	1	1.0,0.915,1.0	1.0,1.0,1.0	1598	149	152,116,136	0,1,0	164,164,247	0,0,0
A3SS2685	ENSG00000169714.16_3	CNBP	chr3	-	128889921	128890123	128889921	128890120	128890288	128890381	0.036	0.0527683	0.308011	0.3,0.293,0.296	0.251,0.264,0.265	152	149	571,463,431	1309,1097,1006	459,458,464	1342,1253,1262
A3SS2686	ENSG00000169714.16_3	CNBP	chr3	-	128889921	128890126	128889921	128890120	128890288	128890381	-0.004	0.269741	0.889932	0.015,0.019,0.024	0.018,0.022,0.03	155	149	21,22,26	1309,1097,1006	25,30,40	1342,1253,1262
A3SS2687	ENSG00000169714.16_3	CNBP	chr3	-	128889921	128890126	128889921	128890123	128890288	128890381	-0.02	0.0136303	0.11881	0.029,0.037,0.054	0.049,0.055,0.076	152	149	17,18,25	567,459,430	24,27,39	458,455,463
A3SS2688	ENSG00000169714.16_3	CNBP	chr3	-	128890288	128890381	128890288	128890351	128890476	128890614	-0.016	0.0016901	0.0263646	0.989,0.974,0.98	0.998,0.995,0.997	179	149	1169,1031,898	11,23,15	1455,1339,1246	2,6,3
A3SS2689	ENSG00000169714.16_3	CNBP	chr3	-	128890288	128890381	128890288	128890351	128890497	128890614	-0.001	1	1	0.999,0.999,1.0	1.0,1.0,1.0	179	149	936,901,828	1,1,0	917,805,831	0,0,0
A3SS2690	ENSG00000156531.16_2	PHF6	chrX	+	133547517	133547687	133547520	133547687	133527938	133527982	0.012	0.615713	1	0.229,0.217,0.199	0.214,0.19,0.205	152	149	91,74,68	301,261,269	62,37,49	223,155,186
A3SS2691	ENSG00000141994.15_3	DUS3L	chr19	-	5786759	5786930	5786759	5786856	5787071	5787182	0.016	0.906331	1	0.0,0.118,0.093	0.065,0.0,0.097	223	149	0,4,2	22,20,13	3,0,5	29,33,31
A3SS2695	ENSG00000126391.13_2	FRMD8	chr11	+	65156831	65156999	65156855	65156999	65154507	65154592	-0.038	1	1	1.0,1.0,0.886	1.0,1.0,1.0	173	149	28,16,18	0,0,2	41,19,32	0,0,0
A3SS2697	ENSG00000105647.16_3	PIK3R2	chr19	+	18276920	18277112	18276969	18277112	18274072	18274198	0.021	0.0824878	0.419255	0.06,0.045,0.03	0.015,0.045,0.012	198	149	9,5,4	107,79,96	3,8,2	144,127,119
A3SS2698	ENSG00000105647.16_3	PIK3R2	chr19	+	18279535	18279706	18279539	18279706	18279284	18279356	0.007	1	1	0.991,1.0,1.0	0.991,0.979,1.0	153	149	109,128,101	1,0,0	112,97,100	1,2,0
A3SS2699	ENSG00000101182.14_3	PSMA7	chr20	-	60712419	60712521	60712419	60712482	60713226	60713346	-0.001	1	1	0.002,0.001,0.002	0.002,0.003,0.002	188	149	8,5,6	2904,2757,2585	7,7,6	2245,1968,2312
A3SS2700	ENSG00000140416.19_4	TPM1	chr15	+	63335667	63336030	63335904	63336030	63334949	63335142	-0.094	0.0486954	0.292226	0.072,0.088,1.0	0.279,0.162,1.0	386	149	1,1,1	5,4,0	5,3,2	5,6,0
A3SS2703	ENSG00000096384.19_2	HSP90AB1	chr6	+	44216353	44216513	44216366	44216513	44214823	44214932	0.006	0.278207	0.905376	0.012,0.011,0.013	0.004,0.007,0.007	162	149	36,28,28	2653,2273,2006	6,14,20	1434,1781,2476
A3SS2704	ENSG00000189164.14_2	ZNF527	chr19	+	37870949	37871274	37871178	37871274	37870021	37870148	0.047	0.598893	1	0.0,0.09,0.403	0.123,0.228,0.0	378	149	0,2,12	16,8,7	5,3,0	14,4,6
A3SS2705	ENSG00000129354.11_3	AP1M2	chr19	-	10683346	10683764	10683346	10683571	10685092	10685168	-0.004	1	1	0.98,0.985,0.986	1.0,0.975,0.988	342	149	224,155,157	2,1,1	223,358,375	0,4,2
A3SS2708	ENSG00000213339.8_3	QTRT1	chr19	+	10818141	10818291	10818175	10818291	10817977	10818056	0.012	0.699351	1	0.034,0.039,0.032	0.03,0.027,0.011	183	149	1,1,1	23,20,25	3,2,1	79,58,75
A3SS2709	ENSG00000122034.14_3	GTF3A	chr13	+	28004669	28004758	28004674	28004758	28004006	28004103	0.007	0.939659	1	0.988,0.991,1.0	0.992,0.965,1.0	154	149	335,338,289	4,3,0	405,282,368	3,10,0
A3SS2710	ENSG00000235706.7_3	DICER1-AS1	chr14	+	95645835	95646262	95645840	95646262	95625212	95625372	0.151	0.00126089	0.0211306	0.871,1.0,1.0	0.829,0.795,0.795	154	149	7,3,5	1,0,0	15,4,12	3,1,3
A3SS2711	ENSG00000237298.9_4	TTN-AS1	chr2	+	179402087	179402418	179402330	179402418	179400458	179400555	0.116	0.199248	0.739326	0.16,0.0,0.275	0.0,0.0,0.087	392	149	1,0,3	2,1,3	0,0,1	5,7,4
A3SS2712	ENSG00000237298.9_4	TTN-AS1	chr2	+	179465202	179465394	179465284	179465394	179464320	179464477	-0.418	1	1	0.0,NA,0.0	0.492,0.763,0.0	231	149	0,0,0	1,0,1	3,5,0	2,1,1
A3SS2713	ENSG00000089685.14_3	BIRC5	chr17	+	76212046	76212862	76212744	76212862	76210760	76210870	-0.009	0.000748448	0.0142653	0.009,0.008,0.006	0.017,0.018,0.015	847	149	22,18,11	425,370,323	37,32,29	366,305,337
A3SS2717	ENSG00000088205.12_2	DDX18	chr2	+	118582515	118582677	118582572	118582677	118582144	118582284	0	1	1	0.992,0.991,1.0	0.997,0.997,0.989	206	149	364,314,320	2,2,0	518,417,503	1,1,4
A3SS2718	ENSG00000068354.15_3	TBC1D25	chrX	+	48417284	48417734	48417545	48417734	48399720	48399830	-0.052	1	1	1.0,1.0,0.845	1.0,1.0,1.0	410	149	15,19,15	0,0,1	7,15,3	0,0,0
A3SS2719	ENSG00000168096.14_3	ANKS3	chr16	-	4752102	4752243	4752102	4752238	4755095	4755254	-0.006	1	1	0.983,1.0,1.0	1.0,1.0,1.0	154	149	60,41,42	1,0,0	19,35,29	0,0,0
A3SS2720	ENSG00000168096.14_3	ANKS3	chr16	-	4776659	4776781	4776659	4776777	4776979	4777178	0.062	0.232383	0.808548	1.0,1.0,0.936	0.907,0.843,1.0	153	149	18,16,15	0,0,1	20,11,12	2,2,0
A3SS2721	ENSG00000168096.14_3	ANKS3	chr16	-	4776659	4776855	4776659	4776777	4776979	4777178	0.105	0.0848753	0.427015	1.0,1.0,0.724	0.747,0.663,1.0	227	149	2,5,4	0,0,1	9,6,4	2,2,0
A3SS2722	ENSG00000168096.14_3	ANKS3	chr16	-	4776659	4776855	4776659	4776781	4776979	4777178	-0.096	0.0863212	0.43174	0.069,0.173,0.151	0.231,0.267,0.182	223	149	2,5,4	18,16,15	9,6,4	20,11,12
A3SS2723	ENSG00000166012.16_3	TAF1D	chr11	-	93465409	93465479	93465409	93465457	93466252	93466287	0.064	2.11053e-12	4.56973e-10	0.107,0.125,0.12	0.05,0.057,0.054	171	149	109,85,103	792,520,661	92,87,94	1528,1253,1441
A3SS2724	ENSG00000166012.16_3	TAF1D	chr11	-	93466515	93466585	93466515	93466563	93467790	93467826	0.083	0.000310762	0.00721956	0.406,0.387,0.417	0.324,0.331,0.305	171	149	301,212,272	384,292,332	425,355,394	773,626,784
A3SS2725	ENSG00000166012.16_3	TAF1D	chr11	-	93466515	93466671	93466515	93466563	93467790	93467826	0.013	0.411595	1	0.196,0.17,0.21	0.175,0.186,0.175	257	149	161,103,152	384,292,332	282,247,286	773,626,784
A3SS2726	ENSG00000166012.16_3	TAF1D	chr11	-	93466515	93466671	93466515	93466585	93467790	93467826	-0.079	0.00030133	0.0070306	0.172,0.164,0.193	0.249,0.247,0.271	235	149	68,49,73	208,158,193	156,116,153	299,224,261
A3SS2727	ENSG00000166012.16_3	TAF1D	chr11	-	93471274	93471665	93471274	93471606	93472402	93472497	0.003	0.535568	1	0.979,0.971,0.965	0.964,0.96,0.983	208	149	587,425,504	9,9,13	1091,937,1101	29,28,14
A3SS2728	ENSG00000173598.13_3	NUDT4	chr12	+	93792543	93792631	93792546	93792631	93789264	93789309	0.056	0.0698865	0.376789	0.419,0.425,0.487	0.387,0.402,0.373	152	149	165,126,153	224,167,158	101,81,94	157,118,155
A3SS2729	ENSG00000183765.20_2	CHEK2	chr22	-	29091114	29091230	29091114	29091197	29091697	29091861	-0.034	0.0188455	0.151802	0.944,0.911,0.965	0.95,0.987,0.985	182	149	123,113,102	6,9,3	161,179,166	7,2,2
A3SS2730	ENSG00000156787.16_3	TBC1D31	chr8	+	124121713	124121860	124121767	124121860	124121556	124121636	-0.15	0.00309547	0.0405709	0.905,0.911,0.734	1.0,1.0,1.0	203	149	13,14,15	1,1,4	18,21,23	0,0,0
A3SS2731	ENSG00000156787.16_3	TBC1D31	chr8	+	124141305	124141458	124141309	124141458	124138747	124138927	0.333	1	1	0.0,0.0,1.0	0.0,0.0,0.0	153	149	0,0,1	3,3,0	0,0,0	1,2,3
A3SS2732	ENSG00000156787.16_3	TBC1D31	chr8	+	124141305	124141458	124141309	124141458	124140520	124140753	-0.054	0.0730556	0.389606	0.904,0.911,0.953	0.93,1.0,1.0	153	149	29,21,21	3,2,1	41,14,29	3,0,0
A3SS2734	ENSG00000106258.13_2	CYP3A5	chr7	-	99270202	99270538	99270202	99270302	99272155	99272208	0.002	1	1	0.0,0.0,0.006	0.0,0.0,0.0	385	149	0,0,1	92,49,67	0,0,0	21,16,22
A3SS2736	ENSG00000106258.13_2	CYP3A5	chr7	-	99273737	99274199	99273737	99273831	99277448	99277619	0.015	0.772894	1	0.148,0.134,0.312	0.147,0.178,0.224	517	149	32,28,41	53,52,26	6,6,8	10,8,8
A3SS2742	ENSG00000168883.19_3	USP39	chr2	+	85850748	85850905	85850768	85850905	85848607	85848702	-0.008	0.399668	1	0.014,0.017,0.025	0.047,0.0,0.032	169	149	3,3,4	186,154,139	6,0,5	108,105,134
A3SS2743	ENSG00000089053.12_2	ANAPC5	chr12	-	121756079	121756207	121756079	121756154	121756303	121756411	-0.066	0.000134109	0.00372272	0.912,0.965,0.884	0.959,1.0,1.0	202	149	98,75,62	7,2,6	63,81,80	2,0,0
A3SS2744	ENSG00000089053.12_2	ANAPC5	chr12	-	121756079	121756227	121756079	121756154	121756303	121756411	-0.022	0.034283	0.229092	0.969,0.99,0.965	0.99,1.0,1.0	222	149	327,298,243	7,2,6	309,345,374	2,0,0
A3SS2745	ENSG00000089053.12_2	ANAPC5	chr12	-	121756079	121756227	121756079	121756207	121756303	121756411	-0.011	0.138016	0.585026	0.99,0.962,0.982	0.991,0.983,0.992	169	149	231,231,184	2,8,3	248,268,296	2,4,2
A3SS2746	ENSG00000089053.12_2	ANAPC5	chr12	-	121766118	121766300	121766118	121766261	121768385	121768475	-0.031	0.282297	0.909635	0.79,0.738,0.78	0.853,0.801,0.748	188	149	218,192,179	46,54,40	263,229,288	36,45,77
A3SS2747	ENSG00000143416.20_3	SELENBP1	chr1	-	151338243	151338929	151338243	151338322	151339197	151339380	0.224	3.80841e-08	3.27221e-06	1.0,1.0,0.939	0.712,0.727,0.828	756	149	136,108,78	0,0,1	88,81,122	7,6,5
A3SS2748	ENSG00000143416.20_3	SELENBP1	chr1	-	151341479	151342030	151341479	151341665	151342188	151342245	-0.017	1	1	1.0,0.948,1.0	1.0,1.0,1.0	514	149	114,63,80	0,1,0	79,83,109	0,0,0
A3SS2750	ENSG00000018189.12_3	RUFY3	chr4	+	71659481	71659621	71659501	71659621	71655211	71655309	0.021	0.638711	1	0.227,0.227,0.306	0.164,0.248,0.286	169	149	1,1,2	3,3,4	2,3,5	9,8,11
A3SS2751	ENSG00000228474.5_2	OST4	chr2	-	27293339	27293610	27293339	27293589	27294193	27294331	0	1	1	0.002,0.0,0.0	0.0,0.0,0.001	170	149	2,0,0	709,592,512	0,0,1	583,580,683
A3SS2752	ENSG00000090316.15_2	MAEA	chr4	+	1332209	1332405	1332213	1332405	1330648	1330782	-0.031	0.439088	1	0.985,0.902,1.0	1.0,0.979,1.0	153	149	68,47,65	1,5,0	57,48,105	0,1,0
A3SS2753	ENSG00000103769.9_3	RAB11A	chr15	+	66172008	66172089	66172062	66172089	66170099	66170293	-0.001	1	1	0.998,1.0,1.0	1.0,1.0,1.0	203	149	1406,1139,1012	2,0,0	833,739,757	0,0,0
A3SS2754	ENSG00000088280.18_3	ASAP3	chr1	-	23768147	23768223	23768147	23768212	23768678	23768764	0.088	1	1	1.0,1.0,1.0	1.0,0.736,1.0	160	149	15,13,8	0,0,0	8,3,7	0,1,0
A3SS2755	ENSG00000122390.17_3	NAA60	chr16	+	3534690	3535083	3534761	3535083	3532501	3532598	0.119	0.12504	0.549541	0.934,1.0,0.766	0.682,0.796,0.865	220	149	21,19,29	1,0,6	19,23,19	6,4,2
A3SS2756	ENSG00000158796.16_2	DEDD	chr1	-	161092864	161093011	161092864	161092964	161093628	161093736	0.011	1	1	0.992,1.0,0.992	1.0,1.0,0.952	196	149	164,144,162	1,0,1	114,105,104	0,0,4
A3SS2757	ENSG00000158796.16_2	DEDD	chr1	-	161093927	161094316	161093927	161094000	161100604	161100637	-0.011	1	1	0.98,0.988,1.0	1.0,1.0,1.0	465	149	300,258,243	2,1,0	213,196,179	0,0,0
A3SS2759	ENSG00000273611.4_3	ZNHIT3	chr17	+	34848656	34848743	34848661	34848743	34842778	34842810	-0.005	0.562385	1	0.987,0.977,0.992	0.997,0.98,0.994	154	149	389,344,257	5,8,2	334,306,340	1,6,2
A3SS2760	ENSG00000273611.4_3	ZNHIT3	chr17	+	34849769	34849850	34849803	34849850	34848656	34848743	0.003	1	1	0.998,1.0,0.993	0.991,0.995,0.997	183	149	499,501,366	1,0,2	560,458,483	4,2,1
A3SS2762	ENSG00000197448.13_2	GSTK1	chr7	+	142961640	142962185	142962084	142962185	142961178	142961260	0.007	1	1	1.0,1.0,1.0	1.0,0.98,1.0	593	149	260,201,201	0,0,0	205,200,271	0,1,0
A3SS2764	ENSG00000102908.20_3	NFAT5	chr16	+	69718789	69718873	69718792	69718873	69711105	69711238	-0.042	0.323286	0.98559	0.681,0.797,0.669	0.702,0.761,0.809	152	149	48,20,35	22,5,17	24,13,26	10,4,6
A3SS2765	ENSG00000146729.9_4	NIPSNAP2	chr7	+	56047452	56047579	56047455	56047579	56046042	56046088	-0.5	1	1	0.0,NA,1.0	1.0,1.0,NA	152	149	0,0,1	1,0,0	1,2,0	0,0,0
A3SS2768	ENSG00000205809.9_3	KLRC2	chr12	-	10586389	10586541	10586389	10586468	10587084	10587129	-0.058	1	1	1.0,0.825,1.0	1.0,1.0,1.0	222	149	11,7,10	0,1,0	3,2,4	0,0,0
A3SS2769	ENSG00000157625.15_2	TAB3	chrX	-	30861082	30864761	30861082	30861166	30870894	30871055	-0.452	2.05916e-11	3.27831e-09	0.156,0.157,0.137	0.705,0.562,0.538	3744	149	65,61,108	14,13,27	180,129,117	3,4,4
A3SS2770	ENSG00000187775.16_2	DNAH17	chr17	-	76421426	76421672	76421426	76421652	76422537	76422681	-0.033	1	1	0.0,0.0,0.0	0.099,0.0,0.0	169	149	0,0,0	11,14,5	1,0,0	8,1,1
A3SS2772	ENSG00000243406.6_2	MRPS31P5	chr13	-	52744121	52744234	52744121	52744191	52745292	52745383	-0.112	0.55976	1	0.608,1.0,0.608	1.0,0.756,0.795	192	149	2,1,6	1,0,3	8,12,5	0,3,1
A3SS2774	ENSG00000168944.15_3	CEP120	chr5	-	122725617	122726059	122725617	122725834	122726803	122727031	-0.013	0.573	1	0.0,0.0,0.013	0.034,0.0,0.017	374	149	0,0,1	39,17,31	4,0,2	45,36,45
A3SS2775	ENSG00000198758.10_2	EPS8L3	chr1	-	110294616	110294815	110294616	110294725	110295307	110295342	0.04	1	1	0.952,0.96,1.0	0.927,0.936,0.929	239	149	32,39,32	1,1,0	61,47,42	3,2,2
A3SS2777	ENSG00000198758.10_2	EPS8L3	chr1	-	110301145	110301288	110301145	110301285	110301683	110301739	0.021	0.640309	1	0.567,0.109,0.329	0.265,0.37,0.308	152	149	4,2,5	3,16,10	7,12,5	19,20,11
A3SS2778	ENSG00000198758.10_2	EPS8L3	chr1	-	110301145	110301288	110301145	110301285	110301859	110302009	-0.5	1	1	0.0,0.0,NA	0.0,NA,1.0	152	149	0,0,0	1,1,0	0,0,1	1,0,0
A3SS2779	ENSG00000198758.10_2	EPS8L3	chr1	-	110302299	110302520	110302299	110302458	110304116	110304181	0.157	0.14658	0.609867	0.04,0.414,0.191	0.045,0.042,0.086	211	149	1,3,3	17,3,9	1,1,2	15,16,15
A3SS2781	ENSG00000172534.13_2	HCFC1	chrX	-	153217291	153217612	153217291	153217609	153217964	153218409	-0.068	0.0130649	0.115179	0.065,0.046,0.123	0.21,0.126,0.103	152	149	6,4,11	84,81,77	19,11,10	70,75,85
A3SS2782	ENSG00000172534.13_2	HCFC1	chrX	-	153217964	153218541	153217964	153218409	153219057	153219221	0.128	0.000967045	0.0173907	0.386,0.259,0.274	0.126,0.227,0.181	281	149	51,31,37	43,47,52	18,26,28	66,47,67
A3SS2783	ENSG00000111325.16_3	OGFOD2	chr12	+	123461147	123461314	123461200	123461314	123460357	123460414	0.101	0.180958	0.698155	0.138,0.235,0.341	0.039,0.164,0.207	202	149	5,5,7	23,12,10	1,4,6	18,15,17
A3SS2784	ENSG00000111325.16_3	OGFOD2	chr12	+	123461130	123461314	123461200	123461314	123460799	123460948	0.156	0.147784	0.612525	0.405,0.576,0.576	0.0,1.0,0.089	219	149	2,2,2	2,1,1	0,5,1	9,0,7
A3SS2785	ENSG00000111325.16_3	OGFOD2	chr12	+	123462906	123463116	123462988	123463116	123461417	123461517	0.136	0.154296	0.632253	0.368,0.537,0.622	0.392,0.296,0.431	231	149	28,18,23	31,10,9	22,15,27	22,23,23
A3SS2786	ENSG00000111325.16_3	OGFOD2	chr12	+	123462906	123463116	123462988	123463116	123462527	123462638	-0.053	1	1	0.912,1.0,0.928	1.0,1.0,1.0	231	149	16,14,20	1,0,1	17,14,17	0,0,0
A3SS2787	ENSG00000183137.14_3	CEP57L1	chr6	+	109471320	109471442	109471368	109471442	109467960	109468140	-0.07	0.0678612	0.371328	0.817,0.833,0.848	0.914,0.95,0.844	197	149	59,33,37	10,5,5	70,50,43	5,2,6
A3SS2788	ENSG00000183137.14_3	CEP57L1	chr6	+	109480420	109480665	109480471	109480665	109480227	109480305	-0.068	0.00182802	0.0275629	0.023,0.0,0.02	0.057,0.11,0.079	200	149	1,0,1	31,30,37	3,4,3	37,24,26
A3SS2791	ENSG00000156504.16_2	FAM122B	chrX	-	133903596	133906313	133903596	133905384	133915850	133915947	-0.017	0.708896	1	0.844,0.783,0.918	0.917,0.848,0.83	1078	149	468,313,404	12,12,5	477,363,528	6,9,15
A3SS2792	ENSG00000156504.16_2	FAM122B	chrX	-	133919915	133919980	133919915	133919977	133921501	133921563	-0.078	0.026952	0.19486	0.553,0.562,0.569	0.654,0.649,0.616	152	149	106,80,116	84,61,86	141,113,139	73,60,85
A3SS2794	ENSG00000141499.16_3	WRAP53	chr17	+	7604744	7604867	7604776	7604867	7604058	7604147	0.009	1	1	0.005,0.011,0.028	0.018,0.0,0.0	181	149	1,2,3	172,148,87	1,0,0	46,46,37
A3SS2795	ENSG00000124006.14_2	OBSL1	chr2	-	220415450	220415590	220415450	220415564	220416250	220416520	-0.022	0.443237	1	0.016,0.052,0.0	0.0,0.134,0.0	175	149	1,3,0	52,47,28	0,2,0	10,11,9
A3SS2796	ENSG00000169682.17_4	SPNS1	chr16	+	28992775	28992936	28992790	28992936	28990725	28990792	-0.022	0.282101	0.909635	0.021,0.009,0.0	0.014,0.031,0.05	164	149	2,1,0	85,98,77	1,2,4	66,56,69
A3SS2797	ENSG00000176700.19_2	SCAND2P	chr15	+	85181584	85181708	85181626	85181708	85180577	85180651	0.021	0.806414	1	0.384,0.265,0.238	0.044,0.342,0.438	191	149	4,6,4	5,13,10	1,4,9	17,6,9
A3SS2798	ENSG00000172893.15_3	DHCR7	chr11	-	71155038	71155261	71155038	71155165	71155900	71156004	-0.009	1	1	0.992,0.994,0.987	1.0,1.0,1.0	245	149	406,274,251	2,1,2	57,62,67	0,0,0
A3SS2799	ENSG00000166793.10_2	YPEL4	chr11	-	57413769	57414267	57413769	57413878	57414439	57414764	-0.759	3.42718e-08	3.13014e-06	0.0,0.27,0.454	1.0,1.0,1.0	538	149	0,4,6	1,3,2	3,2,3	0,0,0
A3SS2800	ENSG00000112759.16_2	SLC29A1	chr6	+	44194996	44195079	44194999	44195079	44193797	44193904	-0.091	0.552404	1	0.174,0.495,0.164	0.171,0.606,0.329	152	149	3,11,2	14,11,10	4,11,5	19,7,10
A3SS2801	ENSG00000164828.17_4	SUN1	chr7	+	892446	892589	892449	892589	892245	892304	0.019	0.607761	1	0.763,0.718,0.758	0.794,0.674,0.713	152	149	92,65,64	28,25,20	98,78,94	25,37,37
A3SS2802	ENSG00000158714.10_3	SLAMF8	chr1	+	159804973	159807039	159806874	159807039	159803051	159803159	-0.333	1	1	1.0,1.0,0.0	1.0,NA,1.0	2050	149	3,2,0	0,0,1	1,0,3	0,0,0
A3SS2803	ENSG00000136986.9_2	DERL1	chr8	-	124026388	124031545	124026388	124027825	124033686	124033739	0.084	1	1	1.0,1.0,1.0	1.0,0.748,1.0	3869	149	132,113,129	0,0,0	134,77,104	0,1,0
A3SS2804	ENSG00000136986.9_2	DERL1	chr8	-	124031434	124031545	124031434	124031485	124033686	124033739	-0.001	1	1	0.978,0.992,1.0	0.973,1.0,1.0	209	149	187,177,165	3,1,0	152,100,129	3,0,0
A3SS2805	ENSG00000124104.18_2	SNX21	chr20	+	44468960	44469097	44469086	44469097	44466906	44466999	0.657	1	1	0.351,1.0,0.619	NA,NA,0.0	275	149	1,2,3	1,0,1	0,0,0	0,0,1
A3SS2807	ENSG00000090661.11_2	CERS4	chr19	+	8315927	8316133	8315959	8316133	8275589	8275746	0.479	1	1	0.215,0.767,0.767	0.141,0.171,0.0	181	149	1,4,4	3,1,1	1,1,0	5,4,3
A3SS2808	ENSG00000090661.11_2	CERS4	chr19	+	8315927	8316133	8315993	8316133	8275589	8275746	-0.075	1	1	1.0,0.776,1.0	1.0,1.0,1.0	215	149	4,5,7	0,1,0	2,5,2	0,0,0
A3SS2809	ENSG00000090661.11_2	CERS4	chr19	+	8315959	8316133	8315993	8316133	8275589	8275746	-0.127	1	1	1.0,0.62,1.0	1.0,1.0,1.0	183	149	6,2,4	0,1,0	6,8,5	0,0,0
A3SS2815	ENSG00000213185.6_3	FAM24B	chr10	-	124609939	124610066	124609939	124610036	124615160	124615302	0.065	0.0965395	0.466856	0.848,0.922,0.811	0.753,0.804,0.829	179	149	121,85,98	18,6,19	66,74,70	18,15,12
A3SS2820	ENSG00000167646.13_4	DNAAF3	chr19	-	55670900	55671088	55670900	55670975	55671266	55671381	-0.069	0.687366	1	0.465,0.428,0.469	0.57,1.0,0.0	262	149	29,29,28	19,22,18	7,2,0	3,0,4
A3SS2821	ENSG00000167646.13_4	DNAAF3	chr19	-	55671266	55671381	55671266	55671378	55672007	55672143	0.298	1	1	0.869,0.861,0.648	0.495,NA,0.495	152	149	27,19,15	4,3,8	1,0,1	1,0,1
A3SS2826	ENSG00000082512.14_2	TRAF5	chr1	+	211533223	211533418	211533253	211533418	211529708	211529810	0.006	0.572536	1	0.047,0.0,0.085	0.028,0.067,0.018	179	149	2,0,3	34,20,27	1,2,1	29,23,46
A3SS2827	ENSG00000146350.13_3	TBC1D32	chr6	-	121436317	121436893	121436317	121436387	121447523	121447607	-0.263	1	1	0.0,NA,0.0	0.0,0.313,0.476	655	149	0,0,0	3,0,2	0,2,4	1,1,1
A3SS2828	ENSG00000146350.13_3	TBC1D32	chr6	-	121638640	121638836	121638640	121638818	121642778	121642940	-0.214	0.620564	1	0.0,0.0,0.0	0.0,0.0,0.641	167	149	0,0,0	3,5,7	0,0,2	1,6,1
A3SS2829	ENSG00000164171.10_2	ITGA2	chr5	+	52361629	52361807	52361670	52361807	52360741	52360945	0.001	1	1	0.0,0.004,0.0	0.0,0.0,0.0	190	149	0,1,0	251,182,198	0,0,0	61,60,81
A3SS2831	ENSG00000067829.18_3	IDH3G	chrX	-	153051220	153051727	153051220	153051428	153051809	153051904	-0.057	0.00376427	0.0471142	0.957,0.94,0.91	0.977,1.0,1.0	448	149	135,142,121	2,3,4	125,131,143	1,0,0
A3SS2835	ENSG00000143498.17_2	TAF1A	chr1	-	222753100	222753214	222753100	222753167	222757469	222757639	-0.009	1	1	1.0,1.0,0.973	1.0,1.0,1.0	196	149	38,40,47	0,0,1	60,66,43	0,0,0
A3SS2836	ENSG00000143498.17_2	TAF1A	chr1	-	222753100	222753232	222753100	222753167	222757469	222757639	-0.027	1	1	1.0,1.0,0.918	1.0,1.0,1.0	214	149	20,15,16	0,0,1	21,15,16	0,0,0
A3SS2837	ENSG00000143498.17_2	TAF1A	chr1	-	222753100	222753232	222753100	222753214	222757469	222757639	0.026	0.474507	1	0.14,0.087,0.141	0.12,0.047,0.122	167	149	4,3,7	22,28,38	7,3,5	46,54,32
A3SS2838	ENSG00000143498.17_2	TAF1A	chr1	-	222753100	222753232	222753100	222753214	222761784	222761907	-0.333	1	1	1.0,1.0,0.0	NA,1.0,NA	167	149	1,2,0	0,0,2	0,3,0	0,0,0
A3SS2840	ENSG00000138738.10_3	PRDM5	chr4	-	121737607	121738079	121737607	121737729	121739507	121739682	-0.014	0.536027	1	0.113,0.23,0.402	0.309,0.249,0.23	499	149	3,1,9	7,1,4	12,10,7	8,9,7
A3SS2841	ENSG00000100116.16_3	GCAT	chr22	+	38209283	38209616	38209469	38209616	38208893	38208995	0.019	0.262485	0.873455	0.04,0.053,0.021	0.033,0.0,0.025	335	149	3,2,1	32,16,21	2,0,2	26,31,34
A3SS2843	ENSG00000187741.14_3	FANCA	chr16	-	89877336	89877479	89877336	89877465	89880927	89881021	-0.013	1	1	1.0,1.0,0.962	1.0,1.0,1.0	163	149	34,27,28	0,0,1	42,33,41	0,0,0
A3SS2849	ENSG00000266714.7_4	MYO15B	chr17	+	73610279	73610441	73610327	73610441	73609785	73609858	-0.012	1	1	1.0,1.0,0.964	1.0,1.0,1.0	197	149	35,46,35	0,0,1	33,27,42	0,0,0
A3SS2850	ENSG00000266714.7_4	MYO15B	chr17	+	73620028	73620144	73620094	73620144	73619860	73619934	0.034	1	1	0.926,1.0,0.922	0.839,0.943,0.964	215	149	18,18,17	1,0,1	30,48,39	4,2,1
A3SS2851	ENSG00000266714.7_4	MYO15B	chr17	+	73621606	73621740	73621610	73621740	73621202	73621318	0.05	0.310245	0.962933	1.0,1.0,1.0	0.927,1.0,0.924	153	149	11,11,6	0,0,0	13,14,25	1,0,2
A3SS2852	ENSG00000266714.7_4	MYO15B	chr17	+	73621845	73622057	73621923	73622057	73621606	73621740	0.016	1	1	0.048,0.0,0.0	0.0,0.0,0.0	227	149	1,0,0	13,26,12	0,0,0	26,18,31
A3SS2854	ENSG00000101452.14_3	DHX35	chr20	+	37617435	37617560	37617455	37617560	37612341	37612419	0.023	0.534208	1	0.0,0.243,0.15	0.157,0.04,0.128	169	149	0,4,3	32,11,15	8,2,5	38,42,30
A3SS2856	ENSG00000167965.17_3	MLST8	chr16	+	2256031	2256215	2256061	2256215	2255454	2255513	0.408	1.41179e-05	0.000553769	0.893,0.854,0.902	0.454,0.625,0.346	179	149	10,7,11	1,1,1	6,10,7	6,5,11
A3SS2857	ENSG00000167965.17_3	MLST8	chr16	+	2256358	2256410	2256361	2256410	2256031	2256215	-0.03	0.20386	0.749147	0.957,0.901,0.883	0.963,0.932,0.936	152	149	68,74,54	3,8,7	80,70,75	3,5,5
A3SS2858	ENSG00000167965.17_3	MLST8	chr16	+	2256479	2256660	2256484	2256660	2256358	2256410	0.307	0.000143978	0.00394371	0.772,1.0,1.0	0.635,0.421,0.795	154	149	7,1,8	2,0,0	9,6,4	5,8,1
A3SS2859	ENSG00000167965.17_3	MLST8	chr16	+	2256479	2256660	2256497	2256660	2256358	2256410	-0.013	0.600277	1	0.077,0.013,0.119	0.116,0.081,0.051	167	149	7,1,8	75,68,53	9,7,5	61,71,83
A3SS2861	ENSG00000167965.17_3	MLST8	chr16	+	2256484	2256660	2256497	2256660	2256358	2256410	-0.057	0.000191936	0.00478779	0.024,0.0,0.0	0.07,0.104,0.022	162	149	2,0,0	75,68,53	5,9,2	61,71,83
A3SS2864	ENSG00000167965.17_3	MLST8	chr16	+	2257193	2257346	2257197	2257346	2257035	2257111	-0.036	0.0550841	0.316193	0.943,0.886,0.929	0.945,0.933,0.989	153	149	85,88,81	5,11,6	105,71,90	6,5,1
A3SS2865	ENSG00000167965.17_3	MLST8	chr16	+	2258210	2258614	2258450	2258614	2257193	2257346	-0.05	0.00207938	0.0298559	0.889,0.963,0.938	0.971,0.986,0.983	389	149	167,136,159	8,2,4	174,180,150	2,1,1
A3SS2866	ENSG00000175110.11_3	MRPS22	chr3	+	139065719	139065886	139065722	139065886	139062868	139063040	0.009	0.623779	1	0.865,0.846,0.819	0.804,0.849,0.849	152	149	249,196,185	38,35,40	205,212,252	49,37,44
A3SS2867	ENSG00000175110.11_3	MRPS22	chr3	+	139069818	139069902	139069872	139069902	139069020	139069164	0.015	0.200618	0.741542	0.996,0.99,1.0	0.961,0.981,1.0	203	149	373,278,262	1,2,0	305,347,299	9,5,0
A3SS2870	ENSG00000110911.14_3	SLC11A2	chr12	-	51402258	51402407	51402258	51402327	51404477	51404549	0.002	1	1	1.0,0.991,0.992	0.985,0.993,1.0	229	149	272,172,181	0,1,1	207,230,270	2,1,0
A3SS2871	ENSG00000114126.17_4	TFDP2	chr3	-	141692889	141693036	141692889	141693033	141697361	141697524	0.112	0.00332166	0.0425063	0.388,0.384,0.386	0.272,0.338,0.211	152	149	81,73,59	125,115,92	40,38,27	105,73,99
A3SS2873	ENSG00000171566.11_3	PLRG1	chr4	-	155459120	155459260	155459120	155459234	155460256	155460365	0.009	0.678564	1	0.996,0.995,0.989	0.991,0.972,0.99	175	149	300,239,221	1,1,2	251,203,242	2,5,2
A3SS2875	ENSG00000198160.14_2	MIER1	chr1	+	67394569	67394646	67394572	67394646	67391824	67391925	-0.051	1	1	0.395,NA,1.0	0.246,1.0,1.0	152	149	2,0,1	3,0,0	1,1,1	3,0,0
A3SS2876	ENSG00000164466.12_3	SFXN1	chr5	+	174936034	174936205	174936063	174936205	174919097	174919270	0.019	0.0893272	0.441689	0.976,0.974,0.961	0.955,0.971,0.927	178	149	297,309,268	6,7,9	251,160,167	10,4,11
A3SS2877	ENSG00000110931.18_3	CAMKK2	chr12	-	121707330	121707430	121707330	121707384	121708700	121708748	-0.008	1	1	0.0,0.0,0.0	0.0,0.023,0.0	195	149	0,0,0	8,4,3	0,1,0	62,32,35
A3SS2879	ENSG00000159147.17_3	DONSON	chr21	-	34956895	34957074	34956895	34957032	34958283	34958487	-0.001	1	1	0.993,1.0,1.0	1.0,0.995,1.0	191	149	179,152,130	1,0,0	237,252,208	0,1,0
A3SS2880	ENSG00000159147.17_3	DONSON	chr21	-	34958283	34958487	34958283	34958366	34959827	34959908	-0.002	1	1	1.0,1.0,0.96	0.993,1.0,0.974	270	149	189,147,131	0,0,3	255,298,203	1,0,3
A3SS2884	ENSG00000126254.11_2	RBM42	chr19	+	36123978	36124154	36123999	36124154	36122232	36122307	0.019	0.300563	0.946999	0.008,0.05,0.025	0.0,0.026,0.0	170	149	1,5,2	103,83,67	0,2,0	51,66,80
A3SS2885	ENSG00000126254.11_2	RBM42	chr19	+	36123978	36124154	36124002	36124154	36122232	36122307	0.064	1	1	0.147,0.518,0.223	NA,0.463,0.0	173	149	1,5,2	5,4,6	0,2,0	0,2,3
A3SS2886	ENSG00000126254.11_2	RBM42	chr19	+	36123999	36124154	36124002	36124154	36122232	36122307	-0.037	0.0254738	0.187096	0.953,0.953,0.916	1.0,0.97,0.963	152	149	103,83,67	5,4,6	51,66,80	0,2,3
A3SS2889	ENSG00000155957.17_3	TMBIM4	chr12	-	66532503	66532549	66532503	66532514	66539620	66539738	0.012	0.362962	1	0.994,1.0,0.992	0.982,1.0,0.967	184	149	205,187,153	1,0,1	263,219,288	4,0,8
A3SS2890	ENSG00000099330.8_2	OCEL1	chr19	+	17337783	17338008	17337802	17338008	17337501	17337678	-0.055	0.350359	1	0.099,0.05,0.056	0.029,0.069,0.273	168	149	12,6,6	97,101,90	2,3,11	59,36,26
A3SS2891	ENSG00000099330.8_2	OCEL1	chr19	+	17339239	17340024	17339611	17340024	17339064	17339118	-0.008	0.438186	1	0.032,0.049,0.043	0.059,0.029,0.059	521	149	14,20,17	121,111,108	20,7,16	91,68,73
A3SS2892	ENSG00000099330.8_2	OCEL1	chr19	+	17339611	17340028	17339817	17340028	17339064	17339118	0.028	0.553577	1	0.735,0.717,0.796	0.782,0.712,0.669	355	149	178,169,158	27,28,17	111,100,106	13,17,22
A3SS2894	ENSG00000114982.17_3	KANSL3	chr2	-	97270515	97270600	97270515	97270594	97271056	97271248	0.004	0.838857	1	0.834,0.852,0.949	0.812,0.926,0.885	155	149	47,42,58	9,7,3	18,26,24	4,2,3
A3SS2895	ENSG00000114982.17_3	KANSL3	chr2	-	97297048	97297280	97297048	97297219	97302657	97302922	-0.029	0.879618	1	0.687,0.516,0.587	0.801,0.694,0.381	210	149	31,18,20	10,12,10	17,16,13	3,5,15
A3SS2897	ENSG00000204387.12_2	C6orf48	chr6	+	31804071	31804294	31804075	31804294	31803187	31803228	-0.128	0.127018	0.554924	0.0,0.0,0.565	0.378,0.327,0.245	153	149	0,0,4	5,2,3	5,2,2	8,4,6
A3SS2898	ENSG00000204387.12_2	C6orf48	chr6	+	31804071	31804294	31804200	31804294	31803187	31803228	-0.014	0.395247	1	0.023,0.027,0.097	0.118,0.013,0.059	278	149	3,2,7	67,39,35	11,2,10	44,81,86
A3SS2899	ENSG00000204387.12_2	C6orf48	chr6	+	31804075	31804294	31804200	31804294	31803187	31803228	-0.019	0.500716	1	0.061,0.053,0.085	0.148,0.026,0.081	274	149	8,4,6	67,39,35	14,4,14	44,81,86
A3SS2901	ENSG00000154814.13_3	OXNAD1	chr3	+	16312435	16312578	16312451	16312578	16310632	16310782	0.06	0.0888779	0.440161	0.184,0.097,0.21	0.127,0.136,0.048	165	149	21,13,20	84,109,68	14,11,3	87,63,54
A3SS2902	ENSG00000154814.13_3	OXNAD1	chr3	+	16344914	16345099	16344917	16345099	16344146	16344255	-0.018	0.0507792	0.300402	0.94,0.983,0.98	0.991,0.967,1.0	152	149	112,117,100	7,2,2	113,90,97	1,3,0
A3SS2903	ENSG00000267740.5_4	AC024592.3	chr19	-	5896463	5896661	5896463	5896586	5896915	5897008	0.009	0.0778865	0.405384	0.045,0.02,0.026	0.015,0.032,0.017	224	149	30,11,15	421,355,378	10,18,10	430,357,381
A3SS2904	ENSG00000134419.15_3	RPS15A	chr16	-	18799384	18799464	18799384	18799427	18800302	18800440	0.001	1	1	1.0,1.0,1.0	1.0,1.0,0.998	186	149	8508,8045,6806	1,3,2	9058,9362,9692	3,1,12
A3SS2905	ENSG00000134419.15_3	RPS15A	chr16	-	18799384	18799481	18799384	18799427	18800302	18800440	0.003	1	1	0.999,0.997,0.998	0.997,0.999,0.99	203	149	1358,1324,1162	1,3,2	1608,1738,1646	3,1,12
A3SS2906	ENSG00000134419.15_3	RPS15A	chr16	-	18799384	18799481	18799384	18799464	18800302	18800440	0	1	1	0.001,0.001,0.001	0.001,0.001,0.001	166	149	9,4,8	7159,6725,5652	6,11,12	7456,7635,8058
A3SS2909	ENSG00000250479.8_2	CHCHD10	chr22	-	24108314	24108483	24108314	24108462	24109560	24109780	-0.013	1	1	0.0,0.021,0.0	0.0,0.059,0.0	170	149	0,1,0	36,40,17	0,1,0	25,14,22
A3SS2910	ENSG00000092036.18_4	HAUS4	chr14	-	23417076	23417242	23417076	23417222	23419522	23419619	-0.008	0.160973	0.649774	0.011,0.014,0.024	0.036,0.017,0.019	169	149	1,1,2	78,62,72	6,3,3	142,149,135
A3SS2911	ENSG00000113272.13_2	THG1L	chr5	+	157161583	157161753	157161678	157161753	157159875	157160052	0.003	1	1	0.987,1.0,1.0	0.978,1.0,1.0	244	149	121,84,117	1,0,0	214,229,209	3,0,0
A3SS2913	ENSG00000110583.12_3	NAA40	chr11	+	63714196	63714475	63714422	63714475	63713311	63713407	-0.001	0.648234	1	0.026,0.166,0.03	0.096,0.074,0.054	375	149	1,4,1	15,8,13	4,2,2	15,10,14
A3SS2917	ENSG00000177054.13_2	ZDHHC13	chr11	+	19187848	19192115	19191957	19192115	19186598	19186692	-0.276	4.53259e-05	0.00156273	0.364,1.0,0.543	0.734,1.0,1.0	4258	149	98,51,102	6,0,3	79,73,117	1,0,0
A3SS2918	ENSG00000114742.13_3	WDR48	chr3	+	39107281	39107380	39107301	39107380	39104540	39104681	-0.004	1	1	0.0,0.0,0.0	0.0,0.0,0.013	169	149	0,0,0	94,65,72	0,0,1	67,69,69
A3SS2919	ENSG00000114742.13_3	WDR48	chr3	+	39108217	39108366	39108236	39108366	39108038	39108121	-0.004	1	1	0.012,0.0,0.0	0.0,0.0,0.023	168	149	1,0,0	72,51,83	0,0,2	88,70,74
A3SS2920	ENSG00000100441.9_2	KHNYN	chr14	+	24905273	24905385	24905277	24905385	24902141	24902238	-0.031	0.0708384	0.380783	0.0,0.054,0.035	0.032,0.115,0.035	153	149	0,2,1	24,34,27	2,6,2	59,45,54
A3SS2921	ENSG00000125503.12_2	PPP1R12C	chr19	-	55604150	55604236	55604150	55604233	55604383	55604444	-0.065	0.164888	0.658671	0.374,0.326,0.31	0.348,0.461,0.397	152	149	56,36,39	92,73,85	37,41,45	68,47,67
A3SS2922	ENSG00000125503.12_2	PPP1R12C	chr19	-	55606812	55606971	55606812	55606968	55607234	55607308	0.1	0.316346	0.972275	0.391,0.728,0.573	0.544,0.329,0.518	152	149	17,30,26	26,11,19	28,12,23	23,24,21
A3SS2923	ENSG00000109819.8_2	PPARGC1A	chr4	-	23825902	23826007	23825902	23825976	23826085	23826131	0.088	0.00456793	0.0545696	0.249,0.094,0.171	0.249,0.0,0.0	180	149	8,3,4	20,24,16	2,0,0	5,5,3
A3SS2924	ENSG00000140525.17_4	FANCI	chr15	+	89824995	89826481	89826366	89826481	89824400	89824531	0.019	0.19304	0.726602	0.874,1.0,1.0	1.0,0.885,0.933	1520	149	142,82,222	2,0,0	240,236,285	0,3,2
A3SS2925	ENSG00000140525.17_4	FANCI	chr15	+	89849237	89849425	89849240	89849425	89848835	89848929	0.008	0.95257	1	0.996,0.994,0.989	0.976,0.985,0.994	152	149	244,159,187	1,1,2	296,260,356	7,4,2
A3SS2926	ENSG00000168297.15_2	PXK	chr3	+	58398627	58398690	58398630	58398690	58395816	58395886	-0.184	0.0133717	0.117121	0.588,0.662,0.755	0.919,0.846,0.793	152	149	16,12,22	11,6,7	23,28,43	2,5,11
A3SS2927	ENSG00000273559.4_2	CWC25	chr17	-	36969047	36969117	36969047	36969113	36971113	36971350	0.001	1	1	0.979,1.0,1.0	1.0,0.976,1.0	153	149	98,70,96	2,0,0	91,85,82	0,2,0
A3SS2928	ENSG00000241370.5_3	RPP21	chr6	+	30313243	30313350	30313267	30313350	30313074	30313175	-0.024	0.00722898	0.0765762	0.017,0.006,0.016	0.012,0.051,0.049	173	149	5,2,5	254,280,258	3,9,8	214,145,134
A3SS2929	ENSG00000196924.14_2	FLNA	chrX	-	153581368	153581589	153581368	153581572	153581663	153581825	0	1	1	0.001,0.0,0.0	0.0,0.0,0.0	166	149	2,1,0	1920,1874,1558	1,1,0	2748,2324,2254
A3SS2930	ENSG00000196924.14_2	FLNA	chrX	-	153593503	153593627	153593503	153593625	153593716	153593854	-0.001	1	1	1.0,0.997,1.0	1.0,1.0,1.0	151	149	972,781,699	0,2,0	1241,1141,1175	0,0,0
A3SS2935	ENSG00000121900.18_2	TMEM54	chr1	-	33361155	33361344	33361155	33361245	33361510	33361570	-0.055	0.00573265	0.0640559	0.879,0.923,0.912	0.957,0.964,0.959	248	149	133,159,121	11,8,7	148,134,117	4,3,3
A3SS2936	ENSG00000121900.18_2	TMEM54	chr1	-	33361155	33361344	33361155	33361245	33363726	33363920	-0.009	1	1	0.971,0.973,1.0	0.97,1.0,1.0	248	149	55,60,43	1,1,0	53,55,47	1,0,0
A3SS2937	ENSG00000160703.15_2	NLRX1	chr11	+	119053826	119054725	119054529	119054725	119052802	119053054	0.062	1	1	1.0,1.0,1.0	0.814,1.0,1.0	852	149	16,23,29	0,0,0	50,37,38	2,0,0
A3SS2945	ENSG00000069943.9_2	PIGB	chr15	+	55613467	55613588	55613470	55613588	55612472	55612608	0.018	1	1	0.039,0.0,0.052	0.036,0.0,0.0	152	149	1,0,1	24,24,18	1,0,0	26,31,34
A3SS2948	ENSG00000099817.11_2	POLR2E	chr19	-	1086577	1088719	1086577	1086987	1089470	1089550	-0.017	0.504636	1	0.96,0.97,1.0	1.0,1.0,0.982	1881	149	900,803,618	3,2,0	538,578,673	0,0,1
A3SS2949	ENSG00000099817.11_2	POLR2E	chr19	-	1089470	1089572	1089470	1089550	1089882	1089961	0	1	1	0.0,0.0,0.004	0.0,0.0,0.003	171	149	0,0,1	324,284,237	0,0,1	232,257,265
A3SS2951	ENSG00000067141.16_2	NEO1	chr15	+	73528627	73528847	73528687	73528847	73470647	73470768	0.008	0.829427	1	0.762,0.884,0.671	0.588,1.0,0.704	209	149	45,32,20	10,3,7	8,11,10	4,0,3
A3SS2953	ENSG00000115970.18_3	THADA	chr2	-	43778927	43779064	43778927	43779061	43779342	43779478	-0.024	0.851777	1	1.0,1.0,0.861	1.0,0.932,1.0	152	149	19,12,19	0,0,3	30,28,30	0,2,0
A3SS2956	ENSG00000185864.16_3	NPIPB4	chr16	-	21854706	21854902	21854706	21854851	21855014	21855114	0	1	1	1.0,1.0,0.968	1.0,0.969,1.0	200	149	53,30,80	0,0,2	97,85,98	0,2,0
A3SS2958	ENSG00000162755.13_2	KLHDC9	chr1	+	161069368	161069586	161069387	161069586	161069135	161069295	-0.094	0.160884	0.649774	0.0,0.0,0.307	0.112,0.347,0.129	168	149	0,0,3	6,5,6	1,3,1	7,5,6
A3SS2960	ENSG00000090372.14_2	STRN4	chr19	-	47230708	47230824	47230708	47230803	47231150	47231264	-0.001	0.872878	1	0.238,0.132,0.24	0.195,0.165,0.254	170	149	10,4,9	28,23,25	26,14,26	94,62,67
A3SS2961	ENSG00000090372.14_2	STRN4	chr19	-	47230708	47230948	47230708	47230803	47231150	47231264	0.176	1.19284e-08	1.23979e-06	0.266,0.209,0.233	0.056,0.054,0.07	294	149	20,12,15	28,23,25	11,7,10	94,62,67
A3SS2962	ENSG00000090372.14_2	STRN4	chr19	-	47230708	47230948	47230708	47230824	47231150	47231264	0.393	9.8009e-07	5.58445e-05	0.522,0.667,0.503	0.148,0.201,0.164	273	149	20,11,13	10,3,7	7,6,9	22,13,25
A3SS2963	ENSG00000090372.14_2	STRN4	chr19	-	47231150	47231383	47231150	47231264	47231874	47232034	0.096	6.29807e-09	6.95744e-07	0.13,0.085,0.11	0.005,0.006,0.025	268	149	11,5,8	41,30,36	1,1,4	105,96,86
A3SS2964	ENSG00000101247.17_3	NDUFAF5	chr20	+	13773805	13773873	13773825	13773873	13769234	13769298	0.03	0.64705	1	0.099,0.306,0.144	0.085,0.186,0.188	169	149	6,13,9	48,26,47	4,7,10	38,27,38
A3SS2965	ENSG00000101247.17_3	NDUFAF5	chr20	+	13782131	13782329	13782153	13782329	13779106	13779146	-0.021	0.499763	1	0.986,1.0,0.929	0.978,1.0,1.0	171	149	82,67,60	1,0,4	50,42,54	1,0,0
A3SS2966	ENSG00000105325.13_2	FZR1	chr19	+	3532414	3532648	3532574	3532648	3531908	3532093	-0.027	0.617911	1	0.977,1.0,0.943	1.0,1.0,1.0	309	149	90,60,68	1,0,2	49,26,58	0,0,0
A3SS2967	ENSG00000234741.7_3	GAS5	chr1	-	173833038	173833442	173833038	173833213	173833812	173833842	0.03	0.911056	1	1.0,1.0,1.0	0.909,1.0,1.0	378	149	44,55,50	0,0,0	126,98,143	5,0,0
A3SS2968	ENSG00000234741.7_3	GAS5	chr1	-	173833394	173833842	173833394	173833442	173834366	173834420	0.001	1	1	1.0,1.0,0.996	1.0,0.994,1.0	549	149	1063,924,942	0,0,1	2050,1974,2274	0,3,0
A3SS2969	ENSG00000234741.7_3	GAS5	chr1	-	173833621	173833842	173833621	173833644	173834366	173834420	0.002	1	1	1.0,1.0,1.0	1.0,1.0,0.994	347	149	1040,900,895	0,0,0	1956,1887,2188	0,0,6
A3SS2970	ENSG00000234741.7_3	GAS5	chr1	-	173833394	173833842	173833394	173833442	173834608	173834685	-0.142	1.30306e-07	1.00764e-05	1.0,0.693,0.881	1.0,1.0,1.0	549	149	90,83,137	0,10,5	272,217,258	0,0,0
A3SS2971	ENSG00000234741.7_3	GAS5	chr1	-	173833394	173834420	173833394	173833442	173834608	173834685	-0.043	0.000459211	0.00959734	1.0,0.914,0.958	1.0,1.0,1.0	1127	149	934,800,868	0,10,5	1998,1793,2000	0,0,0
A3SS2972	ENSG00000234741.7_3	GAS5	chr1	-	173833394	173834420	173833394	173833842	173834608	173834685	0.002	1	1	0.989,1.0,1.0	1.0,0.994,0.989	727	149	854,727,741	2,0,0	1735,1587,1753	0,2,4
A3SS2973	ENSG00000234741.7_3	GAS5	chr1	-	173833394	173834420	173833394	173833442	173834994	173835032	0.007	1	1	1.0,1.0,1.0	1.0,0.98,1.0	1127	149	167,129,250	0,0,0	486,374,441	0,1,0
A3SS2974	ENSG00000234741.7_3	GAS5	chr1	-	173834366	173834685	173834366	173834420	173834994	173835032	-0.002	1	1	0.995,1.0,1.0	1.0,1.0,1.0	414	149	1063,950,933	2,0,0	2190,2122,2241	0,0,0
A3SS2975	ENSG00000234741.7_3	GAS5	chr1	-	173834994	173835344	173834994	173835032	173835665	173835705	-0.005	1	1	0.991,0.988,1.0	0.999,0.996,1.0	461	149	1337,1300,1205	4,5,0	2488,2604,3039	1,3,0
A3SS2976	ENSG00000234741.7_3	GAS5	chr1	-	173835665	173835934	173835665	173835705	173836128	173836181	-0.002	1	1	0.998,0.992,1.0	0.997,1.0,1.0	378	149	1043,1007,913	1,3,0	1730,1956,2378	2,0,0
A3SS2977	ENSG00000011243.17_3	AKAP8L	chr19	-	15509440	15509577	15509440	15509514	15510112	15510221	-0.129	0.174589	0.684324	0.513,0.738,0.778	1.0,0.738,0.678	212	149	3,4,5	2,1,1	10,8,3	0,2,1
A3SS2978	ENSG00000011243.17_3	AKAP8L	chr19	-	15511960	15512414	15511960	15512104	15514285	15514366	-0.002	1	1	0.993,1.0,1.0	1.0,1.0,1.0	459	149	410,334,307	1,0,0	302,246,297	0,0,0
A3SS2979	ENSG00000011243.17_3	AKAP8L	chr19	-	15514285	15514526	15514285	15514366	15514820	15514853	0	0.893334	1	0.963,1.0,0.98	0.958,1.0,0.985	309	149	272,242,203	5,0,2	237,201,270	5,0,2
A3SS2981	ENSG00000011243.17_3	AKAP8L	chr19	-	15514285	15514853	15514285	15514526	15521330	15521405	-0.01	1	1	1.0,1.0,0.971	1.0,1.0,1.0	476	149	281,231,211	0,0,2	186,153,196	0,0,0
A3SS2983	ENSG00000006744.18_3	ELAC2	chr17	-	12899256	12900002	12899256	12899295	12901728	12901825	-0.023	1	1	1.0,1.0,0.932	1.0,1.0,1.0	856	149	199,164,157	0,0,2	116,89,121	0,0,0
A3SS2985	ENSG00000006744.18_3	ELAC2	chr17	-	12908305	12908427	12908305	12908418	12909069	12909142	-0.006	1	1	0.0,0.0,0.0	0.018,0.0,0.0	158	149	0,0,0	122,102,70	1,0,0	52,55,54
A3SS2988	ENSG00000112096.16_3	SOD2	chr6	-	160100095	160103670	160100095	160100330	160105885	160106065	-0.011	0.199345	0.739326	0.979,0.986,0.983	0.997,0.989,0.994	3489	149	8814,8262,6708	8,5,5	7395,6487,7360	1,3,2
A3SS2992	ENSG00000100284.20_3	TOM1	chr22	+	35729167	35729490	35729396	35729490	35728973	35729007	0.051	0.0316049	0.216007	0.031,0.067,0.198	0.021,0.036,0.085	378	149	2,4,15	25,22,24	1,2,4	18,21,17
A3SS2995	ENSG00000130023.15_3	ERMARD	chr6	+	170153959	170154128	170154039	170154128	170151717	170151759	0.044	1	1	1.0,1.0,1.0	1.0,0.867,1.0	229	149	13,5,9	0,0,0	17,10,15	0,1,0
A3SS2996	ENSG00000130023.15_3	ERMARD	chr6	+	170155378	170155518	170155383	170155518	170153959	170154128	0.057	0.0799137	0.4108	1.0,1.0,0.871	0.921,0.842,0.936	154	149	10,7,7	0,0,1	12,11,15	1,2,1
A3SS2997	ENSG00000140403.12_2	DNAJA4	chr15	+	78565436	78565541	78565441	78565541	78562838	78563019	0.008	1	1	1.0,1.0,1.0	1.0,1.0,0.977	154	149	45,23,48	0,0,0	78,59,44	0,0,1
A3SS2998	ENSG00000140403.12_2	DNAJA4	chr15	+	78567839	78568070	78567952	78568070	78566538	78566766	-0.027	0.647145	1	1.0,0.946,0.878	0.962,0.943,1.0	262	149	33,31,38	0,1,3	44,58,58	1,2,0
A3SS2999	ENSG00000006704.10_3	GTF2IRD1	chr7	+	73929674	73929926	73929770	73929926	73927159	73927301	0.003	0.986101	1	0.073,0.086,0.0	0.015,0.083,0.052	245	149	7,6,0	54,39,53	1,7,4	40,47,44
A3SS3000	ENSG00000006704.10_3	GTF2IRD1	chr7	+	73969722	73969824	73969767	73969824	73969503	73969553	0.112	0.0490073	0.293772	0.697,0.556,0.706	0.538,0.528,0.556	194	149	54,44,50	18,27,16	50,51,49	33,35,30
A3SS3001	ENSG00000006704.10_3	GTF2IRD1	chr7	+	74015370	74016918	74016691	74016918	74009340	74009378	-0.053	0.73688	1	1.0,0.782,1.0	1.0,1.0,0.941	1470	149	167,106,153	0,3,0	140,162,157	0,0,1
A3SS3003	ENSG00000198830.10_2	HMGN2	chr1	+	26800193	26800626	26800575	26800626	26799973	26800018	-0.003	1	1	0.985,1.0,1.0	0.997,1.0,0.997	531	149	1398,1089,1165	6,0,0	2219,2258,2463	2,0,2
A3SS3004	ENSG00000185324.21_3	CDK10	chr16	+	89760976	89761196	89761072	89761196	89760580	89760640	0.002	0.667012	1	0.033,0.028,0.145	0.088,0.06,0.052	245	149	1,1,5	18,21,18	3,2,2	19,19,22
A3SS3005	ENSG00000185324.21_3	CDK10	chr16	+	89762002	89762762	89762136	89762762	89761700	89761753	0.035	0.337916	1	0.906,0.9,0.923	0.861,0.938,0.826	283	149	91,68,91	5,4,4	94,114,72	8,4,8
A3SS3007	ENSG00000104960.15_2	PTOV1	chr19	+	50363242	50363440	50363312	50363440	50361805	50361910	0.027	0.0429241	0.266149	0.996,1.0,0.994	0.952,0.981,0.975	219	149	366,278,244	1,0,1	174,150,175	6,2,3
A3SS3008	ENSG00000104960.15_2	PTOV1	chr19	+	50363242	50363440	50363350	50363440	50361805	50361910	0.003	0.8382	1	0.985,0.966,0.965	0.977,0.98,0.949	257	149	452,340,329	4,7,7	216,173,225	3,2,7
A3SS3009	ENSG00000104960.15_2	PTOV1	chr19	+	50363312	50363440	50363350	50363440	50361805	50361910	0.011	0.798441	1	0.945,0.876,0.907	0.927,0.909,0.858	187	149	87,62,86	4,7,7	48,25,53	3,2,7
A3SS3010	ENSG00000104960.15_2	PTOV1	chr19	+	50363822	50363997	50363870	50363997	50363524	50363593	0.002	0.833959	1	0.228,0.239,0.153	0.23,0.153,0.232	197	149	65,69,38	166,166,159	28,23,36	71,96,90
A3SS3012	ENSG00000159082.17_2	SYNJ1	chr21	-	34050954	34051120	34050954	34051111	34053805	34053958	0.027	1	1	1.0,0.93,1.0	1.0,1.0,0.85	158	149	29,14,21	0,1,0	17,15,12	0,0,2
A3SS3013	ENSG00000113389.15_3	NPR3	chr5	+	32784901	32784989	32784904	32784989	32782998	32783134	-0.197	1	1	0.677,0.551,0.424	0.495,NA,1.0	152	149	15,5,9	7,4,12	1,0,1	1,0,0
A3SS3014	ENSG00000120438.11_3	TCP1	chr6	-	160208774	160208934	160208774	160208903	160209089	160209175	-0.001	1	1	0.002,0.0,0.001	0.003,0.0,0.002	180	149	2,0,1	751,687,605	2,0,1	560,501,477
A3SS3016	ENSG00000172613.7_3	RAD9A	chr11	+	67161161	67161261	67161193	67161261	67160966	67161081	-0.037	0.176862	0.690407	0.937,0.92,0.925	1.0,0.892,1.0	181	149	18,14,15	1,1,1	30,20,24	0,2,0
A3SS3017	ENSG00000256683.6_3	ZNF350	chr19	-	52472257	52472398	52472257	52472384	52477598	52477784	-0.045	1	1	0.033,0.029,0.026	0.048,0.066,0.109	163	149	1,1,1	27,31,34	1,1,2	18,13,15
A3SS3018	ENSG00000104093.13_3	DMXL2	chr15	-	51768785	51768916	51768785	51768913	51770467	51770544	-0.009	0.656874	1	0.479,0.782,0.723	0.769,0.453,0.79	152	149	31,11,24	33,3,9	17,11,23	5,13,6
A3SS3019	ENSG00000035928.15_3	RFC1	chr4	-	39308211	39308324	39308211	39308321	39310255	39310652	-0.025	0.558006	1	0.285,0.23,0.216	0.23,0.265,0.31	152	149	50,25,30	123,82,107	38,29,45	125,79,98
A3SS3020	ENSG00000035928.15_3	RFC1	chr4	-	39308211	39308324	39308211	39308321	39313064	39313169	-0.483	1	1	0.395,0.495,0.662	1.0,1.0,NA	152	149	2,1,2	3,1,1	1,1,0	0,0,0
A3SS3021	ENSG00000035928.15_3	RFC1	chr4	-	39322002	39322289	39322002	39322280	39322906	39322994	0.003	1	1	1.0,0.993,1.0	0.994,0.995,0.995	158	149	220,157,188	0,1,0	170,209,199	1,1,1
A3SS3023	ENSG00000228630.5_3	HOTAIR	chr12	-	54359747	54359867	54359747	54359843	54360059	54360161	-0.066	0.888291	1	0.697,0.721,0.365	0.759,0.721,0.501	173	149	8,9,2	3,3,3	11,12,7	3,4,6
A3SS3024	ENSG00000228630.5_3	HOTAIR	chr12	-	54359747	54359871	54359747	54359843	54360059	54360161	0.012	0.632884	1	0.891,0.908,0.897	0.914,0.886,0.861	177	149	29,35,31	3,3,3	38,37,44	3,4,6
A3SS3025	ENSG00000228630.5_3	HOTAIR	chr12	-	54359747	54359871	54359747	54359867	54360059	54360161	0.031	0.329515	0.99631	0.886,0.904,0.967	0.883,0.854,0.928	153	149	24,29,30	3,3,1	31,30,40	4,5,3
A3SS3026	ENSG00000117054.13_3	ACADM	chr1	+	76198522	76198607	76198537	76198607	76198328	76198426	-0.002	1	1	0.0,0.0,0.0	0.003,0.004,0.0	164	149	0,0,0	235,168,189	1,1,0	328,251,230
A3SS3027	ENSG00000117054.13_3	ACADM	chr1	+	76228376	76229176	76228977	76229176	76226806	76227055	-0.041	0.000122404	0.00346896	0.914,1.0,0.922	0.978,0.991,0.991	750	149	692,479,478	13,0,8	664,575,568	3,1,1
A3SS3028	ENSG00000196150.13_3	ZNF250	chr8	-	146115317	146115459	146115317	146115444	146115692	146115788	0.294	0.00863574	0.0859287	0.672,0.577,0.366	0.254,0.132,0.348	164	149	9,6,7	4,4,11	9,4,10	24,24,17
A3SS3029	ENSG00000163902.11_3	RPN1	chr3	-	128363377	128363493	128363377	128363489	128363761	128363826	0	1	1	0.493,0.0,NA	0.493,0.0,NA	153	149	1,0,0	1,2,0	1,0,0	1,1,0
A3SS3035	ENSG00000086666.18_3	ZFAND6	chr15	+	80414053	80414162	80414089	80414162	80412669	80412840	-0.115	0	0	0.866,0.897,0.82	0.974,0.977,0.978	185	149	610,510,447	76,47,79	370,314,378	8,6,7
A3SS3036	ENSG00000180229.12_3	HERC2P3	chr15	-	20657620	20657841	20657620	20657812	20658603	20658755	0.441	0.00204991	0.0296688	0.626,1.0,0.594	0.401,0.173,0.324	178	149	4,6,7	2,0,4	4,2,4	5,8,7
A3SS3037	ENSG00000131370.15_2	SH3BP5	chr3	-	15345609	15345806	15345609	15345738	15372010	15372073	0.005	1	1	0.014,0.035,0.0	0.0,0.021,0.013	217	149	2,3,0	94,57,68	0,2,1	85,64,53
A3SS3038	ENSG00000102910.13_3	LONP2	chr16	+	48329925	48330076	48329995	48330076	48311248	48311390	-0.006	1	1	0.983,1.0,1.0	1.0,1.0,1.0	219	149	86,50,48	1,0,0	61,82,89	0,0,0
A3SS3039	ENSG00000130816.14_3	DNMT1	chr19	-	10291025	10291245	10291025	10291205	10291453	10291561	0.007	0.352822	1	0.983,0.98,0.967	0.958,0.978,0.973	189	149	145,127,113	2,2,3	174,170,135	6,3,3
A3SS3040	ENSG00000130816.14_3	DNMT1	chr19	-	10291453	10291561	10291453	10291512	10292716	10292753	-0.01	1	1	1.0,1.0,0.971	1.0,1.0,1.0	198	149	108,65,90	0,0,2	104,107,103	0,0,0
A3SS3041	ENSG00000178038.16_2	ALS2CL	chr3	-	46712977	46713258	46712977	46713074	46713373	46713523	-0.004	0.465983	1	0.073,0.031,0.062	0.071,0.058,0.049	333	149	3,1,4	17,14,27	18,11,11	105,80,96
A3SS3042	ENSG00000178038.16_2	ALS2CL	chr3	-	46717107	46717466	46717107	46717176	46717734	46717892	0.152	0.10459	0.489308	0.595,0.505,0.731	0.436,0.462,0.477	439	149	13,9,16	3,3,2	73,48,51	32,19,19
A3SS3043	ENSG00000178038.16_2	ALS2CL	chr3	-	46722989	46723088	46722989	46723063	46723518	46723584	0.062	0.00414217	0.0503856	1.0,0.461,1.0	0.861,0.8,0.613	174	149	8,2,9	0,2,0	65,42,24	9,9,13
A3SS3044	ENSG00000137312.14_2	FLOT1	chr6	-	30698458	30698877	30698458	30698504	30707934	30708087	-0.001	1	1	1.0,0.997,1.0	1.0,1.0,1.0	522	149	1336,1147,956	0,1,0	1216,964,1077	0,0,0
A3SS3045	ENSG00000137312.14_2	FLOT1	chr6	-	30708966	30709481	30708966	30709110	30709568	30709644	-0.038	0.128982	0.560337	0.907,0.843,0.899	0.921,0.913,0.929	520	149	410,243,312	12,13,10	283,293,411	7,8,9
A3SS3048	ENSG00000075043.18_3	KCNQ2	chr20	-	62070950	62071143	62070950	62071061	62073758	62073884	-0.021	1	1	0.0,0.0,0.019	0.0,0.055,NA	231	149	0,0,1	29,21,34	0,1,0	3,11,0
A3SS3049	ENSG00000119185.12_2	ITGB1BP1	chr2	-	9546789	9547727	9546789	9547034	9548241	9548334	-0.299	4.57412e-14	1.30314e-11	0.501,0.529,0.5	0.766,0.897,0.764	842	149	691,521,532	122,82,94	556,442,475	30,9,26
A3SS3051	ENSG00000111581.9_3	NUP107	chr12	+	69084382	69084526	69084410	69084526	69083312	69083399	-0.016	0.0401355	0.256205	0.014,0.01,0.01	0.035,0.028,0.02	177	149	2,1,1	121,85,87	6,5,4	139,144,163
A3SS3052	ENSG00000111581.9_3	NUP107	chr12	+	69090598	69090702	69090630	69090702	69085747	69085892	0.001	1	1	1.0,0.984,1.0	1.0,1.0,0.98	181	149	87,77,63	0,1,0	136,95,119	0,0,2
A3SS3054	ENSG00000130713.15_3	EXOSC2	chr9	+	133577520	133577697	133577544	133577697	133576253	133576322	0.005	1	1	1.0,1.0,1.0	0.994,0.997,0.993	173	149	228,220,237	0,0,0	376,347,354	2,1,2
A3SS3055	ENSG00000166816.13_3	LDHD	chr16	-	75147863	75148132	75147863	75148063	75148423	75148583	0.062	1	1	0.0,0.186,0.0	NA,0.0,0.0	218	149	0,1,0	2,3,3	0,0,0	0,1,1
A3SS3056	ENSG00000133316.15_3	WDR74	chr11	-	62606978	62607339	62606978	62607178	62609040	62609281	-0.049	1	1	1.0,1.0,0.852	1.0,1.0,1.0	310	149	14,7,12	0,0,1	10,11,17	0,0,0
A3SS3057	ENSG00000125386.15_4	FAM193A	chr4	+	2664564	2664718	2664570	2664718	2661538	2661781	0.001	1	1	0.942,1.0,1.0	1.0,0.939,1.0	155	149	17,12,12	1,0,0	17,16,18	0,1,0
A3SS3059	ENSG00000141542.10_2	RAB40B	chr17	-	80616366	80616589	80616366	80616438	80617455	80617533	-0.094	0.0396409	0.254539	0.888,0.955,0.874	1.0,1.0,1.0	300	149	32,43,28	2,1,2	28,44,36	0,0,0
A3SS3060	ENSG00000101197.12_2	BIRC7	chr20	+	61870709	61870962	61870763	61870962	61870513	61870585	0.169	0.00823533	0.083323	0.791,0.754,0.873	0.577,0.638,0.696	203	149	36,25,28	7,6,3	26,36,25	14,15,8
A3SS3061	ENSG00000144579.7_3	CTDSP1	chr2	+	219266833	219266938	219266836	219266938	219266286	219266435	0.014	0.898899	1	0.22,0.292,0.398	0.241,0.292,0.335	152	149	17,24,25	59,57,37	25,32,39	77,76,76
A3SS3062	ENSG00000144579.7_3	CTDSP1	chr2	+	219267733	219267850	219267757	219267850	219267071	219267128	0.004	1	1	0.014,0.011,0.012	0.015,0.009,0.0	173	149	1,1,1	61,76,71	2,1,0	117,90,92
A3SS3063	ENSG00000166483.10_2	WEE1	chr11	+	9607995	9608166	9608044	9608166	9606988	9607074	0.012	0.332291	1	0.995,0.994,1.0	0.993,0.971,0.988	198	149	515,420,344	2,2,0	582,483,530	3,11,5
A3SS3064	ENSG00000132768.13_2	DPH2	chr1	+	44436577	44436861	44436637	44436861	44436267	44436380	0.049	0.027266	0.195484	0.145,0.07,0.097	0.036,0.092,0.038	209	149	10,4,5	42,38,33	2,3,2	38,21,36
A3SS3067	ENSG00000173327.7_2	MAP3K11	chr11	-	65375111	65375287	65375111	65375168	65375392	65375541	0.008	0.535843	1	0.986,0.985,1.0	1.0,0.988,0.958	268	149	248,239,202	2,2,0	114,152,163	0,1,4
A3SS3068	ENSG00000213918.10_3	DNASE1	chr16	+	3706964	3707112	3706999	3707112	3706638	3706754	0.032	1	1	0.0,0.119,NA	0.0,0.083,0.0	184	149	0,1,0	1,6,0	0,1,0	2,9,1
A3SS3072	ENSG00000128513.14_2	POT1	chr7	-	124568868	124569053	124568868	124569050	124569847	124569879	-0.011	0.948391	1	0.623,0.534,0.649	0.599,0.662,0.577	152	149	27,14,32	16,12,17	29,24,25	19,12,18
A3SS3073	ENSG00000126351.12_2	THRA	chr17	+	38249272	38250120	38249389	38250120	38245458	38245586	0.073	0.424579	1	0.785,0.914,0.875	0.528,0.826,1.0	266	149	13,19,25	2,1,2	10,17,16	5,2,0
A3SS3074	ENSG00000111011.17_2	RSRC2	chr12	-	122992764	122992997	122992764	122992994	122995655	122995735	-0.001	0.938578	1	0.483,0.538,0.536	0.547,0.503,0.51	152	149	148,127,132	155,107,112	122,121,117	99,117,110
A3SS3075	ENSG00000111011.17_2	RSRC2	chr12	-	123003385	123003598	123003385	123003576	123005050	123005128	0.121	0.0647711	0.358467	0.735,0.643,0.513	0.472,0.489,0.567	171	149	51,29,35	16,14,29	40,33,42	39,30,28
A3SS3076	ENSG00000111011.17_2	RSRC2	chr12	-	123003385	123003598	123003385	123003576	123005931	123005975	0.018	0.119999	0.53497	0.067,0.045,0.071	0.057,0.038,0.034	171	149	21,12,19	253,223,217	14,7,8	202,155,196
A3SS3077	ENSG00000269335.5_3	IKBKG	chrX	+	153786746	153786865	153786749	153786865	153784379	153784591	-0.04	0.77144	1	0.606,0.815,0.809	0.774,0.806,0.771	152	149	11,18,13	7,4,3	21,17,24	6,4,7
A3SS3078	ENSG00000133454.15_2	MYO18B	chr22	+	26231259	26231410	26231262	26231410	26228883	26228964	0.495	1	1	0.495,NA,NA	NA,NA,0.0	152	149	1,0,0	1,0,0	0,0,0	0,0,1
A3SS3079	ENSG00000105520.10_2	PLPPR2	chr19	+	11468294	11468415	11468335	11468415	11467477	11467652	-0.017	0.460744	1	0.18,0.0,0.028	0.084,0.122,0.053	190	149	7,0,1	25,31,27	2,3,1	17,17,14
A3SS3080	ENSG00000105520.10_2	PLPPR2	chr19	+	11470207	11470396	11470282	11470396	11468335	11468415	-0.058	0.281299	0.9096	0.653,0.916,0.819	0.806,0.909,0.847	224	149	34,33,34	12,2,5	25,15,25	4,1,3
A3SS3081	ENSG00000063046.17_3	EIF4B	chr12	+	53415499	53415644	53415589	53415644	53413693	53413810	-0.003	1	1	0.001,0.001,0.003	0.007,0.003,0.003	239	149	4,3,8	2120,2024,1898	30,13,15	2589,2519,2670
A3SS3082	ENSG00000196352.14_3	CD55	chr1	+	207510037	207510754	207510673	207510754	207500096	207500182	-0.002	1	1	0.995,1.0,1.0	1.0,1.0,1.0	785	149	960,652,688	1,0,0	586,535,653	0,0,0
A3SS3083	ENSG00000125944.19_3	HNRNPR	chr1	-	23644975	23645190	23644975	23645181	23648020	23648156	-0.048	3.7135e-06	0.000176326	0.086,0.075,0.089	0.14,0.13,0.125	158	149	139,104,109	1386,1210,1049	178,145,158	1034,912,1044
A3SS3085	ENSG00000148303.16_2	RPL7A	chr9	+	136217094	136217582	136217451	136217582	136216766	136216907	0.001	1	1	1.0,1.0,1.0	1.0,1.0,0.998	506	149	5612,5029,4581	0,0,0	6283,5981,6980	0,0,4
A3SS3086	ENSG00000078403.16_3	MLLT10	chr10	+	21962278	21962848	21962569	21962848	21959377	21959633	0.013	0.580201	1	0.94,0.964,1.0	0.923,0.941,1.0	440	149	92,78,71	2,1,0	71,95,101	2,2,0
A3SS3087	ENSG00000078403.16_3	MLLT10	chr10	+	22028958	22029165	22029082	22029165	22024067	22024164	-0.015	0.462887	1	0.968,0.973,0.984	0.985,1.0,0.984	273	149	110,66,112	2,1,1	122,109,115	1,0,1
A3SS3088	ENSG00000204525.16_2	HLA-C	chr6	-	31237269	31237320	31237269	31237302	31237742	31237862	0.009	1	1	0.013,0.007,0.016	0.0,0.009,0.0	167	149	2,1,2	139,131,110	0,1,0	91,104,106
A3SS3089	ENSG00000204525.16_2	HLA-C	chr6	-	31238849	31239125	31238849	31239108	31239375	31239645	-0.003	1	1	0.993,1.0,0.998	1.0,1.0,1.0	166	149	619,618,524	4,0,1	453,358,337	0,0,0
A3SS3090	ENSG00000141736.13_3	ERBB2	chr17	+	37850933	37851434	37851240	37851434	37849513	37849578	0.427	7.4147e-05	0.00230665	1.0,0.395,1.0	0.0,0.642,0.473	456	149	1,2,7	0,1,0	0,11,11	3,2,4
A3SS3091	ENSG00000186714.12_4	CCDC73	chr11	-	32674668	32674773	32674668	32674743	32675523	32675583	0.125	1	1	1.0,NA,NA	1.0,1.0,0.625	179	149	2,0,0	0,0,0	1,1,2	0,0,1
A3SS3092	ENSG00000160209.18_2	PDXK	chr21	+	45163549	45163688	45163604	45163688	45161547	45161652	0.008	1	1	0.007,0.006,0.019	0.0,0.009,0.0	204	149	3,2,6	291,264,228	0,3,0	238,233,270
A3SS3093	ENSG00000160209.18_2	PDXK	chr21	+	45175357	45175645	45175578	45175645	45173463	45173600	0.001	1	1	0.003,0.0,0.004	0.0,0.004,0.0	370	149	2,0,2	290,279,221	0,2,0	233,205,234
A3SS3095	ENSG00000090674.15_3	MCOLN1	chr19	+	7595171	7595387	7595320	7595387	7594475	7594598	-0.03	0.549647	1	0.911,1.0,1.0	1.0,1.0,1.0	298	149	82,60,54	4,0,0	17,24,31	0,0,0
A3SS3096	ENSG00000114026.21_4	OGG1	chr3	+	9800870	9800970	9800917	9800970	9798450	9798500	0.182	1	1	0.432,NA,1.0	0.603,0.0,1.0	196	149	1,0,1	1,0,0	2,0,2	1,2,0
A3SS3097	ENSG00000197345.12_2	MRPL21	chr11	-	68663982	68664306	68663982	68664146	68665394	68665480	0.014	0.484403	1	0.014,0.01,0.02	0.0,0.0,0.001	309	149	7,4,9	244,200,217	0,0,1	393,359,321
A3SS3098	ENSG00000139990.17_2	DCAF5	chr14	-	69584855	69584995	69584855	69584992	69585910	69585947	0.051	0.507908	1	0.831,0.729,0.855	0.812,0.755,0.696	152	149	20,11,12	4,4,2	22,22,7	5,7,3
A3SS3100	ENSG00000155506.16_3	LARP1	chr5	+	154179432	154179602	154179459	154179602	154179150	154179319	-0.004	1	1	0.996,0.985,0.982	0.992,0.991,0.993	176	149	303,234,197	1,3,3	301,254,324	2,2,2
A3SS3101	ENSG00000204936.9_2	CD177	chr19	+	43859666	43859935	43859812	43859935	43858358	43858544	-0.028	1	1	0.0,0.0,0.0	0.0,0.0,0.084	295	149	0,0,0	5,3,4	0,0,2	12,3,11
A3SS3102	ENSG00000261740.6_4	BOLA2-SMG1P6	chr16	-	29458122	29458347	29458122	29458243	29465336	29465434	-0.064	0.0832358	0.422264	0.277,0.267,0.264	0.361,0.386,0.253	253	149	87,63,67	134,102,110	90,78,50	94,73,87
A3SS3105	ENSG00000186166.8_2	CCDC84	chr11	+	118885997	118886149	118886016	118886149	118885703	118885793	-0.005	1	1	0.0,0.016,0.0	0.011,0.014,0.006	168	149	0,3,0	193,160,169	2,2,1	153,126,142
A3SS3107	ENSG00000112983.17_3	BRD8	chr5	-	137502206	137502416	137502206	137502299	137503622	137503767	-0.012	0.591	1	0.964,0.929,0.907	0.917,0.951,0.969	266	149	95,70,87	2,3,5	79,104,111	4,3,2
A3SS3108	ENSG00000112983.17_3	BRD8	chr5	-	137504910	137505047	137504910	137505038	137506033	137506098	0.009	1	1	1.0,1.0,1.0	0.973,1.0,1.0	158	149	121,90,83	0,0,0	77,76,103	2,0,0
A3SS3110	ENSG00000167881.14_1	SRP68	chr17	-	74066458	74066525	74066458	74066517	74068388	74068588	0.002	1	1	1.0,1.0,1.0	1.0,0.995,1.0	157	149	277,248,181	0,0,0	268,225,246	0,1,0
A3SS3111	ENSG00000258947.6_3	TUBB3	chr16	+	89999522	89999775	89999546	89999775	89998978	89999087	-0.537	1	1	NA,0.463,NA	1.0,NA,NA	173	149	0,1,0	0,1,0	1,0,0	0,0,0
A3SS3112	ENSG00000100023.18_3	PPIL2	chr22	+	22049682	22049785	22049686	22049785	22049225	22049359	-0.055	1	1	0.953,0.854,0.961	1.0,0.955,0.977	153	149	21,18,25	1,3,1	14,22,44	0,1,1
A3SS3127	ENSG00000184465.15_3	WDR27	chr6	-	170068077	170068281	170068077	170068191	170070664	170070789	-0.238	0.304048	0.950786	0.294,0.0,0.789	0.789,0.714,0.294	239	149	2,0,6	3,1,1	6,4,2	1,1,3
A3SS3128	ENSG00000108349.16_3	CASC3	chr17	+	38323623	38323865	38323750	38323865	38323049	38323114	-0.025	0.00508141	0.0587728	0.015,0.012,0.035	0.045,0.022,0.071	276	149	4,3,8	145,134,118	12,6,16	138,141,113
A3SS3129	ENSG00000085644.13_2	ZNF213	chr16	+	3188354	3188542	3188418	3188542	3187166	3187680	0.191	0.0959078	0.464771	0.412,0.483,0.695	0.412,0.286,0.318	213	149	5,8,13	5,6,4	11,4,4	11,7,6
A3SS3131	ENSG00000189144.13_2	ZNF573	chr19	-	38262203	38262336	38262203	38262330	38264300	38264391	-0.126	0.25742	0.860556	1.0,0.771,0.852	1.0,1.0,1.0	155	149	10,7,12	0,2,2	13,16,21	0,0,0
A3SS3132	ENSG00000111653.19_3	ING4	chr12	-	6761436	6761584	6761436	6761475	6761827	6761933	-0.064	0.021106	0.164148	0.951,0.841,0.796	0.948,0.889,0.943	258	149	100,64,108	3,7,16	283,208,259	9,15,9
A3SS3133	ENSG00000111653.19_3	ING4	chr12	-	6761827	6761936	6761827	6761933	6762101	6762216	0.064	0.193725	0.726703	0.459,0.467,0.486	0.39,0.43,0.399	152	149	26,17,28	30,19,29	71,63,67	109,82,99
A3SS3134	ENSG00000111653.19_3	ING4	chr12	-	6761827	6761936	6761827	6761933	6762110	6762216	-0.247	4.49903e-05	0.00156111	0.197,0.0,0.098	0.292,0.415,0.329	152	149	2,0,1	8,12,9	8,13,12	19,18,24
A3SS3135	ENSG00000108840.15_4	HDAC5	chr17	-	42188096	42188171	42188096	42188168	42194861	42195072	-0.01	0.808509	1	0.401,0.495,0.662	0.437,0.582,0.57	152	149	13,19,14	19,19,7	19,27,23	24,19,17
A3SS3137	ENSG00000162869.15_3	PPP1R21	chr2	+	48681694	48681880	48681733	48681880	48678146	48678215	-0.035	0.184768	0.705823	0.076,0.052,0.0	0.055,0.126,0.052	188	149	5,2,0	48,29,40	3,6,2	41,33,29
A3SS3142	ENSG00000114650.18_2	SCAP	chr3	-	47458793	47459316	47458793	47459313	47459623	47459739	-0.012	0.917853	1	0.151,0.093,0.07	0.094,0.079,0.176	152	149	6,5,2	33,48,26	4,2,5	38,23,23
A3SS3144	ENSG00000176623.11_3	RMDN1	chr8	-	87487048	87487182	87487048	87487143	87489522	87489553	-0.091	0.00160216	0.0253581	0.886,0.857,0.84	0.95,0.944,0.963	188	149	59,53,53	6,7,8	96,106,99	4,5,3
A3SS3145	ENSG00000103507.13_3	BCKDK	chr16	+	31121397	31121445	31121424	31121445	31120993	31121104	-0.018	0.706049	1	0.95,1.0,0.964	0.969,1.0,1.0	176	149	67,51,63	3,0,2	37,27,48	1,0,0
A3SS3148	ENSG00000214087.8_3	ARL16	chr17	-	79649063	79649705	79649063	79649179	79650042	79650156	-0.032	0.424018	1	0.269,0.329,0.302	0.415,0.288,0.292	675	149	100,82,96	60,37,49	122,86,84	38,47,45
A3SS3150	ENSG00000100802.14_3	C14orf93	chr14	-	23468262	23468611	23468262	23468365	23470167	23470246	-0.197	0.0501218	0.297815	0.059,0.0,0.43	0.274,0.274,0.531	395	149	1,0,4	6,2,2	2,3,6	2,3,2
A3SS3151	ENSG00000100802.14_3	C14orf93	chr14	-	23470167	23470246	23470167	23470240	23479309	23479352	-0.171	1	1	0.658,1.0,NA	1.0,1.0,1.0	155	149	2,1,0	1,0,0	1,3,2	0,0,0
A3SS3152	ENSG00000100802.14_3	C14orf93	chr14	-	23470167	23470269	23470167	23470240	23479309	23479352	-1	1	1	0.0,NA,NA	NA,NA,1.0	178	149	0,0,0	1,0,0	0,0,1	0,0,0
A3SS3155	ENSG00000141522.11_2	ARHGDIA	chr17	-	79827205	79827501	79827205	79827282	79827616	79827833	-0.012	0.755238	1	0.986,0.991,0.983	0.995,1.0,1.0	368	149	894,834,721	5,3,5	1022,832,900	2,0,0
A3SS3156	ENSG00000165912.15_3	PACSIN3	chr11	-	47204224	47204360	47204224	47204315	47204554	47204620	0.009	0.328984	0.99541	0.024,0.037,0.043	0.016,0.015,0.045	194	149	7,9,10	216,182,173	4,4,12	193,196,196
A3SS3176	ENSG00000171469.10_3	ZNF561	chr19	-	9727720	9727902	9727720	9727847	9728766	9728855	-0.108	0.000549217	0.0111764	0.0,0.0,0.041	0.079,0.091,0.196	204	149	0,0,1	28,17,17	2,3,4	17,22,12
A3SS3177	ENSG00000171469.10_3	ZNF561	chr19	-	9728296	9728444	9728296	9728434	9728766	9728855	-0.554	0.00123526	0.0207667	0.238,0.0,0.319	0.567,1.0,0.652	159	149	2,0,2	6,5,4	7,2,2	5,0,1
A3SS3178	ENSG00000171469.10_3	ZNF561	chr19	-	9728766	9728855	9728766	9728842	9730107	9730258	0.019	0.828346	1	0.857,0.936,0.917	0.796,0.94,0.917	162	149	26,16,24	4,1,2	17,17,24	4,1,2
A3SS3180	ENSG00000136451.8_3	VEZF1	chr17	-	56057963	56058165	56057963	56058147	56059233	56059297	0.036	0.220509	0.786553	0.215,0.215,0.164	0.167,0.119,0.2	167	149	27,19,16	88,62,73	27,17,21	120,112,75
A3SS3181	ENSG00000236432.7_3	AC097662.1	chr2	-	228144198	228144294	228144198	228144291	228146419	228146505	-0.338	1	1	0.662,NA,NA	NA,NA,1.0	152	149	2,0,0	1,0,0	0,0,2	0,0,0
A3SS3182	ENSG00000120709.10_2	FAM53C	chr5	+	137680513	137681298	137681084	137681298	137677497	137677555	-0.006	1	1	0.982,1.0,1.0	1.0,1.0,1.0	720	149	259,228,202	1,0,0	118,141,168	0,0,0
A3SS3183	ENSG00000188002.10_3	AC026412.1	chr5	-	1599034	1599942	1599034	1599384	1602805	1602850	-0.022	1	1	1.0,1.0,0.935	1.0,1.0,1.0	707	149	106,55,68	0,0,1	103,92,71	0,0,0
A3SS3184	ENSG00000082515.17_3	MRPL22	chr5	+	154330362	154330498	154330380	154330498	154320776	154320825	0.011	0.0746969	0.396018	0.027,0.019,0.009	0.007,0.0,0.016	167	149	12,6,3	390,277,294	2,0,6	272,247,334
A3SS3186	ENSG00000127328.21_3	RAB3IP	chr12	+	70206557	70206813	70206743	70206813	70195388	70195501	-0.088	0.0105787	0.0999247	0.915,0.868,0.791	0.9,0.937,1.0	335	149	73,59,68	3,4,8	81,67,80	4,2,0
A3SS3188	ENSG00000104980.7_3	TIMM44	chr19	-	7998973	7999126	7998973	7999123	7999949	8000030	-0.011	0.234212	0.811646	0.036,0.013,0.031	0.041,0.037,0.035	152	149	6,2,4	156,146,122	9,8,7	208,207,192
A3SS3190	ENSG00000104980.7_3	TIMM44	chr19	-	7999949	8000138	7999949	8000030	8002911	8003082	0	1	1	0.0,0.0,0.004	0.002,0.0,0.002	257	149	0,0,1	190,182,152	1,0,1	269,245,233
A3SS3192	ENSG00000204152.6	TIMM23B	chr10	+	51384298	51384357	51384324	51384357	51381438	51381532	-0.04	0.671074	1	0.46,0.63,1.0	0.719,0.773,0.719	175	149	2,4,2	2,2,0	6,4,6	2,1,2
A3SS3193	ENSG00000283486.2_3	FAM95C	chr9	-	38542308	38543153	38542308	38543052	38543235	38543360	0.14	1	1	0.544,1.0,0.544	NA,0.472,0.641	250	149	2,2,2	1,0,1	0,3,3	0,2,1
A3SS3195	ENSG00000185619.18_1	PCGF3	chr4	+	724740	724899	724758	724899	724418	724457	0.021	0.776596	1	0.0,0.049,0.035	0.022,0.0,0.0	167	149	0,4,2	58,69,49	1,0,0	40,31,25
A3SS3196	ENSG00000185619.18_1	PCGF3	chr4	+	726188	726287	726232	726287	724758	724899	0	0.352886	1	0.809,0.698,1.0	0.507,1.0,1.0	193	149	11,9,12	2,3,0	4,2,2	3,0,0
A3SS3197	ENSG00000185619.18_1	PCGF3	chr4	+	727672	728816	728719	728816	727460	727578	0.047	0.147468	0.612499	0.272,0.252,0.234	0.211,0.223,0.183	1196	149	114,73,93	38,27,38	58,53,52	27,23,29
A3SS3200	ENSG00000116641.17_3	DOCK7	chr1	-	62943370	62943505	62943370	62943496	62954604	62954736	-0.001	1	1	1.0,1.0,0.98	1.0,1.0,0.983	158	149	68,60,52	0,0,1	60,49,61	0,0,1
A3SS3202	ENSG00000130147.15_3	SH3BP4	chr2	+	235943514	235943764	235943598	235943764	235903946	235904020	0.06	0.071501	0.383583	0.913,1.0,1.0	1.0,0.786,0.947	233	149	33,24,26	2,0,0	17,23,28	0,4,1
[truncated: 3,416 more rows]

## Sheet: A5SS
#Alternative Splicing Event: A5SS #Condition pair: test vs control Column A: Track_ID, The ID of the AS event signed by rmats. Column B: Gene_ID, The database name in gene level of the AS event. Column C: Gene_Name, The gene symbol of the AS event. Column D: Chrom, The chromosome of the AS event. Column E: Strand, Strand of the AS event. Column F, G: Long_ES/EE, The start/end Base of long AS exon…
Annotation											DE Statistic							Counts
Track_ID	Gene_ID	Gene_Name	Chrom	Strand	Long_ES	Long_EE	Short_ES	Short_EE	Flanking_ES	Flanking_EE	Diff	p_value	q_value	IncLevel_test	IncLevel_control	IncFormLen	SkipFormLen	IJC_test	SJC_test	IJC_control	SJC_control
A5SS59	ENSG00000104529.17_4	EEF1D	chr8	-	144663398	144663498	144663455	144663498	144663223	144663324	-0.096	0	0	0.867,0.869,0.854	0.971,0.945,0.962	206	149	923,916,810	102,100,100	1293,1318,1429	28,55,41
A5SS159	ENSG00000092841.18_4	MYL6	chr12	+	56552467	56553514	56552467	56552495	56553758	56553932	-0.286	0	0	0.582,0.589,0.562	0.864,0.85,0.876	1168	149	5586,5432,4508	511,484,449	5357,5193,5529	108,117,100
A5SS784	ENSG00000169045.17_1	HNRNPH1	chr5	-	179043869	179043959	179043899	179043959	179043126	179043219	0.142	0	0	0.967,0.97,0.974	0.826,0.844,0.814	179	149	2205,1883,2103	62,48,46	1647,1480,1501	289,228,286
A5SS785	ENSG00000169045.17_1	HNRNPH1	chr5	-	179043869	179044111	179044021	179044111	179043126	179043219	-0.16	0	0	0.74,0.684,0.719	0.858,0.878,0.888	301	149	1868,1572,1860	325,359,360	1392,1264,1280	114,87,80
A5SS847	ENSG00000140365.15_3	COMMD4	chr15	+	75630402	75630761	75630402	75630474	75630986	75631026	-0.403	0	0	0.387,0.292,0.336	0.743,0.758,0.724	436	149	190,129,129	103,107,87	363,340,322	43,37,42
A5SS868	ENSG00000203875.10_2	SNHG5	chr6	-	86387512	86387750	86387671	86387750	86387141	86387210	-0.455	0	0	0.381,0.41,0.458	0.838,0.899,0.878	308	149	168,165,143	132,115,82	300,277,328	28,15,22
A5SS1296	ENSG00000178188.14_3	SH2B1	chr16	+	28883854	28884079	28883854	28884026	28884490	28884590	0.41	0	0	0.593,0.615,0.576	0.14,0.267,0.147	202	149	71,65,81	36,30,44	25,37,22	113,75,94
A5SS1337	ENSG00000175061.17_2	LRRC75A-AS1	chr17	+	16342640	16343017	16342640	16342728	16343498	16343567	-0.207	0	0	0.203,0.166,0.191	0.414,0.399,0.369	438	149	767,580,558	1023,991,803	1619,1682,1949	781,862,1133
A5SS1740	ENSG00000249915.7_3	PDCD6	chr5	+	304291	306869	304291	304336	311407	311517	-0.654	0	0	0.091,0.068,0.116	0.96,0.601,0.677	2682	149	253,193,261	140,147,111	432,325,339	1,12,9
A5SS2011	ENSG00000197345.12_2	MRPL21	chr11	-	68660789	68660923	68660870	68660923	68660357	68660461	0.099	0	0	0.089,0.139,0.125	0.024,0.018,0.014	230	149	29,34,29	192,136,132	11,7,6	296,253,269
A5SS2237	ENSG00000117335.19_3	CD46	chr1	+	207940357	207943707	207940357	207940540	207956636	207956675	-0.401	0	0	0.347,0.326,0.33	0.729,0.719,0.758	3316	149	1559,1066,1291	132,99,118	1555,1481,1466	26,26,21
A5SS2987	ENSG00000118418.14_3	HMGN3	chr6	-	79911992	79912106	79912033	79912106	79910961	79911443	0.233	0	0	0.62,0.607,0.624	0.383,0.402,0.367	190	149	698,630,638	336,320,301	361,300,268	456,350,362
A5SS3083	ENSG00000112306.7_2	RPS12	chr6	+	133136110	133136363	133136110	133136227	133138098	133138200	-0.299	0	0	0.743,0.637,0.642	1.0,0.93,0.989	285	149	94,94,89	17,28,26	178,152,166	0,6,1
A5SS3113	ENSG00000244687.11_3	UBE2V1	chr20	-	48713019	48713357	48713208	48713357	48700665	48700791	0.031	0	0	0.04,0.045,0.045	0.013,0.013,0.01	338	149	91,72,79	954,676,733	27,27,23	933,883,1019
A5SS3419	ENSG00000007923.15_2	DNAJC11	chr1	-	6698142	6698424	6698354	6698424	6697506	6697564	0.105	0	0	0.075,0.162,0.124	0.014,0.01,0.021	361	149	25,45,42	127,96,123	7,5,9	206,198,170
A5SS3638	ENSG00000102317.17_2	RBM3	chrX	+	48433948	48434471	48433948	48434055	48434701	48434807	0.119	0	0	0.16,0.114,0.228	0.062,0.047,0.035	565	149	79,51,93	109,105,83	160,111,111	635,592,815
A5SS3692	ENSG00000092199.17_4	HNRNPC	chr14	-	21699116	21699231	21699155	21699231	21698477	21698525	0.193	0	0	0.409,0.399,0.436	0.206,0.228,0.231	188	149	1471,1354,1249	1682,1614,1279	689,674,715	2103,1805,1884
A5SS3724	ENSG00000136811.16_4	ODF2	chr9	+	131258319	131258576	131258319	131258420	131260691	131260854	0.605	0	0	0.737,0.738,0.761	0.149,0.121,0.151	305	149	86,52,104	15,9,16	49,37,42	137,131,115
A5SS3795	ENSG00000125676.19_2	THOC2	chrX	-	122754225	122754816	122754757	122754816	122753251	122753287	-0.085	0	0	0.026,0.029,0.022	0.115,0.107,0.109	681	149	37,18,25	306,133,240	86,83,97	145,152,173
A5SS4184	ENSG00000117616.17_3	RSRP1	chr1	-	25570667	25571792	25571640	25571792	25570040	25570124	-0.544	0	0	0.103,0.011,0.131	0.611,0.512,0.753	1122	149	113,14,120	131,171,106	201,166,184	17,21,8
A5SS4217	ENSG00000143569.18_3	UBAP2L	chr1	+	154207066	154207268	154207066	154207235	154207671	154207767	0.194	0	0	0.252,0.276,0.291	0.078,0.102,0.057	182	149	125,89,101	303,191,201	49,41,28	476,295,380
A5SS4385	ENSG00000012171.19_3	SEMA3B	chr3	+	50312442	50312890	50312442	50312484	50312990	50313046	-0.421	0	0	0.377,0.42,0.292	0.766,0.761,0.826	555	149	63,70,60	28,26,39	219,190,177	18,16,10
A5SS4516	ENSG00000244274.7_3	DBNDD2	chr20	+	44037440	44037676	44037440	44037578	44038571	44039250	0.129	0	0	0.161,0.143,0.173	0.023,0.029,0.038	247	149	86,61,72	270,220,208	12,12,17	307,240,261
A5SS4812	ENSG00000112695.11_3	COX7A2	chr6	-	75950838	75950981	75950891	75950981	75950016	75950101	0.056	0	0	0.061,0.066,0.07	0.008,0.011,0.01	202	149	68,67,63	767,703,617	10,13,14	892,852,1006
A5SS4879	ENSG00000122786.19_3	CALD1	chr7	+	134617738	134618828	134617738	134618141	134625842	134625988	0.251	0	0	0.296,0.272,0.314	0.045,0.036,0.049	836	149	424,272,398	180,130,155	87,61,88	332,291,302
A5SS5252	ENSG00000261040.6_2	WFDC21P	chr17	-	58162415	58162564	58162463	58162564	58160926	58161127	0.474	0	0	0.702,0.719,0.722	0.203,0.233,0.286	197	149	1158,1254,898	372,371,262	89,96,110	264,239,208
A5SS5253	ENSG00000261040.6_2	WFDC21P	chr17	-	58162415	58162564	58162473	58162564	58160926	58161127	0.374	0	0	0.931,0.951,0.926	0.55,0.552,0.584	207	149	1323,1430,1036	71,53,60	131,137,158	77,80,81
A5SS5597	ENSG00000089327.14_3	FXYD5	chr19	+	35657044	35657228	35657044	35657074	35660468	35660783	-0.084	0	0	0.978,0.882,0.888	1.0,1.0,1.0	303	149	719,593,530	8,39,33	531,452,553	0,0,0
A5SS1560	ENSG00000214078.12_3	CPNE1	chr20	-	34220084	34220307	34220232	34220307	34219866	34219947	-0.189	1.11022e-16	1.33992e-14	0.761,0.691,0.757	0.908,0.928,0.941	297	149	279,232,230	44,52,37	392,360,446	20,14,14
A5SS1970	ENSG00000130713.15_3	EXOSC2	chr9	+	133572968	133573638	133572968	133573014	133574715	133574781	-0.388	2.22045e-16	2.59052e-14	0.333,0.283,0.33	0.803,0.615,0.692	773	149	205,156,220	79,76,86	424,331,349	20,40,30
A5SS1483	ENSG00000071462.11_4	BUD23	chr7	+	73106925	73107744	73106925	73106976	73107953	73107999	-0.278	3.33067e-16	3.76043e-14	0.744,0.644,0.72	1.0,0.963,0.98	917	149	232,245,190	13,22,12	293,320,305	0,2,1
A5SS1942	ENSG00000160087.20_3	UBE2J2	chr1	-	1203112	1203372	1203241	1203372	1198725	1198766	0.136	4.44089e-16	4.85723e-14	0.143,0.19,0.182	0.042,0.032,0.033	278	149	36,48,41	116,110,99	10,9,9	122,145,140
A5SS4878	ENSG00000122786.19_3	CALD1	chr7	+	134617738	134618828	134617738	134618141	134620438	134620516	0.249	6.66134e-16	7.06506e-14	0.416,0.379,0.495	0.177,0.157,0.21	836	149	560,349,518	140,102,94	104,69,100	86,66,67
A5SS3394	ENSG00000203760.8_2	CENPW	chr6	+	126661319	126661590	126661319	126661545	126667350	126667464	0.127	9.99201e-16	1.02859e-13	0.144,0.168,0.213	0.07,0.046,0.028	194	149	64,71,75	293,271,213	25,12,9	254,190,236
A5SS5576	ENSG00000173020.10_3	GRK2	chr11	+	67048202	67048655	67048202	67048254	67048929	67049029	-0.366	2.9976e-15	2.9976e-13	0.626,0.548,0.691	0.962,1.0,1.0	550	149	105,76,91	17,17,11	94,90,98	1,0,0
A5SS1221	ENSG00000165219.21_3	GAPVD1	chr9	+	128109097	128109274	128109097	128109220	128111668	128111798	0.134	4.32987e-15	4.2096e-13	0.17,0.113,0.151	0.014,0.017,0.0	203	149	24,18,24	86,104,99	2,2,0	103,84,84
A5SS2982	ENSG00000198561.13_3	CTNND1	chr11	+	57529268	57529591	57529268	57529518	57561481	57561553	-0.221	4.996e-15	4.72595e-13	0.087,0.05,0.042	0.268,0.288,0.285	222	149	11,6,6	77,77,92	30,35,41	55,58,69
A5SS1031	ENSG00000149532.15_4	CPSF7	chr11	-	61187941	61189080	61188861	61189080	61187393	61187566	-0.362	8.10463e-15	7.46479e-13	0.192,0.213,0.202	0.549,0.636,0.509	1069	149	80,64,69	47,33,38	175,138,186	20,11,25
A5SS2527	ENSG00000101361.16_3	NOP56	chr20	+	2636579	2636860	2636579	2636680	2637046	2637195	0.363	9.21485e-15	8.26974e-13	0.761,0.614,0.584	0.328,0.303,0.24	329	149	197,102,130	28,29,42	112,113,124	104,118,178
A5SS4990	ENSG00000134291.11_2	TMEM106C	chr12	+	48359871	48360012	48359871	48359955	48360465	48360515	0.177	1.04361e-14	9.13158e-13	0.721,0.722,0.734	0.513,0.556,0.576	206	149	1052,797,752	295,222,197	492,530,633	338,306,337
A5SS1895	ENSG00000180104.15_3	EXOC3	chr5	+	464404	465387	464404	464527	465832	465960	-0.292	1.57652e-14	1.34581e-12	0.798,0.618,0.708	1.0,1.0,1.0	1009	149	161,175,148	6,16,9	285,238,218	0,0,0
A5SS2180	ENSG00000158201.9_3	ABHD3	chr18	-	19243638	19244191	19244078	19244191	19239130	19239304	-0.234	3.58602e-14	2.98835e-12	0.217,0.21,0.288	0.478,0.48,0.458	589	149	129,100,139	118,95,87	210,234,267	58,64,80
A5SS1862	ENSG00000134419.15_3	RPS15A	chr16	-	18801565	18801656	18801631	18801656	18800302	18800440	-0.103	5.32907e-14	4.23903e-12	0.135,0.113,0.136	0.233,0.234,0.226	215	149	326,261,237	1444,1424,1041	368,438,664	839,992,1574
A5SS2367	ENSG00000148291.9_2	SURF2	chr9	+	136223789	136224110	136223789	136223944	136224586	136224690	0.097	5.24025e-14	4.23903e-12	0.108,0.075,0.149	0.019,0.013,0.009	315	149	33,17,23	129,99,62	4,3,2	97,111,107
A5SS4447	ENSG00000100650.15_3	SRSF5	chr14	+	70233809	70234097	70233809	70233972	70234854	70234999	0.215	7.96918e-13	6.19825e-11	0.526,0.532,0.45	0.32,0.276,0.267	274	149	153,136,161	75,65,107	318,274,307	367,390,458
A5SS1894	ENSG00000180104.15_3	EXOC3	chr5	+	462271	462644	462271	462422	464404	465387	0.058	8.6553e-13	6.58555e-11	0.085,0.043,0.119	0.017,0.031,0.026	371	149	47,25,55	203,221,164	19,24,21	432,304,313
A5SS3851	ENSG00000134686.18_3	PHC2	chr1	-	33799690	33799893	33799785	33799893	33797875	33798005	0.146	1.25944e-12	9.37879e-11	0.951,0.945,0.941	0.779,0.771,0.848	244	149	286,251,209	9,9,8	324,231,264	56,42,29
A5SS1413	ENSG00000119125.16_2	GDA	chr9	+	74863187	74863322	74863187	74863254	74865665	74865757	0.169	1.66955e-12	1.21738e-10	0.846,0.852,0.867	0.67,0.71,0.678	217	149	344,284,295	43,34,31	352,331,335	119,93,109
A5SS1632	ENSG00000104064.16_2	GABPB1	chr15	-	50593417	50593565	50593453	50593565	50592985	50593099	0.251	1.76192e-12	1.25852e-10	0.753,0.751,0.782	0.446,0.542,0.545	185	149	189,172,160	50,46,36	114,119,140	114,81,94
A5SS2030	ENSG00000159086.14_2	PAXBP1	chr21	-	34127523	34127664	34127540	34127664	34123429	34123529	-0.237	2.50722e-12	1.75505e-10	0.025,0.054,0.154	0.299,0.28,0.366	166	149	3,5,16	105,78,79	30,23,47	63,53,73
A5SS5528	ENSG00000204498.10_2	NFKBIL1	chr6	+	31525404	31525626	31525404	31525581	31525798	31526606	0.24	4.37006e-12	2.99906e-10	0.872,0.901,0.819	0.629,0.61,0.634	194	149	142,118,94	16,10,16	84,106,122	38,52,54
A5SS845	ENSG00000156482.10_2	RPL30	chr8	-	99057170	99057627	99057574	99057627	99054872	99055003	-0.031	4.54226e-12	3.05729e-10	0.962,0.957,0.958	0.988,0.994,0.988	553	149	2793,2999,2359	30,36,28	3752,3551,3624	12,6,12
A5SS2687	ENSG00000061273.17_3	HDAC7	chr12	-	48179493	48179668	48179534	48179668	48179169	48179254	0.069	6.00164e-12	3.96335e-10	0.096,0.056,0.08	0.0,0.017,0.007	190	149	22,9,13	162,119,118	0,5,2	192,223,230
A5SS2985	ENSG00000198561.13_3	CTNND1	chr11	+	57529268	57529591	57529268	57529518	57563048	57563201	-0.27	6.16329e-12	3.99473e-10	0.075,0.032,0.034	0.343,0.314,0.294	222	149	8,2,3	66,41,57	14,15,18	18,22,29
A5SS1873	ENSG00000140525.17_4	FANCI	chr15	+	89790859	89790962	89790859	89790957	89801934	89802007	0.132	1.16582e-11	7.41887e-10	0.947,0.955,0.872	0.812,0.777,0.788	154	149	314,176,232	17,8,33	281,256,312	63,71,81
A5SS5508	ENSG00000125885.13_4	MCM8	chr20	+	5931297	5931723	5931297	5931669	5932656	5932809	0.244	1.20686e-11	7.54286e-10	0.931,0.832,0.901	0.643,0.637,0.651	203	149	165,74,124	9,11,10	76,67,61	31,28,24
A5SS130	ENSG00000186205.12_3	MARC1	chr1	+	220971215	220971407	220971215	220971356	220978393	220978455	0.115	1.46808e-11	9.01453e-10	0.176,0.174,0.202	0.058,0.068,0.081	200	149	53,34,54	185,120,159	29,27,25	351,274,212
A5SS5595	ENSG00000089327.14_3	FXYD5	chr19	+	35648323	35648520	35648323	35648404	35649246	35649303	0.031	2.09127e-11	1.26197e-09	0.035,0.046,0.058	0.015,0.015,0.015	265	149	49,51,60	770,598,548	18,18,16	687,681,578
A5SS5394	ENSG00000205581.10_2	HMGN1	chr21	-	40717755	40719218	40719172	40719218	40717071	40717200	-0.457	2.7274e-11	1.61795e-09	0.389,0.363,0.709	0.901,1.0,0.93	1566	149	127,90,205	19,15,8	476,400,418	5,0,3
A5SS2017	ENSG00000186166.8_2	CCDC84	chr11	+	118881930	118882021	118881930	118881993	118882648	118882713	-0.167	3.14062e-10	1.83203e-08	0.052,0.02,0.115	0.221,0.225,0.242	177	149	9,3,20	138,121,129	26,19,30	77,55,79
A5SS2465	ENSG00000132424.14_2	PNISR	chr6	-	99851704	99852578	99852478	99852578	99850415	99850586	-0.294	3.34444e-10	1.91894e-08	0.235,0.301,0.363	0.653,0.582,0.547	923	149	112,96,134	59,36,38	233,207,224	20,24,30
A5SS2621	ENSG00000148337.20_3	CIZ1	chr9	-	130941267	130941694	130941351	130941694	130940987	130941183	-0.186	3.64533e-10	2.05785e-08	0.132,0.149,0.179	0.376,0.291,0.352	233	149	37,30,33	156,110,97	67,50,67	71,78,79
A5SS4082	ENSG00000162923.14_2	WDR26	chr1	-	224619178	224619283	224619226	224619283	224612219	224612356	0.214	4.01507e-10	2.23059e-08	0.612,0.588,0.63	0.406,0.424,0.359	197	149	236,189,187	113,100,83	93,72,69	103,74,93
A5SS2741	ENSG00000168522.12_3	FNTA	chr8	+	42932358	42935584	42932358	42932507	42938260	42938323	0.117	4.17955e-10	2.28569e-08	0.255,0.267,0.272	0.135,0.16,0.148	3226	149	778,504,615	105,64,76	641,564,677	189,137,180
A5SS3716	ENSG00000197381.15_3	ADARB1	chr21	+	46641932	46643492	46641932	46642022	46645461	46646475	0.328	4.73399e-10	2.54907e-08	0.823,0.844,0.928	0.497,0.52,0.594	1619	149	303,176,279	6,3,2	440,459,445	41,39,28
A5SS2326	ENSG00000160271.14_3	RALGDS	chr9	-	135975882	135977149	135976906	135977149	135975654	135975769	-0.073	4.94785e-10	2.62386e-08	0.023,0.005,0.024	0.117,0.08,0.075	1173	149	10,2,10	53,51,52	26,15,23	25,22,36
A5SS169	ENSG00000275895.6_4	U2AF1L5	chr21	-	44520562	44524512	44524424	44524512	44515803	44515853	-0.199	6.33928e-10	3.24524e-08	0.88,0.704,0.818	1.0,1.0,1.0	4011	149	790,704,727	4,11,6	1057,871,834	0,0,0
A5SS461	ENSG00000211460.11_3	TSN	chr2	+	122514815	122515010	122514815	122514909	122516285	122516382	0.049	6.39775e-10	3.24524e-08	0.059,0.072,0.069	0.024,0.015,0.014	250	149	31,30,27	297,230,217	11,7,7	266,269,298
A5SS5506	ENSG00000123815.11_3	COQ8B	chr19	-	41209273	41209527	41209445	41209527	41208504	41208598	0.241	6.38297e-10	3.24524e-08	0.243,0.292,0.304	0.064,0.0,0.052	321	149	9,16,16	13,18,17	4,0,4	27,26,34
A5SS1570	ENSG00000214021.15_3	TTLL3	chr3	+	9859328	9860604	9859328	9859443	9862229	9862425	0.528	8.62166e-10	4.31083e-08	1.0,1.0,1.0	0.443,0.412,0.561	1310	149	16,4,37	0,0,0	42,37,45	6,6,4
A5SS5254	ENSG00000261040.6_2	WFDC21P	chr17	-	58162463	58162564	58162473	58162564	58160926	58161127	0.114	9.09461e-10	4.48326e-08	0.876,0.906,0.862	0.788,0.766,0.748	159	149	537,547,400	71,53,60	306,280,256	77,80,81
A5SS1855	ENSG00000204387.12_2	C6orf48	chr6	+	31802684	31802977	31802684	31802834	31803187	31803228	-0.118	1.11955e-09	5.44225e-08	0.772,0.789,0.799	0.935,0.878,0.901	292	149	378,293,328	57,40,42	625,663,961	22,47,54
A5SS4160	ENSG00000072195.14_1	SPEG	chr2	+	220307829	220308359	220307829	220307872	220309374	220309464	-0.541	1.5797e-09	7.57389e-08	0.443,0.508,0.426	1.0,1.0,1.0	636	149	17,22,19	5,5,6	12,8,15	0,0,0
A5SS3428	ENSG00000109184.14_2	DCUN1D4	chr4	+	52752733	52753410	52752733	52752804	52757925	52758017	-0.052	1.78255e-09	8.43096e-08	0.002,0.021,0.033	0.066,0.065,0.081	755	149	1,10,15	102,92,86	27,25,30	76,71,67
A5SS2301	ENSG00000163617.10_2	CCDC191	chr3	-	113723233	113723593	113723483	113723593	113721302	113721385	0.901	2.14011e-09	9.9872e-08	1.0,1.0,1.0	0.094,0.157,0.047	399	149	2,1,4	0,0,0	5,6,2	18,12,15
A5SS4038	ENSG00000115762.16_3	PLEKHB2	chr2	+	131890474	131890588	131890474	131890564	131897739	131897848	0.239	2.35188e-09	1.0831e-07	0.432,0.435,0.449	0.166,0.226,0.206	173	149	92,76,88	104,85,93	12,21,16	52,62,53
A5SS2372	ENSG00000130511.15_2	SSBP4	chr19	+	18544519	18544742	18544519	18544627	18545026	18545372	0.265	2.89933e-09	1.31788e-07	0.627,0.571,0.465	0.277,0.322,0.269	264	149	119,118,94	40,50,61	80,63,54	118,75,83
A5SS4222	ENSG00000169607.12_2	CKAP2L	chr2	-	113513553	113514791	113514469	113514791	113509843	113510051	-0.077	3.06068e-09	1.37338e-07	0.926,0.949,0.854	1.0,0.972,0.988	1065	149	1069,669,796	12,5,19	1258,979,1144	0,4,2
A5SS4599	ENSG00000110881.11_2	ASIC1	chr12	+	50474280	50474510	50474280	50474372	50474884	50474964	0.395	3.24402e-09	1.43723e-07	0.471,0.403,0.521	0.0,0.115,0.094	287	149	24,13,23	14,10,11	0,2,2	11,8,10
A5SS930	ENSG00000133030.20_3	MPRIP	chr17	+	17041229	17041743	17041229	17041389	17045940	17046079	0.178	4.94344e-09	2.16276e-07	0.401,0.459,0.451	0.267,0.262,0.247	503	149	201,166,200	89,58,72	134,120,133	109,100,120
A5SS5011	ENSG00000177646.18_3	ACAD9	chr3	+	128598471	128598860	128598471	128598684	128603495	128603589	-0.094	7.30454e-09	3.15628e-07	0.0,0.0,0.026	0.116,0.097,0.095	325	149	0,0,2	39,22,35	26,16,17	91,68,74
A5SS2639	ENSG00000179818.13_1	PCBP1-AS1	chr2	-	70310638	70310819	70310669	70310819	70286774	70286812	0.591	7.83815e-09	3.34555e-07	0.713,0.623,0.695	0.056,0.121,0.08	180	149	3,2,11	1,1,4	1,3,2	14,18,19
A5SS4380	ENSG00000166825.13_3	ANPEP	chr15	-	90348176	90348448	90348308	90348448	90347721	90347848	0.335	1.04187e-08	4.39343e-07	0.302,0.507,0.582	0.097,0.072,0.216	281	149	31,33,42	38,17,16	26,11,28	129,75,54
A5SS2665	ENSG00000167792.11_2	NDUFV1	chr11	+	67374428	67374795	67374428	67374547	67375866	67375949	0.033	1.32037e-08	5.50156e-07	0.04,0.021,0.064	0.011,0.006,0.008	397	149	16,7,17	144,123,94	13,7,10	442,442,442
A5SS50	ENSG00000038532.14_3	CLEC16A	chr16	+	11096930	11097162	11096930	11097114	11114049	11114182	0.452	1.48995e-08	6.1351e-07	0.826,0.786,0.786	0.207,0.472,0.362	197	149	44,34,34	7,7,7	9,13,6	26,11,8
A5SS3727	ENSG00000170653.18_3	ATF7	chr12	-	53937080	53937232	53937113	53937232	53931198	53931336	0.383	2.02517e-08	8.24197e-07	0.794,0.641,0.848	0.3,0.384,0.45	182	149	47,24,41	10,11,6	22,32,31	42,42,31
A5SS4946	ENSG00000105618.13_3	PRPF31	chr19	+	54631447	54631752	54631447	54631575	54632431	54632745	-0.123	2.30358e-08	9.26727e-07	0.855,0.868,0.817	1.0,1.0,0.909	326	149	168,130,147	13,9,15	238,179,153	0,0,7
A5SS1079	ENSG00000105486.13_3	LIG1	chr19	-	48623423	48624579	48624426	48624579	48622393	48622447	-0.054	2.60215e-08	1.03495e-06	0.0,0.0,0.033	0.083,0.049,0.064	1152	149	0,0,6	30,16,23	40,28,41	57,71,77
A5SS1728	ENSG00000169714.16_3	CNBP	chr3	-	128890476	128890614	128890497	128890614	128890288	128890381	-0.126	2.7342e-08	1.07525e-06	0.57,0.533,0.51	0.664,0.679,0.648	170	149	763,683,549	504,525,463	1000,955,857	444,396,408
A5SS906	ENSG00000160392.13_4	C19orf47	chr19	-	40847692	40847797	40847745	40847797	40842226	40842314	0.354	3.23026e-08	1.25621e-06	0.493,0.633,0.456	0.191,0.136,0.192	202	149	29,35,25	22,15,22	8,6,9	25,28,28
A5SS1484	ENSG00000071462.11_4	BUD23	chr7	+	73106925	73107744	73106925	73106976	73111934	73112024	-0.798	3.8446e-08	1.47869e-06	0.087,0.016,0.069	1.0,0.565,1.0	917	149	7,1,10	12,10,22	6,8,2	0,1,0
A5SS934	ENSG00000258366.7_3	RTEL1	chr20	+	62326680	62327003	62326680	62326833	62327130	62327606	0.434	4.06604e-08	1.54686e-06	0.599,0.529,0.584	0.211,0.105,0.094	319	149	16,12,24	5,5,8	8,4,2	14,16,9
A5SS3320	ENSG00000142541.16_3	RPL13A	chr19	+	49993106	49993179	49993106	49993169	49993488	49993554	0.02	4.17613e-08	1.57166e-06	0.972,0.974,0.97	0.949,0.953,0.953	159	149	4828,4571,3587	129,114,104	4729,4913,5779	239,227,266
A5SS2238	ENSG00000117335.19_3	CD46	chr1	+	207940357	207943707	207940357	207940540	207958415	207958451	-0.34	6.18845e-08	2.30421e-06	0.743,0.433,0.694	0.926,1.0,0.964	3316	149	193,119,303	3,7,6	554,534,601	2,0,1
A5SS3300	ENSG00000141756.18_4	FKBP10	chr17	+	39975781	39976301	39975781	39975927	39976520	39976713	0.067	7.32479e-08	2.69861e-06	0.071,0.104,0.145	0.037,0.032,0.051	523	149	28,27,35	104,66,59	27,32,43	201,280,227
A5SS1442	ENSG00000072756.16_2	TRNT1	chr3	+	3168703	3169702	3168703	3168973	3170697	3170872	0.377	8.40911e-08	3.06582e-06	1.0,1.0,1.0	0.358,0.617,0.895	878	149	32,17,45	0,0,0	23,38,50	7,4,1
A5SS1508	ENSG00000090621.13_3	PABPC4	chr1	-	40030094	40030214	40030142	40030214	40029507	40029594	0.18	8.58782e-08	3.0987e-06	0.822,0.748,0.697	0.577,0.543,0.608	197	149	220,177,152	36,45,50	195,237,291	108,151,142
A5SS4172	ENSG00000166004.14_4	CEP295	chr11	+	93428662	93428839	93428662	93428800	93429485	93429583	0.163	8.95197e-08	3.19713e-06	0.981,0.948,0.974	0.86,0.753,0.801	188	149	66,23,47	1,1,1	70,50,56	9,13,11
A5SS5373	ENSG00000008517.16_4	IL32	chr16	+	3117377	3117614	3117377	3117416	3117984	3118011	0.124	1.08499e-07	3.83582e-06	0.789,0.863,0.79	0.707,0.689,0.673	347	149	495,545,421	57,37,48	1018,894,796	181,173,166
A5SS3921	ENSG00000109180.14_3	OCIAD1	chr4	+	48833100	48833513	48833100	48833266	48834636	48834699	0.106	1.37733e-07	4.82065e-06	0.228,0.283,0.251	0.162,0.154,0.127	396	149	156,126,114	199,120,128	103,94,96	201,195,249
A5SS752	ENSG00000143793.12_2	C1orf35	chr1	-	228290010	228290261	228290178	228290261	228289780	228289866	-0.131	1.53351e-07	5.31415e-06	0.873,0.866,0.776	1.0,1.0,0.909	317	149	117,138,133	8,10,18	164,128,127	0,0,6
A5SS3358	ENSG00000108433.16_3	GOSR2	chr17	+	45000525	45000635	45000525	45000587	45006885	45006950	0.067	1.69965e-07	5.83212e-06	0.106,0.049,0.075	0.0,0.009,0.019	197	149	14,5,9	89,73,84	0,1,3	105,79,118
A5SS3823	ENSG00000085978.21_2	ATG16L1	chr2	+	234181611	234182423	234181611	234181698	234183321	234183424	-0.172	2.0568e-07	6.98914e-06	0.072,0.065,0.055	0.176,0.292,0.239	874	149	11,15,11	24,37,32	10,29,24	8,12,13
[truncated: 3,397 more rows]

## Sheet: MXE
#Alternative Splicing Event: MXE #Condition pair: test vs control Column A: Track_ID, The ID of the AS event signed by rmats. Column B: Gene_ID, The database name in gene level of the AS event. Column C: Gene_Name, The gene symbol of the AS event. Column D: Chrom, The chromosome of the AS event. Column E: Strand, Strand of the AS event. Column F, G: 1E_ES/EE, The start/end Base of first AS exon. …
[truncated: 7,808 more rows]

[truncated: 2 more sheets: RI, SE]
