# Supplementary material for: Transcriptome profiling of A549 non-small cell lung cancer cells in response to Trichinella spiralis muscle larvae excretory/secretory products
Source: Front Vet Sci. 2023 Jul 31;10:1208538. doi: 10.3389/fvets.2023.1208538 (PMC10433203; doi:10.3389/fvets.2023.1208538)
Supplement: Supplementary file 2 [file Table_2.XLSX]

## Sheet: gene_exp
Column A: Track_id, The database name in gene level. Column B: Gene_Name, The name of gene. Column C: Locus, The genomic coordinate of gene. Column D: Strand, The strand of gene. Column E: Gene_Type, The biological type of gene. Column F ~ K: FPKM, The FPKM of gene in samples.
Gene Information					FPKM
Track_id	Gene_Name	Locus	Strand	Gene_Type	control-1	control-2	control-3	test-1	test-2	test-3
ENSG00000000003.14_2	TSPAN6	chrX:99882106-99894988	-	protein_coding	8.60296	7.60795	7.70891	10.1172	10.4686	10.2351
ENSG00000000419.12_2	DPM1	chr20:49551404-49575092	-	protein_coding	117.281	110.583	114.574	93.5903	87.241	86.6839
ENSG00000000457.13_2	SCYL3	chr1:169818772-169863408	-	protein_coding	1.00993	1.11662	0.990301	0.774446	0.863584	0.838478
ENSG00000000460.16_4	C1orf112	chr1:169631245-169823221	+	protein_coding	5.64652	5.86637	5.67081	4.30285	4.04984	4.56523
ENSG00000001036.13_2	FUCA2	chr6:143815948-143832827	-	protein_coding	50.6484	55.6048	53.5221	56.2122	57.9293	48.6924
ENSG00000001084.10_3	GCLC	chr6:53362139-53481768	-	protein_coding	8.44129	8.40147	8.07718	9.51389	9.84046	9.12121
ENSG00000001167.14_2	NFYA	chr6:41040684-41067715	+	protein_coding	8.59719	8.89847	8.62398	15.7318	15.0679	16.9537
ENSG00000001460.17_2	STPG1	chr1:24683489-24743424	-	protein_coding	1.36376	1.37329	1.54957	1.13291	1.13169	1.08184
ENSG00000001461.16_2	NIPAL3	chr1:24742284-24799466	+	protein_coding	6.335	6.25771	6.83204	9.33497	8.15131	8.37273
ENSG00000001497.16_2	LAS1L	chrX:64732462-64754655	-	protein_coding	19.5024	18.5622	18.4328	8.55459	8.68029	7.89257
ENSG00000001617.11_2	SEMA3F	chr3:50192478-50226508	+	protein_coding	4.6387	4.43861	4.48239	7.08907	6.85175	5.70223
ENSG00000001629.9_3	ANKIB1	chr7:91875548-92030698	+	protein_coding	16.7863	16.6552	16.7888	18.7954	16.3292	19.0681
ENSG00000001630.15_3	CYP51A1	chr7:91741465-91772266	-	protein_coding	22.9205	28.2543	20.4033	43.7728	44.4452	42.5688
ENSG00000001631.15_3	KRIT1	chr7:91828283-91875480	-	protein_coding	6.0181	5.65504	4.85687	6.045	4.78185	5.85948
ENSG00000002016.17_3	RAD52	chr12:1021243-1099219	-	protein_coding	1.16677	1.16925	1.13699	0.955489	1.00373	1.11103
ENSG00000002330.13_2	BAD	chr11:64037302-64052176	-	protein_coding	11.2535	12.1374	15.1931	15.143	13.7196	10.4057
ENSG00000002549.12_2	LAP3	chr4:17578815-17609595	+	protein_coding	11.3016	10.8872	11.2514	5.77071	5.3642	5.33149
ENSG00000002586.18_3	CD99	chrX:2609220-2659350	+	protein_coding	20.8392	20.7461	18.5127	27.4775	29.7777	23.4958
ENSG00000002587.9_3	HS3ST1	chr4:11394774-11431389	-	protein_coding	0.0439512	0.0418928	0.0456162	0.503038	0.499677	0.530348
ENSG00000002746.14_3	HECW1	chr7:43152198-43605600	+	protein_coding	0.714961	0.751053	0.642808	0.343004	0.25856	0.278219
ENSG00000002822.15_3	MAD1L1	chr7:1855429-2272878	-	protein_coding	6.6056	5.70242	5.85528	4.84087	5.22185	5.26228
ENSG00000002834.17_3	LASP1	chr17:37026112-37078023	+	protein_coding	16.2881	36.6621	51.9917	18.1549	23.0318	18.0388
ENSG00000002919.14_2	SNX11	chr17:46180719-46200436	+	protein_coding	3.90024	4.51008	5.0084	6.0201	6.18639	5.5475
ENSG00000003056.3	M6PR	chr12:9092959-9102551	-	protein_coding	17.3685	19.6855	20.9697	9.20759	22.587	21.3276
ENSG00000003096.14_3	KLHL13	chrX:117031776-117251303	-	protein_coding	3.95829	3.57351	3.12885	2.95085	3.1881	2.76505
ENSG00000003137.8_2	CYP26B1	chr2:72356367-72375167	-	protein_coding	1.42744	4.68856	1.59412	22.171	20.1136	26.5675
ENSG00000003249.13_2	DBNDD1	chr16:90071273-90086536	-	protein_coding	1.02829	1.17269	1.33272	2.47972	2.56415	2.23952
ENSG00000003393.14_3	ALS2	chr2:202565277-202645912	-	protein_coding	2.44013	2.14456	2.05434	3.47337	2.89467	3.71043
ENSG00000003400.14_4	CASP10	chr2:202047604-202094129	+	protein_coding	0.361863	0.368863	0.816472	0.602038	0.601201	0.508359
ENSG00000003402.19_3	CFLAR	chr2:201980827-202041410	+	protein_coding	1.28366	1.17606	2.37345	1.61762	1.37513	2.19398
ENSG00000003436.15_3	TFPI	chr2:188328957-188430487	-	protein_coding	10.4027	9.82668	10.2768	8.77326	6.50263	7.36556
ENSG00000003509.15_2	NDUFAF7	chr2:37458774-37480546	+	protein_coding	6.69743	5.16199	5.16954	4.56705	5.25673	5.3632
ENSG00000003756.16_3	RBM5	chr3:50126341-50156454	+	protein_coding	6.82742	6.49368	6.21816	3.3738	2.65262	4.50892
ENSG00000003989.17_4	SLC7A2	chr8:17354597-17428082	+	protein_coding	2.39937	2.17223	3.72382	3.13961	6.15315	1.81978
ENSG00000004059.10_4	ARF5	chr7:127228399-127231759	+	protein_coding	21.7785	22.56	21.3036	21.9078	26.5279	19.9756
ENSG00000004139.13_3	SARM1	chr17:26691378-26731067	+	protein_coding	2.93668	2.88312	2.83005	1.3416	1.27861	1.88235
ENSG00000004142.11_2	POLDIP2	chr17:26674203-26684545	-	protein_coding	54.5691	55.9555	57.1685	51.272	51.9116	45.2384
ENSG00000004399.12_3	PLXND1	chr3:129274018-129325661	-	protein_coding	7.68716	8.38941	7.90655	9.43576	9.9081	9.84528
ENSG00000004455.16_2	AK2	chr1:33473541-33546597	-	protein_coding	47.3026	53.815	55.1773	41.9125	44.5043	39.2744
ENSG00000004478.7_2	FKBP4	chr12:2904119-2914589	+	protein_coding	21.6336	20.709	22.6471	31.6622	36.617	30.2127
ENSG00000004487.15_3	KDM1A	chr1:23345941-23410182	+	protein_coding	32.1458	30.4852	25.6862	75.5878	76.913	64.5258
ENSG00000004534.14_3	RBM6	chr3:49977440-50137478	+	protein_coding	6.94717	6.29241	6.69461	7.9792	6.98193	9.70653
ENSG00000004660.14_2	CAMKK1	chr17:3763609-3798185	-	protein_coding	3.2768	3.32276	2.93163	1.40294	1.34191	1.86696
ENSG00000004700.15_3	RECQL	chr12:21621845-21654603	-	protein_coding	23.7385	21.0639	22.4637	31.6817	24.6029	29.7504
ENSG00000004766.15_2	VPS50	chr7:92861653-92990433	+	protein_coding	3.33644	3.37203	3.52209	3.48304	2.69985	3.3203
ENSG00000004777.18_3	ARHGAP33	chr19:36265434-36279724	+	protein_coding	0.576805	0.797222	0.946504	0.230161	0.244556	0.351875
ENSG00000004779.9_2	NDUFAB1	chr16:23592323-23607677	-	protein_coding	29.0392	28.3455	25.485	35.974	47.5672	43.3944
ENSG00000004799.7_2	PDK4	chr7:95212811-95225803	-	protein_coding	11.4311	15.9862	13.769	30.6021	34.518	29.3048
ENSG00000004864.13_2	SLC25A13	chr7:95749532-95951459	-	protein_coding	13.25	13.6353	13.3993	7.53597	7.28116	8.93902
ENSG00000004866.20_3	ST7	chr7:116593292-116870157	+	protein_coding	3.9341	4.16525	3.8578	4.41475	4.17148	4.08629
ENSG00000004897.11_3	CDC27	chr17:45195069-45266788	-	protein_coding	20.9301	22.179	22.4081	23.7872	22.0738	22.7135
ENSG00000004961.14_2	HCCS	chrX:11129421-11141198	+	protein_coding	45.9438	44.6381	45.4164	46.1285	54.541	45.8792
ENSG00000004975.11_2	DVL2	chr17:7128660-7137864	-	protein_coding	9.45576	9.88386	10.5009	8.21435	8.03426	7.92146
ENSG00000005001.9_2	PRSS22	chr16:2902728-2908171	-	protein_coding	0.12797	0.0498635	0.139862	0.685015	0.557673	0.697008
ENSG00000005007.12_2	UPF1	chr19:18942747-18979045	+	protein_coding	10.509	10.2204	10.1161	12.6544	12.814	12.2613
ENSG00000005020.12_3	SKAP2	chr7:26706681-27034858	-	protein_coding	7.39429	6.40763	6.94789	9.24258	8.58114	9.06849
ENSG00000005022.5_2	SLC25A5	chrX:118602363-118605282	+	protein_coding	199.084	223.067	213.43	211.992	243.805	199.266
ENSG00000005059.15_3	MCUB	chr4:110481361-110609882	+	protein_coding	7.87269	7.05349	6.74956	6.76467	7.59255	6.37221
ENSG00000005073.5_2	HOXA11	chr7:27221129-27224842	-	protein_coding	10.3269	11.2272	10.1346	17.1137	17.6903	15.1284
ENSG00000005075.15_2	POLR2J	chr7:102113565-102119354	-	protein_coding	30.4193	34.846	38.5794	43.2626	40.571	38.939
ENSG00000005100.12_3	DHX33	chr17:5344232-5372380	-	protein_coding	12.7255	11.8333	12.1396	8.7515	8.31684	9.61205
ENSG00000005102.12_2	MEOX1	chr17:41717756-41739322	-	protein_coding	0.347109	0.549835	0.316877	5.30807	5.46717	5.78923
ENSG00000005156.11_3	LIG3	chr17:33307513-33336762	+	protein_coding	2.76981	2.87675	2.52776	1.99298	2.28645	2.43594
ENSG00000005175.9_3	RPAP3	chr12:48055032-48099844	-	protein_coding	29.581	27.823	26.3919	53.6137	46.566	53.6393
ENSG00000005187.11_3	ACSM3	chr16:20621565-20808903	+	protein_coding	1.18411	1.31879	1.10858	0.342893	0.323513	0.329624
ENSG00000005189.19_3	REXO5	chr16:20817751-20860990	+	protein_coding	1.34639	1.20625	1.41901	0.405747	0.405631	0.521682
ENSG00000005194.14_3	CIAPIN1	chr16:57462081-57481440	-	protein_coding	9.22968	9.33599	10.4614	10.0987	9.95561	10.1799
ENSG00000005206.16_1	SPPL2B	chr19:2328614-2354804	+	protein_coding	1.29059	1.53046	1.29296	0.991296	0.795621	0.986136
ENSG00000005238.19_2	FAM214B	chr9:35104109-35116338	-	protein_coding	1.82418	1.71904	2.17242	3.1409	3.19369	3.44093
ENSG00000005243.9_3	COPZ2	chr17:46103533-46115392	-	protein_coding	3.31354	2.29955	1.91827	0.976821	1.02339	1.1574
ENSG00000005249.12_2	PRKAR2B	chr7:106685094-106802256	+	protein_coding	0.0130277	0.0140633	0.0510458	1.04071	1.12382	1.00809
ENSG00000005302.17_3	MSL3	chrX:11776278-11793872	+	protein_coding	9.33188	8.20708	7.43603	10.4071	10.6634	11.3911
ENSG00000005339.14_3	CREBBP	chr16:3775055-3930727	-	protein_coding	6.0071	5.75341	5.54103	5.57602	5.24955	5.80096
ENSG00000005436.13_3	GCFC2	chr2:75879126-75938115	-	protein_coding	4.93768	4.75876	4.18478	2.21695	1.8887	2.30921
ENSG00000005448.16_2	WDR54	chr2:74648805-74652882	+	protein_coding	5.14918	5.20091	4.88337	4.59194	4.67842	4.52855
ENSG00000005469.11_2	CROT	chr7:86974997-87029111	+	protein_coding	2.42655	1.78167	2.17799	2.13251	1.99597	2.23394
ENSG00000005483.20_3	KMT2E	chr7:104654626-104754808	+	protein_coding	11.7547	10.7926	10.9289	10.408	8.15246	11.5578
ENSG00000005486.16_2	RHBDD2	chr7:75471920-75518244	+	protein_coding	4.27755	5.09405	8.69587	5.53632	5.29612	3.32475
ENSG00000005700.14_2	IBTK	chr6:82879700-82957471	-	protein_coding	11.5771	10.0912	9.4219	9.01617	7.06572	8.57326
ENSG00000005801.16_3	ZNF195	chr11:3360491-3400452	-	protein_coding	8.55313	5.63125	6.22028	6.14614	5.69755	6.78904
ENSG00000005810.17_1	MYCBP2	chr13:77618790-77901185	-	protein_coding	6.1825	5.77834	6.72207	7.65922	5.79524	7.68931
ENSG00000005812.10_3	FBXL3	chr13:77566733-77601330	-	protein_coding	18.4271	16.6595	17.361	15.8849	16.3616	15.4044
ENSG00000005882.11_4	PDK2	chr17:48172101-48189516	+	protein_coding	2.95687	3.52756	3.02415	3.81011	5.07531	3.4156
ENSG00000005884.17_2	ITGA3	chr17:48133332-48167845	+	protein_coding	14.4625	14.3302	14.6407	18.0367	17.7322	18.6984
ENSG00000005889.15_2	ZFX	chrX:24167290-24234372	+	protein_coding	9.17989	9.23792	8.86102	7.54844	6.30003	3.81555
ENSG00000005893.15_2	LAMP2	chrX:119561682-119603220	-	protein_coding	22.5739	22.252	23.9572	29.6838	27.4771	26.1968
ENSG00000006007.11_2	GDE1	chr16:19513011-19533467	-	protein_coding	21.1196	22.8305	22.1469	36.4518	37.3923	33.454
ENSG00000006015.17_3	C19orf60	chr19:18699495-18703146	+	protein_coding	3.1315	2.7846	2.69469	1.24354	1.54511	1.53495
ENSG00000006016.10_2	CRLF1	chr19:18683030-18718551	-	protein_coding	0.475749	0.528321	0.571551	3.38238	2.72145	2.74312
ENSG00000006025.11_3	OSBPL7	chr17:45884738-45899200	-	protein_coding	1.39376	1.07988	1.49403	0.782843	0.450553	0.928264
ENSG00000006047.12_2	YBX2	chr17:7191571-7197934	-	protein_coding	1.96121	1.73459	1.86414	2.23519	2.07154	3.11929
ENSG00000006062.14_2	MAP3K14	chr17:43340488-43394406	-	protein_coding	8.57335	12.1357	9.64301	5.91199	6.26503	5.69708
ENSG00000006118.14_4	TMEM132A	chr11:60691935-60704631	+	protein_coding	8.52016	8.29393	9.88438	12.5723	12.969	12.4001
ENSG00000006125.17_4	AP2B1	chr17:33905065-34053428	+	protein_coding	41.9504	44.6127	47.3805	39.6706	43.228	39.1407
ENSG00000006194.9_3	ZNF263	chr16:3313800-3351401	+	protein_coding	2.87968	2.64154	4.63231	5.39281	7.07008	4.41321
ENSG00000006282.20_3	SPATA20	chr17:48620419-48633213	+	protein_coding	4.30402	4.16134	3.7924	2.55869	2.52523	3.31112
ENSG00000006283.17_3	CACNA1G	chr17:48638429-48704835	+	protein_coding	0.0224811	0.0218701	0.0189373	0.952696	0.490456	0.941545
ENSG00000006327.13_2	TNFRSF12A	chr16:3068446-3072384	+	protein_coding	16.4489	20.3758	24.9418	33.0708	16.5046	29.5453
ENSG00000006432.15_3	MAP3K9	chr14:71189243-71276251	-	protein_coding	0.430846	1.97848	2.06848	2.16366	2.11961	2.90298
ENSG00000006451.7_3	RALA	chr7:39663082-39747723	+	protein_coding	33.4315	31.7809	32.8586	54.19	56.0125	50.2236
ENSG00000006453.13_3	BAIAP2L1	chr7:97920963-98030380	-	protein_coding	19.9607	19.1992	18.1734	15.0097	14.5038	13.9173
ENSG00000006459.10_2	KDM7A	chr7:139784546-139876835	-	protein_coding	4.24298	3.78864	4.27924	4.39354	3.76608	4.91819
ENSG00000006468.13_2	ETV1	chr7:13930853-14031050	-	protein_coding	0.436537	0.342193	0.394014	0.618134	0.532605	0.906257
ENSG00000006530.15_2	AGK	chr7:141250989-141355044	+	protein_coding	3.35556	3.03128	3.07597	1.95619	1.44359	1.91159
ENSG00000006534.15_2	ALDH3B1	chr11:67776048-67796749	+	protein_coding	5.77312	4.30191	4.17496	1.22921	1.72432	1.37733
ENSG00000006576.16_2	PHTF2	chr7:77428109-77586820	+	protein_coding	3.37892	3.41769	3.09537	3.51417	3.35768	3.4747
ENSG00000006606.8_2	CCL26	chr7:75398851-75419214	-	protein_coding	0.198406	0.315674	0.303879	24.0179	25.849	22.8316
ENSG00000006607.13_3	FARP2	chr2:242295658-242434256	+	protein_coding	2.40379	2.42001	2.26064	1.51497	1.36211	1.03076
ENSG00000006611.15_2	USH1C	chr11:17515442-17565963	-	protein_coding	0.783626	0.564853	0.526578	0.725097	0.975087	0.793635
ENSG00000006625.17_3	GGCT	chr7:30536237-30544460	-	protein_coding	45.777	39.1843	38.3401	28.1498	22.2223	25.2536
ENSG00000006634.7_2	DBF4	chr7:87505531-87538856	+	protein_coding	4.64968	4.20769	3.8398	6.28338	6.00496	6.531
ENSG00000006638.11_2	TBXA2R	chr19:3594504-3606838	-	protein_coding	1.38074	1.49087	1.12937	3.25971	1.66349	1.58451
ENSG00000006652.13_3	IFRD1	chr7:112063023-112121072	+	protein_coding	15.9058	18.5478	13.8657	11.6307	10.771	16.3142
ENSG00000006695.10_2	COX10	chr17:13972813-14111994	+	protein_coding	8.31826	8.8285	8.43319	7.52823	6.90299	6.2231
ENSG00000006704.10_3	GTF2IRD1	chr7:73868120-74016930	+	protein_coding	9.17005	9.7207	9.00824	7.78023	6.85717	8.60488
ENSG00000006712.14_3	PAF1	chr19:39876492-39881835	-	protein_coding	29.278	26.6781	24.9512	29.1255	32.159	29.3493
ENSG00000006715.15_3	VPS41	chr7:38762563-38971994	-	protein_coding	4.58653	4.55367	4.58528	4.27004	3.81222	3.65205
ENSG00000006744.18_3	ELAC2	chr17:12895708-12921504	-	protein_coding	8.70786	8.13925	8.1965	12.3184	13.8037	11.4884
ENSG00000006747.14_2	SCIN	chr7:12610203-12699804	+	protein_coding	8.82948	9.8966	8.17322	12.7854	12.8909	11.7246
ENSG00000006756.15_2	ARSD	chrX:2822011-2847392	-	protein_coding	0.749487	0.775238	0.821668	0.392531	0.354994	0.347885
ENSG00000006757.11_2	PNPLA4	chrX:7866288-7895780	-	protein_coding	3.89114	3.99002	4.43084	3.16095	3.31604	3.10613
ENSG00000006831.9_2	ADIPOR2	chr12:1797740-1897844	+	protein_coding	20.2793	20.3506	19.2801	36.6996	38.2644	33.9877
ENSG00000006837.11_3	CDKL3	chr5:133622041-133706738	-	protein_coding	0.661149	0.400695	0.64471	0.829882	0.785261	0.793596
ENSG00000007038.10_2	PRSS21	chr16:2867181-2876305	+	protein_coding	21.4093	16.8285	19.901	20.9521	21.79	19.6123
ENSG00000007047.14_3	MARK4	chr19:45582546-45808541	+	protein_coding	1.82044	1.47014	1.80711	2.89978	2.70742	2.64919
ENSG00000007080.10_2	CCDC124	chr19:18043825-18054800	+	protein_coding	42.1468	44.0979	43.5735	44.6412	47.7821	38.7586
ENSG00000007168.12_3	PAFAH1B1	chr17:2496504-2588909	+	protein_coding	19.2503	20.2843	18.2431	17.6425	21.0874	17.368
ENSG00000007202.14_3	KIAA0100	chr17:26941458-26972472	-	protein_coding	11.258	12.5714	10.9664	19.5503	19.1145	16.6216
ENSG00000007255.10_2	TRAPPC6A	chr19:45666186-45681495	-	protein_coding	2.82473	3.15333	2.51438	1.67759	1.34074	1.43273
ENSG00000007264.14_3	MATK	chr19:3777968-3802127	-	protein_coding	3.14277	3.20875	4.11801	3.65446	4.04847	3.39467
ENSG00000007312.12_2	CD79B	chr17:62006100-62009714	-	protein_coding	0.137572	0.0573204	0.0264922	1.22708	1.34211	0.890543
ENSG00000007314.12_2	SCN4A	chr17:62015914-62050278	-	protein_coding	0.454488	0.622086	0.44983	0.590492	0.510186	0.685158
ENSG00000007341.18_2	ST7L	chr1:113066140-113163447	-	protein_coding	2.39731	2.68454	2.39495	1.42066	1.22725	1.33848
ENSG00000007372.21_4	PAX6	chr11:31806327-31839610	-	protein_coding	1.22826	1.17002	1.08841	1.31784	1.34833	1.47524
ENSG00000007376.7_2	RPUSD1	chr16:834974-838397	-	protein_coding	6.09315	7.36522	6.43708	5.40113	10.0513	5.11559
ENSG00000007384.15_2	RHBDF1	chr16:108058-126354	-	protein_coding	3.01465	3.17179	2.27072	4.05935	3.98752	3.92246
ENSG00000007392.16_3	LUC7L	chr16:238968-279462	-	protein_coding	4.93922	4.91694	4.03084	4.37665	4.87167	5.96579
ENSG00000007516.13_4	BAIAP3	chr16:1383602-1399442	+	protein_coding	0.436814	0.381874	0.257654	0.933045	0.705085	1.10873
ENSG00000007520.3_2	TSR3	chr16:1399241-1401912	-	protein_coding	34.3168	31.2887	29.5709	22.3932	26.5676	22.2468
ENSG00000007541.16_1	PIGQ	chr16:616995-634136	+	protein_coding	1.17176	1.118	1.03887	1.11129	1.19414	1.23431
ENSG00000007545.15_3	CRAMP1	chr16:1662326-1727909	+	protein_coding	4.86153	3.80886	3.93424	1.03826	3.61052	3.33415
ENSG00000007866.19_4	TEAD3	chr6:35441374-35464853	-	protein_coding	11.0082	11.1731	12.1099	12.3977	12.55	11.4322
ENSG00000007923.15_2	DNAJC11	chr1:6694228-6761984	-	protein_coding	14.4023	14.3487	13.8696	9.3672	9.19997	10.9714
ENSG00000007944.14_2	MYLIP	chr6:16129356-16148479	+	protein_coding	1.24998	0.304163	0.386626	1.80942	2.10645	2.46912
ENSG00000007968.6_2	E2F2	chr1:23832922-23857712	-	protein_coding	6.92039	6.9386	5.90473	6.3376	6.23062	7.30546
ENSG00000008018.8_2	PSMB1	chr6:170844205-170862429	-	protein_coding	58.7643	60.2875	62.4908	68.5432	69.0624	70.7631
ENSG00000008083.13_2	JARID2	chr6:15246527-15522271	+	protein_coding	9.04808	7.49908	7.69695	11.9966	11.3414	13.1941
ENSG00000008086.11_3	CDKL5	chrX:18443703-18671749	+	protein_coding	0.841054	0.723807	0.136865	1.68245	1.42984	1.51768
ENSG00000008128.22_3	CDK11A	chr1:1634169-1655763	-	protein_coding	10.6975	9.39886	9.67517	9.73914	9.24203	11.5732
ENSG00000008130.15_2	NADK	chr1:1682671-1711896	-	protein_coding	12.1275	12.6706	10.4379	10.686	9.00107	12.7506
ENSG00000008256.15_2	CYTH3	chr7:6201407-6312275	-	protein_coding	6.81126	8.06444	8.25188	8.96191	9.30501	9.02675
ENSG00000008277.14_2	ADAM22	chr7:87563458-87832204	+	protein_coding	1.32595	1.12823	0.99214	2.30321	1.96331	2.6016
ENSG00000008282.8_2	SYPL1	chr7:105730949-105753022	-	protein_coding	27.9537	26.6627	36.3226	33.7315	35.9128	29.9944
ENSG00000008283.15_3	CYB561	chr17:61509665-61523739	-	protein_coding	8.27672	9.95018	8.28891	8.70376	9.44469	9.39552
ENSG00000008294.20_2	SPAG9	chr17:49039535-49198226	-	protein_coding	8.57948	7.36588	7.8276	9.6728	9.80785	9.37443
ENSG00000008300.16_3	CELSR3	chr3:48673902-48700348	-	protein_coding	1.97844	1.98301	2.16722	2.4325	2.04541	2.73799
ENSG00000008324.11_2	SS18L2	chr3:42623332-42636606	+	protein_coding	18.084	18.134	19.8114	23.9215	23.1799	22.105
ENSG00000008382.15_4	MPND	chr19:4343524-4360083	+	protein_coding	1.67756	2.24396	1.93681	3.13913	2.66324	2.62202
ENSG00000008394.12_3	MGST1	chr12:16500076-16762193	+	protein_coding	6.05445	6.30358	6.13085	4.77158	5.09956	5.00104
ENSG00000008405.11_3	CRY1	chr12:107385142-107487607	-	protein_coding	3.59118	4.05322	4.32352	12.3848	14.6775	13.4508
ENSG00000008441.16_4	NFIX	chr19:13106422-13209610	+	protein_coding	1.92635	6.20395	5.81088	2.26875	2.63942	1.09679
ENSG00000008513.14_3	ST3GAL1	chr8:134467091-134584183	-	protein_coding	5.08066	5.6753	5.17889	5.62149	6.02346	5.28067
ENSG00000008517.16_4	IL32	chr16:3115298-3132193	+	protein_coding	28.1676	26.9741	22.8342	13.9192	16.7272	12.8346
ENSG00000008710.19_3	PKD1	chr16:2138711-2185899	-	protein_coding	3.1819	2.93133	2.50688	2.40255	1.92416	2.74629
ENSG00000008838.19_3	MED24	chr17:38175350-38217468	-	protein_coding	5.1852	5.06443	5.16289	5.09868	5.68576	4.7409
ENSG00000008853.16_2	RHOBTB2	chr8:22844930-22877712	+	protein_coding	7.92315	7.51247	7.59123	9.75272	9.76249	8.83915
ENSG00000008869.11_2	HEATR5B	chr2:37195526-37311485	-	protein_coding	2.21212	2.40589	2.42423	2.22451	2.00322	1.98685
ENSG00000008952.16_2	SEC62	chr3:169684423-169716161	+	protein_coding	45.6254	40.9704	45.2404	46.5273	40.236	45.2052
ENSG00000008988.9_2	RPS20	chr8:56979854-56987140	-	protein_coding	73.8483	80.0489	75.0134	58.0472	69.9814	59.3231
ENSG00000009307.15_3	CSDE1	chr1:115259534-115301297	-	protein_coding	133.611	136.204	140.015	115.037	97.1602	108.653
ENSG00000009335.17_3	UBE3C	chr7:156931607-157062066	+	protein_coding	9.16824	9.82555	9.08436	8.79667	8.58682	8.63748
ENSG00000009413.15_3	REV3L	chr6:111620231-111804918	-	protein_coding	3.8407	4.36257	3.98585	3.94219	2.78138	4.5975
ENSG00000009780.15_3	FAM76A	chr1:28052490-28089633	+	protein_coding	2.73332	2.09746	2.34784	1.53846	1.52118	1.55004
ENSG00000009830.11_3	POMT2	chr14:77741299-77787227	-	protein_coding	1.80383	1.41913	1.73074	1.0603	0.853294	1.21233
ENSG00000009844.15_2	VTA1	chr6:142468299-142545826	+	protein_coding	7.45064	7.13484	11.8468	16.3449	10.7786	15.4821
ENSG00000009950.15_4	MLXIPL	chr7:73007524-73038873	-	protein_coding	1.0737	0.769969	0.716879	0.948881	0.615223	1.66187
ENSG00000009954.10_2	BAZ1B	chr7:72854728-72936608	-	protein_coding	32.7803	32.0074	29.3646	27.596	26.5074	25.9279
ENSG00000010017.12_2	RANBP9	chr6:13621730-13711796	-	protein_coding	25.8674	25.0269	25.5959	39.843	37.5085	37.7269
ENSG00000010030.13_3	ETV7	chr6:36321868-36355577	-	protein_coding	1.12594	1.06835	0.940869	0.805965	1.31308	0.953506
ENSG00000010072.15_2	SPRTN	chr1:231472850-231490769	+	protein_coding	5.40008	5.51996	5.24102	7.55904	8.14849	8.27502
ENSG00000010165.19_3	METTL13	chr1:171750804-171783163	+	protein_coding	8.49503	8.44548	8.16176	10.7139	10.3807	12.4829
ENSG00000010244.18_3	ZNF207	chr17:30677136-30708905	+	protein_coding	12.9187	13.4301	13.5162	15.7361	17.5094	17.7766
ENSG00000010256.10_2	UQCRC1	chr3:48636435-48648409	-	protein_coding	42.3822	44.0108	41.5278	57.1437	62.8415	50.1537
ENSG00000010270.13_2	STARD3NL	chr7:38217824-38270272	+	protein_coding	7.30386	7.04267	7.84708	9.99617	10.4979	9.23548
ENSG00000010278.12_3	CD9	chr12:6308881-6347437	+	protein_coding	33.4275	36.442	37.8789	61.493	70.3814	57.5222
ENSG00000010292.12_3	NCAPD2	chr12:6602522-6641121	+	protein_coding	39.1282	36.1357	38.797	32.8241	33.1498	32.2081
ENSG00000010310.8_3	GIPR	chr19:46171502-46186982	+	protein_coding	0.180206	0.34227	0.447693	0.356515	0.601491	0.578024
ENSG00000010318.20_3	PHF7	chr3:52444673-52457657	+	protein_coding	1.5055	1.04601	1.41134	0.422183	0.435878	0.357843
ENSG00000010319.6_3	SEMA3G	chr3:52467069-52479101	-	protein_coding	0.213673	0.204684	0.143542	0.716106	0.743895	0.662403
ENSG00000010322.15_2	NISCH	chr3:52489134-52527087	+	protein_coding	3.81319	3.56518	3.84627	2.55914	2.89722	3.5574
ENSG00000010404.17_3	IDS	chrX:148558521-148602635	-	protein_coding	10.4608	9.59691	11.2402	10.8172	10.4253	10.2751
ENSG00000010539.11_4	ZNF200	chr16:3272325-3286221	-	protein_coding	1.88591	1.98281	2.16198	2.17464	2.40298	2.27356
ENSG00000010626.14_4	LRRC23	chr12:6982733-7023407	+	protein_coding	1.18409	0.780774	0.970375	0.600492	0.68988	0.597652
ENSG00000010704.18_4	HFE	chr6:26087509-26098571	+	protein_coding	1.28677	1.06879	2.30357	1.68732	0.456316	2.01871
ENSG00000010803.16_2	SCMH1	chr1:41492872-41707826	-	protein_coding	5.35852	5.29457	5.38703	2.21375	1.67991	1.71315
ENSG00000010810.17_3	FYN	chr6:111981535-112194655	-	protein_coding	6.65004	7.3688	5.67925	5.72013	5.31292	5.60991
ENSG00000010818.9_2	HIVEP2	chr6:143072604-143277835	-	protein_coding	5.52088	5.40622	5.47256	5.29627	4.58627	5.68913
ENSG00000011007.12_2	ELOA	chr1:24069645-24088549	+	protein_coding	5.72454	5.96829	5.45924	5.9597	6.99134	6.28109
ENSG00000011009.10_2	LYPLA2	chr1:24117460-24122029	+	protein_coding	21.4911	23.9592	25.4979	34.2846	36.2101	32.3087
ENSG00000011021.21_3	CLCN6	chr1:11866153-11903201	+	protein_coding	2.99329	3.31848	2.43741	1.96361	2.72007	4.19644
ENSG00000011028.13_2	MRC2	chr17:60704762-60770958	+	protein_coding	11.9684	13.2273	10.2827	4.77082	4.2685	5.05486
ENSG00000011052.21_3	NME1-NME2	chr17:49230951-49249105	+	protein_coding	128.054	131.791	104.977	109.768	135.005	120.138
ENSG00000011105.12_3	TSPAN9	chr12:3186521-3395730	+	protein_coding	1.37079	1.3459	1.36104	2.52762	2.62216	2.36538
ENSG00000011114.14_3	BTBD7	chr14:93703896-93799438	-	protein_coding	2.64145	3.16651	2.84061	2.66768	2.46242	2.92457
ENSG00000011132.11_3	APBA3	chr19:3750817-3761697	-	protein_coding	1.19233	0.910742	0.961165	0.870143	0.882993	1.08168
ENSG00000011143.16_3	MKS1	chr17:56282798-56296966	-	protein_coding	3.50721	3.31483	3.43173	1.61837	1.38216	1.80503
ENSG00000011198.7_2	ABHD5	chr3:43731605-43775863	+	protein_coding	11.4827	10.0398	12.2461	11.838	11.4522	11.0494
ENSG00000011243.17_3	AKAP8L	chr19:15490859-15529952	-	protein_coding	8.87185	10.4223	11.2172	9.84291	10.1315	10.0574
ENSG00000011258.15_3	MBTD1	chr17:49254786-49337524	-	protein_coding	5.64068	5.79255	6.13979	4.51046	3.58911	5.80105
ENSG00000011260.13_2	UTP18	chr17:49337889-49375297	+	protein_coding	35.8036	35.3951	34.1628	31.6436	39.4097	32.1014
ENSG00000011275.18_3	RNF216	chr7:5659678-5821370	-	protein_coding	9.73213	9.08421	9.17435	9.02881	8.47694	13.3279
ENSG00000011295.15_4	TTC19	chr17:15902694-15948329	+	protein_coding	3.80881	4.20079	3.66683	6.49082	2.67663	3.22157
ENSG00000011304.19_4	PTBP1	chr19:797075-812327	+	protein_coding	33.4592	25.5531	29.7026	38.0534	44.1527	24.6125
ENSG00000011332.19_3	DPF1	chr19:38701646-38720354	-	protein_coding	0.433183	0.320348	0.374503	2.37812	2.37063	2.61141
ENSG00000011347.9_3	SYT7	chr11:61282785-61348620	-	protein_coding	0.212435	0.213756	0.127832	2.30404	1.01616	2.27242
ENSG00000011376.9_3	LARS2	chr3:45429998-45590913	+	protein_coding	4.94502	5.2891	3.34113	4.45763	4.60236	6.6934
ENSG00000011405.13_3	PIK3C2A	chr11:17099277-17229530	-	protein_coding	19.7033	20.4115	18.1996	18.5583	14.1586	19.9182
ENSG00000011422.11_3	PLAUR	chr19:44150247-44174699	-	protein_coding	9.64293	8.62243	9.39186	8.88478	9.80588	10.2117
ENSG00000011426.10_3	ANLN	chr7:36429415-36493400	+	protein_coding	45.0609	41.8886	45.1339	39.876	35.136	39.1927
ENSG00000011451.17_3	WIZ	chr19:15530791-15560762	-	protein_coding	3.29366	3.45239	3.09993	3.75897	3.92847	3.93167
ENSG00000011454.16_3	RABGAP1	chr9:125703112-125867145	+	protein_coding	10.887	9.90651	9.56042	9.50173	7.27446	9.21331
ENSG00000011478.11_2	QPCTL	chr19:46195741-46207247	+	protein_coding	3.88868	4.92243	5.94446	5.60469	6.45599	4.66232
ENSG00000011485.14_2	PPP5C	chr19:46850251-46896238	+	protein_coding	5.95001	6.66619	6.20109	8.37442	9.62645	6.01981
ENSG00000011523.13_3	CEP68	chr2:65283500-65314138	+	protein_coding	1.82186	1.64309	1.73573	0.431162	0.325001	0.428194
ENSG00000011566.14_3	MAP4K3	chr2:39476407-39664453	-	protein_coding	9.18753	10.5563	6.52109	8.52252	10.7492	8.57033
ENSG00000011638.10_3	TMEM159	chr16:21169698-21191937	+	protein_coding	2.45415	2.60611	5.48256	7.10033	8.08345	6.82738
ENSG00000011677.12_2	GABRA3	chrX:151334706-151619830	-	protein_coding	5.96367	5.72821	6.17041	5.89861	5.82837	5.18445
ENSG00000012048.20_3	BRCA1	chr17:41196312-41322262	-	protein_coding	13.3236	12.4382	10.9258	4.55001	4.58509	5.07757
ENSG00000012061.15_3	ERCC1	chr19:45910591-45982086	-	protein_coding	6.49445	6.57415	6.80684	3.75385	3.43539	4.45398
ENSG00000012124.16_3	CD22	chr19:35810164-35838258	+	protein_coding	0.515743	0.606601	0.497448	0.156639	0.132501	0.0618194
ENSG00000012171.19_3	SEMA3B	chr3:50304990-50314977	+	protein_coding	13.1145	11.1332	9.32083	5.30069	5.49057	7.10179
ENSG00000012174.11_3	MBTPS2	chrX:21857754-21903542	+	protein_coding	5.41375	5.42168	5.71266	2.5653	2.24115	2.34815
ENSG00000012211.12_3	PRICKLE3	chrX:49031613-49042981	-	protein_coding	5.87445	6.30248	6.00867	6.53594	6.75991	6.52546
ENSG00000012232.8_2	EXTL3	chr8:28457986-28613116	+	protein_coding	4.19699	4.54088	4.08595	3.14248	5.20822	4.77084
ENSG00000012660.13_3	ELOVL5	chr6:53132196-53213977	-	protein_coding	47.5605	51.7061	47.242	54.6466	55.7178	55.5426
ENSG00000012779.10_2	ALOX5	chr10:45869624-45941567	+	protein_coding	4.16888	4.1036	3.50994	1.87126	1.78793	2.28905
ENSG00000012822.15_3	CALCOCO1	chr12:54102301-54121529	-	protein_coding	5.82096	5.95542	5.82144	5.05292	4.65512	6.57153
ENSG00000012963.14_3	UBR7	chr14:93673401-93695561	+	protein_coding	16.3327	14.6802	14.8112	10.1887	9.5188	10.3142
ENSG00000012983.11_2	MAP4K5	chr14:50885219-51027844	-	protein_coding	8.24251	9.02234	7.67068	9.98908	8.68935	10.3945
ENSG00000013275.7_2	PSMC4	chr19:40476912-40487348	+	protein_coding	28.2591	28.254	29.9575	57.4755	63.9848	55.5469
ENSG00000013288.8_2	MAN2B2	chr4:6576902-6625089	+	protein_coding	1.66916	1.51768	1.6295	1.7117	1.38372	1.69901
ENSG00000013306.15_3	SLC25A39	chr17:42396993-42402238	-	protein_coding	13.3222	14.0671	16.4331	11.2705	13.3472	11.835
ENSG00000013364.18_3	MVP	chr16:29831715-29859360	+	protein_coding	14.1643	14.81	13.6657	11.3023	10.2078	9.81011
ENSG00000013374.15_4	NUB1	chr7:151038785-151075535	+	protein_coding	28.0339	23.481	24.9746	20.4697	19.8046	24.5231
ENSG00000013375.15_3	PGM3	chr6:83870869-83903655	-	protein_coding	5.55644	10.4102	5.26846	4.23942	4.54152	5.23566
ENSG00000013392.7_2	RWDD2A	chr6:83903098-83908651	+	protein_coding	2.20381	2.53075	2.32215	1.33702	1.16886	1.58143
ENSG00000013441.15_2	CLK1	chr2:201717732-201729467	-	protein_coding	10.9481	10.7229	10.1566	7.41473	7.38183	8.08366
ENSG00000013503.9_2	POLR3B	chr12:106751436-106903976	+	protein_coding	4.85455	5.38521	4.63786	5.43897	5.73248	5.1606
ENSG00000013523.9_3	ANGEL1	chr14:77252521-77292589	-	protein_coding	3.08857	2.64953	3.20073	3.31576	3.18971	2.90495
ENSG00000013561.17_3	RNF14	chr5:141337893-141369856	+	protein_coding	7.48955	6.08144	5.79406	10.4286	11.6244	10.9661
ENSG00000013563.13_3	DNASE1L1	chrX:153629579-153640449	-	protein_coding	4.76124	4.27239	4.46319	3.5765	3.50191	3.6222
ENSG00000013573.16_3	DDX11	chr12:31226779-31257725	+	protein_coding	8.21203	8.05014	8.31544	5.07082	5.49079	6.17527
ENSG00000013583.8_3	HEBP1	chr12:13127798-13153207	-	protein_coding	16.5444	16.4998	13.842	5.13474	5.35551	4.93287
ENSG00000013588.7_3	GPRC5A	chr12:13043716-13070871	+	protein_coding	45.4092	45.1294	47.7972	44.5241	46.5097	42.9518
ENSG00000013619.13_3	MAMLD1	chrX:149529689-149682448	+	protein_coding	4.23332	2.81371	2.76997	5.46304	6.72313	5.45308
ENSG00000013810.18_3	TACC3	chr4:1723217-1746903	+	protein_coding	10.9296	10.6367	8.86623	9.77493	10.2704	10.1109
ENSG00000014123.9_2	UFL1	chr6:96969471-97003152	+	protein_coding	14.8328	12.0183	13.5722	7.09374	5.29239	7.15125
ENSG00000014138.8_3	POLA2	chr11:65029233-65073060	+	protein_coding	10.1734	10.829	9.80699	10.2403	8.80308	9.51172
ENSG00000014164.6_2	ZC3H3	chr8:144519825-144623623	-	protein_coding	4.5961	5.50547	5.46132	4.65595	5.3251	5.46966
ENSG00000014216.15_4	CAPN1	chr11:64948037-64979477	+	protein_coding	9.11862	9.64904	10.2188	12.2454	13.0424	11.3945
ENSG00000014257.15_2	ACPP	chr3:132036211-132087142	+	protein_coding	0.14657	0.255028	0.304398	1.49516	1.36328	1.46622
ENSG00000014641.17_2	MDH1	chr2:63815743-63834331	+	protein_coding	25.5671	24.3717	24.0978	22.9824	24.374	20.9038
ENSG00000014824.13_3	SLC30A9	chr4:41992489-42092474	+	protein_coding	9.6998	8.95949	8.93927	6.48249	5.19156	5.78654
ENSG00000014914.20_2	MTMR11	chr1:149900543-149908762	-	protein_coding	2.62542	2.30489	3.31595	3.21721	3.50909	3.79762
ENSG00000014919.12_2	COX15	chr10:101471601-101491857	-	protein_coding	11.5241	11.4311	11.7638	9.77536	8.71828	8.88873
ENSG00000015133.18_2	CCDC88C	chr14:91737667-91884188	-	protein_coding	1.85956	1.65817	1.50836	1.18533	1.19195	1.25911
ENSG00000015153.14_2	YAF2	chr12:42550906-42632151	-	protein_coding	3.82624	2.98168	2.79867	2.22148	1.88342	3.04576
ENSG00000015171.19_3	ZMYND11	chr10:180405-300577	+	protein_coding	6.60944	11.3368	8.98413	4.75547	3.7968	4.51664
ENSG00000015475.18_2	BID	chr22:18216904-18257536	-	protein_coding	7.46779	6.53888	7.42721	10.0943	9.83029	9.90907
ENSG00000015479.18_3	MATR3	chr5:138629337-138667366	+	protein_coding	15.5115	11.9143	11.555	16.0908	15.5012	12.5819
ENSG00000015532.9_2	XYLT2	chr17:48423453-48440499	+	protein_coding	2.92503	2.29982	2.83031	1.59181	1.99366	1.85659
ENSG00000015568.12_2	RGPD5	chr2:110550335-110615272	+	protein_coding	4.29103	3.76613	3.72972	2.9069	2.42741	3.31104
ENSG00000015676.17_2	NUDCD3	chr7:44418720-44530479	-	protein_coding	1.8728	4.14386	3.79966	2.50569	2.63322	2.60151
ENSG00000016391.10_3	CHDH	chr3:53846362-53880417	-	protein_coding	2.6207	2.09315	1.81192	0.653656	0.668966	0.790778
ENSG00000016864.18_3	GLT8D1	chr3:52728504-52740048	-	protein_coding	7.68078	10.752	8.00673	8.31661	7.41456	7.13862
ENSG00000017260.19_4	ATP2C1	chr3:130569439-130735556	+	protein_coding	16.1226	13.0211	15.1137	17.1571	15.5988	15.2791
ENSG00000017483.14_3	SLC38A5	chrX:48316920-48328644	-	protein_coding	8.79998	10.6811	9.71698	14.6594	15.2681	9.49207
ENSG00000017797.12_3	RALBP1	chr18:9475007-9538114	+	protein_coding	10.2086	9.23357	8.90917	11.4726	12.5786	11.1934
ENSG00000018189.12_3	RUFY3	chr4:71569921-71673032	+	protein_coding	1.82309	2.17126	2.00871	1.31943	1.08502	1.65487
ENSG00000018408.14_3	WWTR1	chr3:149235022-149454501	-	protein_coding	13.6345	13.1769	13.0546	17.222	20.0513	16.4546
ENSG00000018510.13_3	AGPS	chr2:178257372-178424027	+	protein_coding	16.3277	16.0554	16.0921	17.6821	15.784	16.7646
ENSG00000018610.13_2	CXorf56	chrX:118672112-118699371	-	protein_coding	7.49472	6.99992	8.73308	11.9056	10.8468	7.03832
ENSG00000018699.11_2	TTC27	chr2:32853099-33046118	+	protein_coding	8.47924	7.97207	7.26348	5.95669	6.83982	6.06743
ENSG00000019144.18_3	PHLDB1	chr11:118477155-118528748	+	protein_coding	1.75466	1.78699	1.71209	1.70312	1.52068	1.72861
ENSG00000019169.10_3	MARCO	chr2:119699742-119752236	+	protein_coding	0.606812	0.763827	0.565663	0.437918	0.424029	0.493601
ENSG00000019186.9_2	CYP24A1	chr20:52769988-52790512	-	protein_coding	0.126332	0.0656387	0.0680705	1.72835	1.50633	2.22116
ENSG00000019485.13_3	PRDM11	chr11:45117357-45256661	+	protein_coding	1.63507	1.80161	1.90053	1.97681	2.16211	1.94513
ENSG00000019549.9_2	SNAI2	chr8:49830327-49834299	-	protein_coding	7.32527	5.84744	6.86617	10.5391	8.56482	9.39866
ENSG00000019995.6_3	ZRANB1	chr10:126630692-126676758	+	protein_coding	14.6383	13.9208	13.2539	14.6729	15.9785	14.2039
ENSG00000020129.15_2	NCDN	chr1:36023074-36032875	+	protein_coding	3.06062	3.36254	3.08835	4.59108	4.74179	4.88337
ENSG00000020181.17_2	ADGRA2	chr8:37641709-37702414	+	protein_coding	1.36624	1.59101	1.31667	1.52495	1.03993	1.49075
ENSG00000020256.19_3	ZFP64	chr20:50668202-50820847	-	protein_coding	3.11703	2.98945	3.07876	3.41418	3.48513	3.3757
ENSG00000020426.10_3	MNAT1	chr14:61201460-61436671	+	protein_coding	9.39421	8.86717	9.04117	9.2283	12.2671	10.009
ENSG00000020577.13_2	SAMD4A	chr14:55033815-55260033	+	protein_coding	1.50925	1.18104	1.58956	1.14153	1.26294	1.56271
ENSG00000020633.18_2	RUNX3	chr1:25226002-25291612	-	protein_coding	17.8634	18.666	19.433	22.5828	22.6016	21.1323
ENSG00000020922.12_3	MRE11	chr11:94148744-94227074	-	protein_coding	26.4308	23.4117	24.1376	13.5655	10.9807	13.1521
ENSG00000021355.12_2	SERPINB1	chr6:2832566-2842240	-	protein_coding	26.8141	25.0655	25.0874	8.37488	8.33998	7.80269
ENSG00000021574.11_2	SPAST	chr2:32288680-32382706	+	protein_coding	2.18209	1.90183	1.95088	2.26995	2.267	2.18905
ENSG00000021762.19_3	OSBPL5	chr11:3108346-3187969	-	protein_coding	10.9044	10.3368	8.88967	5.72195	5.30294	6.29384
ENSG00000021776.10_3	AQR	chr15:35143983-35262040	-	protein_coding	8.27666	7.74926	8.15136	7.61979	6.94694	7.07812
ENSG00000021826.14_3	CPS1	chr2:211342406-211543831	+	protein_coding	16.4917	19.9117	11.3331	14.3742	13.1974	12.2301
ENSG00000022267.16_3	FHL1	chrX:135228861-135293518	+	protein_coding	4.25871	3.56197	2.51053	6.13024	10.6595	9.39741
ENSG00000022277.12_3	RTFDC1	chr20:55043641-55094505	+	protein_coding	23.4466	22.9504	25.9123	30.7186	33.301	28.7752
ENSG00000022567.9_3	SLC45A4	chr8:142217265-142318404	-	protein_coding	1.29584	1.56938	1.1623	2.28402	2.42642	2.13326
ENSG00000022840.15_3	RNF10	chr12:120971283-121015397	+	protein_coding	14.626	13.867	14.6316	16.3023	16.8922	14.674
ENSG00000022976.15_3	ZNF839	chr14:102783714-102809039	+	protein_coding	1.29346	1.37058	1.43857	0.804552	0.754177	0.802953
ENSG00000023041.11_3	ZDHHC6	chr10:114184186-114206675	-	protein_coding	27.3574	26.3804	25.8967	32.637	27.8027	29.6543
ENSG00000023171.16_3	GRAMD1B	chr11:123229136-123498482	+	protein_coding	2.33718	2.0933	1.9749	4.91983	4.51475	5.04523
ENSG00000023191.16_2	RNH1	chr11:494512-507300	-	protein_coding	4.32471	4.15633	4.52263	4.55724	4.50886	5.15997
ENSG00000023228.13_3	NDUFS1	chr2:206979541-207024327	-	protein_coding	7.91063	8.04855	7.73099	7.2967	6.35933	6.70543
ENSG00000023287.12_3	RB1CC1	chr8:53535016-53658403	-	protein_coding	37.6518	32.7867	36.4101	44.2635	33.2165	37.7155
ENSG00000023318.7_3	ERP44	chr9:102741461-102861322	-	protein_coding	10.4221	9.89536	8.75303	11.8857	11.103	10.4131
ENSG00000023330.14_2	ALAS1	chr3:52232102-52248343	+	protein_coding	23.3728	23.1961	23.5874	41.3183	45.2421	35.8122
ENSG00000023445.13_2	BIRC3	chr11:102188181-102210134	+	protein_coding	35.2116	35.6999	32.4051	24.6515	18.7583	26.1998
ENSG00000023516.8_2	AKAP11	chr13:42846289-42897403	+	protein_coding	4.12336	3.47381	4.17507	5.78356	4.16599	6.34779
ENSG00000023572.8_2	GLRX2	chr1:193065598-193075244	-	protein_coding	26.9904	24.3121	21.5248	24.4117	25.3423	23.6398
ENSG00000023608.4_3	SNAPC1	chr14:62229075-62263146	+	protein_coding	11.2774	10.7051	9.79808	15.4411	16.2852	14.6974
ENSG00000023697.12_3	DERA	chr12:16064106-16190216	+	protein_coding	8.77979	6.8919	6.25736	3.17882	2.0214	3.04287
ENSG00000023734.10_3	STRAP	chr12:16035325-16056412	+	protein_coding	50.5755	58.9676	50.1736	63.0853	66.7886	60.8359
ENSG00000023839.10_2	ABCC2	chr10:101542489-101611949	+	protein_coding	4.37269	6.05664	4.76951	9.85997	7.79257	14.0392
ENSG00000023902.13_2	PLEKHO1	chr1:150121373-150136916	+	protein_coding	0.384661	0.374522	0.344931	1.30207	1.32207	1.18519
ENSG00000023909.9_2	GCLM	chr1:94350761-94375012	-	protein_coding	9.81535	11.1589	9.90836	12.3929	12.4495	11.7549
ENSG00000024048.10_2	UBR2	chr6:42531800-42661242	+	protein_coding	8.35818	7.4367	7.11104	10.165	9.77926	9.79293
ENSG00000024422.11_3	EHD2	chr19:48216600-48246391	+	protein_coding	14.2448	14.2542	13.3279	12.612	7.83761	11.1402
ENSG00000024526.16_3	DEPDC1	chr1:68939835-68962904	-	protein_coding	11.0349	14.3694	15.5998	10.6115	4.9188	9.7194
ENSG00000024862.17_3	CCDC28A	chr6:139094646-139114456	+	protein_coding	14.576	13.6034	14.0923	13.4424	14.6242	12.9525
ENSG00000025156.12_2	HSF2	chr6:122720691-122754264	+	protein_coding	8.4333	7.44361	7.31424	10.0122	8.57877	10.0446
ENSG00000025293.16_3	PHF20	chr20:34359896-34538303	+	protein_coding	17.4903	16.0685	16.7385	8.90035	7.5826	8.76072
ENSG00000025434.18_3	NR1H3	chr11:47269851-47290583	+	protein_coding	3.23263	3.99595	3.23615	4.74134	4.38709	5.25416
ENSG00000025708.13_3	TYMP	chr22:50964181-50968485	-	protein_coding	2.00923	2.2807	1.62527	1.60818	1.8342	1.50899
ENSG00000025770.18_2	NCAPH2	chr22:50946645-50961901	+	protein_coding	11.4145	12.8723	12.4604	9.74963	10.4239	9.63015
ENSG00000025772.7_2	TOMM34	chr20:43570771-43589127	-	protein_coding	26.7176	26.6106	25.371	66.0232	67.9652	62.3853
ENSG00000025796.13_2	SEC63	chr6:108188960-108279393	-	protein_coding	17.8439	16.7222	16.1604	15.5602	11.991	14.0843
ENSG00000025800.13_3	KPNA6	chr1:32573639-32642169	+	protein_coding	14.5431	16.0987	10.158	11.877	16.9716	10.8775
ENSG00000026025.15_3	VIM	chr10:17270258-17279592	+	protein_coding	136.019	131.486	134.26	86.6259	96.4223	82.3601
ENSG00000026036.21_3	RTEL1-TNFRSF6B	chr20:62290653-62330037	+	protein_coding	1.01585	0.197143	0.845906	0.259538	0.189385	1.33911
ENSG00000026103.21_3	FAS	chr10:90750339-90775542	+	protein_coding	2.95437	2.05654	1.63463	1.38784	3.49429	3.32564
ENSG00000026297.15_3	RNASET2	chr6:167342992-167370679	-	protein_coding	1.28776	0.921235	1.17914	1.18999	0.953154	0.835329
ENSG00000026508.17_4	CD44	chr11:35160417-35253949	+	protein_coding	37.9672	38.6801	47.7803	42.3035	41.4232	36.5886
ENSG00000026652.13_3	AGPAT4	chr6:161551011-161695093	-	protein_coding	0.897249	1.01555	1.0029	1.07409	1.29676	1.71252
ENSG00000026950.16_3	BTN3A1	chr6:26402465-26415444	+	protein_coding	2.34316	1.90597	2.2607	1.81977	1.42217	1.52545
ENSG00000027001.9_3	MIPEP	chr13:24304328-24463558	-	protein_coding	3.33572	2.67731	2.58001	1.48132	1.49569	1.83732
ENSG00000027697.13_3	IFNGR1	chr6:137518621-137540586	-	protein_coding	16.6046	17.5529	16.773	25.5444	21.6362	21.4464
ENSG00000027847.13_3	B4GALT7	chr5:177027101-177037348	+	protein_coding	1.40877	1.27636	1.38449	0.87445	1.09115	0.85413
ENSG00000027869.11_3	SH2D2A	chr1:156776035-156786654	-	protein_coding	10.4873	9.42817	9.93668	14.2864	15.9659	13.7343
ENSG00000028116.16_3	VRK2	chr2:58134786-58387055	+	protein_coding	13.4877	12.7452	12.4615	5.57883	5.2641	5.97393
ENSG00000028137.18_3	TNFRSF1B	chr1:12227060-12269285	+	protein_coding	5.16889	6.40901	5.29407	12.5246	15.7108	11.3679
ENSG00000028203.17_2	VEZT	chr12:95611522-95696566	+	protein_coding	6.95325	7.62615	8.22515	10.17	6.83414	8.48721
ENSG00000028310.17_3	BRD9	chr5:850406-892939	-	protein_coding	8.92359	9.0108	8.29204	2.68133	2.96581	4.32666
ENSG00000028528.14_3	SNX1	chr15:64386322-64438289	+	protein_coding	10.9136	11.5096	9.9841	9.47596	9.81007	12.1548
ENSG00000028839.9_3	TBPL1	chr6:134273308-134311570	+	protein_coding	2.9291	3.51537	3.29443	4.41571	4.01064	4.03874
ENSG00000029153.14_3	ARNTL2	chr12:27485787-27578222	+	protein_coding	24.1252	20.8625	23.7777	13.8296	10.9722	12.7149
ENSG00000029363.16_3	BCLAF1	chr6:136577765-136610989	-	protein_coding	18.4081	17.4469	17.2924	18.9421	15.8601	18.1344
ENSG00000029364.11_2	SLC39A9	chr14:69864732-69929105	+	protein_coding	6.98573	6.71498	9.27609	8.17379	7.63363	9.94201
ENSG00000029534.19_3	ANK1	chr8:41510739-41754280	-	protein_coding	3.3345	3.19428	3.48523	4.95672	4.18103	4.82261
ENSG00000029639.10_2	TFB1M	chr6:155578643-155635627	-	protein_coding	4.00298	3.51991	3.18546	2.5575	2.64178	2.35917
ENSG00000029725.16_3	RABEP1	chr17:5185560-5289132	+	protein_coding	19.9874	18.9147	17.2595	16.7388	15.6963	15.4862
ENSG00000029993.14_3	HMGB3	chrX:150148982-150159248	+	protein_coding	31.6502	28.4624	30.5174	29.5085	30.0628	29.3625
ENSG00000030066.13_3	NUP160	chr11:47799639-47870107	-	protein_coding	45.4056	44.4144	44.1759	42.3893	38.1657	40.0609
ENSG00000030110.12_2	BAK1	chr6:33540324-33548070	-	protein_coding	13.5437	15.1308	15.7961	30.2416	32.3588	26.135
ENSG00000030582.17_3	GRN	chr17:42422454-42430470	+	protein_coding	16.6115	23.2599	17.4584	21.9593	21.5904	18.6537
ENSG00000031003.10_3	FAM13B	chr5:137273649-137387650	-	protein_coding	10.5063	10.7898	11.3439	20.7533	18.376	20.5067
ENSG00000031081.10_4	ARHGAP31	chr3:119013220-119139561	+	protein_coding	2.79211	2.87257	2.98918	5.46464	5.29536	5.27846
ENSG00000031691.6_2	CENPQ	chr6:49431091-49460820	+	protein_coding	31.5382	28.6736	29.3379	29.0885	22.3563	27.2137
ENSG00000031698.12_2	SARS	chr1:109756540-109780791	+	protein_coding	88.8643	90.3398	84.7906	52.4198	55.7835	51.2073
ENSG00000031823.14_3	RANBP3	chr19:5916150-5978153	-	protein_coding	3.61211	3.64961	3.54745	4.15713	4.7725	4.10425
ENSG00000032219.18_2	ARID4A	chr14:58765103-58840605	+	protein_coding	9.36007	6.89382	7.85989	7.24726	6.13809	8.45495
ENSG00000032389.12_4	EIPR1	chr2:3192696-3381653	-	protein_coding	2.4182	3.23357	2.64037	2.71296	2.49452	2.58781
ENSG00000032444.15_3	PNPLA6	chr19:7598890-7626650	+	protein_coding	6.94348	8.09988	7.64561	14.7144	14.508	12.5923
ENSG00000032742.17_3	IFT88	chr13:21141208-21265576	+	protein_coding	1.7225	1.75109	1.45429	0.980339	0.857678	0.856524
ENSG00000033011.11_3	ALG1	chr16:5083961-5137380	+	protein_coding	4.98717	5.32531	3.88701	3.25117	3.9225	3.7348
ENSG00000033030.13_2	ZCCHC8	chr12:122956147-122985620	-	protein_coding	11.4564	11.0605	11.2452	5.75359	5.56101	7.67461
ENSG00000033050.7_2	ABCF2	chr7:150904923-150924316	-	protein_coding	17.0073	16.8004	17.6414	21.399	22.7464	20.8057
ENSG00000033100.16_3	CHPF2	chr7:150929575-150935913	+	protein_coding	7.75279	11.6671	8.73903	10.2544	10.3761	9.29907
ENSG00000033170.16_3	FUT8	chr14:65877310-66210839	+	protein_coding	4.20655	3.73867	4.1449	7.38276	5.83084	6.52308
ENSG00000033178.12_2	UBA6	chr4:68478370-68566897	-	protein_coding	11.6962	11.1891	11.4839	10.5918	9.37954	9.95817
ENSG00000033327.12_3	GAB2	chr11:77926343-78129394	-	protein_coding	7.46425	8.16413	8.68089	5.65485	5.40233	5.62163
ENSG00000033627.16_3	ATP6V0A1	chr17:40610862-40674629	+	protein_coding	2.40188	2.74846	2.49414	6.04521	5.8621	5.54967
ENSG00000033800.13_2	PIAS1	chr15:68346517-68490941	+	protein_coding	6.62762	6.71826	7.42749	7.36797	6.41135	7.7574
ENSG00000033867.16_3	SLC4A7	chr3:27414212-27525911	-	protein_coding	9.16004	8.14278	8.86986	5.73492	5.49616	6.95729
ENSG00000034152.18_3	MAP2K3	chr17:21187984-21218552	+	protein_coding	13.9058	15.2213	15.765	21.5845	27.4975	22.7898
ENSG00000034510.5_2	TMSB10	chr2:85132749-85133799	+	protein_coding	1206.63	1324.24	1300.09	1260.32	1531.58	1307.56
ENSG00000034533.11_2	ASTE1	chr3:130732719-130746493	-	protein_coding	2.33412	2.99082	1.86525	1.03353	1.28648	2.23186
ENSG00000034677.12_3	RNF19A	chr8:101269288-101348446	-	protein_coding	10.0731	7.67639	7.74404	10.9218	9.31216	11.8107
ENSG00000034693.14_3	PEX3	chr6:143771944-143811147	+	protein_coding	12.3101	11.4109	12.2934	14.1867	13.7052	14.5276
ENSG00000034713.7_2	GABARAPL2	chr16:75600249-75611779	+	protein_coding	24.4946	24.2902	23.3982	31.3811	33.0447	30.5035
ENSG00000035141.7_2	FAM136A	chr2:70523107-70529222	-	protein_coding	29.1947	27.501	28.5852	20.17	18.2046	18.0173
ENSG00000035403.17_3	VCL	chr10:75754951-75881121	+	protein_coding	42.5757	72.7882	46.3355	50.9997	43.4389	25.7312
ENSG00000035499.12_2	DEPDC1B	chr5:59892739-59996017	-	protein_coding	8.00018	7.36392	7.37311	10.4623	10.1497	10.186
ENSG00000035664.11_4	DAPK2	chr15:64199235-64364232	-	protein_coding	0.724223	0.653507	0.671112	0.538322	0.507314	0.521723
ENSG00000035681.7_3	NSMAF	chr8:59496063-59572403	-	protein_coding	5.68227	6.25499	6.07689	3.48596	2.93884	3.54587
ENSG00000035687.9_3	ADSS	chr1:244571796-244615436	-	protein_coding	29.3083	27.1803	26.1576	28.4265	26.4005	26.7618
ENSG00000035862.12_3	TIMP2	chr17:76849059-76921469	-	protein_coding	53.7226	24.0701	53.2391	32.9632	72.9074	27.0568
ENSG00000035928.15_3	RFC1	chr4:39289076-39367995	-	protein_coding	19.581	21.2879	22.3644	27.2226	23.6509	28.2484
ENSG00000036054.12_2	TBC1D23	chr3:99979844-100044095	+	protein_coding	7.55305	11.1262	12.9894	8.2801	8.1467	15.2311
ENSG00000036257.12_3	CUL3	chr2:225334867-225450114	-	protein_coding	4.70033	3.78795	3.73087	4.85439	4.85037	4.52682
ENSG00000036549.12_3	ZZZ3	chr1:78028101-78149104	-	protein_coding	6.73555	6.71664	7.91974	5.28527	3.84261	7.02826
ENSG00000036672.15_3	USP2	chr11:119225925-119252436	-	protein_coding	0.287513	0.288582	0.190817	1.49691	1.73446	1.43705
ENSG00000037042.8_2	TUBG2	chr17:40811323-40819024	+	protein_coding	6.56225	5.48984	6.03819	5.14687	5.32875	7.57858
ENSG00000037241.7_3	RPL26L1	chr5:172385732-172396774	+	protein_coding	51.8384	52.2599	59.5156	72.8879	81.5525	67.1268
ENSG00000037474.14_2	NSUN2	chr5:6599352-6633404	-	protein_coding	59.6332	54.4519	52.9695	55.7532	50.63	52.6072
ENSG00000037637.10_3	FBXO42	chr1:16573334-16678949	-	protein_coding	3.16832	2.77246	3.16855	2.47088	2.63913	3.07657
ENSG00000037749.11_3	MFAP3	chr5:153418466-153600038	+	protein_coding	6.9009	4.14488	8.00502	6.63272	4.05043	1.12342
ENSG00000037757.13_3	MRI1	chr19:13875346-13885096	+	protein_coding	14.3004	16.1926	16.0131	14.0409	16.7824	13.9017
ENSG00000037897.16_3	METTL1	chr12:58162254-58166576	-	protein_coding	3.28272	3.74975	3.60524	1.84891	2.37448	2.38539
ENSG00000037965.5_3	HOXC8	chr12:54402890-54406146	+	protein_coding	3.92582	3.80121	3.70628	4.21379	4.8155	6.21313
ENSG00000038002.8_2	AGA	chr4:178351924-178363657	-	protein_coding	3.31832	2.92751	2.49579	2.68767	2.81551	2.31497
ENSG00000038210.12_3	PI4K2B	chr4:25235597-25280714	+	protein_coding	15.3595	11.5903	13.0002	8.68237	7.19954	7.37272
ENSG00000038219.12_2	BOD1L1	chr4:13570362-13629347	-	protein_coding	9.91264	8.91804	8.40348	6.48866	4.40931	8.60163
ENSG00000038274.16_2	MAT2B	chr5:162930120-162946342	+	protein_coding	27.0674	27.9259	27.292	28.9621	29.9788	26.6221
ENSG00000038295.7_2	TLL1	chr4:166794410-167025047	+	protein_coding	3.80412	3.58891	3.85234	7.02341	5.65481	6.77338
ENSG00000038358.14_3	EDC4	chr16:67906926-67918406	+	protein_coding	8.00611	7.27028	8.0549	9.41681	10.0212	8.80246
ENSG00000038382.18_2	TRIO	chr5:14143811-14532237	+	protein_coding	19.5335	20.4233	20.0003	21.2507	18.5088	20.5497
ENSG00000038532.14_3	CLEC16A	chr16:11038345-11276046	+	protein_coding	1.68776	1.84158	1.5061	2.26127	2.28084	2.29905
ENSG00000039123.15_3	SKIV2L2	chr5:54603588-54721409	+	protein_coding	25.4606	21.0573	21.6063	20.9446	18.3293	19.7955
ENSG00000039139.9_3	DNAH5	chr5:13690440-13944652	-	protein_coding	0.687709	0.632847	0.735743	0.216362	0.105216	0.242723
ENSG00000039319.16_3	ZFYVE16	chr5:79703832-79775169	+	protein_coding	3.7445	2.79276	4.47316	3.35811	3.92435	3.9648
ENSG00000039523.19_4	RIPOR1	chr16:67552321-67580691	+	protein_coding	9.33774	9.93397	9.39926	9.9921	9.32644	9.73263
ENSG00000039560.13_2	RAI14	chr5:34656342-34832732	+	protein_coding	10.7073	9.19194	8.54562	13.8266	10.6161	8.55821
ENSG00000039650.11_3	PNKP	chr19:50363139-50381608	-	protein_coding	2.41083	2.25777	2.22229	1.4546	1.70347	1.55417
ENSG00000040199.18_3	PHLPP2	chr16:71671738-71758604	-	protein_coding	2.43413	2.6536	2.13019	2.70976	2.47462	3.24169
ENSG00000040275.16_3	SPDL1	chr5:169010638-169031782	+	protein_coding	40.8995	35.2339	32.6941	31.3746	30.7417	31.5251
ENSG00000040341.17_4	STAU2	chr8:74332604-74659943	-	protein_coding	3.86522	2.65522	3.3558	3.69149	3.2504	3.64096
ENSG00000040487.12_3	PQLC2	chr1:19638820-19655794	+	protein_coding	3.52986	3.6149	2.75954	2.43935	2.68655	2.84843
ENSG00000040531.14_3	CTNS	chr17:3539762-3564836	+	protein_coding	2.68356	2.68723	2.47436	2.93169	3.3081	2.58231
ENSG00000040608.13_3	RTN4R	chr22:20228938-20270769	-	protein_coding	1.43262	2.08371	1.75537	2.62895	3.30152	2.84673
ENSG00000040633.12_3	PHF23	chr17:7138347-7143041	-	protein_coding	12.2487	13.0542	12.7535	18.3056	17.8026	17.537
ENSG00000040933.15_2	INPP4A	chr2:99061317-99210853	+	protein_coding	3.52371	3.31879	1.46833	1.12641	1.02647	1.19491
ENSG00000041353.9_3	RAB27B	chr18:52385091-52562747	+	protein_coding	10.9634	8.79315	10.8995	12.9009	10.8247	12.9712
ENSG00000041357.15_2	PSMA4	chr15:78832747-78844761	+	protein_coding	26.244	20.2141	20.4734	31.0365	41.0539	37.1631
ENSG00000041802.10_2	LSG1	chr3:194361517-194393206	-	protein_coding	7.37913	7.77406	7.55815	10.1494	9.78709	9.92647
ENSG00000041880.14_3	PARP3	chr3:51976361-51982883	+	protein_coding	6.52782	6.44512	6.26445	4.75938	5.13401	5.54114
ENSG00000041988.15_4	THAP3	chr1:6684926-6695646	+	protein_coding	2.91651	3.9402	3.81267	3.88173	4.86443	3.77451
ENSG00000042088.13_3	TDP1	chr14:90421283-90511112	+	protein_coding	3.03291	2.52627	2.33883	1.9314	2.33239	2.1971
ENSG00000042286.14_2	AIFM2	chr10:71857979-71892690	-	protein_coding	14.417	15.5001	14.4424	13.1647	13.6518	13.2213
ENSG00000042317.16_3	SPATA7	chr14:88851268-88936694	+	protein_coding	0.739575	0.548805	0.55081	0.202269	0.227682	0.271489
ENSG00000042429.11_3	MED17	chr11:93517393-93548129	+	protein_coding	5.12402	4.9369	5.10739	5.98969	6.41538	6.81769
ENSG00000042445.13_3	RETSAT	chr2:85569211-85581743	-	protein_coding	15.5362	19.9098	21.4039	9.09978	12.9106	10.7031
ENSG00000042493.15_2	CAPG	chr2:85621871-85645555	-	protein_coding	26.8021	20.4286	19.4219	25.1288	25.4957	23.8035
ENSG00000042753.11_2	AP2S1	chr19:47341393-47354249	-	protein_coding	29.3929	33.0024	34.1306	49.3237	58.0458	43.5852
ENSG00000043093.13_3	DCUN1D1	chr3:182655862-182703741	-	protein_coding	8.3031	7.77077	8.72	11.8461	9.67556	10.7024
ENSG00000043143.20_2	JADE2	chr5:133860003-133918920	+	protein_coding	12.0966	15.4218	12.942	14.8025	14.589	14.8543
ENSG00000043355.11_3	ZIC2	chr13:100634026-100639027	+	protein_coding	15.8471	15.2458	17.501	10.8547	11.0872	10.9617
ENSG00000043514.15_2	TRIT1	chr1:40306694-40349183	-	protein_coding	12.6999	11.6671	11.5068	8.33172	9.15614	10.1751
ENSG00000043591.5_3	ADRB1	chr10:115803815-115806667	+	protein_coding	0.413876	0.304093	0.275746	0.666889	0.859756	0.840828
ENSG00000044090.8_2	CUL7	chr6:43005355-43021683	-	protein_coding	5.14638	4.31367	4.15355	2.33226	2.87047	3.28554
ENSG00000044115.20_3	CTNNA1	chr5:137946656-138270723	+	protein_coding	34.2707	33.6347	30.6804	29.2469	39.2437	29.1463
ENSG00000044446.11_2	PHKA2	chrX:18910418-19002716	-	protein_coding	3.60915	3.19143	3.69615	2.23119	1.94522	2.75525
ENSG00000044459.14_3	CNTLN	chr9:17134980-17503921	+	protein_coding	5.4431	5.02171	4.29006	2.02622	1.55505	2.19699
ENSG00000044574.7_2	HSPA5	chr9:127997132-128003609	-	protein_coding	191.143	183.494	173.278	194.919	209.126	182.305
ENSG00000046604.12_2	DSG2	chr18:29078006-29128971	+	protein_coding	35.0685	36.0938	34.9504	41.1534	35.9128	36.7416
ENSG00000046647.13_2	GEMIN8	chrX:14026398-14048012	-	protein_coding	3.55862	2.86433	3.39866	1.85129	1.69453	2.06332
ENSG00000046651.14_3	OFD1	chrX:13752864-13787472	+	protein_coding	25.075	22.3862	21.0239	17.1266	14.6538	18.7231
ENSG00000047056.14_2	WDR37	chr10:1095478-1178237	+	protein_coding	1.26901	2.26622	2.43402	1.49222	1.37782	1.87727
ENSG00000047188.15_2	YTHDC2	chr5:112849380-112930982	+	protein_coding	5.17458	4.7491	4.62403	2.69871	2.15101	3.10635
ENSG00000047230.14_2	CTPS2	chrX:16606126-16731059	-	protein_coding	10.5764	10.1024	10.8011	6.04337	5.52157	5.75011
ENSG00000047249.17_4	ATP6V1H	chr8:54628117-54756118	-	protein_coding	5.96293	6.28411	4.0017	4.09323	4.94025	4.48371
ENSG00000047315.15_2	POLR2B	chr4:57843888-57897334	+	protein_coding	23.0436	22.2174	22.3573	26.1039	25.8178	26.3038
ENSG00000047346.12_3	FAM214A	chr15:52873514-53002014	-	protein_coding	2.44236	2.28053	2.32832	2.71304	1.85111	2.64187
ENSG00000047365.11_3	ARAP2	chr4:35949843-36246131	-	protein_coding	2.19934	2.35445	2.27332	1.23356	1.12793	1.28095
ENSG00000047410.13_2	TPR	chr1:186280784-186344825	-	protein_coding	36.7157	31.652	30.0567	17.3228	9.30313	18.7792
ENSG00000047578.12_4	KIAA0556	chr16:27561454-27791690	+	protein_coding	2.733	2.73773	2.64076	2.01312	1.89473	2.65732
ENSG00000047579.19_2	DTNBP1	chr6:15523032-15663289	-	protein_coding	6.47827	4.77397	4.56228	4.92802	5.70664	5.86673
ENSG00000047597.5_3	XK	chrX:37545012-37591383	+	protein_coding	4.53111	5.2182	4.82925	1.92287	2.20983	2.05782
ENSG00000047617.14_3	ANO2	chr12:5641035-6055398	-	protein_coding	0.657108	0.80134	0.600012	0.121104	0.158248	0.118584
ENSG00000047621.11_3	C12orf4	chr12:4596894-4647674	-	protein_coding	2.08286	2.1822	2.26979	1.91576	1.80777	1.66985
ENSG00000047634.14_3	SCML1	chrX:17755569-17773108	+	protein_coding	20.1887	20.6297	13.4682	19.0179	12.84	21.4089
ENSG00000047644.18_3	WWC3	chrX:9983602-10112518	+	protein_coding	13.4173	14.7545	13.8742	8.79987	7.43687	7.65699
ENSG00000047648.21_3	ARHGAP6	chrX:11155663-11683821	-	protein_coding	0.300514	0.468588	0.31751	1.0226	0.770745	0.979867
ENSG00000047849.21_4	MAP4	chr3:47892180-48130762	-	protein_coding	27.6662	27.2227	27.9975	19.7863	19.2192	18.8601
ENSG00000047932.13_3	GOPC	chr6:117881432-117923705	-	protein_coding	28.765	26.6898	25.4601	5.36115	16.6644	19.4335
ENSG00000048028.11_3	USP28	chr11:113668596-113746292	-	protein_coding	10.7804	10.647	10.2284	5.62348	5.44958	6.85955
ENSG00000048140.17_3	TSPAN17	chr5:176074388-176086055	+	protein_coding	4.6759	4.98483	4.91954	8.13127	8.89241	7.67205
ENSG00000048162.20_3	NOP16	chr5:175810941-175815976	-	protein_coding	15.0385	13.3296	12.909	10.8715	12.1728	11.965
ENSG00000048342.15_3	CC2D2A	chr4:15471489-15603180	+	protein_coding	1.89097	2.06645	1.88986	1.76556	1.72123	1.91663
ENSG00000048392.11_2	RRM2B	chr8:103216730-103251346	-	protein_coding	4.65194	3.14763	4.87323	4.01607	4.40212	5.30171
ENSG00000048405.9_3	ZNF800	chr7:126986844-127071978	-	protein_coding	4.06354	3.32935	5.88406	5.28354	4.15125	5.73591
ENSG00000048471.13_3	SNX29	chr16:12070594-12668146	+	protein_coding	1.03262	0.966371	1.13842	3.48731	3.19669	3.25274
ENSG00000048544.5_2	MRPS10	chr6:42174539-42185603	-	protein_coding	44.3544	43.9354	45.2372	38.5616	39.4558	35.6622
ENSG00000048649.13_3	RSF1	chr11:77371041-77532063	-	protein_coding	10.4836	9.4042	9.97345	5.9783	4.3781	6.09943
ENSG00000048707.13_3	VPS13D	chr1:12290124-12572099	+	protein_coding	2.86186	2.68637	2.59789	2.79143	2.22633	2.44365
ENSG00000048828.16_3	FAM120A	chr9:96214004-96328389	+	protein_coding	32.4194	31.8485	30.1167	24.2495	23.1563	22.3938
ENSG00000048991.16_2	R3HDM1	chr2:136289025-136482840	+	protein_coding	5.18968	5.02779	5.06183	5.24909	4.55771	5.27024
ENSG00000049130.14_2	KITLG	chr12:88886570-88974628	-	protein_coding	6.75678	7.05126	6.7865	12.03	10.915	11.1017
ENSG00000049167.13_3	ERCC8	chr5:60169658-60240900	-	protein_coding	3.14393	2.70191	3.21717	2.79497	2.61308	2.62972
ENSG00000049192.14_3	ADAMTS6	chr5:64444563-64777747	-	protein_coding	0.408487	0.386904	0.528006	0.716839	0.687392	0.601293
ENSG00000049239.12_2	H6PD	chr1:9294834-9331396	+	protein_coding	2.0714	1.8989	1.9772	0.459507	0.681572	1.06022
ENSG00000049245.12_3	VAMP3	chr1:7831329-7841492	+	protein_coding	39.9936	36.4829	41.3733	37.1108	37.646	35.0964
ENSG00000049246.14_2	PER3	chr1:7844380-7905237	+	protein_coding	1.92965	1.69439	1.33883	0.463167	0.310296	0.57409
ENSG00000049249.8_3	TNFRSF9	chr1:7975954-8003225	-	protein_coding	1.24143	1.25283	1.31607	3.05474	3.07252	2.79087
ENSG00000049323.15_2	LTBP1	chr2:33172039-33624576	+	protein_coding	4.59987	4.83871	4.39121	8.4221	7.35603	7.00822
ENSG00000049449.8_3	RCN1	chr11:31833939-32127301	+	protein_coding	61.9027	58.7166	54.6099	44.317	32.3737	44.9534
ENSG00000049541.10_3	RFC2	chr7:73645829-73668788	-	protein_coding	15.7973	15.7745	20.2239	11.809	16.8881	11.858
ENSG00000049618.22_3	ARID1B	chr6:157098508-157531913	+	protein_coding	1.21664	0.637235	1.04442	0.497122	0.395304	0.520195
ENSG00000049656.13_2	CLPTM1L	chr5:1317859-1345214	-	protein_coding	27.1744	31.6732	34.1554	27.2846	29.0348	23.7566
ENSG00000049759.17_3	NEDD4L	chr18:55711599-56068772	+	protein_coding	3.35062	3.1606	3.6455	3.74948	3.66017	3.79542
ENSG00000049769.12_3	PPP1R3F	chrX:49126306-49157940	+	protein_coding	0.381557	0.435174	0.417889	1.49349	1.44526	1.98174
ENSG00000049860.13_3	HEXB	chr5:73935848-74018472	+	protein_coding	21.6879	21.4777	22.8955	17.1073	17.1255	13.435
ENSG00000049883.14_3	PTCD2	chr5:71616194-71664222	+	protein_coding	2.90401	2.31337	2.47961	1.05536	1.04081	1.60274
ENSG00000050130.17_2	JKAMP	chr14:59951161-59972128	+	protein_coding	7.87643	5.43911	7.38088	5.18857	4.60843	5.89756
ENSG00000050165.17_2	DKK3	chr11:11984653-12031316	-	protein_coding	1.64541	1.48961	1.27449	2.69736	2.49217	2.64912
ENSG00000050327.14_3	ARHGEF5	chr7:144052381-144077725	+	protein_coding	5.20183	5.59351	4.82108	6.93686	6.90828	7.00877
ENSG00000050344.8_2	NFE2L3	chr7:26191860-26226745	+	protein_coding	5.54598	4.3486	4.96598	7.36683	8.50503	7.13004
ENSG00000050393.11_3	MCUR1	chr6:13786789-13814800	-	protein_coding	10.597	9.52919	10.202	8.77275	9.21446	8.09052
ENSG00000050405.13_3	LIMA1	chr12:50569571-50677329	-	protein_coding	31.4257	38.4526	37.7948	47.2663	47.3329	44.0466
ENSG00000050426.15_4	LETMD1	chr12:51441745-51454207	+	protein_coding	11.0851	11.4695	11.4629	4.22344	3.12101	5.78322
ENSG00000050555.17_3	LAMC3	chr9:133884469-133969860	+	protein_coding	1.9604	1.96619	1.80775	1.52271	1.26351	1.58531
ENSG00000050748.17_4	MAPK9	chr5:179660143-179719099	-	protein_coding	10.0236	9.99263	8.99417	10.6939	10.1406	10.6225
ENSG00000050820.16_4	BCAR1	chr16:75262085-75301951	-	protein_coding	6.21684	6.53859	7.46395	11.1823	11.3525	12.9089
ENSG00000051009.10_2	FAM160A2	chr11:6232565-6255941	-	protein_coding	4.62652	4.86806	5.17042	3.83576	3.85231	4.1924
ENSG00000051108.14_4	HERPUD1	chr16:56965960-56978775	+	protein_coding	12.7744	16.1346	9.68329	8.37948	7.24317	5.73592
ENSG00000051128.18_3	HOMER3	chr19:19040010-19052070	-	protein_coding	8.09585	7.53908	7.69726	9.19671	8.55013	10.8852
ENSG00000051180.16_2	RAD51	chr15:40986972-41024537	+	protein_coding	14.1893	15.4664	12.2543	9.4289	10.4215	10.0839
ENSG00000051341.13_2	POLQ	chr3:121150274-121265488	-	protein_coding	4.19881	3.94364	3.69915	2.93333	2.22769	3.4541
ENSG00000051382.8_2	PIK3CB	chr3:138371541-138553780	-	protein_coding	8.07405	7.17324	6.80073	8.2994	6.20125	7.33111
ENSG00000051523.10_3	CYBA	chr16:88709691-88717560	-	protein_coding	28.4571	27.6126	28.8609	24.8379	25.1833	21.2418
ENSG00000051596.9_3	THOC3	chr5:175344876-175461683	-	protein_coding	6.86137	6.74769	6.12969	7.67786	7.86524	7.61396
ENSG00000051620.10_2	HEBP2	chr6:138724668-138743334	+	protein_coding	1.36319	1.23352	1.3116	2.11915	2.15169	2.50425
ENSG00000051825.14_4	MPHOSPH9	chr12:123636867-123728561	-	protein_coding	3.44829	3.24596	2.89999	2.62178	2.41313	2.57621
ENSG00000052126.14_3	PLEKHA5	chr12:19282686-19529334	+	protein_coding	3.77008	2.61654	2.91918	3.41598	2.33911	3.0948
ENSG00000052344.15_2	PRSS8	chr16:31142754-31147083	-	protein_coding	1.94313	3.02127	2.54449	6.42311	6.66657	5.62022
ENSG00000052723.11_3	SIKE1	chr1:115312100-115323306	-	protein_coding	14.2241	14.3778	13.7326	10.5782	9.49365	13.2989
ENSG00000052749.13_4	RRP12	chr10:99116115-99185833	-	protein_coding	4.96803	4.6393	5.07685	3.42543	3.67269	3.26764
ENSG00000052795.12_3	FNIP2	chr4:159690290-159829201	+	protein_coding	0.719086	0.688397	0.875006	0.678668	0.73122	0.88221
ENSG00000052802.12_3	MSMO1	chr4:166248775-166264312	+	protein_coding	13.989	18.0297	13.3183	45.8955	45.2927	44.8478
ENSG00000052841.14_3	TTC17	chr11:43380482-43516483	+	protein_coding	4.22303	4.44757	4.52149	2.89145	2.94276	3.09202
ENSG00000053254.15_3	FOXN3	chr14:89591215-90085493	-	protein_coding	3.64016	3.28856	3.85256	5.2176	4.9374	4.52629
ENSG00000053371.12_3	AKR7A2	chr1:19630459-19638640	-	protein_coding	10.4823	11.6993	11.4237	10.7962	10.8976	8.11889
ENSG00000053372.4_2	MRTO4	chr1:19578033-19586622	+	protein_coding	34.8645	35.3173	35.9754	21.7552	25.2579	21.3286
ENSG00000053501.12_2	USE1	chr19:17326155-17330638	+	protein_coding	3.9695	4.14419	3.74301	3.42148	3.62714	3.35626
ENSG00000053747.15_3	LAMA3	chr18:21269407-21535030	+	protein_coding	2.32	1.8537	2.05628	1.53217	1.18076	1.4912
ENSG00000053770.11_3	AP5M1	chr14:57735627-57765460	+	protein_coding	2.54365	1.24789	2.60593	3.2009	1.87851	2.28808
ENSG00000053900.10_2	ANAPC4	chr4:25378835-25420120	+	protein_coding	2.83158	2.55641	2.5047	2.5479	1.98636	2.82915
ENSG00000053918.15_3	KCNQ1	chr11:2465914-2870339	+	protein_coding	4.28971	4.82573	4.50541	3.23447	3.51067	2.7279
ENSG00000054116.11_2	TRAPPC3	chr1:36602171-36621654	-	protein_coding	10.8276	13.1515	13.8442	14.9203	15.0475	14.1804
ENSG00000054118.13_3	THRAP3	chr1:36690017-36770958	+	protein_coding	35.3092	39.7347	41.2944	31.1585	28.7271	31.2564
ENSG00000054148.17_3	PHPT1	chr9:139743176-139745479	+	protein_coding	20.5191	22.4873	25.5431	16.4129	18.5949	18.267
ENSG00000054179.11_3	ENTPD2	chr9:139942550-139948497	-	protein_coding	1.06145	1.16002	1.16152	4.80976	4.68795	4.69946
ENSG00000054267.21_3	ARID4B	chr1:235294949-235491534	-	protein_coding	13.8824	13.1741	13.4331	14.8584	15.5124	14.9011
ENSG00000054277.13_3	OPN3	chr1:241753404-241840678	-	protein_coding	7.96854	8.93417	9.18863	5.51976	4.73822	4.17138
ENSG00000054282.15_2	SDCCAG8	chr1:243419336-243663394	+	protein_coding	4.58319	4.14271	3.96063	1.57162	1.39107	1.86302
ENSG00000054392.12_3	HHAT	chr1:210501596-210849638	+	protein_coding	1.06292	1.0033	1.03537	0.446868	0.299734	0.307807
ENSG00000054523.17_3	KIF1B	chr1:10270863-10441661	+	protein_coding	5.29727	5.09749	4.15971	6.50539	6.14949	6.35549
ENSG00000054598.6_2	FOXC1	chr6:1610207-1614132	+	protein_coding	10.5274	9.78942	10.573	9.76259	12.1218	10.5341
ENSG00000054611.13_2	TBC1D22A	chr22:47158514-47571342	+	protein_coding	3.87363	3.76102	3.53805	2.26685	2.42747	2.14609
ENSG00000054654.16_3	SYNE2	chr14:64319701-64693151	+	protein_coding	2.87233	2.82252	2.37612	3.54862	2.49169	3.95046
ENSG00000054793.13_3	ATP9A	chr20:50213053-50385173	-	protein_coding	5.70506	5.53863	5.88132	1.95202	1.39706	1.72829
ENSG00000054965.10_2	FAM168A	chr11:73111532-73309234	-	protein_coding	6.89995	7.45382	7.98062	11.8026	10.4089	11.9457
ENSG00000054967.12_2	RELT	chr11:73087309-73108519	+	protein_coding	3.8323	4.32544	4.29495	3.24411	4.02121	3.81764
ENSG00000055044.10_2	NOP58	chr2:203130439-203168389	+	protein_coding	71.3952	59.2114	56.9862	53.8292	51.2636	49.2759
ENSG00000055070.16_2	SZRD1	chr1:16679070-16724640	+	protein_coding	33.404	13.9296	34.9066	28.0276	17.2416	14.0034
ENSG00000055118.14_2	KCNH2	chr7:150642049-150675403	-	protein_coding	0.113085	0.131099	0.0973852	2.0832	2.518	1.81258
ENSG00000055130.15_2	CUL1	chr7:148395006-148498128	+	protein_coding	40.3616	32.2424	32.6564	28.063	25.2719	24.0578
ENSG00000055147.18_3	FAM114A2	chr5:153369688-153418496	-	protein_coding	1.63814	1.91454	1.40362	1.73078	1.61506	1.88127
ENSG00000055163.19_3	CYFIP2	chr5:156693089-156822603	+	protein_coding	1.30927	1.63139	1.39381	2.52857	2.41151	2.02128
ENSG00000055208.18_3	TAB2	chr6:149539777-149732749	+	protein_coding	19.9196	15.162	18.3988	17.9082	17.1454	18.029
ENSG00000055211.12_2	GINM1	chr6:149887430-149912884	+	protein_coding	15.6914	15.403	14.0641	9.30538	9.57409	8.65136
ENSG00000055332.16_3	EIF2AK2	chr2:37326353-37384208	-	protein_coding	15.9098	14.7358	15.2275	13.4853	11.7707	13.7711
ENSG00000055483.19_4	USP36	chr17:76783463-76837523	-	protein_coding	8.92277	9.57592	9.57834	3.64269	3.50471	3.94529
ENSG00000055609.17_3	KMT2C	chr7:151832007-152133090	-	protein_coding	3.19704	2.43482	2.32346	4.14041	4.23232	4.83534
ENSG00000055813.5_3	CCDC85A	chr2:56411258-56613308	+	protein_coding	0.106274	0.119257	0.055261	0.828019	0.816755	1.25359
ENSG00000055917.15_2	PUM2	chr2:20448452-20551995	-	protein_coding	21.0432	18.3127	21.3531	13.9058	18.3564	15.6809
ENSG00000055950.16_3	MRPL43	chr10:102729215-102747272	-	protein_coding	5.02239	7.71053	6.70665	5.96437	8.3673	6.9072
ENSG00000056050.6_3	HPF1	chr4:170650616-170679104	-	protein_coding	26.5247	21.0431	20.2389	15.8608	14.9845	13.4024
ENSG00000056097.15_2	ZFR	chr5:32354456-32444867	-	protein_coding	29.7248	27.6737	26.8561	27.2206	26.1754	36.2349
ENSG00000056277.15_2	ZNF280C	chrX:129336685-129402873	-	protein_coding	3.98376	3.60119	3.70769	3.7684	2.80614	3.69512
ENSG00000056487.15_3	PHF21B	chr22:45277042-45405880	-	protein_coding	0.163722	0.243835	0.190577	1.23778	1.23273	1.08864
ENSG00000056558.10_2	TRAF1	chr9:123664671-123691451	-	protein_coding	4.21039	3.91352	3.42023	2.40564	1.92772	3.33702
ENSG00000056586.15_3	RC3H2	chr9:125606835-125667620	-	protein_coding	15.4981	14.9065	16.1989	12.9583	11.1804	12.4446
ENSG00000056736.9_3	IL17RB	chr3:53880607-53899827	+	protein_coding	3.65441	3.76742	3.26393	1.7219	0.957906	1.69979
ENSG00000056972.18_3	TRAF3IP2	chr6:111877657-111927481	-	protein_coding	4.00473	4.11325	3.96991	1.95412	2.89274	2.21072
ENSG00000057019.15_3	DCBLD2	chr3:98514785-98620533	-	protein_coding	9.26902	8.50755	10.3342	9.31302	7.65289	8.4857
ENSG00000057252.12_2	SOAT1	chr1:179262849-179327815	+	protein_coding	16.6409	15.9059	17.5952	29.2735	25.8775	27.8896
ENSG00000057294.14_3	PKP2	chr12:32943679-33049774	-	protein_coding	3.86217	4.5755	4.60017	4.21374	4.11129	3.80649
ENSG00000057608.16_3	GDI2	chr10:5807186-5884095	-	protein_coding	53.5173	53.9339	56.5506	39.7556	37.2884	38.1003
ENSG00000057657.15_3	PRDM1	chr6:106534195-106557814	+	protein_coding	2.27442	1.53762	1.64216	4.6771	4.47091	4.73658
ENSG00000057663.14_3	ATG5	chr6:106493298-106773666	-	protein_coding	6.74795	5.82547	6.64838	10.1198	10.1677	10.1763
ENSG00000057757.9_3	PITHD1	chr1:24104895-24114722	+	protein_coding	24.7847	22.4717	20.5573	28.1399	31.1016	26.9054
ENSG00000057935.13_2	MTA3	chr2:42721709-42984087	+	protein_coding	3.6697	3.32031	3.21723	3.55063	3.05788	3.3256
ENSG00000058056.8_2	USP13	chr3:179370543-179507189	+	protein_coding	5.21557	5.16608	5.46069	2.66959	2.64591	2.59081
ENSG00000058063.15_3	ATP11B	chr3:182511288-182639423	+	protein_coding	3.88261	5.45695	6.28707	6.48758	4.08961	5.89289
ENSG00000058085.14_2	LAMC2	chr1:183155373-183214035	+	protein_coding	0.915999	0.664269	0.70764	0.918873	0.904787	1.04711
ENSG00000058091.16_3	CDK14	chr7:90095738-90839905	+	protein_coding	6.31941	6.82272	6.13979	5.82293	6.53439	5.43095
ENSG00000058262.9_2	SEC61A1	chr3:127770484-127790526	+	protein_coding	24.6012	74.1007	30.1276	41.3833	81.6539	26.8703
ENSG00000058272.16_3	PPP1R12A	chr12:80167343-80329240	-	protein_coding	10.1677	10.0111	10.61	14.1321	13.9032	15.353
ENSG00000058335.15_2	RASGRF1	chr15:79252289-79383115	-	protein_coding	0.776572	0.883902	0.781278	0.503469	0.426858	0.514715
ENSG00000058453.16_3	CROCC	chr1:17066768-17299474	+	protein_coding	1.33877	1.03196	1.03867	0.839402	0.789959	1.1705
ENSG00000058600.15_4	POLR3E	chr16:22308696-22346424	+	protein_coding	6.15892	5.60646	5.61499	3.27072	3.57467	4.18899
ENSG00000058668.14_3	ATP2B4	chr1:203595689-203713209	+	protein_coding	5.84166	13.38	5.14152	9.66518	23.4534	9.04752
ENSG00000058673.16_3	ZC3H11A	chr1:203764782-203824127	+	protein_coding	34.71	35.165	35.2291	35.9332	32.9766	34.3843
ENSG00000058729.10_3	RIOK2	chr5:96496571-96518964	-	protein_coding	6.49392	5.72486	7.21782	9.00322	7.2218	7.52287
ENSG00000058799.14_2	YIPF1	chr1:54317392-54355507	-	protein_coding	5.85966	5.30832	5.86483	12.2347	11.999	10.2377
ENSG00000058804.11_2	NDC1	chr1:54231133-54304533	-	protein_coding	26.4667	25.3184	26.2489	32.1576	34.7629	29.0844
ENSG00000059122.16_2	FLYWCH1	chr16:2961938-3001209	+	protein_coding	5.10222	4.78737	4.74699	8.19058	9.24162	8.5018
ENSG00000059145.18_4	UNKL	chr16:1413206-1464752	-	protein_coding	3.59882	3.54242	2.98077	2.67996	2.45228	3.46671
ENSG00000059378.12_2	PARP12	chr7:139723544-139763521	-	protein_coding	8.92437	7.10672	6.58156	4.84262	4.49507	5.44464
ENSG00000059573.8_2	ALDH18A1	chr10:97365686-97416463	-	protein_coding	25.4038	25.9922	25.5689	18.8954	18.3327	16.7417
ENSG00000059588.9_2	TARBP1	chr1:234527059-234614849	-	protein_coding	8.80222	8.06657	7.71201	4.67261	4.11331	5.35931
ENSG00000059691.11_3	GATB	chr4:152591656-152682175	-	protein_coding	0.91426	0.975452	1.0594	1.05953	0.895963	1.01024
ENSG00000059728.10_3	MXD1	chr2:70124820-70170077	+	protein_coding	3.12937	0.412898	0.58073	1.6511	7.5616	2.04322
ENSG00000059758.7_3	CDK17	chr12:96672039-96794338	-	protein_coding	10.473	9.97208	10.3761	14.5206	14.6197	13.8555
ENSG00000059769.19_3	DNAJC25	chr9:114393632-114416631	+	protein_coding	4.07086	3.55694	3.85128	4.20265	4.40401	6.07327
ENSG00000059804.15_2	SLC2A3	chr12:8071826-8088871	-	protein_coding	4.77376	3.50195	4.33598	9.08255	8.70815	9.13397
ENSG00000060069.16_2	CTDP1	chr18:77439801-77516623	+	protein_coding	2.24245	2.16188	2.18218	2.65062	2.91342	2.59643
ENSG00000060138.12_2	YBX3	chr12:10851688-10875911	-	protein_coding	22.4878	20.4337	20.505	11.3788	16.274	15.8062
ENSG00000060237.16_3	WNK1	chr12:861759-1020618	+	protein_coding	6.59621	7.04804	6.98491	7.76773	7.14384	9.02754
ENSG00000060339.13_3	CCAR1	chr10:70480769-70552134	+	protein_coding	52.3944	49.335	48.6953	57.3204	49.4105	62.8025
ENSG00000060491.16_3	OGFR	chr20:61436187-61445352	+	protein_coding	9.2348	20.8967	19.9239	23.7975	26.7865	25.6164
ENSG00000060566.13_2	CREB3L3	chr19:4153598-4173051	+	protein_coding	2.62501	1.07303	2.6158	15.7905	13.4402	5.23091
ENSG00000060642.10_3	PIGV	chr1:27113963-27124889	+	protein_coding	3.37657	3.79331	2.80682	1.50874	1.73334	2.9136
ENSG00000060656.19_2	PTPRU	chr1:29563028-29653325	+	protein_coding	6.68353	6.34084	6.09829	5.53917	5.44635	5.73427
ENSG00000060688.12_3	SNRNP40	chr1:31732415-31769629	-	protein_coding	16.2141	15.0675	13.7814	13.7484	14.395	11.8668
ENSG00000060749.14_2	QSER1	chr11:32914724-33014862	+	protein_coding	22.6464	18.3832	26.8336	21.7597	16.4681	20.6363
ENSG00000060762.18_2	MPC1	chr6:166778407-166796501	-	protein_coding	5.73485	4.69503	4.998	9.38236	8.84303	7.52577
ENSG00000060971.17_3	ACAA1	chr3:38144620-38178733	-	protein_coding	1.93576	2.03903	2.03599	3.06772	3.45222	3.4891
ENSG00000061273.17_3	HDAC7	chr12:48176505-48226915	-	protein_coding	11.9229	12.8078	11.2801	8.1254	8.08643	7.26947
ENSG00000061656.9_3	SPAG4	chr20:34203814-34208971	+	protein_coding	0.555781	0.165882	0.699087	0.425859	0.703615	0.910526
ENSG00000061676.14_2	NCKAP1	chr2:183773843-183903586	-	protein_coding	10.2694	9.51018	9.37063	10.741	9.98736	9.8133
ENSG00000061794.12_3	MRPS35	chr12:27863706-27909228	+	protein_coding	84.5174	79.5969	82.2364	84.5757	87.7213	81.2467
ENSG00000061936.9_3	SFSWAP	chr12:132195626-132284282	+	protein_coding	5.53537	5.05877	4.55682	3.93982	4.07314	3.94703
ENSG00000061938.17_4	TNK2	chr3:195590235-195638816	-	protein_coding	2.98719	2.8766	2.87041	3.44265	3.05788	4.04795
ENSG00000061987.15_3	MON2	chr12:62860597-62994259	+	protein_coding	2.17127	2.07483	2.11856	2.37219	2.07488	2.54248
ENSG00000062038.13_3	CDH3	chr16:68670092-68756519	+	protein_coding	0.935704	0.8239	0.818605	0.304788	0.267832	0.235084
ENSG00000062194.15_2	GPBP1	chr5:56469775-56560506	+	protein_coding	19.703	19.2021	21.0101	29.0147	29.0553	29.5334
ENSG00000062282.14_3	DGAT2	chr11:75470557-75512580	+	protein_coding	2.54423	2.66266	2.74523	2.65224	2.34523	2.37082
ENSG00000062370.16_3	ZNF112	chr19:44830708-44871377	-	protein_coding	3.52886	3.47693	3.59571	3.72928	2.83907	4.55807
ENSG00000062485.18_3	CS	chr12:56665483-56694176	-	protein_coding	6.63826	7.27645	25.8865	5.25037	21.3275	18.675
ENSG00000062582.13_3	MRPS24	chr7:43906157-43909492	-	protein_coding	15.3365	18.4737	16.945	27.0021	32.4434	29.5086
ENSG00000062598.17_4	ELMO2	chr20:44994688-45061624	-	protein_coding	3.88629	2.71244	2.91475	5.68892	5.34644	5.88316
ENSG00000062650.18_3	WAPL	chr10:88195013-88281572	-	protein_coding	20.636	19.4945	17.1552	18.0385	18.3937	17.8794
ENSG00000062716.12_3	VMP1	chr17:57784553-57919616	+	protein_coding	41.3319	33.5373	38.2815	32.0815	32.1482	31.8061
ENSG00000062725.9_2	APPBP2	chr17:58520510-58603580	-	protein_coding	4.90064	4.80645	4.46613	3.98219	3.08458	3.76308
ENSG00000062822.12_3	POLD1	chr19:50887461-50921275	+	protein_coding	8.16421	8.82147	8.95487	8.21579	8.88706	8.72153
ENSG00000063046.17_3	EIF4B	chr12:53399942-53435993	+	protein_coding	239.098	245.818	240.865	151.131	155.721	144.005
ENSG00000063127.15_3	SLC6A16	chr19:49792895-49828482	-	protein_coding	0.634216	0.692104	0.943777	0.278862	0.345425	0.64833
ENSG00000063169.10_4	BICRA	chr19:48111453-48206534	+	protein_coding	1.37087	1.38838	1.5273	1.97597	2.30323	2.3734
ENSG00000063176.15_4	SPHK2	chr19:49122548-49133974	+	protein_coding	0.677037	0.650938	0.611062	1.65111	2.14753	1.71854
ENSG00000063177.12_3	RPL18	chr19:49118585-49122793	-	protein_coding	52.5876	57.4822	55.88	48.3201	61.8913	48.4281
ENSG00000063180.8_2	CA11	chr19:49141199-49149569	-	protein_coding	2.50948	2.92841	3.12093	4.74196	4.13563	4.78237
ENSG00000063241.7_3	ISOC2	chr19:55964352-55973710	-	protein_coding	1.92511	2.18605	2.29952	3.5557	3.99942	3.63341
ENSG00000063244.12_3	U2AF2	chr19:56165512-56186081	+	protein_coding	24.1741	25.1917	25.7847	32.8499	31.92	30.2816
ENSG00000063245.14_3	EPN1	chr19:56186592-56221224	+	protein_coding	3.27474	3.57212	3.24404	3.05075	3.54784	3.17474
ENSG00000063322.13_2	MED29	chr19:39881943-39891277	+	protein_coding	11.5722	1.49033	1.51277	9.61718	9.1633	1.18385
ENSG00000063438.16_3	AHRR	chr5:304291-438406	+	protein_coding	7.26253	9.4345	7.743	9.1463	8.70009	11.0443
ENSG00000063587.13_3	ZNF275	chrX:152599613-152625568	+	protein_coding	3.67973	3.62104	3.94925	2.593	2.18491	2.52799
ENSG00000063601.16_3	MTMR1	chrX:149861444-149933576	+	protein_coding	9.20509	9.32163	9.07612	6.22013	5.6359	5.88898
ENSG00000063660.8_3	GPC1	chr2:241375088-241407495	+	protein_coding	5.6702	6.12484	5.43704	6.9317	7.02253	6.37181
ENSG00000063854.12_2	HAGH	chr16:1845621-1877195	-	protein_coding	5.31793	5.44993	4.55218	5.20795	6.44287	4.42459
ENSG00000063978.15_3	RNF4	chr4:2463947-2627047	+	protein_coding	2.40582	2.25254	2.08291	1.96843	7.09286	2.09473
ENSG00000064012.21_4	CASP8	chr2:202098166-202152434	+	protein_coding	9.13706	8.15057	8.36189	6.31453	3.75076	7.80003
ENSG00000064042.17_3	LIMCH1	chr4:41361624-41702061	+	protein_coding	30.2	23.5662	26.4659	15.7337	14.1103	14.7477
ENSG00000064102.14_2	INTS13	chr12:27058114-27091259	-	protein_coding	36.3696	30.1177	29.3928	36.1698	33.696	31.2421
ENSG00000064115.10_3	TM7SF3	chr12:27126128-27167367	-	protein_coding	10.2426	10.3258	12.6544	16.1594	13.923	14.807
ENSG00000064195.7_2	DLX3	chr17:48067369-48072588	-	protein_coding	1.67756	1.62653	1.40368	7.33764	8.20829	6.99868
ENSG00000064199.6_2	SPA17	chr11:124543694-124567414	+	protein_coding	0.976757	0.82526	0.80572	0.854595	0.989318	0.642718
ENSG00000064205.10_2	WISP2	chr20:43343485-43357150	+	protein_coding	9.57342	11.6409	7.64809	3.58773	3.75447	3.28799
ENSG00000064300.8_3	NGFR	chr17:47572655-47592379	+	protein_coding	0	0.0145844	0	1.37836	1.97206	1.33281
ENSG00000064309.14_2	CDON	chr11:125825691-125933230	-	protein_coding	0.34725	0.337421	0.381	1.80146	1.40503	1.57748
ENSG00000064313.11_3	TAF2	chr8:120743015-120845103	-	protein_coding	8.16412	7.41591	7.23445	7.60805	6.80875	7.59633
ENSG00000064393.15_2	HIPK2	chr7:139246316-139477577	-	protein_coding	5.30419	5.1059	5.37037	7.97227	5.61543	7.45815
ENSG00000064419.13_2	TNPO3	chr7:128594234-128695227	-	protein_coding	29.7836	30.4226	27.8632	27.0977	31.3213	26.3244
ENSG00000064489.22_3	BORCS8-MEF2B	chr19:19256376-19302967	-	protein_coding	2.23056	2.16015	2.44101	0.531946	1.14849	1.03265
ENSG00000064490.13_3	RFXANK	chr19:19303038-19312678	+	protein_coding	6.9256	9.74366	7.41687	4.66882	4.47384	5.8463
ENSG00000064545.14_4	TMEM161A	chr19:19229978-19249322	-	protein_coding	2.48036	2.11325	2.00655	1.66908	2.18139	2.30304
ENSG00000064547.13_3	LPAR2	chr19:19734477-19739739	-	protein_coding	4.2712	4.46583	4.45096	2.64539	2.55015	2.8832
ENSG00000064601.16_2	CTSA	chr20:44518783-44527459	+	protein_coding	14.2917	14.8908	15.5669	17.1996	16.0662	14.3299
ENSG00000064607.16_2	SUGP2	chr19:19101697-19144832	-	protein_coding	9.87161	6.99367	7.23032	8.14962	8.48238	8.59129
ENSG00000064651.13_3	SLC12A2	chr5:127419458-127525380	+	protein_coding	1.78268	1.60874	1.81394	6.08822	5.0881	5.20679
ENSG00000064652.10_2	SNX24	chr5:122179134-122365049	+	protein_coding	11.1926	8.75961	5.993	5.32407	5.38456	5.0723
ENSG00000064666.14_3	CNN2	chr19:1026580-1039067	+	protein_coding	9.49369	9.71937	9.54746	11.5342	11.1865	9.77963
ENSG00000064687.12_1	ABCA7	chr19:1040100-1065571	+	protein_coding	1.74093	1.96727	1.54665	1.94595	2.02896	2.55553
ENSG00000064703.11_2	DDX20	chr1:112297867-112310638	+	protein_coding	3.86508	3.14749	3.39714	3.74695	3.58857	3.80377
ENSG00000064726.9_3	BTBD1	chr15:83685174-83736106	-	protein_coding	55.6456	53.5316	53.5172	60.2754	59.0509	55.5823
ENSG00000064932.15_2	SBNO2	chr19:1107635-1174282	-	protein_coding	12.5194	14.0022	12.6667	10.6916	12.249	10.1787
ENSG00000064933.17_3	PMS1	chr2:190648811-190742355	+	protein_coding	3.27991	3.34858	2.61768	1.68219	1.4516	1.69859
ENSG00000064961.18_3	HMG20B	chr19:3572775-3579086	+	protein_coding	49.7895	49.2598	47.1158	28.8181	35.1761	20.8786
ENSG00000064995.16_2	TAF11	chr6:34845555-34855866	-	protein_coding	30.7425	28.5703	26.7972	29.0583	28.7094	28.6152
ENSG00000064999.13_3	ANKS1A	chr6:34857042-35059190	+	protein_coding	4.29542	3.8669	3.78121	6.09787	6.03839	6.00125
ENSG00000065000.15_3	AP3D1	chr19:2100987-2164464	-	protein_coding	8.70049	7.03821	6.61423	8.72381	8.02898	7.44431
ENSG00000065029.14_3	ZNF76	chr6:35226686-35263762	+	protein_coding	1.4146	1.34345	1.42718	0.464698	0.384852	0.43149
ENSG00000065054.13_3	SLC9A3R2	chr16:2075357-2089027	+	protein_coding	17.3572	16.1915	15.2902	17.9186	17.9106	17.0658
ENSG00000065057.7_3	NTHL1	chr16:2089816-2097867	-	protein_coding	8.85592	10.3869	8.82241	10.4769	11.8787	10.1995
ENSG00000065060.16_2	UHRF1BP1	chr6:34759792-34850915	+	protein_coding	12.6963	13.9875	13.2437	7.65303	6.75367	7.9943
ENSG00000065135.10_3	GNAI3	chr1:110091233-110160943	+	protein_coding	7.2908	6.87753	7.12381	8.73622	8.31559	8.58309
ENSG00000065150.18_3	IPO5	chr13:98605912-98676551	+	protein_coding	58.8621	56.2915	58.1726	45.9022	41.4978	38.3122
ENSG00000065154.11_2	OAT	chr10:126085872-126107545	-	protein_coding	34.2617	39.2941	37.2536	44.4604	52.4551	44.6823
ENSG00000065183.15_2	WDR3	chr1:118472343-118509165	+	protein_coding	12.0579	10.0476	9.98335	6.95714	6.92386	6.63553
ENSG00000065243.19_3	PKN2	chr1:89149905-89301938	+	protein_coding	17.4911	14.0597	27.3085	24.1697	20.6708	24.0786
ENSG00000065268.10_3	WDR18	chr19:984271-998437	+	protein_coding	4.34375	4.89611	4.63056	4.72846	4.81559	4.63157
ENSG00000065308.4_2	TRAM2	chr6:52362200-52441713	-	protein_coding	18.0021	18.5608	19.1846	19.5255	18.7786	21.3981
ENSG00000065320.8_2	NTN1	chr17:8924859-9147317	+	protein_coding	0.0247068	0.00951353	0.0406323	1.03266	0.889898	1.01768
ENSG00000065325.12_2	GLP2R	chr17:9725523-9795419	+	protein_coding	2.59871	4.12105	2.77644	7.13961	6.60523	6.59306
ENSG00000065328.16_2	MCM10	chr10:13203554-13253104	+	protein_coding	6.16518	5.68992	5.67963	6.1729	4.71909	5.65851
ENSG00000065357.19_3	DGKA	chr12:56321103-56347811	+	protein_coding	6.62896	5.19404	5.12107	2.88677	2.79623	3.09416
ENSG00000065361.14_3	ERBB3	chr12:56473641-56497289	+	protein_coding	6.86986	5.97135	6.00503	5.92961	5.60802	6.29244
ENSG00000065427.14_4	KARS	chr16:75661372-75682541	-	protein_coding	35.5869	38.5715	41.8271	36.5736	39.7878	32.2187
ENSG00000065457.10_3	ADAT1	chr16:75630879-75657198	-	protein_coding	4.38132	3.99283	4.12357	4.14388	4.29267	4.20742
ENSG00000065485.19_3	PDIA5	chr3:122785909-122944074	+	protein_coding	7.39438	6.97252	5.80371	9.92514	9.84858	11.0754
ENSG00000065491.8_2	TBC1D22B	chr6:37225548-37300746	+	protein_coding	7.2139	6.7814	7.28467	6.86611	7.50665	7.17595
ENSG00000065518.7_2	NDUFB4	chr3:120315156-120321347	+	protein_coding	19.3091	23.4131	25.9475	26.5263	25.7991	24.6549
ENSG00000065526.10_2	SPEN	chr1:16174359-16266955	+	protein_coding	16.1871	15.7656	14.7859	24.0738	19.6813	29.4578
ENSG00000065534.18_3	MYLK	chr3:123328896-123603178	-	protein_coding	2.42548	2.75215	2.1752	1.64431	1.26711	1.10504
ENSG00000065548.17_3	ZC3H15	chr2:187350883-187374090	+	protein_coding	38.6674	30.51	29.0184	37.5112	37.2533	34.0841
ENSG00000065559.14_3	MAP2K4	chr17:11924141-12047147	+	protein_coding	5.89199	7.22789	6.08235	7.21905	6.98053	6.72787
ENSG00000065600.12_3	TMEM206	chr1:212537273-212588243	-	protein_coding	4.31759	4.27461	2.17308	7.08229	8.46381	8.23622
ENSG00000065613.13_3	SLK	chr10:105726959-105788991	+	protein_coding	24.4593	21.0286	22.3212	22.9394	18.4576	22.1665
ENSG00000065615.13_2	CYB5R4	chr6:84569362-84677143	+	protein_coding	2.57551	2.40537	2.59471	4.12121	3.73167	3.89669
ENSG00000065618.18_3	COL17A1	chr10:105791044-105845760	-	protein_coding	0.193539	0.164038	0.195772	0.610923	0.74148	0.62644
ENSG00000065665.20_3	SEC61A2	chr10:12171636-12211960	+	protein_coding	1.03546	0.873081	0.878497	1.75683	1.53691	1.6736
ENSG00000065717.14_3	TLE2	chr19:2997636-3047633	-	protein_coding	0.792444	0.728166	0.691659	2.76122	2.62594	2.11553
ENSG00000065802.11_2	ASB1	chr2:239335383-239360891	+	protein_coding	5.58187	2.84675	6.66374	2.62428	2.35128	2.51795
ENSG00000065809.13_3	FAM107B	chr10:14560556-14816896	-	protein_coding	13.3061	12.8447	11.3515	34.1961	34.6376	33.4871
ENSG00000065833.8_2	ME1	chr6:83920108-84140790	-	protein_coding	9.37718	11.0076	7.52398	27.8329	26.1302	25.713
ENSG00000065882.15_3	TBC1D1	chr4:37892708-38140796	+	protein_coding	3.44986	3.2906	2.90567	3.76729	3.57627	3.63952
ENSG00000065883.14_2	CDK13	chr7:39989636-40136733	+	protein_coding	7.23883	7.59935	7.53747	8.4679	8.08529	7.7324
ENSG00000065911.11_2	MTHFD2	chr2:74425689-74444692	+	protein_coding	90.4292	98.8388	90.4314	52.9221	52.9645	52.0895
ENSG00000065923.9_3	SLC9A7	chrX:46458687-46618607	-	protein_coding	4.19959	4.05812	3.97286	4.10461	3.18348	5.51673
ENSG00000065970.8_2	FOXJ2	chr12:8185299-8208099	+	protein_coding	4.17602	3.76378	3.88469	4.96084	4.34731	4.69944
ENSG00000065978.18_3	YBX1	chr1:43148098-43168020	+	protein_coding	418.617	431.376	412.737	407.695	442.087	395.529
ENSG00000065989.15_2	PDE4A	chr19:10527449-10580307	+	protein_coding	1.5364	1.38595	1.22114	5.20871	3.32422	4.93313
ENSG00000066027.11_3	PPP2R5A	chr1:212458879-212535205	+	protein_coding	21.6015	21.688	21.5533	22.3453	22.7776	20.3225
ENSG00000066044.14_3	ELAVL1	chr19:8023463-8070543	-	protein_coding	16.569	18.2433	18.0012	20.9804	21.6709	18.7401
ENSG00000066084.12_2	DIP2B	chr12:50898768-51142450	+	protein_coding	10.8886	10.0728	11.1616	12.8651	11.5286	12.159
ENSG00000066117.14_2	SMARCD1	chr12:50478755-50494495	+	protein_coding	14.8809	16.9346	15.6065	12.429	13.07	13.4382
ENSG00000066135.12_2	KDM4A	chr1:44115829-44171186	+	protein_coding	10.5465	10.2294	9.95917	14.3015	13.709	13.5707
ENSG00000066136.20_3	NFYC	chr1:41157320-41237275	+	protein_coding	4.03974	4.53296	3.81451	5.09941	4.93821	5.29513
ENSG00000066248.14_2	NGEF	chr2:233743396-233877982	-	protein_coding	3.98204	3.19105	3.61483	3.05465	2.85342	2.68389
ENSG00000066279.17_3	ASPM	chr1:197053258-197115824	-	protein_coding	27.5004	24.3969	27.0862	26.3917	14.2257	28.3647
ENSG00000066322.14_3	ELOVL1	chr1:43829068-43833745	-	protein_coding	8.67478	11.4097	10.4364	12.9807	12.7854	10.8381
ENSG00000066379.14_2	ZNRD1	chr6:30026676-30032686	+	protein_coding	7.52997	5.9381	7.50694	6.29379	7.46027	7.48827
ENSG00000066422.4_2	ZBTB11	chr3:101367733-101396339	-	protein_coding	9.60985	8.78035	8.2461	12.2391	11.1206	11.4821
ENSG00000066427.21_3	ATXN3	chr14:92504996-92572965	-	protein_coding	0.888891	0.568942	0.660084	0.515179	0.558024	0.703201
ENSG00000066455.12_2	GOLGA5	chr14:93260576-93306308	+	protein_coding	17.7803	16.6275	16.0696	15.0857	15.1024	14.2442
ENSG00000066557.5_2	LRRC40	chr1:70610488-70671303	-	protein_coding	16.9282	14.6929	16.1166	17.492	16.1772	17.6934
ENSG00000066583.11_3	ISOC1	chr5:128430444-128449721	+	protein_coding	18.8421	17.5347	16.6413	17.2839	19.5336	16.086
ENSG00000066629.16_3	EML1	chr14:100204030-100408397	+	protein_coding	1.95364	1.84215	1.69387	1.15001	1.36808	1.08217
ENSG00000066651.18_3	TRMT11	chr6:126307576-126360422	+	protein_coding	13.1737	13.3195	11.9514	10.6124	9.27079	10.0759
ENSG00000066654.13_3	THUMPD1	chr16:20714138-20753406	-	protein_coding	14.1055	13.2526	14.481	12.8019	11.4139	13.3615
ENSG00000066697.14_3	MSANTD3	chr9:103189438-103213993	+	protein_coding	12.3977	10.9415	7.48964	17.2159	15.7347	15.6354
ENSG00000066735.14_3	KIF26A	chr14:104605060-104647231	+	protein_coding	9.1075	10.5968	9.77026	7.39054	7.63874	6.74333
ENSG00000066739.11_2	ATG2B	chr14:96745539-96830207	-	protein_coding	2.44848	2.49433	2.51613	2.52667	2.14251	2.40852
ENSG00000066777.8_3	ARFGEF1	chr8:68085746-68255912	-	protein_coding	6.32876	4.72818	4.64836	4.50703	4.30803	4.2603
ENSG00000066827.15_2	ZFAT	chr8:135490031-135725292	-	protein_coding	0.681017	0.922394	0.712752	0.927677	1.01538	0.746718
ENSG00000066855.15_2	MTFR1	chr8:66556969-66683496	+	protein_coding	9.48753	8.34937	8.62055	14.3817	14.1179	13.7166
ENSG00000066926.10_2	FECH	chr18:55215515-55254004	-	protein_coding	4.70079	5.89482	4.10041	3.06195	2.33398	1.9231
ENSG00000066933.15_3	MYO9A	chr15:72114630-72410918	-	protein_coding	1.75602	1.54193	1.91272	1.43352	1.17217	1.58328
ENSG00000067057.16_3	PFKP	chr10:3108525-3179904	+	protein_coding	51.2704	59.2116	49.7671	52.1222	55.9368	48.9118
ENSG00000067064.10_3	IDI1	chr10:1085848-1095110	-	protein_coding	19.0784	22.4694	16.1016	30.0403	27.6937	28.5141
ENSG00000067066.16_3	SP100	chr2:231280657-231408805	+	protein_coding	3.42752	3.13322	3.04952	2.58218	2.36884	2.50842
ENSG00000067082.14_2	KLF6	chr10:3818188-3827473	-	protein_coding	13.0933	10.0146	12.6922	11.541	11.4479	12.4146
ENSG00000067113.16_3	PLPP1	chr5:54720682-54830878	-	protein_coding	7.42116	6.67361	7.41726	26.0917	28.7831	24.9974
ENSG00000067141.16_2	NEO1	chr15:73344051-73597547	+	protein_coding	1.41347	1.47467	1.35312	4.91488	4.46236	4.25991
ENSG00000067167.7_2	TRAM1	chr8:71485677-71520622	-	protein_coding	68.6247	72.3981	68.6805	75.258	81.0797	69.6896
ENSG00000067177.14_2	PHKA1	chrX:71798664-71934167	-	protein_coding	8.9959	8.21113	8.24985	7.78609	7.31845	6.699
ENSG00000067182.7_2	TNFRSF1A	chr12:6437923-6451280	-	protein_coding	10.2076	12.9221	11.2382	11.7551	13.8218	11.5733
ENSG00000067191.15_2	CACNB1	chr17:37329709-37353956	-	protein_coding	1.18955	1.15955	1.24184	1.48754	1.74868	1.9561
ENSG00000067208.14_3	EVI5	chr1:92974253-93257961	-	protein_coding	6.02979	5.0642	5.42209	6.93301	6.2189	7.122
ENSG00000067225.17_4	PKM	chr15:72491370-72524163	-	protein_coding	89.5701	90.094	93.3135	158.653	170.57	151.801
ENSG00000067248.9_2	DHX29	chr5:54552073-54603550	-	protein_coding	14.1764	13.6509	14.1023	19.5598	19.4072	18.2084
ENSG00000067334.13_2	DNTTIP2	chr1:94331839-94345474	-	protein_coding	16.1902	12.2729	13.2446	16.6011	15.5497	17.4315
ENSG00000067365.14_3	METTL22	chr16:8715540-8743511	+	protein_coding	1.68305	1.31043	1.58324	0.761173	0.931639	1.31437
ENSG00000067369.13_3	TP53BP1	chr15:43695259-43802926	-	protein_coding	6.10238	6.60007	5.46169	7.86995	6.55126	8.29492
ENSG00000067533.5_2	RRP15	chr1:218458629-218511325	+	protein_coding	11.0109	9.75943	10.3024	6.96841	6.72274	6.59898
ENSG00000067560.10_3	RHOA	chr3:49396578-49450431	-	protein_coding	189.039	204.205	198.027	168.671	200.595	158.768
ENSG00000067596.10_3	DHX8	chr17:41561233-41621831	+	protein_coding	6.96941	7.79788	7.01779	11.9988	12.4853	11.576
ENSG00000067606.16_3	PRKCZ	chr1:1981909-2116834	+	protein_coding	5.21989	5.62388	3.97408	2.71534	3.07365	2.74691
ENSG00000067704.9_2	IARS2	chr1:220267444-220321383	+	protein_coding	54.3009	54.6577	49.5833	46.4947	46.5776	40.9225
ENSG00000067715.13_3	SYT1	chr12:79257773-79845788	+	protein_coding	0.453976	0.264547	0.507582	0.795464	0.686653	1.18666
ENSG00000067798.14_3	NAV3	chr12:77718421-78606788	+	protein_coding	0.658384	0.561959	0.922591	0.460652	0.420908	0.404139
ENSG00000067829.18_3	IDH3G	chrX:153051221-153059978	-	protein_coding	13.8896	14.7903	13.8045	13.6022	16.664	13.4137
ENSG00000067836.12_2	ROGDI	chr16:4846969-4852951	-	protein_coding	1.68285	1.47825	1.62291	2.81482	3.24458	2.8743
ENSG00000067840.12_2	PDZD4	chrX:153067621-153096020	-	protein_coding	2.33232	2.18033	1.93129	4.25077	4.19122	4.64345
ENSG00000067900.7_3	ROCK1	chr18:18526867-18691812	-	protein_coding	13.6704	11.704	11.9368	10.4317	11.6275	14.832
ENSG00000067955.13_3	CBFB	chr16:67063019-67134961	+	protein_coding	25.9535	18.0873	26.0836	25.6035	23.927	23.7527
ENSG00000067992.12_3	PDK3	chrX:24483338-24557954	+	protein_coding	1.63633	1.24834	1.75491	3.41331	3.49094	3.41305
ENSG00000068001.13_3	HYAL2	chr3:50355221-50360337	-	protein_coding	3.02177	2.93711	2.71746	5.48226	5.82436	4.7624
ENSG00000068024.16_3	HDAC4	chr2:239969864-240323348	-	protein_coding	1.19737	1.27921	1.056	1.21825	1.0821	1.26887
ENSG00000068028.17_2	RASSF1	chr3:50367213-50378411	-	protein_coding	12.7831	12.305	11.6188	7.65401	5.66836	8.83688
ENSG00000068078.17_3	FGFR3	chr4:1795034-1810599	+	protein_coding	3.83905	5.05526	3.60302	3.76197	4.75698	4.24218
ENSG00000068079.7_2	IFI35	chr17:41158742-41166473	+	protein_coding	7.01376	8.55732	6.58001	5.90327	7.17469	5.66124
ENSG00000068097.14_3	HEATR6	chr17:58120555-58156292	-	protein_coding	5.02267	5.10522	4.34687	2.93495	2.02238	4.13667
ENSG00000068120.14_3	COASY	chr17:40713485-40718295	+	protein_coding	15.2085	15.4399	15.4854	24.4906	28.6333	24.9187
ENSG00000068137.14_2	PLEKHH3	chr17:40819932-40829012	-	protein_coding	3.20155	3.36301	2.65821	4.70022	5.75835	4.98971
ENSG00000068305.17_3	MEF2A	chr15:100105622-100256671	+	protein_coding	5.64561	5.71618	5.33038	7.57208	8.22096	8.84595
ENSG00000068308.13_3	OTUD5	chrX:48779305-48815648	-	protein_coding	23.4848	27.3191	28.2326	29.6298	28.4276	28.5229
ENSG00000068323.16_2	TFE3	chrX:48886237-48901012	-	protein_coding	24.3004	27.894	25.3854	30.0241	31.8137	30.7041
ENSG00000068354.15_3	TBC1D25	chrX:48397845-48420997	+	protein_coding	6.36586	7.04629	6.73816	8.55497	10.2166	10.2361
ENSG00000068366.19_3	ACSL4	chrX:108867473-108976632	-	protein_coding	29.538	27.2057	29.0571	37.6894	32.6078	33.8623
ENSG00000068383.18_2	INPP5A	chr10:134351324-134596984	+	protein_coding	3.98701	4.67672	3.83823	5.57709	6.1754	4.81948
ENSG00000068394.10_2	GPKOW	chrX:48970327-48980151	-	protein_coding	37.6631	32.5425	32.159	41.5642	44.3635	39.2302
ENSG00000068400.13_3	GRIPAP1	chrX:48830131-48858675	-	protein_coding	16.4294	14.5552	13.6603	12.2372	11.7711	12.824
ENSG00000068438.14_2	FTSJ1	chrX:48334409-48344752	+	protein_coding	29.8678	22.0605	30.1432	20.3919	20.5014	18.6639
ENSG00000068489.12_3	PRR11	chr17:57232860-57282066	+	protein_coding	31.3685	30.0482	36.7046	28.2186	26.2874	25.4729
ENSG00000068615.17_3	REEP1	chr2:86441116-86565206	-	protein_coding	1.63292	1.67198	1.3955	3.47206	2.67353	2.63052
ENSG00000068650.18_3	ATP11A	chr13:113344643-113541482	+	protein_coding	2.57292	3.48789	3.12006	3.40953	2.34286	3.66247
ENSG00000068654.15_2	POLR1A	chr2:86247339-86333278	-	protein_coding	4.16083	4.18174	4.30604	4.00155	3.45322	3.87139
ENSG00000068697.6_2	LAPTM4A	chr2:20232411-20251789	-	protein_coding	88.0999	91.5101	106.98	177.167	198.452	156.616
ENSG00000068724.15_3	TTC7A	chr2:47143296-47303276	+	protein_coding	14.563	11.9846	13.9482	6.41645	6.78016	10.8607
ENSG00000068745.14_2	IP6K2	chr3:48725436-48777786	-	protein_coding	9.95733	9.60572	8.16168	11.598	16.5763	16.1114
ENSG00000068784.12_2	SRBD1	chr2:45615819-45839304	-	protein_coding	5.90527	4.79664	4.63035	3.09513	2.7371	3.33201
ENSG00000068796.16_3	KIF2A	chr5:61601989-61833076	+	protein_coding	22.8564	14.767	19.2341	23.5058	16.3425	22.5468
ENSG00000068831.18_3	RASGRP2	chr11:64494383-64512928	-	protein_coding	0.00887644	0.00984821	0.0237162	0.493768	0.621247	0.627202
ENSG00000068878.14_2	PSME4	chr2:54091204-54197977	-	protein_coding	17.6543	16.5435	16.1646	20.1219	20.0371	19.9729
ENSG00000068885.14_4	IFT80	chr3:159974774-160117668	-	protein_coding	9.251	10.012	8.47941	5.65973	4.16238	6.71825
ENSG00000068903.19_3	SIRT2	chr19:39369195-39390502	-	protein_coding	2.86339	2.88898	3.11717	3.91921	4.17861	4.08533
ENSG00000068912.13_3	ERLEC1	chr2:54014181-54045956	+	protein_coding	56.9611	50.1509	48.3841	44.3181	42.1127	41.6696
ENSG00000068971.13_3	PPP2R5B	chr11:64685025-64701945	+	protein_coding	1.10988	1.08052	1.19194	5.79624	5.39214	6.1438
ENSG00000069011.15_2	PITX1	chr5:134363425-134370503	-	protein_coding	11.5605	11.8755	12.2046	16.0789	20.9249	15.1798
ENSG00000069248.11_2	NUP133	chr1:229576007-229644088	-	protein_coding	16.542	15.1437	14.7281	13.5851	12.5237	13.4311
ENSG00000069275.12_2	NUCKS1	chr1:205681947-205719404	-	protein_coding	134.044	135.692	135.042	69.437	60.1393	62.7329
ENSG00000069329.16_3	VPS35	chr16:46690044-46723430	-	protein_coding	27.4131	25.1194	26.2644	22.0726	24.0538	20.101
ENSG00000069345.11_2	DNAJA2	chr16:46989274-47007699	-	protein_coding	30.1236	27.2453	27.6113	30.2443	33.929	27.6505
ENSG00000069399.14_3	BCL3	chr19:45250962-45263301	+	protein_coding	4.71723	5.74025	5.64229	3.50759	4.29227	3.73616
ENSG00000069424.14_2	KCNAB2	chr1:6051526-6161253	+	protein_coding	7.14126	8.55206	8.16111	6.44446	6.61914	5.90371
ENSG00000069482.6_2	GAL	chr11:68451247-68458643	+	protein_coding	13.0445	12.6023	13.3679	43.3633	52.1171	44.0084
ENSG00000069509.5_2	FUNDC1	chrX:44382885-44402247	-	protein_coding	25.9836	23.43	23.1995	30.8071	30.5419	30.2804
ENSG00000069535.13_2	MAOB	chrX:43625858-43741693	-	protein_coding	13.161	14.3004	12.2559	7.96425	7.04299	7.31173
ENSG00000069667.15_3	RORA	chr15:60780483-61521518	-	protein_coding	0.37005	0.339353	0.418286	0.58143	0.45659	0.659952
ENSG00000069702.10_2	TGFBR3	chr1:92145900-92371892	-	protein_coding	5.16343	5.6586	4.71689	10.4478	10.9327	9.82382
ENSG00000069812.11_2	HES2	chr1:6472478-6484730	-	protein_coding	5.36663	4.65165	5.17468	10.1524	9.96901	10.8759
ENSG00000069849.10_2	ATP1B3	chr3:141594966-141645356	+	protein_coding	39.1453	56.5857	51.2479	155.279	123.354	107.687
ENSG00000069869.15_2	NEDD4	chr15:56119120-56285944	-	protein_coding	13.0505	14.4194	13.4725	14.7317	13.4884	15.034
ENSG00000069943.9_2	PIGB	chr15:55611158-55647846	+	protein_coding	5.79218	5.52687	5.34295	3.44976	3.29723	3.44606
ENSG00000069956.11_3	MAPK6	chr15:52244303-52359569	+	protein_coding	27.42	26.7866	26.6618	24.0804	21.12	24.3771
ENSG00000069966.18_2	GNB5	chr15:52407302-52483566	-	protein_coding	3.00209	3.70122	4.01825	4.25103	2.71782	4.0913
ENSG00000069974.15_3	RAB27A	chr15:55495164-55611311	-	protein_coding	6.10755	4.16078	5.4574	4.15553	4.35205	4.49024
ENSG00000069998.12_2	HDHD5	chr22:17618401-17646177	-	protein_coding	5.48805	3.16313	5.12307	4.26792	2.60121	3.34076
ENSG00000070010.18_4	UFD1	chr22:19437433-19466738	-	protein_coding	5.0194	5.10425	5.05058	8.67263	8.58469	9.68211
ENSG00000070018.8_2	LRP6	chr12:12268959-12419946	-	protein_coding	5.70886	5.11183	5.17028	7.31761	6.32118	7.50368
ENSG00000070047.11_2	PHRF1	chr11:576486-612222	+	protein_coding	7.04146	6.75718	6.5455	4.57644	4.79557	5.01826
ENSG00000070061.14_3	ELP1	chr9:111629797-111696396	-	protein_coding	10.3681	10.1483	8.17916	13.7599	12.7434	13.0935
ENSG00000070081.15_3	NUCB2	chr11:17229700-17371521	+	protein_coding	8.17694	6.88168	6.53057	10.119	7.88084	9.51282
ENSG00000070087.13_3	PFN2	chr3:149682691-149768575	-	protein_coding	24.5144	29.8762	29.4557	30.4643	32.841	28.0463
ENSG00000070159.13_2	PTPN3	chr9:112137746-112260593	-	protein_coding	3.47726	3.09815	3.30284	4.64458	4.64982	3.25123
ENSG00000070190.12_3	DAPP1	chr4:100737990-100791311	+	protein_coding	0.628134	0.641616	0.735333	0.335709	0.397404	0.311784
ENSG00000070214.15_2	SLC44A1	chr9:108006903-108201452	+	protein_coding	8.727	8.47207	8.82384	9.74161	8.57881	8.71676
ENSG00000070269.13_3	TMEM260	chr14:56955072-57117324	+	protein_coding	0.643321	1.05865	0.566975	0.568722	0.517874	0.617458
ENSG00000070366.13_3	SMG6	chr17:1963133-2207065	-	protein_coding	3.13522	2.98487	3.36955	1.34501	1.98555	2.16135
ENSG00000070367.15_2	EXOC5	chr14:57667225-57735726	-	protein_coding	5.69327	5.7966	6.46422	8.18456	7.06309	7.32498
ENSG00000070371.15_3	CLTCL1	chr22:19166986-19279239	-	protein_coding	1.74649	1.42948	1.55325	0.477417	0.579495	0.613239
ENSG00000070404.9_3	FSTL3	chr19:676365-683399	+	protein_coding	24.8091	27.6746	26.375	8.44331	11.1043	8.06443
ENSG00000070413.19_3	DGCR2	chr22:19023795-19109967	-	protein_coding	3.0041	3.10981	3.13844	2.41856	2.17107	1.93587
ENSG00000070423.17_2	RNF126	chr19:647526-663277	-	protein_coding	5.67611	6.30167	5.84722	5.35393	7.59757	10.1653
ENSG00000070444.14_2	MNT	chr17:2287354-2304412	-	protein_coding	7.76611	7.27911	7.58032	6.57433	5.09851	9.29698
ENSG00000070476.14_2	ZXDC	chr3:126156444-126194762	-	protein_coding	3.2569	4.41238	3.93297	2.27931	3.27958	3.4752
ENSG00000070495.14_2	JMJD6	chr17:74708914-74722881	-	protein_coding	6.83394	6.38247	6.20566	13.832	13.3076	12.0802
ENSG00000070501.11_2	POLB	chr8:42195972-42229326	+	protein_coding	5.15096	4.3945	4.44116	5.25484	4.99248	5.03546
ENSG00000070540.12_2	WIPI1	chr17:66417089-66453654	-	protein_coding	5.16703	4.91406	4.19526	5.2067	3.86135	3.93339
ENSG00000070610.14_3	GBA2	chr9:35736863-35749225	-	protein_coding	4.0208	4.2814	3.64988	4.33386	4.66444	4.92665
ENSG00000070614.14_3	NDST1	chr5:149865381-149937773	+	protein_coding	3.52453	4.42062	4.22393	1.40849	3.29706	3.63331
ENSG00000070669.16_3	ASNS	chr7:97481430-97501854	-	protein_coding	49.4725	47.9167	45.2561	20.4847	24.0132	21.3994
ENSG00000070718.11_3	AP3M2	chr8:42010464-42029191	+	protein_coding	4.67658	3.81748	4.76384	3.08252	2.68984	3.35342
ENSG00000070729.13_2	CNGB1	chr16:57916244-58005020	-	protein_coding	0.808279	0.638462	0.585627	0.87975	0.839825	1.05553
ENSG00000070731.10_3	ST6GALNAC2	chr17:74561461-74583038	-	protein_coding	1.089	0.859278	0.813104	0.271778	0.0524122	0.305233
ENSG00000070756.15_3	PABPC1	chr8:101698044-101735037	-	protein_coding	150.463	151.513	125.842	105.184	96.2736	99.1052
ENSG00000070759.16_2	TESK2	chr1:45809555-45956838	-	protein_coding	2.48624	2.28833	2.75542	6.60909	6.98766	6.82714
ENSG00000070761.7_2	CFAP20	chr16:58147492-58163354	-	protein_coding	15.5735	15.9165	16.2948	18.0816	19.5597	17.6775
ENSG00000070770.8_3	CSNK2A2	chr16:58191811-58231824	-	protein_coding	19.4729	18.3988	17.6713	17.5321	17.758	17.8921
ENSG00000070778.12_2	PTPN21	chr14:88932122-89021077	-	protein_coding	3.03316	2.80872	2.67599	1.89595	1.78282	1.89843
ENSG00000070785.16_3	EIF2B3	chr1:45316194-45452394	-	protein_coding	9.20021	7.39433	7.5294	6.89541	7.72533	6.93269
ENSG00000070814.17_3	TCOF1	chr5:149737202-149779871	+	protein_coding	9.24744	9.25258	9.28561	8.29914	8.40627	7.27988
ENSG00000070831.15_4	CDC42	chr1:22379120-22419439	+	protein_coding	77.3823	78.6164	89.662	110.532	116.119	101.792
ENSG00000070882.12_3	OSBPL3	chr7:24836158-25021253	-	protein_coding	5.6706	5.87824	5.77833	6.12207	5.32507	7.35953
ENSG00000070950.9_3	RAD18	chr3:8817088-9005457	-	protein_coding	11.6682	11.1923	10.9304	6.24738	5.77785	6.75292
ENSG00000070961.15_2	ATP2B1	chr12:89981826-90103077	-	protein_coding	15.5605	14.6748	15.6386	15.0901	12.7381	14.9263
ENSG00000071051.13_3	NCK2	chr2:106361354-106510730	+	protein_coding	2.01062	2.0136	2.02812	2.22348	2.69616	2.29876
ENSG00000071054.16_3	MAP4K4	chr2:102313312-102511151	+	protein_coding	11.1828	10.4464	10.5933	10.8379	9.36016	10.479
ENSG00000071073.12_2	MGAT4A	chr2:99235569-99347589	-	protein_coding	2.03748	2.7223	2.70002	2.9758	2.94724	2.12643
ENSG00000071082.10_2	RPL31	chr2:101618177-101640494	+	protein_coding	80.9569	93.2835	91.1353	68.6762	95.3742	74.7359
ENSG00000071127.16_2	WDR1	chr4:10075963-10118573	-	protein_coding	23.5559	25.5612	20.7827	27.8054	33.2325	28.0085
ENSG00000071189.21_2	SNX13	chr7:17830385-17980124	-	protein_coding	2.15271	1.95214	1.90175	1.9816	1.49678	2.06202
ENSG00000071205.11_2	ARHGAP10	chr4:148653214-148993931	+	protein_coding	1.74625	1.5467	1.55466	1.2433	1.40566	1.16711
ENSG00000071243.15_2	ING3	chr7:120590803-120617270	+	protein_coding	5.08723	4.96095	5.27072	4.87132	4.5229	5.23126
ENSG00000071246.10_3	VASH1	chr14:77228532-77249358	+	protein_coding	6.16506	5.37086	5.7356	7.56053	5.47636	9.91577
ENSG00000071282.11_2	LMCD1	chr3:8543393-8616359	+	protein_coding	1.04351	1.39027	1.44275	1.87021	1.94504	2.07502
ENSG00000071462.11_4	BUD23	chr7:73097355-73119491	+	protein_coding	6.04645	7.18587	6.61574	4.77741	6.03308	5.04512
ENSG00000071537.13_3	SEL1L	chr14:81937893-82000205	-	protein_coding	8.12898	7.19291	8.44936	7.53954	6.42295	6.79595
ENSG00000071539.13_3	TRIP13	chr5:892758-919472	+	protein_coding	47.1085	45.5795	43.0169	25.0478	23.6421	24.8674
ENSG00000071553.16_3	ATP6AP1	chrX:153656978-153664862	+	protein_coding	9.68532	9.80619	10.2203	11.0399	10.7118	9.58613
ENSG00000071564.14_3	TCF3	chr19:1609289-1652604	-	protein_coding	13.4762	13.2036	12.5819	11.7007	12.5293	12.3457
ENSG00000071575.11_2	TRIB2	chr2:12857015-12882860	+	protein_coding	0	0.0130591	0.0120102	1.13959	1.3256	1.38756
ENSG00000071626.16_3	DAZAP1	chr19:1407568-1435686	+	protein_coding	16.5091	15.1339	16.1166	12.7551	14.6406	13.8402
ENSG00000071655.17_3	MBD3	chr19:1573595-1592800	-	protein_coding	3.73573	3.99862	4.0501	5.47887	5.02108	5.76078
ENSG00000071794.15_2	HLTF	chr3:148747914-148804341	-	protein_coding	45.4754	45.9533	42.9277	49.5889	40.6244	42.9674
ENSG00000071859.14_2	FAM50A	chrX:153672473-153679002	+	protein_coding	33.2216	30.8456	28.2618	36.457	37.0758	35.5325
ENSG00000071889.16_3	FAM3A	chrX:153734490-153744566	-	protein_coding	2.8282	3.2829	3.09023	2.06216	1.6971	1.83972
ENSG00000071894.16_3	CPSF1	chr8:145618444-145634733	-	protein_coding	7.77361	8.13044	7.69825	7.47115	8.435	8.1746
ENSG00000071967.11_2	CYBRD1	chr2:172378757-172414643	+	protein_coding	4.57369	15.2516	3.56366	3.87333	10.3081	11.4788
ENSG00000071994.10_3	PDCD2	chr6:170884383-170893780	-	protein_coding	5.71604	6.3253	5.49894	4.43347	5.43308	4.60598
ENSG00000072042.12_3	RDH11	chr14:68143518-68162531	-	protein_coding	8.77322	7.85793	7.72871	13.1925	12.3425	13.5679
ENSG00000072062.13_2	PRKACA	chr19:14202500-14228896	-	protein_coding	7.51918	8.17555	4.22968	8.5089	8.34953	4.34122
ENSG00000072071.16_2	ADGRL1	chr19:14258555-14316999	-	protein_coding	0.00662791	0.049323	0.0214863	0.675387	0.59696	0.577937
ENSG00000072110.13_4	ACTN1	chr14:69340860-69446157	-	protein_coding	15.9306	16.3891	14.6512	15.1669	15.1605	14.8531
ENSG00000072121.15_3	ZFYVE26	chr14:68194091-68283307	-	protein_coding	1.55427	1.47514	1.38077	0.970934	0.780139	1.0824
ENSG00000072134.15_3	EPN2	chr17:19118928-19240028	+	protein_coding	5.1886	2.54152	4.44586	4.64482	4.00524	4.88399
ENSG00000072135.12_3	PTPN18	chr2:131113580-131132982	+	protein_coding	6.27415	5.81052	6.07047	2.38258	2.3287	2.65362
ENSG00000072163.19_3	LIMS2	chr2:128395956-128439360	-	protein_coding	1.67409	1.38459	1.58224	1.40171	1.20639	1.88758
ENSG00000072195.14_1	SPEG	chr2:220299568-220363009	+	protein_coding	0.279104	0.347818	0.38419	0.607979	0.546122	0.692909
ENSG00000072210.18_3	ALDH3A2	chr17:19551449-19580911	+	protein_coding	12.5597	7.51261	6.16047	10.6845	10.4953	10.6301
ENSG00000072274.12_2	TFRC	chr3:195754054-195809060	-	protein_coding	47.952	41.2211	46.7307	54.5446	54.5655	48.9347
ENSG00000072310.16_3	SREBF1	chr17:17713713-17740316	-	protein_coding	3.45116	3.40155	2.88721	3.38662	3.60892	3.81001
ENSG00000072364.12_2	AFF4	chr5:132211071-132299326	-	protein_coding	13.7285	13.3887	14.2795	17.3281	15.5408	18.4792
ENSG00000072401.14_2	UBE2D1	chr10:60094735-60130513	+	protein_coding	11.3167	11.1859	18.1659	20.3088	21.2877	20.4285
ENSG00000072415.8_3	MPP5	chr14:67707826-67802536	+	protein_coding	9.66633	11.0146	10.2125	9.01445	9.6828	9.03649
ENSG00000072422.16_2	RHOBTB1	chr10:62629196-62761198	-	protein_coding	5.03145	4.21068	4.49145	1.96572	1.64009	2.00112
ENSG00000072501.17_2	SMC1A	chrX:53401070-53449677	-	protein_coding	47.3153	47.9043	43.983	31.9188	29.225	30.512
ENSG00000072506.12_3	HSD17B10	chrX:53458206-53461320	-	protein_coding	114.195	111.847	109.248	126.303	130.912	107.352
ENSG00000072518.20_2	MARK2	chr11:63606400-63678491	+	protein_coding	3.0061	3.44142	3.33162	4.53987	5.20977	4.43772
ENSG00000072571.19_3	HMMR	chr5:162887209-162918951	+	protein_coding	23.3081	19.1184	21.4515	15.1557	11.723	15.0515
ENSG00000072682.18_3	P4HA2	chr5:131527531-131631008	-	protein_coding	3.08828	2.5704	2.73644	8.88473	8.61863	8.16688
ENSG00000072736.18_3	NFATC3	chr16:68118654-68263162	+	protein_coding	6.3403	6.25927	6.30413	9.26828	5.85748	5.82718
ENSG00000072756.16_2	TRNT1	chr3:3168600-3192563	+	protein_coding	8.17082	6.63155	6.2998	3.9127	3.50424	4.04839
ENSG00000072778.19_2	ACADVL	chr17:7120444-7128592	+	protein_coding	33.5567	43.9418	34.9333	32.1506	30.9836	31.4512
ENSG00000072786.12_2	STK10	chr5:171469077-171615390	-	protein_coding	8.23453	8.95255	8.48457	9.1027	9.6012	9.01876
ENSG00000072803.17_2	FBXW11	chr5:171288553-171433877	-	protein_coding	17.3028	18.3408	19.2349	24.3564	18.2746	17.5394
ENSG00000072832.14_3	CRMP1	chr4:5749811-5894785	-	protein_coding	0.143882	0.123441	0.106755	2.18485	3.4975	2.9901
ENSG00000072840.12_2	EVC	chr4:5712924-5816032	+	protein_coding	2.34487	2.3747	2.51786	0.747866	0.593575	0.749523
ENSG00000072849.10_3	DERL2	chr17:5374571-5390131	-	protein_coding	9.92068	9.04051	7.81097	7.63676	5.20925	8.01018
ENSG00000072864.14_3	NDE1	chr16:15737124-15820210	+	protein_coding	4.87389	4.59465	4.16337	4.59125	4.41701	4.28305
ENSG00000072954.6_2	TMEM38A	chr19:16771938-16800840	+	protein_coding	1.76864	2.06933	2.44371	6.69926	5.92717	5.8927
ENSG00000072958.8_2	AP1M1	chr19:16308389-16356718	+	protein_coding	2.40196	2.10285	2.3667	4.15403	3.7068	3.38606
ENSG00000073008.14_3	PVR	chr19:45147098-45166850	+	protein_coding	6.67119	7.51425	5.83825	4.6615	11.6457	5.02961
ENSG00000073050.11_3	XRCC1	chr19:44047192-44084625	-	protein_coding	16.3273	16.0558	14.5121	7.08565	6.56599	6.69453
ENSG00000073060.15_2	SCARB1	chr12:125261402-125367214	-	protein_coding	5.80286	6.6503	5.73643	5.21037	5.12405	4.70295
ENSG00000073111.13_3	MCM2	chr3:127317066-127341279	+	protein_coding	74.5255	75.5351	75.5567	45.9435	41.8573	39.5567
ENSG00000073150.13_3	PANX2	chr22:50609160-50618723	+	protein_coding	3.05078	3.59151	2.72964	4.58235	4.30268	4.64058
ENSG00000073169.13_2	SELENOO	chr22:50639408-50656045	+	protein_coding	3.92651	4.46809	4.10405	3.91495	4.60494	4.81229
ENSG00000073331.17_3	ALPK1	chr4:113206665-113363776	+	protein_coding	0.848064	0.67159	0.715385	0.876526	0.724499	0.894595
ENSG00000073350.13_2	LLGL2	chr17:73521161-73571289	+	protein_coding	7.45341	8.146	7.5463	5.81307	6.13615	7.41153
ENSG00000073417.14_4	PDE8A	chr15:85523671-85682376	+	protein_coding	9.34187	10.672	8.88739	7.66857	8.31786	9.14795
ENSG00000073464.11_4	CLCN4	chrX:10124985-10205700	+	protein_coding	3.91389	3.33102	4.3758	2.82735	2.81586	2.79315
ENSG00000073536.17_2	NLE1	chr17:33455772-33469334	-	protein_coding	8.31601	8.77946	8.67127	4.21522	4.1262	4.55086
ENSG00000073578.16_3	SDHA	chr5:218356-256815	+	protein_coding	23.1561	35.6895	23.5568	21.2386	21.5986	18.6334
ENSG00000073584.18_3	SMARCE1	chr17:38781214-38804760	-	protein_coding	11.202	10.2362	10.0424	5.79906	5.81461	5.81142
ENSG00000073605.18_3	GSDMB	chr17:38060848-38076107	-	protein_coding	0.364308	0.354312	0.397337	0.337463	0.321608	1.19455
ENSG00000073614.12_3	KDM5A	chr12:389295-498620	-	protein_coding	5.15329	4.76287	5.27123	6.9473	6.28936	6.73905
ENSG00000073711.10_3	PPP2R3A	chr3:135684515-135866733	+	protein_coding	4.71193	4.38223	4.69854	4.01445	1.64888	3.99433
ENSG00000073712.14_3	FERMT2	chr14:53323986-53419153	-	protein_coding	12.5503	7.96774	7.67637	14.1427	8.65486	12.3849
ENSG00000073737.16_3	DHRS9	chr2:169921299-169952677	+	protein_coding	0.0150014	0	0.0146944	0.462377	0.858239	0.488692
ENSG00000073756.11_2	PTGS2	chr1:186640923-186649559	-	protein_coding	2.07247	1.54928	1.68267	23.6581	18.169	21.036
ENSG00000073792.15_2	IGF2BP2	chr3:185361527-185542844	-	protein_coding	10.2818	10.4057	9.02675	14.4796	13.2222	13.691
ENSG00000073803.13_2	MAP3K13	chr3:185000729-185206885	+	protein_coding	1.60822	1.48453	1.73576	1.73126	1.32751	1.56707
ENSG00000073849.14_3	ST6GAL1	chr3:186648274-186796341	+	protein_coding	0.970612	0.97355	0.342769	1.54441	1.76778	1.52562
ENSG00000073921.17_3	PICALM	chr11:85668727-85780924	-	protein_coding	51.2922	50.3127	52.5662	69.5166	63.9634	63.2235
ENSG00000073969.18_3	NSF	chr17:44668035-44834830	+	protein_coding	7.40116	7.71846	7.51418	13.5134	11.4639	11.4405
ENSG00000074047.21_3	GLI2	chr2:121493199-121750229	+	protein_coding	3.06236	0.979713	2.60527	0.928402	2.70878	3.43087
ENSG00000074054.17_3	CLASP1	chr2:122095352-122407163	-	protein_coding	7.58956	6.95115	7.62007	9.68639	8.29791	9.79691
ENSG00000074071.14_3	MRPS34	chr16:1821891-1823156	-	protein_coding	53.349	53.624	47.6889	61.3825	76.9691	63.519
ENSG00000074181.8_2	NOTCH3	chr19:15269849-15311792	-	protein_coding	1.09163	0.652307	0.777536	4.51322	3.60983	3.46858
ENSG00000074201.8_2	CLNS1A	chr11:77225981-77348850	-	protein_coding	41.8168	34.7403	32.9026	21.646	21.3819	20.498
ENSG00000074211.13_2	PPP2R2C	chr4:6322305-6565327	-	protein_coding	3.81073	3.56481	3.64462	5.61057	1.74687	5.45397
ENSG00000074219.13_3	TEAD2	chr19:49843852-49865714	-	protein_coding	7.27918	6.468	6.63049	8.96151	9.4531	9.4504
ENSG00000074266.19_3	EED	chr11:85955586-85989855	+	protein_coding	9.73621	10.4436	8.97349	9.4754	10.5303	9.80979
ENSG00000074319.12_3	TSG101	chr11:18489883-18548779	-	protein_coding	16.6578	14.2702	14.6415	9.41863	9.44926	8.25296
ENSG00000074356.16_2	NCBP3	chr17:3705459-3749545	-	protein_coding	4.39504	3.17699	3.56184	1.89556	1.63268	2.13784
ENSG00000074370.17_2	ATP2A3	chr17:3827164-3867758	-	protein_coding	1.03935	0.979141	0.854716	2.66992	2.95075	2.69748
ENSG00000074410.13_2	CA12	chr15:63613577-63674360	-	protein_coding	5.78449	8.58917	8.72332	13.1184	10.7823	16.2111
ENSG00000074416.13_4	MGLL	chr3:127407905-127542093	-	protein_coding	11.9142	14.5719	14.9085	13.1278	13.0308	12.1293
ENSG00000074527.11_2	NTN4	chr12:96051583-96184930	-	protein_coding	20.2881	17.4501	19.5305	27.5624	23.8678	27.8502
ENSG00000074582.12_2	BCS1L	chr2:219523487-219528166	+	protein_coding	2.70765	2.26296	3.00232	3.20324	3.79427	4.01512
ENSG00000074590.13_3	NUAK1	chr12:106457118-106533811	-	protein_coding	9.4987	10.1282	9.65153	11.7523	13.6314	12.1791
ENSG00000074603.18_3	DPP8	chr15:65734801-65810042	-	protein_coding	6.95566	6.40778	6.79768	6.01442	4.80824	5.91276
ENSG00000074657.13_3	ZNF532	chr18:56529832-56653712	+	protein_coding	2.34889	2.5795	2.49804	1.84444	0.535736	2.12334
ENSG00000074695.5_2	LMAN1	chr18:56995055-57027194	-	protein_coding	62.9225	62.5143	63.8428	64.8716	55.6713	59.2987
ENSG00000074696.12_2	HACD3	chr15:65822756-65870690	+	protein_coding	23.3896	21.739	21.8906	30.8949	34.8276	28.8972
ENSG00000074755.14_3	ZZEF1	chr17:3907739-4046314	-	protein_coding	2.99764	2.76212	2.71816	1.75285	1.54304	2.07311
ENSG00000074800.13_3	ENO1	chr1:8921061-8939308	-	protein_coding	360.583	392.301	399.656	385.784	479.046	360.569
ENSG00000074842.7_3	MYDGF	chr19:4641386-4670382	-	protein_coding	31.8843	30.4001	31.1197	41.9232	48.7594	36.5417
ENSG00000074855.10_3	ANO8	chr19:17434032-17445638	-	protein_coding	2.59845	2.47588	2.76765	1.87326	1.7337	2.36909
ENSG00000074935.13_2	TUBE1	chr6:112391980-112408732	-	protein_coding	3.116	2.94408	2.69496	1.70175	1.53525	1.87328
ENSG00000074964.16_2	ARHGEF10L	chr1:17866330-18024369	+	protein_coding	3.37781	3.39386	3.30218	1.98898	1.87724	2.23139
ENSG00000074966.10_2	TXK	chr4:48068410-48136273	-	protein_coding	0.430155	0.649853	0.455098	0.256678	0.172529	0.430087
ENSG00000075043.18_3	KCNQ2	chr20:62031563-62104030	-	protein_coding	0.0683162	0.0965593	0.0725156	0.483185	0.513731	0.507082
ENSG00000075089.9_3	ACTR6	chr12:100592900-100635643	+	protein_coding	15.8764	14.9197	14.575	19.7935	19.9343	17.4187
ENSG00000075131.9_4	TIPIN	chr15:66628544-66679084	-	protein_coding	8.31453	7.42009	8.34571	8.10194	6.23288	7.41323
ENSG00000075142.13_2	SRI	chr7:87834433-87856308	-	protein_coding	11.8132	12.6591	12.5664	16.9864	16.9091	16.9699
ENSG00000075151.20_3	EIF4G3	chr1:21132785-21503381	-	protein_coding	21.1272	19.7126	17.201	21.4096	17.316	20.8011
ENSG00000075188.8_3	NUP37	chr12:102466881-102513902	-	protein_coding	14.4051	18.2762	13.7016	10.9969	10.7915	10.3467
ENSG00000075218.18_2	GTSE1	chr22:46692638-46726707	+	protein_coding	8.16634	7.67514	7.65912	11.6436	12.3024	10.658
ENSG00000075223.13_2	SEMA3C	chr7:80371854-80551675	-	protein_coding	6.29358	6.40446	7.10109	11.2732	8.96442	10.1183
ENSG00000075234.16_3	TTC38	chr22:46663858-46689905	+	protein_coding	6.8328	7.5095	7.16549	6.04137	6.38727	5.98333
ENSG00000075239.13_2	ACAT1	chr11:107992243-108018503	+	protein_coding	19.0132	18.3518	16.3249	7.63622	7.72025	6.81608
ENSG00000075240.16_3	GRAMD4	chr22:46971909-47075687	+	protein_coding	1.86194	2.08634	1.86731	3.62294	3.23349	3.60232
ENSG00000075275.16_3	CELSR1	chr22:46756731-46933067	-	protein_coding	4.40148	4.56112	3.88669	4.43423	4.41313	4.17275
ENSG00000075292.18_3	ZNF638	chr2:71503691-71662199	+	protein_coding	16.6887	14.607	14.1989	19.4758	14.7216	18.4878
ENSG00000075303.12_2	SLC25A40	chr7:87462883-87505672	-	protein_coding	10.2553	9.12681	10.1949	6.51614	5.05809	6.59554
ENSG00000075336.11_3	TIMM21	chr18:71815746-71827765	+	protein_coding	5.14069	5.05287	4.68687	3.99222	4.12235	3.77582
ENSG00000075391.16_3	RASAL2	chr1:178063276-178453282	+	protein_coding	2.16551	2.24248	5.67512	4.36067	4.0355	4.6591
ENSG00000075399.13_4	VPS9D1	chr16:89773542-89787394	-	protein_coding	1.37476	1.30853	1.47231	1.31283	1.19853	1.78724
ENSG00000075407.18_3	ZNF37A	chr10:38383262-38439221	+	protein_coding	5.72733	5.38791	5.3611	5.6971	3.68642	6.43517
ENSG00000075413.17_4	MARK3	chr14:103851729-103970168	+	protein_coding	7.48916	6.85122	6.93056	8.89074	8.37276	9.1932
ENSG00000075415.12_3	SLC25A3	chr12:98987369-99000157	+	protein_coding	32.7735	36.4031	34.5091	27.0464	29.7724	25.8802
ENSG00000075420.12_2	FNDC3B	chr3:171757418-172119455	+	protein_coding	8.2847	7.48769	8.07769	12.1968	9.14682	11.0548
ENSG00000075426.11_3	FOSL2	chr2:28615315-28640179	+	protein_coding	18.6585	19.5996	19.649	17.6052	17.1422	17.9611
ENSG00000075461.5_2	CACNG4	chr17:64961026-65029514	+	protein_coding	0.500412	0.340403	0.420073	0.700362	0.76145	0.637976
ENSG00000075539.14_4	FRYL	chr4:48499378-48782339	-	protein_coding	2.27385	1.9603	1.891	1.91595	2.08629	2.50866
ENSG00000075568.16_2	TMEM131	chr2:98372796-98612354	-	protein_coding	4.58507	4.26892	4.41137	5.45739	4.71104	5.27106
ENSG00000075618.17_2	FSCN1	chr7:5632454-5646286	+	protein_coding	78.473	84.8614	86.954	142.139	179.992	130.172
ENSG00000075624.13_3	ACTB	chr7:5566782-5603415	-	protein_coding	525.739	581.491	464.578	439.731	493.648	389.105
ENSG00000075643.5_3	MOCOS	chr18:33767482-33852120	+	protein_coding	7.05498	7.49359	7.3184	2.49032	2.22955	2.45656
ENSG00000075651.15_2	PLD1	chr3:171318195-171528740	-	protein_coding	1.54631	1.68014	1.58531	1.31341	1.11938	1.13413
ENSG00000075702.16_3	WDR62	chr19:36545783-36596008	+	protein_coding	2.07032	2.20588	2.00351	2.2985	2.16139	3.05397
ENSG00000075711.20_3	DLG1	chr3:196769431-197026171	-	protein_coding	7.58173	7.62159	7.23443	7.09264	6.24913	7.80517
ENSG00000075785.12_2	RAB7A	chr3:128444965-128533639	+	protein_coding	88.5829	75.3459	76.0366	104.446	111.308	102.112
ENSG00000075790.10_4	BCAP29	chr7:107220422-107269615	+	protein_coding	5.54974	4.06941	4.85036	4.02055	3.08065	4.42384
ENSG00000075826.16_3	SEC31B	chr10:102246399-102279621	-	protein_coding	0.743373	0.792698	0.916527	0.242542	0.17961	0.355892
ENSG00000075856.11_3	SART3	chr12:108916357-108955176	-	protein_coding	9.61269	9.79175	8.62204	7.87926	8.17485	8.08694
ENSG00000075914.12_3	EXOSC7	chr3:45016733-45077558	+	protein_coding	7.51311	5.68677	5.73758	3.44271	3.53983	3.90224
ENSG00000075945.12_2	KIFAP3	chr1:169890467-170054349	-	protein_coding	9.77704	8.60969	9.26559	9.90388	10.0004	8.93079
ENSG00000075975.15_2	MKRN2	chr3:12598513-12625212	+	protein_coding	26.5476	14.7707	13.6115	8.71247	17.5042	17.015
ENSG00000076003.4_2	MCM6	chr2:136597196-136633996	-	protein_coding	50.3718	44.7886	44.6666	26.2452	26.405	24.924
ENSG00000076043.9_3	REXO2	chr11:114310108-114321001	+	protein_coding	14.6718	15.9533	13.7023	14.3544	16.0818	14.2912
ENSG00000076053.10_3	RBM7	chr11:114270752-114284925	+	protein_coding	4.2275	4.33996	3.93101	4.66682	3.70423	3.60572
ENSG00000076067.12_2	RBMS2	chr12:56915713-56989980	+	protein_coding	12.7559	17.4068	17.2668	2.51454	5.90392	2.84166
ENSG00000076108.11_2	BAZ2A	chr12:56989380-57030600	-	protein_coding	13.785	11.8363	14.8189	19.0265	18.3685	18.0907
ENSG00000076201.14_2	PTPN23	chr3:47422501-47454931	+	protein_coding	6.55489	6.71396	7.67278	5.50086	5.99983	5.91873
ENSG00000076242.14_2	MLH1	chr3:37034823-37092409	+	protein_coding	6.75075	7.54852	6.71231	4.02484	3.41372	3.33073
ENSG00000076248.10_2	UNG	chr12:109535379-109548797	+	protein_coding	22.1671	24.6861	32.2353	15.7507	14.4397	13.4269
ENSG00000076321.10_3	KLHL20	chr1:173684080-173755840	+	protein_coding	7.39207	6.47146	6.61296	5.60531	5.01339	5.90356
ENSG00000076344.15_3	RGS11	chr16:318300-325980	-	protein_coding	1.29929	1.40032	1.1726	0.616185	0.328763	1.04526
ENSG00000076351.12_3	SLC46A1	chr17:26721775-26734215	-	protein_coding	4.22338	4.10737	4.4484	4.53742	4.30426	4.15055
ENSG00000076356.6_2	PLXNA2	chr1:208195587-208417665	-	protein_coding	2.77265	3.22469	2.96061	3.30347	3.11378	4.15049
ENSG00000076382.16_3	SPAG5	chr17:26904583-26926297	-	protein_coding	15.7633	15.0513	14.5096	19.6753	19.4072	20.2732
ENSG00000076513.16_3	ANKRD13A	chr12:110436991-110477568	+	protein_coding	8.81167	10.5652	9.11964	8.46605	8.01308	8.77515
ENSG00000076554.15_4	TPD52	chr8:80946980-81143467	-	protein_coding	14.1617	14.996	15.0511	11.16	10.6488	11.0415
ENSG00000076555.15_3	ACACB	chr12:109554400-109706031	+	protein_coding	1.325	1.43852	1.29706	0.860114	0.557345	1.00539
ENSG00000076604.14_3	TRAF4	chr17:27071002-27077976	+	protein_coding	9.96088	11.4978	10.7448	12.7279	14.4981	14.1615
ENSG00000076641.4_2	PAG1	chr8:81880045-82024303	-	protein_coding	0.0784391	0.0985752	0.0592046	0.632184	0.632352	0.559013
ENSG00000076650.6_2	GPATCH1	chr19:33571786-33621448	+	protein_coding	7.20809	6.67454	6.3494	5.23519	5.89582	5.3117
ENSG00000076662.9_3	ICAM3	chr19:10444452-10450499	-	protein_coding	0.967903	1.1129	1.04379	1.88199	2.24121	1.82731
ENSG00000076685.18_3	NT5C2	chr10:104847774-104953063	-	protein_coding	32.8016	34.9138	32.6325	29.7977	29.5351	28.2007
ENSG00000076706.16_3	MCAM	chr11:119179239-119192231	-	protein_coding	18.1924	18.2437	15.0019	18.2288	20.2607	20.4554
ENSG00000076770.14_3	MBNL3	chrX:131503345-131623996	-	protein_coding	5.62221	5.59473	4.81465	2.45887	1.95396	2.34472
ENSG00000076826.9_2	CAMSAP3	chr19:7660788-7683190	+	protein_coding	1.66875	2.12872	2.04675	3.78864	4.3563	3.78588
ENSG00000076864.19_3	RAP1GAP	chr1:21922708-21995856	-	protein_coding	4.71958	4.39848	4.4846	7.2682	6.63327	6.92865
ENSG00000076924.11_2	XAB2	chr19:7684411-7694451	-	protein_coding	11.8228	10.6493	10.9912	12.4461	13.906	11.5579
ENSG00000076928.17_3	ARHGEF1	chr19:42387228-42434302	+	protein_coding	5.42413	6.0406	5.20628	5.46341	5.68358	5.39204
ENSG00000076944.15_3	STXBP2	chr19:7701767-7712759	+	protein_coding	9.31141	9.23728	8.75347	7.75104	7.59351	6.93029
ENSG00000076984.17_2	MAP2K7	chr19:7968728-7979363	+	protein_coding	3.44772	5.02228	4.27369	4.34187	4.89965	4.27571
ENSG00000077044.10_3	DGKD	chr2:234263153-234380750	+	protein_coding	4.15548	4.42593	3.8822	2.29713	2.04283	2.50467
ENSG00000077092.18_3	RARB	chr3:25215823-25639423	+	protein_coding	0.0601042	0.0162066	0.02981	1.99188	2.1914	1.84841
ENSG00000077097.15_3	TOP2B	chr3:25639396-25706398	-	protein_coding	49.0131	43.4012	43.1437	32.8802	29.3336	29.5616
ENSG00000077147.14_2	TM9SF3	chr10:98277866-98347209	-	protein_coding	38.4934	36.9716	39.5155	40.5456	38.0089	35.2145
ENSG00000077150.18_3	NFKB2	chr10:104153867-104162286	+	protein_coding	36.2927	39.9996	38.6591	32.1352	38.7511	30.0498
ENSG00000077152.9_2	UBE2T	chr1:202300785-202311108	-	protein_coding	66.1403	61.4787	60.5578	53.0086	51.146	50.6352
ENSG00000077157.21_3	PPP1R12B	chr1:202317827-202561834	+	protein_coding	1.59374	0.908913	2.43436	2.08131	0.386248	0.592825
ENSG00000077232.17_3	DNAJC10	chr2:183580768-183659191	+	protein_coding	4.56047	4.29988	4.53042	4.23987	3.53703	4.06883
ENSG00000077235.17_3	GTF3C1	chr16:27470876-27561234	-	protein_coding	4.60808	4.29259	4.83788	5.74673	6.06854	5.55248
ENSG00000077238.13_3	IL4R	chr16:27324989-27376099	+	protein_coding	3.46864	5.5534	9.38926	1.63825	4.784	5.10174
ENSG00000077254.14_4	USP33	chr1:78161672-78225537	-	protein_coding	14.5041	13.611	14.4741	14.39	13.1977	14.9319
ENSG00000077312.8_3	SNRPA	chr19:41256542-41271294	+	protein_coding	11.1604	13.8034	12.4586	16.2018	17.0106	14.8919
ENSG00000077348.8_2	EXOSC5	chr19:41892279-41903384	-	protein_coding	20.4552	14.6522	16.5159	7.36026	9.14762	7.68007
ENSG00000077380.15_3	DYNC1I2	chr2:172543919-172604930	+	protein_coding	17.18	13.4267	13.957	22.3925	20.8469	20.9262
ENSG00000077454.15_3	LRCH4	chr7:100171634-100183776	-	protein_coding	1.00736	1.30636	1.07938	1.3121	2.03493	1.39184
ENSG00000077458.12_2	FAM76B	chr11:95502106-95523573	-	protein_coding	14.138	12.3215	14.4152	11.4178	9.89268	11.7341
ENSG00000077463.14_3	SIRT6	chr19:4174106-4182601	-	protein_coding	4.3483	4.50193	4.34056	4.52974	4.66295	4.18683
ENSG00000077514.8_3	POLD3	chr11:74204896-74380162	+	protein_coding	25.2039	24.2021	23.0889	12.2126	10.8793	12.2902
ENSG00000077549.17_3	CAPZB	chr1:19665270-19812033	-	protein_coding	50.6461	52.9263	46.3735	55.0174	71.2985	51.5906
ENSG00000077585.13_3	GPR137B	chr1:236305805-236385165	+	protein_coding	6.4598	5.93154	6.02485	8.62621	9.02037	9.11718
ENSG00000077684.15_3	JADE1	chr4:129730778-129796379	+	protein_coding	10.0419	9.36097	8.41937	3.21323	7.44147	7.44426
ENSG00000077713.18_3	SLC25A43	chrX:118533023-118588441	+	protein_coding	3.13958	3.59374	2.614	3.06728	1.74452	2.00044
ENSG00000077721.15_2	UBE2A	chrX:118708430-118725046	+	protein_coding	6.01761	6.25185	6.34735	5.17493	7.36044	5.41834
ENSG00000077782.19_3	FGFR1	chr8:38268656-38326352	-	protein_coding	3.53376	3.5935	3.53933	6.6241	7.17425	6.38175
ENSG00000077935.16_2	SMC1B	chr22:45739944-45809500	-	protein_coding	4.16066	2.28193	2.59342	0.370397	0.476218	0.502567
ENSG00000077942.18_3	FBLN1	chr22:45898118-45997015	+	protein_coding	15.1314	17.4817	13.4734	31.6435	29.9151	27.4373
ENSG00000078043.15_3	PIAS2	chr18:44383187-44500123	-	protein_coding	1.24997	1.08523	1.19603	0.885691	0.785232	0.846343
ENSG00000078061.12_2	ARAF	chrX:47420499-47431319	+	protein_coding	19.1399	20.6827	20.8547	18.6588	17.607	18.8974
ENSG00000078070.12_3	MCCC1	chr3:182733006-182833863	-	protein_coding	4.8585	6.09968	5.01098	2.72891	2.34048	2.85973
ENSG00000078081.7_3	LAMP3	chr3:182840001-182881627	-	protein_coding	0.422894	0.550877	0.184806	1.32571	1.51593	1.35445
ENSG00000078114.18_3	NEBL	chr10:21068902-21463116	-	protein_coding	0.951004	0.460002	0.854491	0.538471	0.312807	0.70283
ENSG00000078124.11_3	ACER3	chr11:76571911-76737841	+	protein_coding	6.56185	6.98312	7.42102	6.90568	7.24432	7.42852
ENSG00000078140.13_3	UBE2K	chr4:39699664-39784412	+	protein_coding	27.3055	23.1614	24.3823	25.8216	26.4284	26.2573
ENSG00000078142.12_3	PIK3C3	chr18:39535171-39667794	+	protein_coding	2.49554	2.26874	2.8294	1.99069	1.94821	2.04632
ENSG00000078177.13_3	N4BP2	chr4:40058446-40159872	+	protein_coding	2.77321	1.65321	1.69526	1.78273	1.40338	2.34219
ENSG00000078237.6_2	TIGAR	chr12:4416929-4463759	+	protein_coding	2.15716	2.17634	2.0139	4.42543	4.83881	4.36928
ENSG00000078246.16_3	TULP3	chr12:2986389-3050306	+	protein_coding	14.2249	14.9243	13.8277	11.9191	10.7154	12.0243
ENSG00000078269.14_3	SYNJ2	chr6:158402919-158520208	+	protein_coding	5.44926	5.3552	4.6965	4.36959	5.6887	6.96318
ENSG00000078304.19_3	PPP2R5C	chr14:102228135-102394326	+	protein_coding	5.44396	5.92768	5.5698	5.45903	4.86069	6.06937
ENSG00000078369.17_2	GNB1	chr1:1716724-1822556	-	protein_coding	41.483	44.7352	43.5361	33.3198	36.9132	33.9251
ENSG00000078399.17_3	HOXA9	chr7:27202054-27214799	-	protein_coding	3.27934	2.62945	2.61702	1.13249	1.41874	2.19872
ENSG00000078401.6_2	EDN1	chr6:12290596-12297427	+	protein_coding	3.60237	4.42678	2.89705	7.7492	9.51225	8.60667
ENSG00000078403.16_3	MLLT10	chr10:21813604-22032559	+	protein_coding	8.17803	8.42125	7.89335	6.80997	6.5783	7.40714
ENSG00000078487.17_3	ZCWPW1	chr7:99998449-100026615	-	protein_coding	0.782	0.634565	0.595279	0.154855	0.239883	0.342582
ENSG00000078618.21_3	NRDC	chr1:52254863-52344609	-	protein_coding	23.4858	23.9712	24.1643	27.5771	24.1318	27.1283
ENSG00000078668.13_3	VDAC3	chr8:42249142-42263415	+	protein_coding	20.7977	19.891	21.391	28.7075	30.2062	25.2237
ENSG00000078674.17_2	PCM1	chr8:17780349-17887453	+	protein_coding	15.0998	14.2432	13.8222	5.56428	3.97424	5.93042
ENSG00000078699.21_2	CBFA2T2	chr20:32077881-32237842	+	protein_coding	1.8862	2.01559	2.35383	1.30827	1.9431	1.90533
ENSG00000078747.14_3	ITCH	chr20:32951041-33099198	+	protein_coding	28.1811	13.8168	16.171	13.9157	20.2119	16.1312
ENSG00000078804.12_3	TP53INP2	chr20:33292094-33301243	+	protein_coding	2.4456	2.40897	2.72853	2.82044	2.406	3.46958
ENSG00000078808.16_2	SDF4	chr1:1152288-1167411	-	protein_coding	14.505	19.0435	15.0361	18.9603	17.2999	14.7341
ENSG00000078900.14_3	TP73	chr1:3569084-3652765	+	protein_coding	1.7132	1.92223	2.00811	1.48429	1.37403	0.817679
ENSG00000078902.15_2	TOLLIP	chr11:1295601-1330884	-	protein_coding	1.89043	1.82964	1.82356	2.80926	2.68743	2.77015
ENSG00000078967.12_3	UBE2D4	chr7:43966037-43995735	+	protein_coding	3.37127	3.16293	3.30315	4.77784	5.23215	4.52336
ENSG00000079112.9_3	CDH17	chr8:95139399-95229531	-	protein_coding	0.0142286	0.0593616	0.0552312	1.2608	0.664922	0.923335
ENSG00000079134.11_3	THOC1	chr18:214520-268050	-	protein_coding	9.28861	8.96487	8.31192	5.76993	5.2711	5.99403
ENSG00000079150.17_2	FKBP7	chr2:179328391-179343327	-	protein_coding	1.31174	1.62015	1.24568	1.69757	1.05351	1.20664
ENSG00000079156.16_2	OSBPL6	chr2:179059208-179267618	+	protein_coding	1.48866	0.910225	1.07711	1.58526	1.40801	1.66187
ENSG00000079215.13_3	SLC1A3	chr5:36606457-36688436	+	protein_coding	3.52157	7.78561	3.41266	17.5714	42.2389	14.9642
ENSG00000079246.15_3	XRCC5	chr2:216972187-217071026	+	protein_coding	59.8422	55.7203	54.4664	63.0327	65.8477	59.5236
ENSG00000079257.7_2	LXN	chr3:158363611-158390482	-	protein_coding	21.2375	23.113	18.3489	19.7444	19.8697	16.6147
ENSG00000079277.19_4	MKNK1	chr1:47023080-47082515	-	protein_coding	2.41285	2.26787	2.57875	2.15894	2.07235	2.60548
ENSG00000079308.16_3	TNS1	chr2:218664512-218867718	-	protein_coding	0.220775	0.189573	0.246675	0.785619	0.609538	0.775577
ENSG00000079313.13_3	REXO1	chr19:1815245-1848462	-	protein_coding	5.09444	5.52606	5.54442	5.98334	6.1345	6.63724
ENSG00000079332.14_3	SAR1A	chr10:71907045-71930279	-	protein_coding	10.3965	9.64469	9.59064	18.3507	20.4477	34.5517
ENSG00000079335.18_3	CDC14A	chr1:100810581-100985833	+	protein_coding	4.69122	4.31226	3.80135	4.06407	3.93824	3.65726
ENSG00000079337.15_3	RAPGEF3	chr12:48128150-48164823	-	protein_coding	1.08344	0.850965	0.849152	2.27921	2.12536	2.86487
ENSG00000079385.21_3	CEACAM1	chr19:43011456-43065386	-	protein_coding	0.324256	0.352355	0.418738	2.25516	2.08286	1.92998
ENSG00000079387.13_3	SENP1	chr12:48436681-48500091	-	protein_coding	15.2764	14.4951	14.6929	12.8908	10.8946	11.8515
ENSG00000079432.7_3	CIC	chr19:42772689-42799949	+	protein_coding	4.88355	5.22587	4.84522	10.1883	10.0882	10.2871
ENSG00000079435.9_3	LIPE	chr19:42905659-42931578	-	protein_coding	0.874267	1.09647	0.784611	2.27291	2.50125	2.09611
ENSG00000079459.12_3	FDFT1	chr8:11653082-11696818	+	protein_coding	15.0897	18.4865	14.7223	31.2083	34.2192	30.3541
ENSG00000079462.7_3	PAFAH1B3	chr19:42801185-42807698	-	protein_coding	10.8292	13.0035	10.8139	15.9784	15.2929	14.363
ENSG00000079482.12_3	OPHN1	chrX:67262186-67653755	-	protein_coding	2.74911	2.87571	2.61403	3.50088	2.99332	3.88736
ENSG00000079616.12_2	KIF22	chr16:29802040-29816706	+	protein_coding	17.658	18.0951	18.0214	15.504	16.9345	15.5693
ENSG00000079691.17_3	CARMIL1	chr6:25279306-25620758	+	protein_coding	8.37393	8.59591	7.82197	15.3997	14.4462	14.7382
ENSG00000079739.15_2	PGM1	chr1:64058947-64125916	+	protein_coding	19.7379	20.2336	18.096	20.1561	21.7834	19.1198
ENSG00000079785.14_3	DDX1	chr2:15731302-15771235	+	protein_coding	42.3914	41.8528	40.7381	35.6822	33.0744	35.0894
ENSG00000079805.16_4	DNM2	chr19:10828755-10944164	+	protein_coding	4.55351	4.87657	4.42515	6.0513	6.13327	5.67445
ENSG00000079819.18_3	EPB41L2	chr6:131160487-131384462	-	protein_coding	13.2807	12.9575	13.209	10.3965	10.4896	12.446
ENSG00000079950.13_2	STX7	chr6:132767006-132834337	-	protein_coding	2.39097	2.07374	2.35086	2.53258	2.26017	2.44864
ENSG00000079974.17_3	RABL2B	chr22:51205929-51222091	-	protein_coding	1.02533	1.6628	1.5713	0.643307	0.660308	1.40843
ENSG00000079999.13_3	KEAP1	chr19:10596796-10614417	-	protein_coding	6.79122	6.30312	7.49469	4.62275	6.66591	5.15329
ENSG00000080031.9_3	PTPRH	chr19:55692616-55720874	-	protein_coding	1.8992	1.39314	1.84847	2.03419	1.98327	2.33479
ENSG00000080189.14_2	SLC35C2	chr20:44974619-44993097	-	protein_coding	5.94496	6.02925	6.34111	3.05512	3.07974	4.0329
ENSG00000080200.9_2	CRYBG3	chr3:97540884-97663807	+	protein_coding	3.71792	3.1079	3.14788	3.09015	2.12774	3.16072
ENSG00000080298.15_3	RFX3	chr9:3218297-3526004	-	protein_coding	2.12682	1.91932	1.9436	1.4069	1.05097	1.36318
ENSG00000080345.17_3	RIF1	chr2:152266397-152364527	+	protein_coding	12.0005	10.741	11.1489	8.25503	5.54695	8.5025
ENSG00000080371.5_2	RAB21	chr12:72148654-72194065	+	protein_coding	5.10947	4.60107	4.77569	4.97874	4.99483	4.35004
ENSG00000080503.22_3	SMARCA2	chr9:1980290-2193624	+	protein_coding	4.70533	4.05701	3.8376	2.75726	2.96961	3.09089
ENSG00000080546.13_2	SESN1	chr6:109307640-109416022	-	protein_coding	1.54345	1.42125	1.34538	1.83545	1.76744	1.79173
ENSG00000080561.13_3	MID2	chrX:107068985-107170423	+	protein_coding	2.25325	2.08412	2.08222	4.96751	6.56891	5.20218
ENSG00000080573.6_2	COL5A3	chr19:10070237-10121147	-	protein_coding	0.457888	0.208609	0.221139	14.3315	11.9556	14.7821
ENSG00000080603.16_3	SRCAP	chr16:30709530-30752730	+	protein_coding	7.60715	3.75617	3.44304	6.23173	9.03458	9.90837
ENSG00000080608.9_2	PUM3	chr9:2720469-2844241	-	protein_coding	29.6745	27.156	23.947	19.133	16.9566	19.5889
ENSG00000080802.18_2	CNOT4	chr7:135046547-135194875	-	protein_coding	4.95234	5.71778	4.97046	4.97591	5.97816	5.89911
ENSG00000080815.18_3	PSEN1	chr14:73603126-73690399	+	protein_coding	5.37124	5.55646	5.48379	7.77373	8.03194	7.81695
ENSG00000080819.6_3	CPOX	chr3:98239976-98312567	-	protein_coding	6.32323	5.64628	5.54425	9.51509	9.72614	7.57022
ENSG00000080822.16_3	CLDND1	chr3:98216756-98241910	-	protein_coding	6.53618	12.4368	14.4953	10.6356	11.3405	3.76048
ENSG00000080824.18_2	HSP90AA1	chr14:102547075-102606036	-	protein_coding	172.841	146.244	161.359	307.754	335.34	294.594
ENSG00000080839.11_3	RBL1	chr20:35624752-35724398	-	protein_coding	14.8092	13.7342	14.2601	7.11462	6.34789	6.59444
ENSG00000080845.17_2	DLGAP4	chr20:34894258-35157040	+	protein_coding	12.5242	11.9375	12.6981	12.2733	11.0691	11.679
ENSG00000080986.12_2	NDC80	chr18:2571510-2616634	+	protein_coding	52.9027	44.4385	46.3514	37.3977	33.2578	37.9298
ENSG00000081014.10_3	AP4E1	chr15:51200869-51298097	+	protein_coding	3.46119	3.40413	4.09055	5.17139	4.79187	6.13312
ENSG00000081019.13_2	RSBN1	chr1:114304454-114355098	-	protein_coding	5.4449	4.12398	4.05473	8.40735	8.68928	8.21787
ENSG00000081026.18_3	MAGI3	chr1:113933371-114228545	+	protein_coding	1.74883	1.81176	1.78791	3.10036	2.67168	2.82837
ENSG00000081041.8_2	CXCL2	chr4:74962752-74965010	-	protein_coding	2.85074	2.73271	3.99958	1.12344	1.00652	1.72893
ENSG00000081052.11_2	COL4A4	chr2:227867427-228028829	-	protein_coding	2.80637	2.8629	2.54265	2.94066	2.48321	3.94784
ENSG00000081087.14_3	OSTM1	chr6:108362613-108487058	-	protein_coding	3.37985	3.63817	3.72921	6.26331	5.01071	5.68421
ENSG00000081154.11_2	PCNP	chr3:101292939-101313281	+	protein_coding	24.76	27.8575	25.9457	23.5144	24.6682	22.8818
ENSG00000081177.18_2	EXD2	chr14:69658228-69710737	+	protein_coding	1.65052	2.02426	1.62788	1.85981	1.89138	1.72849
ENSG00000081181.7_2	ARG2	chr14:68086515-68118437	+	protein_coding	1.74433	0.897084	0.783413	15.2266	13.0997	14.0991
ENSG00000081307.12_3	UBA5	chr3:132373290-132396941	+	protein_coding	9.21927	8.52927	8.42277	6.23224	5.47857	6.2238
ENSG00000081320.10_3	STK17B	chr2:196998290-197041227	-	protein_coding	5.09666	4.29793	5.22928	8.93447	8.44704	8.57569
ENSG00000081377.16_2	CDC14B	chr9:99252523-99382112	-	protein_coding	2.73856	2.89899	2.69172	3.19156	3.09625	3.40311
ENSG00000081386.12_2	ZNF510	chr9:99518147-99540411	-	protein_coding	3.97665	3.59031	4.01835	4.95365	4.04073	5.91036
ENSG00000081692.12_2	JMJD4	chr1:227918126-227923112	-	protein_coding	0.669979	0.993468	0.933686	0.582794	1.16265	1.19533
ENSG00000081721.11_2	DUSP12	chr1:161719548-161727028	+	protein_coding	29.8676	24.2735	24.6519	23.1925	32.136	26.5416
ENSG00000081760.16_3	AACS	chr12:125549925-125627879	+	protein_coding	2.05753	2.18057	1.75054	0.854729	0.905765	1.00486
ENSG00000081791.8_3	KIAA0141	chr5:141303373-141321612	+	protein_coding	6.41466	6.17732	5.85391	2.95836	3.15281	3.71271
ENSG00000081803.15_4	CADPS2	chr7:121958479-122526813	-	protein_coding	1.81606	2.51364	1.82042	1.30956	1.48902	1.16532
ENSG00000081870.11_2	HSPB11	chr1:54382247-54411602	-	protein_coding	20.7864	20.7173	20.9162	16.4524	14.9526	15.8315
ENSG00000081913.13_3	PHLPP1	chr18:60382683-60647666	+	protein_coding	1.81684	1.84398	1.97296	2.11592	2.32456	1.94566
ENSG00000081923.11_3	ATP8B1	chr18:55313658-55470333	-	protein_coding	2.29172	2.57829	2.35224	3.196	3.17095	2.88631
ENSG00000082014.16_2	SMARCD3	chr7:150935850-150974982	-	protein_coding	0.737288	0.808563	0.932751	0.946249	0.923505	1.27804
ENSG00000082068.8_2	WDR70	chr5:37379314-37753537	+	protein_coding	19.4375	17.4854	17.2407	12.4968	12.4008	12.5881
ENSG00000082074.15_4	FYB1	chr5:39105338-39274630	-	protein_coding	0.222648	0.0901521	0.183653	2.24872	1.6478	2.22708
ENSG00000082146.12_2	STRADB	chr2:202252581-202345569	+	protein_coding	5.12283	3.97655	4.87665	2.39426	2.40905	2.2648
ENSG00000082153.17_3	BZW1	chr2:201675317-201692061	+	protein_coding	20.2545	20.6191	21.5766	29.2992	29.0722	26.0367
ENSG00000082196.20_3	C1QTNF3	chr5:34019553-34043937	-	protein_coding	1.50974	0.948696	1.2309	0.473084	0.619893	1.03484
ENSG00000082212.12_2	ME2	chr18:48405104-48480627	+	protein_coding	1.68422	2.19125	1.97183	1.66941	1.14366	1.23848
ENSG00000082213.17_4	C5orf22	chr5:31532373-31555165	+	protein_coding	31.8344	31.1857	31.6057	23.6781	22.1236	24.7308
ENSG00000082258.12_2	CCNT2	chr2:135675805-135716912	+	protein_coding	1.14264	0.932686	1.99888	0.687677	1.82001	2.28335
ENSG00000082269.16_3	FAM135A	chr6:71122644-71270877	+	protein_coding	2.81231	2.62149	3.2627	4.4137	4.19118	4.14252
ENSG00000082438.15_3	COBLL1	chr2:165510134-165700189	-	protein_coding	0.515392	0.480853	0.367268	0.652481	0.770505	0.922642
ENSG00000082458.11_2	DLG3	chrX:69664711-69725340	+	protein_coding	9.92971	8.60614	3.78606	8.93191	8.76219	8.96834
ENSG00000082497.11_2	SERTAD4	chr1:210406144-210419976	+	protein_coding	6.89373	8.79584	7.87292	3.98957	3.48035	3.09603
ENSG00000082512.14_2	TRAF5	chr1:211499957-211548288	+	protein_coding	6.63325	5.65686	5.73212	4.12367	3.4437	4.67699
ENSG00000082515.17_3	MRPL22	chr5:154320630-154348971	+	protein_coding	10.606	10.5221	11.2011	12.1692	11.9549	11.4232
ENSG00000082516.8_2	GEMIN5	chr5:154266976-154317769	-	protein_coding	9.77859	8.25065	8.51985	5.36038	5.63575	5.35316
ENSG00000082641.15_3	NFE2L1	chr17:46125691-46138849	+	protein_coding	22.6205	24.2527	18.7342	13.9019	20.942	15.092
ENSG00000082701.14_4	GSK3B	chr3:119540170-119813264	-	protein_coding	16.5811	17.5975	17.8874	22.7145	22.6558	23.228
ENSG00000082781.11_3	ITGB5	chr3:124480795-124620265	-	protein_coding	19.4645	21.0326	18.8202	25.3781	27.6916	23.6817
ENSG00000082805.19_3	ERC1	chr12:1099675-1605099	+	protein_coding	4.02145	2.04498	1.91371	4.24421	4.53111	2.23155
ENSG00000082898.16_2	XPO1	chr2:61704984-61765761	-	protein_coding	31.6835	34.1818	31.3121	55.9146	50.6796	47.767
ENSG00000082996.19_4	RNF13	chr3:149530495-149679926	+	protein_coding	4.15466	4.86031	4.3327	5.41239	5.3846	5.74776
ENSG00000083093.9_2	PALB2	chr16:23614481-23652631	-	protein_coding	9.03997	7.91697	8.17198	5.83534	4.78177	5.81832
ENSG00000083097.14_2	DOPEY1	chr6:83777385-83881069	+	protein_coding	0.687357	0.599166	0.627102	1.22654	0.76	1.43702
ENSG00000083099.10_2	LYRM2	chr6:90277863-90348472	-	protein_coding	2.69373	2.73206	2.90882	1.92385	2.02903	1.94458
ENSG00000083123.14_2	BCKDHB	chr6:80816364-81055987	+	protein_coding	4.20577	4.09561	3.63798	2.99613	2.57049	3.37891
ENSG00000083168.9_3	KAT6A	chr8:41786997-41909508	-	protein_coding	3.93261	3.54114	3.78708	3.84756	3.46775	4.06335
ENSG00000083223.17_2	ZCCHC6	chr9:88902648-88969369	-	protein_coding	7.7852	7.57022	7.33239	9.8421	10.4506	11.674
ENSG00000083290.19_2	ULK2	chr17:19674142-19771249	-	protein_coding	4.24366	4.2921	4.00948	1.85601	1.84517	1.98412
ENSG00000083312.17_2	TNPO1	chr5:72112139-72212560	+	protein_coding	50.5605	57.0453	55.5022	68.4041	70.7822	65.0589
ENSG00000083444.16_2	PLOD1	chr1:11994262-12035595	+	protein_coding	14.1027	12.2362	13.1861	20.4071	17.7485	17.4354
ENSG00000083454.21_3	P2RX5	chr17:3575493-3599698	-	protein_coding	2.69267	2.34435	3.58595	3.18521	2.93427	2.77164
ENSG00000083457.11_2	ITGAE	chr17:3617922-3704537	-	protein_coding	2.98168	2.92103	3.42598	3.50386	3.90762	3.21959
ENSG00000083520.14_2	DIS3	chr13:73326307-73356234	-	protein_coding	11.5657	10.9079	10.2868	11.8928	10.5943	12.4557
ENSG00000083535.15_3	PIBF1	chr13:73356197-73590599	+	protein_coding	12.81	9.80558	11.1201	15.6814	11.6444	15.1437
ENSG00000083544.13_3	TDRD3	chr13:60970591-61148012	+	protein_coding	5.08796	4.47623	4.59697	3.06426	2.71709	2.84919
ENSG00000083635.7_3	NUFIP1	chr13:45513384-45563618	-	protein_coding	4.84367	4.14425	4.22956	4.81861	4.74411	3.98882
ENSG00000083642.18_2	PDS5B	chr13:33160564-33352157	+	protein_coding	6.05247	5.13001	4.97146	8.14938	7.69057	7.69932
ENSG00000083720.12_2	OXCT1	chr5:41730167-41870621	-	protein_coding	71.4832	80.1992	76.036	59.5606	51.3341	55.058
ENSG00000083750.12_3	RRAGB	chrX:55744172-55785207	+	protein_coding	8.87733	9.89003	10.024	8.90285	9.29678	8.12202
ENSG00000083799.17_3	CYLD	chr16:50775961-50835846	+	protein_coding	7.32012	6.89368	7.36034	11.0097	11.203	10.1546
ENSG00000083812.11_3	ZNF324	chr19:58978412-58986803	+	protein_coding	0.614995	0.892272	0.977582	1.16925	1.05714	0.669872
ENSG00000083817.8_2	ZNF416	chr19:58082934-58090295	-	protein_coding	1.8778	1.47185	2.16457	2.86624	3.24021	2.84189
ENSG00000083828.15_3	ZNF586	chr19:58281023-58331307	+	protein_coding	2.10986	1.79671	1.73406	1.44309	1.7036	2.34336
ENSG00000083838.15_3	ZNF446	chr19:58985384-58992597	+	protein_coding	0.869079	0.963583	1.04688	0.719562	0.804401	0.792037
ENSG00000083844.10_4	ZNF264	chr19:57702868-57734214	+	protein_coding	0.262296	1.98072	2.32543	2.3858	0.14087	0.366172
ENSG00000083845.8_2	RPS5	chr19:58897767-58906173	+	protein_coding	62.1005	84.975	63.1354	57.6009	87.8835	69.8959
ENSG00000083857.13_3	FAT1	chr4:187508937-187647876	-	protein_coding	3.34985	3.08836	2.89153	8.28207	6.73901	6.09268
ENSG00000083896.12_3	YTHDC1	chr4:69176105-69215807	-	protein_coding	14.6871	14.8286	16.8031	15.525	11.5464	15.7052
ENSG00000083937.8_2	CHMP2B	chr3:87276421-87304698	+	protein_coding	20.0511	21.9416	19.7737	22.6304	23.4511	22.3002
ENSG00000084070.11_3	SMAP2	chr1:40810522-40888998	+	protein_coding	3.57824	3.51336	4.6166	5.91121	5.40158	5.50565
ENSG00000084072.16_3	PPIE	chr1:40157854-40229586	+	protein_coding	6.04958	5.93091	6.01668	5.97539	6.19145	5.92535
ENSG00000084073.8_2	ZMPSTE24	chr1:40723779-40759856	+	protein_coding	33.5269	30.7942	32.8393	46.8393	47.0516	43.8952
ENSG00000084090.13_3	STARD7	chr2:96850597-96874563	-	protein_coding	42.645	46.9466	45.5662	53.1072	56.3936	49.2413
ENSG00000084092.6_2	NOA1	chr4:57829536-57844989	-	protein_coding	9.37764	10.2066	9.96515	7.9121	8.70079	7.16979
ENSG00000084093.16_2	REST	chr4:57774042-57832844	+	protein_coding	11.7348	5.71921	10.3157	13.6056	12.0687	14.0196
ENSG00000084112.14_3	SSH1	chr12:109171968-109251366	-	protein_coding	5.09038	5.57406	5.03671	5.45612	4.80008	5.53706
ENSG00000084207.15_2	GSTP1	chr11:67351066-67354131	+	protein_coding	128.417	161.036	121.195	137.296	154.589	130.661
ENSG00000084234.16_3	APLP2	chr11:129939732-130014706	+	protein_coding	58.9937	58.9141	51.5708	62.752	59.1683	56.4135
ENSG00000084444.13_2	FAM234B	chr12:13197218-13295455	+	protein_coding	0.676098	0.728086	0.684612	1.51139	1.48222	1.66552
ENSG00000084463.7_2	WBP11	chr12:14937513-14956474	-	protein_coding	22.8318	21.4611	21.6721	22.3701	23.9563	20.0332
ENSG00000084623.11_2	EIF3I	chr1:32687529-32697205	+	protein_coding	84.8581	96.6334	100.305	119.624	125.155	109.036
ENSG00000084628.9_2	NKAIN1	chr1:31652592-31712401	-	protein_coding	0.714438	0.332743	0.620959	0.871078	0.598983	0.768438
ENSG00000084636.17_3	COL16A1	chr1:32117848-32169920	-	protein_coding	3.38619	2.68245	2.74543	2.41919	2.06041	3.15925
ENSG00000084652.15_2	TXLNA	chr1:32645287-32663886	+	protein_coding	27.2424	28.865	28.8215	22.2313	22.5232	26.0119
ENSG00000084676.15_2	NCOA1	chr2:24714783-24993571	+	protein_coding	1.00334	0.735873	0.891359	1.14845	0.690368	1.02192
ENSG00000084693.15_3	AGBL5	chr2:27265232-27293490	+	protein_coding	7.17741	6.92296	6.16261	6.5352	6.00376	5.51318
ENSG00000084710.13_2	EFR3B	chr2:25264999-25382006	+	protein_coding	0.274547	0.115423	0.291485	1.04187	0.695042	0.573645
ENSG00000084731.14_3	KIF3C	chr2:26149465-26205618	-	protein_coding	2.26193	2.39962	2.28789	7.05461	6.47317	5.90052
ENSG00000084733.10_2	RAB10	chr2:26256976-26360323	+	protein_coding	42.4038	41.2802	42.405	49.6777	51.9894	45.2156
ENSG00000084754.10_3	HADHA	chr2:26413504-26467594	-	protein_coding	51.7604	59.9073	54.2558	62.6897	67.3987	56.9063
ENSG00000084764.10_3	MAPRE3	chr2:27193480-27250064	+	protein_coding	6.2552	5.76813	6.50482	8.07883	7.17216	7.06989
ENSG00000084774.13_2	CAD	chr2:27440258-27466811	+	protein_coding	10.7184	10.7693	10.7408	4.47078	4.26824	3.87189
ENSG00000085063.14_3	CD59	chr11:33719807-33757991	-	protein_coding	22.8269	8.88488	26.7438	24.2821	42.4373	43.6806
ENSG00000085117.11_3	CD82	chr11:44585977-44641913	+	protein_coding	2.28575	2.15128	1.99202	6.30504	4.5445	3.92121
ENSG00000085185.15_3	BCORL1	chrX:129115083-129192058	+	protein_coding	1.62453	1.13634	1.415	3.65228	4.14659	4.37624
ENSG00000085224.21_4	ATRX	chrX:76760356-77041755	-	protein_coding	12.2435	14.3103	10.954	11.6539	7.40103	11.1754
ENSG00000085231.13_3	AK6	chr5:68646811-68665840	-	protein_coding	15.6894	16.5573	19.3901	24.8657	23.3451	27.7031
ENSG00000085274.15_2	MYNN	chr3:169490619-169507504	+	protein_coding	8.51555	7.07552	6.96055	10.4903	10.4955	9.83768
ENSG00000085276.17_4	MECOM	chr3:168801287-169381406	-	protein_coding	6.78697	5.1706	6.12026	8.95261	7.54812	9.4645
ENSG00000085365.17_2	SCAMP1	chr5:77656407-77774894	+	protein_coding	9.62189	6.22062	9.5182	6.9355	4.67286	13.852
ENSG00000085377.13_3	PREP	chr6:105725440-105850959	-	protein_coding	10.0832	10.0379	9.34353	10.5514	9.71005	9.14491
ENSG00000085382.11_3	HACE1	chr6:105175968-105307794	-	protein_coding	1.28565	1.33007	1.30886	1.38323	1.12489	1.42462
ENSG00000085415.15_2	SEH1L	chr18:12947132-12987535	+	protein_coding	6.25107	7.62544	7.62122	5.74641	6.50992	5.74691
ENSG00000085433.15_3	WDR47	chr1:109512836-109584735	-	protein_coding	7.36505	5.79201	6.68406	10.9338	10.1051	11.555
ENSG00000085449.14_3	WDFY1	chr2:224720433-224810104	-	protein_coding	11.2526	10.409	10.299	5.58635	5.2805	6.50041
ENSG00000085465.12_2	OVGP1	chr1:111956936-111970399	-	protein_coding	3.40721	3.28344	3.0294	2.7816	3.11622	4.33035
ENSG00000085491.15_2	SLC25A24	chr1:108676658-108743471	-	protein_coding	23.1736	19.5021	15.4626	18.6907	18.5476	18.9791
ENSG00000085511.19_3	MAP3K4	chr6:161412759-161538417	+	protein_coding	4.89818	4.36918	3.82735	3.10255	2.80409	3.02548
ENSG00000085514.15_4	PILRA	chr7:99965153-99997722	+	protein_coding	0.696138	0.484589	0.866654	1.04169	0.976601	1.3751
ENSG00000085644.13_2	ZNF213	chr16:3179778-3192806	+	protein_coding	1.3383	1.12513	0.745971	0.648234	0.496207	0.786755
ENSG00000085662.13_2	AKR1B1	chr7:134127102-134144036	-	protein_coding	52.0866	60.8005	56.4449	754.161	855.135	752.067
ENSG00000085719.12_3	CPNE3	chr8:87526656-87573726	+	protein_coding	14.4993	13.5647	15.6476	10.9574	10.2882	9.85035
ENSG00000085721.12_2	RRN3	chr16:15153879-15188174	-	protein_coding	22.7012	21.3855	21.1646	23.9701	24.6673	21.7511
ENSG00000085733.15_2	CTTN	chr11:70244510-70282690	+	protein_coding	28.8574	26.8843	26.9124	22.75	19.9274	24.628
ENSG00000085741.12_2	WNT11	chr11:75897369-75921780	-	protein_coding	0.154168	0	0.175609	1.1998	1.6303	1.19666
ENSG00000085760.14_2	MTIF2	chr2:55463731-55496483	-	protein_coding	37.0776	30.9288	30.9902	18.4658	15.4254	19.7673
ENSG00000085788.13_3	DDHD2	chr8:38082736-38133076	+	protein_coding	3.07766	3.85118	4.24784	3.62999	4.83946	3.83316
ENSG00000085832.16_4	EPS15	chr1:51819935-51985000	-	protein_coding	15.3649	14.9938	14.7191	18.3399	17.011	17.5966
ENSG00000085840.12_2	ORC1	chr1:52838501-52870131	-	protein_coding	18.367	17.6628	17.995	14.6413	14.9736	13.4922
ENSG00000085871.8_2	MGST2	chr4:140586922-140661899	+	protein_coding	5.09771	5.53522	6.05905	4.85172	6.13932	3.35515
ENSG00000085872.14_3	CHERP	chr19:16628700-16653341	-	protein_coding	10.7161	11.013	9.80346	10.3541	11.5005	10.1933
ENSG00000085978.21_2	ATG16L1	chr2:234118697-234204320	+	protein_coding	3.36332	2.62233	2.09422	3.3484	6.25233	5.56777
ENSG00000085982.13_2	USP40	chr2:234384166-234475428	-	protein_coding	2.14498	2.14451	2.06476	1.28258	0.896927	1.30546
ENSG00000085998.13_2	POMGNT1	chr1:46654354-46685977	-	protein_coding	8.68501	8.29353	8.54772	7.43545	8.18392	6.57694
ENSG00000085999.11_3	RAD54L	chr1:46713360-46744145	+	protein_coding	10.8494	9.67354	7.87982	5.35649	6.07653	5.07704
ENSG00000086015.20_2	MAST2	chr1:46252659-46501796	+	protein_coding	6.07252	5.85207	5.89329	7.23309	7.06753	7.20238
ENSG00000086061.15_2	DNAJA1	chr9:33025209-33039905	+	protein_coding	99.6288	80.4517	89.3148	154.504	168.296	150.202
ENSG00000086062.12_2	B4GALT1	chr9:33104080-33167354	-	protein_coding	35.5328	34.6585	34.7399	38.2297	37.3708	33.9976
ENSG00000086065.13_2	CHMP5	chr9:33264877-33282067	+	protein_coding	42.5605	37.8323	38.8564	57.0223	52.4245	45.2779
ENSG00000086102.18_2	NFX1	chr9:33290509-33371155	+	protein_coding	9.28557	8.1878	8.15191	5.20212	4.85841	5.16392
ENSG00000086189.9_2	DIMT1	chr5:61683081-61699766	-	protein_coding	9.87828	10.1644	8.82615	8.47127	9.59371	7.82215
ENSG00000086200.16_3	IPO11	chr5:61699799-61924409	+	protein_coding	9.02508	7.84307	8.52067	8.75269	11.2774	8.07955
ENSG00000086232.12_3	EIF2AK1	chr7:6061875-6098861	-	protein_coding	35.3394	38.426	34.1312	24.0497	24.0439	22.4506
ENSG00000086289.11_3	EPDR1	chr7:37723446-37991543	+	protein_coding	14.6191	15.3504	14.3045	30.0912	31.7079	27.3903
ENSG00000086300.15_2	SNX10	chr7:26331515-26413949	+	protein_coding	5.98617	6.35684	6.25594	5.37479	13.6529	6.13036
ENSG00000086475.14_2	SEPHS1	chr10:13359424-13390298	-	protein_coding	10.6656	17.3599	15.573	14.5653	9.83705	15.1389
ENSG00000086504.15_2	MRPL28	chr16:417384-420527	-	protein_coding	14.1664	16.2694	14.1811	26.2147	23.7492	20.0316
ENSG00000086544.2_2	ITPKC	chr19:41223008-41246765	+	protein_coding	4.18925	3.75218	3.56093	4.30832	3.88144	3.77073
ENSG00000086589.11_2	RBM22	chr5:150070356-150080669	-	protein_coding	13.6814	13.1781	13.3616	12.9976	14.1472	14.4421
ENSG00000086598.10_2	TMED2	chr12:124069078-124083124	+	protein_coding	51.5844	93.3719	51.9797	48.3978	49.4292	46.0011
ENSG00000086619.13_2	ERO1B	chr1:236378855-236445285	-	protein_coding	3.42618	3.46246	3.98776	5.92188	6.26569	6.169
ENSG00000086666.18_3	ZFAND6	chr15:80351910-80430735	+	protein_coding	6.8137	8.75455	8.42734	13.1874	9.92254	12.8097
ENSG00000086712.12_3	TXLNG	chrX:16804550-16862642	+	protein_coding	32.2385	31.0784	30.9636	26.1016	24.9253	28.4597
ENSG00000086717.18_3	PPEF1	chrX:18694029-18846039	+	protein_coding	0.357939	0.347241	0.342223	1.36058	1.14009	1.27532
ENSG00000086730.16_3	LAT2	chr7:73613982-73644164	+	protein_coding	0.376391	0.29892	0.363723	0.937822	1.04838	0.769033
ENSG00000086758.15_3	HUWE1	chrX:53559057-53713674	-	protein_coding	41.5234	41.3877	39.6813	41.9977	36.0213	38.8883
ENSG00000086827.8_3	ZW10	chr11:113603909-113644533	-	protein_coding	17.8551	17.1323	15.3968	19.0923	17.9895	17.8789
ENSG00000086848.14_3	ALG9	chr11:111652919-111742305	-	protein_coding	3.37506	3.3361	3.26303	2.74608	2.71323	2.51504
ENSG00000087008.15_2	ACOX3	chr4:8368009-8442450	-	protein_coding	0.948562	0.957422	1.0971	0.521471	0.312082	0.566679
ENSG00000087053.18_2	MTMR2	chr11:95566046-95658479	-	protein_coding	25.6795	24.7878	19.1232	38.9726	36.641	32.4677
ENSG00000087074.7_3	PPP1R15A	chr19:49375649-49379314	+	protein_coding	40.4759	36.058	43.4547	12.4925	15.11	13.4119
ENSG00000087077.13_3	TRIP6	chr7:100464760-100471076	+	protein_coding	30.2687	26.0145	31.3524	23.097	24.8553	26.6001
ENSG00000087086.14_3	FTL	chr19:49468558-49470135	+	protein_coding	448.592	525.285	509.147	583.334	700.432	614.432
ENSG00000087087.19_4	SRRT	chr7:100472733-100486285	+	protein_coding	17.1251	17.5683	16.4022	25.3757	30.9335	26.538
ENSG00000087088.19_3	BAX	chr19:49458072-49465055	+	protein_coding	6.81692	7.94143	8.12865	11.5464	9.60924	10.5222
ENSG00000087095.12_2	NLK	chr17:26368763-26523407	+	protein_coding	7.22035	7.18867	6.45976	11.5176	9.57031	11.009
ENSG00000087111.20_3	PIGS	chr17:26880401-26898890	-	protein_coding	8.72868	8.86977	8.51811	9.04086	9.36788	8.52694
ENSG00000087152.15_2	ATXN7L3	chr17:42269173-42277481	-	protein_coding	8.02656	9.7292	9.16713	18.2934	20.6752	18.0396
ENSG00000087157.18_2	PGS1	chr17:76374721-76421195	+	protein_coding	3.38087	4.24998	4.47578	3.85233	5.23336	3.89685
ENSG00000087191.12_3	PSMC5	chr17:61904512-61909386	+	protein_coding	22.2429	23.9708	22.6182	24.8476	26.3089	24.9444
ENSG00000087206.16_3	UIMC1	chr5:176332006-176449634	-	protein_coding	6.69903	6.47054	6.45374	10.1698	8.15499	8.43987
ENSG00000087245.12_3	MMP2	chr16:55423612-55540603	+	protein_coding	6.60045	5.74796	4.93062	12.1444	10.21	10.6203
ENSG00000087253.12_3	LPCAT2	chr16:55542910-55620582	+	protein_coding	2.88813	2.51031	2.64329	8.01027	9.82771	7.56873
ENSG00000087258.14_3	GNAO1	chr16:56225259-56391369	+	protein_coding	1.26223	1.42161	1.45164	1.19256	1.09016	2.84439
ENSG00000087263.16_2	OGFOD1	chr16:56485402-56513012	+	protein_coding	14.4126	12.895	14.098	12.7057	12.4537	10.9984
ENSG00000087266.15_3	SH3BP2	chr4:2794750-2842825	+	protein_coding	3.54111	0.947716	2.25364	1.11932	0.936878	1.32321
ENSG00000087269.15_2	NOP14	chr4:2939660-2965112	-	protein_coding	20.7926	17.9472	18.6816	12.6199	14.9735	13.794
ENSG00000087274.16_3	ADD1	chr4:2845584-2931803	+	protein_coding	3.58423	5.87275	5.79153	4.23537	5.66541	3.23493
ENSG00000087299.11_2	L2HGDH	chr14:50704281-50779266	-	protein_coding	4.00894	4.46681	4.49926	4.45549	4.10903	4.39904
ENSG00000087301.8_3	TXNDC16	chr14:52897308-53019240	-	protein_coding	4.63606	3.97985	4.02378	6.09608	4.68612	5.92692
ENSG00000087302.8_2	C14orf166	chr14:52456193-52477409	+	protein_coding	20.8561	17.8877	18.9107	19.7071	17.6539	17.8269
ENSG00000087338.4_2	GMCL1	chr2:70056774-70108528	+	protein_coding	12.7265	11.5064	11.7056	14.6897	13.5919	13.6303
ENSG00000087365.15_3	SF3B2	chr11:65818200-65836779	+	protein_coding	44.3095	43.1486	40.0117	40.0704	44.5611	37.1388
ENSG00000087448.9_2	KLHL42	chr12:27932953-27955973	+	protein_coding	8.47064	7.93218	8.20673	7.42757	6.20894	7.62933
ENSG00000087460.24_3	GNAS	chr20:57414773-57486247	+	protein_coding	56.8007	40.3643	54.9266	55.8278	59.9966	53.6381
ENSG00000087470.17_2	DNM1L	chr12:32832134-32898584	+	protein_coding	19.6123	16.9572	15.5462	17.8266	15.0108	15.3818
ENSG00000087494.15_3	PTHLH	chr12:28111017-28125638	-	protein_coding	0.674067	0.258164	0.25778	1.80306	1.50814	1.38784
ENSG00000087502.17_3	ERGIC2	chr12:29490285-29534122	-	protein_coding	26.8199	21.8176	25.1658	25.6656	22.0226	24.9324
ENSG00000087510.6_2	TFAP2C	chr20:55204358-55214339	+	protein_coding	14.8004	16.0384	15.9008	27.902	30.5111	26.7095
ENSG00000087586.17_2	AURKA	chr20:54944445-54967393	-	protein_coding	27.8355	25.1868	27.9948	72.6687	70.4354	68.6437
ENSG00000087842.10_2	PIR	chrX:15402921-15511687	-	protein_coding	12.4059	17.1331	10.8347	14.7491	16.2983	15.596
ENSG00000087884.14_3	AAMDC	chr11:77532155-77629478	+	protein_coding	5.79368	4.33654	5.66977	5.92474	5.30359	5.72544
ENSG00000087903.12_3	RFX2	chr19:5993175-6199583	-	protein_coding	1.15775	1.00723	1.06058	1.04087	0.64707	1.29118
ENSG00000087995.15_2	METTL2A	chr17:60501228-60528183	+	protein_coding	11.2638	11.2577	12.5132	10.4119	12.0435	10.5717
ENSG00000088035.15_2	ALG6	chr1:63833261-63904233	+	protein_coding	2.80446	2.61397	2.37786	2.3673	2.01149	2.37389
ENSG00000088038.17_3	CNOT3	chr19:54641444-54659419	+	protein_coding	6.01273	6.47462	6.09348	7.27214	7.35612	7.94166
ENSG00000088179.8_3	PTPN4	chr2:120517207-120741394	+	protein_coding	5.04147	4.6359	5.13637	7.0478	5.77022	7.27447
ENSG00000088205.12_2	DDX18	chr2:118572226-118589955	+	protein_coding	31.7735	30.5767	32.2391	24.8861	24.7026	24.7785
ENSG00000088247.17_4	KHSRP	chr19:6413359-6424805	-	protein_coding	32.3135	36.2825	35.5939	34.8588	36.664	30.8462
ENSG00000088256.8_2	GNA11	chr19:3094408-3124002	+	protein_coding	6.44895	7.01062	6.64879	3.04973	3.14896	2.79562
ENSG00000088280.18_3	ASAP3	chr1:23755056-23811061	-	protein_coding	2.63494	2.36217	2.12346	2.62208	2.94101	3.06484
ENSG00000088298.12_2	EDEM2	chr20:33703160-33735167	-	protein_coding	9.24792	8.28245	8.08661	14.6333	11.6153	11.9223
ENSG00000088305.18_2	DNMT3B	chr20:31350191-31397162	+	protein_coding	1.79945	2.38941	2.13408	3.06643	3.07216	3.60683
ENSG00000088325.15_2	TPX2	chr20:30327074-30389608	+	protein_coding	103.618	91.9055	97.2236	108.631	110.753	109.605
ENSG00000088356.5_2	PDRG1	chr20:30532145-30539895	-	protein_coding	13.9231	13.3039	14.6984	25.9965	26.7591	21.6432
ENSG00000088367.21_3	EPB41L1	chr20:34679426-34820721	+	protein_coding	8.39249	7.85586	8.83547	6.37667	5.8421	7.02666
ENSG00000088387.18_3	DOCK9	chr13:99445683-99738879	-	protein_coding	5.12989	4.67743	4.75246	4.42879	3.47915	4.59773
ENSG00000088448.14_3	ANKRD10	chr13:111530887-111567416	-	protein_coding	28.8091	31.8884	31.3784	30.3184	35.5563	33.0583
ENSG00000088451.10_2	TGDS	chr13:95226305-95248511	-	protein_coding	17.741	15.8034	15.6728	11.2232	10.0532	10.91
ENSG00000088543.14_2	C3orf18	chr3:50595456-50608458	-	protein_coding	2.58878	2.05459	2.56473	3.24956	2.23514	3.34973
ENSG00000088682.13_3	COQ9	chr16:57481337-57495187	+	protein_coding	5.8398	6.4486	6.73739	2.70617	2.81225	2.86024
ENSG00000088726.15_3	TMEM40	chr3:12775024-12810956	-	protein_coding	2.56659	2.63132	2.84016	1.50102	1.64112	1.50376
ENSG00000088727.12_2	KIF9	chr3:47269516-47324941	-	protein_coding	1.38656	0.842897	0.624134	0.666074	0.672797	0.671293
ENSG00000088756.12_2	ARHGAP28	chr18:6729717-6915715	+	protein_coding	0.328719	0.81805	0.821514	0.41677	0.779871	0.803976
ENSG00000088766.11_2	CRLS1	chr20:5986736-6020699	+	protein_coding	5.55064	5.61714	5.24779	5.08568	5.48971	4.52274
ENSG00000088808.16_2	PPP1R13B	chr14:104200089-104313927	-	protein_coding	1.19691	1.25403	1.08297	0.904717	1.02789	1.27908
ENSG00000088812.17_3	ATRN	chr20:3451687-3631769	+	protein_coding	3.59989	3.28171	3.32769	3.27085	3.09691	2.98188
ENSG00000088826.17_2	SMOX	chr20:4101627-4168394	+	protein_coding	14.9178	14.6447	13.8791	17.5135	19.7066	11.5324
ENSG00000088832.16_3	FKBP1A	chr20:1349622-1373816	-	protein_coding	14.3538	13.3521	13.1478	16.9493	15.8058	18.3437
ENSG00000088833.17_3	NSFL1C	chr20:1422807-1454487	-	protein_coding	7.85186	8.40352	7.85899	9.48098	10.3477	9.4306
ENSG00000088836.12_3	SLC4A11	chr20:3208063-3219836	-	protein_coding	0.926361	0.696962	0.892659	2.37426	2.4311	2.41177
ENSG00000088854.12_3	C20orf194	chr20:3229951-3388272	-	protein_coding	0.30124	0.260855	0.255641	0.5125	0.379293	0.653898
ENSG00000088876.11_3	ZNF343	chr20:2462463-2505348	-	protein_coding	3.46536	1.81822	3.24565	2.89551	2.9257	2.92323
ENSG00000088888.17_2	MAVS	chr20:3827446-3856770	+	protein_coding	8.43397	7.94227	8.94827	4.66355	3.88209	6.24994
ENSG00000088899.14_2	LZTS3	chr20:3143263-3154238	-	protein_coding	0.784118	0.51812	0.575928	1.1407	0.858733	1.30368
ENSG00000088930.7_2	XRN2	chr20:21283942-21370465	+	protein_coding	42.955	44.9161	42.6545	41.6774	40.5166	40.7344
ENSG00000088970.15_3	KIZ	chr20:21106624-21227260	+	protein_coding	4.6577	5.2043	5.06752	3.0635	3.07937	3.66959
ENSG00000088986.10_3	DYNLL1	chr12:120907653-120936296	+	protein_coding	25.4868	25.3488	27.83	49.646	51.1854	46.9515
ENSG00000088992.17_2	TESC	chr12:117476728-117537284	-	protein_coding	3.26602	3.6181	2.33566	9.54632	10.6374	9.16856
ENSG00000089006.16_3	SNX5	chr20:17922241-17949623	-	protein_coding	10.2679	9.7909	9.79673	4.47673	4.95649	4.70372
ENSG00000089009.15_2	RPL6	chr12:112842994-112856642	-	protein_coding	168.285	153.351	180.222	144.93	187.775	151.415
ENSG00000089022.13_2	MAPKAPK5	chr12:112279782-112340042	+	protein_coding	3.57283	3.17253	2.96899	1.58658	1.38987	1.76155
ENSG00000089048.14_2	ESF1	chr20:13694969-13765532	-	protein_coding	44.2348	37.7345	39.5589	36.3903	20.4218	35.7889
ENSG00000089050.15_3	RBBP9	chr20:18467184-18477887	-	protein_coding	10.466	9.26655	9.30273	8.68105	7.97281	8.30662
ENSG00000089053.12_2	ANAPC5	chr12:121746048-121837699	-	protein_coding	10.2051	10.1377	9.54063	7.64379	7.43395	7.24192
ENSG00000089057.14_2	SLC23A2	chr20:4833002-4990939	-	protein_coding	2.62876	2.206	2.68062	2.38909	1.87374	2.34524
ENSG00000089060.11_2	SLC8B1	chr12:113736564-113797298	-	protein_coding	4.67066	4.06404	3.46972	4.51857	4.59579	6.44455
ENSG00000089063.14_2	TMEM230	chr20:5048878-5093749	-	protein_coding	16.3113	15.4632	16.7604	14.2352	13.0335	13.4155
ENSG00000089094.18_3	KDM2B	chr12:121866900-122018920	-	protein_coding	2.79345	2.69833	2.67939	2.37312	2.50754	2.59605
ENSG00000089123.15_3	TASP1	chr20:13370039-13619587	-	protein_coding	4.74742	3.76951	3.91059	4.89445	4.74891	4.55748
ENSG00000089127.12_3	OAS1	chr12:113344582-113371027	+	protein_coding	4.11095	3.37151	3.25096	9.29393	10.7671	8.38734
ENSG00000089154.10_2	GCN1	chr12:120565007-120632513	-	protein_coding	19.4982	18.6625	17.3777	17.2281	15.6641	17.0315
ENSG00000089157.15_3	RPLP0	chr12:120634489-120639038	-	protein_coding	103.615	163.925	126.372	84.0497	100.095	81.7188
ENSG00000089159.16_3	PXN	chr12:120648242-120703574	-	protein_coding	28.9385	27.9472	30.1096	32.7007	30.4426	35.2361
ENSG00000089163.4_2	SIRT4	chr12:120740119-120751052	+	protein_coding	0.647704	0.334443	0.631049	2.50347	3.00388	2.66525
ENSG00000089177.18_3	KIF16B	chr20:16252749-16554079	-	protein_coding	3.50491	2.69846	2.79947	3.10869	2.58118	3.28437
ENSG00000089195.14_2	TRMT6	chr20:5917881-5931204	-	protein_coding	7.64603	7.35167	7.1713	12.4731	11.3497	13.3589
ENSG00000089220.4_2	PEBP1	chr12:118573663-118583389	+	protein_coding	144.678	149.782	156.055	184.773	218.769	183.578
ENSG00000089234.15_3	BRAP	chr12:112079950-112123790	-	protein_coding	8.04325	7.35642	7.70455	7.11944	6.06326	6.36395
ENSG00000089248.6_3	ERP29	chr12:112451120-112461255	+	protein_coding	46.4898	51.9819	52.7388	44.744	45.8694	42.6669
ENSG00000089280.18_2	FUS	chr16:31191431-31206192	+	protein_coding	31.1157	31.3432	32.8537	39.7854	42.8156	42.7334
ENSG00000089289.15_2	IGBP1	chrX:69353299-69386174	+	protein_coding	56.7012	55.8074	47.7256	34.3138	36.9949	36.6704
ENSG00000089327.14_3	FXYD5	chr19:35645633-35660786	+	protein_coding	23.2985	23.6847	22.1616	26.503	26.481	24.3552
ENSG00000089335.20_3	ZNF302	chr19:35168544-35177302	+	protein_coding	13.5082	17.4865	16.0119	11.9583	11.3144	14.9125
ENSG00000089351.14_3	GRAMD1A	chr19:35485688-35517375	+	protein_coding	9.64969	10.3855	9.96998	7.38389	8.01068	8.047
ENSG00000089356.18_4	FXYD3	chr19:35606783-35615228	+	protein_coding	0.717062	0.810543	0.798603	0.921317	0.731561	0.60955
ENSG00000089486.16_3	CDIP1	chr16:4560676-4588829	-	protein_coding	6.60225	7.20922	4.1917	7.14431	8.7547	7.97883
ENSG00000089558.8_3	KCNH4	chr17:40308909-40333296	-	protein_coding	0.362131	0.276709	0.143982	0.906395	1.00205	1.29518
ENSG00000089597.16_2	GANAB	chr11:62392298-62414198	-	protein_coding	72.4168	71.3378	81.6502	52.2204	52.733	48.3586
ENSG00000089639.10_2	GMIP	chr19:19740285-19754476	-	protein_coding	4.33461	4.52793	4.03988	2.83644	2.80697	3.22054
ENSG00000089682.16_2	RBM41	chrX:106307650-106362053	-	protein_coding	8.23295	7.99171	7.86383	7.15911	4.37398	9.06232
ENSG00000089685.14_3	BIRC5	chr17:76210267-76221717	+	protein_coding	9.4746	9.59253	9.98355	10.1476	11.8277	9.71558
ENSG00000089693.10_3	MLF2	chr12:6857162-6876641	-	protein_coding	20.2338	23.3469	25.8608	39.4926	46.8861	39.2284
ENSG00000089723.9_2	OTUB2	chr14:94492675-94515276	+	protein_coding	0.098962	0.0697908	0.165761	1.00636	1.04096	1.01206
ENSG00000089737.16_2	DDX24	chr14:94514637-94547591	-	protein_coding	5.09322	7.67009	5.08021	5.51451	6.1365	6.0017
ENSG00000089775.11_2	ZBTB25	chr14:64915824-64971931	-	protein_coding	2.07704	1.37499	1.73089	1.08312	0.951743	1.38186
ENSG00000089818.17_2	NECAP1	chr12:8229535-8250455	+	protein_coding	1.5794	1.73957	1.73471	1.14914	2.55496	2.57003
ENSG00000089876.11_4	DHX32	chr10:127524906-127585005	-	protein_coding	17.6359	17.9255	15.2091	20.7234	20.0209	19.8634
ENSG00000089902.9_2	RCOR1	chr14:103058998-103196913	+	protein_coding	11.5535	10.5541	9.89358	13.364	12.9173	12.5838
ENSG00000089916.17_4	GPATCH2L	chr14:76618259-76720685	+	protein_coding	1.43361	1.47123	1.27414	1.17148	1.54141	2.68472
ENSG00000090006.17_2	LTBP4	chr19:41098789-41135723	+	protein_coding	9.61834	8.22751	8.06122	3.73258	4.57672	5.11122
ENSG00000090013.9_2	BLVRB	chr19:40953696-40971747	-	protein_coding	19.1976	19.0524	17.9236	18.538	15.0831	14.6964
ENSG00000090020.10_2	SLC9A1	chr1:27425306-27493472	-	protein_coding	2.71799	2.55494	2.80671	4.49994	5.75528	6.01513
ENSG00000090054.13_2	SPTLC1	chr9:94794281-94877666	-	protein_coding	16.6939	15.9439	16.8055	21.0711	19.6641	18.9884
ENSG00000090060.17_2	PAPOLA	chr14:96967770-97033448	+	protein_coding	14.3983	15.0497	14.0721	16.0896	14.8607	16.0678
ENSG00000090061.17_3	CCNK	chr14:99947506-100001381	+	protein_coding	5.38453	4.87662	4.87616	6.46067	6.44556	6.38013
ENSG00000090097.21_3	PCBP4	chr3:51991470-52008032	-	protein_coding	2.89437	2.30466	2.52237	2.17998	2.19414	2.20599
ENSG00000090238.11_3	YPEL3	chr16:30103635-30108236	-	protein_coding	3.48797	4.26108	3.48163	7.28978	5.44966	5.56649
ENSG00000090263.15_3	MRPS33	chr7:140702410-140715028	-	protein_coding	2.94757	2.98735	3.35117	1.81991	2.52398	2.35389
ENSG00000090266.12_4	NDUFB2	chr7:140390577-140422590	+	protein_coding	9.90064	10.2013	8.68456	9.14846	11.2414	10.5744
ENSG00000090273.13_3	NUDC	chr1:27226729-27273353	+	protein_coding	74.7709	69.0501	64.5272	71.337	75.1549	65.2542
ENSG00000090316.15_2	MAEA	chr4:1283639-1333935	+	protein_coding	3.36513	2.08811	2.36909	2.10947	1.88653	2.17078
ENSG00000090339.8_2	ICAM1	chr19:10381511-10397291	+	protein_coding	14.3395	14.3669	13.2613	20.7726	21.6378	18.7274
ENSG00000090372.14_2	STRN4	chr19:47222764-47250251	-	protein_coding	4.36643	4.94549	4.48091	2.27686	2.38387	2.37985
ENSG00000090376.10_3	IRAK3	chr12:66582659-66648402	+	protein_coding	3.24208	2.89816	2.97324	1.41577	1.01222	1.49928
ENSG00000090432.6_2	MUL1	chr1:20825941-20834654	-	protein_coding	6.61194	6.1516	6.81877	7.12824	7.49061	6.25206
ENSG00000090447.11_2	TFAP4	chr16:4307187-4323076	-	protein_coding	8.06912	5.47793	7.49985	3.82461	3.85823	3.77797
ENSG00000090470.14_3	PDCD7	chr15:65409717-65426174	-	protein_coding	24.2332	24.4422	25.0021	11.6228	10.9565	12.5399
ENSG00000090487.10_2	SPG21	chr15:65255362-65282648	-	protein_coding	22.0596	25.571	23.8019	20.0886	21.7999	17.5446
ENSG00000090520.11_3	DNAJB11	chr3:186285192-186303589	+	protein_coding	10.4997	7.7875	9.12073	13.5105	16.017	13.1034
ENSG00000090530.9_3	P3H2	chr3:189674517-189840226	-	protein_coding	11.1475	11.4302	11.5605	9.98631	9.43393	9.06649
ENSG00000090554.12_3	FLT3LG	chr19:49977464-49989488	+	protein_coding	0.712299	0.811815	0.563933	0.68568	0.623222	0.722211
ENSG00000090565.15_4	RAB11FIP3	chr16:475619-573011	+	protein_coding	6.24132	6.52	5.82725	2.97323	3.47647	3.95117
ENSG00000090581.9_3	GNPTG	chr16:1401924-1414114	+	protein_coding	4.30157	4.31871	4.28272	2.0293	2.73785	3.0258
ENSG00000090615.14_4	GOLGA3	chr12:133345495-133405444	-	protein_coding	14.0658	12.6028	8.89011	10.1459	10.8726	14.956
ENSG00000090621.13_3	PABPC4	chr1:40026488-40042462	-	protein_coding	27.0359	29.5783	21.8421	14.8148	16.6296	11.4789
ENSG00000090661.11_2	CERS4	chr19:8271620-8327305	+	protein_coding	1.23536	1.12461	0.889398	1.19355	1.21797	1.81399
ENSG00000090674.15_3	MCOLN1	chr19:7587512-7598895	+	protein_coding	2.4295	3.10368	3.15711	5.90215	5.83378	5.82627
ENSG00000090686.15_2	USP48	chr1:22004791-22110099	-	protein_coding	10.7692	10.695	9.04611	11.0049	9.9357	11.2621
ENSG00000090776.5_2	EFNB1	chrX:68048840-68061990	+	protein_coding	2.81166	2.3943	2.86472	9.79849	10.5069	9.50385
ENSG00000090857.13_2	PDPR	chr16:70147529-70196440	+	protein_coding	6.33408	4.87754	2.33654	4.17385	1.62341	5.04957
ENSG00000090861.15_3	AARS	chr16:70286198-70323446	-	protein_coding	62.2965	67.2624	62.0329	39.8405	38.2887	36.5248
ENSG00000090863.11_3	GLG1	chr16:74481325-74641042	-	protein_coding	5.62107	5.15331	5.88107	6.04783	5.71421	5.46568
ENSG00000090889.11_2	KIF4A	chrX:69509940-69640682	+	protein_coding	27.498	23.8542	24.7179	30.5518	30.4368	29.2374
ENSG00000090905.18_3	TNRC6A	chr16:24621530-24838953	+	protein_coding	8.48159	7.91084	8.19601	7.11018	6.09945	7.8604
ENSG00000090924.14_3	PLEKHG2	chr19:39903225-39919055	+	protein_coding	2.02857	2.76243	2.61604	2.9735	2.51177	2.48743
ENSG00000090932.10_2	DLL3	chr19:39989535-39999121	+	protein_coding	1.32913	1.32942	1.41676	1.98902	1.92909	1.67614
ENSG00000090971.4_2	NAT14	chr19:55996371-55998935	+	protein_coding	0.867065	2.17519	3.19206	1.94858	1.84505	1.96816
ENSG00000090975.12_3	PITPNM2	chr12:123468027-123634562	-	protein_coding	1.55985	1.74198	1.67115	1.59565	1.20191	2.06406
ENSG00000090989.17_2	EXOC1	chr4:56719782-56771200	+	protein_coding	5.8191	4.66532	4.30575	3.71589	3.0475	3.84034
ENSG00000091009.7_3	RBM27	chr5:145583163-145668695	+	protein_coding	20.3637	18.5191	19.397	25.7459	25.46	25.9398
ENSG00000091039.16_3	OSBPL8	chr12:76745577-76953589	-	protein_coding	16.9635	14.778	17.28	21.376	19.0509	20.101
ENSG00000091073.19_3	DTX2	chr7:76090993-76135312	+	protein_coding	4.55685	4.28027	4.23215	5.40337	6.83758	6.55898
ENSG00000091127.13_2	PUS7	chr7:105080108-105162714	-	protein_coding	17.7927	17.4921	16.734	5.65246	5.36343	5.77387
ENSG00000091136.13_2	LAMB1	chr7:107564244-107643700	-	protein_coding	44.6845	47.108	41.3517	28.2452	23.4214	24.4005
ENSG00000091140.13_2	DLD	chr7:107531415-107572175	+	protein_coding	21.2354	20.0789	17.4071	17.5076	16.5743	15.8197
ENSG00000091157.13_3	WDR7	chr18:54318574-54703837	+	protein_coding	0.407391	0.751173	0.722045	0.834605	0.990648	0.715177
ENSG00000091164.12_3	TXNL1	chr18:54264439-54318831	-	protein_coding	4.59836	4.80574	5.00666	6.47747	7.423	6.22536
ENSG00000091317.7_2	CMTM6	chr3:32522804-32544900	-	protein_coding	16.5204	14.8607	15.8428	26.5146	27.971	24.984
ENSG00000091409.14_3	ITGA6	chr2:173292082-173371010	+	protein_coding	8.89579	8.54289	9.59621	14.0856	11.3177	12.4049
ENSG00000091436.16_2	MAP3K20	chr2:173940163-174132738	+	protein_coding	7.46637	7.22105	7.20132	3.34908	2.56369	3.25433
ENSG00000091483.6_2	FH	chr1:241660903-241683061	-	protein_coding	75.9933	77.8125	70.8738	48.1419	47.343	46.4169
ENSG00000091490.10_3	SEL1L3	chr4:25749049-25865382	-	protein_coding	3.3428	4.81949	3.97186	3.62652	3.63739	3.72586
ENSG00000091527.15_2	CDV3	chr3:133292574-133309105	+	protein_coding	48.0493	23.2762	24.3805	28.8063	20.8069	38.0846
ENSG00000091542.8_2	ALKBH5	chr17:18086392-18113268	+	protein_coding	23.0419	26.5795	26.8642	37.4802	41.4219	36.0458
ENSG00000091592.15_3	NLRP1	chr17:5402747-5522744	-	protein_coding	4.67433	4.49278	4.76836	2.47769	2.21556	3.2724
ENSG00000091622.15_3	PITPNM3	chr17:6354584-6459814	-	protein_coding	3.23701	3.35441	3.33008	2.74734	2.24446	2.83717
ENSG00000091640.7_2	SPAG7	chr17:4862521-4871167	-	protein_coding	9.4229	10.4984	9.22751	9.22594	10.0373	10.5812
ENSG00000091651.8_3	ORC6	chr16:46723555-46732306	+	protein_coding	6.60871	12.09	6.82019	10.1594	7.90794	10.8648
ENSG00000091732.15_2	ZC3HC1	chr7:129658126-129691291	-	protein_coding	6.41038	6.60609	5.59775	5.88431	6.17973	5.4813
ENSG00000091844.7_2	RGS17	chr6:153325594-153452384	-	protein_coding	0.140813	0.135389	0.246024	1.12489	0.952698	1.3798
ENSG00000091947.9_2	TMEM101	chr17:42088556-42101314	-	protein_coding	6.85819	6.53291	7.1575	2.34742	2.87632	2.2157
ENSG00000091986.15_3	CCDC80	chr3:112315641-112368377	-	protein_coding	3.20478	2.07213	1.85958	3.62874	4.50176	3.41894
ENSG00000092010.14_2	PSME1	chr14:24605367-24608176	+	protein_coding	61.3023	60.9482	57.3294	37.8775	43.7271	36.1141
ENSG00000092020.10_3	PPP2R3C	chr14:35554673-35591723	-	protein_coding	4.96269	5.16714	3.94724	3.33385	3.60425	4.28251
ENSG00000092036.18_4	HAUS4	chr14:23415437-23426370	-	protein_coding	6.74927	6.30246	6.13	3.96931	3.40414	4.32027
ENSG00000092068.19_4	SLC7A8	chr14:23594504-23652883	-	protein_coding	0.205733	0.183365	0.256772	2.09399	2.02595	2.37701
ENSG00000092094.10_2	OSGEP	chr14:20914570-20923264	-	protein_coding	3.73023	3.61673	3.6952	2.29288	2.10702	2.70911
ENSG00000092098.16_3	RNF31	chr14:24615892-24629870	+	protein_coding	2.59101	2.50234	2.42531	1.28821	1.65025	1.63375
ENSG00000092108.20_4	SCFD1	chr14:31091318-31205018	+	protein_coding	6.5638	6.14683	5.62389	6.6335	5.65142	6.35102
ENSG00000092140.14_3	G2E3	chr14:31028329-31089269	+	protein_coding	4.32163	3.02151	3.36187	6.34721	5.27574	5.65903
ENSG00000092148.12_3	HECTD1	chr14:31569318-31677010	-	protein_coding	12.2689	11.6445	11.5989	12.0528	11.0827	11.5004
ENSG00000092199.17_4	HNRNPC	chr14:21677295-21737653	-	protein_coding	57.9934	46.8174	54.9049	44.5227	52.1471	44.1339
ENSG00000092201.9_2	SUPT16H	chr14:21819631-21852425	-	protein_coding	44.6612	41.1453	40.4113	24.6935	22.1987	23.5557
ENSG00000092203.13_4	TOX4	chr14:21944756-21967319	+	protein_coding	3.36148	5.56634	3.38356	6.35928	6.15236	6.83131
ENSG00000092208.16_3	GEMIN2	chr14:39583427-39606177	+	protein_coding	4.73583	4.03503	3.69141	4.41498	5.08123	4.57943
ENSG00000092295.11_3	TGM1	chr14:24718320-24733638	-	protein_coding	1.01264	0.944662	0.757797	0.267224	0.329954	0.535343
ENSG00000092330.15_3	TINF2	chr14:24708849-24711880	-	protein_coding	4.11076	2.81392	2.90446	2.41083	2.12284	2.52543
ENSG00000092439.13_4	TRPM7	chr15:50844670-50979012	-	protein_coding	17.2737	16.5625	16.8769	16.4568	13.9895	16.6502
ENSG00000092445.11_3	TYRO3	chr15:41849873-41875784	+	protein_coding	4.50062	4.94276	4.5409	4.72449	4.51542	4.34738
ENSG00000092470.11_2	WDR76	chr15:44119161-44160617	+	protein_coding	35.2443	33.2124	32.3974	18.3228	15.9407	16.2307
ENSG00000092531.9_2	SNAP23	chr15:42783431-42837554	+	protein_coding	4.46573	5.92908	5.06477	4.19975	4.45382	4.15897
ENSG00000092621.12_3	PHGDH	chr1:120191034-120286849	+	protein_coding	37.8544	42.2026	41.3508	33.5304	36.9673	30.0446
ENSG00000092758.15_3	COL9A3	chr20:61447596-61472511	+	protein_coding	1.79353	2.56826	1.8415	4.35349	4.87904	4.9564
ENSG00000092820.17_2	EZR	chr6:159186773-159240444	-	protein_coding	98.2601	89.068	87.6383	109.221	114.968	97.5201
ENSG00000092841.18_4	MYL6	chr12:56551945-56557280	+	protein_coding	63.3326	65.9997	64.4522	57.6493	69.5699	59.7926
ENSG00000092847.11_3	AGO1	chr1:36335409-36396129	+	protein_coding	4.38097	3.80614	0.784163	3.97874	3.51607	0.899218
ENSG00000092853.13_2	CLSPN	chr1:36185819-36235568	-	protein_coding	19.4121	17.5049	15.1872	15.8986	13.3551	16.0244
ENSG00000092871.16_3	RFFL	chr17:33333009-33416338	-	protein_coding	5.27243	5.2826	4.61954	4.67216	4.98922	4.8115
ENSG00000092929.11_3	UNC13D	chr17:73823306-73840798	-	protein_coding	10.5547	11.1453	9.70971	7.29031	7.59746	7.80172
ENSG00000092931.11_3	MFSD11	chr17:74731947-74777531	+	protein_coding	1.78359	2.13696	1.7077	1.99676	2.03574	3.1666
ENSG00000092964.17_4	DPYSL2	chr8:26371538-26515694	+	protein_coding	23.7624	18.4193	22.9199	42.4019	29.0846	37.8506
ENSG00000092969.11_2	TGFB2	chr1:218519577-218617961	+	protein_coding	5.70079	5.17323	4.94475	17.4456	19.4978	17.9186
ENSG00000092978.10_2	GPATCH2	chr1:217600334-217804424	-	protein_coding	4.70493	4.27252	4.33182	5.29646	5.1098	5.01757
ENSG00000093000.18_3	NUP50	chr22:45559722-45583896	+	protein_coding	16.0925	6.75119	16.1904	14.7718	14.4522	15.2349
ENSG00000093009.9_2	CDC45	chr22:19466982-19508135	+	protein_coding	12.4343	12.7175	10.0929	7.9978	7.44665	7.16413
ENSG00000093010.13_3	COMT	chr22:19929130-19957498	+	protein_coding	4.57202	4.22732	3.7694	2.74917	3.27286	2.61679
ENSG00000093144.18_3	ECHDC1	chr6:127609855-127664754	-	protein_coding	11.4995	9.12075	11.483	10.2338	8.84995	9.43618
ENSG00000093167.17_3	LRRFIP2	chr3:37094147-37225180	-	protein_coding	7.95765	6.64282	6.7785	4.99463	4.79431	5.22526
ENSG00000093183.13_3	SEC22C	chr3:42589461-42642572	-	protein_coding	5.60004	5.58065	6.28713	3.0932	2.58099	3.26865
ENSG00000093217.9_2	XYLB	chr3:38388251-38462839	+	protein_coding	1.33372	1.20132	1.19035	1.00314	0.585921	1.0964
ENSG00000094631.18_3	HDAC6	chrX:48659784-48683392	+	protein_coding	2.71213	2.79015	2.41086	1.41765	1.17233	1.60473
ENSG00000094804.9_2	CDC6	chr17:38443885-38460909	+	protein_coding	24.7618	24.5259	21.037	22.6712	22.6026	21.1063
ENSG00000094841.13_2	UPRT	chrX:74493920-74524435	+	protein_coding	1.58162	3.81992	1.53723	4.87317	2.28223	1.79325
ENSG00000094880.10_2	CDC23	chr5:137523337-137549032	-	protein_coding	18.7174	18.1384	17.3475	15.6919	15.0776	15.2518
ENSG00000094914.12_3	AAAS	chr12:53701240-53718648	-	protein_coding	8.84851	9.01278	9.85096	5.8714	6.56696	7.57626
ENSG00000094916.15_4	CBX5	chr12:54624724-54673917	-	protein_coding	18.5715	18.4599	20.2342	10.8165	8.29608	12.2018
ENSG00000094975.13_2	SUCO	chr1:172501489-172580973	+	protein_coding	4.29262	3.64537	2.74955	5.43601	3.14364	3.62293
ENSG00000095002.13_3	MSH2	chr2:47630108-47789450	+	protein_coding	61.9563	58.052	62.8039	60.4728	53.8138	55.9737
ENSG00000095015.5_2	MAP3K1	chr5:56111401-56191979	+	protein_coding	7.55467	8.50233	7.16728	11.1573	12.0407	10.909
ENSG00000095059.15_2	DHPS	chr19:12786531-12792716	-	protein_coding	8.04093	7.73452	5.83895	6.4068	7.15147	6.46459
ENSG00000095066.11_4	HOOK2	chr19:12873817-12983554	-	protein_coding	1.73796	1.62649	1.41947	1.00363	0.983022	1.17553
ENSG00000095139.13_2	ARCN1	chr11:118443105-118473748	+	protein_coding	42.388	37.9198	36.5325	49.19	31.3485	46.9743
ENSG00000095203.14_2	EPB41L4B	chr9:111934255-112083244	-	protein_coding	3.05899	3.06784	3.00496	4.11553	4.44897	3.62285
ENSG00000095209.11_3	TMEM38B	chr9:108456825-108538893	+	protein_coding	5.66794	5.77091	6.06308	4.1363	3.65448	3.23072
ENSG00000095261.13_1	PSMD5	chr9:123577774-123605262	-	protein_coding	18.6833	18.4176	18.1307	14.6277	12.8671	13.3272
ENSG00000095303.14_4	PTGS1	chr9:125132809-125157982	+	protein_coding	7.83502	9.21515	7.04791	45.3131	47.8594	47.5708
ENSG00000095319.14_3	NUP188	chr9:131709978-131769375	+	protein_coding	13.8956	14.2609	14.3805	19.2766	18.8059	16.8305
ENSG00000095321.16_3	CRAT	chr9:131857089-131873468	-	protein_coding	4.53499	3.81639	4.00265	2.96947	2.70092	2.59464
ENSG00000095370.19_2	SH2D3C	chr9:130500596-130541020	-	protein_coding	0.189905	0.105675	0.271992	0.615474	0.640126	0.649569
ENSG00000095380.10_2	NANS	chr9:100819021-100845357	+	protein_coding	16.6428	14.5604	12.7181	9.32573	10.0744	8.76022
ENSG00000095383.19_2	TBC1D2	chr9:100961281-101018003	-	protein_coding	8.52975	10.1324	10.2322	5.32397	4.92655	5.38785
ENSG00000095397.13_3	WHRN	chr9:117164360-117267730	-	protein_coding	4.40236	4.79543	4.71839	7.36475	6.03051	10.9756
ENSG00000095485.17_3	CWF19L1	chr10:101992055-102027437	-	protein_coding	11.4515	10.8742	10.677	6.16179	7.08798	5.73092
ENSG00000095564.13_2	BTAF1	chr10:93683526-93790082	+	protein_coding	17.052	17.0057	18.2594	11.4531	9.36444	12.9445
ENSG00000095574.11_2	IKZF5	chr10:124750322-124768333	-	protein_coding	6.10923	5.1568	6.19822	5.58972	4.86179	5.74198
ENSG00000095637.21_3	SORBS1	chr10:97071528-97321171	-	protein_coding	0.640551	0.579105	0.528534	2.05603	2.29004	2.2101
ENSG00000095739.10_2	BAMBI	chr10:28966271-28971868	+	protein_coding	2.79669	2.08342	2.55152	13.9705	15.536	13.5653
ENSG00000095752.6_3	IL11	chr19:55875757-55881831	-	protein_coding	2.34571	1.25889	1.50769	3.04442	2.79685	3.04809
ENSG00000095787.21_3	WAC	chr10:28821422-28912041	+	protein_coding	16.9804	16.934	16.9576	16.3313	15.5429	16.0083
ENSG00000095794.19_4	CREM	chr10:35415719-35501886	+	protein_coding	1.54697	1.82851	1.88216	6.06556	5.77291	4.37637
ENSG00000095906.16_3	NUBP2	chr16:1832902-1839192	+	protein_coding	4.51926	5.11164	3.7488	4.853	5.73232	4.63816
ENSG00000095932.6_3	SMIM24	chr19:3473984-3480540	-	protein_coding	0.0723604	0.156478	0.0660907	2.51756	3.71327	2.06457
ENSG00000095951.16_3	HIVEP1	chr6:12008995-12165232	+	protein_coding	3.02281	3.50504	5.55197	2.96481	2.79226	3.58214
ENSG00000096060.14_2	FKBP5	chr6:35541362-35696360	-	protein_coding	4.14524	3.7342	3.3514	1.91376	1.75139	1.76098
ENSG00000096063.15_3	SRPK1	chr6:35800743-35889119	-	protein_coding	31.7316	30.2381	31.0439	22.982	22.8415	24.6423
ENSG00000096070.19_3	BRPF3	chr6:36164521-36200567	+	protein_coding	5.60964	5.86292	5.62548	2.90068	4.39386	4.18124
ENSG00000096080.11_3	MRPS18A	chr6:43639040-43655528	-	protein_coding	30.6316	32.006	31.4075	40.8113	41.8457	38.2925
ENSG00000096092.5_2	TMEM14A	chr6:52535907-52551386	+	protein_coding	36.076	35.1459	37.8448	48.1844	47.8561	43.9982
ENSG00000096093.15_3	EFHC1	chr6:52226921-52394684	+	protein_coding	2.19334	1.59762	2.06359	1.03482	1.04107	1.35348
ENSG00000096384.19_2	HSP90AB1	chr6:44213903-44221625	+	protein_coding	551.642	561.027	582.666	567.087	651.286	535.203
ENSG00000096401.7_2	CDC5L	chr6:44355262-44418163	+	protein_coding	25.4038	22.9574	22.6491	24.1603	24.5694	23.8042
ENSG00000096433.10_2	ITPR3	chr6:33588142-33664351	+	protein_coding	37.7577	38.8117	37.0653	14.23	12.8771	16.4047
ENSG00000096654.15_2	ZNF184	chr6:27418522-27440897	-	protein_coding	7.40066	5.79247	6.41216	10.7213	10.295	10.5111
ENSG00000096696.13_3	DSP	chr6:7541808-7586950	+	protein_coding	49.5871	40.7505	43.9811	44.6738	41.1234	43.4366
ENSG00000096717.11_2	SIRT1	chr10:69644427-69678147	+	protein_coding	36.632	33.3402	33.7363	26.5303	28.2479	26.4542
ENSG00000096746.17_2	HNRNPH3	chr10:70090931-70102948	+	protein_coding	58.6421	54.5506	57.939	73.9451	66.2234	79.2877
ENSG00000096872.15_2	IFT74	chr9:26947037-27062928	+	protein_coding	3.60977	2.92372	2.84973	1.97116	1.21888	1.46536
ENSG00000096968.13_3	JAK2	chr9:4984390-5128183	+	protein_coding	2.35459	2.12776	2.15054	3.29606	2.69198	3.3245
ENSG00000097007.17_3	ABL1	chr9:133589333-133763062	+	protein_coding	25.4763	25.8538	23.5283	16.9578	17.4237	16.8476
ENSG00000097021.19_2	ACOT7	chr1:6324329-6454451	-	protein_coding	16.8052	20.0947	17.4993	29.448	33.5144	26.5928
ENSG00000097033.14_2	SH3GLB1	chr1:87170253-87213867	+	protein_coding	20.0505	18.7682	19.9426	15.6491	14.885	14.6489
ENSG00000097046.12_2	CDC7	chr1:91966450-91991321	+	protein_coding	22.5509	20.069	19.4537	19.577	16.9828	20.025
ENSG00000097096.8_2	SYDE2	chr1:85622556-85666729	-	protein_coding	0.638298	0.959423	0.663965	0.265782	0.356537	0.198309
ENSG00000099194.5_2	SCD	chr10:102106881-102124591	+	protein_coding	37.9956	42.4124	35.5838	109.387	108.919	108.911
ENSG00000099203.6_3	TMED1	chr19:10943114-10946994	-	protein_coding	6.33692	4.36373	5.24844	8.59719	9.75806	6.78557
ENSG00000099204.18_3	ABLIM1	chr10:116190872-116444762	-	protein_coding	19.3771	17.7409	19.298	13.2997	12.367	12.7107
ENSG00000099219.13_2	ERMP1	chr9:5765076-5833117	-	protein_coding	11.3669	11.6972	11.1217	10.6233	11.179	11.1855
ENSG00000099246.16_2	RAB18	chr10:27793103-27831166	+	protein_coding	5.39816	4.5005	4.40619	5.76215	6.18336	5.95745
ENSG00000099250.17_3	NRP1	chr10:33466420-33625190	-	protein_coding	2.41052	1.79399	2.41804	2.23048	2.41452	2.44198
ENSG00000099256.18_2	PRTFDC1	chr10:25137536-25241533	-	protein_coding	8.54749	9.25474	9.69005	3.84213	3.54767	3.97262
ENSG00000099260.10_2	PALMD	chr1:100111499-100160097	+	protein_coding	1.1985	1.01689	0.861608	1.41064	1.21439	1.45185
ENSG00000099282.9_3	TSPAN15	chr10:71211229-71267425	+	protein_coding	18.3684	20.6952	20.5355	29.6058	30.2444	27.6671
ENSG00000099290.15_3	WASHC2A	chr10:51827648-51893266	+	protein_coding	21.4338	19.3041	20.9966	14.8795	12.4274	17.3183
ENSG00000099308.10_3	MAST3	chr19:18208603-18262502	+	protein_coding	1.67465	1.56788	1.47288	3.56033	3.00832	3.44956
ENSG00000099326.8_2	MZF1	chr19:59073298-59084942	-	protein_coding	2.93252	2.71836	3.24411	1.52603	1.49206	2.77784
ENSG00000099330.8_2	OCEL1	chr19:17337013-17340028	+	protein_coding	5.14618	5.59725	4.35044	7.30185	9.51666	6.69484
ENSG00000099331.13_3	MYO9B	chr19:17186591-17325346	+	protein_coding	7.26911	7.72768	6.80234	8.82483	9.11954	10.3639
ENSG00000099337.4_2	KCNK6	chr19:38810484-38822716	+	protein_coding	5.13397	4.39211	4.37082	5.20232	4.67097	5.87151
ENSG00000099341.11_3	PSMD8	chr19:38865176-38874464	+	protein_coding	29.0298	31.2737	30.1405	32.3825	35.1086	31.7983
ENSG00000099364.16_3	FBXL19	chr16:30934376-30960104	+	protein_coding	3.69009	2.95216	3.68822	8.68776	10.2589	7.43487
ENSG00000099365.10_2	STX1B	chr16:31000577-31021982	-	protein_coding	1.01439	0.955516	0.699422	0.683363	0.627964	0.850324
ENSG00000099377.13_3	HSD3B7	chr16:30996528-31000473	+	protein_coding	9.55494	8.87414	9.67733	10.7351	11.7448	10.7322
ENSG00000099381.17_2	SETD1A	chr16:30968615-30995985	+	protein_coding	10.4833	11.6742	10.6296	12.1647	12.5972	14.6199
ENSG00000099385.11_4	BCL7C	chr16:30844947-30906281	-	protein_coding	9.44049	8.62217	7.99026	7.74874	7.55465	7.20806
ENSG00000099399.5_3	MAGEB2	chrX:30233677-30238206	+	protein_coding	6.9792	7.28189	7.37162	6.76739	7.76547	6.50929
ENSG00000099617.3_2	EFNA2	chr19:1286153-1300236	+	protein_coding	0.496498	0.778117	0.931756	2.15729	2.13388	1.63293
ENSG00000099622.13_3	CIRBP	chr19:1259383-1274879	+	protein_coding	7.41016	6.95607	6.25131	1.9109	1.4625	2.92221
ENSG00000099624.7_3	ATP5D	chr19:1241745-1244825	+	protein_coding	6.1405	6.34561	6.03257	5.46986	6.80676	5.73174
ENSG00000099625.12_3	CBARP	chr19:1228286-1238026	-	protein_coding	1.18573	1.81204	1.53271	2.15378	2.81659	2.37182
ENSG00000099783.11_3	HNRNPM	chr19:8509651-8553998	+	protein_coding	62.9338	71.9351	70.4549	50.5839	64.5968	54.3714
ENSG00000099785.10_2	MARCH2	chr19:8478154-8503901	+	protein_coding	1.51568	1.90004	1.4398	2.1336	2.26389	2.32597
ENSG00000099795.6_2	NDUFB7	chr19:14676890-14682874	-	protein_coding	94.9404	90.2784	82.9214	67.2393	82.8076	65.1934
ENSG00000099797.13_3	TECR	chr19:14627897-14676792	+	protein_coding	7.54611	8.14601	9.03053	9.67254	10.6308	9.14911
ENSG00000099800.7_3	TIMM13	chr19:2425622-2427892	-	protein_coding	14.3934	13.8621	13.3111	15.5818	15.6484	15.3084
ENSG00000099804.8_2	CDC34	chr19:531712-542092	+	protein_coding	17.8174	19.3409	17.8871	20.5656	27.503	21.3795
ENSG00000099810.18_3	MTAP	chr9:21802542-21937650	+	protein_coding	1.38584	1.48906	2.75411	1.59946	5.27718	5.7537
ENSG00000099812.8_2	MISP	chr19:751126-764318	+	protein_coding	28.3983	31.5092	30.9821	15.0344	15.4361	13.1541
ENSG00000099814.15_2	CEP170B	chr14:105331617-105363107	+	protein_coding	5.21005	5.44389	5.13007	4.76502	5.07319	4.79457
ENSG00000099817.11_2	POLR2E	chr19:1086578-1095379	-	protein_coding	6.93044	8.05187	7.74993	8.05205	9.46166	7.20118
ENSG00000099821.13_2	POLRMT	chr19:617224-633604	-	protein_coding	9.93105	10.5912	9.03004	13.3249	16.3833	13.7625
ENSG00000099822.2_2	HCN2	chr19:589893-617159	+	protein_coding	3.32874	3.49165	3.68727	7.38459	7.2857	6.26728
ENSG00000099834.18_2	CDHR5	chr11:616565-626078	-	protein_coding	0.439885	0.445295	0.265869	0.520492	0.679833	0.696286
ENSG00000099849.14_3	RASSF7	chr11:560404-564021	+	protein_coding	2.69299	2.1896	1.92694	1.52556	1.59457	1.6385
ENSG00000099860.8_3	GADD45B	chr19:2476120-2478257	+	protein_coding	5.92279	5.33328	5.38205	6.11065	4.61582	4.27671
ENSG00000099864.17_3	PALM	chr19:708939-748329	+	protein_coding	1.07061	2.0377	1.56715	4.22599	4.79518	4.54535
ENSG00000099875.14_3	MKNK2	chr19:2037464-2051243	-	protein_coding	16.7559	13.5439	13.4185	11.4273	10.4446	10.2618
ENSG00000099899.14_4	TRMT2A	chr22:20099389-20104915	-	protein_coding	2.6539	2.97135	2.20827	2.16653	2.97807	2.84393
ENSG00000099901.16_3	RANBP1	chr22:20103461-20114880	+	protein_coding	29.1794	27.6211	25.8231	22.4319	23.8618	23.4932
ENSG00000099904.15_2	ZDHHC8	chr22:20116979-20135530	+	protein_coding	2.28486	2.55978	2.6768	2.19418	2.03597	2.48658
ENSG00000099910.16_3	KLHL22	chr22:20795806-20850170	-	protein_coding	0.853746	0.593707	0.651914	0.401381	0.405707	0.496685
ENSG00000099917.17_3	MED15	chr22:20850200-20941919	+	protein_coding	4.46273	4.63417	4.84505	3.14899	3.6034	3.35888
ENSG00000099940.11_3	SNAP29	chr22:21213271-21245506	+	protein_coding	7.1442	6.76715	6.33994	5.64041	4.707	5.09862
ENSG00000099942.12_2	CRKL	chr22:21271714-21308037	+	protein_coding	14.5375	14.6204	13.6515	20.9199	21.715	23.5004
ENSG00000099949.18_3	LZTR1	chr22:21333751-21353327	+	protein_coding	1.1694	1.00165	1.15087	1.09242	1.04883	2.19005
ENSG00000099956.18_4	SMARCB1	chr22:24129150-24176703	+	protein_coding	15.1674	13.2442	15.9326	12.2464	12.2266	12.8598
ENSG00000099958.14_2	DERL3	chr22:24176690-24181315	-	protein_coding	1.65772	1.5741	1.46268	0.452172	0.382688	0.355613
ENSG00000099968.17_2	BCL2L13	chr22:18111621-18213621	+	protein_coding	5.29657	5.23769	4.87134	4.67152	6.4047	5.88396
ENSG00000099974.7_3	DDTL	chr22:24309089-24314721	+	protein_coding	5.79936	5.55984	4.86182	4.20928	4.79022	4.37981
ENSG00000099977.13_3	DDT	chr22:24313554-24322660	-	protein_coding	7.73311	13.7117	8.46248	12.3944	14.6301	13.1605
ENSG00000099991.17_4	CABIN1	chr22:24407642-24574596	+	protein_coding	3.94529	3.65574	3.49989	4.78597	4.39576	4.60148
ENSG00000099992.15_3	TBC1D10A	chr22:30687979-30723035	-	protein_coding	1.20871	1.32781	1.18881	2.23748	2.85904	2.52734
ENSG00000099994.10_2	SUSD2	chr22:24577227-24585078	+	protein_coding	0.185882	0.294256	0.171746	0.942404	1.37929	1.03015
ENSG00000099995.18_3	SF3A1	chr22:30727977-30752936	-	protein_coding	18.8589	19.879	19.2419	18.7352	19.8713	16.5587
ENSG00000100003.17_3	SEC14L2	chr22:30792846-30821305	+	protein_coding	0.991366	0.958201	1.17716	1.05904	0.886051	1.14642
ENSG00000100014.19_4	SPECC1L	chr22:24666785-24813708	+	protein_coding	4.15405	1.8894	2.31255	3.2475	2.26838	3.02155
ENSG00000100023.18_3	PPIL2	chr22:22020298-22054304	+	protein_coding	1.62413	1.86672	1.9363	1.48054	1.32562	1.21228
ENSG00000100027.14_2	YPEL1	chr22:22051833-22090123	-	protein_coding	1.02318	0.822969	1.09576	0.162709	0.0994375	0.212233
ENSG00000100028.11_3	SNRPD3	chr22:24951471-25005947	+	protein_coding	33.4889	38.0548	33.1383	37.3859	38.9271	38.2922
ENSG00000100029.17_2	PES1	chr22:30972612-31003070	-	protein_coding	15.4006	15.0499	16.4806	11.1562	12.4226	10.7357
ENSG00000100030.14_2	MAPK1	chr22:22108789-22221970	-	protein_coding	8.57869	8.21501	8.74185	7.457	7.68583	6.78834
ENSG00000100031.18_4	GGT1	chr22:24979718-25024972	+	protein_coding	3.19859	3.55107	2.93989	3.51858	3.07177	2.92528
ENSG00000100034.13_3	PPM1F	chr22:22273793-22307209	-	protein_coding	3.96164	3.82973	4.00214	1.95976	2.12804	2.33131
ENSG00000100036.12_3	SLC35E4	chr22:31031639-31065003	+	protein_coding	1.27148	1.05242	1.17266	1.55647	1.84498	1.75675
ENSG00000100038.19_3	TOP3B	chr22:22311397-22337213	-	protein_coding	1.71836	1.9672	1.78181	0.897317	1.02929	1.71379
ENSG00000100055.20_3	CYTH4	chr22:37678068-37711386	+	protein_coding	0.0619697	0.0344654	0.034047	0.409518	0.771837	0.603799
ENSG00000100056.11_3	ESS2	chr22:19117792-19132197	-	protein_coding	1.7898	1.8715	2.23828	2.61018	2.71863	2.62284
ENSG00000100060.17_2	MFNG	chr22:37865101-37882439	-	protein_coding	0.405451	0.505585	0.552055	0.737626	0.604575	0.933513
ENSG00000100065.14_3	CARD10	chr22:37886400-37915549	-	protein_coding	11.2532	10.4203	10.1873	8.55722	9.4413	8.57421
ENSG00000100068.11_3	LRP5L	chr22:25747385-25801344	-	protein_coding	0.894167	0.813607	0.788322	0.774792	0.698893	1.02236
ENSG00000100075.9_2	SLC25A1	chr22:19163088-19166343	-	protein_coding	19.9019	24.7523	19.4768	20.7652	21.87	17.4145
ENSG00000100078.3_2	PLA2G3	chr22:31530795-31536593	-	protein_coding	0.072865	0.106489	0.020159	0.656756	0.527397	0.646238
ENSG00000100083.18_3	GGA1	chr22:38004482-38029571	+	protein_coding	2.92632	2.20802	2.92119	1.55535	1.78632	2.94395
ENSG00000100084.14_3	HIRA	chr22:19318221-19434973	-	protein_coding	6.55453	6.98246	6.28988	6.79782	6.50735	7.05508
ENSG00000100092.20_3	SH3BP1	chr22:38030661-38062939	+	protein_coding	1.29254	1.02846	1.19805	1.45594	4.31762	1.42679
ENSG00000100097.11_2	LGALS1	chr22:38071615-38075813	+	protein_coding	90.1801	100.773	108.08	107.907	113.629	98.2504
ENSG00000100099.20_2	HPS4	chr22:26839389-26879803	-	protein_coding	1.78101	1.67339	1.56673	1.39291	1.13742	1.50081
ENSG00000100100.12_3	PIK3IP1	chr22:31677579-31688520	-	protein_coding	3.29458	2.83131	2.68868	2.8912	2.48441	3.20465
ENSG00000100104.13_3	SRRD	chr22:26879843-26890624	+	protein_coding	4.02625	4.15735	4.10542	4.64963	5.40572	4.59293
ENSG00000100105.17_3	PATZ1	chr22:31721790-31742218	-	protein_coding	4.69818	4.38314	4.41487	4.28848	4.41039	4.37224
ENSG00000100106.19_4	TRIOBP	chr22:38093011-38172563	+	protein_coding	5.68946	4.72727	4.11291	3.10203	2.69296	3.67069
ENSG00000100109.16_3	TFIP11	chr22:26887191-26908471	-	protein_coding	4.48193	3.55704	3.58196	4.70314	5.2271	4.87776
ENSG00000100116.16_3	GCAT	chr22:38203912-38213183	+	protein_coding	4.69781	3.94116	2.56085	1.79711	2.17848	2.48839
ENSG00000100124.14_3	ANKRD54	chr22:38226862-38245334	-	protein_coding	4.10093	4.11106	4.25151	5.63098	5.47623	5.09191
ENSG00000100129.17_4	EIF3L	chr22:38244875-38285414	+	protein_coding	58.515	58.7558	54.816	37.0507	41.1364	34.3
ENSG00000100138.13_2	SNU13	chr22:42069934-42086508	-	protein_coding	25.6237	14.3427	15.261	26.6138	24.7524	23.4709
ENSG00000100139.13_3	MICALL1	chr22:38301664-38338829	+	protein_coding	3.4907	3.3359	3.02097	4.30756	3.26259	3.35969
ENSG00000100142.14_3	POLR2F	chr22:38348614-38437922	+	protein_coding	4.40785	4.09102	4.07329	5.4642	5.75416	5.43714
ENSG00000100147.13_2	CCDC134	chr22:42196683-42222303	+	protein_coding	1.60379	1.14003	1.68046	3.07464	2.64593	3.82068
ENSG00000100150.16_3	DEPDC5	chr22:32149937-32303020	+	protein_coding	1.13422	1.10716	1.09029	0.766849	0.702381	0.659166
ENSG00000100151.15_2	PICK1	chr22:38452318-38471708	+	protein_coding	2.91235	2.6877	2.5536	1.9791	1.50974	1.76807
ENSG00000100154.14_2	TTC28	chr22:28374002-29075853	-	protein_coding	2.28322	2.17711	2.05061	1.61229	1.15131	1.70091
ENSG00000100162.14_2	CENPM	chr22:42334725-42343168	-	protein_coding	5.24775	5.93684	4.73029	4.89767	4.55216	4.56042
ENSG00000100167.19_2	SEPT3	chr22:42372276-42394225	+	protein_coding	3.88883	3.00404	3.83586	9.61967	7.96769	8.9088
ENSG00000100196.10_2	KDELR3	chr22:38864067-38879452	+	protein_coding	19.5449	17.6308	17.6119	20.4192	19.147	18.1109
ENSG00000100201.20_2	DDX17	chr22:38879445-38903665	-	protein_coding	55.6267	58.5992	56.7884	43.3762	43.0447	40.1199
ENSG00000100207.18_4	TCF20	chr22:42556019-42739622	-	protein_coding	3.64586	2.98431	3.16989	4.6791	4.72127	4.70779
ENSG00000100209.9_2	HSCB	chr22:29138019-29153503	+	protein_coding	5.83934	5.53579	5.32371	5.07624	4.94261	4.81522
ENSG00000100211.10_2	CBY1	chr22:39052641-39069859	+	protein_coding	5.44114	5.62794	4.94881	2.59438	2.43042	2.75302
ENSG00000100216.5_2	TOMM22	chr22:39077953-39081426	+	protein_coding	26.9828	29.2537	30.8497	33.2577	35.9099	30.0508
ENSG00000100219.16_4	XBP1	chr22:29190543-29196585	-	protein_coding	52.3402	51.557	36.9139	22.4304	27.6347	26.4274
ENSG00000100220.11_2	RTCB	chr22:32783569-32808242	-	protein_coding	27.7773	26.7111	27.1408	31.9412	35.1181	29.8102
ENSG00000100221.10_3	JOSD1	chr22:39081548-39097561	-	protein_coding	24.3451	24.0264	26.9373	21.0295	20.1103	18.5868
ENSG00000100225.17_2	FBXO7	chr22:32870663-32894816	+	protein_coding	8.55414	8.46526	7.94611	9.75431	10.7108	11.0737
ENSG00000100226.15_3	GTPBP1	chr22:39101728-39134304	+	protein_coding	3.59972	3.34387	3.77228	2.35336	2.17688	2.9303
ENSG00000100227.17_2	POLDIP3	chr22:42979727-43010968	-	protein_coding	8.99538	9.54997	9.14962	11.7992	17.2359	11.4902
ENSG00000100234.11_2	TIMP3	chr22:33197687-33259030	+	protein_coding	6.67138	5.0341	6.24702	49.2228	50.0583	45.1591
ENSG00000100239.15_3	PPP6R2	chr22:50781733-50883519	+	protein_coding	5.42454	5.48397	5.56588	3.69147	3.37283	3.87812
ENSG00000100241.20_3	SBF1	chr22:50883429-50913453	-	protein_coding	5.6263	6.09069	5.84135	8.6957	8.02125	7.75473
ENSG00000100242.15_3	SUN2	chr22:39130730-39190148	-	protein_coding	3.89165	4.49118	2.86011	7.41789	8.21576	7.47904
ENSG00000100243.20_3	CYB5R3	chr22:43013846-43045574	-	protein_coding	5.79042	6.16082	5.85422	5.15538	6.09208	4.43021
ENSG00000100246.12_3	DNAL4	chr22:39174513-39190203	-	protein_coding	1.53669	1.98355	2.21225	1.20911	1.47502	1.12203
ENSG00000100258.17_3	LMF2	chr22:50941378-50946120	-	protein_coding	7.43473	7.23903	6.43518	4.01542	3.26289	4.142
ENSG00000100263.13_3	RHBDD3	chr22:29655841-29664198	-	protein_coding	2.44429	2.27599	2.29553	3.27644	3.64495	4.29961
ENSG00000100266.18_3	PACSIN2	chr22:43231418-43411151	-	protein_coding	12.7131	12.3547	12.9239	18.2822	18.5432	17.3805
ENSG00000100280.16_2	AP1B1	chr22:29723669-29819168	-	protein_coding	6.84837	6.96551	6.49081	5.55492	4.96423	5.48896
ENSG00000100281.13_3	HMGXB4	chr22:35653445-35691800	+	protein_coding	8.86979	8.63906	8.70821	5.77982	5.2855	6.40125
ENSG00000100284.20_3	TOM1	chr22:35695268-35743987	+	protein_coding	1.98453	1.87114	2.00858	2.12437	2.50493	2.26411
ENSG00000100285.9_2	NEFH	chr22:29876219-29887379	+	protein_coding	1.98619	1.99275	1.43871	4.94865	4.56653	4.33977
ENSG00000100288.19_3	CHKB	chr22:51017378-51039884	-	protein_coding	2.12066	2.52702	1.97097	1.24623	1.19802	1.91426
ENSG00000100290.2_2	BIK	chr22:43506754-43525718	+	protein_coding	8.26939	8.05735	7.66109	9.37925	9.8319	7.83813
ENSG00000100292.16_2	HMOX1	chr22:35776354-35790207	+	protein_coding	3.20621	3.77733	3.56835	8.9306	10.5652	8.43831
ENSG00000100294.12_2	MCAT	chr22:43528212-43539400	-	protein_coding	5.02495	4.7769	4.46218	4.46379	5.25917	4.34276
ENSG00000100296.13_3	THOC5	chr22:29901868-29951205	-	protein_coding	5.0873	5.15116	5.08406	5.43844	5.43973	5.63735
ENSG00000100297.15_3	MCM5	chr22:35796056-35821423	+	protein_coding	19.002	19.9047	17.2336	7.47489	6.90053	6.27668
ENSG00000100299.17_2	ARSA	chr22:51061182-51066601	-	protein_coding	1.54066	1.37577	1.21899	2.3432	2.0921	2.83258
ENSG00000100300.17_2	TSPO	chr22:43547520-43559248	+	protein_coding	21.5296	25.5484	23.4698	17.4577	19.8942	16.5527
ENSG00000100302.6_2	RASD2	chr22:35936915-35950048	+	protein_coding	0.401082	0.330543	0.376082	2.27559	2.0463	2.0834
ENSG00000100304.12_2	TTLL12	chr22:43562628-43583139	-	protein_coding	10.5821	10.2741	11.8809	7.54279	9.42107	7.67848
ENSG00000100307.12_3	CBX7	chr22:39516172-39548679	-	protein_coding	1.37531	1.53121	1.5452	1.22519	1.08786	1.50155
ENSG00000100311.16_2	PDGFB	chr22:39619364-39640756	-	protein_coding	4.86086	5.73529	6.02693	5.95318	6.85004	6.50744
ENSG00000100316.15_2	RPL3	chr22:39708887-39716394	-	protein_coding	171.923	185.379	180.235	72.6485	94.5349	87.8463
ENSG00000100319.12_2	ZMAT5	chr22:30126945-30163000	-	protein_coding	1.57956	1.52306	1.90706	3.09455	3.64365	2.96223
ENSG00000100320.22_3	RBFOX2	chr22:36134783-36424473	-	protein_coding	17.7367	15.6636	17.9504	10.4603	9.33486	10.5721
ENSG00000100321.14_3	SYNGR1	chr22:39745930-39781593	+	protein_coding	0.715001	0.538519	0.599901	1.62148	1.62785	1.81507
ENSG00000100324.13_2	TAB1	chr22:39795746-39833065	+	protein_coding	4.15681	3.89254	4.08516	2.8018	2.60364	3.00428
ENSG00000100325.14_3	ASCC2	chr22:30184597-30234293	-	protein_coding	5.45223	4.81061	5.44592	4.29739	3.72177	4.09143
ENSG00000100330.15_3	MTMR3	chr22:30279144-30426855	+	protein_coding	2.76119	2.7523	2.83565	2.74916	2.97671	3.24581
ENSG00000100335.13_3	MIEF1	chr22:39895437-39914137	+	protein_coding	5.1948	5.68157	8.68897	8.58665	7.49362	6.16437
ENSG00000100342.20_2	APOL1	chr22:36649056-36663576	+	protein_coding	2.07369	3.91592	2.94941	2.00151	2.5908	2.03432
ENSG00000100344.10_3	PNPLA3	chr22:44319619-44360368	+	protein_coding	1.82311	1.62052	1.93872	1.97041	1.74926	2.59063
ENSG00000100345.20_2	MYH9	chr22:36677327-36784063	-	protein_coding	67.163	64.8353	61.4451	31.1543	26.8053	44.1422
ENSG00000100347.14_3	SAMM50	chr22:44351301-44406411	+	protein_coding	6.30244	6.65363	6.37461	6.39497	6.35516	5.74474
ENSG00000100348.9_2	TXN2	chr22:36863083-36878077	-	protein_coding	13.0447	13.0245	11.8381	11.3853	11.8848	10.8207
ENSG00000100350.14_3	FOXRED2	chr22:36883237-36903148	-	protein_coding	7.98727	6.3469	6.62443	5.06018	5.55652	5.97625
ENSG00000100353.17_2	EIF3D	chr22:36906897-36925483	-	protein_coding	40.8699	42.2213	41.0451	23.5459	21.4767	20.3106
ENSG00000100354.20_4	TNRC6B	chr22:40440821-40731812	+	protein_coding	3.08218	2.87384	3.24671	3.35262	2.60643	3.48953
ENSG00000100359.20_3	SGSM3	chr22:40766595-40806293	+	protein_coding	3.82617	4.43095	3.86076	3.55493	3.66651	3.52176
ENSG00000100360.14_3	IFT27	chr22:37154246-37172300	-	protein_coding	0.82404	0.749396	0.834671	0.845591	0.865824	0.86727
ENSG00000100364.18_3	KIAA0930	chr22:45586219-45636650	-	protein_coding	9.81943	10.5737	9.77532	8.36864	10.5585	9.95656
ENSG00000100372.14_3	SLC25A17	chr22:41165634-41215403	-	protein_coding	5.55424	6.37906	6.02256	5.09078	4.92445	4.78091
ENSG00000100376.11_2	FAM118A	chr22:45704849-45737836	+	protein_coding	3.26704	2.90601	2.80714	4.80991	4.98868	5.58254
ENSG00000100379.17_3	KCTD17	chr22:37447776-37459430	+	protein_coding	1.31067	0.902224	1.27069	3.54361	4.42226	4.08225
ENSG00000100380.13_3	ST13	chr22:41220539-41253026	-	protein_coding	69.0969	62.6779	61.3111	57.7598	59.6844	55.5174
ENSG00000100387.8_2	RBX1	chr22:41347351-41369313	+	protein_coding	10.0403	9.13714	9.37069	12.1865	11.7851	10.8243
ENSG00000100393.12_3	EP300	chr22:41487790-41576083	+	protein_coding	6.71151	6.73801	6.79984	7.13899	6.40629	7.27184
ENSG00000100395.14_2	L3MBTL2	chr22:41601209-41627275	+	protein_coding	2.74953	2.30891	2.33664	1.96111	2.10044	2.07595
ENSG00000100401.19_3	RANGAP1	chr22:41641615-41682255	-	protein_coding	25.6821	28.1118	26.8651	27.8487	29.9478	27.4293
ENSG00000100403.11_2	ZC3H7B	chr22:41697526-41756151	+	protein_coding	9.52697	10.5156	10.7341	4.76346	5.0498	4.55248
ENSG00000100410.7_2	PHF5A	chr22:41855721-41864729	-	protein_coding	38.8065	44.9255	41.9253	45.3145	50.5813	42
ENSG00000100412.15_2	ACO2	chr22:41865129-41924993	+	protein_coding	10.8104	11.9861	11.255	7.65968	7.0063	7.03042
ENSG00000100413.16_2	POLR3H	chr22:41921808-41940610	-	protein_coding	2.42918	3.04777	3.21708	3.04421	3.31275	3.16484
ENSG00000100416.12_2	TRMU	chr22:46726772-46753237	+	protein_coding	3.19476	3.44718	3.21017	4.29788	4.59094	4.62485
ENSG00000100417.11_2	PMM1	chr22:41972898-41985894	-	protein_coding	5.04015	4.40963	4.70474	2.83856	2.11604	2.84937
ENSG00000100418.7_2	DESI1	chr22:41994032-42017100	-	protein_coding	11.0338	10.5474	10.902	3.47014	3.23292	3.31785
ENSG00000100422.13_2	CERK	chr22:47080308-47134158	-	protein_coding	11.4212	11.2092	11.6011	8.02583	7.62688	7.47945
ENSG00000100425.18_2	BRD1	chr22:50166931-50221160	-	protein_coding	3.5554	6.25286	3.50906	1.60836	3.05907	3.31222
ENSG00000100426.6_3	ZBED4	chr22:50247490-50283726	+	protein_coding	6.03247	6.20194	5.81765	6.36896	6.18681	6.68132
ENSG00000100429.17_3	HDAC10	chr22:50683612-50689834	-	protein_coding	1.38582	1.47703	1.29845	0.632741	0.742756	0.878496
ENSG00000100439.10_2	ABHD4	chr14:23067146-23082121	+	protein_coding	5.64494	8.82103	6.12882	14.2373	15.1317	14.1959
ENSG00000100441.9_2	KHNYN	chr14:24898492-24911040	+	protein_coding	5.44228	5.24045	6.2088	4.24509	4.07055	4.63729
ENSG00000100442.10_2	FKBP3	chr14:45584803-45604522	-	protein_coding	41.7368	40.3863	36.5347	29.722	28.7281	21.8571
ENSG00000100445.17_3	SDR39U1	chr14:24908972-24912111	-	protein_coding	3.12676	2.62795	3.01176	2.30049	2.79185	3.17458
ENSG00000100461.17_3	RBM23	chr14:23362415-23388393	-	protein_coding	2.79658	2.45594	2.57091	2.58292	2.82741	2.48036
ENSG00000100462.15_3	PRMT5	chr14:23389720-23398794	-	protein_coding	22.4212	21.5044	22.9134	29.1194	31.6856	26.274
ENSG00000100478.14_4	AP4S1	chr14:31494312-31565656	+	protein_coding	0.604563	0.55191	0.627032	0.694642	0.61758	0.422408
ENSG00000100479.12_2	POLE2	chr14:50110273-50155140	-	protein_coding	6.80333	5.59202	5.95902	4.41022	4.0808	3.51113
ENSG00000100483.13_3	VCPKMT	chr14:50575350-50583318	-	protein_coding	2.20627	2.23035	3.54074	4.08124	3.60198	3.03239
ENSG00000100485.11_2	SOS2	chr14:50583838-50698276	-	protein_coding	6.70541	5.95429	6.0804	4.24644	3.77886	4.29228
ENSG00000100490.9_2	CDKL1	chr14:50796122-50883179	-	protein_coding	0.674986	0.613203	0.46393	0.232379	0.133667	0.288262
ENSG00000100503.23_3	NIN	chr14:51186481-51297839	-	protein_coding	5.49331	3.98807	4.91784	5.6515	3.89605	5.31131
ENSG00000100504.16_2	PYGL	chr14:51324609-51411454	-	protein_coding	31.127	28.5671	26.6848	18.8445	19.3227	19.072
ENSG00000100519.11_3	PSMC6	chr14:53173890-53195305	+	protein_coding	12.8191	11.7931	11.3904	14.9777	16.4973	14.2689
ENSG00000100522.8_2	GNPNAT1	chr14:53241912-53258386	-	protein_coding	13.7519	12.5663	12.5809	14.2337	14.2723	13.1324
ENSG00000100523.14_3	DDHD1	chr14:53503463-53620000	-	protein_coding	1.35222	1.14708	1.46817	1.1003	0.854249	1.19336
ENSG00000100526.19_3	CDKN3	chr14:54863567-54886936	+	protein_coding	8.78813	6.92962	7.03908	6.53615	6.24764	6.94569
ENSG00000100528.11_2	CNIH1	chr14:54890278-54908149	-	protein_coding	12.3971	11.5277	12.5049	10.7313	11.0783	10.5277
ENSG00000100532.11_2	CGRRF1	chr14:54976530-55006027	+	protein_coding	1.59606	1.56346	1.03147	1.9298	2.30461	2.18505
ENSG00000100554.11_3	ATP6V1D	chr14:67761088-67826982	-	protein_coding	8.49817	8.19769	10.6782	9.76938	9.23322	8.78776
ENSG00000100558.8_2	PLEK2	chr14:67853700-67878917	-	protein_coding	28.3539	25.9217	25.7713	18.1417	16.1071	18.0795
ENSG00000100564.8_3	PIGH	chr14:68048672-68067004	-	protein_coding	1.92776	1.98815	2.39761	3.96588	4.85526	4.04848
ENSG00000100567.12_3	PSMA3	chr14:58711549-58738730	+	protein_coding	17.7222	16.5521	15.6929	25.2111	25.9967	22.0616
ENSG00000100568.10_3	VTI1B	chr14:68113792-68141548	-	protein_coding	8.62527	7.95481	8.12756	6.96999	6.54686	6.40613
ENSG00000100575.13_2	TIMM9	chr14:58875212-58894332	-	protein_coding	15.5833	15.7783	15.1204	7.90873	6.52987	6.82771
ENSG00000100577.18_2	GSTZ1	chr14:77787227-77797940	+	protein_coding	0.474031	0.714554	0.569636	0.112067	0.0692446	0.146403
ENSG00000100578.14_4	KIAA0586	chr14:58894103-59018007	+	protein_coding	1.68218	1.4161	1.43425	1.8309	1.34534	1.73665
ENSG00000100580.7_2	TMED8	chr14:77801364-77843452	-	protein_coding	4.68595	3.72196	4.57591	2.36014	2.07352	2.72772
ENSG00000100583.4_2	SAMD15	chr14:77843032-77857840	+	protein_coding	0.643116	0.502494	0.666192	0.132007	0.083597	0.143827
ENSG00000100591.7_3	AHSA1	chr14:77924213-77935817	+	protein_coding	27.8345	23.2093	24.05	34.5817	43.4574	36.072
ENSG00000100592.15_2	DAAM1	chr14:59655364-59838123	+	protein_coding	5.05217	4.17752	4.69978	4.84779	4.36342	4.63193
ENSG00000100596.6_3	SPTLC2	chr14:77972340-78083116	-	protein_coding	5.09211	5.36621	5.20477	5.53087	5.49935	4.75181
ENSG00000100599.15_4	RIN3	chr14:92980118-93155339	+	protein_coding	1.16493	1.19717	0.703915	0.624984	0.50266	0.602683
ENSG00000100600.14_3	LGMN	chr14:93170152-93215047	-	protein_coding	9.36003	9.69596	7.62156	9.28959	7.86719	6.98224
ENSG00000100601.9_3	ALKBH1	chr14:78138747-78174363	-	protein_coding	4.36191	4.35666	4.04474	4.84208	5.04018	5.01532
ENSG00000100603.13_2	SNW1	chr14:78183942-78227550	-	protein_coding	45.5428	41.9531	42.1393	47.7555	44.429	43.1008
ENSG00000100605.16_3	ITPK1	chr14:93403259-93582665	-	protein_coding	4.5459	5.15934	4.86117	6.81929	7.79243	6.05594
ENSG00000100612.13_2	DHRS7	chr14:60610838-60636574	-	protein_coding	9.12835	8.59077	8.56755	12.0588	9.9721	9.17832
ENSG00000100614.17_3	PPM1A	chr14:60712470-60765805	+	protein_coding	4.91337	4.41122	4.79097	3.35588	4.14917	3.42306
ENSG00000100625.8_3	SIX4	chr14:61176246-61191066	-	protein_coding	4.5368	4.47736	4.02134	4.92312	4.48726	5.28721
ENSG00000100629.16_3	CEP128	chr14:80943326-81425861	-	protein_coding	2.65452	2.18154	2.2287	2.57376	2.25364	3.09522
ENSG00000100632.10_2	ERH	chr14:69846840-69865344	-	protein_coding	64.1257	67.2353	75.4357	85.4053	93.6919	85.1899
ENSG00000100644.16_3	HIF1A	chr14:62162231-62214977	+	protein_coding	29.8677	25.1918	25.9928	50.7687	44.6788	46.2456
ENSG00000100647.7_2	SUSD6	chr14:70078313-70181859	+	protein_coding	1.24793	1.49952	1.3678	2.11611	1.78743	1.92404
ENSG00000100650.15_3	SRSF5	chr14:70193617-70238722	+	protein_coding	23.9026	23.0364	21.5754	7.51217	6.89573	10.1072
ENSG00000100664.10_3	EIF5	chr14:103799881-103811362	+	protein_coding	16.0058	11.743	11.4822	13.3084	16.2696	13.3808
ENSG00000100697.14_2	DICER1	chr14:95552565-95624347	-	protein_coding	6.18209	5.2142	4.52258	3.95041	3.65613	3.42373
ENSG00000100711.13_2	ZFYVE21	chr14:104182067-104200005	+	protein_coding	2.58294	2.47156	2.32771	1.79116	1.98186	1.9642
ENSG00000100714.15_3	MTHFD1	chr14:64854749-64930175	+	protein_coding	18.3977	18.3084	18.9593	11.5013	10.214	9.45853
ENSG00000100722.18_2	ZC3H14	chr14:89029253-89093940	+	protein_coding	4.02923	3.82841	3.68126	3.16645	2.69844	3.43199
ENSG00000100726.14_2	TELO2	chr16:1543345-1560458	+	protein_coding	6.38064	6.08342	6.54905	3.02158	3.05363	3.45289
ENSG00000100731.15_3	PCNX1	chr14:71374122-71582099	+	protein_coding	1.93535	2.68031	2.81941	2.84957	2.20368	3.07001
ENSG00000100744.14_2	GSKIP	chr14:96829789-96853625	+	protein_coding	1.76435	4.49855	6.29801	3.66344	3.39504	3.27215
ENSG00000100749.7_3	VRK1	chr14:97263641-97398059	+	protein_coding	15.4642	13.0949	13.2223	12.6257	9.87596	10.7404
ENSG00000100764.13_3	PSMC1	chr14:90722839-90741773	+	protein_coding	19.659	18.726	20.3944	23.4167	25.4032	22.509
ENSG00000100767.15_3	PAPLN	chr14:73704205-73741348	+	protein_coding	1.12235	1.08696	1.12602	0.140282	0.0716694	0.219271
ENSG00000100784.10_3	RPS6KA5	chr14:91314206-91526980	-	protein_coding	1.08257	1.05113	1.05284	1.1706	1.11075	1.06828
ENSG00000100796.17_2	PPP4R3A	chr14:91923955-91976898	-	protein_coding	11.1281	10.2561	9.91577	11.1573	11.1624	11.0261
ENSG00000100802.14_3	C14orf93	chr14:23455117-23479375	-	protein_coding	1.11148	1.04438	1.19593	0.689066	0.572873	0.939595
ENSG00000100804.18_3	PSMB5	chr14:23485752-23504439	-	protein_coding	21.8578	23.4535	18.5181	23.5461	33.1316	30.3989
ENSG00000100811.12_3	YY1	chr14:100704635-100749129	+	protein_coding	22.9138	21.5474	20.6141	17.4149	15.7046	16.5873
ENSG00000100813.14_3	ACIN1	chr14:23527773-23564823	-	protein_coding	16.8389	16.8783	15.9163	15.3879	16.2689	16.7596
ENSG00000100814.17_2	CCNB1IP1	chr14:20779527-20801471	-	protein_coding	12.8685	16.35	14.8368	6.61932	4.85219	7.2117
ENSG00000100815.12_4	TRIP11	chr14:92432335-92507240	-	protein_coding	5.60561	5.05108	4.87545	4.03151	2.18021	4.19624
ENSG00000100823.11_3	APEX1	chr14:20923350-20925931	+	protein_coding	28.4629	37.3144	37.6897	33.5196	30.2368	32.2865
ENSG00000100836.10_3	PABPN1	chr14:23790498-23795394	+	protein_coding	31.1683	34.3759	32.2197	22.3814	29.5434	26.3192
ENSG00000100852.12_3	ARHGAP5	chr14:32545320-32628934	+	protein_coding	4.69479	6.79657	5.70197	16.1773	9.7194	17.8927
ENSG00000100865.14_2	CINP	chr14:102807439-102829253	-	protein_coding	3.04696	2.48738	2.83277	2.01403	2.6859	1.98538
ENSG00000100867.14_3	DHRS2	chr14:24099324-24114848	+	protein_coding	0.305723	0.395207	0.205167	0.559997	0.647807	0.464342
ENSG00000100883.11_3	SRP54	chr14:35451163-35498773	+	protein_coding	18.3981	17.1611	17.3949	17.1542	16.6733	14.819
ENSG00000100888.12_3	CHD8	chr14:21853353-21924285	-	protein_coding	8.04858	6.38856	5.67917	7.9745	7.45449	8.26826
ENSG00000100889.11_2	PCK2	chr14:24563262-24579807	+	protein_coding	13.1121	10.1486	8.92824	2.01504	2.82043	1.74497
ENSG00000100890.15_3	KIAA0391	chr14:35591052-35746820	+	protein_coding	2.87699	2.41086	2.74614	2.67471	2.82375	3.47071
ENSG00000100897.17_3	DCAF11	chr14:24583404-24594451	+	protein_coding	4.00459	3.47642	4.20684	3.3755	3.30654	3.26282
ENSG00000100902.10_3	PSMA6	chr14:35747839-35786699	+	protein_coding	15.4511	13.8967	12.7843	17.5373	20.9336	19.595
ENSG00000100906.10_2	NFKBIA	chr14:35870717-35873955	-	protein_coding	33.5069	33.4598	34.2325	57.48	53.9349	45.6007
ENSG00000100908.13_2	EMC9	chr14:24608168-24610797	-	protein_coding	3.02862	3.50804	2.88692	3.53401	3.75882	3.37682
ENSG00000100911.15_3	PSME2	chr14:24612571-24616779	-	protein_coding	16.4434	18.24	18.2499	14.85	16.5326	13.9753
ENSG00000100916.13_3	BRMS1L	chr14:36295524-36401531	+	protein_coding	2.02372	1.79691	1.84837	2.68007	2.24886	2.75035
ENSG00000100926.14_3	TM9SF1	chr14:24658349-24664893	-	protein_coding	4.57338	2.4916	4.1342	7.39594	5.95802	5.1253
ENSG00000100934.14_3	SEC23A	chr14:39501123-39578850	-	protein_coding	8.77457	8.75711	9.20467	11.0841	10.5136	9.94832
ENSG00000100938.17_2	GMPR2	chr14:24701628-24708448	+	protein_coding	8.01933	7.53941	7.65717	4.23995	4.99952	5.56259
ENSG00000100941.8_2	PNN	chr14:39644387-39652422	+	protein_coding	96.4201	85.026	89.2051	60.7021	44.1135	73.5921
ENSG00000100949.14_2	RABGGTA	chr14:24734744-24740945	-	protein_coding	1.47504	1.83575	1.69432	1.37358	1.22521	1.28412
ENSG00000100979.14_3	PLTP	chr20:44527260-44540794	-	protein_coding	0.708886	0.610499	0.741516	1.33858	1.73227	1.8547
ENSG00000100982.11_2	PCIF1	chr20:44563267-44576662	+	protein_coding	8.4473	8.24191	7.10212	6.27723	7.18717	6.84056
ENSG00000100983.9_2	GSS	chr20:33516233-33543620	-	protein_coding	20.5369	22.202	21.5087	12.8496	11.6478	12.0222
ENSG00000100985.7_2	MMP9	chr20:44637547-44645200	+	protein_coding	0.219304	0.25528	0.257121	0.982337	1.22962	0.889268
ENSG00000100991.11_2	TRPC4AP	chr20:33590207-33680674	-	protein_coding	33.539	34.5192	35.5786	27.451	26.9054	28.0815
ENSG00000100994.11_3	PYGB	chr20:25228705-25278650	+	protein_coding	7.01435	7.31962	6.68458	7.54217	8.3851	7.17433
ENSG00000100997.18_3	ABHD12	chr20:25275379-25371619	-	protein_coding	4.34716	4.57072	4.60027	3.90647	3.70894	3.61587
ENSG00000101000.5_3	PROCR	chr20:33759876-33804043	+	protein_coding	13.0321	11.3298	12.5928	30.4069	29.8279	25.1963
ENSG00000101003.9_2	GINS1	chr20:25388363-25433264	+	protein_coding	11.508	10.3121	11.092	6.99439	6.98552	7.6136
ENSG00000101004.14_3	NINL	chr20:25433341-25566153	-	protein_coding	2.86564	2.86419	3.00135	1.8969	1.1504	2.32015
ENSG00000101019.21_3	UQCC1	chr20:33890369-33999944	-	protein_coding	6.96463	7.04864	5.80324	4.06749	4.92079	5.28009
ENSG00000101040.19_3	ZMYND8	chr20:45837859-45985633	-	protein_coding	7.0063	6.81548	6.26424	11.7274	9.45047	10.6911
ENSG00000101052.12_2	IFT52	chr20:42219571-42275936	+	protein_coding	13.0496	12.6079	13.3511	8.82863	8.46426	8.90842
ENSG00000101057.15_2	MYBL2	chr20:42295659-42345136	+	protein_coding	84.2206	86.5391	75.0505	50.6947	49.7473	44.1478
ENSG00000101076.16_3	HNF4A	chr20:42984340-43063236	+	protein_coding	0.986901	0.779069	1.21199	0.891832	1.56137	1.67018
ENSG00000101079.20_2	NDRG3	chr20:35280169-35374481	-	protein_coding	20.6764	11.7853	16.7358	20.6609	27.8706	26.6274
ENSG00000101084.17_3	C20orf24	chr20:35234137-35240960	+	protein_coding	55.8817	60.1257	65.0617	118.506	117.881	105.397
ENSG00000101096.19_2	NFATC2	chr20:50003494-50179370	-	protein_coding	0.818117	0.907303	0.983698	0.991459	0.710002	1.11479
ENSG00000101098.12_2	RIMS4	chr20:43380449-43438979	-	protein_coding	0.617603	1.02142	0.685789	3.16539	3.92865	2.92904
ENSG00000101104.12_2	PABPC1L	chr20:43538703-43587676	+	protein_coding	3.50651	2.81936	2.39514	1.27449	0.951099	2.69427
ENSG00000101109.11_2	STK4	chr20:43595115-43708600	+	protein_coding	4.09416	11.6769	3.47521	8.54315	7.44949	9.38434
ENSG00000101115.12_2	SALL4	chr20:50398870-50419059	-	protein_coding	1.35666	1.02975	1.14371	0.920352	0.685519	1.64435
ENSG00000101126.15_3	ADNP	chr20:49505456-49547777	-	protein_coding	39.0609	12.873	10.6644	35.4803	10.452	36.7357
ENSG00000101132.9_2	PFDN4	chr20:52824386-52844591	+	protein_coding	59.7243	57.9249	61.2473	83.0835	82.6685	81.5632
ENSG00000101138.11_3	CSTF1	chr20:54967427-54981425	+	protein_coding	16.0442	12.3293	12.4602	11.6825	10.9938	11.432
ENSG00000101146.12_3	RAE1	chr20:55926066-55954267	+	protein_coding	13.8229	12.6382	12.9394	13.5104	14.3353	14.4219
ENSG00000101150.17_3	TPD52L2	chr20:62496581-62522898	+	protein_coding	75.65	72.3928	50.3496	56.3388	54.7761	34.7406
ENSG00000101152.10_2	DNAJC5	chr20:62526535-62567384	+	protein_coding	30.4737	31.5228	32.2651	30.7651	28.0048	30.9654
ENSG00000101158.13_3	NELFCD	chr20:57556263-57570188	+	protein_coding	11.665	12.9157	12.0721	16.5658	17.0041	16.3039
ENSG00000101160.13_2	CTSZ	chr20:57570240-57582302	-	protein_coding	87.0382	83.2243	75.9731	89.8818	85.6242	83.2976
ENSG00000101161.7_2	PRPF6	chr20:62612488-62664453	+	protein_coding	61.1223	55.6095	51.0641	36.7514	39.5017	33.3719
ENSG00000101166.15_2	PRELID3B	chr20:57608200-57617964	-	protein_coding	125.365	113.568	118.214	111.782	109.155	105.096
ENSG00000101181.17_3	MTG2	chr20:60758085-60778624	+	protein_coding	4.54267	5.17475	4.22576	4.31509	4.98327	4.31829
ENSG00000101182.14_3	PSMA7	chr20:60711791-60718496	-	protein_coding	157.654	162.677	159.19	196.594	228.462	196.95
ENSG00000101187.15_2	SLCO4A1	chr20:61273797-61317137	+	protein_coding	24.1701	26.2199	26.6817	67.0813	69.7835	62.4955
ENSG00000101188.4_2	NTSR1	chr20:61340189-61394123	+	protein_coding	2.71006	2.47512	2.68093	5.98965	4.73267	6.38772
ENSG00000101189.6_2	MRGBP	chr20:61427805-61433090	+	protein_coding	19.2986	19.1959	16.622	35.9488	36.9842	34.4898
ENSG00000101190.12_2	TCFL5	chr20:61472467-61493115	-	protein_coding	20.5786	19.6324	19.375	22.6907	21.7779	22.1224
ENSG00000101191.16_3	DIDO1	chr20:61509090-61569304	-	protein_coding	13.0218	12.7742	12.8127	9.02573	8.22847	11.1028
ENSG00000101193.7_2	GID8	chr20:61569471-61579827	+	protein_coding	17.7034	16.9495	16.9228	13.7092	15.4094	13.3452
ENSG00000101194.17_2	SLC17A9	chr20:61583999-61600937	+	protein_coding	5.70996	6.15446	6.81141	6.69823	6.66381	7.18589
ENSG00000101197.12_2	BIRC7	chr20:61867235-61871859	+	protein_coding	5.59913	7.03168	6.16775	5.09792	5.24808	5.65338
ENSG00000101199.12_3	ARFGAP1	chr20:61904137-61921145	+	protein_coding	6.61171	5.16588	5.33143	7.11727	6.66475	7.23904
ENSG00000101210.10_2	EEF1A2	chr20:62119366-62130668	-	protein_coding	79.493	101.646	78.697	166.39	169.705	147.393
ENSG00000101213.6_2	PTK6	chr20:62159354-62168723	-	protein_coding	8.58851	7.57943	8.20391	5.78304	5.02631	7.86648
ENSG00000101216.10_2	GMEB2	chr20:62218955-62258394	-	protein_coding	4.36856	4.17123	4.82695	2.51265	3.11526	3.13979
ENSG00000101220.17_2	C20orf27	chr20:3734155-3749034	-	protein_coding	6.20278	6.79359	6.29157	8.56814	9.49779	7.40651
ENSG00000101224.17_3	CDC25B	chr20:3767419-3786768	+	protein_coding	27.5878	26.7882	16.219	19.3019	28.0392	26.7541
ENSG00000101230.5_2	ISM1	chr20:13202418-13281298	+	protein_coding	1.52443	1.19587	1.52689	1.23636	1.06249	0.8439
ENSG00000101236.16_2	RNF24	chr20:3907956-3996229	-	protein_coding	3.43632	4.0311	3.9622	8.09894	5.65712	5.66518
ENSG00000101246.19_2	ARFRP1	chr20:62329995-62339377	-	protein_coding	1.51266	1.33952	1.14577	1.78193	1.42107	1.71403
ENSG00000101247.17_3	NDUFAF5	chr20:13765596-13802228	+	protein_coding	1.34867	1.34517	1.36541	1.63377	1.81109	1.81789
ENSG00000101255.10_3	TRIB3	chr20:343479-378203	+	protein_coding	30.7766	34.3658	32.9546	18.709	20.8197	16.0647
ENSG00000101265.15_2	RASSF2	chr20:4760669-4804291	-	protein_coding	2.06925	2.46758	2.30887	2.81947	2.70834	2.46384
ENSG00000101266.17_3	CSNK2A1	chr20:454235-524465	-	protein_coding	22.6082	22.2144	22.4667	23.1146	23.4604	20.6738
ENSG00000101276.14_2	SLC52A3	chr20:740724-756658	-	protein_coding	0.356452	0.275536	0.248801	4.40843	6.27435	5.20459
ENSG00000101290.13_3	CDS2	chr20:5107432-5178533	+	protein_coding	4.79479	4.97305	5.35082	4.85767	4.6794	4.67268
ENSG00000101294.16_3	HM13	chr20:30102231-30165726	+	protein_coding	9.69021	8.85313	9.55489	9.4031	8.43107	9.49135
ENSG00000101298.13_3	SNPH	chr20:1246960-1289972	+	protein_coding	0.317741	0.268624	0.421238	2.45557	2.5642	2.83406
ENSG00000101310.14_3	SEC23B	chr20:18488137-18542059	+	protein_coding	20.4023	17.5288	17.0161	15.7202	15.6935	14.8899
ENSG00000101311.15_2	FERMT1	chr20:6055492-6104191	-	protein_coding	4.7593	5.59169	4.5621	2.16771	1.88801	1.90183
ENSG00000101333.16_2	PLCB4	chr20:9049410-9461889	+	protein_coding	1.51418	1.46782	1.42962	1.17682	0.999641	1.14476
ENSG00000101335.9_2	MYL9	chr20:35169887-35179850	+	protein_coding	33.988	32.7734	32.0567	32.5484	29.639	28.7076
ENSG00000101337.15_3	TM9SF4	chr20:30697309-30755061	+	protein_coding	8.86186	8.62947	9.39208	8.76161	7.97851	14.1291
ENSG00000101343.14_2	CRNKL1	chr20:20015012-20036690	-	protein_coding	10.7422	9.42957	9.98949	10.8103	10.003	10.3805
ENSG00000101346.13_3	POFUT1	chr20:30795683-30826470	+	protein_coding	17.2982	17.0335	15.897	13.6541	11.8724	11.5063
ENSG00000101347.8_2	SAMHD1	chr20:35518632-35580246	-	protein_coding	12.558	11.6916	10.5446	22.8878	22.2741	19.865
ENSG00000101350.7_2	KIF3B	chr20:30865467-30922814	+	protein_coding	19.9208	20.1737	18.4038	23.5746	21.7715	23.4783
ENSG00000101361.16_3	NOP56	chr20:2632791-2639039	+	protein_coding	17.6108	14.9414	15.2518	7.39958	7.01299	8.32993
ENSG00000101363.12_2	MANBAL	chr20:35918041-35945663	+	protein_coding	14.6655	14.0272	25.6866	24.7538	14.8542	14.1506
ENSG00000101365.20_3	IDH3B	chr20:2639041-2644865	-	protein_coding	11.9564	12.29	12.4176	14.0124	15.3624	13.4057
ENSG00000101367.8_2	MAPRE1	chr20:31407699-31438211	+	protein_coding	75.3667	74.7486	75.5649	109.91	113.696	107.144
ENSG00000101384.11_2	JAG1	chr20:10618332-10654755	-	protein_coding	2.44498	2.14289	1.97316	2.70823	2.55455	2.74036
ENSG00000101391.20_3	CDK5RAP1	chr20:31946645-31989367	-	protein_coding	9.45646	8.94067	6.82566	5.1728	4.07437	9.10675
ENSG00000101400.5_2	SNTA1	chr20:31995761-32031698	-	protein_coding	4.52384	4.35781	4.79666	3.46687	2.68989	2.98056
ENSG00000101407.12_2	TTI1	chr20:36611409-36661870	-	protein_coding	8.80647	12.5964	9.51095	9.43448	8.86386	6.4599
ENSG00000101412.12_2	E2F1	chr20:32263489-32274210	-	protein_coding	39.1328	42.6278	39.1194	38.3027	38.9441	37.5039
ENSG00000101413.11_2	RPRD1B	chr20:36661948-36756182	+	protein_coding	3.06603	12.5508	4.05043	9.38094	2.79903	9.14242
ENSG00000101417.11_2	PXMP4	chr20:32290560-32308125	-	protein_coding	1.70801	1.64862	1.57879	1.17152	0.996877	0.956433
ENSG00000101421.3_2	CHMP4B	chr20:32399110-32442172	+	protein_coding	119.546	114.015	103.806	118.054	127.668	110.246
ENSG00000101439.8_3	CST3	chr20:23607343-23619110	-	protein_coding	14.7424	13.1864	12.8077	16.7466	17.0869	16.5068
ENSG00000101441.4_2	CST4	chr20:23666277-23669677	-	protein_coding	0	0	0.247291	1.35972	1.4157	1.405
ENSG00000101442.9_2	ACTR5	chr20:37377085-37401163	+	protein_coding	5.90942	5.3674	5.21009	10.4136	11.7932	10.2403
ENSG00000101444.12_3	AHCY	chr20:32868074-32899608	-	protein_coding	38.0751	36.7121	41.1569	24.9917	26.8555	23.0602
ENSG00000101447.14_2	FAM83D	chr20:37554955-37581749	+	protein_coding	19.835	17.3259	19.5857	29.7375	31.7721	28.0999
ENSG00000101452.14_3	DHX35	chr20:37590942-37668366	+	protein_coding	5.00547	4.28209	4.48158	2.77869	2.44097	1.94939
ENSG00000101457.12_3	DNTTIP1	chr20:44420576-44440066	+	protein_coding	32.8697	29.8761	31.8318	24.7026	23.3221	24.1782
ENSG00000101460.12_2	MAP1LC3A	chr20:33134658-33148149	+	protein_coding	1.3615	1.82126	1.46914	1.51399	0.869874	1.94078
ENSG00000101464.10_3	PIGU	chr20:33148346-33286594	-	protein_coding	8.6261	8.84853	8.6072	8.31034	6.10065	7.27992
ENSG00000101470.9_2	TNNC2	chr20:44451853-44462384	-	protein_coding	0.519576	1.06826	0.688172	0.412579	0.807694	1.48435
ENSG00000101473.16_2	ACOT8	chr20:44470360-44486045	-	protein_coding	2.7311	2.60915	2.71257	2.50024	2.04036	2.97478
ENSG00000101474.11_3	APMAP	chr20:24943561-24973615	-	protein_coding	29.033	27.8045	27.4922	44.7919	47.4188	39.3189
ENSG00000101489.19_3	CELF4	chr18:34823010-35146000	-	protein_coding	0.651814	0.433612	0.493895	0.740047	0.721963	0.889034
ENSG00000101493.10_3	ZNF516	chr18:74070145-74207146	-	protein_coding	1.28811	1.06266	1.2353	0.961531	0.975334	1.2114
ENSG00000101544.8_2	ADNP2	chr18:77866915-77905406	+	protein_coding	8.48484	9.61696	9.54544	8.50874	9.28749	8.95075
ENSG00000101546.12_3	RBFA	chr18:77794358-77806397	+	protein_coding	6.06204	3.99896	5.16478	2.40907	2.25079	2.47757
ENSG00000101557.14_3	USP14	chr18:158383-214629	+	protein_coding	28.0394	26.7208	26.9784	25.8025	26.1346	23.7903
ENSG00000101558.13_2	VAPA	chr18:9913999-9960018	+	protein_coding	10.2901	8.72665	9.64777	9.56689	8.55175	7.80339
ENSG00000101574.14_3	METTL4	chr18:2537524-2571508	-	protein_coding	5.52604	5.93945	6.38834	3.73654	4.17858	4.45613
ENSG00000101577.9_3	LPIN2	chr18:2916992-3013313	-	protein_coding	17.1998	16.2809	17.5463	19.4661	16.4799	20.4054
ENSG00000101596.14_3	SMCHD1	chr18:2655737-2805015	+	protein_coding	21.9485	19.1993	19.5367	18.2202	15.3988	19.3539
ENSG00000101608.12_3	MYL12A	chr18:3247479-3256234	+	protein_coding	93.3673	96.8222	104.502	67.6014	61.1186	60.0069
ENSG00000101624.10_3	CEP76	chr18:12661832-12702776	-	protein_coding	2.85353	2.56037	2.45302	2.95515	2.90718	3.06555
ENSG00000101639.18_3	CEP192	chr18:12991361-13125051	+	protein_coding	3.59336	3.17603	3.14801	1.6656	1.5175	2.12516
ENSG00000101654.17_3	RNMT	chr18:13726659-13764557	+	protein_coding	4.90119	5.22979	4.58247	4.83668	7.69968	9.5526
ENSG00000101665.8_2	SMAD7	chr18:46446223-46477081	-	protein_coding	6.37535	7.35468	6.90468	8.59219	9.06711	8.76096
ENSG00000101680.14_2	LAMA1	chr18:6941743-7117813	-	protein_coding	1.3108	1.23931	1.20543	1.18779	1.14511	1.21
ENSG00000101695.8_3	RNF125	chr18:29598335-29653176	+	protein_coding	1.8643	1.42852	2.13202	2.63391	2.77083	2.35795
ENSG00000101745.16_3	ANKRD12	chr18:9136226-9285983	+	protein_coding	5.2369	5.29539	4.65831	3.85316	2.24584	5.28533
ENSG00000101751.10_3	POLI	chr18:51795774-51847636	+	protein_coding	0.970143	0.915543	0.926344	0.710661	0.665219	0.883988
ENSG00000101752.11_2	MIB1	chr18:19284918-19450918	+	protein_coding	10.2767	9.17641	10.1839	10.0448	7.84798	10.1231
ENSG00000101773.18_3	RBBP8	chr18:20378224-20606451	+	protein_coding	18.5095	16.7102	16.502	13.828	12.4379	13.0368
ENSG00000101782.14_3	RIOK3	chr18:21032787-21066567	+	protein_coding	11.2598	11.5672	10.875	10.5844	10.8651	10.1027
ENSG00000101811.13_2	CSTF2	chrX:100075348-100095921	+	protein_coding	20.8088	24.3907	19.6639	22.5935	22.7811	24.7941
ENSG00000101843.18_2	PSMD10	chrX:107327437-107334848	-	protein_coding	17.3148	16.5792	18.804	19.6026	19.3627	18.8292
ENSG00000101844.17_3	ATG4A	chrX:107334898-107397901	+	protein_coding	2.89276	2.31658	2.57946	9.1366	8.22224	9.75246
ENSG00000101846.6_2	STS	chrX:7137497-7272851	+	protein_coding	6.23871	7.04349	5.36394	15.8161	13.4216	14.2189
ENSG00000101849.15_4	TBL1X	chrX:9431335-9687783	+	protein_coding	22.7221	23.7842	21.2393	30.5052	28.37	27.4239
ENSG00000101856.9_2	PGRMC1	chrX:118370208-118378429	+	protein_coding	76.529	73.4221	80.5603	91.7048	94.9363	87.1704
ENSG00000101868.10_2	POLA1	chrX:24712036-25015103	+	protein_coding	29.8263	27.5631	27.7345	20.8544	16.67	19.4257
ENSG00000101871.14_3	MID1	chrX:10413350-10851773	-	protein_coding	8.29731	6.16927	7.52334	11.6508	10.2962	12.1687
ENSG00000101882.9_2	NKAP	chrX:119054635-119077735	-	protein_coding	6.6687	5.95241	5.64301	5.37796	5.27167	5.12622
ENSG00000101888.11_2	NXT2	chrX:108779010-108787919	+	protein_coding	5.31477	4.71937	6.10456	13.6244	9.21462	12.4874
ENSG00000101901.11_3	ALG13	chrX:110909039-111003877	+	protein_coding	3.67491	3.59522	3.42302	3.33222	3.25395	2.54833
ENSG00000101911.12_3	PRPS2	chrX:12809474-12842341	+	protein_coding	64.1334	61.2547	59.5761	50.1523	49.5363	47.595
ENSG00000101928.12_2	MOSPD1	chrX:134021656-134049297	-	protein_coding	26.3354	26.6703	32.5751	48.3741	50.0273	47.5858
ENSG00000101935.9_3	AMMECR1	chrX:109437414-109683461	-	protein_coding	14.1142	14.2413	14.5588	15.4239	13.5376	15.6017
ENSG00000101940.17_2	WDR13	chrX:48448430-48467255	+	protein_coding	6.00632	5.67803	6.09983	2.45043	2.54608	3.00228
ENSG00000101945.16_2	SUV39H1	chrX:48553945-48567403	+	protein_coding	14.1895	9.19262	14.0288	12.5584	13.6755	6.43951
ENSG00000101955.14_3	SRPX	chrX:38008589-38080177	-	protein_coding	0	0	0.0277318	1.02224	1.25731	1.0892
ENSG00000101966.12_3	XIAP	chrX:122993574-123047829	+	protein_coding	2.16047	2.21505	2.53883	1.66589	1.7485	1.82211
ENSG00000101972.18_3	STAG2	chrX:123094062-123556514	+	protein_coding	38.0376	35.055	47.2974	37.4911	41.085	33.9555
ENSG00000101974.14_2	ATP11C	chrX:138808505-139027435	-	protein_coding	3.69811	9.08436	7.93215	15.2227	12.3045	15.1177
ENSG00000101986.11_2	ABCD1	chrX:152990323-153010216	+	protein_coding	4.48429	4.32512	4.14224	5.99676	5.86915	6.15196
ENSG00000101997.12_2	CCDC22	chrX:49091927-49106987	+	protein_coding	6.98158	7.21929	6.5959	5.8118	5.58313	5.65828
ENSG00000102003.10_3	SYP	chrX:49044257-49056718	-	protein_coding	0.165504	0.198737	0.211458	0.643951	0.57421	0.706813
ENSG00000102007.10_2	PLP2	chrX:49028273-49031588	+	protein_coding	300.1	310.071	331.984	176.304	189.53	165.207
ENSG00000102024.17_3	PLS3	chrX:114795501-114885181	+	protein_coding	119.036	118.432	118.862	156.563	164.643	146.149
ENSG00000102030.15_3	NAA10	chrX:153194695-153200676	-	protein_coding	7.79928	8.12191	6.33507	9.4703	8.91558	8.86828
ENSG00000102034.16_2	ELF4	chrX:129198849-129244691	-	protein_coding	18.1734	18.3459	17.5421	12.3114	11.9337	12.5597
ENSG00000102038.15_3	SMARCA1	chrX:128580478-128657477	-	protein_coding	17.1752	12.2345	12.7099	34.3884	27.0825	31.6223
ENSG00000102048.15_2	ASB9	chrX:15253410-15288589	-	protein_coding	5.7434	6.30753	4.20326	6.52241	7.8195	6.45977
ENSG00000102054.17_3	RBBP7	chrX:16857406-16888537	-	protein_coding	44.2481	39.3854	42.8991	38.6373	35.7226	35.9634
ENSG00000102057.9_3	KCND1	chrX:48818639-48827976	-	protein_coding	2.23934	2.81487	2.56147	4.32927	3.9229	4.80268
ENSG00000102078.15_2	SLC25A14	chrX:129473862-129507335	+	protein_coding	4.79172	4.93992	3.8713	2.35296	2.61252	2.6452
ENSG00000102081.13_3	FMR1	chrX:146993469-147032645	+	protein_coding	6.66966	4.31672	4.55887	3.65529	3.71485	4.52329
ENSG00000102096.9_2	PIM2	chrX:48770459-48776301	-	protein_coding	9.73677	9.81942	10.3868	20.8562	24.6444	18.7459
ENSG00000102098.17_3	SCML2	chrX:18257434-18372847	-	protein_coding	3.64688	4.4987	4.57038	4.21246	4.36926	5.18196
ENSG00000102100.15_3	SLC35A2	chrX:48760457-48769235	-	protein_coding	5.03426	7.35392	4.3708	8.58902	8.14866	8.12878
ENSG00000102103.15_3	PQBP1	chrX:48755195-48760420	+	protein_coding	42.5967	40.6397	41.6037	37.1864	43.2296	37.5754
ENSG00000102119.10_2	EMD	chrX:153607557-153609883	+	protein_coding	18.4226	18.6958	20.7083	21.6742	22.0579	19.6882
ENSG00000102125.15_3	TAZ	chrX:153639854-153650065	+	protein_coding	2.94791	2.81074	2.83229	2.29849	2.51698	2.55561
ENSG00000102144.13_2	PGK1	chrX:77320685-77384793	+	protein_coding	89.1713	95.2119	103.09	122.47	135.419	116.313
ENSG00000102158.19_2	MAGT1	chrX:77081861-77151090	-	protein_coding	15.785	16.0049	14.8963	16.3952	16.3236	14.6966
ENSG00000102172.15_3	SMS	chrX:21958691-22012953	+	protein_coding	216.96	210.947	208.821	194.767	200.271	191.139
ENSG00000102174.8_3	PHEX	chrX:22050559-22269427	+	protein_coding	0.500692	0.52326	0.515554	0.751302	0.760462	0.815525
ENSG00000102178.12_2	UBL4A	chrX:153712056-153715009	-	protein_coding	25.0941	25.0865	23.9851	25.4472	30.2423	24.5934
ENSG00000102181.20_3	CD99L2	chrX:149934810-150067289	-	protein_coding	3.42923	3.47997	3.46708	1.32016	1.14252	1.08039
ENSG00000102189.16_2	EEA1	chr12:93164413-93323107	-	protein_coding	10.7766	9.31402	10.6808	11.9175	6.94871	11.6111
ENSG00000102218.5_2	RP2	chrX:46696375-46741793	+	protein_coding	11.8194	10.8223	11.6134	16.0739	16.7333	16.2036
ENSG00000102221.13_3	JADE3	chrX:46771711-46920641	+	protein_coding	10.6719	10.266	10.6722	14.0867	13.9973	13.4991
ENSG00000102225.15_3	CDK16	chrX:47077259-47089396	+	protein_coding	20.601	21.3367	22.4988	20.5087	23.0559	21.3059
ENSG00000102226.9_2	USP11	chrX:47092089-47107727	+	protein_coding	19.6899	17.9228	18.2928	15.9327	13.7562	14.4565
ENSG00000102241.11_2	HTATSF1	chrX:135579238-135594505	+	protein_coding	41.4047	35.0666	33.4414	53.4447	52.2712	50.7543
ENSG00000102265.11_2	TIMP1	chrX:47441712-47446188	+	protein_coding	60.234	60.2441	61.4763	123.519	128.364	117.676
ENSG00000102287.18_3	GABRE	chrX:151121596-151143152	-	protein_coding	7.0541	6.00372	7.45438	5.46544	3.07556	11.2514
ENSG00000102302.7_2	FGD1	chrX:54471887-54522599	-	protein_coding	16.607	17.3259	15.8529	8.70531	8.60405	9.32239
ENSG00000102309.12_3	PIN4	chrX:71401203-71522776	+	protein_coding	9.62875	7.61417	8.8672	7.06906	6.10994	6.54956
ENSG00000102312.21_4	PORCN	chrX:48367350-48379202	+	protein_coding	5.58003	4.96776	5.78762	5.87835	5.65572	6.47361
ENSG00000102316.16_2	MAGED2	chrX:54834032-54842445	+	protein_coding	46.9274	47.5498	45.0152	73.602	79.6865	69.5502
ENSG00000102317.17_2	RBM3	chrX:48432837-48437454	+	protein_coding	53.5416	52.8197	59.6538	13.4702	13.5972	16.1909
ENSG00000102362.15_2	SYTL4	chrX:99929488-99987110	-	protein_coding	1.8205	1.34148	1.37615	3.24236	2.75922	3.85892
ENSG00000102384.13_2	CENPI	chrX:100353207-100418670	+	protein_coding	6.87001	6.20087	6.61291	7.64511	6.01632	7.3442
ENSG00000102393.9_2	GLA	chrX:100652791-100662913	-	protein_coding	13.6751	16.5423	15.1424	35.7569	40.7897	32.6403
ENSG00000102401.19_3	ARMCX3	chrX:100877787-100882833	+	protein_coding	18.231	6.85528	16.9476	17.4	9.48039	6.51654
ENSG00000102452.15_2	NALCN	chr13:101706128-102068843	-	protein_coding	3.67139	3.70846	3.61246	1.12929	1.01237	1.06736
ENSG00000102471.13_2	NDFIP2	chr13:80055259-80130210	+	protein_coding	7.53024	7.74281	9.498	13.4717	15.3186	14.6575
ENSG00000102531.16_3	FNDC3A	chr13:49550048-49783915	+	protein_coding	22.8735	22.4239	21.9481	26.8775	20.5603	25.2069
ENSG00000102543.14_2	CDADC1	chr13:49822061-49867621	+	protein_coding	3.9178	3.01228	3.68871	5.32919	5.37616	6.55704
ENSG00000102547.18_2	CAB39L	chr13:49882786-50018262	-	protein_coding	2.64979	2.16863	2.30402	2.00841	2.48252	2.18331
[truncated: 10,164 more rows]
