# Supplementary material for: Transcriptome profiling of A549 non-small cell lung cancer cells in response to Trichinella spiralis muscle larvae excretory/secretory products
Source: Front Vet Sci. 2023 Jul 31;10:1208538. doi: 10.3389/fvets.2023.1208538 (PMC10433203; doi:10.3389/fvets.2023.1208538)
Supplement: Supplementary file 3 [file Table_3.XLS]

## Sheet: BP-down
Column "ID" stands for the ID of gene ontology term
Column "Term" stands for the name of gene ontology term
Column "Ontology" stands for the class of ontology
Column "Count" stands for the number of DE genes associated with the term
Column "Size" stands for the number of background population genes associated with the term
Column "numInt" stands for the total number of DE genes
Column "numTotal" stands for the total number of background population genes
Column "p_value" stands for the fisher exact test value of the term
Column "fdr" stands for the false discovery rate of the term, using Benjamini & Hochberg (1995) method
Column "Enrichment_Score" stands for the Enrichment Score value of the term, it equals (-log10(Pvalue))
Column "Fold_Enrichment" stands for the Fold Enrichment value of the term, it equals (Count/Size)/(numInt/numTotal)
Column "GeneRatio" stands for the Gene Ratio value genes associated with the term, it equals (Count/numInt)
Column "Genes" stands for the DE genes associated with the term
ID	Term	Ontology	Count	Size	numInt	numTotal	p_value	fdr	Enrichment_Score	Fold_Enrichment	GeneRatio	Genes
GO:0006260	DNA_replication	Biological Process	43	214	1086	18342	1.15922e-12	5.74391e-09	11.9358	3.39369	0.0395948	ATR//BARD1//BLM//BRCA1//BRIP1//CDT1//CHAF1A//CHAF1B//DONSON//DTD1//DTL//EME1//EXO1//FAM111A//GINS2//ING4//ING5//LIG1//MCM2//MCM3//MCM4//MCM5//MCM6//MRE11//MSH3//NASP//NUCKS1//PCLAF//POLD2//POLD3//POLL//PRIM1//PRIMPOL//RBBP6//RMI1//RMI2//RPAIN//RRM1//RRM2//SUPT16H//TIMELESS//WDHD1//WRN
GO:0008152	metabolic_process	Biological Process	702	10158	1086	18342	1.04832e-10	1.74505e-07	9.97951	1.1672	0.646409	AACS//AARS//ACAA2//ACAD11//ACAD9//ACAT1//ACCS//ACO2//ACOT4//ACSL5//ACSM3//ACY1//ACYP2//ADAMTS16//ADARB1//ADAT2//ADH5//AFG3L2//AGK//AGO4//AGRN//AHCY//AIG1//AIMP1//ALDH16A1//ALDH1L2//ALDH3B1//ALDH5A1//ALDH6A1//ALDH7A1//ALG10B//ALOX5//ANAPC16//ANKRD1//AOX1//APOL6//APTX//ARGLU1//ARL6IP4//ARNTL2//ARSE//ARSG//ARV1//ASF1B//ASNS//ASPH//ASPHD1//ASS1//ATAD2//ATIC//ATP5S//ATR//ATXN2//AXL//B4GALNT2//BACE2//B…
GO:0046483	heterocycle_metabolic_process	Biological Process	385	4933	1086	18342	1.05654e-10	1.74505e-07	9.97611	1.31815	0.354512	AARS//ACAT1//ACOT4//ACSL5//ACSM3//ADARB1//ADAT2//AGO4//AHCY//AIMP1//ALDH1L2//ALDH6A1//ANKRD1//AOX1//APTX//ARGLU1//ARL6IP4//ARNTL2//ASF1B//ATAD2//ATIC//ATP5S//ATR//ATXN2//B4GALNT2//BARD1//BLM//BORCS8-MEF2B//BRCA1//BRCC3//BRD9//BRIP1//BUD13//CAD//CBS//CCDC85B//CCNB1IP1//CDCA7//CDCA7L//CDT1//CEBPG//CHAF1A//CHAF1B//CITED4//CLNS1A//CNOT6L//COMMD6//COQ7//COQ9//CPSF4//CPSF6//CREB3L4//CSGALNACT1//CTPS1//…
GO:0006139	nucleobase-containing_compound_metabolic_process	Biological Process	372	4763	1086	18342	2.56304e-10	3.17496e-07	9.59125	1.3191	0.342541	AARS//ACAT1//ACOT4//ACSL5//ACSM3//ADARB1//ADAT2//AGO4//AHCY//AIMP1//ALDH6A1//ANKRD1//AOX1//APTX//ARGLU1//ARL6IP4//ARNTL2//ASF1B//ATAD2//ATIC//ATP5S//ATR//ATXN2//B4GALNT2//BARD1//BLM//BORCS8-MEF2B//BRCA1//BRCC3//BRD9//BRIP1//BUD13//CAD//CBS//CCDC85B//CCNB1IP1//CDCA7//CDCA7L//CDT1//CEBPG//CHAF1A//CHAF1B//CITED4//CLNS1A//CNOT6L//COMMD6//COQ7//COQ9//CPSF4//CPSF6//CREB3L4//CSGALNACT1//CTPS1//CTPS2//DA…
GO:0006725	cellular_aromatic_compound_metabolic_process	Biological Process	384	4973	1086	18342	4.87755e-10	4.83365e-07	9.3118	1.30416	0.353591	AARS//ACAT1//ACOT4//ACSL5//ACSM3//ADARB1//ADAT2//AGO4//AHCY//AIMP1//ALDH1L2//ALDH6A1//ANKRD1//AOX1//APTX//ARGLU1//ARL6IP4//ARNTL2//ASF1B//ATAD2//ATIC//ATP5S//ATR//ATXN2//B4GALNT2//BARD1//BLM//BORCS8-MEF2B//BRCA1//BRCC3//BRD9//BRIP1//BUD13//CAD//CBS//CCDC85B//CCNB1IP1//CDCA7//CDCA7L//CDT1//CEBPG//CHAF1A//CHAF1B//CITED4//CLNS1A//CNOT6L//COMMD6//COQ7//COQ9//CPSF4//CPSF6//CREB3L4//CSGALNACT1//CTPS1//…
GO:0044237	cellular_metabolic_process	Biological Process	675	9764	1086	18342	5.99905e-10	4.95421e-07	9.22192	1.1676	0.621547	AACS//AARS//ACAA2//ACAD11//ACAD9//ACAT1//ACCS//ACO2//ACOT4//ACSL5//ACSM3//ACY1//ACYP2//ADAMTS16//ADARB1//ADAT2//ADH5//AFG3L2//AGK//AGO4//AGRN//AHCY//AIG1//AIMP1//ALDH1L2//ALDH3B1//ALDH5A1//ALDH6A1//ALDH7A1//ALG10B//ALOX5//ANAPC16//ANKRD1//AOX1//APOL6//APTX//ARGLU1//ARL6IP4//ARNTL2//ARSG//ARV1//ASF1B//ASNS//ASPH//ASPHD1//ASS1//ATAD2//ATIC//ATP5S//ATR//ATXN2//AXL//B4GALNT2//BACE2//BARD1//BCKDHA//BL…
GO:0006520	cellular_amino_acid_metabolic_process	Biological Process	49	324	1086	18342	1.31645e-09	9.31858e-07	8.8806	2.55428	0.0451197	AARS//ACAT1//ACCS//ACY1//AHCY//AIMP1//ALDH5A1//ALDH6A1//ALDH7A1//ASNS//ASS1//BCKDHA//CAD//CBS//CBSL//CRTAP//CTPS1//CTPS2//DARS//ENOSF1//FARSB//GARS//GFPT1//GMPS//GSS//HIBADH//HMGCL//HOGA1//HPDL//IARS//IVD//LARS//MCCC1//MCCC2//MECP2//MTHFD1//MTR//NARS//NIT2//P4HTM//PFAS//PHYKPL//PYCR2//SARS//SHMT2//SRR//STAT5B//WARS2//YARS
GO:0006259	DNA_metabolic_process	Biological Process	93	830	1086	18342	1.73073e-09	1.07197e-06	8.76177	1.89244	0.0856354	APTX//ATR//BARD1//BLM//BRCA1//BRCC3//BRIP1//CBS//CCNB1IP1//CDT1//CHAF1A//CHAF1B//DONSON//DTD1//DTL//DTX3L//EME1//ERCC1//EXO1//EXOSC5//EXOSC6//FAM111A//FANCA//FANCE//FANCI//FANCL//GINS2//GTF2H3//ING4//ING5//LIG1//LONP1//MBD4//MCM2//MCM3//MCM4//MCM5//MCM6//MGMT//MLH1//MLH3//MND1//MRE11//MSH3//MSH5//MTA1//MYBBP1A//NASP//NOP53//NSD2//NSMCE1//NUCKS1//PARP4//PCLAF//PMS1//POLD2//POLD3//POLL//POLR2D//PRI…
GO:0019752	carboxylic_acid_metabolic_process	Biological Process	97	907	1086	18342	8.53384e-09	4.50498e-06	8.06886	1.80626	0.0893186	AACS//AARS//ACAA2//ACAD11//ACAD9//ACAT1//ACCS//ACO2//ACOT4//ACSL5//ACSM3//ACY1//AHCY//AIG1//AIMP1//ALDH1L2//ALDH5A1//ALDH6A1//ALDH7A1//ALOX5//ARV1//ASNS//ASS1//ATIC//BCKDHA//BRCA1//CAD//CBS//CBSL//CRTAP//CRYL1//CSAD//CSGALNACT1//CTPS1//CTPS2//DARS//DECR1//DHFR//DHTKD1//EHHADH//ENOSF1//EPHX2//ETFB//FAAH2//FADS1//FAHD1//FARSB//FGF2//FH//GARS//GFPT1//GMPS//GRHPR//GSS//HIBADH//HLCS//HMGCL//HOGA1//HPD…
GO:0006996	organelle_organization	Biological Process	277	3440	1086	18342	9.09179e-09	4.50498e-06	8.04135	1.36	0.255064	ACAA2//ACAD9//ACOT4//ADGRG6//AFG3L2//AGK//AGO4//AGRN//ALS2CL//ANKLE2//ANKRD1//ANP32B//ANXA8//ARHGEF17//ARMC4//ASF1B//ATAD2//ATL3//ATP5S//ATPAF1//ATXN10//ATXN2//B9D1//BAIAP2L2//BBOF1//BBS1//BBS10//BLM//BLOC1S4//BRCA1//BRCC3//BRD9//BRIP1//C2CD5//C9orf72//CAP2//CAVIN3//CBY1//CCDC113//CCNB1IP1//CDAN1//CDC42BPB//CDK5RAP2//CDT1//CENPH//CENPK//CENPL//CEP192//CEP250//CEP57//CEP68//CEP89//CHAF1A//CHAF1B//…
GO:0006281	DNA_repair	Biological Process	65	522	1086	18342	1.01501e-08	4.57215e-06	7.99353	2.1031	0.0598527	APTX//ATR//BARD1//BLM//BRCA1//BRCC3//BRIP1//CHAF1A//CHAF1B//DTL//DTX3L//EME1//ERCC1//EXO1//FANCA//FANCE//FANCI//FANCL//GINS2//GTF2H3//LIG1//MBD4//MGMT//MLH1//MLH3//MND1//MRE11//MSH3//MSH5//MTA1//NOP53//NSD2//NSMCE1//NUCKS1//PARP4//PCLAF//PMS1//POLD2//POLD3//POLL//POLR2D//PRIMPOL//PRKDC//RAD18//RAD51AP1//RAD51D//RAD54L//RMI2//RPAIN//SLF2//SMC1A//SUPT16H//TIMELESS//TRIP13//UBE2V1//UNG//USP10//USP28…
GO:0022607	cellular_component_assembly	Biological Process	213	2506	1086	18342	1.26945e-08	5.24177e-06	7.89638	1.43554	0.196133	ACAD9//ACAT1//AGO4//ALDH5A1//ANKRD1//ANP32B//ARMC4//ASF1B//ATL3//ATPAF1//ATXN10//ATXN2//B9D1//BAIAP2L2//BBOF1//BBS1//BBS10//BLM//BRIP1//C9orf72//CBY1//CCDC113//CCNB1IP1//CDAN1//CDK5RAP2//CDT1//CENPH//CENPK//CENPL//CEP192//CEP250//CEP57//CEP89//CHAF1A//CHAF1B//CHMP3//CHMP4C//CIRBP//CLDN1//CLGN//CLNS1A//CLTCL1//CLUAP1//CNTRL//COA5//COG4//COL7A1//CPSF6//CYFIP1//DARS//DDIT3//DECR1//DGKD//DHRS4//DLG5/…
GO:0044238	primary_metabolic_process	Biological Process	641	9336	1086	18342	1.83438e-08	6.51261e-06	7.73651	1.15962	0.590239	AACS//AARS//ACAA2//ACAD11//ACAD9//ACAT1//ACCS//ACO2//ACOT4//ACSL5//ACSM3//ACY1//ADAMTS16//ADARB1//ADAT2//ADH5//AFG3L2//AGK//AGO4//AGRN//AHCY//AIG1//AIMP1//ALDH3B1//ALDH5A1//ALDH6A1//ALDH7A1//ALG10B//ALOX5//ANAPC16//ANKRD1//AOX1//APOL6//APTX//ARGLU1//ARL6IP4//ARNTL2//ARV1//ASF1B//ASNS//ASPH//ASPHD1//ASS1//ATAD2//ATIC//ATP5S//ATR//ATXN2//AXL//B4GALNT2//BACE2//BARD1//BCKDHA//BLM//BORCS8-MEF2B//BRCA1…
GO:0006807	nitrogen_compound_metabolic_process	Biological Process	614	8877	1086	18342	1.84009e-08	6.51261e-06	7.73516	1.1682	0.565378	AARS//ACAT1//ACCS//ACOT4//ACSL5//ACSM3//ACY1//ADAMTS16//ADARB1//ADAT2//ADH5//AFG3L2//AGK//AGO4//AGRN//AHCY//AIMP1//ALDH1L2//ALDH3B1//ALDH5A1//ALDH6A1//ALDH7A1//ALG10B//ANAPC16//ANKRD1//AOX1//APOL6//APTX//ARGLU1//ARL6IP4//ARNTL2//ARV1//ASF1B//ASNS//ASPH//ASPHD1//ASS1//ATAD2//ATIC//ATP5S//ATR//ATXN2//AXL//B4GALNT2//BACE2//BARD1//BCKDHA//BLM//BORCS8-MEF2B//BRCA1//BRCC3//BRD9//BRIP1//BUD13//C1RL//C4B…
GO:0055114	oxidation-reduction_process	Biological Process	100	981	1086	18342	5.6467e-08	1.86529e-05	7.24821	1.72166	0.092081	ACAA2//ACAD11//ACAD9//ACAT1//ACO2//ADH5//ALDH16A1//ALDH1L2//ALDH3B1//ALDH5A1//ALDH6A1//ALDH7A1//ALOX5//AOX1//ASPH//ASPHD1//BCKDHA//CBR3//CBS//CHCHD4//CHDH//COQ7//COQ9//CRYL1//DECR1//DHFR//DHODH//DHRS1//DHRS11//DHRS3//DHRS4//DHRS4L2//DHTKD1//DUS3L//EHHADH//ETFB//F8//FADS1//FAHD1//FH//GAA//GFPT1//GRHPR//H6PD//HBE1//HIBADH//HPDL//HSD17B8//IDH2//IMMP2L//IVD//KDSR//LEPR//LOXL4//LYRM7//MAOB//MARC2//ME3…
GO:0006082	organic_acid_metabolic_process	Biological Process	102	1018	1086	18342	9.70009e-08	2.9602e-05	7.01322	1.69227	0.0939227	AACS//AARS//ACAA2//ACAD11//ACAD9//ACAT1//ACCS//ACO2//ACOT4//ACSL5//ACSM3//ACY1//AHCY//AIG1//AIMP1//ALDH1L2//ALDH5A1//ALDH6A1//ALDH7A1//ALOX5//ARV1//ASNS//ASS1//ATIC//BCKDHA//BRCA1//CAD//CBS//CBSL//CRTAP//CRYL1//CSAD//CSGALNACT1//CTPS1//CTPS2//DARS//DECR1//DHFR//DHTKD1//EHHADH//ENOSF1//EPHX2//ETFB//FAAH2//FADS1//FAHD1//FARSB//FGF2//FH//GARS//GFPT1//GMPS//GRHPR//GSS//HIBADH//HLCS//HMGCL//HOGA1//HPD…
GO:0034641	cellular_nitrogen_compound_metabolic_process	Biological Process	590	8555	1086	18342	1.01561e-07	2.9602e-05	6.99327	1.16479	0.543278	AARS//ACAT1//ACOT4//ACSL5//ACSM3//ACY1//ADAMTS16//ADARB1//ADAT2//ADH5//AFG3L2//AGK//AGO4//AHCY//AIMP1//ALDH1L2//ALDH5A1//ALDH6A1//ALDH7A1//ALG10B//ANAPC16//ANKRD1//AOX1//APOL6//APTX//ARGLU1//ARL6IP4//ARNTL2//ASF1B//ASNS//ASPH//ASPHD1//ASS1//ATAD2//ATIC//ATP5S//ATR//ATXN2//AXL//B4GALNT2//BACE2//BARD1//BLM//BORCS8-MEF2B//BRCA1//BRCC3//BRD9//BRIP1//BUD13//C1RL//C4BPB//CAD//CAMKK1//CAMKK2//CASP1//CAS…
GO:0006974	cellular_response_to_DNA_damage_stimulus	Biological Process	83	779	1086	18342	1.26225e-07	3.4747e-05	6.89885	1.79952	0.0764273	APTX//ATR//BARD1//BLM//BRCA1//BRCC3//BRIP1//CDK5RAP3//CHAF1A//CHAF1B//CNOT6L//DDIT3//DONSON//DTL//DTX3L//EME1//ERCC1//EXO1//FANCA//FANCE//FANCI//FANCL//GINS2//GTF2H3//IMMP2L//ING4//LIG1//MACROD1//MAP3K20//MBD4//MGMT//MLH1//MLH3//MND1//MRE11//MSH3//MSH5//MTA1//NOP53//NSD2//NSMCE1//NUCKS1//NUPR1//PARP4//PCLAF//PMS1//POLD2//POLD3//POLL//POLR2D//PPP1R15A//PRIMPOL//PRKDC//RAD18//RAD51AP1//RAD51D//RAD5…
GO:0007049	cell_cycle	Biological Process	125	1343	1086	18342	2.10576e-07	5.35432e-05	6.67659	1.57199	0.115101	AGO4//ANAPC16//ANKLE2//BARD1//BLM//BRCA1//BRCC3//BRIP1//CCNB1IP1//CDK5RAP2//CDK5RAP3//CDK6//CDT1//CEP192//CEP250//CEP57//CEP68//CHAF1A//CHAF1B//CHAMP1//CHMP3//CHMP4C//CLIP1//CLTCL1//CNOT6L//CNTLN//CNTRL//DDIT3//DHFR//DONSON//E2F3//EME1//ERCC1//EXO1//FANCA//FANCI//GINS2//HAUS4//HMG20B//HORMAD1//ING4//IQGAP3//ITGB3BP//KAT2B//KIAA0753//KIF15//KMT5A//KNTC1//LIG1//LRRCC1//MAP3K20//MCM2//MCM3//MCM4//MC…
GO:0044281	small_molecule_metabolic_process	Biological Process	162	1859	1086	18342	2.16118e-07	5.35432e-05	6.66531	1.47181	0.149171	AACS//AARS//ACAA2//ACAD11//ACAD9//ACAT1//ACCS//ACO2//ACOT4//ACSL5//ACSM3//ACY1//ADH5//AHCY//AIG1//AIMP1//ALDH1L2//ALDH3B1//ALDH5A1//ALDH6A1//ALDH7A1//ALOX5//AOX1//ARV1//ASNS//ASS1//ATIC//ATP5S//B4GALNT2//BCKDHA//BRCA1//CAD//CBR3//CBS//CBSL//COQ4//COQ7//COQ9//CRTAP//CRYL1//CSAD//CSGALNACT1//CTPS1//CTPS2//DARS//DCAKD//DECR1//DERA//DHFR//DHODH//DHRS3//DHRS4//DHTKD1//DNPH1//EHHADH//ENOSF1//EPHX2//ESD…
GO:0006541	glutamine_metabolic_process	Biological Process	10	23	1086	18342	2.86112e-07	6.75088e-05	6.54346	7.34326	0.0092081	ALDH5A1//ASNS//CAD//CTPS1//CTPS2//GFPT1//GMPS//MECP2//NIT2//PFAS
GO:1905515	non-motile_cilium_assembly	Biological Process	13	42	1086	18342	5.21313e-07	0.000117414	6.2829	5.2277	0.0119705	BBS1//BBS10//CEP250//CEP89//IFT172//IFT57//IFT74//MKS1//PCM1//POC1A//TMEM107//TMEM17//TMEM216
GO:0060271	cilium_assembly	Biological Process	45	355	1086	18342	1.16917e-06	0.000251881	5.93212	2.14092	0.0414365	ARMC4//ATXN10//B9D1//BBOF1//BBS1//BBS10//CBY1//CCDC113//CDK5RAP2//CEP192//CEP250//CEP57//CEP89//CLUAP1//CNTRL//DNAAF5//FAM161A//HAUS4//HDAC6//IFT172//IFT57//IFT74//IFT80//IFT81//IQCB1//LRRCC1//MKS1//OCRL//ODF2//PARVA//PCM1//POC1A//RILPL1//SDCCAG8//SEPT8//SPAG16//TCTN1//TMEM107//TMEM17//TMEM216//TPGS1//UNC119B//WDR34//WDR5//WDR5B
GO:0044782	cilium_organization	Biological Process	46	372	1086	18342	1.78348e-06	0.000368215	5.74873	2.08849	0.0423573	ARMC4//ATXN10//B9D1//BBOF1//BBS1//BBS10//CBY1//CCDC113//CDK5RAP2//CEP192//CEP250//CEP57//CEP89//CLUAP1//CNTRL//DNAAF5//FAM161A//HAUS4//HDAC6//IFT172//IFT57//IFT74//IFT80//IFT81//IQCB1//LRRCC1//MKS1//MNS1//OCRL//ODF2//PARVA//PCM1//POC1A//RILPL1//SDCCAG8//SEPT8//SPAG16//TCTN1//TMEM107//TMEM17//TMEM216//TPGS1//UNC119B//WDR34//WDR5//WDR5B
GO:0065003	protein-containing_complex_assembly	Biological Process	136	1561	1086	18342	2.38085e-06	0.000471884	5.62327	1.47147	0.12523	ACAD9//ACAT1//AGO4//ALDH5A1//ANP32B//ARMC4//ASF1B//ATL3//ATPAF1//ATXN10//ATXN2//BBS10//BLM//C9orf72//CBY1//CDT1//CENPH//CENPK//CENPL//CEP192//CEP57//CHAF1A//CHAF1B//CHMP3//CIRBP//CLDN1//CLGN//CLNS1A//CLTCL1//COA5//COG4//COL7A1//CPSF6//DARS//DDIT3//DECR1//DGKD//DHRS4//DLG5//DMAC1//DMTN//DNAAF5//DNAJB12//EIF2D//EIF2S3//EIF3A//EIF3D//EIF4B//F8//FANCA//FARSB//FMC1//GBP1//GCFC2//GEMIN5//GRHPR//GTF2H3/…
GO:0043648	dicarboxylic_acid_metabolic_process	Biological Process	20	105	1086	18342	3.0117e-06	0.00057396	5.52119	3.21705	0.0184162	ACOT4//ALDH1L2//ALDH5A1//ASS1//ATIC//DHFR//FH//GRHPR//HOGA1//IDH2//ME3//MTHFD1//MTHFD1L//MTHFD2//NIT2//PCK2//PM20D2//SHMT2//STAT5B//SUCLG2
GO:0006412	translation	Biological Process	47	392	1086	18342	3.26261e-06	0.000598749	5.48644	2.02502	0.0432781	AARS//AIMP1//DARS//EEF1B2//EEF2//EEF2K//EEFSEC//EIF2D//EIF2S3//EIF3A//EIF3D//EIF3L//EIF4A2//EIF4B//FARSB//GARS//GEMIN5//GTF2H3//GTPBP2//IARS//IGF2BP3//LARS//MRPL2//MRPL21//MRPL24//MRPL33//MRPS18B//MRPS25//MRPS27//MRRF//MTERF3//MTFMT//MTIF2//NARS//NDUFA7//OXA1L//PABPC4//RMND1//RPL10A//RPL12//RPL14//RPL3//RPL4//SARS//SRBD1//WARS2//YARS
GO:0006302	double-strand_break_repair	Biological Process	27	174	1086	18342	4.012e-06	0.00070998	5.39664	2.62078	0.0248619	APTX//BARD1//BLM//BRCA1//BRCC3//BRIP1//DTX3L//EME1//ERCC1//EXO1//GINS2//MLH1//MND1//MRE11//MTA1//NSD2//NSMCE1//NUCKS1//POLL//PRKDC//RAD51AP1//RAD51D//RAD54L//TRIP13//WRN//XRCC1//XRCC2
GO:0007131	reciprocal_meiotic_recombination	Biological Process	13	51	1086	18342	5.91143e-06	0.00101004	5.22831	4.30517	0.0119705	BLM//BRIP1//CCNB1IP1//EME1//MLH1//MLH3//MND1//MRE11//MSH3//MSH5//RAD51D//TRIP13//XRCC2
GO:0006298	mismatch_repair	Biological Process	10	31	1086	18342	7.17694e-06	0.00116961	5.14406	5.44823	0.0092081	ERCC1//EXO1//LIG1//MLH1//MLH3//MSH3//MSH5//PMS1//POLD3//XPC
GO:0034622	cellular_protein-containing_complex_assembly	Biological Process	85	888	1086	18342	7.31744e-06	0.00116961	5.13564	1.61668	0.0782689	ACAD9//AGO4//ANP32B//ARMC4//ASF1B//ATPAF1//ATXN2//BBS10//C9orf72//CDT1//CENPH//CENPK//CENPL//CEP192//CHAF1A//CHAF1B//CHMP3//CIRBP//CLNS1A//CLTCL1//COA5//COG4//CPSF6//DMAC1//DNAAF5//DNAJB12//EIF2D//EIF2S3//EIF3A//EIF3D//EIF4B//FMC1//GCFC2//GEMIN5//GTF2H3//HP1BP3//IMMP2L//ITGB3BP//LONP1//LRRCC1//LUC7L3//LYRM7//MCM2//MRTO4//MT-ND5//MTERF3//NASP//NDUFA10//NDUFA7//NDUFAF6//NDUFB1//NDUFB5//NDUFV1//NDUF…
GO:0009083	branched-chain_amino_acid_catabolic_process	Biological Process	8	20	1086	18342	9.77377e-06	0.00145223	5.00994	6.7558	0.00736648	ACAT1//ALDH6A1//BCKDHA//HIBADH//HMGCL//IVD//MCCC1//MCCC2
GO:0051276	chromosome_organization	Biological Process	99	1085	1086	18342	9.87942e-06	0.00145223	5.00527	1.54107	0.0911602	AGO4//ANP32B//ASF1B//ATAD2//BLM//BRCC3//BRD9//BRIP1//CCNB1IP1//CDAN1//CDT1//CENPH//CENPK//CENPL//CEP57//CHAF1A//CHAF1B//CHAMP1//CHMP3//CHMP4C//DTX3L//ELK4//EP400//ERCC1//EXO1//FAM172A//FKBP10//GATAD1//GINS2//HDAC6//HIST1H2AG//HLCS//HMG20B//HORMAD1//HP1BP3//ING4//ING5//ITGB3BP//KAT2B//KMT5A//LAS1L//MCM2//MCM4//MCM6//MECP2//MLH1//MLH3//MRE11//MSH3//MSH5//MTA1//NASP//NCAPG2//NSD2//NUAK2//NUCKS1//NUP…
GO:0045333	cellular_respiration	Biological Process	25	162	1086	18342	9.96488e-06	0.00145223	5.00153	2.6064	0.0230203	ACO2//ALDH5A1//COQ7//COQ9//DHTKD1//FAHD1//FH//IDH2//IMMP2L//LYRM7//ME3//MECP2//MT-ND5//MYBBP1A//NDUFA10//NDUFA7//NDUFB1//NDUFB5//NDUFV1//NDUFV3//OXA1L//SDHAF4//SLC25A13//SLC25A14//SUCLG2
GO:0006730	one-carbon_metabolic_process	Biological Process	9	26	1086	18342	1.07989e-05	0.00150998	4.96662	5.84637	0.00828729	AHCY//ALDH1L2//DHFR//MAT2A//MTHFD1//MTHFD1L//MTHFD2//SHMT2//TYMS
GO:0046395	carboxylic_acid_catabolic_process	Biological Process	34	259	1086	18342	1.09706e-05	0.00150998	4.95977	2.21715	0.0313076	ACAA2//ACAD11//ACAD9//ACAT1//ACOT4//AHCY//AIG1//ALDH1L2//ALDH5A1//ALDH6A1//ALDH7A1//BCKDHA//CBS//CRYL1//DECR1//EHHADH//ENOSF1//ETFB//FGF2//HIBADH//HMGCL//HOGA1//HPDL//IDNK//IVD//MCCC1//MCCC2//MCEE//MECR//PCK2//PHYKPL//PM20D2//SESN2//SORD
GO:0006399	tRNA_metabolic_process	Biological Process	28	195	1086	18342	1.21926e-05	0.00163282	4.9139	2.42516	0.0257827	AARS//ADAT2//AIMP1//DARS//DTD1//DUS3L//EXOSC7//EXOSC8//FARSB//GARS//GTF3C3//IARS//LARS//METTL8//MTFMT//NARS//NAT10//PUS7//PUS7L//QTRT1//SARS//TARBP1//THG1L//TRMT13//TRNT1//TSEN2//WARS2//YARS
GO:0046653	tetrahydrofolate_metabolic_process	Biological Process	8	21	1086	18342	1.49699e-05	0.001952	4.82478	6.4341	0.00736648	ALDH1L2//ATIC//DHFR//MTHFD1//MTHFD1L//MTHFD2//SHMT2//TYMS
GO:0033108	mitochondrial_respiratory_chain_complex_assembly	Biological Process	18	99	1086	18342	1.81431e-05	0.00230511	4.74129	3.07082	0.0165746	ACAD9//COA5//DMAC1//IMMP2L//LYRM7//MT-ND5//NDUFA10//NDUFA7//NDUFAF6//NDUFB1//NDUFB5//NDUFV1//NDUFV3//OXA1L//PET117//SDHAF1//SDHAF4//SMIM20
GO:0006261	DNA-dependent_DNA_replication	Biological Process	21	129	1086	18342	2.20412e-05	0.00273036	4.65676	2.74945	0.019337	BLM//CDT1//DONSON//EME1//GINS2//LIG1//MCM2//MCM3//MCM4//MCM5//MCM6//MSH3//NUCKS1//POLD2//POLD3//PRIM1//PRIMPOL//RPAIN//TIMELESS//WDHD1//WRN
GO:0010389	regulation_of_G2|M_transition_of_mitotic_cell_cycle	Biological Process	24	160	1086	18342	2.4152e-05	0.00291886	4.61705	2.53343	0.0220994	BLM//BRCA1//CDK5RAP2//CDK5RAP3//CDK6//CEP192//CEP250//CEP57//CHMP4C//CNTRL//DONSON//DTL//FANCI//HAUS4//MECP2//MRE11//NAE1//NOP53//ODF2//PCM1//RCC2//RNASEH2B//SDCCAG8//STOX1
GO:0030031	cell_projection_assembly	Biological Process	50	464	1086	18342	3.08247e-05	0.00360226	4.5111	1.81999	0.0460405	ARMC4//ATXN10//B9D1//BBOF1//BBS1//BBS10//CBY1//CCDC113//CDK5RAP2//CEP192//CEP250//CEP57//CEP89//CLUAP1//CNTRL//CYFIP1//DMTN//DNAAF5//FAM161A//FGD1//HAUS4//HDAC6//IFT172//IFT57//IFT74//IFT80//IFT81//IQCB1//LRRCC1//MKS1//OCRL//ODF2//PARVA//PARVB//PCM1//POC1A//RDX//RILPL1//SDCCAG8//SEPT8//SPAG16//TCTN1//TMEM107//TMEM17//TMEM216//TPGS1//UNC119B//WDR34//WDR5//WDR5B
GO:0006310	DNA_recombination	Biological Process	29	216	1086	18342	3.12608e-05	0.00360226	4.505	2.26757	0.0267035	BLM//BRCA1//BRIP1//CCNB1IP1//EME1//ERCC1//EXO1//EXOSC6//GINS2//LIG1//MLH1//MLH3//MND1//MRE11//MSH3//MSH5//NSMCE1//NUCKS1//POLL//PRKDC//RAD51AP1//RAD51D//RAD54L//RPAIN//TRIP13//UNG//WRN//XRCC1//XRCC2
GO:0015980	energy_derivation_by_oxidation_of_organic_compounds	Biological Process	30	228	1086	18342	3.38911e-05	0.0038166	4.46991	2.2223	0.0276243	ACO2//ALDH5A1//COQ7//COQ9//DHTKD1//FAHD1//FH//GAA//GFPT1//IDH2//IMMP2L//LEPR//LYRM7//ME3//MECP2//MT-ND5//MYBBP1A//NDUFA10//NDUFA7//NDUFB1//NDUFB5//NDUFV1//NDUFV3//OXA1L//PHKB//PPP1R3E//SDHAF4//SLC25A13//SLC25A14//SUCLG2
GO:0042558	pteridine-containing_compound_metabolic_process	Biological Process	10	37	1086	18342	4.07131e-05	0.00448296	4.39027	4.56473	0.0092081	ALDH1L2//ATIC//DHFR//MTHFD1//MTHFD1L//MTHFD2//MTR//PM20D2//SHMT2//TYMS
GO:1902749	regulation_of_cell_cycle_G2|M_phase_transition	Biological Process	25	176	1086	18342	4.21284e-05	0.00453796	4.37543	2.39908	0.0230203	BLM//BRCA1//BRCC3//CDK5RAP2//CDK5RAP3//CDK6//CEP192//CEP250//CEP57//CHMP4C//CNTRL//DONSON//DTL//FANCI//HAUS4//MECP2//MRE11//NAE1//NOP53//ODF2//PCM1//RCC2//RNASEH2B//SDCCAG8//STOX1
GO:0000278	mitotic_cell_cycle	Biological Process	67	690	1086	18342	4.43404e-05	0.00467461	4.3532	1.64	0.0616943	ANKLE2//BLM//BRCA1//CDK5RAP2//CDK5RAP3//CDK6//CDT1//CEP192//CEP250//CEP57//CHAMP1//CHMP3//CHMP4C//CLIP1//CLTCL1//CNOT6L//CNTRL//DHFR//DONSON//EME1//FANCI//GINS2//HAUS4//IQGAP3//KIF15//KNTC1//LIG1//MAP3K20//MCM2//MCM3//MCM4//MCM5//MCM6//MECP2//MITD1//MRE11//MYBL2//NAE1//NASP//NOLC1//NOP53//NUP62//ODF2//PCM1//POC1A//PRIM1//PRKDC//RPS6KB1//RRM1//RRM2//SDCCAG8//SEPT8//SKP2//SMC1A//SRSF2//TBCD//TPR//T…
GO:0022613	ribonucleoprotein_complex_biogenesis	Biological Process	47	435	1086	18342	4.94889e-05	0.00510168	4.30549	1.82484	0.0432781	AGO4//ATXN2//C9orf72//CIRBP//CLNS1A//CPSF6//DIS3L//EIF2D//EIF2S3//EIF3A//EIF3D//EIF4B//EMG1//EXOSC5//EXOSC6//EXOSC7//EXOSC8//FBXW9//GCFC2//GEMIN5//LAS1L//LUC7L3//MRM1//MRTO4//MTERF3//NAT10//NLE1//NOB1//NOL3//NOLC1//NOP53//NOP56//POLR2D//PRPF6//PSIP1//RBFA//RBM5//RIOX2//RPL10A//RPL12//RPL14//RPL3//RRP1//SRSF5//TARBP1//UTP20//WDR43
GO:0043170	macromolecule_metabolic_process	Biological Process	532	7934	1086	18342	5.11878e-05	0.00510168	4.29083	1.1325	0.489871	AARS//ACY1//ADAMTS16//ADARB1//ADAT2//ADH5//AFG3L2//AGO4//AGRN//AIMP1//ALG10B//ANAPC16//ANKRD1//APOL6//APTX//ARGLU1//ARL6IP4//ARNTL2//ASF1B//ASPH//ASPHD1//ATAD2//ATR//ATXN2//AXL//B4GALNT2//BACE2//BARD1//BLM//BORCS8-MEF2B//BRCA1//BRCC3//BRD9//BRIP1//BUD13//C1RL//C4BPB//CAD//CAMKK1//CAMKK2//CASP1//CASP4//CBS//CCDC85B//CCNB1IP1//CDC42BPB//CDCA7//CDCA7L//CDK5RAP3//CDK6//CDT1//CEBPG//CHAF1A//CHAF1B//CH…
GO:0070925	organelle_assembly	Biological Process	72	760	1086	18342	5.14801e-05	0.00510168	4.28836	1.60006	0.0662983	ANKRD1//ARMC4//ATXN10//ATXN2//B9D1//BBOF1//BBS1//BBS10//C9orf72//CBY1//CCDC113//CDK5RAP2//CENPH//CENPK//CEP192//CEP250//CEP57//CEP89//CHMP3//CHMP4C//CIRBP//CLUAP1//CNTRL//DNAAF5//FAM161A//HAUS4//HDAC6//HGS//IFT172//IFT57//IFT74//IFT80//IFT81//IQCB1//KIAA0753//LRRCC1//MKS1//MLH1//MRTO4//MTERF3//MYBL2//MYPN//NLE1//NOP53//NUP62//OCRL//ODF2//PARVA//PCM1//POC1A//RILPL1//RPL12//RPL3//SDCCAG8//SEPT8//SP…
GO:0006760	folic_acid-containing_compound_metabolic_process	Biological Process	9	31	1086	18342	5.32622e-05	0.00517479	4.27358	4.9034	0.00828729	ALDH1L2//ATIC//DHFR//MTHFD1//MTHFD1L//MTHFD2//PM20D2//SHMT2//TYMS
GO:0007129	synapsis	Biological Process	11	46	1086	18342	5.83916e-05	0.00547068	4.23365	4.03879	0.0101289	AGO4//BRIP1//CCNB1IP1//HORMAD1//MLH1//MLH3//MRE11//MSH5//SYCE1L//SYCP2//TRIP13
GO:0006396	RNA_processing	Biological Process	81	885	1086	18342	5.85159e-05	0.00547068	4.23273	1.54582	0.0745856	AARS//ADARB1//ADAT2//AGO4//ARL6IP4//BUD13//CLNS1A//CNOT6L//CPSF4//CPSF6//DDX42//DHX35//DIS3L//DUS3L//EMG1//EXOSC5//EXOSC6//EXOSC7//EXOSC8//FBXW9//FIP1L1//GCFC2//GEMIN5//GTF2H3//LAS1L//LSM8//LUC7L3//MBNL3//METTL8//MRM1//MRTO4//MTERF3//MTFMT//NAT10//NCBP3//NOB1//NOL3//NOLC1//NOP56//PABPC4//PAN2//PDCD7//PNN//POLR2D//PPP1R8//PRPF6//PSIP1//PTCD2//PUS7//PUS7L//QTRT1//RAVER1//RAVER2//RBBP6//RBFA//RBFOX2…
GO:0051186	cofactor_metabolic_process	Biological Process	52	503	1086	18342	6.48669e-05	0.00595214	4.18798	1.74603	0.0478821	ACAT1//ACOT4//ACSL5//ACSM3//AHCY//ALDH1L2//ALDH5A1//ATIC//CBR3//COQ4//COQ7//COQ9//DCAKD//DERA//DHFR//DHTKD1//EIF2AK1//FECH//GGCT//GSS//H6PD//HBE1//HLCS//HMGCL//IDH2//MAOB//MAT2A//MCCC1//MCCC2//MCEE//MOCOS//MTHFD1//MTHFD1L//MTHFD2//MTR//NAPRT//NMRK1//PARP10//PARP16//PCK2//PFKL//PM20D2//PNPO//PPCS//PRDX2//SHMT2//SLC25A16//STAT5B//SUCLG2//TYMS//UBIAD1//YJEFN3
GO:0090305	nucleic_acid_phosphodiester_bond_hydrolysis	Biological Process	38	331	1086	18342	7.17899e-05	0.00646762	4.14394	1.93898	0.0349908	AGO4//APTX//CNOT6L//CPSF4//CPSF6//DCP1B//DIS3L//EME1//ERCC1//EXO1//EXOSC5//EXOSC6//EXOSC7//EXOSC8//FIP1L1//GTF2H3//HORMAD1//LACTB2//LAS1L//LRPPRC//MBD4//MOV10//MRE11//NOB1//PAN2//POLD2//POLD3//PPP1R8//RAD51D//REXO5//RNASEH2B//TATDN1//TSEN2//UTP20//WRN//XPA//XRCC1//XRCC2
GO:0009058	biosynthetic_process	Biological Process	343	4883	1086	18342	9.9434e-05	0.00879814	4.00246	1.18638	0.315838	AACS//AARS//ACAA2//ACAT1//ACCS//ACSL5//ACSM3//AGK//AGRN//AHCY//AIMP1//ALDH1L2//ALDH3B1//ALDH7A1//ALG10B//ALOX5//ANKRD1//ARGLU1//ARNTL2//ARV1//ASF1B//ASNS//ASS1//ATAD2//ATIC//ATP5S//ATR//B4GALNT2//BARD1//BLM//BORCS8-MEF2B//BRCA1//BRD9//BRIP1//CAD//CBS//CBSL//CCDC85B//CDCA7//CDCA7L//CDT1//CEBPG//CHAF1A//CHAF1B//CHDH//CITED4//CNOT6L//COMMD6//COQ4//COQ7//COQ9//CPNE7//CPSF4//CREB3L4//CRYL1//CSAD//CSGA…
GO:0007127	meiosis_I	Biological Process	18	113	1086	18342	0.000111162	0.00966325	3.95405	2.69036	0.0165746	AGO4//BLM//BRIP1//CCNB1IP1//EME1//HORMAD1//MLH1//MLH3//MND1//MRE11//MSH3//MSH5//RAD51D//SYCE1L//SYCP2//TDRD9//TRIP13//XRCC2
GO:0006418	tRNA_aminoacylation_for_protein_translation	Biological Process	11	50	1086	18342	0.000131516	0.0109738	3.88102	3.71569	0.0101289	AARS//AIMP1//DARS//FARSB//GARS//IARS//LARS//NARS//SARS//WARS2//YARS
GO:0036297	interstrand_cross-link_repair	Biological Process	11	50	1086	18342	0.000131516	0.0109738	3.88102	3.71569	0.0101289	ATR//EME1//ERCC1//FANCA//FANCE//FANCI//FANCL//NUCKS1//RAD51AP1//RAD51D//XPA
GO:0006417	regulation_of_translation	Biological Process	41	378	1086	18342	0.000134827	0.0109738	3.87022	1.83193	0.0377532	AGO4//ATXN2//CIRBP//CNOT6L//CYFIP1//DHFR//DPH5//DPH7//EEF2//EEFSEC//EIF2AK1//EIF3D//EIF4A2//EIF4B//FAM129A//GEMIN5//GLE1//IGF2BP3//LRPPRC//LSM14B//MAPKAPK5//MRPS27//MTIF2//NANOS3//NCL//NOLC1//POLR2D//PPP1R15A//RBM3//RBMS3//RMND1//RPS6KB1//SESN2//SHMT2//TIA1//TPR//TRAP1//TYMS//UPF3A//USP16//VIM
GO:0006091	generation_of_precursor_metabolites_and_energy	Biological Process	43	403	1086	18342	0.000135367	0.0109738	3.86849	1.80211	0.0395948	AACS//ACAT1//ACO2//ADH5//ALDH5A1//AOX1//ASPH//COQ7//COQ9//DHRS3//DHTKD1//ETFB//FAHD1//FECH//FH//GAA//GFPT1//HMGCL//IDH2//IMMP2L//LEPR//LYRM7//MAOB//ME3//MECP2//MT-ND5//MYBBP1A//NDUFA10//NDUFA7//NDUFB1//NDUFB5//NDUFV1//NDUFV3//OXA1L//PFKL//PHKB//PPP1R3E//SDHAF4//SLC25A13//SLC25A14//SUCLG2//TXNRD2//TXNRD3
GO:0034976	response_to_endoplasmic_reticulum_stress	Biological Process	30	246	1086	18342	0.000138536	0.0109738	3.85844	2.0597	0.0276243	ASNS//CASP4//CDK5RAP3//CREB3L4//DDIT3//DERL3//DNAJB12//EEF2//FAM129A//FICD//GFPT1//HERPUD1//HSP90B1//IGFBP1//MBTPS2//PARP16//PPP1R15A//SESN2//SHC1//STC2//TBL2//TMEM129//TMX4//TRIB3//UBE2G2//UBXN4//UFL1//UFM1//USP13//XBP1
GO:0046655	folic_acid_metabolic_process	Biological Process	7	21	1086	18342	0.000139526	0.0109738	3.85535	5.62983	0.00644567	ALDH1L2//DHFR//MTHFD1//MTHFD1L//MTHFD2//PM20D2//SHMT2
GO:0006552	leucine_catabolic_process	Biological Process	4	6	1086	18342	0.000166498	0.0128906	3.77859	11.2597	0.00368324	HMGCL//IVD//MCCC1//MCCC2
GO:0051321	meiotic_cell_cycle	Biological Process	28	226	1086	18342	0.000174566	0.0131626	3.75804	2.0925	0.0257827	AGO4//BLM//BRIP1//CCNB1IP1//EME1//ERCC1//EXO1//FANCA//HORMAD1//MLH1//MLH3//MND1//MNS1//MRE11//MSH3//MSH5//MYH9//RAD51D//RAD54L//SMC1A//SMC1B//SYCE1L//SYCP2//TDRD9//TRIP13//TUBGCP5//WASHC5//XRCC2
GO:1902115	regulation_of_organelle_assembly	Biological Process	25	192	1086	18342	0.000175324	0.0131626	3.75616	2.19915	0.0230203	ADAMTS16//ATXN2//BRCA1//C9orf72//CDK5RAP2//CEP295//CHMP3//CHMP4C//CNOT6L//EVI5L//KAT2B//LRSAM1//MNS1//NUP62//RAB3GAP2//RDX//SENP6//SMC1A//TBC1D14//TBC1D2//TBC1D3//TCHP//TPR//TSG101//VPS11
GO:0016447	somatic_recombination_of_immunoglobulin_gene_segments	Biological Process	7	22	1086	18342	0.000194228	0.0143642	3.71169	5.37393	0.00644567	ERCC1//EXO1//EXOSC6//MLH1//MSH3//PRKDC//UNG
GO:0009117	nucleotide_metabolic_process	Biological Process	58	607	1086	18342	0.000217758	0.0158675	3.66203	1.61382	0.053407	ACAT1//ACOT4//ACSL5//ACSM3//ATIC//ATP5S//CAD//COQ7//COQ9//CTPS1//CTPS2//DCAKD//DERA//DHODH//DHTKD1//DNPH1//GARS//GMPS//H6PD//HMGCL//IDH2//MBD4//MCCC2//MCEE//MECP2//MOCOS//MT-ND5//MTHFD1//NAPRT//NDUFA10//NDUFA7//NDUFB1//NDUFB5//NDUFV1//NDUFV3//NMRK1//NPR1//NUDT3//PAPSS2//PARP10//PARP16//PCK2//PDE10A//PFAS//PFKL//PPCS//PRTFDC1//RNASEH2B//RRM1//RRM2//SLC25A13//SLC26A2//SUCLG2//SULT1A1//TYMS//UCK2//U…
GO:0043039	tRNA_aminoacylation	Biological Process	11	53	1086	18342	0.000228017	0.0161625	3.64203	3.50537	0.0101289	AARS//AIMP1//DARS//FARSB//GARS//IARS//LARS//NARS//SARS//WARS2//YARS
GO:0006950	response_to_stress	Biological Process	251	3473	1086	18342	0.000228331	0.0161625	3.64144	1.22063	0.231123	AACS//ACAA2//ACAT1//ACO2//ADARB1//ADH5//AGTRAP//AHCY//AIMP1//ALDH3B1//ALOX5//ANKRD1//ANXA3//ANXA8//APTX//ARHGEF19//ASNS//ASS1//ATR//AXL//BARD1//BLM//BLOC1S4//BRCA1//BRCC3//BRIP1//C1RL//C4BPB//CAD//CAMKK2//CARD16//CASP1//CASP4//CBS//CBX5//CDK5RAP3//CEBPG//CHAF1A//CHAF1B//CIRBP//CLDN1//CNOT6L//CREB3L4//CTNNBIP1//CXCL2//DDIT3//DDX60//DEAF1//DERL3//DGKA//DGKD//DHFR//DHODH//DNAJB12//DOCK1//DONSON//DTL…
GO:0009108	coenzyme_biosynthetic_process	Biological Process	23	174	1086	18342	0.000250941	0.0175128	3.60043	2.23252	0.0211786	ACAT1//ACSL5//ATIC//COQ4//COQ7//COQ9//DCAKD//DHFR//DHTKD1//IDH2//MAT2A//MOCOS//MTHFD1//MTHFD1L//NAPRT//NMRK1//PARP10//PARP16//PFKL//PNPO//PPCS//SLC25A16//UBIAD1
GO:0035999	tetrahydrofolate_interconversion	Biological Process	5	12	1086	18342	0.000402178	0.0276776	3.39558	7.03729	0.00460405	MTHFD1//MTHFD1L//MTHFD2//SHMT2//TYMS
GO:0006206	pyrimidine_nucleobase_metabolic_process	Biological Process	6	18	1086	18342	0.000425604	0.0285411	3.37099	5.62983	0.00552486	ALDH6A1//CAD//DHODH//RRM1//TYMS//UCK2
GO:0016445	somatic_diversification_of_immunoglobulins	Biological Process	8	32	1086	18342	0.000432004	0.0285411	3.36451	4.22238	0.00736648	ERCC1//EXO1//EXOSC6//MLH1//MSH3//POLL//PRKDC//UNG
GO:0044818	mitotic_G2|M_transition_checkpoint	Biological Process	8	32	1086	18342	0.000432004	0.0285411	3.36451	4.22238	0.00736648	BLM//BRCA1//CDK5RAP3//DONSON//FANCI//MRE11//NAE1//NOP53
GO:0006303	double-strand_break_repair_via_nonhomologous_end_joining	Biological Process	11	57	1086	18342	0.000444335	0.0286657	3.35229	3.25938	0.0101289	BARD1//BLM//BRCA1//BRCC3//ERCC1//MLH1//MRE11//NSD2//POLL//PRKDC//XRCC1
GO:0097711	ciliary_basal_body-plasma_membrane_docking	Biological Process	15	95	1086	18342	0.000445461	0.0286657	3.35119	2.66676	0.0138122	B9D1//CDK5RAP2//CEP192//CEP250//CEP57//CEP89//CNTRL//HAUS4//IQCB1//MKS1//ODF2//PCM1//SDCCAG8//TCTN1//TMEM216
GO:0000209	protein_polyubiquitination	Biological Process	29	253	1086	18342	0.000505787	0.0321304	3.29603	1.93595	0.0267035	BARD1//BRCA1//DTL//DTX3L//FBXL16//FBXL20//FBXL4//FBXL5//FBXO17//FBXO4//FBXW4//FBXW8//FBXW9//HDAC6//HERC6//LRSAM1//NHLRC3//PELI3//RBBP6//RBCK1//RNF146//RNF165//SKP2//THOP1//TMEM129//UBE2G2//UBE2V1//UBE3B//ZNF738
GO:0022618	ribonucleoprotein_complex_assembly	Biological Process	26	220	1086	18342	0.000608992	0.0381969	3.21539	1.99603	0.0239411	AGO4//ATXN2//C9orf72//CIRBP//CLNS1A//CPSF6//EIF2D//EIF2S3//EIF3A//EIF3D//EIF4B//GCFC2//GEMIN5//LUC7L3//MRTO4//MTERF3//NLE1//NOL3//NOP53//POLR2D//PRPF6//PSIP1//RBM5//RPL12//RPL3//SRSF5
GO:0034475	U4_snRNA_3'-end_processing	Biological Process	4	8	1086	18342	0.000705725	0.042866	3.15136	8.44475	0.00368324	EXOSC5//EXOSC6//EXOSC7//EXOSC8
GO:0046654	tetrahydrofolate_biosynthetic_process	Biological Process	4	8	1086	18342	0.000705725	0.042866	3.15136	8.44475	0.00368324	ATIC//DHFR//MTHFD1//MTHFD1L
GO:0007098	centrosome_cycle	Biological Process	14	89	1086	18342	0.000709388	0.042866	3.14912	2.65678	0.0128913	BRCA1//CDK5RAP2//CEP250//CEP68//CNTLN//HAUS4//KIAA0753//NUP62//ODF2//PCLAF//PCM1//SDCCAG8//TUBGCP5//XRCC2
GO:0072350	tricarboxylic_acid_metabolic_process	Biological Process	9	43	1086	18342	0.000784742	0.0461858	3.10527	3.53501	0.00828729	ACO2//ASS1//DHTKD1//FAHD1//FH//IDH2//ME3//STAT5B//SUCLG2
GO:0033615	mitochondrial_proton-transporting_ATP_synthase_complex_assembly	Biological Process	3	4	1086	18342	0.000791417	0.0461858	3.10159	12.6671	0.00276243	ATPAF1//FMC1//OXA1L
GO:0007130	synaptonemal_complex_assembly	Biological Process	6	20	1086	18342	0.000802362	0.0461858	3.09563	5.06685	0.00552486	AGO4//HORMAD1//MLH3//SYCE1L//SYCP2//TRIP13
GO:0045143	homologous_chromosome_segregation	Biological Process	11	61	1086	18342	0.000810932	0.0461858	3.09102	3.04565	0.0101289	AGO4//BRIP1//CCNB1IP1//HORMAD1//MLH1//MLH3//MRE11//MSH5//SYCE1L//SYCP2//TRIP13
GO:1902750	negative_regulation_of_cell_cycle_G2|M_phase_transition	Biological Process	11	61	1086	18342	0.000810932	0.0461858	3.09102	3.04565	0.0101289	BLM//BRCA1//BRCC3//CDK5RAP3//CHMP4C//DONSON//DTL//FANCI//MRE11//NAE1//NOP53
GO:0006301	postreplication_repair	Biological Process	10	53	1086	18342	0.000962412	0.0541903	3.01664	3.1867	0.0092081	BRCA1//DTL//NSMCE1//PCLAF//POLD2//POLD3//PRIMPOL//RAD18//UBE2V1//USP10
GO:0022900	electron_transport_chain	Biological Process	22	181	1086	18342	0.00106995	0.0589494	2.97064	2.05287	0.0202578	ADH5//ALDH5A1//AOX1//ASPH//COQ7//COQ9//DHRS3//ETFB//IMMP2L//MAOB//MECP2//MT-ND5//MYBBP1A//NDUFA10//NDUFA7//NDUFB1//NDUFB5//NDUFV1//NDUFV3//SLC25A13//TXNRD2//TXNRD3
GO:0043604	amide_biosynthetic_process	Biological Process	78	928	1086	18342	0.00107073	0.0589494	2.97032	1.41959	0.0718232	AARS//ACAT1//ACSL5//AGK//AIMP1//ALG10B//ASNS//ASS1//ATIC//B4GALNT2//CAD//CSGALNACT1//DARS//DERL3//DHFR//DPM3//EEF1B2//EEF2//EEF2K//EEFSEC//EIF2D//EIF2S3//EIF3A//EIF3D//EIF3L//EIF4A2//EIF4B//FARSB//GARS//GEMIN5//GFPT1//GGCT//GSS//GTF2H3//GTPBP2//HHAT//IARS//IGF2BP3//IL18//LARS//MRPL2//MRPL21//MRPL24//MRPL33//MRPS18B//MRPS25//MRPS27//MRRF//MTERF3//MTFMT//MTHFD1//MTHFD1L//MTIF2//NARS//NDUFA7//OGT//O…
GO:0010467	gene_expression	Biological Process	271	3881	1086	18342	0.00108281	0.0589593	2.96545	1.17935	0.24954	AARS//ADARB1//ADAT2//AFG3L2//AGO4//AIMP1//ANKRD1//ARGLU1//ARL6IP4//ARNTL2//ASF1B//ASPH//ATAD2//BACE2//BORCS8-MEF2B//BRCA1//BRD9//BUD13//C1RL//CASP1//CCDC85B//CDCA7//CDCA7L//CEBPG//CHAF1B//CHCHD4//CITED4//CLNS1A//CNOT6L//COMMD6//CPSF4//CPSF6//CREB3L4//DARS//DDIT3//DDX42//DEAF1//DHX35//DIS3L//DUS3L//E2F3//EEF1B2//EEF2//EEF2K//EEFSEC//EID2B//EIF2D//EIF2S3//EIF3A//EIF3D//EIF3L//EIF4A2//EIF4B//ELK4//E…
GO:0030968	endoplasmic_reticulum_unfolded_protein_response	Biological Process	15	104	1086	18342	0.00117242	0.0631449	2.93092	2.43599	0.0138122	ASNS//CDK5RAP3//CREB3L4//DDIT3//DERL3//GFPT1//HERPUD1//HSP90B1//IGFBP1//MBTPS2//PARP16//SHC1//STC2//TBL2//XBP1
GO:0036500	ATF6-mediated_unfolded_protein_response	Biological Process	4	9	1086	18342	0.00121084	0.0633097	2.91691	7.50645	0.00368324	DDIT3//HSP90B1//MBTPS2//XBP1
GO:0016999	antibiotic_metabolic_process	Biological Process	18	137	1086	18342	0.00121505	0.0633097	2.9154	2.21906	0.0165746	ACO2//ADH5//ALDH3B1//ALDH5A1//DHTKD1//ESD//FAHD1//FH//HBE1//IDH2//MAOB//ME3//MTHFD1L//PCK2//PRDX2//STAT5B//SUCLG2//SULT1A1
GO:0010257	NADH_dehydrogenase_complex_assembly	Biological Process	11	64	1086	18342	0.00122659	0.0633097	2.9113	2.90288	0.0101289	ACAD9//DMAC1//MT-ND5//NDUFA10//NDUFA7//NDUFAF6//NDUFB1//NDUFB5//NDUFV1//NDUFV3//OXA1L
GO:0032981	mitochondrial_respiratory_chain_complex_I_assembly	Biological Process	11	64	1086	18342	0.00122659	0.0633097	2.9113	2.90288	0.0101289	ACAD9//DMAC1//MT-ND5//NDUFA10//NDUFA7//NDUFAF6//NDUFB1//NDUFB5//NDUFV1//NDUFV3//OXA1L
GO:0007095	mitotic_G2_DNA_damage_checkpoint	Biological Process	6	22	1086	18342	0.00139497	0.0712586	2.85543	4.60623	0.00552486	BLM//CDK5RAP3//DONSON//FANCI//MRE11//NOP53
GO:0010212	response_to_ionizing_radiation	Biological Process	19	152	1086	18342	0.00163868	0.0828538	2.7855	2.11119	0.0174954	ATR//BLM//BRCA1//BRCC3//CLK2//ERCC1//FBXO4//MAP3K20//MGMT//MTA1//NUCKS1//PRKDC//RAD51AP1//RAD51D//RAD54L//RRM1//USP28//WRN//XRCC2
GO:0006101	citrate_metabolic_process	Biological Process	8	39	1086	18342	0.0017486	0.0866578	2.75731	3.46451	0.00736648	ACO2//DHTKD1//FAHD1//FH//IDH2//ME3//STAT5B//SUCLG2
GO:0009220	pyrimidine_ribonucleotide_biosynthetic_process	Biological Process	6	23	1086	18342	0.00179378	0.0866578	2.74623	4.40596	0.00552486	CAD//CTPS1//CTPS2//DHODH//NMRK1//UCK2
GO:0070193	synaptonemal_complex_organization	Biological Process	6	23	1086	18342	0.00179378	0.0866578	2.74623	4.40596	0.00552486	AGO4//HORMAD1//MLH3//SYCE1L//SYCP2//TRIP13
GO:0002183	cytoplasmic_translational_initiation	Biological Process	5	16	1086	18342	0.00181804	0.0866578	2.7404	5.27797	0.00460405	EIF2D//EIF2S3//EIF3A//EIF3D//EIF4B
GO:0009256	10-formyltetrahydrofolate_metabolic_process	Biological Process	3	5	1086	18342	0.00189118	0.0866578	2.72327	10.1337	0.00276243	ALDH1L2//MTHFD1//MTHFD1L
GO:0043461	proton-transporting_ATP_synthase_complex_assembly	Biological Process	3	5	1086	18342	0.00189118	0.0866578	2.72327	10.1337	0.00276243	ATPAF1//FMC1//OXA1L
GO:0075525	viral_translational_termination-reinitiation	Biological Process	3	5	1086	18342	0.00189118	0.0866578	2.72327	10.1337	0.00276243	EIF3A//EIF3D//EIF3L
GO:0006766	vitamin_metabolic_process	Biological Process	16	120	1086	18342	0.00190163	0.0866578	2.72087	2.25193	0.014733	ALDH1L2//AOX1//CBR3//DHFR//HLCS//MCCC1//MCCC2//MTHFD1//MTHFD1L//MTHFD2//MTR//PM20D2//PNPO//SHMT2//UBIAD1//VKORC1L1
GO:0006335	DNA_replication-dependent_nucleosome_assembly	Biological Process	4	10	1086	18342	0.00192379	0.0866578	2.71584	6.7558	0.00368324	ASF1B//CHAF1A//CHAF1B//NASP
GO:0034427	nuclear-transcribed_mRNA_catabolic_process,_exonucleolytic,_3'-5'	Biological Process	4	10	1086	18342	0.00192379	0.0866578	2.71584	6.7558	0.00368324	EXOSC5//EXOSC6//EXOSC7//EXOSC8
GO:0046185	aldehyde_catabolic_process	Biological Process	4	10	1086	18342	0.00192379	0.0866578	2.71584	6.7558	0.00368324	ADH5//ALDH3B1//ESD//HOGA1
GO:0070673	response_to_interleukin-18	Biological Process	4	10	1086	18342	0.00192379	0.0866578	2.71584	6.7558	0.00368324	ALOX5//CLDN1//IL18//IL18BP
GO:0032787	monocarboxylic_acid_metabolic_process	Biological Process	46	499	1086	18342	0.00194997	0.0870459	2.70997	1.55695	0.0423573	AACS//ACAA2//ACAD11//ACAD9//ACAT1//ACCS//ACOT4//ACSL5//ACSM3//AIG1//ALDH5A1//ALOX5//ARV1//ASNS//BRCA1//CRYL1//DECR1//DHTKD1//EHHADH//EPHX2//ETFB//FAAH2//FADS1//GRHPR//HLCS//HOGA1//HSD17B8//IDH2//IDNK//IVD//MCCC1//MCCC2//MCEE//ME3//MECR//MTHFD1L//NIT2//PCK2//PFKL//PTGDS//SESN2//SORD//SRR//STAT5B//XBP1//ZADH2
GO:0070192	chromosome_organization_involved_in_meiotic_cell_cycle	Biological Process	11	68	1086	18342	0.0020385	0.0880543	2.69069	2.73213	0.0101289	AGO4//BRIP1//CCNB1IP1//HORMAD1//MLH1//MLH3//MRE11//MSH5//SYCE1L//SYCP2//TRIP13
GO:0006986	response_to_unfolded_protein	Biological Process	19	155	1086	18342	0.00205887	0.0880543	2.68637	2.07033	0.0174954	ASNS//CDK5RAP3//CREB3L4//DDIT3//DERL3//FICD//GFPT1//HERPUD1//HSP90B1//IGFBP1//MBTPS2//PARP16//SERPINH1//SHC1//STC2//TBL2//TMEM129//UBXN4//XBP1
GO:0009063	cellular_amino_acid_catabolic_process	Biological Process	16	121	1086	18342	0.0020739	0.0880543	2.68321	2.23332	0.014733	ACAT1//AHCY//ALDH5A1//ALDH6A1//ALDH7A1//BCKDHA//CBS//ENOSF1//HIBADH//HMGCL//HOGA1//HPDL//IVD//MCCC1//MCCC2//PHYKPL
GO:0008156	negative_regulation_of_DNA_replication	Biological Process	8	40	1086	18342	0.00207414	0.0880543	2.68316	3.3779	0.00736648	ATR//BLM//CDAN1//DONSON//MRE11//MSH3//SMC1A//TIMELESS
GO:0035735	intraciliary_transport_involved_in_cilium_assembly	Biological Process	8	40	1086	18342	0.00207414	0.0880543	2.68316	3.3779	0.00736648	CLUAP1//IFT172//IFT57//IFT74//IFT80//IFT81//PCM1//WDR34
GO:0010972	negative_regulation_of_G2|M_transition_of_mitotic_cell_cycle	Biological Process	9	49	1086	18342	0.00207918	0.0880543	2.68211	3.10215	0.00828729	BLM//BRCA1//CDK5RAP3//CHMP4C//DONSON//FANCI//MRE11//NAE1//NOP53
GO:0000729	DNA_double-strand_break_processing	Biological Process	6	24	1086	18342	0.00227333	0.0952651	2.64334	4.22238	0.00552486	BARD1//BLM//BRCA1//BRIP1//EXO1//MRE11
GO:0022406	membrane_docking	Biological Process	21	180	1086	18342	0.0022879	0.0952651	2.64056	1.97044	0.019337	B9D1//CDK5RAP2//CEP192//CEP250//CEP57//CEP89//CNTRL//ESYT2//EXOC4//HAUS4//IQCB1//MKS1//ODF2//PCM1//RABEPK//SDCCAG8//STX17//TCTN1//TMEM216//VPS11//VPS33B
GO:0034724	DNA_replication-independent_nucleosome_organization	Biological Process	8	41	1086	18342	0.00244549	0.100375	2.61163	3.29551	0.00736648	ASF1B//CENPH//CENPK//CENPL//ITGB3BP//NASP//RSF1//SUPT16H
GO:0009070	serine_family_amino_acid_biosynthetic_process	Biological Process	5	17	1086	18342	0.00245112	0.100375	2.61063	4.9675	0.00460405	CBS//CBSL//MTHFD1//SHMT2//SRR
GO:0009165	nucleotide_biosynthetic_process	Biological Process	31	306	1086	18342	0.00250775	0.101851	2.60072	1.71103	0.0285451	ACAT1//ACSL5//ATIC//ATP5S//CAD//CTPS1//CTPS2//DCAKD//DHODH//DHTKD1//GARS//GMPS//IDH2//MTHFD1//NAPRT//NDUFA10//NMRK1//NPR1//PAPSS2//PARP10//PARP16//PFAS//PFKL//PPCS//PRTFDC1//RRM1//RRM2//SLC25A13//SLC26A2//TYMS//UCK2
GO:0045132	meiotic_chromosome_segregation	Biological Process	13	91	1086	18342	0.00265265	0.106861	2.57632	2.41279	0.0119705	AGO4//BLM//BRIP1//CCNB1IP1//EME1//HORMAD1//MLH1//MLH3//MRE11//MSH5//SYCE1L//SYCP2//TRIP13
GO:0000280	nuclear_division	Biological Process	30	295	1086	18342	0.00275411	0.109855	2.56002	1.71758	0.0276243	AGO4//BLM//BRIP1//CCNB1IP1//CDT1//CEP192//CEP57//CHAMP1//CHMP3//CHMP4C//EME1//FANCA//HORMAD1//MLH1//MLH3//MND1//MRE11//MSH3//MSH5//MYBL2//NUP62//RAD51D//SMC1A//SYCE1L//SYCP2//TDRD9//TRIP13//TUBGCP5//WASHC5//XRCC2
GO:0090501	RNA_phosphodiester_bond_hydrolysis	Biological Process	20	171	1086	18342	0.00278952	0.109855	2.55447	1.97538	0.0184162	AGO4//CNOT6L//CPSF4//CPSF6//DIS3L//EXO1//EXOSC5//EXOSC6//EXOSC7//EXOSC8//FIP1L1//LACTB2//LAS1L//MOV10//NOB1//PAN2//PPP1R8//RNASEH2B//TSEN2//UTP20
GO:0000018	regulation_of_DNA_recombination	Biological Process	12	81	1086	18342	0.00280307	0.109855	2.55237	2.50215	0.0110497	BLM//EXOSC6//MAGEF1//MLH1//MRE11//MSH3//NSD2//RAD51AP1//RMI2//STAT6//UNG//WRN
GO:0006222	UMP_biosynthetic_process	Biological Process	4	11	1086	18342	0.00288217	0.109855	2.54028	6.14164	0.00368324	CAD//DHODH//NMRK1//UCK2
GO:0035330	regulation_of_hippo_signaling	Biological Process	4	11	1086	18342	0.00288217	0.109855	2.54028	6.14164	0.00368324	DLG5//NEK8//WWC1//WWC3
GO:0090656	t-circle_formation	Biological Process	4	11	1086	18342	0.00288217	0.109855	2.54028	6.14164	0.00368324	BLM//ERCC1//EXO1//WRN
GO:0090737	telomere_maintenance_via_telomere_trimming	Biological Process	4	11	1086	18342	0.00288217	0.109855	2.54028	6.14164	0.00368324	BLM//ERCC1//EXO1//WRN
GO:0035967	cellular_response_to_topologically_incorrect_protein	Biological Process	17	137	1086	18342	0.00303351	0.114741	2.51805	2.09578	0.0156538	ASNS//CDK5RAP3//CREB3L4//DDIT3//DERL3//DNAJB12//GFPT1//HDAC6//HERPUD1//HSP90B1//IGFBP1//MBTPS2//PARP16//SHC1//STC2//TBL2//XBP1
GO:0051054	positive_regulation_of_DNA_metabolic_process	Biological Process	23	209	1086	18342	0.0031034	0.11579	2.50816	1.85865	0.0211786	ANXA3//ATR//BLM//BRCA1//BRCC3//CDT1//CEBPG//DTX3L//ERCC1//EXOSC6//FBXO4//MAPKAPK5//MECP2//MGMT//MLH1//MRE11//NSD2//SLF2//STAT6//TIMELESS//UNG//WRN//XRCC1
GO:0045739	positive_regulation_of_DNA_repair	Biological Process	9	52	1086	18342	0.00317701	0.11579	2.49798	2.92318	0.00828729	BLM//BRCA1//BRCC3//CEBPG//DTX3L//MGMT//SLF2//TIMELESS//XRCC1
GO:0017144	drug_metabolic_process	Biological Process	57	665	1086	18342	0.00318214	0.11579	2.49728	1.44767	0.0524862	AACS//ACAT1//ACO2//ADH5//AHCY//ALDH1L2//ALDH3B1//ALDH5A1//AOX1//ASNS//ATP5S//CAD//CBS//COQ7//COQ9//DHFR//DHTKD1//EPHX2//ESD//FADS1//FAHD1//FH//HBE1//HLCS//HMGCL//IDH2//MAOB//MAT2A//MCCC1//MCCC2//ME3//MECP2//MT-ND5//MTHFD1//MTHFD1L//MTHFD2//MTR//NDUFA10//NDUFA7//NDUFB1//NDUFB5//NDUFV1//NDUFV3//NPR1//PCK2//PFKL//PM20D2//PNPO//PRDX2//PYCR2//SHMT2//SLC25A13//SRR//STAT5B//SUCLG2//SULT1A1//TYMS
GO:0000724	double-strand_break_repair_via_homologous_recombination	Biological Process	13	93	1086	18342	0.00322128	0.11579	2.49197	2.3609	0.0119705	BLM//BRCA1//GINS2//MRE11//NSMCE1//NUCKS1//POLL//RAD51AP1//RAD51D//RAD54L//WRN//XRCC1//XRCC2
GO:0000077	DNA_damage_checkpoint	Biological Process	17	138	1086	18342	0.003274	0.11579	2.48492	2.08059	0.0156538	ATR//BLM//BRCA1//BRCC3//BRIP1//CDK5RAP3//CNOT6L//DONSON//DTL//EME1//FANCI//MAP3K20//MRE11//NOP53//PRKDC//USP28//XPC
GO:2001020	regulation_of_response_to_DNA_damage_stimulus	Biological Process	22	198	1086	18342	0.00335477	0.11579	2.47434	1.87661	0.0202578	ANKRD1//ATR//BLM//BRCA1//BRCC3//CEBPG//DTX3L//ERCC1//FBXO4//KMT5A//MAGEF1//MGMT//NSD2//NSMCE1//RAD51AP1//RMI2//RNASEH2B//SLF2//TIMELESS//UBE2V1//WDR76//XRCC1
GO:0006886	intracellular_protein_transport	Biological Process	76	940	1086	18342	0.00342807	0.11579	2.46495	1.36553	0.0699816	ACOT4//AGK//AP1M2//AP3S2//ARL14//C2CD5//CEP57//CHCHD4//CLIP1//CLTCL1//COPA//COPG1//COPZ1//COPZ2//CPSF4//DHRS4//EHHADH//EIF2D//EPHX2//EVI5L//EXOC4//FIP1L1//GLE1//HDAC6//HERPUD1//HGS//HMGCL//HSP90B1//IMMP2L//IPO7//IPO9//LARS//MTX3//MYO1C//NOP53//NUP107//NUP210//NUP62//PEX1//PEX14//PMM1//POLR2D//RAB3GAP2//RABL3//RILPL1//RPAIN//RPL10A//RPL12//RPL14//RPL3//RPL4//SGSM2//SIL1//SLC25A6//SNX5//SRSF2//SRSF…
GO:2001022	positive_regulation_of_response_to_DNA_damage_stimulus	Biological Process	12	83	1086	18342	0.00344534	0.11579	2.46277	2.44186	0.0110497	ANKRD1//ATR//BLM//BRCA1//BRCC3//CEBPG//DTX3L//MGMT//NSMCE1//SLF2//TIMELESS//XRCC1
GO:0000453	enzyme-directed_rRNA_2'-O-methylation	Biological Process	2	2	1086	18342	0.00350259	0.11579	2.45561	16.8895	0.00184162	MRM1//TARBP1
GO:0001732	formation_of_cytoplasmic_translation_initiation_complex	Biological Process	2	2	1086	18342	0.00350259	0.11579	2.45561	16.8895	0.00184162	EIF3A//EIF3D
GO:0002086	diaphragm_contraction	Biological Process	2	2	1086	18342	0.00350259	0.11579	2.45561	16.8895	0.00184162	GAA//TNNC1
GO:0006535	cysteine_biosynthetic_process_from_serine	Biological Process	2	2	1086	18342	0.00350259	0.11579	2.45561	16.8895	0.00184162	CBS//CBSL
GO:0009257	10-formyltetrahydrofolate_biosynthetic_process	Biological Process	2	2	1086	18342	0.00350259	0.11579	2.45561	16.8895	0.00184162	MTHFD1//MTHFD1L
GO:0019285	glycine_betaine_biosynthetic_process_from_choline	Biological Process	2	2	1086	18342	0.00350259	0.11579	2.45561	16.8895	0.00184162	ALDH7A1//CHDH
GO:0031990	mRNA_export_from_nucleus_in_response_to_heat_stress	Biological Process	2	2	1086	18342	0.00350259	0.11579	2.45561	16.8895	0.00184162	POLR2D//TPR
GO:0044210	'de_novo'_CTP_biosynthetic_process	Biological Process	2	2	1086	18342	0.00350259	0.11579	2.45561	16.8895	0.00184162	CTPS1//CTPS2
GO:0046294	formaldehyde_catabolic_process	Biological Process	2	2	1086	18342	0.00350259	0.11579	2.45561	16.8895	0.00184162	ADH5//ESD
GO:2000104	negative_regulation_of_DNA-dependent_DNA_replication	Biological Process	6	26	1086	18342	0.00351388	0.11579	2.45421	3.89758	0.00552486	BLM//DONSON//MRE11//MSH3//SMC1A//TIMELESS
GO:0000725	recombinational_repair	Biological Process	13	94	1086	18342	0.00354068	0.11579	2.45091	2.33578	0.0119705	BLM//BRCA1//GINS2//MRE11//NSMCE1//NUCKS1//POLL//RAD51AP1//RAD51D//RAD54L//WRN//XRCC1//XRCC2
GO:0009062	fatty_acid_catabolic_process	Biological Process	13	94	1086	18342	0.00354068	0.11579	2.45091	2.33578	0.0119705	ACAA2//ACAD11//ACAD9//ACAT1//AIG1//DECR1//EHHADH//ETFB//IVD//MCEE//MECR//PCK2//SESN2
GO:0022904	respiratory_electron_transport_chain	Biological Process	14	105	1086	18342	0.00355199	0.11579	2.44953	2.25193	0.0128913	ALDH5A1//COQ7//COQ9//IMMP2L//MECP2//MT-ND5//MYBBP1A//NDUFA10//NDUFA7//NDUFB1//NDUFB5//NDUFV1//NDUFV3//SLC25A13
GO:0000706	meiotic_DNA_double-strand_break_processing	Biological Process	3	6	1086	18342	0.00361586	0.116341	2.44179	8.44475	0.00276243	BLM//BRIP1//EXO1
GO:0071569	protein_ufmylation	Biological Process	3	6	1086	18342	0.00361586	0.116341	2.44179	8.44475	0.00276243	CDK5RAP3//UFL1//UFM1
GO:0051641	cellular_localization	Biological Process	170	2367	1086	18342	0.00369173	0.117907	2.43277	1.21302	0.156538	ACOT4//AGK//AGRN//ANXA8//AP1M2//AP3S2//ARHGAP1//ARL14//ARV1//ATL3//ATR//B9D1//BARD1//BBS1//BLOC1S4//C2CD5//CCDC14//CDK5RAP2//CDT1//CEP192//CEP250//CEP57//CEP68//CEP89//CHAMP1//CHCHD4//CHMP3//CHMP4C//CLIP1//CLTCL1//CLUAP1//CNTLN//CNTRL//COG1//COG4//COG8//COL7A1//COPA//COPG1//COPZ1//COPZ2//CPSF4//DCTN5//DDIT3//DHRS4//DTX3L//EHHADH//EIF2D//EPHX2//ESYT2//EVI5L//EXOC4//F8//FGF2//FIP1L1//FLOT2//GAA//GB…
GO:0043043	peptide_biosynthetic_process	Biological Process	68	827	1086	18342	0.00371212	0.117907	2.43038	1.38874	0.0626151	AARS//AIMP1//ALG10B//B4GALNT2//CSGALNACT1//DARS//DERL3//DPM3//EEF1B2//EEF2//EEF2K//EEFSEC//EIF2D//EIF2S3//EIF3A//EIF3D//EIF3L//EIF4A2//EIF4B//FARSB//GARS//GEMIN5//GFPT1//GGCT//GSS//GTF2H3//GTPBP2//HHAT//IARS//IGF2BP3//IL18//LARS//MRPL2//MRPL21//MRPL24//MRPL33//MRPS18B//MRPS25//MRPS27//MRRF//MTERF3//MTFMT//MTIF2//NARS//NDUFA7//OGT//OXA1L//PABPC4//PAWR//PIGC//PIGW//PMM1//RMND1//RPL10A//RPL12//RPL14…
GO:0008652	cellular_amino_acid_biosynthetic_process	Biological Process	12	84	1086	18342	0.00380828	0.120142	2.41927	2.41279	0.0110497	ACCS//AHCY//ASNS//ASS1//CAD//CBS//CBSL//MTHFD1//MTR//PYCR2//SHMT2//SRR
GO:0031023	microtubule_organizing_center_organization	Biological Process	14	106	1086	18342	0.00387531	0.120142	2.41169	2.23069	0.0128913	BRCA1//CDK5RAP2//CEP250//CEP68//CNTLN//HAUS4//KIAA0753//NUP62//ODF2//PCLAF//PCM1//SDCCAG8//TUBGCP5//XRCC2
GO:0006120	mitochondrial_electron_transport,_NADH_to_ubiquinone	Biological Process	8	44	1086	18342	0.00387783	0.120142	2.41141	3.07082	0.00736648	COQ9//MT-ND5//NDUFA10//NDUFA7//NDUFB1//NDUFB5//NDUFV1//NDUFV3
GO:0006099	tricarboxylic_acid_cycle	Biological Process	7	35	1086	18342	0.00390372	0.120142	2.40852	3.3779	0.00644567	ACO2//DHTKD1//FAHD1//FH//IDH2//ME3//SUCLG2
GO:0006984	ER-nucleus_signaling_pathway	Biological Process	7	35	1086	18342	0.00390372	0.120142	2.40852	3.3779	0.00644567	ASNS//DDIT3//HERPUD1//HSP90B1//IGFBP1//MBTPS2//XBP1
GO:0006563	L-serine_metabolic_process	Biological Process	4	12	1086	18342	0.00412217	0.121622	2.38487	5.62983	0.00368324	CBS//CBSL//SHMT2//SRR
GO:0009396	folic_acid-containing_compound_biosynthetic_process	Biological Process	4	12	1086	18342	0.00412217	0.121622	2.38487	5.62983	0.00368324	ATIC//DHFR//MTHFD1//MTHFD1L
GO:0010457	centriole-centriole_cohesion	Biological Process	4	12	1086	18342	0.00412217	0.121622	2.38487	5.62983	0.00368324	CEP250//CEP68//CNTLN//ODF2
GO:0031125	rRNA_3'-end_processing	Biological Process	4	12	1086	18342	0.00412217	0.121622	2.38487	5.62983	0.00368324	EXOSC5//EXOSC6//EXOSC7//EXOSC8
GO:0036499	PERK-mediated_unfolded_protein_response	Biological Process	4	12	1086	18342	0.00412217	0.121622	2.38487	5.62983	0.00368324	ASNS//DDIT3//HERPUD1//IGFBP1
GO:0009259	ribonucleotide_metabolic_process	Biological Process	42	464	1086	18342	0.00414161	0.121622	2.38283	1.52879	0.038674	ACAT1//ACOT4//ACSL5//ACSM3//ATIC//ATP5S//CAD//COQ7//COQ9//CTPS1//CTPS2//DCAKD//DHODH//DHTKD1//GMPS//HMGCL//MCCC2//MCEE//MECP2//MOCOS//MT-ND5//NDUFA10//NDUFA7//NDUFB1//NDUFB5//NDUFV1//NDUFV3//NMRK1//NPR1//NUDT3//PAPSS2//PDE10A//PFAS//PFKL//PPCS//PRTFDC1//RNASEH2B//SLC25A13//SLC26A2//SUCLG2//SULT1A1//UCK2
GO:0006081	cellular_aldehyde_metabolic_process	Biological Process	10	64	1086	18342	0.00415412	0.121622	2.38152	2.63898	0.0092081	ADH5//ALDH3B1//ALDH7A1//DERA//ESD//GRHPR//H6PD//HOGA1//IDH2//PNPO
GO:0000097	sulfur_amino_acid_biosynthetic_process	Biological Process	5	19	1086	18342	0.00417271	0.121622	2.37958	4.44461	0.00460405	AHCY//CBS//CBSL//MTHFD1//MTR
GO:2000781	positive_regulation_of_double-strand_break_repair	Biological Process	5	19	1086	18342	0.00417271	0.121622	2.37958	4.44461	0.00460405	BLM//DTX3L//MGMT//SLF2//TIMELESS
GO:0007005	mitochondrion_organization	Biological Process	41	451	1086	18342	0.00424831	0.123102	2.37178	1.53541	0.0377532	ACAA2//ACAD9//ADGRG6//AFG3L2//AGK//ATP5S//ATPAF1//CEP89//CHCHD4//COA5//DMAC1//FMC1//GGCT//HMGCL//IMMP2L//LONP1//LYRM7//MT-ND5//MTX3//NDUFA10//NDUFA7//NDUFAF6//NDUFB1//NDUFB5//NDUFV1//NDUFV3//NOL3//OXA1L//PET117//PPRC1//PRIMPOL//PTCD2//RHOT1//SDHAF1//SDHAF4//SESN2//SLC25A6//SMIM20//TIMM10B//TIMM9//TOMM20
GO:0009056	catabolic_process	Biological Process	146	2004	1086	18342	0.00430422	0.123996	2.36611	1.23047	0.134438	ACAA2//ACAD11//ACAD9//ACAT1//ACOT4//ADH5//AGO4//AGRN//AHCY//AIG1//ALDH1L2//ALDH3B1//ALDH5A1//ALDH6A1//ALDH7A1//ANAPC16//AOX1//BACE2//BCKDHA//C9orf72//CBR3//CBS//CHDH//CHMP3//CHMP4C//CNOT6L//CRYL1//DCP1B//DDIT3//DECR1//DERA//DERL3//DHTKD1//DIS3L//DNAJB12//DNPH1//DRAM2//DTL//DTX3L//EHHADH//ENOSF1//EPHX2//ERAP1//ESD//ETFB//EXOSC5//EXOSC6//EXOSC7//EXOSC8//FBXL16//FBXL20//FBXL4//FBXL5//FBXO4//FBXW4//F…
GO:0007093	mitotic_cell_cycle_checkpoint	Biological Process	18	154	1086	18342	0.00444946	0.127201	2.35169	1.9741	0.0165746	BLM//BRCA1//CDK5RAP3//CHMP4C//CNOT6L//DONSON//EME1//FANCI//KNTC1//MAP3K20//MRE11//NAE1//NOP53//PRKDC//TPR//TRIP13//WNT9A//XPC
GO:0045786	negative_regulation_of_cell_cycle	Biological Process	48	549	1086	18342	0.0044668	0.127201	2.35	1.47668	0.0441989	ATR//BARD1//BLM//BRCA1//BRCC3//BRIP1//CBX5//CDK5RAP2//CDK5RAP3//CDK6//CDT1//CHMP4C//CNOT6L//DDIT3//DONSON//DTL//EME1//FANCI//HORMAD1//ING4//IPO7//KAT2B//KNTC1//MAP3K20//MRE11//NAE1//NLE1//NOP53//NUPR1//PHC3//PPP1R15A//PRKDC//RASSF1//RBL1//RRM2//SMC1A//STRADB//TFAP4//TIMELESS//TOM1L1//TPR//TPRA1//TRIP13//TSG101//USP28//WDR6//WNT9A//XPC
GO:0033260	nuclear_DNA_replication	Biological Process	7	36	1086	18342	0.00460298	0.13033	2.33696	3.28407	0.00644567	CDT1//DONSON//GINS2//LIG1//POLD2//POLD3//PRIM1
GO:0051259	protein_complex_oligomerization	Biological Process	43	481	1086	18342	0.00467781	0.131696	2.32996	1.50987	0.0395948	ACAT1//ALDH5A1//ATL3//ATXN10//BLM//CBY1//CEP57//CHMP3//CLDN1//CPSF6//DDIT3//DECR1//DGKD//DHRS4//FARSB//GBP1//GRHPR//HBE1//HGSNAT//HMGCL//HSD17B8//ITPR3//KCTD15//LONP1//LY6G5B//MAT2A//MCCC1//MCCC2//MLKL//NOL3//NUP62//OXA1L//PEX14//PFKL//PRKCZ//RASEF//RRM1//SHMT2//SIGMAR1//SRR//THG1L//TMED10//USP16
GO:1901990	regulation_of_mitotic_cell_cycle_phase_transition	Biological Process	36	386	1086	18342	0.00474809	0.13292	2.32348	1.57519	0.0331492	BLM//BRCA1//CDK5RAP2//CDK5RAP3//CDK6//CDT1//CEP192//CEP250//CEP57//CHMP4C//CNOT6L//CNTRL//DONSON//DTL//FANCI//HAUS4//KNTC1//MECP2//MRE11//NAE1//NOP53//ODF2//PCM1//PRKDC//PSME1//RBL1//RCC2//RDX//RNASEH2B//SDCCAG8//STOX1//TFAP4//TPR//TPRA1//TRIP13//XPC
GO:0034620	cellular_response_to_unfolded_protein	Biological Process	15	120	1086	18342	0.00483267	0.134527	2.31581	2.11119	0.0138122	ASNS//CDK5RAP3//CREB3L4//DDIT3//DERL3//GFPT1//HERPUD1//HSP90B1//IGFBP1//MBTPS2//PARP16//SHC1//STC2//TBL2//XBP1
GO:0046907	intracellular_transport	Biological Process	116	1555	1086	18342	0.00524904	0.145302	2.27992	1.25992	0.106814	ACOT4//AGK//ANXA8//AP1M2//AP3S2//ARHGAP1//ARL14//ARV1//ATL3//BLOC1S4//C2CD5//CEP57//CHCHD4//CHMP3//CHMP4C//CLIP1//CLTCL1//CLUAP1//COG1//COG4//COG8//COL7A1//COPA//COPG1//COPZ1//COPZ2//CPSF4//DCTN5//DHRS4//DTX3L//EHHADH//EIF2D//EPHX2//EVI5L//EXOC4//F8//FIP1L1//GEMIN5//GLE1//HDAC6//HERPUD1//HGS//HMGCL//HSP90B1//IFT172//IFT57//IFT74//IFT80//IFT81//IMMP2L//IPO7//IPO9//LARS//LDLRAP1//LRPPRC//MTX3//MYO1…
GO:0016075	rRNA_catabolic_process	Biological Process	5	20	1086	18342	0.00529616	0.145792	2.27604	4.22238	0.00460405	DIS3L//EXOSC5//EXOSC6//EXOSC7//EXOSC8
GO:0033365	protein_localization_to_organelle	Biological Process	57	683	1086	18342	0.00556507	0.152076	2.25453	1.40952	0.0524862	ACOT4//AGK//ATR//BARD1//BBS1//CCDC14//CEP192//CEP250//CEP57//CEP68//CHAMP1//CHCHD4//CNTLN//DDIT3//DHRS4//EHHADH//EPHX2//GBP1//HGS//HMGCL//IMMP2L//IPO7//IPO9//KIAA0753//LARS//LRSAM1//MTX3//NOP53//NUP107//NUP62//PCM1//PEX1//PEX14//PMM1//PPP1R15A//RAB3GAP2//RCC2//RPAIN//RPL10A//RPL12//RPL14//RPL3//RPL4//RYR2//SLC25A6//SLF2//TCTN1//TIA1//TIMM10B//TIMM9//TMEM107//TOMM20//TPR//TSC2//VPS36//WRN//XPA
GO:0019081	viral_translation	Biological Process	4	13	1086	18342	0.0056779	0.152076	2.24581	5.19677	0.00368324	EIF2D//EIF3A//EIF3D//EIF3L
GO:0046459	short-chain_fatty_acid_metabolic_process	Biological Process	4	13	1086	18342	0.0056779	0.152076	2.24581	5.19677	0.00368324	ACOT4//ALDH5A1//MCEE//PCK2
GO:0106074	aminoacyl-tRNA_metabolism_involved_in_translational_fidelity	Biological Process	4	13	1086	18342	0.0056779	0.152076	2.24581	5.19677	0.00368324	AARS//DTD1//IARS//LARS
GO:1900025	negative_regulation_of_substrate_adhesion-dependent_cell_spreading	Biological Process	4	13	1086	18342	0.0056779	0.152076	2.24581	5.19677	0.00368324	DMTN//GBP1//RCC2//TACSTD2
GO:0006282	regulation_of_DNA_repair	Biological Process	14	111	1086	18342	0.00586989	0.156373	2.23137	2.13021	0.0128913	BLM//BRCA1//BRCC3//CEBPG//DTX3L//MAGEF1//MGMT//NSD2//RAD51AP1//RMI2//SLF2//TIMELESS//UBE2V1//XRCC1
GO:0006768	biotin_metabolic_process	Biological Process	3	7	1086	18342	0.00605008	0.159458	2.21824	7.23836	0.00276243	HLCS//MCCC1//MCCC2
GO:0035655	interleukin-18-mediated_signaling_pathway	Biological Process	3	7	1086	18342	0.00605008	0.159458	2.21824	7.23836	0.00276243	ALOX5//IL18//IL18BP
GO:0046134	pyrimidine_nucleoside_biosynthetic_process	Biological Process	6	29	1086	18342	0.00623093	0.163356	2.20545	3.49438	0.00552486	CAD//CTPS1//CTPS2//DHODH//NMRK1//UCK2
GO:0006635	fatty_acid_beta-oxidation	Biological Process	9	58	1086	18342	0.00670272	0.1748	2.17375	2.62078	0.00828729	ACAA2//ACAD11//ACAT1//DECR1//EHHADH//ETFB//IVD//MECR//SESN2
GO:1901565	organonitrogen_compound_catabolic_process	Biological Process	80	1026	1086	18342	0.00681065	0.176685	2.16681	1.31692	0.0736648	ACAT1//AGRN//AHCY//ALDH1L2//ALDH5A1//ALDH6A1//ALDH7A1//ANAPC16//AOX1//BACE2//BCKDHA//CBS//CHDH//CHMP4C//DDIT3//DERA//DERL3//DNAJB12//DNPH1//DTL//DTX3L//ENOSF1//ERAP1//FBXL16//FBXL20//FBXL4//FBXL5//FBXO4//FBXW4//FGF2//HDAC6//HERPUD1//HGSNAT//HIBADH//HMGCL//HOGA1//HPDL//HSP90B1//HSPG2//IVD//LONP1//LRSAM1//MAOB//MBD4//MCCC1//MCCC2//MTA1//NGLY1//NHLRC3//NUDT3//PDE10A//PHYKPL//PM20D2//PRTFDC1//PSMB10/…
GO:0045727	positive_regulation_of_translation	Biological Process	14	113	1086	18342	0.00686823	0.177157	2.16316	2.0925	0.0128913	CIRBP//EEF2//EIF3D//FAM129A//MRPS27//POLR2D//PPP1R15A//RBM3//RBMS3//RMND1//RPS6KB1//UPF3A//USP16//VIM
GO:0044267	cellular_protein_metabolic_process	Biological Process	257	3787	1086	18342	0.00690034	0.177157	2.16113	1.14618	0.236648	AARS//ADH5//AFG3L2//AIMP1//ALG10B//ANAPC16//ASPH//ASPHD1//ATR//AXL//B4GALNT2//BARD1//BRCA1//BRCC3//CAD//CAMKK1//CAMKK2//CCNB1IP1//CDC42BPB//CDK5RAP3//CDK6//CHCHD4//CHMP4C//CLK2//CNTRL//CRTAP//CSF2RA//DARS//DCAF10//DCAF8//DDIT3//DERL3//DNAJB12//DPH5//DPH7//DPM3//DTL//DTX3L//EEF1AKMT1//EEF1B2//EEF2//EEF2K//EEF2KMT//EEFSEC//EHHADH//EIF2AK1//EIF2D//EIF2S3//EIF3A//EIF3D//EIF3L//EIF4A2//EIF4B//ELK4//EP…
GO:0000082	G1|S_transition_of_mitotic_cell_cycle	Biological Process	15	125	1086	18342	0.00704747	0.180001	2.15197	2.02674	0.0138122	CDK6//CDT1//DHFR//IQGAP3//MCM2//MCM3//MCM4//MCM5//MCM6//NASP//PRIM1//RPS6KB1//RRM2//SKP2//TYMS
GO:0006111	regulation_of_gluconeogenesis	Biological Process	7	39	1086	18342	0.00727073	0.183808	2.13842	3.03145	0.00644567	CLK2//KAT2B//LEPR//NLN//OGT//SESN2//WDR5
GO:0006891	intra-Golgi_vesicle-mediated_transport	Biological Process	7	39	1086	18342	0.00727073	0.183808	2.13842	3.03145	0.00644567	COG1//COG4//COG8//COPA//COPG1//COPZ1//COPZ2
GO:0045184	establishment_of_protein_localization	Biological Process	112	1511	1086	18342	0.00731834	0.184073	2.13559	1.2519	0.103131	ACOT4//AGK//AP1M2//AP3S2//ARHGAP1//ARL14//ATP6V1E2//BBS1//C2CD5//CEP57//CHCHD4//CHMP3//CHMP4C//CLIP1//CLTCL1//COG1//COG4//COG8//COPA//COPG1//COPZ1//COPZ2//CPSF4//DDIT3//DGKD//DHRS4//DMTN//DTX3L//EHHADH//EIF2D//EPHX2//EVI5L//EXOC4//FIP1L1//GLE1//HDAC6//HERPUD1//HGS//HMGCL//HSP90B1//IMMP2L//IPO7//IPO9//LARS//LIMS1//LRSAM1//MTX3//MYH9//MYO1C//NASP//NOP53//NUP107//NUP210//NUP62//OXA1L//PEX1//PEX14//P…
GO:0044843	cell_cycle_G1|S_phase_transition	Biological Process	15	126	1086	18342	0.00757516	0.185644	2.12061	2.01066	0.0138122	CDK6//CDT1//DHFR//IQGAP3//MCM2//MCM3//MCM4//MCM5//MCM6//NASP//PRIM1//RPS6KB1//RRM2//SKP2//TYMS
GO:0006534	cysteine_metabolic_process	Biological Process	4	14	1086	18342	0.00758096	0.185644	2.12028	4.82557	0.00368324	AHCY//CBS//CBSL//MTHFD1
GO:0009113	purine_nucleobase_biosynthetic_process	Biological Process	4	14	1086	18342	0.00758096	0.185644	2.12028	4.82557	0.00368324	GMPS//MTHFD1//MTHFD1L//PRTFDC1
GO:0071028	nuclear_mRNA_surveillance	Biological Process	4	14	1086	18342	0.00758096	0.185644	2.12028	4.82557	0.00368324	EXOSC5//EXOSC6//EXOSC7//EXOSC8
GO:0006325	chromatin_organization	Biological Process	60	737	1086	18342	0.00759673	0.185644	2.11937	1.37499	0.0552486	ANP32B//ASF1B//ATAD2//BRCC3//BRD9//CDAN1//CENPH//CENPK//CENPL//CHAF1A//CHAF1B//DTX3L//ELK4//EP400//FAM172A//FKBP10//GATAD1//HDAC6//HIST1H2AG//HLCS//HMG20B//HP1BP3//ING4//ING5//ITGB3BP//KAT2B//KMT5A//LAS1L//MCM2//MECP2//MTA1//NASP//NSD2//NUAK2//NUCKS1//OGT//PHF10//PHF2//PHF20//PPM1F//PRMT3//RBL1//RCBTB1//RCCD1//RIOX2//RSF1//SCMH1//SETD6//SETD7//SMARCE1//SUPT16H//TADA2A//TAF12//TSPYL4//USP16//USP36…
GO:0051209	release_of_sequestered_calcium_ion_into_cytosol	Biological Process	8	49	1086	18342	0.00760561	0.185644	2.11887	2.75747	0.00736648	DDIT3//FGF2//ITPR3//JPH2//NOL3//RASA3//RYR2//TPCN1
GO:0001889	liver_development	Biological Process	15	127	1086	18342	0.00813391	0.196124	2.0897	1.99482	0.0138122	AACS//ACAT1//ACO2//ASNS//ASS1//CAD//CEBPG//CLDN1//HMGCL//PCK2//PHF2//PTCD2//SRSF5//TYMS//XBP1
GO:0008033	tRNA_processing	Biological Process	15	127	1086	18342	0.00813391	0.196124	2.0897	1.99482	0.0138122	AARS//ADAT2//DUS3L//METTL8//MTFMT//NAT10//PUS7//PUS7L//QTRT1//SARS//TARBP1//THG1L//TRMT13//TRNT1//TSEN2
GO:0045830	positive_regulation_of_isotype_switching	Biological Process	5	22	1086	18342	0.00815369	0.196124	2.08865	3.83852	0.00460405	EXOSC6//MLH1//NSD2//STAT6//UNG
GO:0006336	DNA_replication-independent_nucleosome_assembly	Biological Process	7	40	1086	18342	0.00837303	0.198604	2.07712	2.95566	0.00644567	ASF1B//CENPH//CENPK//CENPL//ITGB3BP//NASP//RSF1
GO:0031146	SCF-dependent_proteasomal_ubiquitin-dependent_protein_catabolic_process	Biological Process	7	40	1086	18342	0.00837303	0.198604	2.07712	2.95566	0.00644567	FBXL16//FBXL20//FBXL4//FBXL5//FBXO4//FBXW4//SKP2
GO:0000288	nuclear-transcribed_mRNA_catabolic_process,_deadenylation-dependent_decay	Biological Process	9	60	1086	18342	0.00837703	0.198604	2.07691	2.53343	0.00828729	CNOT6L//DCP1B//EXOSC5//EXOSC6//EXOSC7//EXOSC8//MLH1//PAN2//POLR2D
GO:0032543	mitochondrial_translation	Biological Process	14	116	1086	18342	0.00861469	0.203164	2.06476	2.03839	0.0128913	GARS//MRPL2//MRPL21//MRPL24//MRPL33//MRPS18B//MRPS25//MRPS27//MRRF//MTERF3//MTIF2//NDUFA7//OXA1L//WARS2
GO:0006364	rRNA_processing	Biological Process	21	202	1086	18342	0.00869118	0.203164	2.06092	1.75584	0.019337	DIS3L//EMG1//EXOSC5//EXOSC6//EXOSC7//EXOSC8//FBXW9//LAS1L//MRM1//MRTO4//NAT10//NOB1//NOLC1//NOP56//RBFA//RPL10A//RPL14//RRP1//TARBP1//UTP20//WDR43
GO:0006270	DNA_replication_initiation	Biological Process	6	31	1086	18342	0.00873337	0.203164	2.05882	3.26894	0.00552486	GINS2//MCM2//MCM3//MCM4//MCM5//MCM6
GO:0034080	CENP-A_containing_nucleosome_assembly	Biological Process	6	31	1086	18342	0.00873337	0.203164	2.05882	3.26894	0.00552486	CENPH//CENPK//CENPL//ITGB3BP//NASP//RSF1
GO:0051649	establishment_of_localization_in_cell	Biological Process	129	1783	1086	18342	0.00897618	0.206608	2.04691	1.22196	0.118785	ACOT4//AGK//ANXA8//AP1M2//AP3S2//ARHGAP1//ARL14//ARV1//ATL3//BLOC1S4//C2CD5//CDK5RAP2//CDT1//CEP57//CHAMP1//CHCHD4//CHMP3//CHMP4C//CLIP1//CLTCL1//CLUAP1//COG1//COG4//COG8//COL7A1//COPA//COPG1//COPZ1//COPZ2//CPSF4//DCTN5//DDIT3//DHRS4//DTX3L//EHHADH//EIF2D//EPHX2//EVI5L//EXOC4//F8//FGF2//FIP1L1//GEMIN5//GLE1//HDAC6//HERPUD1//HGS//HMGCL//HSP90B1//IFT172//IFT57//IFT74//IFT80//IFT81//IMMP2L//IPO7//IP…
GO:0006575	cellular_modified_amino_acid_metabolic_process	Biological Process	21	203	1086	18342	0.00917112	0.206608	2.03758	1.74719	0.019337	AHCY//ALDH1L2//ALDH5A1//ALDH7A1//ASS1//ATIC//CHDH//CRTAP//DHFR//GGCT//GSS//HOGA1//MTHFD1//MTHFD1L//MTHFD2//OSBPL5//P4HTM//PM20D2//SHMT2//STAT5B//TYMS
GO:0000019	regulation_of_mitotic_recombination	Biological Process	3	8	1086	18342	0.0092567	0.206608	2.03354	6.33356	0.00276243	BLM//MLH1//MRE11
GO:0032790	ribosome_disassembly	Biological Process	3	8	1086	18342	0.0092567	0.206608	2.03354	6.33356	0.00276243	EIF2D//MRRF//MTIF2
GO:0035331	negative_regulation_of_hippo_signaling	Biological Process	3	8	1086	18342	0.0092567	0.206608	2.03354	6.33356	0.00276243	DLG5//WWC1//WWC3
GO:0044387	negative_regulation_of_protein_kinase_activity_by_regulation_of_protein_phosphorylation	Biological Process	3	8	1086	18342	0.0092567	0.206608	2.03354	6.33356	0.00276243	ADARB1//CDK5RAP3//PPM1F
GO:0046600	negative_regulation_of_centriole_replication	Biological Process	3	8	1086	18342	0.0092567	0.206608	2.03354	6.33356	0.00276243	BRCA1//CDK5RAP2//KAT2B
GO:0051026	chiasma_assembly	Biological Process	3	8	1086	18342	0.0092567	0.206608	2.03354	6.33356	0.00276243	BRIP1//CCNB1IP1//MSH5
GO:0051409	response_to_nitrosative_stress	Biological Process	3	8	1086	18342	0.0092567	0.206608	2.03354	6.33356	0.00276243	ADH5//DDIT3//STOX1
GO:0051262	protein_tetramerization	Biological Process	15	129	1086	18342	0.00934957	0.207745	2.02921	1.9639	0.0138122	ALDH5A1//CBY1//CPSF6//DECR1//DHRS4//FARSB//HMGCL//HSD17B8//OXA1L//PFKL//RRM1//SHMT2//SRR//THG1L//USP16
GO:0042073	intraciliary_transport	Biological Process	8	51	1086	18342	0.00968023	0.214075	2.01411	2.64933	0.00736648	CLUAP1//IFT172//IFT57//IFT74//IFT80//IFT81//PCM1//WDR34
GO:0003011	involuntary_skeletal_muscle_contraction	Biological Process	2	3	1086	18342	0.0100937	0.214075	1.99595	11.2597	0.00184162	GAA//TNNC1
GO:0010705	meiotic_DNA_double-strand_break_processing_involved_in_reciprocal_meiotic_recombination	Biological Process	2	3	1086	18342	0.0100937	0.214075	1.99595	11.2597	0.00184162	BLM//BRIP1
GO:0019276	UDP-N-acetylgalactosamine_metabolic_process	Biological Process	2	3	1086	18342	0.0100937	0.214075	1.99595	11.2597	0.00184162	B4GALNT2//CSGALNACT1
GO:0019343	cysteine_biosynthetic_process_via_cystathionine	Biological Process	2	3	1086	18342	0.0100937	0.214075	1.99595	11.2597	0.00184162	CBS//CBSL
GO:0034473	U1_snRNA_3'-end_processing	Biological Process	2	3	1086	18342	0.0100937	0.214075	1.99595	11.2597	0.00184162	EXOSC7//EXOSC8
GO:0034476	U5_snRNA_3'-end_processing	Biological Process	2	3	1086	18342	0.0100937	0.214075	1.99595	11.2597	0.00184162	EXOSC7//EXOSC8
GO:0042094	interleukin-2_biosynthetic_process	Biological Process	2	3	1086	18342	0.0100937	0.214075	1.99595	11.2597	0.00184162	IL18//PAWR
GO:0044205	'de_novo'_UMP_biosynthetic_process	Biological Process	2	3	1086	18342	0.0100937	0.214075	1.99595	11.2597	0.00184162	CAD//DHODH
GO:0070537	histone_H2A_K63-linked_deubiquitination	Biological Process	2	3	1086	18342	0.0100937	0.214075	1.99595	11.2597	0.00184162	BRCC3//USP16
GO:0006979	response_to_oxidative_stress	Biological Process	34	378	1086	18342	0.0101097	0.214075	1.99526	1.51916	0.0313076	ALDH3B1//APTX//AXL//CAMKK2//EEF2//ERCC1//FOSL1//GSS//HDAC6//IL18BP//LONP1//MGMT//MT-ND5//MTR//NAPRT//PRDX2//PSIP1//PXMP2//PYCR2//PYROXD1//SCARA3//SESN2//SIGMAR1//SLC7A11//SP1//STAT6//STC2//TXNRD2//TXNRD3//VKORC1L1//VRK2//WRN//XPA//XRCC1
GO:0048285	organelle_fission	Biological Process	30	324	1086	18342	0.0103106	0.2174	1.98672	1.56384	0.0276243	AGO4//BLM//BRIP1//CCNB1IP1//CDT1//CEP192//CEP57//CHAMP1//CHMP3//CHMP4C//EME1//FANCA//HORMAD1//MLH1//MLH3//MND1//MRE11//MSH3//MSH5//MYBL2//NUP62//RAD51D//SMC1A//SYCE1L//SYCP2//TDRD9//TRIP13//TUBGCP5//WASHC5//XRCC2
GO:0034645	cellular_macromolecule_biosynthetic_process	Biological Process	246	3643	1086	18342	0.010493	0.220093	1.9791	1.14049	0.226519	AARS//AIMP1//ALG10B//ANKRD1//ARGLU1//ARNTL2//ASF1B//ATAD2//ATR//B4GALNT2//BARD1//BLM//BORCS8-MEF2B//BRCA1//BRD9//BRIP1//CCDC85B//CDCA7//CDCA7L//CDT1//CEBPG//CHAF1A//CHAF1B//CITED4//CNOT6L//COMMD6//CPSF4//CREB3L4//CSGALNACT1//DARS//DDIT3//DEAF1//DERL3//DONSON//DPM3//DTD1//DTL//E2F3//EEF1B2//EEF2//EEF2K//EEFSEC//EID2B//EIF2D//EIF2S3//EIF3A//EIF3D//EIF3L//EIF4A2//EIF4B//ELK4//EME1//EXO1//FAM111A//FA…
GO:0051291	protein_heterooligomerization	Biological Process	13	107	1086	18342	0.0105375	0.220093	1.97726	2.052	0.0119705	CHMP3//CLDN1//CPSF6//FARSB//HBE1//HSD17B8//ITPR3//MAT2A//MCCC1//MCCC2//NUP62//PRKCZ//RRM1
GO:0007032	endosome_organization	Biological Process	10	73	1086	18342	0.0105716	0.220093	1.97586	2.31363	0.0092081	ALS2CL//ANXA8//CHMP3//CHMP4C//HGS//PI4K2B//TSG101//VPS11//VPS33B//VPS36
GO:0015031	protein_transport	Biological Process	106	1440	1086	18342	0.0108554	0.224877	1.96435	1.24326	0.0976059	ACOT4//AGK//AP1M2//AP3S2//ARHGAP1//ARL14//ATP6V1E2//BBS1//C2CD5//CEP57//CHCHD4//CHMP3//CHMP4C//CLIP1//CLTCL1//COG1//COG4//COG8//COPA//COPG1//COPZ1//COPZ2//CPSF4//DGKD//DHRS4//DMTN//DTX3L//EHHADH//EIF2D//EPHX2//EVI5L//EXOC4//FIP1L1//GLE1//HDAC6//HERPUD1//HGS//HMGCL//HSP90B1//IMMP2L//IPO7//IPO9//LARS//LRSAM1//MTX3//MYH9//MYO1C//NASP//NOP53//NUP107//NUP210//NUP62//OXA1L//PEX1//PEX14//PMM1//POLR2D//R…
GO:0008104	protein_localization	Biological Process	145	2043	1086	18342	0.0108921	0.224877	1.96289	1.19872	0.133517	ACOT4//AGK//AGRN//AKAP7//AP1M2//AP3S2//ARHGAP1//ARL14//ATP6V1E2//ATR//BARD1//BBS1//C2CD5//CBY1//CCDC14//CDAN1//CEP192//CEP250//CEP57//CEP68//CHAMP1//CHCHD4//CHMP3//CHMP4C//CLIP1//CLTCL1//CNTLN//COG1//COG4//COG8//COPA//COPG1//COPZ1//COPZ2//CPSF4//DDIT3//DDX42//DGKD//DHRS4//DLG5//DMTN//DTX3L//EHHADH//EIF2D//EPHX2//EVI5L//EXOC4//FIP1L1//FLOT2//GBP1//GLE1//HDAC6//HERPUD1//HGS//HMGCL//HSP90B1//IKBKB//…
GO:0010824	regulation_of_centrosome_duplication	Biological Process	7	42	1086	18342	0.0109387	0.224902	1.96103	2.81492	0.00644567	BRCA1//CDK5RAP2//CHMP3//CHMP4C//KAT2B//NUP62//POC1A
GO:0006631	fatty_acid_metabolic_process	Biological Process	29	313	1086	18342	0.0114274	0.233108	1.94205	1.56484	0.0267035	AACS//ACAA2//ACAD11//ACAD9//ACAT1//ACOT4//ACSL5//ACSM3//AIG1//ALDH5A1//ALOX5//BRCA1//CRYL1//DECR1//EHHADH//EPHX2//ETFB//FAAH2//FADS1//HSD17B8//IVD//MCEE//MECR//PCK2//PTGDS//SESN2//STAT5B//XBP1//ZADH2
GO:0006220	pyrimidine_nucleotide_metabolic_process	Biological Process	9	63	1086	18342	0.0114602	0.233108	1.94081	2.41279	0.00828729	CAD//CTPS1//CTPS2//DHODH//MBD4//NMRK1//TYMS//UCK2//UNG
GO:1901987	regulation_of_cell_cycle_phase_transition	Biological Process	37	423	1086	18342	0.011479	0.233108	1.9401	1.47733	0.03407	BLM//BRCA1//BRCC3//CDK5RAP2//CDK5RAP3//CDK6//CDT1//CEP192//CEP250//CEP57//CHMP4C//CNOT6L//CNTRL//DONSON//DTL//FANCI//HAUS4//KNTC1//MECP2//MRE11//NAE1//NOP53//ODF2//PCM1//PRKDC//PSME1//RBL1//RCC2//RDX//RNASEH2B//SDCCAG8//STOX1//TFAP4//TPR//TPRA1//TRIP13//XPC
GO:0007018	microtubule-based_movement	Biological Process	27	287	1086	18342	0.011876	0.239379	1.92533	1.58891	0.0248619	AP3S2//ARMC4//BLOC1S4//CLUAP1//COPG1//DNAAF5//DPCD//IFT172//IFT57//IFT74//IFT80//IFT81//KIF15//KIF21A//KIFC3//KLC1//LRPPRC//MYH9//MYO19//MYO1C//MYO5C//PCM1//PEX14//PRKCZ//RHOT1//SPAG16//WDR34
GO:0002230	positive_regulation_of_defense_response_to_virus_by_host	Biological Process	5	24	1086	18342	0.0119327	0.239379	1.92326	3.51865	0.00460405	DTX3L//IL23A//MAVS//TRAF3IP2//TRIM44
GO:0006144	purine_nucleobase_metabolic_process	Biological Process	5	24	1086	18342	0.0119327	0.239379	1.92326	3.51865	0.00460405	AOX1//GMPS//MTHFD1//MTHFD1L//PRTFDC1
GO:0000731	DNA_synthesis_involved_in_DNA_repair	Biological Process	8	53	1086	18342	0.0121484	0.242724	1.91548	2.54936	0.00736648	BLM//DTL//PCLAF//POLD2//POLD3//PRIMPOL//USP10//WRN
GO:0009069	serine_family_amino_acid_metabolic_process	Biological Process	7	43	1086	18342	0.0124157	0.243684	1.90603	2.74945	0.00644567	AHCY//CBS//CBSL//MTHFD1//SARS//SHMT2//SRR
GO:0032869	cellular_response_to_insulin_stimulus	Biological Process	17	158	1086	18342	0.0124603	0.243684	1.90447	1.81722	0.0156538	ATP6V1E2//BAIAP2L2//C2CD5//CYFIP1//EEF2K//IGFBP1//KAT2B//PCK2//PRKCZ//PRKDC//RPS6KB1//SHC1//SP1//SRSF5//TRIB3//VAMP2//XBP1
GO:0006266	DNA_ligation	Biological Process	4	16	1086	18342	0.0125407	0.243684	1.90168	4.22238	0.00368324	APTX//LIG1//MGMT//XRCC1
GO:0006744	ubiquinone_biosynthetic_process	Biological Process	4	16	1086	18342	0.0125407	0.243684	1.90168	4.22238	0.00368324	COQ4//COQ7//COQ9//UBIAD1
GO:0015936	coenzyme_A_metabolic_process	Biological Process	4	16	1086	18342	0.0125407	0.243684	1.90168	4.22238	0.00368324	ACAT1//DCAKD//MCCC2//PPCS
GO:0016446	somatic_hypermutation_of_immunoglobulin_genes	Biological Process	4	16	1086	18342	0.0125407	0.243684	1.90168	4.22238	0.00368324	EXO1//MLH1//POLL//UNG
GO:1903392	negative_regulation_of_adherens_junction_organization	Biological Process	4	16	1086	18342	0.0125407	0.243684	1.90168	4.22238	0.00368324	DMTN//PHLDB2//RCC2//RDX
GO:0015833	peptide_transport	Biological Process	107	1464	1086	18342	0.0127585	0.246948	1.8942	1.23441	0.0985267	ACOT4//AGK//AP1M2//AP3S2//ARHGAP1//ARL14//ATP6V1E2//BBS1//C2CD5//CEP57//CHCHD4//CHMP3//CHMP4C//CLIP1//CLTCL1//COG1//COG4//COG8//COPA//COPG1//COPZ1//COPZ2//CPSF4//DGKD//DHRS4//DMTN//DTX3L//EHHADH//EIF2D//EPHX2//EVI5L//EXOC4//FIP1L1//GLE1//HDAC6//HERPUD1//HGS//HMGCL//HSP90B1//IMMP2L//IPO7//IPO9//LARS//LRSAM1//LTBP4//MTX3//MYH9//MYO1C//NASP//NOP53//NUP107//NUP210//NUP62//OXA1L//PEX1//PEX14//PMM1//PO…
GO:0009451	RNA_modification	Biological Process	17	159	1086	18342	0.0132089	0.249825	1.87913	1.8058	0.0156538	AARS//ADARB1//ADAT2//DUS3L//EMG1//LRPPRC//METTL8//MRM1//MTFMT//NAT10//NOP56//PUS7//PUS7L//QTRT1//TARBP1//THG1L//TRMT13
GO:0006268	DNA_unwinding_involved_in_DNA_replication	Biological Process	3	9	1086	18342	0.0132796	0.249825	1.87681	5.62983	0.00276243	MCM2//MCM4//MCM6
GO:0006573	valine_metabolic_process	Biological Process	3	9	1086	18342	0.0132796	0.249825	1.87681	5.62983	0.00276243	ALDH6A1//HIBADH//STAT5B
GO:0032819	positive_regulation_of_natural_killer_cell_proliferation	Biological Process	3	9	1086	18342	0.0132796	0.249825	1.87681	5.62983	0.00276243	IL18//IL23A//STAT5B
GO:0046487	glyoxylate_metabolic_process	Biological Process	3	9	1086	18342	0.0132796	0.249825	1.87681	5.62983	0.00276243	GRHPR//HOGA1//IDH2
GO:0046951	ketone_body_biosynthetic_process	Biological Process	3	9	1086	18342	0.0132796	0.249825	1.87681	5.62983	0.00276243	AACS//ACAT1//HMGCL
GO:0048478	replication_fork_protection	Biological Process	3	9	1086	18342	0.0132796	0.249825	1.87681	5.62983	0.00276243	BLM//DONSON//TIMELESS
GO:0051726	regulation_of_cell_cycle	Biological Process	91	1222	1086	18342	0.0133106	0.249825	1.8758	1.25773	0.0837937	ADARB1//ASNS//ATR//BARD1//BLM//BRCA1//BRCC3//BRIP1//CBX5//CDK5RAP2//CDK5RAP3//CDK6//CDT1//CEP192//CEP250//CEP57//CHMP3//CHMP4C//CNOT6L//CNTRL//DDIT3//DONSON//DTL//EME1//FANCI//FBXO4//FOSL1//HAUS4//HORMAD1//ING4//IPO7//KAT2B//KNTC1//MAP2K5//MAP3K14//MAP3K20//MECP2//MRE11//MYBBP1A//MYBL2//MYO19//NAE1//NANOS3//NLE1//NOP53//NUP62//NUPR1//ODF2//PCLAF//PCM1//PGGT1B//PHC3//PKP4//POC1A//PPP1R15A//PRKDC//…
GO:0016071	mRNA_metabolic_process	Biological Process	56	700	1086	18342	0.0134359	0.251046	1.87173	1.35116	0.0515654	ADARB1//AGO4//ARL6IP4//BUD13//CEBPG//CLNS1A//CNOT6L//CPSF4//CPSF6//DCP1B//DDIT3//DDX42//DHX35//DIS3L//EXOSC5//EXOSC6//EXOSC7//EXOSC8//FIP1L1//GCFC2//GEMIN5//GTF2H3//LSM8//LUC7L3//MBNL3//MLH1//MOV10//MRTO4//NCBP3//NOL3//PAN2//PDCD7//PNN//POLR2D//PPP1R8//PRPF6//PSIP1//PTCD2//RAVER1//RAVER2//RBBP6//RBFOX2//RBM5//RPL10A//RPL12//RPL14//RPL3//RPL4//SRRM2//SRSF2//SRSF5//TSEN2//TTF2//UPF3A//ZCCHC8//ZRANB2
GO:0042254	ribosome_biogenesis	Biological Process	27	290	1086	18342	0.0134769	0.251046	1.87041	1.57247	0.0248619	DIS3L//EMG1//EXOSC5//EXOSC6//EXOSC7//EXOSC8//FBXW9//LAS1L//MRM1//MRTO4//MTERF3//NAT10//NLE1//NOB1//NOLC1//NOP53//NOP56//RBFA//RIOX2//RPL10A//RPL12//RPL14//RPL3//RRP1//TARBP1//UTP20//WDR43
GO:0006312	mitotic_recombination	Biological Process	5	25	1086	18342	0.014205	0.260689	1.84756	3.3779	0.00460405	ERCC1//MSH3//RAD51D//XRCC1//XRCC2
GO:0018126	protein_hydroxylation	Biological Process	5	25	1086	18342	0.014205	0.260689	1.84756	3.3779	0.00460405	ASPH//CRTAP//P4HTM//VIPAS39//VPS33B
GO:0021591	ventricular_system_development	Biological Process	5	25	1086	18342	0.014205	0.260689	1.84756	3.3779	0.00460405	ANP32B//ARMC4//CDK6//DPCD//MECP2
GO:0046755	viral_budding	Biological Process	5	25	1086	18342	0.014205	0.260689	1.84756	3.3779	0.00460405	CHMP3//CHMP4C//LRSAM1//MITD1//TSG101
GO:0044770	cell_cycle_phase_transition	Biological Process	25	265	1086	18342	0.0145892	0.266751	1.83597	1.59335	0.0230203	CDK5RAP2//CDK6//CDT1//CEP192//CEP250//CEP57//CNTRL//DHFR//HAUS4//IQGAP3//MCM2//MCM3//MCM4//MCM5//MCM6//NASP//ODF2//PCM1//PRIM1//RPS6KB1//RRM2//SDCCAG8//SKP2//TIMELESS//TYMS
GO:0030705	cytoskeleton-dependent_intracellular_transport	Biological Process	17	161	1086	18342	0.0148116	0.269821	1.8294	1.78336	0.0156538	AP3S2//BLOC1S4//CLUAP1//COPG1//IFT172//IFT57//IFT74//IFT80//IFT81//LRPPRC//MYO19//MYO1C//PCM1//PEX14//PRKCZ//RHOT1//WDR34
GO:0000723	telomere_maintenance	Biological Process	12	100	1086	18342	0.0149871	0.272019	1.82428	2.02674	0.0110497	BLM//ERCC1//EXO1//MRE11//POLD2//POLD3//PRIM1//PRKDC//RAD51D//TELO2//WRN//XRCC1
GO:0006284	base-excision_repair	Biological Process	9	66	1086	18342	0.0153215	0.277072	1.8147	2.30311	0.00828729	LIG1//MBD4//MRE11//POLL//UNG//USP36//WRN//XPA//XRCC1
GO:0002566	somatic_diversification_of_immune_receptors_via_somatic_mutation	Biological Process	4	17	1086	18342	0.0156452	0.277857	1.80562	3.974	0.00368324	EXO1//MLH1//POLL//UNG
GO:0006743	ubiquinone_metabolic_process	Biological Process	4	17	1086	18342	0.0156452	0.277857	1.80562	3.974	0.00368324	COQ4//COQ7//COQ9//UBIAD1
GO:0042088	T-helper_1_type_immune_response	Biological Process	4	17	1086	18342	0.0156452	0.277857	1.80562	3.974	0.00368324	IL18//IL18BP//RELB//STAT6
GO:0042559	pteridine-containing_compound_biosynthetic_process	Biological Process	4	17	1086	18342	0.0156452	0.277857	1.80562	3.974	0.00368324	ATIC//DHFR//MTHFD1//MTHFD1L
GO:0045190	isotype_switching	Biological Process	4	17	1086	18342	0.0156452	0.277857	1.80562	3.974	0.00368324	ERCC1//EXO1//EXOSC6//MLH1
GO:0090503	RNA_phosphodiester_bond_hydrolysis,_exonucleolytic	Biological Process	7	45	1086	18342	0.015791	0.279444	1.80159	2.62726	0.00644567	CNOT6L//DIS3L//EXOSC5//EXOSC6//EXOSC7//EXOSC8//PAN2
GO:0046390	ribose_phosphate_biosynthetic_process	Biological Process	21	214	1086	18342	0.0159965	0.281147	1.79598	1.65738	0.019337	ACAT1//ACSL5//ATIC//ATP5S//CAD//CTPS1//CTPS2//DCAKD//DHODH//DHTKD1//GMPS//NMRK1//NPR1//PAPSS2//PFAS//PFKL//PPCS//PRTFDC1//SLC25A13//SLC26A2//UCK2
GO:0034613	cellular_protein_localization	Biological Process	108	1492	1086	18342	0.0160007	0.281147	1.79586	1.22256	0.0994475	ACOT4//AGK//AGRN//AP1M2//AP3S2//ARL14//ATR//BARD1//BBS1//C2CD5//CCDC14//CEP192//CEP250//CEP57//CEP68//CHAMP1//CHCHD4//CLIP1//CLTCL1//CNTLN//COPA//COPG1//COPZ1//COPZ2//CPSF4//DDIT3//DHRS4//EHHADH//EIF2D//EPHX2//EVI5L//EXOC4//FIP1L1//FLOT2//GBP1//GLE1//HDAC6//HERPUD1//HGS//HMGCL//HSP90B1//IKBKB//IMMP2L//IPO7//IPO9//KIAA0753//LARS//LRSAM1//MTX3//MYO1C//NOP53//NUP107//NUP210//NUP62//PCM1//PEX1//PEX14…
GO:0009314	response_to_radiation	Biological Process	37	433	1086	18342	0.0160957	0.281297	1.79329	1.44321	0.03407	ASNS//ATR//BLM//BRCA1//BRCC3//CARD16//CIRBP//CLK2//DEAF1//DTL//ERCC1//FBXO4//FECH//GNA11//MAP3K20//MBD4//MECP2//MGMT//MTA1//NUCKS1//OPN3//PCLAF//PER3//PRIMPOL//PRKDC//RAD18//RAD51AP1//RAD51D//RAD54L//RRM1//SCARA3//SMC1A//USP28//WRN//XPA//XPC//XRCC2
GO:0007041	lysosomal_transport	Biological Process	12	101	1086	18342	0.0161228	0.281297	1.79256	2.00667	0.0110497	C9orf72//CHMP3//DTX3L//HGS//HGSNAT//LARS//TSG101//VIPAS39//VPS11//VPS33B//VPS39//VPS52
GO:0016070	RNA_metabolic_process	Biological Process	239	3567	1086	18342	0.0164253	0.284923	1.78449	1.13165	0.220074	AARS//ADARB1//ADAT2//AGO4//AIMP1//ANKRD1//ARGLU1//ARL6IP4//ARNTL2//ASF1B//ATAD2//ATXN2//BORCS8-MEF2B//BRCA1//BRD9//BUD13//CCDC85B//CDCA7//CDCA7L//CEBPG//CHAF1B//CITED4//CLNS1A//CNOT6L//COMMD6//CPSF4//CPSF6//CREB3L4//DARS//DCP1B//DDIT3//DDX42//DDX50//DEAF1//DHX35//DIS3L//DTD1//DUS3L//E2F3//EID2B//EIF4A2//ELK4//EMG1//EXO1//EXOSC5//EXOSC6//EXOSC7//EXOSC8//FARSB//FBXW9//FIP1L1//FLII//FOSL1//FSTL3//GA…
GO:0032088	negative_regulation_of_NF-kappaB_transcription_factor_activity	Biological Process	10	78	1086	18342	0.0164456	0.284923	1.78395	2.16532	0.0092081	ANXA4//CDK5RAP3//COMMD6//IRAK3//MAP2K5//PARP10//RBCK1//RWDD3//SETD6//UFL1
GO:0010948	negative_regulation_of_cell_cycle_process	Biological Process	27	295	1086	18342	0.0165269	0.285333	1.78181	1.54582	0.0248619	BLM//BRCA1//BRCC3//CBX5//CDK5RAP2//CDK5RAP3//CDT1//CHMP4C//CNOT6L//DONSON//DTL//FANCI//HORMAD1//KAT2B//MRE11//NAE1//NOP53//PHC3//PRKDC//RBL1//RRM2//SMC1A//TFAP4//TOM1L1//TPR//TPRA1//TRIP13
GO:0016072	rRNA_metabolic_process	Biological Process	22	228	1086	18342	0.0166265	0.286057	1.7792	1.62969	0.0202578	DIS3L//EMG1//EXOSC5//EXOSC6//EXOSC7//EXOSC8//FBXW9//GTF3C3//LAS1L//MRM1//MRTO4//NAT10//NOB1//NOLC1//NOP56//RBFA//RPL10A//RPL14//RRP1//TARBP1//UTP20//WDR43
GO:0000469	cleavage_involved_in_rRNA_processing	Biological Process	5	26	1086	18342	0.0167505	0.287194	1.77597	3.24798	0.00460405	EXOSC7//EXOSC8//LAS1L//NOB1//UTP20
GO:0072594	establishment_of_protein_localization_to_organelle	Biological Process	36	421	1086	18342	0.0172448	0.294648	1.76334	1.44423	0.0331492	ACOT4//AGK//CEP57//CHCHD4//DDIT3//DHRS4//EHHADH//EPHX2//HGS//HMGCL//IMMP2L//IPO7//IPO9//LARS//LRSAM1//MTX3//NUP107//NUP62//PEX1//PEX14//PMM1//RAB3GAP2//RPAIN//RPL10A//RPL12//RPL14//RPL3//RPL4//RYR2//SLC25A6//TIMM10B//TIMM9//TOMM20//TPR//TSC2//VPS36
GO:0007017	microtubule-based_process	Biological Process	55	696	1086	18342	0.0176743	0.297546	1.75266	1.33466	0.0506446	AP3S2//ARMC4//BLOC1S4//BRCA1//CDK5RAP2//CEP192//CEP250//CEP57//CEP68//CLIP1//CLUAP1//CNTLN//COPG1//DNAAF5//DPCD//HAUS4//IFT172//IFT57//IFT74//IFT80//IFT81//KIAA0753//KIF15//KIF21A//KIFC3//KLC1//LRPPRC//LRRCC1//MECP2//MLH1//MYBL2//MYH9//MYO19//MYO1C//MYO5C//NUP62//ODF2//PCLAF//PCM1//PEX1//PEX14//PHLDB2//POC1A//PRKCZ//RHOT1//SDCCAG8//SPAG16//TBCD//TPGS1//TUBB6//TUBGCP5//WASHC5//WDR34//WDR73//XRCC2
GO:0051053	negative_regulation_of_DNA_metabolic_process	Biological Process	15	139	1086	18342	0.0177277	0.297546	1.75135	1.82261	0.0138122	ANKRD1//ATR//BLM//CDAN1//DONSON//ERCC1//MAGEF1//MLH1//MRE11//MSH3//NAT10//RMI2//SMC1A//TIMELESS//XRCC1
GO:0001731	formation_of_translation_preinitiation_complex	Biological Process	3	10	1086	18342	0.0181464	0.297546	1.74121	5.06685	0.00276243	EIF2D//EIF2S3//EIF4B
GO:0018026	peptidyl-lysine_monomethylation	Biological Process	3	10	1086	18342	0.0181464	0.297546	1.74121	5.06685	0.00276243	KMT5A//SETD6//SETD7
GO:0075522	IRES-dependent_viral_translational_initiation	Biological Process	3	10	1086	18342	0.0181464	0.297546	1.74121	5.06685	0.00276243	EIF2D//EIF3A//EIF3D
GO:0009124	nucleoside_monophosphate_biosynthetic_process	Biological Process	14	127	1086	18342	0.0181768	0.297546	1.74048	1.86183	0.0128913	ATIC//ATP5S//CAD//DHODH//DHTKD1//GMPS//NDUFA10//NMRK1//PFAS//PFKL//PRTFDC1//SLC25A13//TYMS//UCK2
GO:2000779	regulation_of_double-strand_break_repair	Biological Process	9	68	1086	18342	0.0183783	0.297546	1.73569	2.23538	0.00828729	BLM//DTX3L//MAGEF1//MGMT//NSD2//RAD51AP1//RMI2//SLF2//TIMELESS
GO:0044772	mitotic_cell_cycle_phase_transition	Biological Process	24	257	1086	18342	0.0183972	0.297546	1.73525	1.57723	0.0220994	CDK5RAP2//CDK6//CDT1//CEP192//CEP250//CEP57//CNTRL//DHFR//HAUS4//IQGAP3//MCM2//MCM3//MCM4//MCM5//MCM6//NASP//ODF2//PCM1//PRIM1//RPS6KB1//RRM2//SDCCAG8//SKP2//TYMS
GO:0097327	response_to_antineoplastic_agent	Biological Process	11	91	1086	18342	0.0184151	0.297546	1.73483	2.04159	0.0101289	ASNS//ASS1//BLM//BRCA1//CLDN1//DHFR//FECH//PCK2//RPS6KB1//TFAP4//TIMELESS
GO:0065004	protein-DNA_complex_assembly	Biological Process	21	217	1086	18342	0.018422	0.297546	1.73466	1.63447	0.019337	ANP32B//ASF1B//CDT1//CENPH//CENPK//CENPL//CHAF1A//CHAF1B//GTF2H3//HP1BP3//ITGB3BP//MCM2//NASP//RAD51D//RSF1//TAF12//TSPYL4//UBTF//XPA//XPC//XRCC2
GO:0006333	chromatin_assembly_or_disassembly	Biological Process	17	165	1086	18342	0.0184684	0.297546	1.73357	1.74013	0.0156538	ANP32B//ASF1B//CDAN1//CENPH//CENPK//CENPL//CHAF1A//CHAF1B//GATAD1//HP1BP3//ITGB3BP//MCM2//NASP//RSF1//SMARCE1//SUPT16H//TSPYL4
GO:0032200	telomere_organization	Biological Process	12	103	1086	18342	0.0185874	0.297546	1.73078	1.96771	0.0110497	BLM//ERCC1//EXO1//MRE11//POLD2//POLD3//PRIM1//PRKDC//RAD51D//TELO2//WRN//XRCC1
GO:0010970	transport_along_microtubule	Biological Process	15	140	1086	18342	0.0188079	0.297546	1.72566	1.80959	0.0138122	AP3S2//BLOC1S4//CLUAP1//COPG1//IFT172//IFT57//IFT74//IFT80//IFT81//LRPPRC//PCM1//PEX14//PRKCZ//RHOT1//WDR34
GO:0000712	resolution_of_meiotic_recombination_intermediates	Biological Process	4	18	1086	18342	0.0191924	0.297546	1.71687	3.75322	0.00368324	BLM//EME1//MLH1//MSH5
GO:0046599	regulation_of_centriole_replication	Biological Process	4	18	1086	18342	0.0191924	0.297546	1.71687	3.75322	0.00368324	BRCA1//CDK5RAP2//KAT2B//NUP62
GO:0071025	RNA_surveillance	Biological Process	4	18	1086	18342	0.0191924	0.297546	1.71687	3.75322	0.00368324	EXOSC5//EXOSC6//EXOSC7//EXOSC8
GO:0032868	response_to_insulin	Biological Process	21	218	1086	18342	0.0192913	0.297546	1.71464	1.62697	0.019337	ATP6V1E2//BAIAP2L2//C2CD5//CAD//CYFIP1//EEF2K//EPM2AIP1//IGFBP1//KAT2B//OGT//PCK2//PRKCZ//PRKDC//RPS6KB1//SESN2//SHC1//SP1//SRSF5//TRIB3//VAMP2//XBP1
GO:0000451	rRNA_2'-O-methylation	Biological Process	2	4	1086	18342	0.0193961	0.297546	1.71229	8.44475	0.00184162	MRM1//TARBP1
GO:0000710	meiotic_mismatch_repair	Biological Process	2	4	1086	18342	0.0193961	0.297546	1.71229	8.44475	0.00184162	ERCC1//MSH3
GO:0006574	valine_catabolic_process	Biological Process	2	4	1086	18342	0.0193961	0.297546	1.71229	8.44475	0.00184162	ALDH6A1//HIBADH
GO:0010847	regulation_of_chromatin_assembly	Biological Process	2	4	1086	18342	0.0193961	0.297546	1.71229	8.44475	0.00184162	PARP10//TPR
GO:0019344	cysteine_biosynthetic_process	Biological Process	2	4	1086	18342	0.0193961	0.297546	1.71229	8.44475	0.00184162	CBS//CBSL
GO:0019346	transsulfuration	Biological Process	2	4	1086	18342	0.0193961	0.297546	1.71229	8.44475	0.00184162	CBS//MTHFD1
GO:0019626	short-chain_fatty_acid_catabolic_process	Biological Process	2	4	1086	18342	0.0193961	0.297546	1.71229	8.44475	0.00184162	MCEE//PCK2
GO:0031427	response_to_methotrexate	Biological Process	2	4	1086	18342	0.0193961	0.297546	1.71229	8.44475	0.00184162	ASNS//DHFR
GO:0044860	protein_localization_to_plasma_membrane_raft	Biological Process	2	4	1086	18342	0.0193961	0.297546	1.71229	8.44475	0.00184162	CLIP1//FLOT2
GO:0045950	negative_regulation_of_mitotic_recombination	Biological Process	2	4	1086	18342	0.0193961	0.297546	1.71229	8.44475	0.00184162	BLM//MLH1
GO:0051598	meiotic_recombination_checkpoint	Biological Process	2	4	1086	18342	0.0193961	0.297546	1.71229	8.44475	0.00184162	HORMAD1//TRIP13
GO:0061819	telomeric_DNA-containing_double_minutes_formation	Biological Process	2	4	1086	18342	0.0193961	0.297546	1.71229	8.44475	0.00184162	ERCC1//XRCC1
GO:0070213	protein_auto-ADP-ribosylation	Biological Process	2	4	1086	18342	0.0193961	0.297546	1.71229	8.44475	0.00184162	PARP10//PARP16
GO:0071500	cellular_response_to_nitrosative_stress	Biological Process	2	4	1086	18342	0.0193961	0.297546	1.71229	8.44475	0.00184162	DDIT3//STOX1
GO:1903373	positive_regulation_of_endoplasmic_reticulum_tubular_network_organization	Biological Process	2	4	1086	18342	0.0193961	0.297546	1.71229	8.44475	0.00184162	ATL3//RAB3GAP2
GO:1905765	negative_regulation_of_protection_from_non-homologous_end_joining_at_telomere	Biological Process	2	4	1086	18342	0.0193961	0.297546	1.71229	8.44475	0.00184162	ERCC1//XRCC1
GO:0007143	female_meiotic_nuclear_division	Biological Process	5	27	1086	18342	0.0195813	0.29854	1.70816	3.12769	0.00460405	MLH1//MLH3//SYCP2//TRIP13//WASHC5
GO:1904292	regulation_of_ERAD_pathway	Biological Process	5	27	1086	18342	0.0195813	0.29854	1.70816	3.12769	0.00460405	DERL3//HERPUD1//UBE2G2//USP13//USP25
GO:0007140	male_meiotic_nuclear_division	Biological Process	7	47	1086	18342	0.0197701	0.300493	1.70399	2.51546	0.00644567	AGO4//FANCA//MLH1//MLH3//SYCP2//TDRD9//TRIP13
GO:0071103	DNA_conformation_change	Biological Process	24	259	1086	18342	0.0200062	0.303152	1.69884	1.56505	0.0220994	ANP32B//ASF1B//BLM//BRIP1//CDAN1//CENPH//CENPK//CENPL//CHAF1A//CHAF1B//GATAD1//GINS2//HP1BP3//ITGB3BP//MCM2//MCM4//MCM6//MRE11//NASP//NCAPG2//RAD54L//RSF1//TSPYL4//WRN
GO:0009116	nucleoside_metabolic_process	Biological Process	14	129	1086	18342	0.0205534	0.310495	1.68712	1.83297	0.0128913	AHCY//ATIC//CAD//CTPS1//CTPS2//DERA//DHODH//GMPS//MACROD1//MOCOS//NMRK1//OARD1//PRTFDC1//UCK2
GO:0016032	viral_process	Biological Process	47	585	1086	18342	0.0207035	0.311811	1.68396	1.35693	0.0432781	AP1M2//AXL//CBX5//CHMP3//CHMP4C//CLDN1//CLDN9//CPSF4//EIF2D//EIF3A//EIF3D//EIF3L//EIF4A2//FAM111A//IPO7//KAT2B//KLC1//KRT7//LRSAM1//MAVS//MITD1//MRE11//NFX1//NLRP1//NUCKS1//NUP107//NUP210//NUP62//PAAF1//PSIP1//PSMB10//PSMB9//RBCK1//RBL1//SHC1//SLC25A6//SP1//TNFRSF14//TPR//TSC2//TSG101//TYMS//UNG//VIM//VRK2//ZC3H7B//ZMYND11
GO:0032259	methylation	Biological Process	27	301	1086	18342	0.020885	0.313591	1.68017	1.51501	0.0248619	AHCY//COMTD1//DPH5//EEF1AKMT1//EEF2KMT//EMG1//FAM86B1//FAM86B2//KMT5A//MECP2//METTL18//METTL8//MGMT//MRM1//MTR//NSD2//OGT//PCMTD1//PRMT3//SETD6//SETD7//SPOUT1//TARBP1//TDRD9//TRMT13//TYMS//WDR5
GO:0010608	posttranscriptional_regulation_of_gene_expression	Biological Process	51	644	1086	18342	0.0209796	0.314061	1.6782	1.33752	0.0469613	AGO4//ATXN2//CIRBP//CNOT6L//CYFIP1//DHFR//DPH5//DPH7//EEF2//EEFSEC//EIF2AK1//EIF3D//EIF4A2//EIF4B//EXOSC5//EXOSC6//EXOSC7//EXOSC8//FAM129A//FBXO4//GEMIN5//GLE1//IGF2BP3//LRPPRC//LSM14B//MAPKAPK5//MOV10//MRPS27//MTIF2//NANOS3//NCL//NOLC1//PABPC4//POLR2D//PPP1R15A//PPP1R8//RBM3//RBMS3//RMND1//RPS6KB1//SESN2//SHMT2//SPOUT1//TIA1//TPR//TRAP1//TYMS//UPF3A//USP16//VIM//ZC3H7B
GO:0006221	pyrimidine_nucleotide_biosynthetic_process	Biological Process	7	48	1086	18342	0.022001	0.327372	1.65756	2.46305	0.00644567	CAD//CTPS1//CTPS2//DHODH//NMRK1//TYMS//UCK2
GO:1900024	regulation_of_substrate_adhesion-dependent_cell_spreading	Biological Process	7	48	1086	18342	0.022001	0.327372	1.65756	2.46305	0.00644567	DMTN//DOCK1//GBP1//LIMS1//RCC2//TACSTD2//WASHC2C
GO:0006626	protein_targeting_to_mitochondrion	Biological Process	8	59	1086	18342	0.0223057	0.330427	1.65159	2.2901	0.00736648	AGK//CHCHD4//IMMP2L//MTX3//SLC25A6//TIMM10B//TIMM9//TOMM20
GO:0031497	chromatin_assembly	Biological Process	15	143	1086	18342	0.0223502	0.330427	1.65072	1.77163	0.0138122	ANP32B//ASF1B//CDAN1//CENPH//CENPK//CENPL//CHAF1A//CHAF1B//GATAD1//HP1BP3//ITGB3BP//MCM2//NASP//RSF1//TSPYL4
GO:0071897	DNA_biosynthetic_process	Biological Process	13	118	1086	18342	0.0224063	0.330427	1.64963	1.86071	0.0119705	BLM//DTL//LIG1//MRE11//MYBBP1A//PCLAF//POLD2//POLD3//POLL//PRIMPOL//TYMS//USP10//WRN
GO:0043603	cellular_amide_metabolic_process	Biological Process	312	4783	1086	18342	0.0226156	0.3308	1.64559	1.10172	0.287293	AARS//ACAT1//ACOT4//ACSL5//ACSM3//ACY1//ADAMTS16//ADH5//AFG3L2//AGK//AIMP1//ALDH1L2//ALDH5A1//ALG10B//ANAPC16//APOL6//ASNS//ASPH//ASPHD1//ASS1//ATIC//ATR//AXL//B4GALNT2//BACE2//BARD1//BRCA1//BRCC3//C1RL//C4BPB//CAD//CAMKK1//CAMKK2//CASP1//CASP4//CCNB1IP1//CDC42BPB//CDK5RAP3//CDK6//CHCHD4//CHMP4C//CLK2//CNTRL//CRTAP//CSF2RA//CSGALNACT1//DARS//DCAF10//DCAF8//DDIT3//DERL3//DESI1//DHFR//DNAJB12//DPH5…
GO:0006379	mRNA_cleavage	Biological Process	5	28	1086	18342	0.0227083	0.3308	1.64382	3.01598	0.00460405	AGO4//CPSF4//CPSF6//FIP1L1//MOV10
GO:0045910	negative_regulation_of_DNA_recombination	Biological Process	5	28	1086	18342	0.0227083	0.3308	1.64382	3.01598	0.00460405	BLM//MAGEF1//MLH1//MSH3//RMI2
GO:1900027	regulation_of_ruffle_assembly	Biological Process	5	28	1086	18342	0.0227083	0.3308	1.64382	3.01598	0.00460405	CYFIP1//EPS8L2//RCC2//RDX//TACSTD2
GO:0070507	regulation_of_microtubule_cytoskeleton_organization	Biological Process	18	182	1086	18342	0.0227655	0.3308	1.64272	1.67039	0.0165746	BRCA1//CDK5RAP2//CEP250//CHMP3//CHMP4C//CLIP1//EML2//HDAC6//KAT2B//MECP2//NUP62//PHLDB2//POC1A//RASSF1//SENP6//SMC1A//TBCD//TPR
GO:0034508	centromere_complex_assembly	Biological Process	6	38	1086	18342	0.0230778	0.333172	1.63681	2.66676	0.00552486	CENPH//CENPK//CENPL//ITGB3BP//NASP//RSF1
GO:0032816	positive_regulation_of_natural_killer_cell_activation	Biological Process	4	19	1086	18342	0.0231976	0.333172	1.63456	3.55568	0.00368324	AXL//IL18//IL23A//STAT5B
GO:0043649	dicarboxylic_acid_catabolic_process	Biological Process	4	19	1086	18342	0.0231976	0.333172	1.63456	3.55568	0.00368324	ACOT4//ALDH1L2//ALDH5A1//PM20D2
GO:0070129	regulation_of_mitochondrial_translation	Biological Process	4	19	1086	18342	0.0231976	0.333172	1.63456	3.55568	0.00368324	LRPPRC//MRPS27//RMND1//SHMT2
GO:0033036	macromolecule_localization	Biological Process	162	2363	1086	18342	0.0234443	0.33412	1.62996	1.15789	0.149171	ABCC3//ACOT4//AGK//AGRN//AKAP7//AP1M2//AP3S2//APOL6//ARHGAP1//ARL14//ARV1//ATP6V1E2//ATP9A//ATR//ATXN2//BARD1//BBS1//C2CD5//CBY1//CCDC14//CDAN1//CEP192//CEP250//CEP57//CEP68//CHAMP1//CHCHD4//CHMP3//CHMP4C//CLIP1//CLTCL1//CNTLN//COG1//COG4//COG8//COPA//COPG1//COPZ1//COPZ2//CPSF4//DDIT3//DDX42//DGKD//DHRS4//DLG5//DMTN//DTX3L//EHHADH//EIF2D//EPHX2//ESYT2//EVI5L//EXOC4//FIP1L1//FLOT2//GBP1//GLE1//HDA…
GO:0042886	amide_transport	Biological Process	107	1499	1086	18342	0.0234584	0.33412	1.6297	1.20559	0.0985267	ACOT4//AGK//AP1M2//AP3S2//ARHGAP1//ARL14//ATP6V1E2//BBS1//C2CD5//CEP57//CHCHD4//CHMP3//CHMP4C//CLIP1//CLTCL1//COG1//COG4//COG8//COPA//COPG1//COPZ1//COPZ2//CPSF4//DGKD//DHRS4//DMTN//DTX3L//EHHADH//EIF2D//EPHX2//EVI5L//EXOC4//FIP1L1//GLE1//HDAC6//HERPUD1//HGS//HMGCL//HSP90B1//IMMP2L//IPO7//IPO9//LARS//LRSAM1//LTBP4//MTX3//MYH9//MYO1C//NASP//NOP53//NUP107//NUP210//NUP62//OXA1L//PEX1//PEX14//PMM1//PO…
GO:0006188	IMP_biosynthetic_process	Biological Process	3	11	1086	18342	0.0238705	0.33412	1.62214	4.60623	0.00276243	ATIC//PFAS//PRTFDC1
GO:0015937	coenzyme_A_biosynthetic_process	Biological Process	3	11	1086	18342	0.0238705	0.33412	1.62214	4.60623	0.00276243	ACAT1//DCAKD//PPCS
GO:0032817	regulation_of_natural_killer_cell_proliferation	Biological Process	3	11	1086	18342	0.0238705	0.33412	1.62214	4.60623	0.00276243	IL18//IL23A//STAT5B
GO:0042984	regulation_of_amyloid_precursor_protein_biosynthetic_process	Biological Process	3	11	1086	18342	0.0238705	0.33412	1.62214	4.60623	0.00276243	BACE2//NECAB2//PAWR
GO:0045003	double-strand_break_repair_via_synthesis-dependent_strand_annealing	Biological Process	3	11	1086	18342	0.0238705	0.33412	1.62214	4.60623	0.00276243	BLM//RAD51D//XRCC2
GO:0046950	cellular_ketone_body_metabolic_process	Biological Process	3	11	1086	18342	0.0238705	0.33412	1.62214	4.60623	0.00276243	AACS//ACAT1//HMGCL
GO:0051593	response_to_folic_acid	Biological Process	3	11	1086	18342	0.0238705	0.33412	1.62214	4.60623	0.00276243	EEF2//MGMT//TYMS
GO:0018193	peptidyl-amino_acid_modification	Biological Process	69	918	1086	18342	0.0240019	0.335012	1.61975	1.26947	0.0635359	ADH5//ASPH//ASPHD1//ATR//AXL//B4GALNT2//CAD//CAMKK1//CAMKK2//CHCHD4//CLK2//CNTRL//CRTAP//CSF2RA//DERL3//DPH5//DPH7//DPM3//EEF1AKMT1//EEF2KMT//EP400//FGF2//FKBP10//FKBP5//FKBP9//HDAC6//IKBKB//ING4//ING5//KAT2B//KMT5A//LOXL4//MAP2K5//MAPKAPK5//MECP2//METAP1D//MST1R//NSD2//NUAK2//OGT//P4HTM//PHF10//PHF20//PKN3//PRKCZ//PRKDC//PRMT3//PSKH1//RIOX2//RPS6KB1//RSF1//SENP6//SETD6//SETD7//ST3GAL3//ST6GALNAC…
GO:0046605	regulation_of_centrosome_cycle	Biological Process	8	60	1086	18342	0.0244485	0.340288	1.61175	2.25193	0.00736648	BRCA1//CDK5RAP2//CEP250//CHMP3//CHMP4C//KAT2B//NUP62//POC1A
GO:0042594	response_to_starvation	Biological Process	18	184	1086	18342	0.0250896	0.348232	1.60051	1.65223	0.0165746	AACS//ACAT1//ASNS//CAD//DDIT3//DHODH//EIF2AK1//FADS1//HMGCL//LARS//MYBBP1A//NUAK2//PCK2//SESN2//TBL2//ULK2//WRN//XBP1
GO:0032886	regulation_of_microtubule-based_process	Biological Process	20	211	1086	18342	0.0256469	0.354973	1.59096	1.6009	0.0184162	ARMC4//BRCA1//CDK5RAP2//CEP250//CHMP3//CHMP4C//CLIP1//EML2//HDAC6//KAT2B//MECP2//NUP62//PHLDB2//POC1A//RASSF1//RHOT1//SENP6//SMC1A//TBCD//TPR
GO:0072655	establishment_of_protein_localization_to_mitochondrion	Biological Process	9	72	1086	18342	0.0257804	0.355827	1.58871	2.11119	0.00828729	AGK//CHCHD4//DDIT3//IMMP2L//MTX3//SLC25A6//TIMM10B//TIMM9//TOMM20
GO:0098868	bone_growth	Biological Process	6	39	1086	18342	0.0259518	0.357197	1.58583	2.59839	0.00552486	COL7A1//EVC//LEPR//POC1A//SCARA3//THBS3
GO:0090169	regulation_of_spindle_assembly	Biological Process	5	29	1086	18342	0.0261411	0.358806	1.58268	2.91198	0.00460405	CHMP3//CHMP4C//SENP6//SMC1A//TPR
GO:0051640	organelle_localization	Biological Process	48	609	1086	18342	0.0264288	0.361754	1.57792	1.33119	0.0441989	AP1M2//AP3S2//B9D1//BLOC1S4//CDK5RAP2//CDT1//CEP192//CEP250//CEP57//CEP89//CHAMP1//CHMP3//CHMP4C//CNTRL//COL7A1//COPG1//ESYT2//EXOC4//F8//HAUS4//HDAC6//IQCB1//LRPPRC//MKS1//MLH1//MYH9//MYO19//MYO1C//NOP53//NUP62//ODF2//PCM1//PEX1//PEX14//PRKCZ//RABEPK//RHOT1//SDCCAG8//SPOUT1//STX17//TCTN1//TMED10//TMEM216//TPGS1//TRAPPC6A//VAMP2//VPS11//VPS33B
GO:0097553	calcium_ion_transmembrane_import_into_cytosol	Biological Process	8	61	1086	18342	0.0267314	0.364887	1.57298	2.21502	0.00736648	DDIT3//FGF2//ITPR3//JPH2//NOL3//RASA3//RYR2//TPCN1
GO:0043486	histone_exchange	Biological Process	7	50	1086	18342	0.026973	0.366168	1.56907	2.36453	0.00644567	ANP32B//CENPH//CENPK//CENPL//ITGB3BP//NASP//RSF1
GO:0090329	regulation_of_DNA-dependent_DNA_replication	Biological Process	7	50	1086	18342	0.026973	0.366168	1.56907	2.36453	0.00644567	BLM//CDT1//DONSON//MRE11//MSH3//SMC1A//TIMELESS
GO:0044265	cellular_macromolecule_catabolic_process	Biological Process	66	879	1086	18342	0.0273577	0.370376	1.56292	1.26815	0.0607735	AGO4//ANAPC16//CHMP4C//CNOT6L//DCP1B//DDIT3//DERL3//DIS3L//DNAJB12//DTL//DTX3L//EXOSC5//EXOSC6//EXOSC7//EXOSC8//FBXL16//FBXL20//FBXL4//FBXL5//FBXO4//FBXW4//HDAC6//HERPUD1//HSP90B1//LONP1//MLH1//MRTO4//MTA1//NGLY1//NHLRC3//PABPC4//PAN2//POLR2D//PPP1R8//PSMB10//PSMB9//RBBP6//RBCK1//RNASEH2B//RNF146//RNF165//RPL10A//RPL12//RPL14//RPL3//RPL4//SKP2//SNX5//TATDN1//TMEM129//TOM1L1//TSG101//UBA7//UBE2G2/…
GO:0043162	ubiquitin-dependent_protein_catabolic_process_via_the_multivesicular_body_sorting_pathway	Biological Process	4	20	1086	18342	0.027673	0.371598	1.55794	3.3779	0.00368324	HDAC6//TOM1L1//TSG101//VPS36
GO:0051307	meiotic_chromosome_separation	Biological Process	4	20	1086	18342	0.027673	0.371598	1.55794	3.3779	0.00368324	BLM//EME1//MLH1//MSH5
GO:0071539	protein_localization_to_centrosome	Biological Process	4	20	1086	18342	0.027673	0.371598	1.55794	3.3779	0.00368324	CCDC14//CEP192//KIAA0753//PCM1
GO:0019637	organophosphate_metabolic_process	Biological Process	78	1062	1086	18342	0.02779	0.37216	1.55611	1.24047	0.0718232	ACAT1//ACOT4//ACSL5//ACSM3//AGK//ALDH5A1//ATIC//ATP5S//CAD//COQ7//COQ9//CPNE7//CRYL1//CTPS1//CTPS2//DCAKD//DERA//DGKA//DHODH//DHTKD1//DNPH1//DPM3//FADS1//FGF2//GARS//GFPT1//GK5//GMPS//H6PD//HMGCL//IDH2//MBD4//MCCC2//MCEE//MECP2//MOCOS//MT-ND5//MTHFD1//NAPRT//NDUFA10//NDUFA7//NDUFB1//NDUFB5//NDUFV1//NDUFV3//NMRK1//NPR1//NUDT3//OCRL//OSBPL5//PAPSS2//PARP10//PARP16//PCK2//PDE10A//PFAS//PFKL//PI4K2B/…
GO:0006400	tRNA_modification	Biological Process	10	85	1086	18342	0.0283201	0.37453	1.54791	1.987	0.0092081	AARS//ADAT2//DUS3L//METTL8//MTFMT//NAT10//QTRT1//TARBP1//THG1L//TRMT13
GO:0042775	mitochondrial_ATP_synthesis_coupled_electron_transport	Biological Process	10	85	1086	18342	0.0283201	0.37453	1.54791	1.987	0.0092081	COQ7//COQ9//MECP2//MT-ND5//NDUFA10//NDUFA7//NDUFB1//NDUFB5//NDUFV1//NDUFV3
GO:0006414	translational_elongation	Biological Process	13	122	1086	18342	0.0285605	0.37453	1.54423	1.7997	0.0119705	EEF1B2//EEF2//EEF2K//EEFSEC//GTPBP2//MRPL2//MRPL21//MRPL24//MRPL33//MRPS18B//MRPS25//MRPS27//OXA1L
GO:0002639	positive_regulation_of_immunoglobulin_production	Biological Process	6	40	1086	18342	0.0290539	0.37453	1.5368	2.53343	0.00552486	EXOSC6//MLH1//NSD2//STAT6//UNG//XBP1
GO:0007034	vacuolar_transport	Biological Process	14	135	1086	18342	0.0290908	0.37453	1.53624	1.7515	0.0128913	C9orf72//CHMP3//CHMP4C//DTX3L//HGS//HGSNAT//LARS//TSG101//VIPAS39//VPS11//VPS33B//VPS36//VPS39//VPS52
GO:0036258	multivesicular_body_assembly	Biological Process	5	30	1086	18342	0.029888	0.37453	1.5245	2.81492	0.00460405	CHMP3//CHMP4C//HGS//TSG101//VPS36
GO:0045191	regulation_of_isotype_switching	Biological Process	5	30	1086	18342	0.029888	0.37453	1.5245	2.81492	0.00460405	EXOSC6//MLH1//NSD2//STAT6//UNG
GO:0070536	protein_K63-linked_deubiquitination	Biological Process	5	30	1086	18342	0.029888	0.37453	1.5245	2.81492	0.00460405	BRCC3//SHMT2//USP13//USP16//USP25
GO:1901661	quinone_metabolic_process	Biological Process	5	30	1086	18342	0.029888	0.37453	1.5245	2.81492	0.00460405	CBR3//COQ4//COQ7//COQ9//UBIAD1
GO:0042773	ATP_synthesis_coupled_electron_transport	Biological Process	10	86	1086	18342	0.030413	0.37453	1.51694	1.9639	0.0092081	COQ7//COQ9//MECP2//MT-ND5//NDUFA10//NDUFA7//NDUFB1//NDUFB5//NDUFV1//NDUFV3
GO:0006105	succinate_metabolic_process	Biological Process	3	12	1086	18342	0.0304533	0.37453	1.51637	4.22238	0.00276243	ALDH5A1//STAT5B//SUCLG2
GO:0006107	oxaloacetate_metabolic_process	Biological Process	3	12	1086	18342	0.0304533	0.37453	1.51637	4.22238	0.00276243	NIT2//PCK2//STAT5B
GO:0010826	negative_regulation_of_centrosome_duplication	Biological Process	3	12	1086	18342	0.0304533	0.37453	1.51637	4.22238	0.00276243	BRCA1//CDK5RAP2//KAT2B
GO:0043201	response_to_leucine	Biological Process	3	12	1086	18342	0.0304533	0.37453	1.51637	4.22238	0.00276243	LARS//RPS6KB1//SESN2
GO:0050667	homocysteine_metabolic_process	Biological Process	3	12	1086	18342	0.0304533	0.37453	1.51637	4.22238	0.00276243	AHCY//CBS//MTHFD1
GO:0072425	signal_transduction_involved_in_G2_DNA_damage_checkpoint	Biological Process	3	12	1086	18342	0.0304533	0.37453	1.51637	4.22238	0.00276243	BRCA1//BRCC3//DTL
GO:1902224	ketone_body_metabolic_process	Biological Process	3	12	1086	18342	0.0304533	0.37453	1.51637	4.22238	0.00276243	AACS//ACAT1//HMGCL
GO:1902916	positive_regulation_of_protein_polyubiquitination	Biological Process	3	12	1086	18342	0.0304533	0.37453	1.51637	4.22238	0.00276243	FBXO4//NMI//SKP2
GO:0019439	aromatic_compound_catabolic_process	Biological Process	39	483	1086	18342	0.0306562	0.37453	1.51348	1.36375	0.0359116	ACAT1//AGO4//AHCY//ALDH1L2//AOX1//CNOT6L//DCP1B//DERA//DHTKD1//DIS3L//DNPH1//EPHX2//EXOSC5//EXOSC6//EXOSC7//EXOSC8//HPDL//MAOB//MBD4//MLH1//MRTO4//NUDT3//PABPC4//PAN2//PDE10A//PFKL//PM20D2//POLR2D//PPP1R8//PRTFDC1//RNASEH2B//RPL10A//RPL12//RPL14//RPL3//RPL4//TATDN1//UNG//UPF3A
GO:0001302	replicative_cell_aging	Biological Process	2	5	1086	18342	0.031066	0.37453	1.50772	6.7558	0.00184162	ERCC1//WRN
GO:0006102	isocitrate_metabolic_process	Biological Process	2	5	1086	18342	0.031066	0.37453	1.50772	6.7558	0.00184162	ACO2//IDH2
GO:0006177	GMP_biosynthetic_process	Biological Process	2	5	1086	18342	0.031066	0.37453	1.50772	6.7558	0.00184162	GMPS//PRTFDC1
GO:0006269	DNA_replication,_synthesis_of_RNA_primer	Biological Process	2	5	1086	18342	0.031066	0.37453	1.50772	6.7558	0.00184162	PRIM1//PRIMPOL
GO:0006528	asparagine_metabolic_process	Biological Process	2	5	1086	18342	0.031066	0.37453	1.50772	6.7558	0.00184162	ASNS//NIT2
GO:0006549	isoleucine_metabolic_process	Biological Process	2	5	1086	18342	0.031066	0.37453	1.50772	6.7558	0.00184162	ACAT1//STAT5B
GO:0010044	response_to_aluminum_ion	Biological Process	2	5	1086	18342	0.031066	0.37453	1.50772	6.7558	0.00184162	LONP1//MAOB
GO:0010936	negative_regulation_of_macrophage_cytokine_production	Biological Process	2	5	1086	18342	0.031066	0.37453	1.50772	6.7558	0.00184162	CUEDC2//IRAK3
GO:0019640	glucuronate_catabolic_process_to_xylulose_5-phosphate	Biological Process	2	5	1086	18342	0.031066	0.37453	1.50772	6.7558	0.00184162	CRYL1//SORD
GO:0034553	mitochondrial_respiratory_chain_complex_II_assembly	Biological Process	2	5	1086	18342	0.031066	0.37453	1.50772	6.7558	0.00184162	SDHAF1//SDHAF4
GO:0035279	mRNA_cleavage_involved_in_gene_silencing_by_miRNA	Biological Process	2	5	1086	18342	0.031066	0.37453	1.50772	6.7558	0.00184162	AGO4//MOV10
GO:0042816	vitamin_B6_metabolic_process	Biological Process	2	5	1086	18342	0.031066	0.37453	1.50772	6.7558	0.00184162	AOX1//PNPO
GO:0046452	dihydrofolate_metabolic_process	Biological Process	2	5	1086	18342	0.031066	0.37453	1.50772	6.7558	0.00184162	ATIC//DHFR
GO:0048298	positive_regulation_of_isotype_switching_to_IgA_isotypes	Biological Process	2	5	1086	18342	0.031066	0.37453	1.50772	6.7558	0.00184162	MLH1//NSD2
GO:0051414	response_to_cortisol	Biological Process	2	5	1086	18342	0.031066	0.37453	1.50772	6.7558	0.00184162	CAD//IGFBP7
GO:0051884	regulation_of_timing_of_anagen	Biological Process	2	5	1086	18342	0.031066	0.37453	1.50772	6.7558	0.00184162	FERMT1//SPINK5
GO:1901300	positive_regulation_of_hydrogen_peroxide-mediated_programmed_cell_death	Biological Process	2	5	1086	18342	0.031066	0.37453	1.50772	6.7558	0.00184162	HDAC6//PAWR
GO:1902109	negative_regulation_of_mitochondrial_membrane_permeability_involved_in_apoptotic_process	Biological Process	2	5	1086	18342	0.031066	0.37453	1.50772	6.7558	0.00184162	ACAA2//NOL3
GO:1902774	late_endosome_to_lysosome_transport	Biological Process	2	5	1086	18342	0.031066	0.37453	1.50772	6.7558	0.00184162	C9orf72//VPS39
GO:1903371	regulation_of_endoplasmic_reticulum_tubular_network_organization	Biological Process	2	5	1086	18342	0.031066	0.37453	1.50772	6.7558	0.00184162	ATL3//RAB3GAP2
GO:1904506	negative_regulation_of_telomere_maintenance_in_response_to_DNA_damage	Biological Process	2	5	1086	18342	0.031066	0.37453	1.50772	6.7558	0.00184162	ERCC1//XRCC1
GO:1990592	protein_K69-linked_ufmylation	Biological Process	2	5	1086	18342	0.031066	0.37453	1.50772	6.7558	0.00184162	UFL1//UFM1
GO:0006334	nucleosome_assembly	Biological Process	13	124	1086	18342	0.0320625	0.385607	1.494	1.77067	0.0119705	ANP32B//ASF1B//CENPH//CENPK//CENPL//CHAF1A//CHAF1B//HP1BP3//ITGB3BP//MCM2//NASP//RSF1//TSPYL4
GO:0019985	translesion_synthesis	Biological Process	6	41	1086	18342	0.03239	0.387693	1.48959	2.47163	0.00552486	DTL//PCLAF//POLD2//POLD3//PRIMPOL//USP10
GO:0051028	mRNA_transport	Biological Process	15	150	1086	18342	0.0325418	0.387693	1.48756	1.68895	0.0138122	CPSF4//FIP1L1//GLE1//IGF2BP3//LRPPRC//MYO1C//NCBP3//NUP107//NUP210//NUP62//POLR2D//SRSF2//SRSF5//TPR//UPF3A
GO:0032392	DNA_geometric_change	Biological Process	9	75	1086	18342	0.0325645	0.387693	1.48726	2.02674	0.00828729	BLM//BRIP1//GINS2//MCM2//MCM4//MCM6//MRE11//RAD54L//WRN
GO:0006450	regulation_of_translational_fidelity	Biological Process	4	21	1086	18342	0.0326272	0.387693	1.48642	3.21705	0.00368324	AARS//DTD1//IARS//LARS
GO:0060972	left|right_pattern_formation	Biological Process	4	21	1086	18342	0.0326272	0.387693	1.48642	3.21705	0.00368324	DPCD//IFT172//IFT57//MNS1
GO:0036257	multivesicular_body_organization	Biological Process	5	31	1086	18342	0.0339563	0.400603	1.46908	2.72411	0.00460405	CHMP3//CHMP4C//HGS//TSG101//VPS36
GO:0070059	intrinsic_apoptotic_signaling_pathway_in_response_to_endoplasmic_reticulum_stress	Biological Process	5	31	1086	18342	0.0339563	0.400603	1.46908	2.72411	0.00460405	CASP4//DDIT3//PPP1R15A//TRIB3//XBP1
GO:0071549	cellular_response_to_dexamethasone_stimulus	Biological Process	5	31	1086	18342	0.0339563	0.400603	1.46908	2.72411	0.00460405	ASS1//FECH//PCK2//RPS6KB1//TFAP4
GO:0007059	chromosome_segregation	Biological Process	24	273	1086	18342	0.0345415	0.40654	1.46166	1.48479	0.0220994	AGO4//BLM//BRCA1//BRIP1//CCNB1IP1//CDK5RAP2//CDT1//CEP57//CHAMP1//CHMP3//CHMP4C//EME1//HORMAD1//MLH1//MLH3//MRE11//MSH5//NEK8//NUP62//SMC1A//SMC1B//SYCE1L//SYCP2//TRIP13
GO:0006289	nucleotide-excision_repair	Biological Process	12	113	1086	18342	0.0352961	0.414437	1.45227	1.79358	0.0110497	BRIP1//ERCC1//GTF2H3//LIG1//POLD2//POLD3//POLL//POLR2D//RAD51D//XPA//XPC//XRCC1
GO:0042149	cellular_response_to_glucose_starvation	Biological Process	6	42	1086	18342	0.0359652	0.421294	1.44412	2.41279	0.00552486	ASNS//MYBBP1A//NUAK2//SESN2//TBL2//XBP1
GO:0006475	internal_protein_amino_acid_acetylation	Biological Process	14	139	1086	18342	0.0360696	0.421521	1.44286	1.7011	0.0128913	EHHADH//EP400//ING4//ING5//KAT2B//MECP2//OGT//PHF10//PHF20//RSF1//TADA2A//TAF12//WDR5//YEATS4
GO:0016073	snRNA_metabolic_process	Biological Process	11	101	1086	18342	0.036475	0.425255	1.43801	1.83945	0.0101289	EXOSC5//EXOSC6//EXOSC7//EXOSC8//INTS14//POLR2D//POU2F1//RPAP2//SNAPC5//SP1//ZC3H8
GO:0007584	response_to_nutrient	Biological Process	19	206	1086	18342	0.0369696	0.43001	1.43216	1.55777	0.0174954	AACS//AHCY//ASS1//BRIP1//CASP1//DHODH//EEF2//ERCC1//HLCS//HMGCL//HSP90B1//MGMT//OGT//RPS6KB1//SRSF2//STC2//TYMS//UFL1//XBP1
GO:0032508	DNA_duplex_unwinding	Biological Process	8	65	1086	18342	0.0373369	0.43063	1.42786	2.07871	0.00736648	BLM//BRIP1//GINS2//MCM2//MCM4//MCM6//MRE11//WRN
GO:0009156	ribonucleoside_monophosphate_biosynthetic_process	Biological Process	12	114	1086	18342	0.0374136	0.43063	1.42697	1.77784	0.0110497	ATIC//ATP5S//CAD//DHODH//DHTKD1//GMPS//NMRK1//PFAS//PFKL//PRTFDC1//SLC25A13//UCK2
GO:0006446	regulation_of_translational_initiation	Biological Process	9	77	1086	18342	0.0377191	0.43063	1.42344	1.9741	0.00828729	EIF2AK1//EIF4A2//EIF4B//GLE1//MTIF2//POLR2D//PPP1R15A//RPS6KB1//TPR
GO:0019395	fatty_acid_oxidation	Biological Process	9	77	1086	18342	0.0377191	0.43063	1.42344	1.9741	0.00828729	ACAA2//ACAD11//ACAT1//DECR1//EHHADH//ETFB//IVD//MECR//SESN2
GO:0070585	protein_localization_to_mitochondrion	Biological Process	9	77	1086	18342	0.0377191	0.43063	1.42344	1.9741	0.00828729	AGK//CHCHD4//DDIT3//IMMP2L//MTX3//SLC25A6//TIMM10B//TIMM9//TOMM20
GO:0009650	UV_protection	Biological Process	3	13	1086	18342	0.0378859	0.43063	1.42152	3.89758	0.00276243	ERCC1//SCARA3//XPA
GO:0045078	positive_regulation_of_interferon-gamma_biosynthetic_process	Biological Process	3	13	1086	18342	0.0378859	0.43063	1.42152	3.89758	0.00276243	CEBPG//TLR3//TNFRSF13C
GO:0098789	pre-mRNA_cleavage_required_for_polyadenylation	Biological Process	3	13	1086	18342	0.0378859	0.43063	1.42152	3.89758	0.00276243	CPSF4//CPSF6//FIP1L1
GO:1904293	negative_regulation_of_ERAD_pathway	Biological Process	3	13	1086	18342	0.0378859	0.43063	1.42152	3.89758	0.00276243	DERL3//UBE2G2//USP25
GO:0002381	immunoglobulin_production_involved_in_immunoglobulin_mediated_immune_response	Biological Process	4	22	1086	18342	0.0380658	0.43063	1.41947	3.07082	0.00368324	ERCC1//EXO1//EXOSC6//MLH1
GO:0039702	viral_budding_via_host_ESCRT_complex	Biological Process	4	22	1086	18342	0.0380658	0.43063	1.41947	3.07082	0.00368324	CHMP3//CHMP4C//MITD1//TSG101
GO:1901673	regulation_of_mitotic_spindle_assembly	Biological Process	4	22	1086	18342	0.0380658	0.43063	1.41947	3.07082	0.00368324	CHMP3//CHMP4C//SMC1A//TPR
GO:0031297	replication_fork_processing	Biological Process	5	32	1086	18342	0.0383514	0.43091	1.41622	2.63898	0.00460405	BLM//EME1//NUCKS1//PRIMPOL//WRN
GO:0070670	response_to_interleukin-4	Biological Process	5	32	1086	18342	0.0383514	0.43091	1.41622	2.63898	0.00460405	MCM2//RPL3//STAT5B//STAT6//XBP1
GO:0097352	autophagosome_maturation	Biological Process	5	32	1086	18342	0.0383514	0.43091	1.41622	2.63898	0.00460405	CHMP3//STX17//TSG101//VIPAS39//VPS33B
GO:0032984	protein-containing_complex_disassembly	Biological Process	21	235	1086	18342	0.0394718	0.440983	1.40371	1.50927	0.019337	CHMP3//EIF2D//HDAC6//KLC1//MRPL2//MRPL21//MRPL24//MRPL33//MRPS18B//MRPS25//MRPS27//MRRF//MTIF2//OXA1L//PEX14//SMARCE1//STX17//SUPT16H//TSG101//VIPAS39//VPS33B
GO:0006397	mRNA_processing	Biological Process	38	478	1086	18342	0.0397603	0.440983	1.40055	1.34268	0.0349908	ADARB1//ARL6IP4//BUD13//CLNS1A//CNOT6L//CPSF4//CPSF6//DDX42//DHX35//FIP1L1//GCFC2//GEMIN5//GTF2H3//LSM8//LUC7L3//MBNL3//NCBP3//NOL3//PAN2//PDCD7//PNN//POLR2D//PPP1R8//PRPF6//PSIP1//PTCD2//RAVER1//RAVER2//RBBP6//RBFOX2//RBM5//SRRM2//SRSF2//SRSF5//TSEN2//TTF2//ZCCHC8//ZRANB2
GO:0071548	response_to_dexamethasone	Biological Process	6	43	1086	18342	0.039784	0.440983	1.40029	2.35667	0.00552486	ASS1//CLDN1//FECH//PCK2//RPS6KB1//TFAP4
GO:1903573	negative_regulation_of_response_to_endoplasmic_reticulum_stress	Biological Process	6	43	1086	18342	0.039784	0.440983	1.40029	2.35667	0.00552486	DERL3//HERPUD1//PPP1R15A//UBE2G2//USP25//XBP1
GO:0007623	circadian_rhythm	Biological Process	14	141	1086	18342	0.0399774	0.440983	1.39819	1.67697	0.0128913	AHCY//ARNTL2//ASS1//CAVIN3//CLDN4//GFPT1//HEBP1//MTA1//MYBBP1A//OGT//PER3//RELB//TIMELESS//TYMS
GO:0016573	histone_acetylation	Biological Process	13	128	1086	18342	0.0399776	0.440983	1.39818	1.71534	0.0119705	EP400//ING4//ING5//KAT2B//MECP2//OGT//PHF10//PHF20//RSF1//TADA2A//TAF12//WDR5//YEATS4
GO:0007346	regulation_of_mitotic_cell_cycle	Biological Process	51	671	1086	18342	0.0399845	0.440983	1.39811	1.2837	0.0469613	ASNS//BLM//BRCA1//CDK5RAP2//CDK5RAP3//CDK6//CDT1//CEP192//CEP250//CEP57//CHMP3//CHMP4C//CNOT6L//CNTRL//DONSON//DTL//EME1//FANCI//HAUS4//KNTC1//MAP2K5//MAP3K14//MAP3K20//MECP2//MRE11//NAE1//NLE1//NOP53//NUP62//ODF2//PCM1//PRKDC//PSME1//RBL1//RCC2//RDX//RNASEH2B//RPS6KB1//SDCCAG8//SLF2//SMC1A//STAT5B//STOX1//STRADB//TFAP4//TOM1L1//TPR//TPRA1//TRIP13//WNT9A//XPC
GO:0031532	actin_cytoskeleton_reorganization	Biological Process	8	66	1086	18342	0.0403736	0.440983	1.3939	2.04721	0.00736648	CDC42BPB//DMTN//MYH9//PARVA//PARVB//PRKCZ//RHOBTB1//SHC1
GO:0060402	calcium_ion_transport_into_cytosol	Biological Process	8	66	1086	18342	0.0403736	0.440983	1.3939	2.04721	0.00736648	DDIT3//FGF2//ITPR3//JPH2//NOL3//RASA3//RYR2//TPCN1
GO:0071479	cellular_response_to_ionizing_radiation	Biological Process	8	66	1086	18342	0.0403736	0.440983	1.3939	2.04721	0.00736648	ATR//BLM//FBXO4//MAP3K20//MGMT//NUCKS1//RAD51AP1//WRN
GO:0009060	aerobic_respiration	Biological Process	9	78	1086	18342	0.0404939	0.440983	1.39261	1.94879	0.00828729	ACO2//DHTKD1//FAHD1//FH//IDH2//ME3//OXA1L//SLC25A14//SUCLG2
GO:0034440	lipid_oxidation	Biological Process	9	78	1086	18342	0.0404939	0.440983	1.39261	1.94879	0.00828729	ACAA2//ACAD11//ACAT1//DECR1//EHHADH//ETFB//IVD//MECR//SESN2
GO:0042273	ribosomal_large_subunit_biogenesis	Biological Process	9	78	1086	18342	0.0404939	0.440983	1.39261	1.94879	0.00828729	FBXW9//LAS1L//MRTO4//NLE1//NOP53//RPL10A//RPL12//RPL14//RPL3
GO:0060401	cytosolic_calcium_ion_transport	Biological Process	9	78	1086	18342	0.0404939	0.440983	1.39261	1.94879	0.00828729	AFG3L2//DDIT3//FGF2//ITPR3//JPH2//NOL3//RASA3//RYR2//TPCN1
GO:0006403	RNA_localization	Biological Process	20	222	1086	18342	0.0406707	0.441937	1.39072	1.52158	0.0184162	ATR//ATXN2//CPSF4//FIP1L1//GLE1//IGF2BP3//LRPPRC//MYO1C//NCBP3//NOP53//NUP107//NUP210//NUP62//POLR2D//PRPF6//SRSF2//SRSF5//TOMM20//TPR//UPF3A
GO:0019941	modification-dependent_protein_catabolic_process	Biological Process	40	509	1086	18342	0.041473	0.44453	1.38223	1.32727	0.0368324	ANAPC16//DDIT3//DERL3//DTL//DTX3L//FBXL16//FBXL20//FBXL4//FBXL5//FBXO4//FBXW4//HDAC6//HERPUD1//HSP90B1//LONP1//MTA1//NHLRC3//PSMB10//PSMB9//RBBP6//RBCK1//RNF146//RNF165//SKP2//TMEM129//TOM1L1//TSG101//UBA7//UBE2G2//UBE2Z//UBXN11//UBXN4//USP10//USP13//USP16//USP25//USP28//USP36//VPS36//XBP1
GO:0032922	circadian_regulation_of_gene_expression	Biological Process	7	55	1086	18342	0.042597	0.44453	1.37062	2.14957	0.00644567	CAVIN3//GFPT1//MTA1//MYBBP1A//OGT//PER3//RELB
GO:0002891	positive_regulation_of_immunoglobulin_mediated_immune_response	Biological Process	5	33	1086	18342	0.0430779	0.44453	1.36575	2.55902	0.00460405	EXOSC6//MLH1//NSD2//STAT6//UNG
GO:0010165	response_to_X-ray	Biological Process	5	33	1086	18342	0.0430779	0.44453	1.36575	2.55902	0.00460405	BLM//BRCC3//ERCC1//NUCKS1//XRCC2
GO:0043928	exonucleolytic_nuclear-transcribed_mRNA_catabolic_process_involved_in_deadenylation-dependent_decay	Biological Process	5	33	1086	18342	0.0430779	0.44453	1.36575	2.55902	0.00460405	DCP1B//EXOSC5//EXOSC6//EXOSC7//EXOSC8
GO:0044275	cellular_carbohydrate_catabolic_process	Biological Process	5	33	1086	18342	0.0430779	0.44453	1.36575	2.55902	0.00460405	ENOSF1//GAA//GK5//IDNK//SORD
GO:0016570	histone_modification	Biological Process	32	394	1086	18342	0.0436785	0.44453	1.35973	1.37174	0.0294659	BRCC3//DTX3L//ELK4//EP400//FKBP10//HDAC6//HLCS//HMG20B//ING4//ING5//KAT2B//KMT5A//MECP2//MTA1//NSD2//NUAK2//OGT//PHF10//PHF2//PHF20//PPM1F//PRMT3//RIOX2//RSF1//SETD6//SETD7//TADA2A//TAF12//USP16//USP36//WDR5//YEATS4
GO:0006163	purine_nucleotide_metabolic_process	Biological Process	37	467	1086	18342	0.0437936	0.44453	1.35859	1.33814	0.03407	ACAT1//ACOT4//ACSL5//ACSM3//ATIC//ATP5S//COQ7//COQ9//DCAKD//DHTKD1//DNPH1//GMPS//HMGCL//MCCC2//MCEE//MECP2//MOCOS//MT-ND5//MTHFD1//NDUFA10//NDUFA7//NDUFB1//NDUFB5//NDUFV1//NDUFV3//NPR1//NUDT3//PAPSS2//PDE10A//PFAS//PFKL//PPCS//PRTFDC1//SLC25A13//SLC26A2//SUCLG2//SULT1A1
GO:1901185	negative_regulation_of_ERBB_signaling_pathway	Biological Process	6	44	1086	18342	0.0438503	0.44453	1.35803	2.30311	0.00552486	HGS//NUP62//PTPN18//SNX5//SOCS4//TSG101
GO:0003433	chondrocyte_development_involved_in_endochondral_bone_morphogenesis	Biological Process	4	23	1086	18342	0.0439911	0.44453	1.35663	2.9373	0.00368324	COL7A1//POC1A//SCARA3//SERPINH1
GO:0006509	membrane_protein_ectodomain_proteolysis	Biological Process	4	23	1086	18342	0.0439911	0.44453	1.35663	2.9373	0.00368324	BACE2//ERAP1//MYH9//NCSTN
GO:0043981	histone_H4-K5_acetylation	Biological Process	4	23	1086	18342	0.0439911	0.44453	1.35663	2.9373	0.00368324	ING4//OGT//PHF20//WDR5
GO:0043982	histone_H4-K8_acetylation	Biological Process	4	23	1086	18342	0.0439911	0.44453	1.35663	2.9373	0.00368324	ING4//OGT//PHF20//WDR5
GO:0043984	histone_H4-K16_acetylation	Biological Process	4	23	1086	18342	0.0439911	0.44453	1.35663	2.9373	0.00368324	ING4//OGT//PHF20//WDR5
GO:0006413	translational_initiation	Biological Process	14	143	1086	18342	0.044177	0.44453	1.3548	1.65352	0.0128913	EIF2D//EIF2S3//EIF3A//EIF3D//EIF3L//EIF4A2//EIF4B//MTFMT//MTIF2//RPL10A//RPL12//RPL14//RPL3//RPL4
GO:0045930	negative_regulation_of_mitotic_cell_cycle	Biological Process	23	266	1086	18342	0.0443599	0.44453	1.35301	1.46037	0.0211786	BLM//BRCA1//CDK5RAP3//CDT1//CHMP4C//CNOT6L//DONSON//EME1//FANCI//KNTC1//MAP3K20//MRE11//NAE1//NLE1//NOP53//PRKDC//RBL1//TOM1L1//TPR//TPRA1//TRIP13//WNT9A//XPC
GO:0006104	succinyl-CoA_metabolic_process	Biological Process	2	6	1086	18342	0.044791	0.44453	1.34881	5.62983	0.00184162	ACOT4//SUCLG2
GO:0006189	'de_novo'_IMP_biosynthetic_process	Biological Process	2	6	1086	18342	0.044791	0.44453	1.34881	5.62983	0.00184162	ATIC//PFAS
GO:0006207	'de_novo'_pyrimidine_nucleobase_biosynthetic_process	Biological Process	2	6	1086	18342	0.044791	0.44453	1.34881	5.62983	0.00184162	CAD//DHODH
GO:0010968	regulation_of_microtubule_nucleation	Biological Process	2	6	1086	18342	0.044791	0.44453	1.34881	5.62983	0.00184162	EML2//MECP2
GO:0032876	negative_regulation_of_DNA_endoreduplication	Biological Process	2	6	1086	18342	0.044791	0.44453	1.34881	5.62983	0.00184162	MRE11//SMC1A
GO:0034201	response_to_oleic_acid	Biological Process	2	6	1086	18342	0.044791	0.44453	1.34881	5.62983	0.00184162	AACS//ASS1
GO:0035795	negative_regulation_of_mitochondrial_membrane_permeability	Biological Process	2	6	1086	18342	0.044791	0.44453	1.34881	5.62983	0.00184162	ACAA2//NOL3
GO:0042138	meiotic_DNA_double-strand_break_formation	Biological Process	2	6	1086	18342	0.044791	0.44453	1.34881	5.62983	0.00184162	HORMAD1//MRE11
GO:0042373	vitamin_K_metabolic_process	Biological Process	2	6	1086	18342	0.044791	0.44453	1.34881	5.62983	0.00184162	UBIAD1//VKORC1L1
GO:0042426	choline_catabolic_process	Biological Process	2	6	1086	18342	0.044791	0.44453	1.34881	5.62983	0.00184162	ALDH7A1//CHDH
GO:0043111	replication_fork_arrest	Biological Process	2	6	1086	18342	0.044791	0.44453	1.34881	5.62983	0.00184162	MSH3//TIMELESS
GO:0050428	3'-phosphoadenosine_5'-phosphosulfate_biosynthetic_process	Biological Process	2	6	1086	18342	0.044791	0.44453	1.34881	5.62983	0.00184162	PAPSS2//SLC26A2
GO:0071042	nuclear_polyadenylation-dependent_mRNA_catabolic_process	Biological Process	2	6	1086	18342	0.044791	0.44453	1.34881	5.62983	0.00184162	EXOSC7//EXOSC8
GO:0072423	response_to_DNA_damage_checkpoint_signaling	Biological Process	2	6	1086	18342	0.044791	0.44453	1.34881	5.62983	0.00184162	EME1//SMC1A
GO:1904491	protein_localization_to_ciliary_transition_zone	Biological Process	2	6	1086	18342	0.044791	0.44453	1.34881	5.62983	0.00184162	TCTN1//TMEM107
GO:1904781	positive_regulation_of_protein_localization_to_centrosome	Biological Process	2	6	1086	18342	0.044791	0.44453	1.34881	5.62983	0.00184162	CEP250//NUP62
GO:2000664	positive_regulation_of_interleukin-5_secretion	Biological Process	2	6	1086	18342	0.044791	0.44453	1.34881	5.62983	0.00184162	IL17RB//PRKCZ
GO:2000667	positive_regulation_of_interleukin-13_secretion	Biological Process	2	6	1086	18342	0.044791	0.44453	1.34881	5.62983	0.00184162	IL17RB//PRKCZ
GO:0032446	protein_modification_by_small_protein_conjugation	Biological Process	53	707	1086	18342	0.0454613	0.44453	1.34236	1.26612	0.0488029	ANAPC16//BARD1//BRCA1//CCNB1IP1//CDK5RAP3//DCAF10//DCAF8//DTL//DTX3L//FANCL//FBXL16//FBXL20//FBXL4//FBXL5//FBXO17//FBXO4//FBXW4//FBXW8//FBXW9//HDAC6//HERC6//IPP//KBTBD11//KLHL31//KLHL35//LRSAM1//MAGEF1//NAE1//NHLRC3//NSMCE1//PELI3//PEX14//PRKDC//RAD18//RBBP6//RBCK1//RNF146//RNF165//SENP6//SKP2//SOCS4//THOP1//TMEM129//TRIM68//TSG101//UBA7//UBE2G2//UBE2V1//UBE2Z//UBE3B//UFL1//UFM1//ZNF738
GO:0006473	protein_acetylation	Biological Process	15	157	1086	18342	0.0457686	0.44453	1.33943	1.61365	0.0138122	EHHADH//EP400//ING4//ING5//KAT2B//MECP2//NUPR1//OGT//PHF10//PHF20//RSF1//TADA2A//TAF12//WDR5//YEATS4
GO:0003016	respiratory_system_process	Biological Process	3	14	1086	18342	0.0461509	0.44453	1.33582	3.61918	0.00276243	ADH5//GAA//TNNC1
GO:0006241	CTP_biosynthetic_process	Biological Process	3	14	1086	18342	0.0461509	0.44453	1.33582	3.61918	0.00276243	CTPS1//CTPS2//UCK2
GO:0032042	mitochondrial_DNA_metabolic_process	Biological Process	3	14	1086	18342	0.0461509	0.44453	1.33582	3.61918	0.00276243	LONP1//PRIMPOL//SESN2
GO:0046040	IMP_metabolic_process	Biological Process	3	14	1086	18342	0.0461509	0.44453	1.33582	3.61918	0.00276243	ATIC//PFAS//PRTFDC1
GO:0070914	UV-damage_excision_repair	Biological Process	3	14	1086	18342	0.0461509	0.44453	1.33582	3.61918	0.00276243	ERCC1//XPA//XPC
GO:0098787	mRNA_cleavage_involved_in_mRNA_processing	Biological Process	3	14	1086	18342	0.0461509	0.44453	1.33582	3.61918	0.00276243	CPSF4//CPSF6//FIP1L1
GO:0065002	intracellular_protein_transmembrane_transport	Biological Process	7	56	1086	18342	0.0463001	0.44453	1.33442	2.11119	0.00644567	AGK//C2CD5//CHCHD4//PEX1//PEX14//TIMM9//TOMM20
GO:1905897	regulation_of_response_to_endoplasmic_reticulum_stress	Biological Process	9	80	1086	18342	0.04645	0.44453	1.33301	1.90007	0.00828729	DDIT3//DERL3//FICD//HERPUD1//PPP1R15A//UBE2G2//USP13//USP25//XBP1
GO:0050658	RNA_transport	Biological Process	18	198	1086	18342	0.0466564	0.44453	1.33109	1.53541	0.0165746	ATXN2//CPSF4//FIP1L1//GLE1//IGF2BP3//LRPPRC//MYO1C//NCBP3//NOP53//NUP107//NUP210//NUP62//POLR2D//SRSF2//SRSF5//TOMM20//TPR//UPF3A
GO:0009636	response_to_toxic_substance	Biological Process	38	485	1086	18342	0.0476748	0.44453	1.32171	1.3233	0.0349908	AACS//ADH5//APTX//ASNS//ASS1//AXL//BRIP1//CLDN1//EEF1B2//EEF2//EPHX2//ESD//FECH//FOSL1//HBE1//HDAC6//IL18BP//MAOB//MARC2//MGMT//MT-ND5//MT1E//NUPR1//NXNL2//PRDX2//RPL10A//RPS6KB1//SESN2//SETD7//SIGMAR1//SLC7A11//STAT6//TIMELESS//TXNRD2//TXNRD3//TYMS//UBIAD1//XPA
GO:0000027	ribosomal_large_subunit_assembly	Biological Process	5	34	1086	18342	0.0481387	0.44453	1.31751	2.48375	0.00460405	MRTO4//NLE1//NOP53//RPL12//RPL3
GO:0009991	response_to_extracellular_stimulus	Biological Process	39	501	1086	18342	0.0491559	0.44453	1.30842	1.31475	0.0359116	AACS//ACAT1//AHCY//ASNS//ASS1//AXL//BRIP1//CAD//CASP1//CBS//DDIT3//DHODH//EEF2//EIF2AK1//ERCC1//FADS1//FOSL1//HLCS//HMGCL//HSP90B1//LARS//MGMT//MYBBP1A//NUAK2//OGT//PCK2//RMI1//RPS6KB1//SESN2//SKP2//SORD//SRSF2//STC2//TBL2//TYMS//UFL1//ULK2//WRN//XBP1
GO:0031503	protein-containing_complex_localization	Biological Process	21	241	1086	18342	0.0494024	0.44453	1.30625	1.4717	0.019337	ATR//CLUAP1//CPSF4//FIP1L1//GLE1//IFT172//IFT57//IFT74//IFT80//IFT81//NOP53//NUP107//NUP210//NUP62//PCM1//POLR2D//RCC2//SRSF2//SRSF5//TPR//WDR34
GO:0006297	nucleotide-excision_repair,_DNA_gap_filling	Biological Process	4	24	1086	18342	0.0504028	0.44453	1.29755	2.81492	0.00368324	LIG1//POLD2//POLD3//XRCC1
GO:0042135	neurotransmitter_catabolic_process	Biological Process	4	24	1086	18342	0.0504028	0.44453	1.29755	2.81492	0.00368324	ALDH5A1//ALDH7A1//CHDH//MAOB
GO:0050434	positive_regulation_of_viral_transcription	Biological Process	4	24	1086	18342	0.0504028	0.44453	1.29755	2.81492	0.00368324	NUCKS1//RSF1//SP1//TFAP4
GO:0042180	cellular_ketone_metabolic_process	Biological Process	8	69	1086	18342	0.0504525	0.44453	1.29712	1.9582	0.00736648	CBR3//COQ4//COQ7//COQ9//DHRS4//KDSR//STAT5B//UBIAD1
GO:0018393	internal_peptidyl-lysine_acetylation	Biological Process	13	133	1086	18342	0.0516925	0.44453	1.28657	1.65085	0.0119705	EP400//ING4//ING5//KAT2B//MECP2//OGT//PHF10//PHF20//RSF1//TADA2A//TAF12//WDR5//YEATS4
GO:0001961	positive_regulation_of_cytokine-mediated_signaling_pathway	Biological Process	6	46	1086	18342	0.0527369	0.44453	1.27789	2.20298	0.00552486	AXL//CASP1//CASP4//MAVS//PARP14//TRIM44
GO:0006511	ubiquitin-dependent_protein_catabolic_process	Biological Process	39	504	1086	18342	0.0529104	0.44453	1.27646	1.30693	0.0359116	ANAPC16//DDIT3//DERL3//DTL//DTX3L//FBXL16//FBXL20//FBXL4//FBXL5//FBXO4//FBXW4//HDAC6//HERPUD1//HSP90B1//MTA1//NHLRC3//PSMB10//PSMB9//RBBP6//RBCK1//RNF146//RNF165//SKP2//TMEM129//TOM1L1//TSG101//UBA7//UBE2G2//UBE2Z//UBXN11//UBXN4//USP10//USP13//USP16//USP25//USP28//USP36//VPS36//XBP1
GO:0000291	nuclear-transcribed_mRNA_catabolic_process,_exonucleolytic	Biological Process	5	35	1086	18342	0.0535357	0.44453	1.27136	2.41279	0.00460405	DCP1B//EXOSC5//EXOSC6//EXOSC7//EXOSC8
GO:0045494	photoreceptor_cell_maintenance	Biological Process	5	35	1086	18342	0.0535357	0.44453	1.27136	2.41279	0.00460405	BBS1//BBS10//DRAM2//IQCB1//NXNL2
GO:0002181	cytoplasmic_translation	Biological Process	8	70	1086	18342	0.0541424	0.44453	1.26646	1.93023	0.00736648	EIF2D//EIF2S3//EIF3A//EIF3D//EIF4B//MRPL2//RPL10A//RPL4
GO:0002637	regulation_of_immunoglobulin_production	Biological Process	7	58	1086	18342	0.0543073	0.44453	1.26514	2.03839	0.00644567	EXOSC6//MLH1//NSD2//PRKDC//STAT6//UNG//XBP1
GO:0010803	regulation_of_tumor_necrosis_factor-mediated_signaling_pathway	Biological Process	7	58	1086	18342	0.0543073	0.44453	1.26514	2.03839	0.00644567	CARD16//CASP1//CASP4//IKBKB//NOL3//PELI3//RBCK1
GO:0044774	mitotic_DNA_integrity_checkpoint	Biological Process	11	108	1086	18342	0.0548446	0.44453	1.26087	1.72023	0.0101289	BLM//CDK5RAP3//CNOT6L//DONSON//EME1//FANCI//MRE11//NAE1//NOP53//PRKDC//XPC
GO:0031000	response_to_caffeine	Biological Process	3	15	1086	18342	0.0552236	0.44453	1.25788	3.3779	0.00276243	CAD//DHODH//RYR2
GO:0034063	stress_granule_assembly	Biological Process	3	15	1086	18342	0.0552236	0.44453	1.25788	3.3779	0.00276243	ATXN2//C9orf72//CIRBP
GO:0034356	NAD_biosynthesis_via_nicotinamide_riboside_salvage_pathway	Biological Process	3	15	1086	18342	0.0552236	0.44453	1.25788	3.3779	0.00276243	NAPRT//PARP10//PARP16
GO:0050884	neuromuscular_process_controlling_posture	Biological Process	3	15	1086	18342	0.0552236	0.44453	1.25788	3.3779	0.00276243	ADARB1//GAA//MECP2
GO:0051895	negative_regulation_of_focal_adhesion_assembly	Biological Process	3	15	1086	18342	0.0552236	0.44453	1.25788	3.3779	0.00276243	DMTN//PHLDB2//RCC2
GO:1902188	positive_regulation_of_viral_release_from_host_cell	Biological Process	3	15	1086	18342	0.0552236	0.44453	1.25788	3.3779	0.00276243	CHMP3//CHMP4C//TSG101
GO:0018205	peptidyl-lysine_modification	Biological Process	24	287	1086	18342	0.0558517	0.44453	1.25296	1.41236	0.0220994	EEF1AKMT1//EEF2KMT//EP400//HDAC6//ING4//ING5//KAT2B//KMT5A//LOXL4//MECP2//NSD2//OGT//PHF10//PHF20//RSF1//SENP6//SETD6//SETD7//TADA2A//TAF12//VIPAS39//VPS33B//WDR5//YEATS4
GO:0051603	proteolysis_involved_in_cellular_protein_catabolic_process	Biological Process	43	567	1086	18342	0.0571387	0.44453	1.24307	1.28086	0.0395948	ANAPC16//CHMP4C//DDIT3//DERL3//DNAJB12//DTL//DTX3L//FBXL16//FBXL20//FBXL4//FBXL5//FBXO4//FBXW4//HDAC6//HERPUD1//HSP90B1//LONP1//MTA1//NGLY1//NHLRC3//PSMB10//PSMB9//RBBP6//RBCK1//RNF146//RNF165//SKP2//TMEM129//TOM1L1//TSG101//UBA7//UBE2G2//UBE2Z//UBXN11//UBXN4//USP10//USP13//USP16//USP25//USP28//USP36//VPS36//XBP1
GO:0034728	nucleosome_organization	Biological Process	15	162	1086	18342	0.0572781	0.44453	1.24201	1.56384	0.0138122	ANP32B//ASF1B//CENPH//CENPK//CENPL//CHAF1A//CHAF1B//HP1BP3//ITGB3BP//MCM2//NASP//RSF1//SMARCE1//SUPT16H//TSPYL4
GO:0050732	negative_regulation_of_peptidyl-tyrosine_phosphorylation	Biological Process	6	47	1086	18342	0.0575613	0.44453	1.23987	2.15611	0.00552486	DMTN//LRRK1//PARP14//PRKCZ//SOCS4//TSG101
GO:0007292	female_gamete_generation	Biological Process	12	122	1086	18342	0.0576426	0.44453	1.23926	1.66126	0.0110497	ERCC1//FOSL1//HORMAD1//IMMP2L//MLH1//MLH3//MSH5//NANOS3//SYCP2//TRIP13//WASHC5//ZP3
GO:0000245	spliceosomal_complex_assembly	Biological Process	7	59	1086	18342	0.0586152	0.44453	1.23199	2.00384	0.00644567	GCFC2//LUC7L3//NOL3//PRPF6//PSIP1//RBM5//SRSF5
GO:0008333	endosome_to_lysosome_transport	Biological Process	7	59	1086	18342	0.0586152	0.44453	1.23199	2.00384	0.00644567	CHMP3//DTX3L//TSG101//VIPAS39//VPS11//VPS33B//VPS39
GO:0000460	maturation_of_5.8S_rRNA	Biological Process	5	36	1086	18342	0.0592693	0.44453	1.22717	2.34576	0.00460405	EXOSC7//EXOSC8//FBXW9//LAS1L//UTP20
GO:0018394	peptidyl-lysine_acetylation	Biological Process	13	136	1086	18342	0.059749	0.44453	1.22367	1.61444	0.0119705	EP400//ING4//ING5//KAT2B//MECP2//OGT//PHF10//PHF20//RSF1//TADA2A//TAF12//WDR5//YEATS4
GO:0006890	retrograde_vesicle-mediated_transport,_Golgi_to_ER	Biological Process	9	84	1086	18342	0.0600414	0.44453	1.22155	1.80959	0.00828729	ATP9A//COG4//COPA//COPG1//COPZ1//COPZ2//KIF15//KLC1//TMED10
GO:0000052	citrulline_metabolic_process	Biological Process	2	7	1086	18342	0.0602874	0.44453	1.21977	4.82557	0.00184162	ASS1//CAD
GO:0000467	exonucleolytic_trimming_to_generate_mature_3'-end_of_5.8S_rRNA_from_tricistronic_rRNA_transcript_(SSU-rRNA,_5.8S_rRNA,_LSU-rRNA)	Biological Process	2	7	1086	18342	0.0602874	0.44453	1.21977	4.82557	0.00184162	EXOSC7//EXOSC8
GO:0002578	negative_regulation_of_antigen_processing_and_presentation	Biological Process	2	7	1086	18342	0.0602874	0.44453	1.21977	4.82557	0.00184162	HLA-DOB//TAPBPL
GO:0006526	arginine_biosynthetic_process	Biological Process	2	7	1086	18342	0.0602874	0.44453	1.21977	4.82557	0.00184162	ASS1//CAD
GO:0006564	L-serine_biosynthetic_process	Biological Process	2	7	1086	18342	0.0602874	0.44453	1.21977	4.82557	0.00184162	SHMT2//SRR
GO:0007000	nucleolus_organization	Biological Process	2	7	1086	18342	0.0602874	0.44453	1.21977	4.82557	0.00184162	NOLC1//USP36
GO:0007144	female_meiosis_I	Biological Process	2	7	1086	18342	0.0602874	0.44453	1.21977	4.82557	0.00184162	MLH3//TRIP13
GO:0010825	positive_regulation_of_centrosome_duplication	Biological Process	2	7	1086	18342	0.0602874	0.44453	1.21977	4.82557	0.00184162	NUP62//POC1A
GO:0014808	release_of_sequestered_calcium_ion_into_cytosol_by_sarcoplasmic_reticulum	Biological Process	2	7	1086	18342	0.0602874	0.44453	1.21977	4.82557	0.00184162	NOL3//RYR2
GO:0019530	taurine_metabolic_process	Biological Process	2	7	1086	18342	0.0602874	0.44453	1.21977	4.82557	0.00184162	CSAD//STAT5B
GO:0034128	negative_regulation_of_MyD88-independent_toll-like_receptor_signaling_pathway	Biological Process	2	7	1086	18342	0.0602874	0.44453	1.21977	4.82557	0.00184162	SARM1//TLR3
GO:0035356	cellular_triglyceride_homeostasis	Biological Process	2	7	1086	18342	0.0602874	0.44453	1.21977	4.82557	0.00184162	SLC25A27//XBP1
GO:0035948	positive_regulation_of_gluconeogenesis_by_positive_regulation_of_transcription_from_RNA_polymerase_II_promoter	Biological Process	2	7	1086	18342	0.0602874	0.44453	1.21977	4.82557	0.00184162	KAT2B//WDR5
GO:0042148	strand_invasion	Biological Process	2	7	1086	18342	0.0602874	0.44453	1.21977	4.82557	0.00184162	RAD51D//XRCC2
GO:0044806	G-quadruplex_DNA_unwinding	Biological Process	2	7	1086	18342	0.0602874	0.44453	1.21977	4.82557	0.00184162	BLM//WRN
GO:0044829	positive_regulation_by_host_of_viral_genome_replication	Biological Process	2	7	1086	18342	0.0602874	0.44453	1.21977	4.82557	0.00184162	NUCKS1//YTHDC2
GO:0045063	T-helper_1_cell_differentiation	Biological Process	2	7	1086	18342	0.0602874	0.44453	1.21977	4.82557	0.00184162	RELB//STAT6
GO:0045630	positive_regulation_of_T-helper_2_cell_differentiation	Biological Process	2	7	1086	18342	0.0602874	0.44453	1.21977	4.82557	0.00184162	IL18//PRKCZ
GO:0048702	embryonic_neurocranium_morphogenesis	Biological Process	2	7	1086	18342	0.0602874	0.44453	1.21977	4.82557	0.00184162	MTHFD1//MTHFD1L
GO:0051142	positive_regulation_of_NK_T_cell_proliferation	Biological Process	2	7	1086	18342	0.0602874	0.44453	1.21977	4.82557	0.00184162	IL18//IL23A
GO:0071038	nuclear_polyadenylation-dependent_tRNA_catabolic_process	Biological Process	2	7	1086	18342	0.0602874	0.44453	1.21977	4.82557	0.00184162	EXOSC7//EXOSC8
GO:0071051	polyadenylation-dependent_snoRNA_3'-end_processing	Biological Process	2	7	1086	18342	0.0602874	0.44453	1.21977	4.82557	0.00184162	EXOSC5//EXOSC6
GO:0072711	cellular_response_to_hydroxyurea	Biological Process	2	7	1086	18342	0.0602874	0.44453	1.21977	4.82557	0.00184162	BLM//TIMELESS
GO:0098910	regulation_of_atrial_cardiac_muscle_cell_action_potential	Biological Process	2	7	1086	18342	0.0602874	0.44453	1.21977	4.82557	0.00184162	RNF207//RYR2
GO:1902570	protein_localization_to_nucleolus	Biological Process	2	7	1086	18342	0.0602874	0.44453	1.21977	4.82557	0.00184162	NOP53//WRN
GO:1902966	positive_regulation_of_protein_localization_to_early_endosome	Biological Process	2	7	1086	18342	0.0602874	0.44453	1.21977	4.82557	0.00184162	DTX3L//RDX
GO:1905206	positive_regulation_of_hydrogen_peroxide-induced_cell_death	Biological Process	2	7	1086	18342	0.0602874	0.44453	1.21977	4.82557	0.00184162	HDAC6//PAWR
GO:0006275	regulation_of_DNA_replication	Biological Process	11	110	1086	18342	0.0610542	0.449515	1.21428	1.68895	0.0101289	ATR//BLM//CDAN1//CDT1//DONSON//MRE11//MSH3//NUCKS1//RBBP6//SMC1A//TIMELESS
GO:0006605	protein_targeting	Biological Process	28	349	1086	18342	0.0634723	0.466625	1.19742	1.35503	0.0257827	ACOT4//AGK//AP1M2//CHCHD4//DHRS4//EHHADH//EPHX2//EXOC4//HGS//HMGCL//IMMP2L//LARS//MTX3//MYO1C//PEX1//PEX14//PMM1//RPL10A//RPL12//RPL14//RPL3//RPL4//SLC25A6//TIMM10B//TIMM9//TOMM20//ZDHHC21//ZDHHC24
GO:0022616	DNA_strand_elongation	Biological Process	4	26	1086	18342	0.0646698	0.470571	1.1893	2.59839	0.00368324	GINS2//LIG1//MRE11//POLD2
GO:0045662	negative_regulation_of_myoblast_differentiation	Biological Process	4	26	1086	18342	0.0646698	0.470571	1.1893	2.59839	0.00368324	DDIT3//EID2B//IL18//MBNL3
GO:0070911	global_genome_nucleotide-excision_repair	Biological Process	4	26	1086	18342	0.0646698	0.470571	1.1893	2.59839	0.00368324	ERCC1//GTF2H3//XPA//XPC
GO:0006978	DNA_damage_response,_signal_transduction_by_p53_class_mediator_resulting_in_transcription_of_p21_class_mediator	Biological Process	3	16	1086	18342	0.0650735	0.470571	1.1866	3.16678	0.00276243	BRCA1//ING4//TFAP4
GO:0031573	intra-S_DNA_damage_checkpoint	Biological Process	3	16	1086	18342	0.0650735	0.470571	1.1866	3.16678	0.00276243	EME1//MRE11//XPC
GO:0033539	fatty_acid_beta-oxidation_using_acyl-CoA_dehydrogenase	Biological Process	3	16	1086	18342	0.0650735	0.470571	1.1866	3.16678	0.00276243	ACAD11//ETFB//IVD
GO:0043555	regulation_of_translation_in_response_to_stress	Biological Process	3	16	1086	18342	0.0650735	0.470571	1.1866	3.16678	0.00276243	EIF2AK1//PPP1R15A//SESN2
GO:0097340	inhibition_of_cysteine-type_endopeptidase_activity	Biological Process	3	16	1086	18342	0.0650735	0.470571	1.1866	3.16678	0.00276243	CARD16//NOL3//UBE2Z
GO:0006401	RNA_catabolic_process	Biological Process	21	249	1086	18342	0.0652673	0.470571	1.1853	1.42442	0.019337	AGO4//CNOT6L//DCP1B//DIS3L//EXOSC5//EXOSC6//EXOSC7//EXOSC8//MLH1//MRTO4//PABPC4//PAN2//POLR2D//PPP1R8//RNASEH2B//RPL10A//RPL12//RPL14//RPL3//RPL4//UPF3A
GO:0003416	endochondral_bone_growth	Biological Process	5	37	1086	18342	0.0653386	0.470571	1.18483	2.28237	0.00460405	COL7A1//EVC//POC1A//SCARA3//THBS3
GO:0006296	nucleotide-excision_repair,_DNA_incision,_5'-to_lesion	Biological Process	5	37	1086	18342	0.0653386	0.470571	1.18483	2.28237	0.00460405	ERCC1//GTF2H3//POLD2//POLD3//XPA
GO:0033619	membrane_protein_proteolysis	Biological Process	5	37	1086	18342	0.0653386	0.470571	1.18483	2.28237	0.00460405	BACE2//ERAP1//MBTPS2//MYH9//NCSTN
GO:0050691	regulation_of_defense_response_to_virus_by_host	Biological Process	5	37	1086	18342	0.0653386	0.470571	1.18483	2.28237	0.00460405	DTX3L//IL23A//MAVS//TRAF3IP2//TRIM44
GO:1905898	positive_regulation_of_response_to_endoplasmic_reticulum_stress	Biological Process	5	37	1086	18342	0.0653386	0.470571	1.18483	2.28237	0.00460405	DDIT3//HERPUD1//PPP1R15A//USP13//XBP1
GO:0006283	transcription-coupled_nucleotide-excision_repair	Biological Process	8	73	1086	18342	0.066226	0.47627	1.17897	1.8509	0.00736648	ERCC1//GTF2H3//LIG1//POLD2//POLD3//POLR2D//XPA//XRCC1
GO:0010564	regulation_of_cell_cycle_process	Biological Process	54	742	1086	18342	0.0675266	0.484919	1.17053	1.22916	0.0497238	BLM//BRCA1//BRCC3//CBX5//CDK5RAP2//CDK5RAP3//CDK6//CDT1//CEP192//CEP250//CEP57//CHMP3//CHMP4C//CNOT6L//CNTRL//DONSON//DTL//FANCI//HAUS4//HORMAD1//KAT2B//KNTC1//MECP2//MRE11//MYBBP1A//MYO19//NAE1//NOP53//NUP62//ODF2//PCM1//PHC3//PKP4//POC1A//PRKDC//PSME1//RAB11FIP3//RBL1//RCC2//RDX//RMI2//RNASEH2B//RRM2//SDCCAG8//SENP6//SLF2//SMC1A//STOX1//TFAP4//TOM1L1//TPR//TPRA1//TRIP13//XPC
GO:0046496	nicotinamide_nucleotide_metabolic_process	Biological Process	11	112	1086	18342	0.0677079	0.485517	1.16936	1.65879	0.0101289	DERA//DHTKD1//H6PD//IDH2//NAPRT//NMRK1//PARP10//PARP16//PCK2//PFKL//YJEFN3
GO:0002821	positive_regulation_of_adaptive_immune_response	Biological Process	10	99	1086	18342	0.0680793	0.487475	1.16698	1.70601	0.0092081	EXOSC6//IL18//IL23A//MLH1//NSD2//PRKCZ//STAT6//TNFRSF13C//UNG//ZP3
GO:1901796	regulation_of_signal_transduction_by_p53_class_mediator	Biological Process	12	126	1086	18342	0.0700746	0.501039	1.15444	1.60852	0.0110497	ANKRD1//ATR//CDK5RAP3//ING5//KMT5A//MAPKAPK5//NOP53//PHF20//PPP1R13L//SUPT16H//TAF12//TAF15
GO:0009411	response_to_UV	Biological Process	13	140	1086	18342	0.0717414	0.510693	1.14423	1.56831	0.0119705	ATR//CARD16//CIRBP//DTL//ERCC1//PCLAF//PRIMPOL//RAD18//SCARA3//USP28//WRN//XPA//XPC
GO:0019068	virion_assembly	Biological Process	5	38	1086	18342	0.0717418	0.510693	1.14423	2.2223	0.00460405	CHMP3//CHMP4C//LRSAM1//MITD1//TSG101
GO:0048524	positive_regulation_of_viral_process	Biological Process	9	87	1086	18342	0.0717486	0.510693	1.14419	1.74719	0.00828729	ADARB1//CHMP3//CHMP4C//NUCKS1//RSF1//SP1//TFAP4//TSG101//YTHDC2
GO:0044773	mitotic_DNA_damage_checkpoint	Biological Process	10	100	1086	18342	0.0718372	0.510693	1.14365	1.68895	0.0092081	BLM//CDK5RAP3//CNOT6L//DONSON//EME1//FANCI//MRE11//NOP53//PRKDC//XPC
GO:0006471	protein_ADP-ribosylation	Biological Process	4	27	1086	18342	0.0725113	0.514747	1.13959	2.50215	0.00368324	PARP10//PARP14//PARP16//PARP4
GO:0097193	intrinsic_apoptotic_signaling_pathway	Biological Process	14	154	1086	18342	0.0728541	0.516441	1.13755	1.53541	0.0128913	BRCA1//CASP4//DDIT3//MLH1//MYBBP1A//NOL3//NUPR1//PPM1F//PPP1R15A//PRKDC//TRIB3//USP28//XBP1//XPA
GO:0045815	positive_regulation_of_gene_expression,_epigenetic	Biological Process	6	50	1086	18342	0.0735688	0.520762	1.13331	2.02674	0.00552486	ATAD2//KAT2B//MYBBP1A//MYO1C//PHF2//TAF1D
GO:0042772	DNA_damage_response,_signal_transduction_resulting_in_transcription	Biological Process	3	17	1086	18342	0.0756652	0.526112	1.1211	2.9805	0.00276243	BRCA1//ING4//TFAP4
GO:0070828	heterochromatin_organization	Biological Process	3	17	1086	18342	0.0756652	0.526112	1.1211	2.9805	0.00276243	HP1BP3//SETD7//WDHD1
GO:0090266	regulation_of_mitotic_cell_cycle_spindle_assembly_checkpoint	Biological Process	3	17	1086	18342	0.0756652	0.526112	1.1211	2.9805	0.00276243	CDK5RAP2//CDT1//TPR
GO:2000001	regulation_of_DNA_damage_checkpoint	Biological Process	3	17	1086	18342	0.0756652	0.526112	1.1211	2.9805	0.00276243	FBXO4//RNASEH2B//WDR76
GO:0016569	covalent_chromatin_modification	Biological Process	32	415	1086	18342	0.0764145	0.526112	1.11682	1.30232	0.0294659	BRCC3//DTX3L//ELK4//EP400//FKBP10//HDAC6//HLCS//HMG20B//ING4//ING5//KAT2B//KMT5A//MECP2//MTA1//NSD2//NUAK2//OGT//PHF10//PHF2//PHF20//PPM1F//PRMT3//RIOX2//RSF1//SETD6//SETD7//TADA2A//TAF12//USP16//USP36//WDR5//YEATS4
GO:0043254	regulation_of_protein_complex_assembly	Biological Process	35	460	1086	18342	0.0767965	0.526112	1.11466	1.28507	0.0322284	ARPIN//ATR//ATXN2//BAIAP2L2//BBS10//CDC42EP1//CDK5RAP2//CDT1//CLIP1//CNOT6L//CTNNBIP1//CYFIP1//DMTN//EML2//EPS8L2//ERCC1//FOSL1//GTF2H3//HDAC6//HRK//MECP2//MYO1C//NOP53//PEX14//PMEPA1//PRKCZ//RDX//RHOBTB1//SENP6//SLF2//TBCD//VPS11//WASHC2C//WIPF1//XPA
GO:0044257	cellular_protein_catabolic_process	Biological Process	44	596	1086	18342	0.0769613	0.526112	1.11373	1.24688	0.0405157	ANAPC16//CHMP4C//DDIT3//DERL3//DNAJB12//DTL//DTX3L//FBXL16//FBXL20//FBXL4//FBXL5//FBXO4//FBXW4//HDAC6//HERPUD1//HSP90B1//LONP1//MTA1//NGLY1//NHLRC3//PSMB10//PSMB9//RBBP6//RBCK1//RNF146//RNF165//SKP2//SNX5//TMEM129//TOM1L1//TSG101//UBA7//UBE2G2//UBE2Z//UBXN11//UBXN4//USP10//USP13//USP16//USP25//USP28//USP36//VPS36//XBP1
GO:0000707	meiotic_DNA_recombinase_assembly	Biological Process	2	8	1086	18342	0.0772976	0.526112	1.11183	4.22238	0.00184162	RAD51D//XRCC2
GO:0006108	malate_metabolic_process	Biological Process	2	8	1086	18342	0.0772976	0.526112	1.11183	4.22238	0.00184162	FH//ME3
GO:0006382	adenosine_to_inosine_editing	Biological Process	2	8	1086	18342	0.0772976	0.526112	1.11183	4.22238	0.00184162	ADARB1//ADAT2
GO:0016078	tRNA_catabolic_process	Biological Process	2	8	1086	18342	0.0772976	0.526112	1.11183	4.22238	0.00184162	EXOSC7//EXOSC8
GO:0017183	peptidyl-diphthamide_biosynthetic_process_from_peptidyl-histidine	Biological Process	2	8	1086	18342	0.0772976	0.526112	1.11183	4.22238	0.00184162	DPH5//DPH7
GO:0017185	peptidyl-lysine_hydroxylation	Biological Process	2	8	1086	18342	0.0772976	0.526112	1.11183	4.22238	0.00184162	VIPAS39//VPS33B
GO:0032825	positive_regulation_of_natural_killer_cell_differentiation	Biological Process	2	8	1086	18342	0.0772976	0.526112	1.11183	4.22238	0.00184162	AXL//STAT5B
GO:0034127	regulation_of_MyD88-independent_toll-like_receptor_signaling_pathway	Biological Process	2	8	1086	18342	0.0772976	0.526112	1.11183	4.22238	0.00184162	SARM1//TLR3
GO:0045008	depyrimidination	Biological Process	2	8	1086	18342	0.0772976	0.526112	1.11183	4.22238	0.00184162	MBD4//UNG
GO:0045039	protein_import_into_mitochondrial_inner_membrane	Biological Process	2	8	1086	18342	0.0772976	0.526112	1.11183	4.22238	0.00184162	AGK//TIMM9
GO:0061820	telomeric_D-loop_disassembly	Biological Process	2	8	1086	18342	0.0772976	0.526112	1.11183	4.22238	0.00184162	BLM//WRN
GO:0070127	tRNA_aminoacylation_for_mitochondrial_protein_translation	Biological Process	2	8	1086	18342	0.0772976	0.526112	1.11183	4.22238	0.00184162	GARS//WARS2
GO:0071035	nuclear_polyadenylation-dependent_rRNA_catabolic_process	Biological Process	2	8	1086	18342	0.0772976	0.526112	1.11183	4.22238	0.00184162	EXOSC7//EXOSC8
GO:0071499	cellular_response_to_laminar_fluid_shear_stress	Biological Process	2	8	1086	18342	0.0772976	0.526112	1.11183	4.22238	0.00184162	ASS1//MAP2K5
GO:0072710	response_to_hydroxyurea	Biological Process	2	8	1086	18342	0.0772976	0.526112	1.11183	4.22238	0.00184162	BLM//TIMELESS
GO:0085020	protein_K6-linked_ubiquitination	Biological Process	2	8	1086	18342	0.0772976	0.526112	1.11183	4.22238	0.00184162	BARD1//BRCA1
GO:1903514	release_of_sequestered_calcium_ion_into_cytosol_by_endoplasmic_reticulum	Biological Process	2	8	1086	18342	0.0772976	0.526112	1.11183	4.22238	0.00184162	NOL3//RYR2
GO:1903715	regulation_of_aerobic_respiration	Biological Process	2	8	1086	18342	0.0772976	0.526112	1.11183	4.22238	0.00184162	NOP53//SHMT2
GO:1990416	cellular_response_to_brain-derived_neurotrophic_factor_stimulus	Biological Process	2	8	1086	18342	0.0772976	0.526112	1.11183	4.22238	0.00184162	EEF2//EEF2K
GO:2000643	positive_regulation_of_early_endosome_to_late_endosome_transport	Biological Process	2	8	1086	18342	0.0772976	0.526112	1.11183	4.22238	0.00184162	RDX//VPS11
GO:2001040	positive_regulation_of_cellular_response_to_drug	Biological Process	2	8	1086	18342	0.0772976	0.526112	1.11183	4.22238	0.00184162	HDAC6//PAWR
GO:0071806	protein_transmembrane_transport	Biological Process	7	63	1086	18342	0.0778994	0.529481	1.10847	1.87661	0.00644567	AGK//C2CD5//CHCHD4//PEX1//PEX14//TIMM9//TOMM20
GO:0000959	mitochondrial_RNA_metabolic_process	Biological Process	5	39	1086	18342	0.0784756	0.530487	1.10527	2.16532	0.00460405	GARS//MTERF2//MTERF3//TRNT1//WARS2
GO:0018279	protein_N-linked_glycosylation_via_asparagine	Biological Process	5	39	1086	18342	0.0784756	0.530487	1.10527	2.16532	0.00460405	B4GALNT2//DERL3//ST3GAL3//ST6GALNAC2//UBE2G2
GO:0044380	protein_localization_to_cytoskeleton	Biological Process	5	39	1086	18342	0.0784756	0.530487	1.10527	2.16532	0.00460405	CCDC14//CEP192//CHAMP1//KIAA0753//PCM1
GO:0060236	regulation_of_mitotic_spindle_organization	Biological Process	5	39	1086	18342	0.0784756	0.530487	1.10527	2.16532	0.00460405	CHMP3//CHMP4C//NUP62//SMC1A//TPR
GO:0019538	protein_metabolic_process	Biological Process	288	4526	1086	18342	0.0790436	0.533478	1.10213	1.07472	0.265193	AARS//ACY1//ADAMTS16//ADH5//AFG3L2//AIMP1//ALG10B//ANAPC16//APOL6//ASPH//ASPHD1//ATR//AXL//B4GALNT2//BACE2//BARD1//BRCA1//BRCC3//C1RL//C4BPB//CAD//CAMKK1//CAMKK2//CASP1//CASP4//CCNB1IP1//CDC42BPB//CDK5RAP3//CDK6//CHCHD4//CHMP4C//CLK2//CNTRL//CRTAP//CSF2RA//CSGALNACT1//DARS//DCAF10//DCAF8//DDIT3//DERL3//DESI1//DNAJB12//DPH5//DPH7//DPM3//DPP7//DTL//DTX3L//EEF1AKMT1//EEF1B2//EEF2//EEF2K//EEF2KMT//EE…
GO:0043433	negative_regulation_of_DNA_binding_transcription_factor_activity	Biological Process	14	156	1086	18342	0.0791335	0.533478	1.10164	1.51572	0.0128913	ANXA4//CDK5RAP3//CEBPG//COMMD6//CTNNBIP1//DDIT3//IRAK3//MAP2K5//PARP10//PEX14//RBCK1//RWDD3//SETD6//UFL1
GO:0006213	pyrimidine_nucleoside_metabolic_process	Biological Process	6	51	1086	18342	0.0794148	0.534647	1.1001	1.987	0.00552486	CAD//CTPS1//CTPS2//DHODH//NMRK1//UCK2
GO:0003413	chondrocyte_differentiation_involved_in_endochondral_bone_morphogenesis	Biological Process	4	28	1086	18342	0.0808118	0.538926	1.09253	2.41279	0.00368324	COL7A1//POC1A//SCARA3//SERPINH1
GO:0009649	entrainment_of_circadian_clock	Biological Process	4	28	1086	18342	0.0808118	0.538926	1.09253	2.41279	0.00368324	ARNTL2//GNA11//MTA1//PER3
GO:0010971	positive_regulation_of_G2|M_transition_of_mitotic_cell_cycle	Biological Process	4	28	1086	18342	0.0808118	0.538926	1.09253	2.41279	0.00368324	DTL//MECP2//RCC2//STOX1
GO:0034472	snRNA_3'-end_processing	Biological Process	4	28	1086	18342	0.0808118	0.538926	1.09253	2.41279	0.00368324	EXOSC5//EXOSC6//EXOSC7//EXOSC8
GO:0051290	protein_heterotetramerization	Biological Process	4	28	1086	18342	0.0808118	0.538926	1.09253	2.41279	0.00368324	CPSF6//FARSB//HSD17B8//RRM1
GO:0051304	chromosome_separation	Biological Process	4	28	1086	18342	0.0808118	0.538926	1.09253	2.41279	0.00368324	BLM//EME1//MLH1//MSH5
GO:0071353	cellular_response_to_interleukin-4	Biological Process	4	28	1086	18342	0.0808118	0.538926	1.09253	2.41279	0.00368324	MCM2//RPL3//STAT6//XBP1
GO:0071375	cellular_response_to_peptide_hormone_stimulus	Biological Process	21	256	1086	18342	0.0817766	0.544628	1.08737	1.38547	0.019337	AGTRAP//ASS1//ATP6V1E2//BAIAP2L2//BRIP1//C2CD5//CYFIP1//EEF2K//IGFBP1//KAT2B//PCK2//PRKCZ//PRKDC//RPS6KB1//SHC1//SP1//SRSF5//STAT5B//TRIB3//VAMP2//XBP1
GO:1901657	glycosyl_compound_metabolic_process	Biological Process	14	157	1086	18342	0.0824	0.548043	1.08407	1.50607	0.0128913	AHCY//ATIC//CAD//CTPS1//CTPS2//DERA//DHODH//GMPS//MACROD1//MOCOS//NMRK1//OARD1//PRTFDC1//UCK2
GO:0006323	DNA_packaging	Biological Process	16	185	1086	18342	0.0826281	0.548824	1.08287	1.46071	0.014733	ANP32B//ASF1B//CDAN1//CENPH//CENPK//CENPL//CHAF1A//CHAF1B//GATAD1//HP1BP3//ITGB3BP//MCM2//NASP//NCAPG2//RSF1//TSPYL4
GO:0032387	negative_regulation_of_intracellular_transport	Biological Process	7	64	1086	18342	0.0832344	0.551627	1.0797	1.84729	0.00644567	ARHGAP1//BARD1//DERL3//DMTN//FERMT1//TPR//UBE2G2
GO:0006518	peptide_metabolic_process	Biological Process	291	4582	1086	18342	0.0832729	0.551627	1.0795	1.07264	0.267956	AARS//ACY1//ADAMTS16//ADH5//AFG3L2//AIMP1//ALDH5A1//ALG10B//ANAPC16//APOL6//ASPH//ASPHD1//ATR//AXL//B4GALNT2//BACE2//BARD1//BRCA1//BRCC3//C1RL//C4BPB//CAD//CAMKK1//CAMKK2//CASP1//CASP4//CCNB1IP1//CDC42BPB//CDK5RAP3//CDK6//CHCHD4//CHMP4C//CLK2//CNTRL//CRTAP//CSF2RA//CSGALNACT1//DARS//DCAF10//DCAF8//DDIT3//DERL3//DESI1//DNAJB12//DPH5//DPH7//DPM3//DPP7//DTL//DTX3L//EEF1AKMT1//EEF1B2//EEF2//EEF2K//EE…
GO:0032269	negative_regulation_of_cellular_protein_metabolic_process	Biological Process	75	1081	1086	18342	0.0838435	0.554666	1.07653	1.1718	0.0690608	ADARB1//AGO4//ANXA8//BRCA1//C3orf33//C4BPB//C9orf72//CARD16//CDK5RAP3//CDK6//CIRBP//CNOT6L//COL7A1//CRTAP//DERL3//DHFR//DMTN//DTX3L//EIF2AK1//EIF3A//FAM129A//GBP1//HDAC6//HERPUD1//HMG20B//IGF2BP3//IKBKB//IPO7//IRAK3//KAT2B//LRRK1//MAP2K5//MECP2//NANOS3//NCL//NLE1//NOL3//NOP53//NUP62//OGT//PAPLN//PARP10//PARP14//PBLD//PMEPA1//PPM1F//PPP1R15A//PPP1R8//PRKCZ//PRKDC//PRMT3//RBM3//SERPINB1//SERPINH1//…
GO:0051289	protein_homotetramerization	Biological Process	8	77	1086	18342	0.0847338	0.559347	1.07194	1.75475	0.00736648	ALDH5A1//CBY1//DECR1//PFKL//SHMT2//SRR//THG1L//USP16
GO:0070126	mitochondrial_translational_termination	Biological Process	9	90	1086	18342	0.0847769	0.559347	1.07172	1.68895	0.00828729	MRPL2//MRPL21//MRPL24//MRPL33//MRPS18B//MRPS25//MRPS27//MRRF//OXA1L
GO:0060760	positive_regulation_of_response_to_cytokine_stimulus	Biological Process	6	52	1086	18342	0.0855135	0.559881	1.06797	1.94879	0.00552486	AXL//CASP1//CASP4//MAVS//PARP14//TRIM44
GO:0000096	sulfur_amino_acid_metabolic_process	Biological Process	5	40	1086	18342	0.0855359	0.559881	1.06785	2.11119	0.00460405	AHCY//CBS//CBSL//MTHFD1//MTR
GO:0000154	rRNA_modification	Biological Process	5	40	1086	18342	0.0855359	0.559881	1.06785	2.11119	0.00460405	EMG1//MRM1//NAT10//NOP56//TARBP1
GO:0042059	negative_regulation_of_epidermal_growth_factor_receptor_signaling_pathway	Biological Process	5	40	1086	18342	0.0855359	0.559881	1.06785	2.11119	0.00460405	HGS//NUP62//SNX5//SOCS4//TSG101
GO:0050881	musculoskeletal_movement	Biological Process	5	40	1086	18342	0.0855359	0.559881	1.06785	2.11119	0.00460405	EEF2//GAA//RPS6KB1//TNNC1//XRCC1
GO:0060351	cartilage_development_involved_in_endochondral_bone_morphogenesis	Biological Process	5	40	1086	18342	0.0855359	0.559881	1.06785	2.11119	0.00460405	COL7A1//POC1A//SCARA3//SERPINH1//THBS3
GO:0008380	RNA_splicing	Biological Process	31	405	1086	18342	0.0861229	0.56298	1.06488	1.29278	0.0285451	ARL6IP4//BUD13//CLNS1A//CPSF4//DDX42//DHX35//FIP1L1//GCFC2//GEMIN5//LSM8//LUC7L3//MBNL3//MTERF3//NOL3//PDCD7//PNN//POLR2D//PPP1R8//PRPF6//PSIP1//RAVER1//RAVER2//RBFOX2//RBM5//SRRM2//SRSF2//SRSF5//TSEN2//TTF2//ZCCHC8//ZRANB2
GO:0016567	protein_ubiquitination	Biological Process	48	663	1086	18342	0.086313	0.56325	1.06392	1.22277	0.0441989	ANAPC16//BARD1//BRCA1//CCNB1IP1//DCAF10//DCAF8//DTL//DTX3L//FANCL//FBXL16//FBXL20//FBXL4//FBXL5//FBXO17//FBXO4//FBXW4//FBXW8//FBXW9//HDAC6//HERC6//IPP//KBTBD11//KLHL31//KLHL35//LRSAM1//MAGEF1//NHLRC3//NSMCE1//PELI3//PEX14//PRKDC//RAD18//RBBP6//RBCK1//RNF146//RNF165//SKP2//SOCS4//THOP1//TMEM129//TRIM68//TSG101//UBA7//UBE2G2//UBE2V1//UBE2Z//UBE3B//ZNF738
GO:0000076	DNA_replication_checkpoint	Biological Process	3	18	1086	18342	0.0869598	0.56325	1.06068	2.81492	0.00276243	CDT1//NAE1//TIMELESS
GO:0000920	cell_separation_after_cytokinesis	Biological Process	3	18	1086	18342	0.0869598	0.56325	1.06068	2.81492	0.00276243	CHMP3//CHMP4C//MITD1
GO:0030970	retrograde_protein_transport,_ER_to_cytosol	Biological Process	3	18	1086	18342	0.0869598	0.56325	1.06068	2.81492	0.00276243	HERPUD1//HSP90B1//TMEM129
GO:0051383	kinetochore_organization	Biological Process	3	18	1086	18342	0.0869598	0.56325	1.06068	2.81492	0.00276243	CDT1//CENPH//CENPK
GO:1903541	regulation_of_exosomal_secretion	Biological Process	3	18	1086	18342	0.0869598	0.56325	1.06068	2.81492	0.00276243	CHMP3//HGS//TSG101
GO:2000641	regulation_of_early_endosome_to_late_endosome_transport	Biological Process	3	18	1086	18342	0.0869598	0.56325	1.06068	2.81492	0.00276243	CHMP3//RDX//VPS11
GO:0044089	positive_regulation_of_cellular_component_biogenesis	Biological Process	38	511	1086	18342	0.0873895	0.564492	1.05854	1.25597	0.0349908	AGRN//AMIGO1//ATR//BAIAP2L2//CDC42EP1//CDK5RAP2//CDT1//CEP295//CLDN1//CLIP1//CNOT6L//CYFIP1//DLG5//EEF2K//EPS8L2//ERCC1//FOSL1//GTF2H3//HDAC6//HGS//HRK//LIMS1//LRSAM1//MECP2//MNS1//MYO1C//NUP62//PHLDB2//PPM1F//RAB3GAP2//RHOBTB1//SLF2//TPR//TSG101//WASHC2C//WDR43//WIPF1//XPA
GO:0006402	mRNA_catabolic_process	Biological Process	18	215	1086	18342	0.0874941	0.564492	1.05802	1.414	0.0165746	AGO4//CNOT6L//DCP1B//DIS3L//EXOSC5//EXOSC6//EXOSC7//EXOSC8//MLH1//MRTO4//PAN2//POLR2D//RPL10A//RPL12//RPL14//RPL3//RPL4//UPF3A
GO:0051384	response_to_glucocorticoid	Biological Process	13	145	1086	18342	0.0887973	0.564492	1.0516	1.51423	0.0119705	ANXA3//ASS1//CAD//CLDN1//FECH//FOSL1//IGFBP7//MAOB//PCK2//PDCD7//RPS6KB1//TFAP4//TYMS
GO:0006839	mitochondrial_transport	Biological Process	19	230	1086	18342	0.0893963	0.564492	1.04868	1.39522	0.0174954	ABCB10//ACAA2//AFG3L2//AGK//CHCHD4//IMMP2L//MTX3//NOL3//RHOT1//SLC25A13//SLC25A14//SLC25A16//SLC25A26//SLC25A27//SLC25A40//SLC25A6//TIMM10B//TIMM9//TOMM20
GO:0010259	multicellular_organism_aging	Biological Process	4	29	1086	18342	0.0895591	0.564492	1.04789	2.32959	0.00368324	ERCC1//RAD54L//RNF165//WRN
GO:0042219	cellular_modified_amino_acid_catabolic_process	Biological Process	4	29	1086	18342	0.0895591	0.564492	1.04789	2.32959	0.00368324	AHCY//ALDH1L2//HOGA1//PM20D2
GO:0051984	positive_regulation_of_chromosome_segregation	Biological Process	4	29	1086	18342	0.0895591	0.564492	1.04789	2.32959	0.00368324	CDT1//RAD18//RCC2//SLF2
GO:1902751	positive_regulation_of_cell_cycle_G2|M_phase_transition	Biological Process	4	29	1086	18342	0.0895591	0.564492	1.04789	2.32959	0.00368324	DTL//MECP2//RCC2//STOX1
GO:1903432	regulation_of_TORC1_signaling	Biological Process	4	29	1086	18342	0.0895591	0.564492	1.04789	2.32959	0.00368324	C9orf72//LARS//SESN2//TELO2
GO:0006406	mRNA_export_from_nucleus	Biological Process	10	105	1086	18342	0.0925538	0.564492	1.03361	1.60852	0.0092081	CPSF4//FIP1L1//GLE1//NUP107//NUP210//NUP62//POLR2D//SRSF2//SRSF5//TPR
GO:0033683	nucleotide-excision_repair,_DNA_incision	Biological Process	5	41	1086	18342	0.0929172	0.564492	1.0319	2.0597	0.00460405	ERCC1//GTF2H3//POLD2//POLD3//XPA
GO:0006790	sulfur_compound_metabolic_process	Biological Process	28	364	1086	18342	0.0944347	0.564492	1.02487	1.29919	0.0257827	ACAT1//ACOT4//ACSL5//ACSM3//AHCY//ALDH5A1//ARSG//CBS//CBSL//CSAD//CSGALNACT1//ESD//GGCT//GSS//HLCS//HMGCL//MAT2A//MCCC1//MCCC2//MCEE//MTHFD1//MTR//PAPSS2//SLC26A2//ST3GAL3//STAT5B//SUCLG2//SULT1A1
GO:0043044	ATP-dependent_chromatin_remodeling	Biological Process	8	79	1086	18342	0.0950164	0.564492	1.0222	1.71033	0.00736648	ANP32B//CENPH//CENPK//CENPL//ITGB3BP//NASP//RSF1//SMARCE1
GO:0051260	protein_homooligomerization	Biological Process	24	305	1086	18342	0.0951702	0.564492	1.0215	1.32901	0.0220994	ACAT1//ALDH5A1//ATL3//ATXN10//BLM//CBY1//CEP57//CLDN1//DECR1//DGKD//GBP1//ITPR3//KCTD15//LONP1//LY6G5B//MLKL//PEX14//PFKL//RASEF//SHMT2//SIGMAR1//SRR//THG1L//USP16
GO:0000733	DNA_strand_renaturation	Biological Process	2	9	1086	18342	0.0955885	0.564492	1.01959	3.75322	0.00184162	BLM//RAD54L
GO:0001672	regulation_of_chromatin_assembly_or_disassembly	Biological Process	2	9	1086	18342	0.0955885	0.564492	1.01959	3.75322	0.00184162	PARP10//TPR
GO:0006002	fructose_6-phosphate_metabolic_process	Biological Process	2	9	1086	18342	0.0955885	0.564492	1.01959	3.75322	0.00184162	GFPT1//PFKL
GO:0010603	regulation_of_cytoplasmic_mRNA_processing_body_assembly	Biological Process	2	9	1086	18342	0.0955885	0.564492	1.01959	3.75322	0.00184162	ATXN2//CNOT6L
GO:0010835	regulation_of_protein_ADP-ribosylation	Biological Process	2	9	1086	18342	0.0955885	0.564492	1.01959	3.75322	0.00184162	KAT2B//XRCC1
GO:0019695	choline_metabolic_process	Biological Process	2	9	1086	18342	0.0955885	0.564492	1.01959	3.75322	0.00184162	ALDH7A1//CHDH
GO:0031936	negative_regulation_of_chromatin_silencing	Biological Process	2	9	1086	18342	0.0955885	0.564492	1.01959	3.75322	0.00184162	ATAD2//PHF2
GO:0032383	regulation_of_intracellular_cholesterol_transport	Biological Process	2	9	1086	18342	0.0955885	0.564492	1.01959	3.75322	0.00184162	ARV1//LDLRAP1
GO:0032875	regulation_of_DNA_endoreduplication	Biological Process	2	9	1086	18342	0.0955885	0.564492	1.01959	3.75322	0.00184162	MRE11//SMC1A
GO:0033313	meiotic_cell_cycle_checkpoint	Biological Process	2	9	1086	18342	0.0955885	0.564492	1.01959	3.75322	0.00184162	HORMAD1//TRIP13
GO:0034770	histone_H4-K20_methylation	Biological Process	2	9	1086	18342	0.0955885	0.564492	1.01959	3.75322	0.00184162	KMT5A//NSD2
GO:0035947	regulation_of_gluconeogenesis_by_regulation_of_transcription_from_RNA_polymerase_II_promoter	Biological Process	2	9	1086	18342	0.0955885	0.564492	1.01959	3.75322	0.00184162	KAT2B//WDR5
GO:0046130	purine_ribonucleoside_catabolic_process	Biological Process	2	9	1086	18342	0.0955885	0.564492	1.01959	3.75322	0.00184162	AHCY//PRTFDC1
GO:0071233	cellular_response_to_leucine	Biological Process	2	9	1086	18342	0.0955885	0.564492	1.01959	3.75322	0.00184162	LARS//SESN2
GO:1903044	protein_localization_to_membrane_raft	Biological Process	2	9	1086	18342	0.0955885	0.564492	1.01959	3.75322	0.00184162	CLIP1//FLOT2
GO:1903265	positive_regulation_of_tumor_necrosis_factor-mediated_signaling_pathway	Biological Process	2	9	1086	18342	0.0955885	0.564492	1.01959	3.75322	0.00184162	CASP1//CASP4
GO:1904153	negative_regulation_of_retrograde_protein_transport,_ER_to_cytosol	Biological Process	2	9	1086	18342	0.0955885	0.564492	1.01959	3.75322	0.00184162	DERL3//UBE2G2
GO:1904263	positive_regulation_of_TORC1_signaling	Biological Process	2	9	1086	18342	0.0955885	0.564492	1.01959	3.75322	0.00184162	LARS//TELO2
GO:1904354	negative_regulation_of_telomere_capping	Biological Process	2	9	1086	18342	0.0955885	0.564492	1.01959	3.75322	0.00184162	ERCC1//XRCC1
GO:1904779	regulation_of_protein_localization_to_centrosome	Biological Process	2	9	1086	18342	0.0955885	0.564492	1.01959	3.75322	0.00184162	CEP250//NUP62
GO:1901991	negative_regulation_of_mitotic_cell_cycle_phase_transition	Biological Process	15	175	1086	18342	0.095986	0.564492	1.01779	1.44767	0.0138122	BLM//BRCA1//CDK5RAP3//CHMP4C//CNOT6L//DONSON//FANCI//MRE11//NAE1//NOP53//PRKDC//RBL1//TPR//TPRA1//TRIP13
GO:0031667	response_to_nutrient_levels	Biological Process	35	471	1086	18342	0.0982674	0.564492	1.00759	1.25506	0.0322284	AACS//ACAT1//AHCY//ASNS//ASS1//BRIP1//CAD//CASP1//DDIT3//DHODH//EEF2//EIF2AK1//ERCC1//FADS1//HLCS//HMGCL//HSP90B1//LARS//MGMT//MYBBP1A//NUAK2//OGT//PCK2//RMI1//RPS6KB1//SESN2//SORD//SRSF2//STC2//TBL2//TYMS//UFL1//ULK2//WRN//XBP1
GO:0046164	alcohol_catabolic_process	Biological Process	6	54	1086	18342	0.098459	0.564492	1.00674	1.87661	0.00552486	ALDH3B1//GK5//NUDT3//OCRL//SORD//SULT1A1
GO:0000083	regulation_of_transcription_involved_in_G1|S_transition_of_mitotic_cell_cycle	Biological Process	4	30	1086	18342	0.0987393	0.564492	1.00551	2.25193	0.00368324	CDT1//DHFR//RRM2//TYMS
GO:0003009	skeletal_muscle_contraction	Biological Process	4	30	1086	18342	0.0987393	0.564492	1.00551	2.25193	0.00368324	EEF2//GAA//RPS6KB1//TNNC1
GO:0003417	growth_plate_cartilage_development	Biological Process	4	30	1086	18342	0.0987393	0.564492	1.00551	2.25193	0.00368324	COL7A1//POC1A//SCARA3//THBS3
GO:0006359	regulation_of_transcription_by_RNA_polymerase_III	Biological Process	4	30	1086	18342	0.0987393	0.564492	1.00551	2.25193	0.00368324	BRCA1//GTF3C3//ZC3H8//ZNF76
GO:0006448	regulation_of_translational_elongation	Biological Process	3	19	1086	18342	0.0989152	0.564492	1.00474	2.66676	0.00276243	DPH5//DPH7//USP16
GO:0009263	deoxyribonucleotide_biosynthetic_process	Biological Process	3	19	1086	18342	0.0989152	0.564492	1.00474	2.66676	0.00276243	RRM1//RRM2//TYMS
GO:1902882	regulation_of_response_to_oxidative_stress	Biological Process	9	93	1086	18342	0.0991293	0.564492	1.0038	1.63447	0.00828729	DHFR//HDAC6//NOL3//PAWR//SELENON//SESN2//STOX1//TLDC1//TRAP1

## Sheet: BP-up
Column "ID" stands for the ID of gene ontology term
Column "Term" stands for the name of gene ontology term
Column "Ontology" stands for the class of ontology
Column "Count" stands for the number of DE genes associated with the term
Column "Size" stands for the number of background population genes associated with the term
Column "numInt" stands for the total number of DE genes
Column "numTotal" stands for the total number of background population genes
Column "p_value" stands for the fisher exact test value of the term
Column "fdr" stands for the false discovery rate of the term, using Benjamini & Hochberg (1995) method
Column "Enrichment_Score" stands for the Enrichment Score value of the term, it equals (-log10(Pvalue))
Column "Fold_Enrichment" stands for the Fold Enrichment value of the term, it equals (Count/Size)/(numInt/numTotal)
Column "GeneRatio" stands for the Gene Ratio value genes associated with the term, it equals (Count/numInt)
Column "Genes" stands for the DE genes associated with the term
ID	Term	Ontology	Count	Size	numInt	numTotal	p_value	fdr	Enrichment_Score	Fold_Enrichment	GeneRatio	Genes
GO:0010033	response_to_organic_substance	Biological Process	375	2889	1492	18342	9.16242e-23	6.23869e-19	22.038	1.59574	0.25134	ABCC2//ABCG1//ACSL1//ACVR1//ADIPOR2//ADRB2//AKR1B1//AKR1C1//AKR1C2//AKR1C3//ANG//ANXA1//APC//APLP1//APP//AQP1//AQP3//ARID5B//ARNT2//ARRB2//ASIC1//ATP1A1//ATP1A3//ATP6V0A1//ATP6V0B//ATP6V0C//ATP6V0D1//ATP6V0E1//ATP6V1A//ATP7A//B3GNT2//BAK1//BCAR1//BCL10//BCL6//BDNF//BMP4//BMP6//BSG//BST2//BTG1//CACNA1H//CALB1//CAMK2G//CAV1//CCL2//CCL26//CCNB1//CCRL2//CD14//CD58//CD70//CD81//CD83//CD9//CDC42EP2//CD…
GO:0009653	anatomical_structure_morphogenesis	Biological Process	285	2097	1492	18342	1.00729e-19	3.42933e-16	18.9968	1.6708	0.191019	ACVR1//ADAMTS1//ADAMTS5//ADGRG1//ADIPOR2//ANG//ANGPTL4//APLP1//APP//AQP1//AQP3//ARC//ARID5B//ARL6//ARTN//ATP7A//AURKA//AXIN2//B3GNT2//B4GAT1//BAK1//BCAR3//BCL10//BCL6//BDNF//BHLHE41//BMP4//BMP6//BSG//C16orf45//CACNA1H//CALB1//CAMSAP3//CAP1//CAV1//CCL2//CD9//CDH17//CDH24//CDH5//CDK5//CDON//CEACAM1//CEBPB//CFL1//CHUK//CLU//CNNM4//COL15A1//COL1A1//COL21A1//COL3A1//COL4A1//COL6A2//COL8A2//CPE//CRABP2…
GO:0071310	cellular_response_to_organic_substance	Biological Process	303	2285	1492	18342	2.08029e-19	4.72156e-16	18.6819	1.63018	0.203083	ABCC2//ACSL1//ACVR1//ADIPOR2//ADRB2//AKR1B1//AKR1C1//AKR1C2//AKR1C3//ANXA1//APC//APLP1//APP//AQP1//ARID5B//ARRB2//ATP1A1//ATP1A3//ATP6V0A1//ATP6V0B//ATP6V0C//ATP6V0D1//ATP6V0E1//ATP6V1A//ATP7A//B3GNT2//BCAR1//BCL6//BDNF//BMP4//BMP6//BST2//CACNA1H//CALB1//CAMK2G//CAV1//CCL2//CCL26//CCNB1//CCRL2//CD14//CD58//CD70//CDC42EP2//CDC42EP4//CDH5//CDK19//CDK5//CDK9//CEACAM1//CEBPA//CEBPB//CFL1//CGN//CHRM4/…
GO:0023051	regulation_of_signaling	Biological Process	417	3585	1492	18342	1.62224e-16	2.24459e-13	15.7899	1.42996	0.279491	ABHD6//ABRACL//ACPP//ACVR1//ADGRG1//ADORA1//ADRA1B//ADRA2B//ADRB2//AFAP1L2//AGPAT2//AKAP5//AKR1B1//AKR1C2//AKR1C3//ALOX12B//ANXA1//AP1AR//APC//APLP1//APP//ARC//ARHGAP31//ARHGAP40//ARHGAP5//ARHGDIB//ARHGEF12//ARHGEF25//ARL6//ARNTL//ARRB1//ARRB2//ARTN//ASIC1//ATP2A3//ATP6V0C//AURKA//AXIN2//BAK1//BAMBI//BCAP31//BCAR3//BCL10//BCL2L12//BCL6//BDKRB2//BDNF//BMF//BMP4//BMP6//BST2//C1QL4//C3orf58//CALB1//…
GO:0048731	system_development	Biological Process	481	4282	1492	18342	1.64825e-16	2.24459e-13	15.783	1.38094	0.322386	ACVR1//ADAM22//ADAMTS1//ADAMTS4//ADAMTS5//ADGRB2//ADGRG1//ADIPOR2//ADORA1//ADRA2B//AKR1B1//AKR1C3//ALOX12B//ANG//ANGPTL4//ANXA1//APLP1//APP//AQP1//AQP3//ARC//ARG2//ARHGAP5//ARID5B//ARL6//ARNT2//ARNTL//ARRB1//ARRB2//ARTN//ATG5//ATP11C//ATP6V0D1//ATP7A//AURKA//AXIN2//B3GNT2//B4GAT1//BAG3//BAK1//BCAR3//BCL10//BCL6//BDNF//BHLHE41//BICDL1//BMP4//BMP6//BPNT1//BSG//BTD//C16orf45//C3orf58//CACNA1H//CALB1…
GO:0009966	regulation_of_signal_transduction	Biological Process	382	3222	1492	18342	2.73862e-16	3.10788e-13	15.5625	1.45752	0.256032	ABHD6//ABRACL//ACPP//ACVR1//ADGRG1//ADORA1//ADRA1B//ADRA2B//ADRB2//AFAP1L2//AGPAT2//AKAP5//AKR1B1//AKR1C2//AKR1C3//ALOX12B//APC//APLP1//APP//ARC//ARHGAP31//ARHGAP40//ARHGAP5//ARHGDIB//ARHGEF12//ARHGEF25//ARL6//ARNTL//ARRB1//ARRB2//ARTN//ATP6V0C//AURKA//AXIN2//BAK1//BAMBI//BCAP31//BCAR3//BCL10//BCL2L12//BCL6//BDKRB2//BDNF//BMF//BMP4//BMP6//BST2//C1QL4//C3orf58//CARD19//CASTOR2//CAV1//CBLB//CCL2//C…
GO:0007275	multicellular_organism_development	Biological Process	531	4895	1492	18342	1.82935e-15	1.77943e-12	14.7377	1.33358	0.355898	ACVR1//ADAM22//ADAMTS1//ADAMTS4//ADAMTS5//ADGRB2//ADGRG1//ADIPOR2//ADORA1//ADRA1B//ADRA2B//AKR1B1//AKR1C3//ALOX12B//ANG//ANGPTL4//ANXA1//APC//APLP1//APOL2//APP//AQP1//AQP3//ARC//ARG2//ARHGAP5//ARHGDIB//ARID5B//ARL6//ARNT2//ARNTL//ARRB1//ARRB2//ARTN//ATG5//ATP11C//ATP6V0D1//ATP7A//AURKA//AXIN2//B3GNT2//B4GAT1//BAG3//BAK1//BCAR3//BCL10//BCL6//BDNF//BHLHE41//BICDL1//BMP4//BMP6//BPNT1//BSG//BST2//BTD…
GO:0032502	developmental_process	Biological Process	595	5636	1492	18342	3.0594e-15	2.60393e-12	14.5144	1.29785	0.398794	ACVR1//ADAM22//ADAMTS1//ADAMTS4//ADAMTS5//ADGRB2//ADGRG1//ADIPOR2//ADORA1//ADRA1B//ADRA2B//ADRB2//AGPAT2//AKR1B1//AKR1C1//AKR1C2//AKR1C3//ALDOC//ALOX12B//ANG//ANGPTL4//ANXA1//APC//APLP1//APOL2//APP//AQP1//AQP3//ARC//ARG2//ARHGAP5//ARHGDIB//ARID5B//ARL6//ARNT2//ARNTL//ARRB1//ARRB2//ARTN//ATG5//ATP11C//ATP6V0D1//ATP7A//AURKA//AXIN2//B3GNT2//B4GAT1//BAG3//BAK1//BBS9//BCAR3//BCL10//BCL6//BDNF//BHLHE4…
GO:0048856	anatomical_structure_development	Biological Process	563	5283	1492	18342	5.11451e-15	3.86941e-12	14.2912	1.3101	0.377346	ACVR1//ADAM22//ADAMTS1//ADAMTS4//ADAMTS5//ADGRB2//ADGRG1//ADIPOR2//ADORA1//ADRA1B//ADRA2B//AGPAT2//AKR1B1//AKR1C1//AKR1C2//AKR1C3//ALDOC//ALOX12B//ANG//ANGPTL4//ANXA1//APC//APLP1//APOL2//APP//AQP1//AQP3//ARC//ARG2//ARHGAP5//ARHGDIB//ARID5B//ARL6//ARNT2//ARNTL//ARRB1//ARRB2//ARTN//ATG5//ATP11C//ATP6V0D1//ATP7A//AURKA//AXIN2//B3GNT2//B4GAT1//BAG3//BAK1//BCAR3//BCL10//BCL6//BDNF//BHLHE41//BICDL1//BM…
GO:0001944	vasculature_development	Biological Process	92	498	1492	18342	5.2405e-14	3.51674e-11	13.2806	2.2711	0.0616622	ACVR1//ADGRG1//ADIPOR2//ANG//ANGPTL4//ATP7A//BAK1//BMP4//CAV1//CCL2//CDH5//CEACAM1//COL15A1//COL1A1//COL3A1//COL4A1//COL8A2//CRKL//CXCL8//CYR61//DAB2IP//DHCR7//DLL4//DLX3//ECM1//EDN1//EFNB2//EGFL7//EGR1//EGR3//EPHB3//EPHB4//EREG//ERRFI1//FGF18//FGFR1//FGFR4//FOXC2//FOXF1//FOXO1//FZD4//GPR4//HIF1A//HMOX1//HOXB13//HPGD//HS6ST1//ITGA5//ITGAV//ITGB3//JMJD6//JUN//KLF5//LOX//LRP1//LTBP1//LUZP1//MFGE8//…
GO:0001568	blood_vessel_development	Biological Process	89	476	1492	18342	6.66894e-14	3.51674e-11	13.1759	2.29859	0.0596515	ACVR1//ADGRG1//ADIPOR2//ANG//ANGPTL4//ATP7A//BAK1//BMP4//CAV1//CCL2//CDH5//CEACAM1//COL15A1//COL1A1//COL3A1//COL4A1//COL8A2//CRKL//CXCL8//CYR61//DAB2IP//DHCR7//DLL4//DLX3//ECM1//EDN1//EFNB2//EGFL7//EGR1//EGR3//EPHB3//EPHB4//EREG//FGF18//FGFR1//FGFR4//FOXC2//FOXF1//FOXO1//FZD4//GPR4//HIF1A//HMOX1//HOXB13//HPGD//HS6ST1//ITGA5//ITGAV//ITGB3//JMJD6//JUN//KLF5//LOX//LRP1//LTBP1//LUZP1//MFGE8//MMP14//M…
GO:0072358	cardiovascular_system_development	Biological Process	93	508	1492	18342	6.67655e-14	3.51674e-11	13.1754	2.25059	0.0623324	ACVR1//ADGRG1//ADIPOR2//ANG//ANGPTL4//ATP7A//BAK1//BMP4//CAV1//CCL2//CDH5//CEACAM1//COL15A1//COL1A1//COL3A1//COL4A1//COL8A2//CRKL//CXCL8//CYR61//DAB2IP//DHCR7//DLL4//DLX3//ECM1//EDN1//EFNB2//EGFL7//EGR1//EGR3//EPHB3//EPHB4//EREG//ERRFI1//FGF18//FGFR1//FGFR4//FOXC2//FOXF1//FOXO1//FZD4//GPR4//HIF1A//HMOX1//HOXB13//HPGD//HS6ST1//ITGA5//ITGAV//ITGB3//JMJD6//JUN//KLF5//LOX//LRP1//LTBP1//LUZP1//MFGE8//…
GO:0035295	tube_development	Biological Process	128	803	1492	18342	6.71429e-14	3.51674e-11	13.173	1.95962	0.0857909	ACVR1//ADGRG1//ADIPOR2//AKR1B1//ANG//ANGPTL4//ARG2//ATP7A//BAK1//BCL10//BMP4//CALB1//CAV1//CCL2//CCNB1//CDH5//CEACAM1//CEBPA//CFL1//CIC//COL15A1//COL3A1//COL4A1//COL8A2//CRISPLD2//CRLF1//CXCL8//CYP1A1//CYR61//DAB2IP//DHCR7//DLL4//ECM1//EDN1//EFNB2//EGFL7//EGR3//EN1//EPHB3//EPHB4//EREG//ERRFI1//FAM212A//FGF18//FGFR1//FGFR4//FOXC2//FOXF1//FOXL1//FZD4//GATA2//GATA5//GDF11//GPR4//HIF1A//HLX//HMOX1//H…
GO:0048646	anatomical_structure_formation_involved_in_morphogenesis	Biological Process	133	858	1492	18342	1.80628e-13	8.78497e-11	12.7432	1.90565	0.0891421	ACVR1//ADAMTS1//ADGRG1//ADIPOR2//ANG//ANGPTL4//ARL6//ATP7A//AXIN2//BCL10//BCL6//BHLHE41//BMP4//C16orf45//CACNA1H//CALB1//CAV1//CCL2//CD9//CDH5//CDK5//CDON//CEACAM1//CFL1//CNNM4//COL15A1//COL1A1//COL4A1//COL8A2//CXCL8//CYR61//DAB2IP//DLL4//ECM1//EDN1//EFNB2//EGFL7//EGR3//EPHB3//EPHB4//EREG//EXT2//FGF18//FGFR1//FGFR4//FOXC2//FOXF1//FOXO1//GATA2//GATA5//GPR4//HES2//HIF1A//HMOX1//HOXA11//HOXB13//HS6S…
GO:0048514	blood_vessel_morphogenesis	Biological Process	75	390	1492	18342	1.54022e-12	6.99157e-10	11.8124	2.36415	0.0502681	ACVR1//ADGRG1//ADIPOR2//ANG//ANGPTL4//BAK1//BMP4//CAV1//CCL2//CDH5//CEACAM1//COL15A1//COL3A1//COL4A1//COL8A2//CXCL8//CYR61//DAB2IP//DLL4//ECM1//EDN1//EFNB2//EGFL7//EGR3//EPHB3//EPHB4//EREG//FGF18//FGFR1//FGFR4//FOXC2//FOXF1//FZD4//GPR4//HIF1A//HMOX1//HOXB13//HPGD//HS6ST1//ITGA5//ITGAV//ITGB3//JMJD6//JUN//KLF5//LOX//LRP1//MFGE8//MMP14//MMP2//NOG//NOTCH3//NR4A1//NRP2//PDCL3//PGF//PRDM1//PTGS2//RAPG…
GO:0009888	tissue_development	Biological Process	218	1701	1492	18342	2.33931e-12	9.95523e-10	11.6309	1.57554	0.146113	ACVR1//AGPAT2//AKR1C1//AKR1C2//AKR1C3//ALDOC//ANXA1//ARC//ARG2//ARID5B//ARTN//ATG5//ATP7A//AXIN2//BCL10//BHLHE41//BMP4//BMP6//BSG//C3orf58//CALB1//CAMSAP3//CAV1//CCNB1//CDK5//CDON//CEACAM1//CEBPB//CES1//CFL1//CNN3//CNNM4//COL1A1//COL21A1//COL3A1//COL4A1//COL6A2//CRABP2//CRLF1//CTSV//CYP1A1//CYP26B1//CYR61//DHCR24//DHRS9//DLL4//DLX2//DLX3//DNER//ECM1//EDN1//EFNB1//EGR1//EHF//ELF3//EN1//ENO3//EPOR/…
GO:0042127	regulation_of_cell_proliferation	Biological Process	219	1713	1492	18342	2.6321e-12	1.05423e-09	11.5797	1.57168	0.146783	ADAMTS1//ADGRG1//ADORA1//AKR1B1//AKR1C2//AKR1C3//ANG//ANXA1//APC//APP//AQP1//ARG2//ARNT2//ARRB1//ATP7A//AXIN2//BAK1//BAMBI//BCL6//BMP4//BMP6//BRICD5//BTG1//C1QL4//CAV1//CCL2//CCL26//CCNB1//CCNB3//CCND2//CCND3//CCNF//CCNG2//CCPG1//CD320//CD81//CD9//CDC20//CDH5//CDKN1C//CDKN2B//CDKN2D//CDON//CEACAM1//CEBPA//CEBPB//CGA//CNTFR//CRKL//CRLF1//CSF2//CTSV//CXCL8//CYR61//DAB2IP//DDAH1//DHCR24//DHCR7//DLL4…
GO:0050896	response_to_stimulus	Biological Process	821	8524	1492	18342	3.09381e-12	1.17032e-09	11.5095	1.18407	0.550268	AADAC//ABCC2//ABCF1//ABCG1//ABTB2//ACPP//ACSL1//ACTR5//ACVR1//ADAMTS1//ADAMTS5//ADGRB2//ADGRG1//ADGRL1//ADIPOR2//ADORA1//ADRA1B//ADRA2B//ADRB2//AFAP1L2//AGPAT2//AKAP5//AKR1B1//AKR1C1//AKR1C2//AKR1C3//ALDOC//ANG//ANGPTL4//ANXA1//ANXA11//ANXA6//AOC2//AP1S1//AP2S1//APC//APLP1//APOBEC3C//APOL2//APP//AQP1//AQP3//ARG2//ARHGAP31//ARHGAP40//ARHGAP5//ARHGDIB//ARHGEF12//ARHGEF25//ARID5B//ARL6//ARNT2//ARNTL…
GO:0050790	regulation_of_catalytic_activity	Biological Process	282	2379	1492	18342	8.24715e-12	2.95552e-09	11.0837	1.45724	0.189008	ACSL1//ADORA1//ADRA2B//ADRB2//ADRM1//AFAP1L2//AGFG2//AKAP5//ANG//ANGPTL4//ANXA1//APC//APP//AQP1//ARHGAP31//ARHGAP40//ARHGAP5//ARHGDIB//ARHGEF12//ARL6IP1//ARRB1//ARRB2//ATP1B1//ATP1B2//ATP1B3//ATP7A//AXIN2//AZIN2//BAG3//BAK1//BCAP31//BCL10//BCL2L12//BCL6//BDNF//BMP4//BST2//C15orf62//CAMK2N2//CAMSAP3//CAP1//CAV1//CBLB//CCL2//CCL26//CCNB1//CCNB3//CCND2//CCND3//CCNF//CCNG2//CD81//CDC20//CDC42EP2//CDC…
GO:0009967	positive_regulation_of_signal_transduction	Biological Process	203	1583	1492	18342	1.4512e-11	4.94062e-09	10.8383	1.5765	0.136059	ACPP//ACVR1//ADGRG1//ADORA1//ADRA1B//ADRA2B//ADRB2//AFAP1L2//AGPAT2//AKR1B1//AKR1C2//AKR1C3//ALOX12B//APP//ARC//ARNTL//ARRB1//ARRB2//ATP6V0C//AXIN2//BAK1//BAMBI//BCAP31//BCAR3//BCL10//BDNF//BMF//BMP4//BMP6//BST2//CAV1//CCL2//CCL26//CD14//CD63//CD81//CDK5//CDKN1C//CDKN2B//CDON//CHUK//COL1A1//COL3A1//CRKL//CRLF1//CSF2//CXCR4//CYR61//DAB2IP//DEDD2//DIRAS1//DIXDC1//DLL4//DUSP6//DUSP9//ECM1//EDN1//EFN…
GO:0030154	cell_differentiation	Biological Process	397	3634	1492	18342	1.87724e-11	6.08673e-09	10.7265	1.34302	0.266086	ACVR1//ADAM22//ADGRG1//ADRA2B//ADRB2//AKR1C1//AKR1C2//AKR1C3//ALDOC//ANG//ANGPTL4//ANXA1//APC//APP//ARC//ARID5B//ARL6//ARNTL//ARTN//ATG5//ATP11C//ATP7A//AURKA//AXIN2//B3GNT2//B4GAT1//BAK1//BBS9//BCL6//BDNF//BHLHE41//BICDL1//BMP4//BMP6//C16orf45//CACNA1H//CAMK1D//CAMK2G//CAMSAP3//CASZ1//CAV1//CBX6//CCL2//CCNB1//CD63//CD79B//CD9//CDC20//CDH17//CDK5//CDKL5//CDKN2B//CDON//CEBPA//CEBPB//CES1//CFL1//CH…
GO:0001525	angiogenesis	Biological Process	61	303	1492	18342	2.6776e-11	8.28717e-09	10.5723	2.47494	0.0408847	ACVR1//ADGRG1//ADIPOR2//ANG//ANGPTL4//BMP4//CAV1//CCL2//CDH5//CEACAM1//COL15A1//COL4A1//COL8A2//CXCL8//CYR61//DAB2IP//DLL4//ECM1//EDN1//EFNB2//EGFL7//EGR3//EPHB3//EPHB4//EREG//FGF18//FGFR1//FGFR4//FOXC2//GPR4//HIF1A//HMOX1//HOXB13//HS6ST1//ITGA5//ITGAV//ITGB3//JMJD6//JUN//KLF5//MFGE8//MMP14//MMP2//NOTCH3//NR4A1//NRP2//PDCL3//PGF//PTGS2//RAPGEF3//RBM15//RHOB//S1PR1//SLC12A6//TGFB2//TMEM2//TSPAN12/…
GO:0046903	secretion	Biological Process	151	1089	1492	18342	3.04318e-11	9.00914e-09	10.5167	1.70462	0.101206	ABCC2//ACPP//AGPAT2//ALDOC//ANXA1//APP//AQP1//ARL4D//ATP6V0A1//ATP6V0C//ATP7A//ATP8A1//BDKRB2//BST2//C2CD4C//CAMK2G//CAP1//CAV1//CD14//CD58//CD63//CD9//CDK5//CEACAM1//CLU//CMTM6//CREB3L1//CRISPLD2//CSF2//CTSD//CYSTM1//DGAT1//DOK3//DYNLL1//ECM1//EDN1//F2RL1//FABP5//FFAR4//FKBP1B//FURIN//FZD4//GAL//GGH//GHDC//GLA//GLIPR1//GLS//GM2A//GMFG//GNPTAB//GOLGA7//GSN//HAP1//HIF1A//HSP90AA1//HSPA1A//HSPA1B//…
GO:0007154	cell_communication	Biological Process	581	5745	1492	18342	4.5505e-11	1.29101e-08	10.3419	1.24327	0.38941	ACSL1//ACVR1//ADAMTS1//ADGRB2//ADGRG1//ADGRL1//ADIPOR2//ADORA1//ADRA1B//ADRA2B//ADRB2//AKAP5//AKR1B1//AKR1C2//AKR1C3//ANG//ANXA1//ANXA6//AP2S1//APC//APP//AQP3//ARHGAP31//ARHGAP40//ARHGAP5//ARHGDIB//ARHGEF12//ARHGEF25//ARID5B//ARL6//ARRB1//ARRB2//ARTN//ASB6//ASIC1//ATG5//ATP1A1//ATP1A3//ATP1B1//ATP1B2//ATP6V0A1//ATP6V0B//ATP6V0C//ATP6V0D1//ATP6V0E1//ATP6V1A//AURKA//AXIN2//BAG3//BAK1//BCAP31//BCAR1…
GO:0009887	animal_organ_morphogenesis	Biological Process	130	902	1492	18342	6.18288e-11	1.68397e-08	10.2088	1.7718	0.0871314	ACVR1//ADAMTS1//ADAMTS5//APLP1//AQP1//AQP3//ARID5B//ARL6//AXIN2//BAK1//BCAR3//BHLHE41//BMP4//BMP6//BSG//CALB1//CAV1//CCL2//CDON//CEBPB//CNNM4//COL1A1//COL21A1//COL3A1//COL6A2//COL8A2//CPE//CRKL//CSRNP1//CYP26B1//CYR61//DIO3//DLL4//DLX2//DLX3//EDN1//ELF3//EPHB4//EREG//ERRFI1//FGF18//FGFR1//FHL1//FOXC2//FOXF1//FOXO1//GATA2//GATA5//GCNT3//GDF11//HIF1A//HLX//HMX2//HMX3//HOXA11//HOXB13//HOXB4//HOXC11/…
GO:0007166	cell_surface_receptor_signaling_pathway	Biological Process	287	2482	1492	18342	8.55565e-11	2.24059e-08	10.0677	1.42154	0.192359	ACSL1//ACVR1//ADAMTS1//ADGRB2//ADGRG1//ADGRL1//ADIPOR2//ADORA1//ADRB2//ANXA1//AP2S1//APC//APP//ARID5B//ARL6//ARRB2//ATP6V0A1//ATP6V0B//ATP6V0C//ATP6V0D1//ATP6V0E1//ATP6V1A//AXIN2//BAG3//BAK1//BCAR1//BCL10//BCL6//BDKRB2//BDNF//BHLHE41//BMP4//BMP6//BSG//BST2//BTN2A1//CAMK2G//CAV1//CBLB//CCL2//CCL26//CCRL2//CD101//CD14//CD63//CD7//CD70//CD79B//CD81//CD82//CD9//CDH17//CDH5//CDK5//CDON//CEACAM1//CEBPA…
GO:0045595	regulation_of_cell_differentiation	Biological Process	213	1719	1492	18342	1.05139e-10	2.65144e-08	9.97824	1.52329	0.142761	ABCG1//ACVR1//ADGRG1//ADRA2B//ANXA1//AP1AR//APC//APP//AQP3//ARC//ARNTL//ARRB2//ATP11C//AURKA//AXIN2//BAMBI//BCL6//BDNF//BHLHE41//BMP4//BMP6//BTG1//C16orf45//C1QL4//CAMK1D//CARMIL1//CASZ1//CAV1//CD101//CD83//CDC20//CDH5//CDK5//CDK9//CDKL5//CDON//CEACAM1//CEBPA//CEBPB//CFL1//COL1A1//COL3A1//CRABP2//CRKL//CRMP1//CSF2//CTSL//CTSV//CXCL14//CXCR4//CYP26B1//CYR61//DAB2IP//DBN1//DIXDC1//DLL4//DLX2//DPYSL…
GO:0032940	secretion_by_cell	Biological Process	137	978	1492	18342	1.34856e-10	3.2794e-08	9.87013	1.7221	0.0918231	ACPP//AGPAT2//ALDOC//ANXA1//APP//ARL4D//ATP6V0A1//ATP6V0C//ATP8A1//BST2//C2CD4C//CAMK2G//CAP1//CD14//CD58//CD63//CD9//CDK5//CEACAM1//CLU//CMTM6//CREB3L1//CRISPLD2//CTSD//CYSTM1//DGAT1//DOK3//DYNLL1//ECM1//EDN1//F2RL1//FABP5//FFAR4//FKBP1B//FURIN//FZD4//GAL//GGH//GHDC//GLA//GLIPR1//GLS//GM2A//GMFG//GNPTAB//GOLGA7//GSN//HAP1//HSP90AA1//HSPA1A//HSPA1B//IDH1//IGF2//IQGAP2//ITGAV//ITGB3//LGI3//LHFPL2/…
GO:0035239	tube_morphogenesis	Biological Process	98	625	1492	18342	1.70307e-10	3.99868e-08	9.76877	1.92763	0.0656836	ACVR1//ADGRG1//ADIPOR2//ANG//ANGPTL4//BAK1//BCL10//BMP4//CAV1//CCL2//CDH5//CEACAM1//CFL1//COL15A1//COL3A1//COL4A1//COL8A2//CXCL8//CYR61//DAB2IP//DLL4//ECM1//EDN1//EFNB2//EGFL7//EGR3//EPHB3//EPHB4//EREG//FGF18//FGFR1//FGFR4//FOXC2//FOXF1//FZD4//GPR4//HIF1A//HLX//HMOX1//HOXA11//HOXB13//HPGD//HS6ST1//ID2//ILK//ITGA5//ITGAV//ITGB3//JMJD6//JUN//KAT2A//KDM5B//KLF5//LHX2//LOX//LRP1//LUZP1//MFGE8//MMP14/…
GO:0034097	response_to_cytokine	Biological Process	142	1032	1492	18342	2.14873e-10	4.84462e-08	9.66782	1.69156	0.0951743	ABCC2//ACSL1//ADIPOR2//ANXA1//ARID5B//B3GNT2//BCL6//BST2//CAMK2G//CCL2//CCL26//CCRL2//CD14//CD58//CD70//CDC42EP2//CDC42EP4//CDK9//CEACAM1//CEBPA//CEBPB//CFL1//CHUK//CNTFR//COL1A1//COL3A1//CRKL//CRLF1//CSF2//CXCL8//CXCR4//DAB2IP//EDN1//EGR1//EPOR//EREG//ETV3//FASN//FOS//FOXF1//FOXO1//FSCN1//FZD4//GBP2//GFPT2//GPR17//GPR75//GSN//HIF1A//HLA-A//HLA-B//HMOX1//HSP90AA1//HYAL2//IFI30//IFIT1//IL13RA2//IL…
GO:0040012	regulation_of_locomotion	Biological Process	137	985	1492	18342	2.20566e-10	4.84462e-08	9.65646	1.70987	0.0918231	ABHD6//ACVR1//ADGRG1//ADORA1//ANXA1//AP1AR//APC//APP//ARHGDIB//ARTN//ATP7A//ATP8A1//BCAR1//BMP4//BST2//C16orf45//CAMK1D//CAMSAP3//CARMIL1//CAVIN1//CCL2//CCL26//CD81//CDK5//CEACAM1//CEMIP//CGA//CHRM4//COL1A1//COL3A1//CREB3//CXCL14//CXCL8//CXCR4//CYR61//DAB2IP//DDX58//DEFB1//DLL4//DOCK10//DOCK4//DUSP10//ECM1//EDN1//EFNB2//EMP2//EREG//F2RL1//FADD//FAM89B//FBLN1//FES//FGF18//FGFBP1//FGFR1//FOXC2//FOX…
GO:0007167	enzyme_linked_receptor_protein_signaling_pathway	Biological Process	109	729	1492	18342	2.80081e-10	5.9596e-08	9.55272	1.83813	0.0730563	ACVR1//ADRB2//AP2S1//APC//ARID5B//ARRB2//ATP6V0A1//ATP6V0B//ATP6V0C//ATP6V0D1//ATP6V0E1//ATP6V1A//BCAR1//BDKRB2//BDNF//BMP4//BMP6//CBLB//CD7//CDH5//CGN//COL1A1//COL3A1//COL4A1//CSRNP1//DAB2IP//DNM1//EFNA2//EFNA3//EFNA4//EFNA5//EFNB1//EFNB2//EGR1//ELMO2//EPHB3//EPHB4//EREG//FAM83A//FES//FGF18//FGF19//FGFBP1//FGFR1//FGFR4//FOS//FOXC2//FOXO1//FOXO6//FURIN//FUT8//GAREM1//GCNT2//GDF11//HAP1//HBEGF//HP…
GO:0023052	signaling	Biological Process	566	5630	1492	18342	2.96431e-10	6.09422e-08	9.52808	1.23591	0.379357	ACSL1//ACVR1//ADAMTS1//ADGRB2//ADGRG1//ADGRL1//ADIPOR2//ADORA1//ADRA1B//ADRA2B//ADRB2//AKAP5//AKR1B1//AKR1C2//AKR1C3//ANXA1//ANXA6//AP2S1//APC//APP//ARHGAP31//ARHGAP40//ARHGAP5//ARHGDIB//ARHGEF12//ARHGEF25//ARID5B//ARL6//ARRB1//ARRB2//ARTN//ASB6//ASIC1//ATP1A1//ATP1A3//ATP1B1//ATP1B2//ATP6V0A1//ATP6V0B//ATP6V0C//ATP6V0D1//ATP6V0E1//ATP6V1A//AURKA//AXIN2//BAG3//BAK1//BCAP31//BCAR1//BCAR3//BCL10//B…
GO:0048513	animal_organ_development	Biological Process	337	3049	1492	18342	3.07441e-10	6.09422e-08	9.51224	1.35878	0.225871	ACVR1//ADAMTS1//ADAMTS5//ADGRG1//ADIPOR2//AKR1B1//AKR1C3//ALOX12B//ANG//ANXA1//APLP1//APP//AQP1//AQP3//ARG2//ARHGAP5//ARID5B//ARL6//ARNT2//ARRB1//ARRB2//ARTN//ATG5//ATP11C//ATP6V0D1//ATP7A//AURKA//AXIN2//BAG3//BAK1//BCAR3//BCL6//BHLHE41//BMP4//BMP6//BSG//C16orf45//C3orf58//CACNA1H//CALB1//CAV1//CCL2//CCNB1//CCNF//CD79B//CD9//CDH17//CDH5//CDK5//CDKN2B//CDON//CEBPA//CEBPB//CFL1//CIC//CKB//CNNM4//CN…
GO:0042981	regulation_of_apoptotic_process	Biological Process	200	1608	1492	18342	3.13259e-10	6.09422e-08	9.5041	1.52905	0.134048	ACVR1//ADORA1//AKR1B1//AKR1C3//ANGPTL4//ANKRD13C//ANXA1//APC//AQP1//ARG2//ARHGEF12//ARL6IP1//ARNT2//ARRB1//ARRB2//ATG5//AURKA//BAG3//BAK1//BCAP31//BCAR1//BCL10//BCL2L12//BCL6//BDKRB2//BDNF//BMF//BMP4//BMP6//BRMS1//BTG1//CAMK1D//CARD6//CAV1//CCL2//CCND2//CDK19//CDK5//CDKN2D//CEBPB//CFL1//CLU//CNTFR//CPEB4//CREB3//CREB3L1//CRLF1//CSF2//CYR61//DAB2IP//DDAH2//DEDD2//DEPTOR//DHCR24//DNAJA1//DUSP6//DYR…
GO:0043067	regulation_of_programmed_cell_death	Biological Process	200	1621	1492	18342	6.23005e-10	1.17835e-07	9.20551	1.51679	0.134048	ACVR1//ADORA1//AKR1B1//AKR1C3//ANGPTL4//ANKRD13C//ANXA1//APC//AQP1//ARG2//ARHGEF12//ARL6IP1//ARNT2//ARRB1//ARRB2//ATG5//AURKA//BAG3//BAK1//BCAP31//BCAR1//BCL10//BCL2L12//BCL6//BDKRB2//BDNF//BMF//BMP4//BMP6//BRMS1//BTG1//CAMK1D//CARD6//CAV1//CCL2//CCND2//CDK19//CDK5//CDKN2D//CEBPB//CFL1//CLU//CNTFR//CPEB4//CREB3//CREB3L1//CRLF1//CSF2//CYR61//DAB2IP//DDAH2//DEDD2//DEPTOR//DHCR24//DNAJA1//DUSP6//DYR…
GO:0019216	regulation_of_lipid_metabolic_process	Biological Process	66	368	1492	18342	7.49754e-10	1.37975e-07	9.12508	2.20482	0.0442359	AADAC//ABCG1//ABHD6//ACSL1//ADIPOR2//ADORA1//AKR1C3//ALAS1//ANGPTL4//ANXA1//ATP1A1//BMP6//CAV1//CD81//CEACAM1//CYP1A1//CYP51A1//CYR61//DAB2IP//DHCR7//EEF1A2//EGR1//FASN//FDFT1//FGF19//FGFR4//GAL//GLIPR1//HMGCR//ID2//IDH1//INSIG1//IRS2//LDLR//ME1//MTMR2//MVK//NFYA//NR4A3//PDK3//PDK4//PDP2//PIK3R3//PLPP1//POR//PPARG//PPARGC1A//PTGS2//RARRES2//RGL1//SC5D//SCD//SIRT4//SLC45A3//SMPD2//SNAI1//SNCA//SOC…
GO:0051128	regulation_of_cellular_component_organization	Biological Process	280	2462	1492	18342	9.05986e-10	1.62338e-07	9.04288	1.39813	0.187668	ADD3//ADGRB2//ADGRL1//ADIPOR2//ADRB2//ANAPC11//ANXA1//AP1AR//AP2S1//APC//APP//ARC//ARHGAP40//ARHGDIB//ARRB1//ARRB2//ATG5//ATP7A//ATP8A1//AURKA//AXIN2//BAG3//BAK1//BAMBI//BCAR1//BCL6//BDNF//BMF//BMP4//BST2//BTG1//C15orf38-AP3S2//C15orf62//C16orf45//C4BPA//CAMK1D//CAMSAP3//CARMIL1//CAV1//CCL2//CCL26//CCNB1//CCNB3//CCND2//CCND3//CCNF//CCNG2//CD14//CD63//CDC20//CDC42EP2//CDC42EP4//CDC42EP5//CDC42SE2/…
GO:0001775	cell_activation	Biological Process	139	1029	1492	18342	1.18364e-09	2.06651e-07	8.92678	1.66065	0.0931635	ACPP//ADRA2B//AGPAT2//ALDOC//ANXA1//APP//ARRB1//ARRB2//ATG5//ATP11C//ATP6V0A1//ATP6V0C//ATP7A//ATP8A1//BAK1//BCL6//BST2//CAP1//CCND3//CD14//CD58//CD63//CD7//CD79B//CD9//CDH17//CEACAM1//CLU//CMTM6//COL1A1//COL3A1//CRISPLD2//CSF2//CTSD//CXCL8//CYP26B1//CYSTM1//DGAT1//DGKZ//DLL4//DOCK10//DOCK11//DOK3//DYNLL1//EDN1//EGR1//ENTPD2//F2RL1//FABP5//FADD//FKBP1B//FZD7//GGH//GHDC//GLA//GLIPR1//GM2A//GMFG//G…
GO:2000147	positive_regulation_of_cell_motility	Biological Process	82	508	1492	18342	1.37174e-09	2.33504e-07	8.86273	1.98439	0.0549598	ACVR1//ANXA1//APC//APP//ATP7A//ATP8A1//BCAR1//BMP4//CAMK1D//CARMIL1//CAVIN1//CCL26//CEMIP//CGA//COL1A1//CREB3//CXCL14//CXCL8//CYR61//DAB2IP//DEFB1//DOCK4//EDN1//F2RL1//FADD//FAM89B//FGF18//FGFBP1//FGFR1//FOXC2//FOXF1//GATA2//GCNT2//GPSM3//HBEGF//HIF1A//HMOX1//HSPB1//IL1R1//ILK//IRS2//ITGA2//ITGA5//ITGAV//ITGB3//JUN//LGR6//MAP2K3//MMP14//MMP9//NR4A3//NRP2//NTN1//PGF//PLK2//PLPP3//PTGS2//RAC2//RARR…
GO:0051270	regulation_of_cellular_component_movement	Biological Process	135	996	1492	18342	1.67697e-09	2.785e-07	8.77547	1.6663	0.0904826	ABHD6//ACVR1//ADGRG1//ADORA1//ANXA1//AP1AR//APC//APP//ARHGDIB//ATP1A1//ATP7A//ATP8A1//BCAR1//BCL6//BMP4//BST2//C16orf45//CAMK1D//CAMSAP3//CARMIL1//CAV1//CAVIN1//CCL2//CCL26//CD81//CD9//CDK5//CEACAM1//CEMIP//CGA//CNIH2//COL1A1//COL3A1//CREB3//CXCL14//CXCL8//CYR61//DAB2IP//DDX58//DEFB1//DLL4//DOCK10//DOCK4//DUSP10//ECM1//EDN1//EMP2//EREG//F2RL1//FADD//FAM89B//FBLN1//FES//FGF18//FGFBP1//FGFR1//FOXC2…
GO:0071345	cellular_response_to_cytokine_stimulus	Biological Process	130	950	1492	18342	1.8809e-09	3.0493e-07	8.72563	1.68228	0.0871314	ABCC2//ACSL1//ADIPOR2//ANXA1//ARID5B//B3GNT2//BCL6//BST2//CAMK2G//CCL2//CCL26//CCRL2//CD58//CD70//CDC42EP2//CDC42EP4//CDK9//CEACAM1//CEBPA//CEBPB//CFL1//CHUK//CNTFR//COL1A1//CRKL//CRLF1//CSF2//CXCL8//CXCR4//DAB2IP//EDN1//EGR1//EPOR//EREG//ETV3//FASN//FOS//FOXF1//FOXO1//FSCN1//FZD4//GBP2//GFPT2//GPR17//GPR75//GSN//HIF1A//HLA-A//HLA-B//HMOX1//HSP90AA1//HYAL2//IFI30//IFIT1//IL13RA2//IL18R1//IL1R1//I…
GO:2000145	regulation_of_cell_motility	Biological Process	126	914	1492	18342	2.15161e-09	3.40704e-07	8.66724	1.69474	0.0844504	ABHD6//ACVR1//ADGRG1//ADORA1//ANXA1//AP1AR//APC//APP//ARHGDIB//ATP7A//ATP8A1//BCAR1//BMP4//BST2//C16orf45//CAMK1D//CAMSAP3//CARMIL1//CAVIN1//CCL2//CCL26//CD81//CDK5//CEACAM1//CEMIP//CGA//COL1A1//COL3A1//CREB3//CXCL14//CXCL8//CYR61//DAB2IP//DDX58//DEFB1//DLL4//DOCK10//DOCK4//DUSP10//ECM1//EDN1//EMP2//EREG//F2RL1//FADD//FAM89B//FBLN1//FES//FGF18//FGFBP1//FGFR1//FOXC2//FOXF1//GATA2//GCNT2//GPSM3//HB…
GO:0008284	positive_regulation_of_cell_proliferation	Biological Process	129	943	1492	18342	2.22616e-09	3.42126e-07	8.65244	1.68173	0.0864611	ADGRG1//AKR1B1//AKR1C2//AKR1C3//ANG//ANXA1//AQP1//ARNT2//ARRB1//ATP7A//BAMBI//BCL6//BMP4//BMP6//CCL26//CCNB1//CCNB3//CCND2//CCND3//CCNF//CCNG2//CCPG1//CD320//CD81//CDC20//CDON//CGA//CNTFR//CRKL//CRLF1//CSF2//CYR61//DLL4//ECM1//EDN1//EFNB1//EFNB2//EGFL7//EGR1//EGR3//EMP2//EREG//FADD//FGF18//FGF19//FGFBP1//FGFR1//FGFR4//FOXF1//FZD7//GAREM1//GATA2//GCNT2//GLP2R//GLUL//GRK5//HAVCR2//HBEGF//HIF1A//HLX…
GO:0051272	positive_regulation_of_cellular_component_movement	Biological Process	83	522	1492	18342	2.26108e-09	3.42126e-07	8.64568	1.95472	0.05563	ACVR1//ANXA1//APC//APP//ATP7A//ATP8A1//BCAR1//BCL6//BMP4//CAMK1D//CARMIL1//CAVIN1//CCL26//CEMIP//CGA//COL1A1//CREB3//CXCL14//CXCL8//CYR61//DAB2IP//DEFB1//DOCK4//EDN1//F2RL1//FADD//FAM89B//FGF18//FGFBP1//FGFR1//FOXC2//FOXF1//GATA2//GCNT2//GPSM3//HBEGF//HIF1A//HMOX1//HSPB1//IL1R1//ILK//IRS2//ITGA2//ITGA5//ITGAV//ITGB3//JUN//LGR6//MAP2K3//MMP14//MMP9//NR4A3//NRP2//NTN1//PGF//PLK2//PLPP3//PTGS2//RAC2…
GO:0007165	signal_transduction	Biological Process	526	5239	1492	18342	2.72225e-09	4.02953e-07	8.56507	1.23428	0.352547	ACSL1//ACVR1//ADAMTS1//ADGRB2//ADGRG1//ADGRL1//ADIPOR2//ADORA1//ADRA1B//ADRA2B//ADRB2//AKAP5//AKR1B1//AKR1C2//AKR1C3//ANXA1//ANXA6//AP2S1//APC//APP//ARHGAP31//ARHGAP40//ARHGAP5//ARHGDIB//ARHGEF12//ARHGEF25//ARID5B//ARL6//ARRB1//ARRB2//ARTN//ASB6//ASIC1//ATP1B1//ATP6V0A1//ATP6V0B//ATP6V0C//ATP6V0D1//ATP6V0E1//ATP6V1A//AURKA//AXIN2//BAG3//BAK1//BCAP31//BCAR1//BCAR3//BCL10//BCL6//BDKRB2//BDNF//BHLHE…
GO:0042325	regulation_of_phosphorylation	Biological Process	190	1551	1492	18342	3.17027e-09	4.42729e-07	8.4989	1.50598	0.127346	ACSL1//ACVR1//ADORA1//ADRA1B//ADRA2B//ADRB2//AFAP1L2//ALOX12B//ANG//APC//APP//ARRB1//ARRB2//ATP7A//AXIN2//BAK1//BCAR3//BCL10//BDKRB2//BDNF//BMP4//BMP6//C1QL4//CAMK2N2//CAV1//CBLB//CCL2//CCL26//CCNB1//CCNB3//CCND2//CCND3//CCNF//CCNG2//CD81//CDK2AP1//CDK5//CDK9//CDKN1C//CDKN2B//CDKN2D//CDON//CEACAM1//CEBPA//CEMIP//CHORDC1//CKS2//CLU//CRKL//CRLF1//CSF2//CXCR4//CYR61//DAB2IP//DEPTOR//DIRAS1//DNAJA1//…
GO:0007169	transmembrane_receptor_protein_tyrosine_kinase_signaling_pathway	Biological Process	82	517	1492	18342	3.18603e-09	4.42729e-07	8.49675	1.94985	0.0549598	ADRB2//AP2S1//APC//ARID5B//ATP6V0A1//ATP6V0B//ATP6V0C//ATP6V0D1//ATP6V0E1//ATP6V1A//BCAR1//BDKRB2//BDNF//CBLB//CD7//COL1A1//COL4A1//CSRNP1//DAB2IP//DNM1//EFNA2//EFNA3//EFNA4//EFNA5//EFNB1//EFNB2//ELMO2//EPHB3//EPHB4//EREG//FAM83A//FES//FGF18//FGF19//FGFBP1//FGFR1//FGFR4//FOXC2//FOXO1//FOXO6//GAREM1//HAP1//HBEGF//HSP90AA1//HSPB1//IGF2//IL31RA//IRS2//ITGAV//ITGB3//KLB//LCK//MAPKAPK2//MMP2//MMP9//NC…
GO:0060627	regulation_of_vesicle-mediated_transport	Biological Process	82	517	1492	18342	3.18603e-09	4.42729e-07	8.49675	1.94985	0.0549598	ANXA1//AP2S1//APP//ARRB1//ARRB2//ATG5//C2CD4C//C4BPA//CACNA1G//CACNA1H//CAMK1D//CAV1//CCL2//CD14//CD63//CDK5//CEACAM1//CLU//CNIH2//DNM1//EHD1//EHD4//F2RL1//FES//FOXF1//GAS1//GATA2//HAP1//HMOX1//IL13RA2//INSIG1//ITGA2//ITGAV//LDLR//LGI3//LRP1//MFGE8//MSN//MTMR2//NSF//PINK1//PPARG//PREB//PRKCG//PRTN3//PTX3//RAB17//RAB20//RAB26//RAB29//RAB3A//RAB3D//RAB5C//RABGAP1L//RAC2//RALA//RIMS3//RIMS4//RNF139/…
GO:0030335	positive_regulation_of_cell_migration	Biological Process	79	492	1492	18342	3.52294e-09	4.79423e-07	8.45309	1.97397	0.0529491	ACVR1//ANXA1//APC//APP//ATP7A//ATP8A1//BCAR1//BMP4//CAMK1D//CARMIL1//CCL26//CEMIP//CGA//COL1A1//CREB3//CXCL14//CXCL8//CYR61//DAB2IP//DOCK4//EDN1//F2RL1//FADD//FAM89B//FGF18//FGFBP1//FGFR1//FOXC2//FOXF1//GATA2//GCNT2//GPSM3//HBEGF//HIF1A//HMOX1//HSPB1//IL1R1//ILK//IRS2//ITGA2//ITGA5//ITGAV//ITGB3//JUN//LGR6//MAP2K3//MMP14//MMP9//NR4A3//NRP2//PGF//PLK2//PLPP3//PTGS2//RAC2//RARRES2//RHOB//RRAS2//S10…
GO:0010941	regulation_of_cell_death	Biological Process	209	1748	1492	18342	3.59092e-09	4.79423e-07	8.44479	1.46988	0.14008	ACVR1//ADORA1//AKR1B1//AKR1C3//ANGPTL4//ANKRD13C//ANXA1//APC//AQP1//ARG2//ARHGEF12//ARL6IP1//ARNT2//ARRB1//ARRB2//ATG5//AURKA//AXIN2//BAG3//BAK1//BCAP31//BCAR1//BCL10//BCL2L12//BCL6//BDKRB2//BDNF//BMF//BMP4//BMP6//BRMS1//BTG1//CAMK1D//CARD6//CAV1//CCL2//CCND2//CDK19//CDK5//CDKN2D//CEBPB//CFL1//CLU//CNTFR//CPEB4//CREB3//CREB3L1//CRLF1//CSF2//CYR61//DAB2IP//DDAH2//DEDD2//DEPTOR//DHCR24//DNAJA1//DUS…
GO:0051174	regulation_of_phosphorus_metabolic_process	Biological Process	215	1813	1492	18342	4.13957e-09	5.42045e-07	8.38304	1.45787	0.144102	ACSL1//ACVR1//ADORA1//ADRA1B//ADRA2B//ADRB2//AFAP1L2//AKAP5//ALOX12B//ANG//APC//APP//ARRB1//ARRB2//ATP7A//AXIN2//BAK1//BCAR3//BCL10//BDKRB2//BDNF//BMP4//BMP6//C1QL4//CAMK2N2//CAMSAP3//CAP1//CAV1//CBLB//CCL2//CCL26//CCNB1//CCNB3//CCND2//CCND3//CCNF//CCNG2//CD81//CDK2AP1//CDK5//CDK9//CDKN1C//CDKN2B//CDKN2D//CDON//CEACAM1//CEBPA//CEMIP//CHORDC1//CKS2//CLU//CRKL//CRLF1//CSF2//CXCR4//CYR61//DAB2IP//DE…
GO:0040017	positive_regulation_of_locomotion	Biological Process	84	539	1492	18342	4.76704e-09	6.1243e-07	8.32175	1.91588	0.0563003	ACVR1//ANXA1//APC//APP//ARTN//ATP7A//ATP8A1//BCAR1//BMP4//CAMK1D//CARMIL1//CAVIN1//CCL26//CEMIP//CGA//COL1A1//CREB3//CXCL14//CXCL8//CYR61//DAB2IP//DEFB1//DOCK4//EDN1//F2RL1//FADD//FAM89B//FGF18//FGFBP1//FGFR1//FOXC2//FOXF1//GATA2//GCNT2//GPSM3//HBEGF//HIF1A//HMOX1//HSPB1//IL1R1//ILK//IRS2//ITGA2//ITGA5//ITGAV//ITGB3//JUN//LGR6//MAP2K3//MMP14//MMP9//NR4A3//NRP2//NTN1//PC//PGF//PLK2//PLPP3//PTGS2//…
GO:0048608	reproductive_structure_development	Biological Process	69	411	1492	18342	5.49293e-09	6.92618e-07	8.2602	2.06388	0.0462466	ADAMTS1//ADGRG1//AKR1C3//ANG//ANXA1//ARID5B//ARRB1//ARRB2//BAK1//BMP4//BMP6//BSG//CCNF//CEBPA//CEBPB//COL9A3//CSF2//CTSV//CYR61//DHCR24//DLX3//EPOR//EREG//ETNK2//FOXF2//FZD4//GATA2//GJB3//HIF1A//HOXA11//HOXB13//HS6ST1//HTRA1//IDH1//IGF2//INHBB//KDM5B//KITLG//KRT19//KRT8//LFNG//MAMLD1//MMP14//NKX3-1//NOG//NSDHL//PHLDA2//PPARG//PRDM1//PRDX4//PTGS2//RBM15//RDH10//SERPINB5//SERPINE2//SNAI1//SOX15//SO…
GO:0045055	regulated_exocytosis	Biological Process	101	696	1492	18342	6.54048e-09	8.09711e-07	8.18439	1.78398	0.0676944	ACPP//AGPAT2//ALDOC//APP//ATP6V0A1//ATP6V0C//ATP8A1//BST2//C2CD4C//CAP1//CD14//CD58//CD63//CD9//CDK5//CEACAM1//CLU//CMTM6//CRISPLD2//CTSD//CYSTM1//DGAT1//DOK3//DYNLL1//ECM1//FABP5//GGH//GHDC//GLA//GLIPR1//GM2A//GMFG//GOLGA7//GSN//HSP90AA1//HSPA1A//HSPA1B//IDH1//IGF2//IQGAP2//ITGAV//ITGB3//LHFPL2//MAGED2//MCEMP1//METTL7A//MMP9//NEU1//NR4A3//OSTF1//PGAM1//PKM//PLA2G3//PLEKHO2//PRDX4//PRTN3//PSMA2//…
GO:0001501	skeletal_system_development	Biological Process	77	482	1492	18342	7.01557e-09	8.53018e-07	8.15394	1.96391	0.0516086	ADAMTS4//ARID5B//ATP7A//AXIN2//BMP4//BMP6//COL1A1//COL21A1//COL3A1//COL6A2//CSRNP1//CYP26B1//CYR61//DLX2//EBP//EDN1//EN1//FGF18//FGFR1//FOXC2//GDF11//HAPLN3//HIF1A//HOXA11//HOXB4//HOXC10//HOXC11//HOXC6//HOXD8//HYAL2//IGF2//IGFBP4//INSIG1//MATN3//MMP13//MMP14//MMP2//MMP9//MSX1//MSX2//NKX3-2//NOG//NPR3//P3H1//PAPSS1//PHOSPHO1//PIP4K2A//PRDX1//PTGER4//PTHLH//RANBP3L//RARB//RDH10//RFLNB//SH3PXD2B//SN…
GO:0061458	reproductive_system_development	Biological Process	69	414	1492	18342	7.46401e-09	8.76512e-07	8.12703	2.04893	0.0462466	ADAMTS1//ADGRG1//AKR1C3//ANG//ANXA1//ARID5B//ARRB1//ARRB2//BAK1//BMP4//BMP6//BSG//CCNF//CEBPA//CEBPB//COL9A3//CSF2//CTSV//CYR61//DHCR24//DLX3//EPOR//EREG//ETNK2//FOXF2//FZD4//GATA2//GJB3//HIF1A//HOXA11//HOXB13//HS6ST1//HTRA1//IDH1//IGF2//INHBB//KDM5B//KITLG//KRT19//KRT8//LFNG//MAMLD1//MMP14//NKX3-1//NOG//NSDHL//PHLDA2//PPARG//PRDM1//PRDX4//PTGS2//RBM15//RDH10//SERPINB5//SERPINE2//SNAI1//SOX15//SO…
GO:0045321	leukocyte_activation	Biological Process	121	885	1492	18342	7.46625e-09	8.76512e-07	8.1269	1.68082	0.0810992	ACPP//AGPAT2//ALDOC//ANXA1//ATG5//ATP11C//ATP6V0A1//ATP6V0C//ATP7A//ATP8A1//BAK1//BCL6//BST2//CAP1//CCND3//CD14//CD58//CD63//CD7//CD79B//CDH17//CEACAM1//CLU//CMTM6//CRISPLD2//CSF2//CTSD//CXCL8//CYP26B1//CYSTM1//DGAT1//DLL4//DOCK10//DOCK11//DOK3//DYNLL1//EDN1//EGR1//F2RL1//FABP5//FADD//FKBP1B//FZD7//GGH//GHDC//GLA//GLIPR1//GM2A//GMFG//GOLGA7//GSN//HAVCR2//HSP90AA1//HSPA1A//HSPA1B//HYAL2//ID2//IDH1…
GO:0001932	regulation_of_protein_phosphorylation	Biological Process	178	1448	1492	18342	8.27167e-09	9.54607e-07	8.08241	1.51123	0.119303	ACSL1//ACVR1//ADORA1//ADRA1B//ADRA2B//ADRB2//AFAP1L2//ALOX12B//ANG//APC//APP//ARRB1//ARRB2//AXIN2//BAK1//BCAR3//BDKRB2//BDNF//BMP4//BMP6//C1QL4//CAMK2N2//CAV1//CBLB//CCL2//CCL26//CCNB1//CCNB3//CCND2//CCND3//CCNF//CCNG2//CD81//CDK2AP1//CDK5//CDK9//CDKN1C//CDKN2B//CDKN2D//CDON//CEACAM1//CEBPA//CEMIP//CHORDC1//CKS2//CLU//CRKL//CRLF1//CSF2//CXCR4//CYR61//DAB2IP//DEPTOR//DIRAS1//DNAJA1//DUSP10//DUSP14…
GO:0009725	response_to_hormone	Biological Process	121	888	1492	18342	9.11122e-09	1.03397e-06	8.04042	1.67514	0.0810992	ABCC2//ABCG1//ACSL1//ADIPOR2//AKR1B1//AKR1C1//AKR1C2//AKR1C3//ANG//ANXA1//APC//AQP1//ARNT2//ATP1A1//ATP1A3//ATP6V0A1//ATP6V0B//ATP6V0C//ATP6V0D1//ATP6V0E1//ATP6V1A//BCAR1//BMP4//BMP6//BSG//BTG1//CACNA1H//CAV1//CEACAM1//CHRM4//COL1A1//CPEB2//CRY1//CTSL//CTSV//CYP11A1//DHCR24//DNAJA1//EDN1//EFNA5//EGR1//EREG//ERRFI1//FBXO32//FFAR4//FOS//FOSB//FOXC2//FOXO1//FOXO6//GAL//GGH//GLP2R//HOXB13//HPGD//IDH1…
GO:0030334	regulation_of_cell_migration	Biological Process	118	863	1492	18342	1.15378e-08	1.28788e-06	7.93788	1.68093	0.0790885	ABHD6//ACVR1//ADGRG1//ADORA1//ANXA1//APC//APP//ARHGDIB//ATP7A//ATP8A1//BCAR1//BMP4//BST2//C16orf45//CAMK1D//CAMSAP3//CARMIL1//CCL2//CCL26//CDK5//CEACAM1//CEMIP//CGA//COL1A1//COL3A1//CREB3//CXCL14//CXCL8//CYR61//DAB2IP//DDX58//DLL4//DOCK10//DOCK4//DUSP10//ECM1//EDN1//EMP2//F2RL1//FADD//FAM89B//FGF18//FGFBP1//FGFR1//FOXC2//FOXF1//GATA2//GCNT2//GPSM3//HBEGF//HIF1A//HMOX1//HSPB1//HYAL2//IL1R1//ILK//I…
GO:0006887	exocytosis	Biological Process	110	788	1492	18342	1.20357e-08	1.32179e-06	7.91953	1.71611	0.0737265	ACPP//AGPAT2//ALDOC//APP//ATP6V0A1//ATP6V0C//ATP8A1//BST2//C2CD4C//CAP1//CD14//CD58//CD63//CD9//CDK5//CEACAM1//CLU//CMTM6//CRISPLD2//CTSD//CYSTM1//DGAT1//DOK3//DYNLL1//ECM1//FABP5//GGH//GHDC//GLA//GLIPR1//GM2A//GMFG//GOLGA7//GSN//HAP1//HSP90AA1//HSPA1A//HSPA1B//IDH1//IGF2//IQGAP2//ITGAV//ITGB3//LGI3//LHFPL2//LIN7C//MAGED2//MCEMP1//METTL7A//MMP9//NEU1//NKD2//NR4A3//NSF//OSTF1//PGAM1//PKM//PLA2G3//…
GO:1902531	regulation_of_intracellular_signal_transduction	Biological Process	218	1874	1492	18342	1.60568e-08	1.73541e-06	7.79434	1.43009	0.146113	ABRACL//ADGRG1//ADORA1//ADRA1B//ADRA2B//ADRB2//AKAP5//AKR1B1//AKR1C2//AKR1C3//ALOX12B//APLP1//APP//ARHGAP31//ARHGAP40//ARHGAP5//ARHGDIB//ARHGEF12//ARHGEF25//ARNTL//ARRB1//ARRB2//AURKA//BCAP31//BCL10//BCL2L12//BCL6//BDKRB2//BMF//BMP4//BMP6//BST2//C1QL4//C3orf58//CARD19//CASTOR2//CAV1//CCL2//CCL26//CD14//CD81//CDK5//CDKN2D//CDON//CEACAM1//CHUK//CLU//COL3A1//CREB3//CREB3L1//CRKL//CRLF1//CSF2//CXCR4/…
GO:0030198	extracellular_matrix_organization	Biological Process	57	322	1492	18342	1.74546e-08	1.857e-06	7.75809	2.17619	0.0382038	ADAMTS4//ADAMTS5//APP//ATP7A//BSG//COL15A1//COL1A1//COL3A1//COL4A1//COL5A3//COL6A2//COL8A2//COL9A3//CREB3L1//CRISPLD2//CTSL//CTSV//CYR61//ELF3//ERO1B//FAM234B//FBLN1//FBLN2//FOXC2//FOXF1//FURIN//GSN//HTRA1//ITGA1//ITGA2//ITGA5//ITGA7//ITGAV//ITGB3//LOX//MATN3//MFAP2//MMP13//MMP14//MMP15//MMP2//MMP9//P4HA1//PLOD2//PRDX4//SERPINB5//SH3PXD2B//SOX9//SPARC//SPP1//SULF2//TGFB1//TGFB2//TIMP1//TLL1//TNF/…
GO:0033993	response_to_lipid	Biological Process	115	841	1492	18342	1.78121e-08	1.86589e-06	7.74928	1.68105	0.0770777	ABCC2//ABCG1//ACSL1//AKR1C2//AKR1C3//ANXA1//AQP1//AQP3//ARNT2//ATP1A1//ATP1A3//BMP4//BMP6//CAV1//CCL2//CCNB1//CD14//CDK19//CDKN2D//CEBPB//CHUK//COL1A1//CSF2//CTSV//CXCL8//CYP1A1//CYP24A1//CYP26B1//DAB2IP//DNAJA1//DUSP10//EDN1//EFNA5//ERRFI1//FBXO32//FGFR4//FOS//FOSB//FOXO1//FZD10//FZD4//FZD7//GATA2//GDAP1//GJB3//HAVCR2//HOXB13//HPGD//IDH1//INSIG1//ITGA2//JUN//LDLR//LOX//MAPKAPK2//MICB//MMP15//MSN…
GO:0043062	extracellular_structure_organization	Biological Process	62	365	1492	18342	2.08739e-08	2.15349e-06	7.6804	2.08822	0.041555	ABCG1//ADAMTS4//ADAMTS5//APP//ATP7A//BSG//COL15A1//COL1A1//COL3A1//COL4A1//COL5A3//COL6A2//COL8A2//COL9A3//CREB3L1//CRISPLD2//CTSL//CTSV//CYR61//DGAT1//ELF3//ERO1B//FAM234B//FBLN1//FBLN2//FOXC2//FOXF1//FURIN//GSN//HTRA1//ITGA1//ITGA2//ITGA5//ITGA7//ITGAV//ITGB3//LOX//LPL//MATN3//MFAP2//MMP13//MMP14//MMP15//MMP2//MMP9//P4HA1//PLOD2//PLTP//PRDX4//SERPINB5//SH3PXD2B//SOAT1//SOX9//SPARC//SPP1//SULF2/…
GO:0007399	nervous_system_development	Biological Process	256	2286	1492	18342	2.41954e-08	2.4589e-06	7.61627	1.37671	0.171582	ADAM22//ADGRB2//ADGRG1//ADORA1//ADRA2B//ANXA1//APLP1//APP//AQP1//ARC//ARL6//ARNT2//ARNTL//ARRB2//ARTN//ATP6V0D1//ATP7A//AURKA//B3GNT2//B4GAT1//BAG3//BAK1//BCL10//BCL6//BDNF//BHLHE41//BICDL1//BMP4//BMP6//BPNT1//BTD//C16orf45//CAMK1D//CAMK2G//CAMSAP3//CASZ1//CBX6//CCL2//CD9//CDC20//CDK5//CDKL5//CDON//CEBPB//CFL1//CIC//CKB//CLU//CNTFR//COL3A1//COL4A1//CRABP2//CRMP1//CTSV//CXCR4//DAB2IP//DBN1//DBNDD1…
GO:0043085	positive_regulation_of_catalytic_activity	Biological Process	176	1450	1492	18342	2.54902e-08	2.55239e-06	7.59363	1.49218	0.117962	ACSL1//ADORA1//ADRA2B//ADRB2//ADRM1//AFAP1L2//AGFG2//AKAP5//ANG//APP//ARHGAP31//ARHGAP40//ARHGAP5//ARHGDIB//ARHGEF12//ARRB1//ATP1B1//ATP1B2//ATP1B3//ATP7A//AXIN2//AZIN2//BAK1//BCAP31//BCL10//BDNF//BMP4//C15orf62//CAV1//CCL2//CCL26//CCNB1//CCND2//CCND3//CD81//CDC20//CDC42EP2//CDC42EP4//CDC42EP5//CDK5//CDKL5//CEMIP//CKS2//CLU//CRKL//CXCR4//CYR61//DAB2IP//DIRAS1//DNAJA1//DNAJB1//DNAJB11//DNAJB4//DOC…
GO:0040011	locomotion	Biological Process	158	1269	1492	18342	2.69423e-08	2.6587e-06	7.56956	1.53064	0.105898	ACVR1//ADGRG1//ANG//ANXA1//APC//APP//ARC//ARID5B//ARRB2//ARTN//ATP1B1//ATP1B2//ATP1B3//B3GNT2//B4GAT1//BAMBI//BCAR1//BDNF//BMP4//BSG//BTG1//C16orf45//CAP1//CARMIL1//CAV1//CCL2//CCL26//CCRL2//CD58//CD63//CDK5//CDKL5//CEACAM1//CFL1//CMTM6//COL1A1//CREB3//CRMP1//CUZD1//CXCL14//CXCL8//CXCR4//CYR61//DAB2IP//DEFB1//DGKZ//DIXDC1//DNAJA1//DNER//DOCK4//DPYSL2//EDN1//EFNA2//EFNA3//EFNA4//EFNA5//EFNB1//EFNB…
GO:0045859	regulation_of_protein_kinase_activity	Biological Process	114	845	1492	18342	4.32344e-08	4.20547e-06	7.36417	1.65854	0.0764075	ACSL1//ADORA1//ADRA2B//ADRB2//AFAP1L2//ANG//APC//APP//ARRB1//BDNF//BMP4//CAMK2N2//CAV1//CBLB//CCNB1//CCNB3//CCND2//CCND3//CCNF//CCNG2//CD81//CDK5//CDKN1C//CDKN2B//CDKN2D//CEACAM1//CEBPA//CEMIP//CHORDC1//CKS2//CLU//CRKL//CXCR4//CYR61//DAB2IP//DEPTOR//DIRAS1//DNAJA1//DUSP10//DUSP14//DUSP6//DUSP9//EDN1//EFNA5//EGR1//EMP2//EPHB3//EPHB4//EREG//ERRFI1//FAM212A//FGF18//FGFR1//FGFR4//FZD10//FZD4//GMFG//G…
GO:0043549	regulation_of_kinase_activity	Biological Process	120	904	1492	18342	4.69063e-08	4.49838e-06	7.32877	1.63189	0.080429	ACSL1//ADORA1//ADRA2B//ADRB2//AFAP1L2//ANG//APC//APP//ARRB1//BDNF//BMP4//CAMK2N2//CAV1//CBLB//CCNB1//CCNB3//CCND2//CCND3//CCNF//CCNG2//CD81//CDK5//CDKN1C//CDKN2B//CDKN2D//CEACAM1//CEBPA//CEMIP//CHORDC1//CKS2//CLU//CRKL//CXCR4//CYR61//DAB2IP//DEPTOR//DIRAS1//DNAJA1//DUSP10//DUSP14//DUSP6//DUSP9//EDN1//EEF1A2//EFNA5//EGR1//EMP2//EPHB3//EPHB4//EREG//ERRFI1//FAM212A//FGF18//FGFR1//FGFR4//FZD10//FZD4/…
GO:0022008	neurogenesis	Biological Process	185	1563	1492	18342	6.83239e-08	6.46135e-06	7.16543	1.45509	0.123995	ADAM22//ADGRG1//ADRA2B//ANXA1//APP//ARC//ARNTL//ARTN//ATP7A//AURKA//B3GNT2//B4GAT1//BCL6//BDNF//BHLHE41//BICDL1//BMP4//BMP6//C16orf45//CAMK1D//CAMSAP3//CASZ1//CBX6//CCL2//CD9//CDC20//CDK5//CDKL5//CDON//CEBPB//CFL1//CLU//COL3A1//CRABP2//CRMP1//CXCR4//DAB2IP//DBN1//DBNDD1//DIO3//DIXDC1//DLL4//DLX2//DNER//DOCK10//DPYSL2//DUSP10//EFHD1//EFNA2//EFNA3//EFNA4//EFNA5//EFNB1//EFNB2//EHD1//EN1//EN2//ENAH//…
GO:0046890	regulation_of_lipid_biosynthetic_process	Biological Process	36	169	1492	18342	6.98279e-08	6.51312e-06	7.15597	2.61875	0.0241287	ABCG1//ABHD6//ADIPOR2//AKR1C3//ANXA1//ATP1A1//BMP6//CEACAM1//CYP51A1//CYR61//DHCR7//EGR1//FASN//FDFT1//FGF19//FGFR4//HMGCR//IDH1//INSIG1//LDLR//MVK//NFYA//PDK4//POR//PPARGC1A//PTGS2//SC5D//SCD//SIRT4//SLC45A3//SMPD2//SNAI1//SORBS1//SQLE//TNF//VDR
GO:0043066	negative_regulation_of_apoptotic_process	Biological Process	122	931	1492	18342	7.4585e-08	6.86283e-06	7.12735	1.61097	0.0817694	ACVR1//ADORA1//AKR1B1//ANGPTL4//ANXA1//AQP1//ARG2//ARL6IP1//ARNT2//ARRB1//ARRB2//ATG5//AURKA//BAG3//BCL10//BCL2L12//BCL6//BDKRB2//BDNF//BMP4//CAMK1D//CAV1//CCL2//CCND2//CDKN2D//CEBPB//CFL1//CLU//CNTFR//CPEB4//CREB3//CREB3L1//CRLF1//CSF2//CYR61//DDAH2//DHCR24//DNAJA1//DYRK3//EDN1//EGR3//EN1//EN2//EPHB3//EPHB4//FADD//FFAR4//FGFR1//FGFR4//FOXC2//FOXO1//GATA2//GRK5//HIF1A//HMGCR//HMOX1//HSPA1A//HSPA1…
GO:0043069	negative_regulation_of_programmed_cell_death	Biological Process	123	944	1492	18342	9.05378e-08	8.21962e-06	7.04317	1.60181	0.0824397	ACVR1//ADORA1//AKR1B1//ANGPTL4//ANXA1//AQP1//ARG2//ARL6IP1//ARNT2//ARRB1//ARRB2//ATG5//AURKA//BAG3//BCL10//BCL2L12//BCL6//BDKRB2//BDNF//BMP4//CAMK1D//CAV1//CCL2//CCND2//CDKN2D//CEBPB//CFL1//CLU//CNTFR//CPEB4//CREB3//CREB3L1//CRLF1//CSF2//CYR61//DDAH2//DHCR24//DNAJA1//DYRK3//EDN1//EGR3//EN1//EN2//EPHB3//EPHB4//FADD//FFAR4//FGFR1//FGFR4//FOXC2//FOXO1//GATA2//GRK5//HIF1A//HMGCR//HMOX1//HSPA1A//HSPA1…
GO:0045597	positive_regulation_of_cell_differentiation	Biological Process	122	938	1492	18342	1.13069e-07	1.00695e-05	6.94666	1.59895	0.0817694	ACVR1//ADRA2B//ANXA1//APP//ARNTL//ARRB2//ATP11C//AURKA//AXIN2//BAMBI//BCL6//BDNF//BMP4//BMP6//BTG1//CAMK1D//CARMIL1//CD101//CD83//CDH5//CDKL5//CDON//CEACAM1//CEBPA//CEBPB//COL1A1//CRABP2//CRKL//CSF2//CXCR4//CYP26B1//CYR61//DAB2IP//DLX2//DUSP10//EDN1//EFNA5//EFNB2//EGR3//EHD1//FADD//FES//FGF18//FGFR1//FKBP1B//FOS//FOXO6//FZD4//GATA2//GCNT2//GPRC5B//HAP1//HIF1A//HLX//HOXA11//HOXB4//HSPA1A//HSPA1B//…
GO:0050810	regulation_of_steroid_biosynthetic_process	Biological Process	23	83	1492	18342	1.13872e-07	1.00695e-05	6.94358	3.40665	0.0154155	ABCG1//AKR1C3//ATP1A1//BMP6//CYP51A1//DHCR7//EGR1//FASN//FDFT1//FGF19//FGFR4//HMGCR//INSIG1//MVK//NFYA//POR//PPARGC1A//SC5D//SCD//SNAI1//SQLE//TNF//VDR
GO:0010942	positive_regulation_of_cell_death	Biological Process	95	681	1492	18342	1.27065e-07	1.09893e-05	6.89598	1.71496	0.0636729	ADORA1//AKR1C3//ANXA1//APC//ARHGEF12//ARRB1//ARRB2//AXIN2//BAK1//BCAP31//BCL10//BCL6//BMF//BMP4//BRMS1//BTG1//CAMK1D//CAV1//CCL2//CDK19//CDK5//CLU//CYR61//DAB2IP//DEDD2//DNAJA1//DUSP6//EEF1A2//EFNB2//EGLN3//EGR1//FADD//FOS//FOXO1//GAL//GRAMD4//GSN//HBA1//HMGCR//HMOX1//HPGD//HYAL2//INHBB//IP6K2//ITGA1//ITM2C//JUN//LCK//LDHA//LRP1//MAL//MAP2K6//MAP3K10//MAPT//MMP9//MSX1//MSX2//NEURL1//NGFR//NKX3-1/…
GO:0051247	positive_regulation_of_protein_metabolic_process	Biological Process	193	1660	1492	18342	1.27748e-07	1.09893e-05	6.89365	1.42931	0.129357	ACSL1//ACVR1//ADORA1//ADRA1B//ADRA2B//ADRB2//ADRM1//AFAP1L2//ALOX12B//ANG//APC//APP//ARNTL//ARRB1//ARRB2//AURKA//AXIN2//BAK1//BCAP31//BCAR3//BCL10//BCL6//BDNF//BMP4//BMP6//BRMS1//C4BPA//CAV1//CCL2//CCL26//CCNB1//CCND2//CCND3//CD81//CDC20//CDK2AP1//CDK5//CDK9//CDON//CEBPA//CEMIP//CKS2//CLU//CRKL//CRLF1//CSF2//CXCR4//CYR61//DAB2IP//DIRAS1//DUSP6//DUSP9//EDN1//EFNA3//EFNA5//EGLN3//EGR1//EHD4//EMP2//…
GO:0042176	regulation_of_protein_catabolic_process	Biological Process	60	366	1492	18342	1.29115e-07	1.09893e-05	6.88902	2.01534	0.0402145	APC//ARNTL//AURKA//AZIN2//BCAP31//C4BPA//CAV1//CD81//CEBPA//CLU//DAB2IP//EEF1A2//FAM83D//FOXO1//FURIN//HSP90AA1//HSPA1A//HSPA1B//LAMP3//LAPTM4B//LDLR//LRP1//MAD2L2//MAP1A//MSN//MYLIP//NKD2//NSF//OAZ1//OAZ2//PDCL3//PINK1//PLK1//PLK2//PRKCG//PSMC4//PSMD1//PSMD14//PSMD3//RNF139//RNF14//RNF144B//RYBP//SDCBP//SERPINE2//SNCA//SOCS5//SOX9//TIMP1//TIMP3//TIMP4//TNF//TNFRSF1B//TRIB1//TRIB2//UBB//VCP//WNT5…
GO:0051050	positive_regulation_of_transport	Biological Process	120	921	1492	18342	1.31256e-07	1.10336e-05	6.88188	1.60177	0.080429	ABCG1//ADIPOR2//ADORA1//ADRB2//ALOX12B//ANG//ANXA1//AQP1//ARC//ARL6IP1//ARRB1//ARRB2//ATG5//ATP1B1//ATP1B2//ATP1B3//ATP8A1//AZIN2//BAG3//BAK1//BCAP31//BMP6//CACNA1G//CACNA1H//CAMK1D//CAV1//CCL2//CD14//CD58//CD63//CDK5//CEMIP//CHUK//CLU//DDX58//DNM1//DYNLL1//EDN1//EHD1//F2RL1//FGF19//FGFR1//FHL1//FXYD1//G6PD//GAL//GATA2//GLRX//GLUL//HAP1//HAVCR2//HIF1A//HSPA1L//HYAL2//IL1RL1//INHBB//IRS2//ITGA2//I…
GO:0051179	localization	Biological Process	548	5639	1492	18342	1.48067e-07	1.2295e-05	6.82954	1.19469	0.367292	ABCC2//ABCC5//ABCF1//ABCG1//ACPP//ACSL1//ACVR1//ADD3//ADGRG1//ADORA1//ADRB2//AGPAT2//AKAP5//AKR1C1//AKR1C3//ALDOC//ANG//ANKRD13C//ANKRD50//ANO10//ANXA1//ANXA11//ANXA6//AP1AR//AP1S1//AP2S1//APC//APLP1//APOL2//APP//AQP1//AQP3//ARC//ARID5B//ARL4C//ARL4D//ARL6//ARL6IP1//ARNTL//ARRB1//ARRB2//ARTN//ASIC1//ATG4A//ATP11C//ATP1A1//ATP1A3//ATP1B1//ATP1B2//ATP1B3//ATP2A3//ATP6V0A1//ATP6V0B//ATP6V0C//ATP6V0D…
GO:1901652	response_to_peptide	Biological Process	81	555	1492	18342	1.66358e-07	1.36473e-05	6.77896	1.7942	0.0542895	ABCC2//ADRB2//AKR1B1//ANXA1//APC//APP//ATP1A3//ATP6V0A1//ATP6V0B//ATP6V0C//ATP6V0D1//ATP6V0E1//ATP6V1A//BCAR1//BSG//BTG1//CAV1//CD81//CD9//CDK5//CEACAM1//COL1A1//CPEB2//CRY1//CYP11A1//DNM1//EDN1//EGR1//EREG//ERRFI1//FBXO2//FBXO6//FFAR4//FOXC2//FOXO1//FOXO6//GAL//GGH//GLP2R//IGF2//INHBB//IRS2//KLF5//LDLR//LPIN1//LPL//LRP1//NFKBIA//NGFR//NR4A1//NR4A3//PDK4//PIK3R3//PKM//POR//PPARG//PRKAR2B//PSMC4//…
GO:0071363	cellular_response_to_growth_factor_stimulus	Biological Process	75	501	1492	18342	1.72115e-07	1.39516e-05	6.76418	1.84035	0.0502681	ACVR1//ANXA1//APP//ARRB2//ATP7A//BCAR1//BDNF//BMP4//BMP6//CAV1//CCL2//CDH5//CGN//COL1A1//COL3A1//CXCL8//DAB2IP//DLL4//EDN1//EGR1//EGR3//EHD1//EHD4//ERRFI1//FGF18//FGF19//FGFBP1//FGFR1//FGFR4//FOS//FURIN//FUT8//GAREM1//GAS1//GATA5//GCNT2//HAP1//HPGD//HSPB1//HYAL2//JUN//KAT2A//KDM5B//KLB//LRP4//MAP2K3//MAPKAPK2//MAPT//MSX1//MSX2//NGFR//NOG//NR4A1//NRP2//PDGFRL//PGF//PPARGC1A//PPP2R5B//SMAD6//SNCA//…
GO:0010243	response_to_organonitrogen_compound	Biological Process	117	897	1492	18342	1.79208e-07	1.43556e-05	6.74664	1.60351	0.0784182	ABCC2//ADRB2//AKR1B1//ANXA1//APC//APLP1//APP//AQP1//ASIC1//ATP1A3//ATP6V0A1//ATP6V0B//ATP6V0C//ATP6V0D1//ATP6V0E1//ATP6V1A//ATP7A//BCAR1//BSG//BTG1//CAV1//CD81//CD9//CDK5//CEACAM1//CEBPB//CFL1//CHUK//CIB2//COL1A1//COL3A1//COL4A1//CPEB2//CPEB4//CRY1//CYP11A1//DNM1//EDN1//EGR1//EREG//ERRFI1//FADD//FBXO2//FBXO6//FFAR4//FOS//FOSB//FOXC2//FOXO1//FOXO6//GAL//GGH//GLP2R//GSN//HCN2//IGF2//INHBB//IRS2//IT…
GO:0007264	small_GTPase_mediated_signal_transduction	Biological Process	54	319	1492	18342	1.89401e-07	1.49957e-05	6.72262	2.08104	0.036193	ADGRG1//ARHGAP31//ARHGAP5//ARHGDIB//ARHGEF12//BCAR3//BCL6//C15orf62//CDC42EP2//CDC42EP4//CDC42EP5//CFL1//CHUK//CRKL//DHCR24//DOCK10//DOCK11//DOCK4//DOK3//GPSM2//HMOX1//JUN//NGFR//NTN1//PAK4//PAK6//PLK2//RAB17//RAB20//RAB26//RAB29//RAB3A//RAB3D//RAB5C//RAB6B//RAC2//RALA//RANGRF//RAPGEF3//RAPGEFL1//RASGEF1A//RASGRP2//RGL1//RHOB//RHOC//RHOU//RHOV//RND1//RND2//RRAD//RRAGC//RRAS2//VAV3//WASF1
GO:0048878	chemical_homeostasis	Biological Process	134	1068	1492	18342	2.16146e-07	1.69165e-05	6.66525	1.54245	0.0898123	ABCC2//ABCG1//ABHD4//ADIPOR2//ADORA1//ADRA1B//AKR1B1//AKR1C1//ALOX12B//ANGPTL4//ANXA6//APP//AQP1//AQP3//ATP1A1//ATP1A3//ATP1B1//ATP1B2//ATP1B3//ATP2A3//ATP6V0A1//ATP6V0B//ATP6V0C//ATP6V0D1//ATP6V0E1//ATP6V1A//ATP7A//BAK1//BCAP31//BDKRB2//BMP6//CA12//CACNA1G//CALB1//CALB2//CAV1//CCRL2//CD52//CEBPA//CEMIP//CIB2//CKB//CNNM4//CRY1//CXCR4//CYP26B1//DGAT1//EDN1//EHD1//ERO1B//F2RL1//FABP5//FGFR4//FHL1//…
GO:0032270	positive_regulation_of_cellular_protein_metabolic_process	Biological Process	182	1559	1492	18342	2.31958e-07	1.79477e-05	6.63459	1.43517	0.121984	ACSL1//ACVR1//ADORA1//ADRA1B//ADRA2B//ADRB2//ADRM1//AFAP1L2//ALOX12B//ANG//APP//ARNTL//ARRB1//ARRB2//AURKA//AXIN2//BAK1//BCAP31//BCAR3//BCL10//BCL6//BDNF//BMP4//BMP6//BRMS1//CAV1//CCL2//CCL26//CCNB1//CCND2//CCND3//CD81//CDC20//CDK2AP1//CDK5//CDK9//CDON//CEBPA//CEMIP//CKS2//CLU//CRKL//CRLF1//CSF2//CXCR4//CYR61//DAB2IP//DIRAS1//DUSP6//DUSP9//EDN1//EFNA3//EFNA5//EGLN3//EGR1//EHD4//EMP2//EPHB3//EPHB4…
GO:0048699	generation_of_neurons	Biological Process	173	1466	1492	18342	2.35056e-07	1.79831e-05	6.62883	1.45074	0.115952	ADGRG1//ADRA2B//APP//ARC//ARNTL//ARTN//ATP7A//AURKA//B3GNT2//B4GAT1//BCL6//BDNF//BHLHE41//BICDL1//BMP4//BMP6//C16orf45//CAMK1D//CAMSAP3//CASZ1//CBX6//CDC20//CDK5//CDKL5//CDON//CEBPB//CFL1//COL3A1//CRABP2//CRMP1//CXCR4//DAB2IP//DBN1//DBNDD1//DIO3//DIXDC1//DLL4//DLX2//DNER//DOCK10//DPYSL2//DUSP10//EFHD1//EFNA2//EFNA3//EFNA4//EFNA5//EFNB1//EFNB2//EHD1//EN1//EN2//ENAH//EPHB3//EPOP//FES//FGFR1//FKBP1B…
GO:0032268	regulation_of_cellular_protein_metabolic_process	Biological Process	281	2628	1492	18342	3.28984e-07	2.48894e-05	6.48283	1.31449	0.188338	ACSL1//ACVR1//ADORA1//ADRA1B//ADRA2B//ADRB2//ADRM1//AFAP1L2//ALOX12B//ANG//APC//APP//AQP1//ARL6IP1//ARNTL//ARRB1//ARRB2//ATG5//AURKA//AXIN2//BAK1//BCAP31//BCAR3//BCL10//BCL2L12//BCL6//BDKRB2//BDNF//BMP4//BMP6//BRMS1//BST2//C1QL4//C4BPA//CAMK2N2//CAV1//CBLB//CCL2//CCL26//CCNB1//CCNB3//CCND2//CCND3//CCNF//CCNG2//CD81//CDC20//CDK2AP1//CDK5//CDK9//CDKN1C//CDKN2B//CDKN2D//CDON//CEACAM1//CEBPA//CEMIP//…
GO:0006950	response_to_stress	Biological Process	357	3473	1492	18342	3.37124e-07	2.5225e-05	6.47221	1.26369	0.239276	ABCC2//ABCF1//ACTR5//ACVR1//ADAMTS5//ADIPOR2//ADORA1//ADRA2B//ADRB2//AFAP1L2//AKR1B1//AKR1C3//ANG//ANGPTL4//ANXA1//APC//APOBEC3C//APOL2//APP//AQP1//AQP3//ARG2//ARNT2//ARNTL//ARRB1//ARRB2//ASIC1//ATG5//ATP1B1//ATP6V0D1//ATP7A//AURKA//BAG3//BAK1//BCL10//BCL6//BDKRB2//BMP6//BST2//BTG1//C4BPA//CAMK1D//CAMK2G//CARMIL1//CAV1//CCL2//CCL26//CCNB1//CCRL2//CD14//CD58//CD83//CD9//CDC42EP2//CDC42EP4//CDC42EP…
GO:0042327	positive_regulation_of_phosphorylation	Biological Process	130	1038	1492	18342	3.66907e-07	2.71551e-05	6.43544	1.53966	0.0871314	ACSL1//ACVR1//ADORA1//ADRA1B//ADRA2B//ADRB2//AFAP1L2//ALOX12B//ANG//APP//ARRB1//ARRB2//AXIN2//BCAR3//BCL10//BDNF//BMP4//BMP6//CAV1//CCL2//CCL26//CCNB1//CCND2//CCND3//CD81//CDK2AP1//CDK5//CDK9//CDON//CEMIP//CKS2//CLU//CRKL//CRLF1//CSF2//CXCR4//CYR61//DAB2IP//DIRAS1//DUSP6//DUSP9//EDN1//EEF1A2//EFNA5//EGR1//EHD4//EMP2//EPHB3//EPHB4//EREG//F2RL1//FFAR4//FGF18//FGF19//FGFR1//FGFR4//FZD10//FZD4//FZD7/…
GO:0051248	negative_regulation_of_protein_metabolic_process	Biological Process	140	1141	1492	18342	4.21101e-07	3.08309e-05	6.37561	1.50841	0.0938338	ANG//APC//APP//AQP1//ARL6IP1//ARRB1//ARRB2//ATG5//AZIN2//BAK1//BCL2L12//BDKRB2//BMP4//BST2//C1QL4//C4BPA//CAMK2N2//CAV1//CBLB//CCNB1//CDK5//CDKN1C//CDKN2B//CDKN2D//CEACAM1//CEBPA//CHORDC1//CLU//CPEB2//CPEB4//CRY1//CST1//CST4//DAB2IP//DEPTOR//DHCR24//DNAJA1//DUSP10//DUSP14//DUSP6//DUSP9//ECM1//EDN1//ERRFI1//F2RL1//FAM212A//FBLN1//FKBP1B//FOXO1//FURIN//FXYD1//G6PD//GAS1//GMFG//HAP1//HBEGF//HEXIM1//…
GO:0045596	negative_regulation_of_cell_differentiation	Biological Process	94	691	1492	18342	4.72426e-07	3.42207e-05	6.32567	1.67235	0.0630027	ABCG1//ADGRG1//ANXA1//AP1AR//APP//ARNTL//AXIN2//BCL6//BDNF//BHLHE41//BMP4//C16orf45//C1QL4//CAV1//CDK5//CEACAM1//COL3A1//CRMP1//CXCL14//DAB2IP//DIXDC1//DLX2//DUSP10//EFNA5//EFNB2//EREG//FBLN1//FOXO1//FZD7//G6PD//GAL//GATA2//GDF11//HLX//ID2//INSIG1//ISL2//ITGAV//ITGB3//ITM2C//LDLR//LRP1//LRP4//MAD2L2//MAFB//MSX1//MSX2//MYLIP//NFKBIA//NGFR//NKX3-2//NOCT//NOG//NOTCH3//NTN1//PIAS3//PLK2//PPARG//PRAME…
GO:0008283	cell_proliferation	Biological Process	93	684	1492	18342	5.56782e-07	3.99066e-05	6.25432	1.67149	0.0623324	ADRA1B//APC//ARTN//AXIN2//BAK1//BCAR1//BHLHE41//BMP4//BST2//C3orf58//CCND3//CD70//CD81//CDK5//CDK9//CEACAM1//CEBPB//CHRM4//CKS2//CLU//COL8A2//CUZD1//CYP1A1//CYR61//DBN1//DIXDC1//DLGAP5//EGR1//EHF//EMP2//EREG//F2RL1//FAM83A//FAM83D//FES//FGFR1//FKBP1B//FOXC2//FRAT2//FSCN1//FURIN//GLUL//HMOX1//HOXB4//ID2//IGFBP4//IGSF8//IL7R//ILK//INSIG1//IRS2//ITGA2//KAT2A//KITLG//KRT16//LIG4//LIPA//LRP1//MALT1//M…
GO:0071396	cellular_response_to_lipid	Biological Process	74	507	1492	18342	5.67392e-07	4.02435e-05	6.24612	1.79433	0.0495979	ABCC2//AKR1C2//AKR1C3//ANXA1//AQP1//ATP1A1//ATP1A3//BMP4//CCL2//CCNB1//CD14//CDK19//CEBPB//COL1A1//CSF2//CXCL8//CYP24A1//CYP26B1//DAB2IP//DNAJA1//EDN1//EFNA5//ERRFI1//FBXO32//FOXO1//FZD10//FZD4//FZD7//GDAP1//GJB3//HAVCR2//INSIG1//ITGA2//LDLR//MSN//MSX2//NCOA3//NFKBIA//NFKBIB//NKX3-1//NR2F1//NR4A1//NR4A3//NR6A1//PAQR5//PDK3//PDK4//PID1//PLPP1//PPARG//PPARGC1A//PTGER2//PTGER4//RARB//RBM14//RNF14//R…
GO:0043065	positive_regulation_of_apoptotic_process	Biological Process	86	620	1492	18342	6.44801e-07	4.52624e-05	6.19057	1.70524	0.0576408	AKR1C3//ANXA1//APC//ARHGEF12//ARRB1//ARRB2//BAK1//BCAP31//BCL10//BCL6//BMF//BMP4//BRMS1//BTG1//CAMK1D//CAV1//CCL2//CDK19//CDK5//CYR61//DAB2IP//DEDD2//DNAJA1//DUSP6//EEF1A2//EGLN3//FADD//FOXO1//GAL//GRAMD4//GSN//HMGCR//HMOX1//HPGD//HYAL2//INHBB//IP6K2//ITGA1//ITM2C//JUN//LCK//LDHA//MAL//MAP2K6//MAP3K10//MAPT//MMP9//MSX1//MSX2//NEURL1//NGFR//NKX3-1//NR4A3//NTSR1//OSGIN1//PINK1//PLEKHF1//PPARG//PPAR…
GO:0044281	small_molecule_metabolic_process	Biological Process	208	1859	1492	18342	6.87373e-07	4.77584e-05	6.16281	1.3755	0.13941	AARS2//ABCC2//ABCC5//ABCG1//ACOT7//ACPP//ACSL1//ACSS2//ADIPOR2//AFMID//AGPAT2//AHCYL2//AK1//AKR1B1//AKR1B10//AKR1C1//AKR1C2//AKR1C3//ALDOC//ALOX12B//AMD1//AMPD2//APOBEC3C//APOL2//APP//AQP1//ARG2//ATP1B1//ATP6V0A1//ATP6V1A//ATP7A//AZIN2//B3GLCT//B3GNT2//B3GNT7//B4GALT5//B4GAT1//BPNT1//BSG//BTD//CACNA1H//CARMIL1//CD320//CEBPA//CEMIP//CES1//CHPF//CHST2//CHST6//CHST7//CKB//COASY//COX6A1//CRABP2//CREM…
GO:0001890	placenta_development	Biological Process	31	147	1492	18342	7.00664e-07	4.81901e-05	6.15449	2.59252	0.0207775	ANG//BSG//CCNF//CEBPA//CEBPB//CSF2//CTSV//CYR61//DLX3//EPOR//ETNK2//GATA2//GJB3//HIF1A//HS6ST1//HTRA1//IGF2//KRT19//KRT8//NSDHL//PHLDA2//PPARG//PRDM1//PTGS2//RBM15//SNAI1//SPP1//STC1//TEX19//VDR//WNT7B
GO:0019221	cytokine-mediated_signaling_pathway	Biological Process	89	650	1492	18342	7.22988e-07	4.92282e-05	6.14087	1.68327	0.0596515	ACSL1//ADIPOR2//ANXA1//BCL6//BST2//CAMK2G//CCL2//CCL26//CCRL2//CD70//CEACAM1//CEBPA//CFL1//CHUK//CNTFR//CRKL//CRLF1//CSF2//CXCL8//CXCR4//EGR1//EPOR//EREG//FOS//FOXO1//FSCN1//GBP2//GPR17//GPR75//HIF1A//HLA-A//HLA-B//HMOX1//HSP90AA1//IFI30//IFIT1//IL13RA2//IL18R1//IL1R1//IL1R2//IL1RL1//IL22RA1//IL27RA//IL2RG//IL31RA//IL7R//ILK//IP6K2//IRS2//KRT18//KRT8//MAP3K8//MMP2//MMP9//MSN//MX1//NFKBIA//NGFR//O…
GO:0006629	lipid_metabolic_process	Biological Process	148	1234	1492	18342	7.48025e-07	4.99495e-05	6.12608	1.47443	0.0991957	ABCG1//ABHD4//ABHD6//ACOT7//ACSL1//ACSS2//ADIPOR2//ADORA1//AGPAT2//AKR1B1//AKR1B10//AKR1C1//AKR1C2//AKR1C3//ALOX12B//ANG//APOL2//APP//B4GALNT1//BPNT1//BTN2A1//CACNA1H//CAV1//CEBPA//CES1//CLU//CRABP2//CREM//CYP11A1//CYP1A1//CYP24A1//CYP26B1//CYP2S1//CYP3A5//CYP3A7//CYP51A1//DBI//DGAT1//DGKZ//DHCR24//DHCR7//DHRS9//EBP//EDN1//ELOVL3//EREG//ETNK2//ETNPPL//FABP5//FASN//FDFT1//FGF18//FGF19//FGFR1//FGFR…
GO:0070848	response_to_growth_factor	Biological Process	76	529	1492	18342	7.48252e-07	4.99495e-05	6.12595	1.76618	0.0509383	ACVR1//ANXA1//APP//ARRB2//ATP7A//BCAR1//BDNF//BMP4//BMP6//CAV1//CCL2//CDH5//CGN//COL1A1//COL3A1//CXCL8//DAB2IP//DLL4//DUSP6//EDN1//EGR1//EGR3//EHD1//EHD4//ERRFI1//FGF18//FGF19//FGFBP1//FGFR1//FGFR4//FOS//FURIN//FUT8//GAREM1//GAS1//GATA5//GCNT2//HAP1//HPGD//HSPB1//HYAL2//JUN//KAT2A//KDM5B//KLB//LRP4//MAP2K3//MAPKAPK2//MAPT//MSX1//MSX2//NGFR//NOG//NR4A1//NRP2//PDGFRL//PGF//PPARGC1A//PPP2R5B//SMAD6/…
GO:0007266	Rho_protein_signal_transduction	Biological Process	22	85	1492	18342	7.78048e-07	5.14343e-05	6.10899	3.18186	0.0147453	ADGRG1//ARHGAP5//ARHGDIB//ARHGEF12//BCL6//C15orf62//CDC42EP2//CDC42EP4//CDC42EP5//CFL1//CHUK//NGFR//NTN1//PAK4//PAK6//RAC2//RHOB//RHOC//RHOU//RHOV//RND1//RND2
GO:0009790	embryo_development	Biological Process	115	905	1492	18342	8.72105e-07	5.7056e-05	6.05943	1.56217	0.0770777	ACVR1//ARNT2//ATP7A//AXIN2//BCL10//BHLHE41//BMP4//CAMSAP3//CCNB1//CDON//CEBPA//CEBPB//CFL1//COL1A1//CRABP2//CSF2//CXCL8//CYP26B1//CYR61//DLL4//DLX2//EDN1//EFNB1//ELF3//EN1//EN2//ETNK2//EXT2//FAM212A//FGFR1//FOXC2//FOXF1//FUT8//GATA2//GJB3//GTPBP3//HES2//HIF1A//HLX//HMX2//HMX3//HOXA11//HOXB4//HOXC10//HOXC11//HOXC6//HOXD8//HS6ST1//HSBP1//ID2//IGF2//INSIG1//ITGA2//ITGA5//ITGA7//ITGAV//ITGB3//KAT2A//…
GO:0031325	positive_regulation_of_cellular_metabolic_process	Biological Process	339	3303	1492	18342	8.79848e-07	5.7056e-05	6.05559	1.26174	0.227212	AADAC//ACSL1//ACVR1//ADORA1//ADRA1B//ADRA2B//ADRB2//ADRM1//AFAP1L2//AKAP5//AKR1C3//ALOX12B//ANG//ANXA1//APC//APP//ARID3B//ARID5B//ARNT2//ARNTL//ARRB1//ARRB2//ATXN7L3//AURKA//AXIN2//BAK1//BAMBI//BCAP31//BCAR3//BCL10//BCL2L12//BCL6//BDNF//BMP4//BMP6//BRMS1//C4BPA//CASZ1//CAV1//CCL2//CCL26//CCNB1//CCND2//CCND3//CCPG1//CD63//CD81//CDC20//CDK2AP1//CDK5//CDK9//CDKN1C//CDKN2B//CDON//CEBPA//CEBPB//CEMIP/…
GO:0042592	homeostatic_process	Biological Process	181	1580	1492	18342	8.92265e-07	5.73154e-05	6.04951	1.40831	0.121314	ABCC2//ABCG1//ABHD4//ADIPOR2//ADORA1//ADRA1B//ADRB2//AKR1B1//AKR1C1//ALOX12B//AMPD2//ANG//ANGPTL4//ANXA1//ANXA6//APP//AQP1//AQP3//ATG5//ATP1A1//ATP1A3//ATP1B1//ATP1B2//ATP1B3//ATP2A3//ATP6V0A1//ATP6V0B//ATP6V0C//ATP6V0D1//ATP6V0E1//ATP6V1A//ATP7A//BAK1//BCAP31//BCL6//BDKRB2//BMP4//BMP6//CA12//CACNA1G//CALB1//CALB2//CAV1//CCL2//CCRL2//CD52//CEBPA//CEMIP//CIB2//CKB//CNNM4//CRY1//CST4//CXCR4//CYP26B…
GO:0043068	positive_regulation_of_programmed_cell_death	Biological Process	86	626	1492	18342	9.68558e-07	6.16347e-05	6.01387	1.68889	0.0576408	AKR1C3//ANXA1//APC//ARHGEF12//ARRB1//ARRB2//BAK1//BCAP31//BCL10//BCL6//BMF//BMP4//BRMS1//BTG1//CAMK1D//CAV1//CCL2//CDK19//CDK5//CYR61//DAB2IP//DEDD2//DNAJA1//DUSP6//EEF1A2//EGLN3//FADD//FOXO1//GAL//GRAMD4//GSN//HMGCR//HMOX1//HPGD//HYAL2//INHBB//IP6K2//ITGA1//ITM2C//JUN//LCK//LDHA//MAL//MAP2K6//MAP3K10//MAPT//MMP9//MSX1//MSX2//NEURL1//NGFR//NKX3-1//NR4A3//NTSR1//OSGIN1//PINK1//PLEKHF1//PPARG//PPAR…
GO:0009893	positive_regulation_of_metabolic_process	Biological Process	355	3490	1492	18342	1.07347e-06	6.76784e-05	5.96921	1.25049	0.237936	AADAC//ABCG1//ABHD6//ACSL1//ACVR1//ADORA1//ADRA1B//ADRA2B//ADRB2//ADRM1//AFAP1L2//AKAP5//AKR1C3//ALOX12B//ANG//ANXA1//APC//APP//ARID3B//ARID5B//ARNT2//ARNTL//ARRB1//ARRB2//ATP7A//ATXN7L3//AURKA//AXIN2//BAK1//BAMBI//BCAP31//BCAR3//BCL10//BCL2L12//BCL6//BDNF//BMP4//BMP6//BRMS1//C4BPA//CAMK1D//CASZ1//CAV1//CCL2//CCL26//CCNB1//CCND2//CCND3//CCPG1//CD63//CD81//CDC20//CDK2AP1//CDK5//CDK9//CDKN1C//CDKN2…
GO:0031401	positive_regulation_of_protein_modification_process	Biological Process	144	1201	1492	18342	1.08616e-06	6.78502e-05	5.96411	1.474	0.0965147	ACSL1//ACVR1//ADORA1//ADRA1B//ADRA2B//ADRB2//AFAP1L2//ALOX12B//ANG//APP//ARNTL//ARRB1//ARRB2//AXIN2//BCAR3//BCL10//BCL6//BDNF//BMP4//BMP6//BRMS1//CAV1//CCL2//CCL26//CCNB1//CCND2//CCND3//CD81//CDC20//CDK2AP1//CDK5//CDK9//CDON//CEMIP//CKS2//CLU//CRKL//CRLF1//CSF2//CXCR4//CYR61//DAB2IP//DIRAS1//DUSP6//DUSP9//EDN1//EFNA5//EGR1//EHD4//EMP2//EPHB3//EPHB4//EREG//F2RL1//FFAR4//FGF18//FGF19//FGFR1//FGFR4/…
GO:0040008	regulation_of_growth	Biological Process	91	676	1492	18342	1.13882e-06	7.0493e-05	5.94354	1.6549	0.060992	ADIPOR2//ADRB2//APP//BCAR1//BCL6//BDNF//BMP4//BST2//BTG1//CCNB1//CDK5//CDKL5//CDKN2D//CEACAM1//CRABP2//CYR61//DAB2IP//DIO3//DPYSL2//DUSP10//DUSP6//EDN1//EFNA5//FGFR1//FHL1//FOXC2//FXYD2//G6PD//GAL//GNG4//HBEGF//HIF1A//HLX//HOXB13//HSPA1A//HSPA1B//HTRA1//HYAL2//IGF2//IGFBP4//IGFBP6//ILK//IP6K2//KCTD21//MAD2L2//MAPT//MMP14//MRGBP//MSX1//MT1B//MT1F//MT1X//MTPN//NAIF1//NOG//NTN1//OLFM1//OSGIN1//PHLDA…
GO:0060429	epithelium_development	Biological Process	131	1071	1492	18342	1.20116e-06	7.3682e-05	5.9204	1.50369	0.0878016	ACVR1//AKR1C1//AKR1C2//AKR1C3//ALDOC//ANXA1//ARG2//ATP7A//AXIN2//BCL10//BHLHE41//BMP4//BMP6//CALB1//CAMSAP3//CEACAM1//CEBPB//CES1//CFL1//CNN3//COL4A1//CRLF1//CTSV//CYP1A1//CYP26B1//CYR61//DHRS9//DLL4//DLX3//EDN1//EHF//ELF3//EN1//EREG//ERRFI1//F2RL1//FAM212A//FGFR1//FOXC2//FOXF1//FOXQ1//FURIN//FZD7//GATA5//GDF11//GPR4//GSTM3//HBEGF//HES2//HIF1A//HOXA11//HOXB13//HOXB4//HOXC13//ID2//IL31RA//ILK//ITG…
GO:0009611	response_to_wounding	Biological Process	79	564	1492	18342	1.2552e-06	7.63096e-05	5.90129	1.72197	0.0529491	ADIPOR2//ADRA2B//ANXA1//ARRB1//ARRB2//AURKA//CARMIL1//CCNB1//CD9//CDK5//CEACAM1//COL1A1//COL3A1//CYP1A1//CYR61//DGKZ//DOCK11//EHD1//ENO3//ENTPD2//EREG//F12//F2RL1//FBLN1//FGFR1OP2//FOXF1//FZD7//GATA2//GATA5//GGCX//GP1BB//GPR4//GSN//HBEGF//HIF1A//HMOX1//HOXB13//HSPB1//ILK//INHBB//ITGA2//ITGA5//ITGB3//JUN//KDM1A//LCK//LGR6//LOX//MSX2//MTPN//NFE2//NINJ1//NOG//PKM//PRKAR2B//PRKCG//PROCR//PRTN3//RHOC/…
GO:0042326	negative_regulation_of_phosphorylation	Biological Process	69	473	1492	18342	1.39e-06	8.37565e-05	5.85699	1.79335	0.0462466	APC//ARRB1//ARRB2//BAK1//BDKRB2//BMP4//C1QL4//CAMK2N2//CAV1//CBLB//CCNB1//CDKN1C//CDKN2B//CDKN2D//CEACAM1//CEBPA//CHORDC1//DAB2IP//DEPTOR//DNAJA1//DUSP10//DUSP14//DUSP6//DUSP9//DYNLL1//ERRFI1//F2RL1//FAM212A//FBLN1//FOXO1//GMFG//HEXIM1//HMGCR//HSPB1//HSPH1//HYAL2//ILK//IRS2//JUN//MAPK8IP1//MAPT//NDRG2//NOG//PID1//PINK1//PLK1//PLPP3//PPARGC1A//PRKAR2B//RGS14//RGS2//RGS3//RTN4RL1//RTN4RL2//SLC9A3R1…
GO:0001934	positive_regulation_of_protein_phosphorylation	Biological Process	123	994	1492	18342	1.43587e-06	8.57616e-05	5.84289	1.52124	0.0824397	ACSL1//ACVR1//ADORA1//ADRA1B//ADRA2B//ADRB2//AFAP1L2//ALOX12B//ANG//APP//ARRB1//ARRB2//AXIN2//BCAR3//BDNF//BMP4//BMP6//CAV1//CCL2//CCL26//CCNB1//CCND2//CCND3//CD81//CDK2AP1//CDK5//CDK9//CDON//CEMIP//CKS2//CLU//CRKL//CRLF1//CSF2//CXCR4//CYR61//DAB2IP//DIRAS1//DUSP6//DUSP9//EDN1//EFNA5//EGR1//EHD4//EMP2//EPHB3//EPHB4//EREG//F2RL1//FFAR4//FGF18//FGF19//FGFR1//FGFR4//FZD10//FZD4//FZD7//GAREM1//GCNT2/…
GO:0051046	regulation_of_secretion	Biological Process	98	749	1492	18342	1.60223e-06	9.48661e-05	5.79527	1.6085	0.0656836	ADORA1//ADRA2B//ALOX12B//ANG//ANXA1//AQP1//ARG2//ARNTL//ARRB1//ASIC1//ATG5//BMP6//C2CD4C//CACNA1G//CACNA1H//CD14//CD58//CDK5//CEACAM1//CHUK//CRY1//DDX58//DYNLL1//EDN1//EFNA5//F2RL1//FES//FFAR4//FGFR1//FKBP1B//FOXF1//GAL//GATA2//GLUL//HAP1//HAVCR2//HIF1A//HMGCR//HMOX1//HYAL2//IL13RA2//IL1R2//IL1RL1//INHBB//IRS2//KCNMB4//KDM5B//LGI3//LPL//MAP2K6//NKX3-1//NLGN2//NSF//NTSR1//P3H1//PANX1//PINK1//PLA2R…
GO:0019218	regulation_of_steroid_metabolic_process	Biological Process	25	109	1492	18342	1.63857e-06	9.54667e-05	5.78553	2.81963	0.016756	ABCG1//AKR1C3//ATP1A1//BMP6//CYP51A1//DHCR7//EGR1//FASN//FDFT1//FGF19//FGFR4//GAL//HMGCR//INSIG1//LDLR//MVK//NFYA//POR//PPARGC1A//SC5D//SCD//SNAI1//SQLE//TNF//VDR
GO:0031324	negative_regulation_of_cellular_metabolic_process	Biological Process	279	2655	1492	18342	1.64042e-06	9.54667e-05	5.78505	1.29187	0.186997	AKR1C3//ANG//AP1AR//APC//APP//AQP1//ARID5B//ARL6IP1//ARNTL//ARRB1//ARRB2//ATG5//ATP1A1//AXIN2//AZIN2//BAG3//BAK1//BCL2L12//BCL6//BDKRB2//BHLHE41//BMF//BMP4//BMP6//BRMS1//BST2//C11orf95//C1QL4//C4BPA//CAMK2N2//CAMSAP3//CAV1//CBLB//CBX6//CCNB1//CCND3//CDK5//CDK9//CDKN1C//CDKN2B//CDKN2D//CEACAM1//CEBPA//CEBPB//CHORDC1//CIC//CLU//CPEB2//CPEB4//CREB3L1//CREM//CRY1//CSF2//CST1//CST4//DAB2IP//DEDD2//DEP…
GO:0006066	alcohol_metabolic_process	Biological Process	48	290	1492	18342	1.7311e-06	9.98365e-05	5.76168	2.0348	0.0321716	ABCG1//ACSS2//AKR1B1//AKR1B10//AKR1C1//AKR1C2//AKR1C3//APOL2//APP//CACNA1H//CEBPA//CES1//CYP11A1//CYP51A1//DGAT1//DHCR24//DHCR7//DHRS9//EBP//FDFT1//FGFR1//G6PD//GDE1//GDPD1//HMGCR//INSIG1//IP6K2//ISYNA1//LDLR//LIPE//MINPP1//MSMO1//MTMR2//MVK//NSDHL//NTSR1//PGP//PTS//RDH10//RDH11//SC5D//SDR16C5//SGPP2//SLC5A3//SOAT1//SPHK2//SPR//SQLE
GO:0060548	negative_regulation_of_cell_death	Biological Process	126	1028	1492	18342	1.74483e-06	9.98365e-05	5.75825	1.5068	0.0844504	ACVR1//ADORA1//AKR1B1//ANGPTL4//ANXA1//AQP1//ARG2//ARL6IP1//ARNT2//ARRB1//ARRB2//ATG5//AURKA//BAG3//BCL10//BCL2L12//BCL6//BDKRB2//BDNF//BMP4//CAMK1D//CAV1//CCL2//CCND2//CDK5//CDKN2D//CEBPB//CFL1//CLU//CNTFR//CPEB4//CREB3//CREB3L1//CRLF1//CSF2//CYR61//DDAH2//DHCR24//DNAJA1//DYRK3//EDN1//EGR3//EN1//EN2//EPHB3//EPHB4//FADD//FFAR4//FGFR1//FGFR4//FOXC2//FOXO1//GATA2//GRK5//HIF1A//HMGCR//HMOX1//HSPA1A/…
GO:0090287	regulation_of_cellular_response_to_growth_factor_stimulus	Biological Process	46	274	1492	18342	1.89772e-06	0.00010768	5.72177	2.06388	0.0308311	BAMBI//BMP4//CAV1//CD63//CDKN1C//CDKN2B//CREB3L1//CYR61//DAB2IP//DUSP6//FAM89B//FGF18//FGFBP1//FGFR1//FZD4//HIF1A//HSPA1A//HTRA1//ILK//ITGA5//ITGB3//LTBP1//MSX1//MSX2//NEO1//NOG//NPTN//PELO//PPP2R5B//SDCBP//SHISA2//SMAD6//SPRY4//SULF2//TGFB1//TGFBR3//TOB1//UBB//UBE2O//VASN//VEGFA//VEGFC//WASF1//WFIKKN1//WNT5A//ZNF703
GO:0023057	negative_regulation_of_signaling	Biological Process	159	1370	1492	18342	2.07074e-06	0.000115071	5.68387	1.42677	0.106568	ABHD6//ACVR1//ADORA1//ADRA2B//ADRB2//AP1AR//APC//APLP1//ARNTL//ARRB1//ARRB2//ASIC1//AXIN2//BAMBI//BCL2L12//BCL6//BDKRB2//BMP4//C1QL4//CARD19//CASTOR2//CAV1//CBLB//CD14//CDKN2D//CEACAM1//CLU//CREB3//CREB3L1//CRY1//CSF2//CXCL8//CYP26B1//DAB2IP//DEPTOR//DLL4//DLX2//DNAJA1//DNM1//DUSP10//DUSP14//DUSP6//DUSP9//DYRK3//ECM1//EDN1//EGFL7//EGR1//EPHB3//EPHB4//ERRFI1//F2RL1//FADD//FAM89B//FBLN1//FGFR1//FGF…
GO:0006464	cellular_protein_modification_process	Biological Process	324	3164	1492	18342	2.07869e-06	0.000115071	5.68221	1.25889	0.217158	ABHD17C//ACTR5//ACVR1//ADRB2//ADRM1//ALOX12B//AMN1//ANAPC11//ANXA1//APC//APP//ARID5B//ARRB1//ARRB2//ARTN//ASB6//ASPHD2//ATG4A//ATG5//ATP7A//ATXN7L3//AURKA//B3GLCT//B3GNT2//B3GNT7//B4GALT5//B4GAT1//BCL10//BMP4//BRMS1//BTG1//CAMK1D//CAMK2G//CBLB//CCDC126//CCL2//CCNB1//CCNB3//CCND2//CCND3//CCNF//CCNG2//CDC20//CDC42EP5//CDK19//CDK5//CDK9//CDKL5//CFL1//CHUK//COL3A1//CPE//CRKL//CRY1//CSF2//CXXC1//CYR61…
GO:0036211	protein_modification_process	Biological Process	324	3164	1492	18342	2.07869e-06	0.000115071	5.68221	1.25889	0.217158	ABHD17C//ACTR5//ACVR1//ADRB2//ADRM1//ALOX12B//AMN1//ANAPC11//ANXA1//APC//APP//ARID5B//ARRB1//ARRB2//ARTN//ASB6//ASPHD2//ATG4A//ATG5//ATP7A//ATXN7L3//AURKA//B3GLCT//B3GNT2//B3GNT7//B4GALT5//B4GAT1//BCL10//BMP4//BRMS1//BTG1//CAMK1D//CAMK2G//CBLB//CCDC126//CCL2//CCNB1//CCNB3//CCND2//CCND3//CCNF//CCNG2//CDC20//CDC42EP5//CDK19//CDK5//CDK9//CDKL5//CFL1//CHUK//COL3A1//CPE//CRKL//CRY1//CSF2//CXXC1//CYR61…
GO:1902533	positive_regulation_of_intracellular_signal_transduction	Biological Process	127	1046	1492	18342	2.57973e-06	0.000141656	5.58843	1.49262	0.0851206	ADGRG1//ADORA1//ADRA1B//ADRA2B//ADRB2//AKR1B1//AKR1C2//AKR1C3//ALOX12B//APP//ARRB1//ARRB2//BCAP31//BCL10//BMF//BMP4//BST2//CAV1//CCL2//CCL26//CD14//CD81//CDON//CHUK//COL3A1//CRKL//CRLF1//CSF2//CXCR4//DAB2IP//DIRAS1//DUSP6//DUSP9//ECM1//EDN1//EPHB3//EPHB4//EREG//F2RL1//FADD//FFAR4//FGF18//FGF19//FGFR1//FGFR4//FZD10//FZD4//FZD7//GAREM1//GCNT2//GPR17//GPR4//GPRC5B//HAP1//HAVCR2//HBEGF//HCST//HEXIM1/…
GO:0016192	vesicle-mediated_transport	Biological Process	210	1916	1492	18342	2.60577e-06	0.000141941	5.58406	1.34742	0.140751	ACPP//ADORA1//ADRB2//AGPAT2//ALDOC//ANKRD50//ANXA1//ANXA11//AP1AR//AP1S1//AP2S1//APLP1//APP//ARC//ARL4C//ARL4D//ARL6//ARRB1//ARRB2//ATP11C//ATP6V0A1//ATP6V0C//ATP8A1//BCAP31//BST2//C15orf38-AP3S2//C2CD4C//CAP1//CARMIL1//CAV1//CD14//CD58//CD63//CD81//CD9//CDC42SE2//CDK5//CEACAM1//CEP19//CES1//CLU//CMTM6//CNIH2//CRISPLD2//CTSD//CXCL8//CYSTM1//DGAT1//DNER//DNM1//DOK3//DPYSL2//DYNLL1//ECM1//EHD1//EHD…
GO:0051246	regulation_of_protein_metabolic_process	Biological Process	298	2882	1492	18342	2.69468e-06	0.000144504	5.56949	1.27116	0.199732	ABTB2//ACSL1//ACVR1//ADORA1//ADRA1B//ADRA2B//ADRB2//ADRM1//AFAP1L2//ALOX12B//ANG//APC//APP//AQP1//ARL6IP1//ARNTL//ARRB1//ARRB2//ATG5//AURKA//AXIN2//AZIN2//BAK1//BCAP31//BCAR3//BCL10//BCL2L12//BCL6//BDKRB2//BDNF//BMP4//BMP6//BRMS1//BST2//C1QL4//C4BPA//CAMK2N2//CAV1//CBLB//CCL2//CCL26//CCNB1//CCNB3//CCND2//CCND3//CCNF//CCNG2//CD81//CDC20//CDK2AP1//CDK5//CDK9//CDKN1C//CDKN2B//CDKN2D//CDON//CEACAM1//…
GO:0001933	negative_regulation_of_protein_phosphorylation	Biological Process	64	436	1492	18342	2.69525e-06	0.000144504	5.5694	1.80456	0.0428954	APC//ARRB1//ARRB2//BAK1//BDKRB2//BMP4//C1QL4//CAMK2N2//CAV1//CBLB//CCNB1//CDKN1C//CDKN2B//CDKN2D//CEACAM1//CEBPA//CHORDC1//DAB2IP//DEPTOR//DNAJA1//DUSP10//DUSP14//DUSP6//DUSP9//ERRFI1//F2RL1//FAM212A//FBLN1//FOXO1//GMFG//HEXIM1//HMGCR//HSPB1//HSPH1//HYAL2//ILK//JUN//MAPK8IP1//NDRG2//NOG//PID1//PINK1//PLK1//PLPP3//PPARGC1A//PRKAR2B//RGS14//RGS2//RGS3//RTN4RL1//RTN4RL2//SLC9A3R1//SMAD6//SNCA//SOCS1…
GO:0001558	regulation_of_cell_growth	Biological Process	61	409	1492	18342	2.72847e-06	0.000145142	5.56408	1.83351	0.0408847	ADIPOR2//BCAR1//BCL6//BDNF//BST2//BTG1//CDK5//CDKL5//CDKN2D//CEACAM1//CRABP2//CYR61//DPYSL2//EDN1//EFNA5//FHL1//FXYD2//G6PD//GAL//GNG4//HBEGF//HSPA1A//HSPA1B//HTRA1//HYAL2//IGFBP4//IGFBP6//ILK//IP6K2//MAD2L2//MAPT//MMP14//MSX1//MTPN//NAIF1//NTN1//OLFM1//OSGIN1//PPARG//PPP1R9B//PSRC1//PTPRS//RASGRP2//RND2//SDCBP//SEMA6B//SEMA6C//SEMA7A//SERPINE2//SGK1//SLC9A1//SPOCK1//SPP1//TGFB1//TGFB2//TMC8//TSP…
GO:0008285	negative_regulation_of_cell_proliferation	Biological Process	96	739	1492	18342	2.79964e-06	0.000147773	5.5529	1.597	0.0643432	ADAMTS1//ADGRG1//ADORA1//ANG//APC//APP//ARG2//AXIN2//BAK1//BCL6//BMP4//BTG1//C1QL4//CAV1//CCL2//CD9//CDH5//CDKN1C//CDKN2B//CDKN2D//CEACAM1//CEBPA//CEBPB//CTSV//CXCL8//DAB2IP//DDAH1//DHCR24//DLL4//DUSP10//EREG//ETV3//FBLN1//FBXO2//FGFBP1//GAL//GATA2//GDF11//HAVCR2//HMOX1//HSPA1A//HSPA1B//ID2//IGFBP6//ILK//ITGA1//JUN//MED31//MORC3//MSX1//MSX2//NDRG1//NDRG2//NEURL1//NGFR//NKX3-1//NOG//NPR3//P3H1//PE…
GO:0032870	cellular_response_to_hormone_stimulus	Biological Process	82	605	1492	18342	2.95882e-06	0.000154974	5.52888	1.66624	0.0549598	ABCC2//ACSL1//ADIPOR2//AKR1C1//AKR1C2//AKR1C3//ANXA1//APC//AQP1//ATP1A1//ATP1A3//ATP6V0A1//ATP6V0B//ATP6V0C//ATP6V0D1//ATP6V0E1//ATP6V1A//BCAR1//BMP4//CACNA1H//CAV1//CEACAM1//CHRM4//CPEB2//CTSL//CYP11A1//DNAJA1//EDN1//EFNA5//ERRFI1//FBXO32//FFAR4//FOS//FOSB//FOXC2//FOXO1//FOXO6//GLP2R//IGF2//INHBB//IRS2//ITGA2//JUN//LMO2//LPIN1//MSN//MSX2//NCOA3//NKX3-1//NR2F1//NR4A1//NR4A3//NR6A1//PAQR5//PDK4//P…
GO:0030879	mammary_gland_development	Biological Process	27	127	1492	18342	3.0492e-06	0.000158488	5.51581	2.61359	0.0180965	ARHGAP5//ATP7A//BMP4//CAV1//CEBPB//ELF3//FASN//FOXF1//HIF1A//ID2//IRS2//ITGA2//KDM5B//MSX1//MSX2//NEURL1//NTN1//SLC29A1//SOX9//TBX3//TGFB1//VDR//VEGFA//WNT5A//WNT7B//ZBTB7B//ZNF703
GO:0006695	cholesterol_biosynthetic_process	Biological Process	14	42	1492	18342	3.13538e-06	0.000161733	5.50371	4.09786	0.00938338	CES1//CYP51A1//DHCR24//DHCR7//EBP//FDFT1//G6PD//HMGCR//INSIG1//MSMO1//MVK//NSDHL//SC5D//SQLE
GO:0009987	cellular_process	Biological Process	1360	16064	1492	18342	3.3932e-06	0.000173717	5.46939	1.04079	0.911528	AADAC//AARS2//ABCC2//ABCC5//ABCF1//ABCG1//ABHD17C//ABHD4//ABHD6//ABTB2//ACOT7//ACPP//ACSL1//ACSS2//ACTR5//ACVR1//ADAM22//ADAMTS1//ADAMTS15//ADAMTS4//ADAMTS5//ADAT3//ADD3//ADGRB2//ADGRG1//ADGRL1//ADIPOR2//ADORA1//ADRA1B//ADRA2B//ADRB2//ADRM1//AFMID//AGPAT2//AHCYL2//AK1//AKAP5//AKR1B1//AKR1B10//AKR1C1//AKR1C2//AKR1C3//ALAS1//ALDOC//ALOX12B//ALPP//ALPPL2//AMD1//AMN1//AMPD2//ANAPC11//ANG//ANGPTL4//AN…
GO:0033043	regulation_of_organelle_organization	Biological Process	149	1279	1492	18342	3.61456e-06	0.000183668	5.44195	1.43217	0.099866	ADD3//ADRB2//ANAPC11//ANXA1//AP1AR//APC//ARHGAP40//ARHGDIB//ARRB1//ARRB2//ATG5//AURKA//AXIN2//BAG3//BAK1//BCL6//BMF//BMP4//BST2//C15orf38-AP3S2//C15orf62//C16orf45//CAMSAP3//CARMIL1//CCL26//CCNB1//CCNB3//CCND2//CCND3//CCNF//CCNG2//CDC20//CDC42EP2//CDC42EP4//CDC42EP5//CDK5//CDK9//CDKL5//CFL1//CHORDC1//CLU//CRIPT//CSF2//CTSV//DIXDC1//DLGAP5//EDN1//EFNA5//EREG//ESPL1//F2RL1//FES//FSCN1//FSD1//FZD10/…
GO:0014070	response_to_organic_cyclic_compound	Biological Process	110	882	1492	18342	3.6697e-06	0.000185089	5.43537	1.53321	0.0737265	ABCC2//ACSL1//AKR1C3//ANXA1//APLP1//APP//AQP1//AQP3//ARNT2//ATP1A1//ATP1A3//BAK1//BMP4//BMP6//BSG//CAV1//CCL2//CCNB1//CD83//CDK5//CDKN2D//CEBPA//CEBPB//CIB2//COL1A1//CTSV//CYP1A1//CYP24A1//DDX58//DNAJA1//DUSP6//EDN1//EFNA5//EGR1//EPHX1//ERRFI1//FADD//FBXO32//FGFR4//FKBP1B//FOS//FOSB//FOXF1//FOXO1//G6PD//GDAP1//GSN//HCN2//HID1//HOXB13//HPGD//IDH1//IFIT1//INSIG1//ITGA2//JUN//KAT2A//KDM1A//KLF5//LDH…
GO:0051493	regulation_of_cytoskeleton_organization	Biological Process	73	524	1492	18342	3.86257e-06	0.000193384	5.41312	1.71265	0.0489276	ADD3//AP1AR//APC//ARHGAP40//ARHGDIB//AURKA//BST2//C15orf38-AP3S2//C15orf62//C16orf45//CAMSAP3//CARMIL1//CCL26//CCNF//CDC42EP2//CDC42EP4//CDC42EP5//CDK5//CFL1//CHORDC1//CTSV//DIXDC1//EDN1//EFNA5//F2RL1//FES//FSCN1//FSD1//FZD10//GMFG//GPSM2//GSN//HSPA1A//HSPA1B//ILK//IQGAP2//KAT2A//LRP1//MAP1A//MAPRE2//MAPT//MTPN//NEK2//NES//PLK1//PLK2//PSRC1//PTGER4//RANBP3L//RANGRF//RAPGEF3//RBM14//RGS2//RHOB//RH…
GO:0010634	positive_regulation_of_epithelial_cell_migration	Biological Process	31	159	1492	18342	4.03664e-06	0.000200624	5.39398	2.39686	0.0207775	ANXA1//BCAR1//BMP4//EDN1//FGF18//FGFBP1//FGFR1//FOXC2//GATA2//HBEGF//HIF1A//HMOX1//HSPB1//ITGA2//ITGB3//JUN//MAP2K3//MMP9//NRP2//PLK2//PLPP3//PTGS2//RHOB//SOX9//SPARC//TGFB1//TGFB2//TMSB4X//VEGFA//VEGFC//WNT5A
GO:0002683	negative_regulation_of_immune_system_process	Biological Process	60	406	1492	18342	4.41999e-06	0.000218085	5.35458	1.81678	0.0402145	ADORA1//ANXA1//ARG2//ARRB2//BCL10//BCL6//BMP4//BST2//C4BPA//CCL2//CD14//CEACAM1//CEBPB//COL3A1//DAB2IP//DUSP10//F2RL1//FADD//FAM19A3//FOXF1//GAL//GATA2//GPR17//HAVCR2//HLX//HMOX1//HTRA1//ID2//IFIT1//IL13RA2//IL1RL1//IL27RA//IL31RA//IL7R//LDLR//MAFB//MICA//MICB//NFKBIA//PELI1//PIAS3//PPARG//PRDM1//PTGER4//PTPRS//RBM15//RNF26//SOCS1//SOCS5//SOX9//TGFB1//TGFB2//TLR4//TNF//TRAFD1//TRIB1//TSC22D3//TSC…
GO:0007265	Ras_protein_signal_transduction	Biological Process	42	249	1492	18342	4.63445e-06	0.000227021	5.334	2.07361	0.0281501	ADGRG1//ARHGAP5//ARHGDIB//ARHGEF12//BCL6//C15orf62//CDC42EP2//CDC42EP4//CDC42EP5//CFL1//CHUK//CRKL//DHCR24//DOK3//GPSM2//JUN//NGFR//NTN1//PAK4//PAK6//PLK2//RAB17//RAB20//RAB26//RAB29//RAB3A//RAB3D//RAB5C//RAB6B//RAC2//RALA//RANGRF//RAPGEF3//RASGRP2//RHOB//RHOC//RHOU//RHOV//RND1//RND2//RRAS2//WASF1
GO:0044255	cellular_lipid_metabolic_process	Biological Process	120	988	1492	18342	4.84646e-06	0.000235711	5.31458	1.49315	0.080429	ABHD4//ABHD6//ACOT7//ACSL1//ACSS2//ADIPOR2//AGPAT2//AKR1B10//AKR1C1//AKR1C2//AKR1C3//ALOX12B//ANG//B4GALNT1//BPNT1//CAV1//CES1//CRABP2//CREM//CYP1A1//CYP26B1//CYP2S1//CYP3A5//CYP3A7//DBI//DGAT1//DGKZ//DHRS9//EDN1//ELOVL3//EREG//ETNK2//ETNPPL//FABP5//FASN//FDFT1//FGF18//FGF19//FGFR1//FGFR4//FUT3//GDE1//GDPD1//GDPD3//GLA//GM2A//GSTM4//HBEGF//HMGCR//HPGD//INSIG1//IP6K2//IRS2//ISYNA1//KDELC1//KITLG//…
GO:0001655	urogenital_system_development	Biological Process	48	301	1492	18342	5.00905e-06	0.000241891	5.30024	1.96044	0.0321716	ADAMTS1//AKR1B1//ANXA1//ARG2//ARID5B//BMP4//BMP6//CALB1//COL4A1//CRLF1//EGR1//EPHB3//FGFR1//FOXC2//FOXF1//GATA2//GCNT3//GDF11//GPR4//HOXA11//HOXB13//HOXC11//HPGD//HYAL2//ID2//ILK//JMJD6//LRP4//MMP17//NKX3-1//NOG//NOTCH3//PGF//RARB//RDH10//SERPINB5//SMAD6//SOX4//SOX9//SULF2//TGFB1//TGFB2//VEGFA//WNT11//WNT5A//WNT6//WNT7B//ZNF354A
GO:0042060	wound_healing	Biological Process	67	472	1492	18342	5.08852e-06	0.000243998	5.29341	1.74506	0.0449062	ADIPOR2//ADRA2B//ANXA1//ARRB1//ARRB2//CARMIL1//CCNB1//CD9//CEACAM1//COL1A1//COL3A1//CYR61//DGKZ//DOCK11//EHD1//ENO3//ENTPD2//EREG//F12//F2RL1//FBLN1//FGFR1OP2//FZD7//GATA2//GATA5//GGCX//GP1BB//GPR4//GSN//HBEGF//HIF1A//HMOX1//HSPB1//ILK//ITGA2//ITGA5//ITGB3//KDM1A//LCK//LGR6//LOX//MSX2//MTPN//NFE2//NINJ1//NOG//PKM//PRKAR2B//PRKCG//PROCR//PRTN3//RHOC//SERPINA1//SERPINE2//SH2B2//SOX15//SPARC//STXBP1…
GO:0032269	negative_regulation_of_cellular_protein_metabolic_process	Biological Process	129	1081	1492	18342	5.18531e-06	0.0002469	5.28523	1.46704	0.0864611	ANG//APC//APP//AQP1//ARL6IP1//ARRB1//ARRB2//ATG5//BAK1//BCL2L12//BDKRB2//BMP4//BST2//C1QL4//C4BPA//CAMK2N2//CAV1//CBLB//CCNB1//CDK5//CDKN1C//CDKN2B//CDKN2D//CEACAM1//CEBPA//CHORDC1//CPEB2//CPEB4//CRY1//CST1//CST4//DAB2IP//DEPTOR//DHCR24//DNAJA1//DUSP10//DUSP14//DUSP6//DUSP9//ECM1//EDN1//ERRFI1//F2RL1//FAM212A//FBLN1//FKBP1B//FOXO1//FURIN//FXYD1//G6PD//GAS1//GMFG//HEXIM1//HMGCR//HSPA1A//HSPA1B//HS…
GO:1901698	response_to_nitrogen_compound	Biological Process	123	1020	1492	18342	5.22808e-06	0.000247208	5.28166	1.48246	0.0824397	ABCC2//ADRB2//AKR1B1//ANXA1//APC//APLP1//APP//AQP1//ASIC1//ATP1A3//ATP6V0A1//ATP6V0B//ATP6V0C//ATP6V0D1//ATP6V0E1//ATP6V1A//ATP7A//BCAR1//BSG//BTG1//CAV1//CD81//CD9//CDK5//CEACAM1//CEBPB//CFL1//CHRM4//CHUK//CIB2//COL1A1//COL3A1//COL4A1//CPEB2//CPEB4//CRY1//CYP11A1//DDX58//DNM1//EDN1//EGR1//EREG//ERRFI1//FADD//FBXO2//FBXO6//FFAR4//FOS//FOSB//FOXC2//FOXO1//FOXO6//GAL//GGH//GLP2R//GSN//GSTM3//HCN2//…
GO:0030100	regulation_of_endocytosis	Biological Process	41	243	1492	18342	5.94565e-06	0.0002792	5.2258	2.07422	0.0274799	AP2S1//APP//ARRB1//ARRB2//ATG5//C4BPA//CAMK1D//CAV1//CCL2//CD14//CD63//CLU//DNM1//EHD4//F2RL1//GATA2//ITGA2//ITGAV//LDLR//LRP1//MFGE8//MTMR2//PPARG//PRKCG//PRTN3//PTX3//RAB17//RAB20//RAB5C//SCAMP5//SDCBP//SH3GL3//SNCA//STON1//SYT7//TGFB1//TNF//TSPAN1//UNC119//VEGFA//WNT5A
GO:0009968	negative_regulation_of_signal_transduction	Biological Process	147	1270	1492	18342	5.99695e-06	0.00027968	5.22207	1.42296	0.0985255	ACVR1//ADRB2//APC//APLP1//ARNTL//ARRB1//ARRB2//AXIN2//BAMBI//BCL2L12//BCL6//BDKRB2//BMP4//C1QL4//CARD19//CASTOR2//CAV1//CBLB//CD14//CDKN2D//CEACAM1//CLU//CREB3//CREB3L1//CRY1//CSF2//CXCL8//CYP26B1//DAB2IP//DEPTOR//DLL4//DLX2//DNAJA1//DNM1//DUSP10//DUSP14//DUSP6//DUSP9//DYRK3//ECM1//EGFL7//EGR1//EPHB3//EPHB4//ERRFI1//F2RL1//FADD//FAM89B//FBLN1//FGFR1//FGFR4//FKBP1B//FOXO1//GATA2//HIF1A//HIST1H2BJ/…
GO:0050767	regulation_of_neurogenesis	Biological Process	96	753	1492	18342	6.22202e-06	0.000288202	5.20607	1.56731	0.0643432	ADGRG1//ADRA2B//APP//ARC//ARNTL//BCL6//BDNF//BHLHE41//BMP4//BMP6//C16orf45//CAMK1D//CASZ1//CDC20//CDK5//CDKL5//CDON//CFL1//COL3A1//CRABP2//CRMP1//CXCR4//DAB2IP//DBN1//DIXDC1//DLL4//DLX2//DPYSL2//DUSP10//EFNA3//EFNA5//EFNB2//EPHB3//FES//FGFR1//FKBP1B//FOXO6//FZD4//GATA2//GDF11//GPRC5B//HAP1//HES2//HIF1A//ID2//ILK//ISL2//ITM2C//KDM1A//LDLR//LIG4//LRP1//LRP4//MAPT//MYLIP//NEURL1//NGFR//NOG//NOTCH3//…
GO:0071417	cellular_response_to_organonitrogen_compound	Biological Process	70	503	1492	18342	6.31271e-06	0.000290427	5.19978	1.71083	0.0469169	ADRB2//AKR1B1//APC//APLP1//APP//AQP1//ATP1A3//ATP6V0A1//ATP6V0B//ATP6V0C//ATP6V0D1//ATP6V0E1//ATP6V1A//ATP7A//BCAR1//CAV1//CDK5//CEACAM1//CEBPB//CIB2//COL1A1//COL3A1//COL4A1//CPEB2//CPEB4//CYP11A1//EDN1//EGR1//ERRFI1//FOXC2//FOXO1//FOXO6//GLP2R//HCN2//IGF2//INHBB//IRS2//KDM1A//KLF5//LPIN1//LRP1//MMP2//NEURL1//NGFR//NR4A1//NR4A3//PDK4//PIK3R3//PKM//POR//PPARG//PPARGC1A//PPP1R9B//PRKAR2B//PTGS2//RA…
GO:0071900	regulation_of_protein_serine|threonine_kinase_activity	Biological Process	75	551	1492	18342	6.68845e-06	0.000305649	5.17467	1.67335	0.0502681	ACSL1//ADORA1//ADRA2B//ADRB2//APC//ARRB1//BMP4//CAV1//CCNB1//CCNB3//CCND2//CCND3//CCNF//CCNG2//CD81//CDKN1C//CDKN2B//CDKN2D//CEBPA//CEMIP//CHORDC1//CKS2//CRKL//CXCR4//DAB2IP//DIRAS1//DNAJA1//DUSP10//DUSP14//DUSP6//DUSP9//EDN1//EPHB3//EPHB4//FAM212A//FGF18//FGFR1//FGFR4//FZD10//FZD4//HEXIM1//HMGCR//HSPB1//HYAL2//IGF2//ILK//ITGA1//MADD//MAP2K3//MAP2K6//MAP3K10//MAP3K12//MAP3K8//MAPK8IP1//MAPKAPK2//…
GO:0003006	developmental_process_involved_in_reproduction	Biological Process	85	647	1492	18342	6.75034e-06	0.00030642	5.17067	1.61507	0.0569705	ACVR1//ADAMTS1//ADGRG1//AKR1C3//ANG//ANXA1//ARID5B//ARRB1//ARRB2//BAK1//BMP4//BMP6//BSG//CCNB1//CCNF//CEBPA//CEBPB//CNTFR//COL9A3//CSF2//CTSV//CYR61//DEFB1//DHCR24//DLX3//DYNLL1//EPOR//EREG//ETNK2//FOXF2//FZD4//GATA2//GJB3//HIF1A//HOXA11//HOXB13//HS6ST1//HTRA1//IDH1//IGF2//INHBB//IRF2BPL//KDM5B//KITLG//KRT19//KRT8//LFNG//LHFPL2//MAMLD1//MMP14//NECTIN2//NEURL1//NKX3-1//NOG//NSDHL//PAQR5//PHLDA2//P…
GO:0002376	immune_system_process	Biological Process	275	2659	1492	18342	7.20284e-06	0.000323237	5.1425	1.27143	0.184316	ACPP//AGPAT2//ALDOC//ANXA1//AP1S1//AP2S1//APOBEC3C//APP//ARG2//ARTN//ATG5//ATP11C//ATP1B1//ATP1B2//ATP1B3//ATP6V0A1//ATP6V0C//ATP7A//ATP8A1//BAK1//BCAP31//BCAR1//BCL10//BCL6//BMP4//BMP6//BSG//BST2//BTN2A1//C4BPA//CAMK2G//CAP1//CAV1//CCL2//CCL26//CCND3//CCRL2//CD14//CD320//CD58//CD63//CD7//CD70//CD79B//CD83//CDC42EP2//CDC42EP4//CDH17//CDKN2B//CEACAM1//CEBPA//CEBPB//CHUK//CLU//CMTM6//COL1A1//CRISPL…
GO:0043434	response_to_peptide_hormone	Biological Process	56	376	1492	18342	7.21575e-06	0.000323237	5.14172	1.83096	0.0375335	ABCC2//ANXA1//APC//ATP6V0A1//ATP6V0B//ATP6V0C//ATP6V0D1//ATP6V0E1//ATP6V1A//BCAR1//BSG//BTG1//CAV1//CEACAM1//COL1A1//CPEB2//CRY1//CYP11A1//EDN1//EGR1//EREG//ERRFI1//FOXC2//FOXO1//FOXO6//GAL//GGH//GLP2R//IGF2//INHBB//IRS2//LPIN1//NR4A1//NR4A3//PDK4//PIK3R3//PKM//POR//PPARG//PRKAR2B//PTGS2//SESN3//SH2B2//SLC9A1//SORBS1//SORT1//SPARC//STAT3//TBC1D4//TFF1//TGFB1//TGFBR3//TIMP1//TIMP4//VGF//ZBTB7B
GO:0050794	regulation_of_cellular_process	Biological Process	1011	11477	1492	18342	7.38175e-06	0.000328512	5.13184	1.08293	0.677614	AADAC//ABCG1//ABHD6//ABRACL//ABTB2//ACPP//ACSL1//ACTR5//ACVR1//ADAM22//ADAMTS1//ADD3//ADGRB2//ADGRG1//ADGRL1//ADIPOR2//ADORA1//ADRA1B//ADRA2B//ADRB2//ADRM1//AFAP1L2//AGPAT2//AKAP5//AKR1B1//AKR1C2//AKR1C3//ALOX12B//ANAPC11//ANG//ANGPTL4//ANKRD13C//ANXA1//ANXA6//AP1AR//AP2S1//APC//APLP1//APOBEC3C//APP//AQP1//AQP3//ARC//ARG2//ARHGAP31//ARHGAP40//ARHGAP5//ARHGDIB//ARHGEF12//ARHGEF25//ARID3B//ARID5B//…
GO:0048732	gland_development	Biological Process	59	404	1492	18342	7.69007e-06	0.000340011	5.11407	1.79535	0.0395442	ANXA1//ARHGAP5//ARID5B//ATP7A//AURKA//BMP4//CAV1//CEBPA//CEBPB//CRKL//CYP1A1//ELF3//EPHB3//FADD//FASN//FGFR1//FOXF1//GATA2//HIF1A//HLX//HMOX1//HOXB13//ID2//IGF2//IRS2//ITGA2//JUN//KDM5B//MAFB//MSN//MSX1//MSX2//NEURL1//NFKBIA//NKX3-1//NOG//NTN1//PKM//RARB//SERPINB5//SERPINE2//SLC29A1//SLC9A3R1//SOX9//SULF2//TBX3//TGFB1//TGFB2//TGFBR3//TGM2//THRA//TNF//VDR//VEGFA//WNT11//WNT5A//WNT7B//ZBTB7B//ZNF703
GO:0006796	phosphate-containing_compound_metabolic_process	Biological Process	233	2199	1492	18342	8.07677e-06	0.000354805	5.09276	1.30259	0.156166	ABHD4//ABHD6//ACOT7//ACPP//ACSL1//ACSS2//ACVR1//AGPAT2//AK1//ALDOC//ALPP//ALPPL2//AMPD2//APP//AQP1//ARTN//ATP1A1//ATP1B1//ATP6V0A1//ATP6V1A//AURKA//BMP4//BPNT1//CAMK1D//CAMK2G//CCL2//CCNB1//CCNB3//CCND2//CCND3//CCNF//CCNG2//CDC42EP5//CDK19//CDK5//CDK9//CDKL5//CFL1//CHUK//CKB//COASY//COX6A1//CRKL//CRY1//CSF2//DAB2IP//DBI//DCXR//DGAT1//DGKZ//DLGAP5//DUSP10//DUSP14//DUSP6//DUSP9//DYRK3//EFNA3//EFNA4…
GO:0022612	gland_morphogenesis	Biological Process	22	97	1492	18342	8.2264e-06	0.000359061	5.08479	2.78823	0.0147453	BMP4//CAV1//CEBPB//ELF3//FGFR1//HOXB13//KDM5B//MSN//MSX2//NKX3-1//NOG//NTN1//SERPINB5//SLC9A3R1//SOX9//TBX3//TGFB1//TGFB2//TGM2//TNF//VDR//WNT5A
GO:0010595	positive_regulation_of_endothelial_cell_migration	Biological Process	25	119	1492	18342	8.72486e-06	0.000378392	5.05924	2.58268	0.016756	ANXA1//BCAR1//BMP4//EDN1//FGF18//FGFBP1//FGFR1//FOXC2//GATA2//HIF1A//HMOX1//HSPB1//ITGB3//MAP2K3//NRP2//PLK2//PLPP3//PTGS2//RHOB//SPARC//TGFB1//TMSB4X//VEGFA//VEGFC//WNT5A
GO:0061035	regulation_of_cartilage_development	Biological Process	17	64	1492	18342	9.41836e-06	0.000405884	5.02602	3.26548	0.0113941	AXIN2//BMP4//BMP6//CYR61//FGF18//HOXA11//NKX3-2//NOG//POR//PTHLH//RARB//RFLNB//SOX9//TGFB1//TRPS1//WNT11//WNT5A
GO:0016477	cell_migration	Biological Process	114	942	1492	18342	9.94117e-06	0.000425719	5.00256	1.48776	0.0764075	ACVR1//ADGRG1//ANG//ANXA1//APC//ARC//ARID5B//ARRB2//ARTN//ATP1B1//ATP1B2//ATP1B3//BAMBI//BCAR1//BSG//BTG1//C16orf45//CAP1//CARMIL1//CAV1//CCL2//CCL26//CCRL2//CD58//CD63//CDK5//CDKL5//CEACAM1//CFL1//COL1A1//CUZD1//CXCL14//CXCL8//CXCR4//CYR61//DAB2IP//DGKZ//DIXDC1//DNER//DOCK4//EDN1//EFNB1//EFNB2//EGR3//ELMO2//EMP2//EPHB3//EPHB4//ESAM//F2RL1//FAM83D//FAT1//FES//FGF19//FGFR1//FGFR4//FSCN1//FUT8//GAT…
GO:0061448	connective_tissue_development	Biological Process	37	215	1492	18342	1.05255e-05	0.000445641	4.97776	2.11564	0.0247989	ARID5B//ATP7A//AXIN2//BMP4//BMP6//COL1A1//COL21A1//COL6A2//CYR61//DLX2//EDN1//EGR1//FGF18//FGFR1//FOXC2//GPR4//HIF1A//HOXA11//HYAL2//ID2//MATN3//MMP13//MSX1//MSX2//NOG//PPARGC1A//RARB//SH3PXD2B//SNAI1//SOX9//STC1//SULF2//TGFB1//THRA//TIMP1//WNT5A//WNT7B
GO:0006935	chemotaxis	Biological Process	71	520	1492	18342	1.05373e-05	0.000445641	4.97727	1.67854	0.0475871	ANXA1//APP//ARRB2//ARTN//B3GNT2//B4GAT1//BCAR1//BDNF//BMP4//CCL2//CCL26//CCRL2//CDK5//CMTM6//CREB3//CRMP1//CXCL14//CXCL8//CXCR4//CYR61//DEFB1//DOCK4//DPYSL2//EDN1//EFNA2//EFNA3//EFNA4//EFNA5//EFNB1//EFNB2//EGR3//ELMO2//ENAH//EPHB3//FES//HBEGF//IRS2//ISL2//ITGA1//ITGAV//ITGB3//KIF3A//LHX2//LYST//NECTIN1//NEO1//NGFR//NOG//NR4A1//NR4A3//NRP2//NTN1//PGF//RAC2//RALA//RARRES2//S1PR1//SCN1B//SEMA6B//SEM…
GO:0045926	negative_regulation_of_growth	Biological Process	41	249	1492	18342	1.09504e-05	0.000460253	4.96057	2.02424	0.0274799	ADIPOR2//ADRB2//BCL6//BMP4//BST2//BTG1//CDK5//CDKN2D//DUSP10//FHL1//G6PD//GAL//GNG4//HIF1A//HSPA1A//HSPA1B//HYAL2//IP6K2//MSX1//MT1B//MT1F//MT1X//NAIF1//NOG//NTN1//OSGIN1//PPARG//PPP1R9B//PSRC1//PTPRS//SEMA6B//SEMA6C//SEMA7A//SERPINE2//SPP1//TGFB1//TGFB2//TNF//TSPYL2//WNT11//WNT5A
GO:0050801	ion_homeostasis	Biological Process	96	764	1492	18342	1.13445e-05	0.000473893	4.94522	1.54474	0.0643432	ABCC2//ABCG1//ADORA1//ADRA1B//ANXA6//APP//ATP1A1//ATP1A3//ATP1B1//ATP1B2//ATP1B3//ATP2A3//ATP6V0A1//ATP6V0B//ATP6V0C//ATP6V0D1//ATP6V0E1//ATP6V1A//ATP7A//BAK1//BCAP31//BDKRB2//BMP6//CA12//CACNA1G//CALB1//CALB2//CAV1//CCRL2//CD52//CEMIP//CIB2//CKB//CNNM4//CXCR4//DGAT1//EDN1//F2RL1//FGFR4//FHL1//FKBP1B//GATA2//GPR17//GPR4//HAP1//HIF1A//HMOX1//HYAL2//ITGAV//JPH3//KCNH2//KCNK3//KCTD17//LCK//MCOLN1//M…
GO:0030308	negative_regulation_of_cell_growth	Biological Process	32	175	1492	18342	1.15113e-05	0.000477929	4.93888	2.24797	0.0214477	ADIPOR2//BCL6//BST2//BTG1//CDK5//CDKN2D//FHL1//G6PD//GAL//GNG4//HSPA1A//HSPA1B//HYAL2//IP6K2//MSX1//NAIF1//NTN1//OSGIN1//PPARG//PPP1R9B//PSRC1//PTPRS//SEMA6B//SEMA6C//SEMA7A//SERPINE2//SPP1//TGFB1//TGFB2//TSPYL2//WNT11//WNT5A
GO:0048729	tissue_morphogenesis	Biological Process	74	550	1492	18342	1.16003e-05	0.000478704	4.93553	1.65404	0.0495979	ACVR1//ARTN//ATP7A//BCL10//BMP4//CAMSAP3//CEACAM1//CFL1//COL21A1//COL3A1//COL4A1//COL6A2//CTSV//CYR61//DLL4//EDN1//EXT2//FGFR1//FOXC2//FOXF1//FOXL1//FOXQ1//GCNT3//HBEGF//HIF1A//HOXA11//HOXB13//HOXB4//ILK//ITGA2//ITGA5//ITGB3//KAT2A//KDM5B//KRT16//LHX2//LIN7C//LUZP1//MATN3//MMP14//MSN//MSX1//MSX2//NKX3-1//NOG//NR4A3//NTN1//PGF//RALA//RBM15//RDH10//RHOB//RHOC//S1PR1//SERPINB5//SLC9A3R1//SNAI1//SOX4…
GO:0007417	central_nervous_system_development	Biological Process	111	915	1492	18342	1.17153e-05	0.00048054	4.93125	1.49135	0.0743968	ADAM22//ADGRG1//APP//AQP1//ARL6//ARNT2//ARRB2//ATP6V0D1//ATP7A//BAG3//BAK1//BMP4//BTD//C16orf45//CD9//CDK5//CDON//CIC//CKB//CLU//COL3A1//COL4A1//CXCR4//DAB2IP//DIXDC1//DLL4//DLX2//DNAJB1//DNER//DPYSL2//DUSP10//DYNLL1//EFNA2//EN1//EN2//EPHB3//EPOR//FGFR1//FGFR4//FZD4//G6PD//GATA2//GDF11//GSN//HAP1//HAPLN3//HIF1A//HMX2//HMX3//HOXC10//HPCAL4//HSP90AA1//ID2//INA//IRS2//ISL2//KAT2A//KCNK3//KDM1A//LHX2…
GO:0045598	regulation_of_fat_cell_differentiation	Biological Process	25	121	1492	18342	1.18556e-05	0.000483383	4.92608	2.53999	0.016756	ARNTL//C1QL4//CEBPA//CEBPB//DUSP10//FOXO1//GATA2//ID2//INSIG1//KLF5//MSX2//NOCT//PPARG//PTGS2//RARRES2//SH3PXD2B//SORT1//TAF8//TGFB1//TNF//TRIB2//WNT5A//ZBTB7B//ZFP36L2//ZNF385A
GO:0035924	cellular_response_to_vascular_endothelial_growth_factor_stimulus	Biological Process	13	41	1492	18342	1.31078e-05	0.000531258	4.88247	3.89796	0.00871314	ANXA1//DAB2IP//DLL4//EGR3//GAS1//HSPB1//MAP2K3//MAPKAPK2//NR4A1//NRP2//PGF//VEGFA//VEGFC
GO:0002263	cell_activation_involved_in_immune_response	Biological Process	80	610	1492	18342	1.33767e-05	0.000538945	4.87365	1.61227	0.0536193	ACPP//AGPAT2//ALDOC//APP//ATP6V0A1//ATP6V0C//ATP7A//ATP8A1//BST2//CAP1//CD14//CD58//CD63//CDH17//CEACAM1//CMTM6//CRISPLD2//CTSD//CYSTM1//DGAT1//DOCK10//DOCK11//DOK3//DYNLL1//F2RL1//FABP5//GGH//GHDC//GLA//GLIPR1//GM2A//GMFG//GOLGA7//GSN//HAVCR2//HSP90AA1//HSPA1A//HSPA1B//IDH1//IL18R1//IQGAP2//ITGAV//LFNG//LIG4//LRP1//MCEMP1//METTL7A//MMP9//NEU1//NR4A3//OSTF1//PGAM1//PKM//PLA2G3//PLEKHO2//PRDX4//PR…
GO:1901214	regulation_of_neuron_death	Biological Process	45	286	1492	18342	1.3888e-05	0.000556255	4.85736	1.9343	0.0301609	ADORA1//ARRB1//ARRB2//BDNF//CCL2//CDK5//CEBPB//CLU//CNTFR//CPEB4//CRLF1//DHCR24//EFNB2//EGLN3//EGR1//EN1//EN2//FOS//G6PD//GPR75//HIF1A//HMOX1//ILK//ITGA1//JUN//LIG4//LRP1//MAP3K12//MAPT//NR4A3//PINK1//PPARGC1A//PRKCG//RAB29//RETREG1//RRAS2//SNCA//STAT3//STXBP1//TGFB2//TIGAR//TLR4//UBB//UNC5B//WNT5A
GO:0051051	negative_regulation_of_transport	Biological Process	65	468	1492	18342	1.42982e-05	0.000569338	4.84472	1.70744	0.0435657	ADORA1//ADRA2B//ANXA1//APP//ARG2//ASIC1//ATG5//ATP7A//BAG3//BST2//CAV1//CDK5//CEACAM1//CNIH2//CRY1//EDN1//F2RL1//FABP5//FFAR4//FKBP1B//FOXF1//GEM//HMGCR//HMOX1//HSPA1A//IL13RA2//IL1R2//INHBB//INSIG1//IRS2//ITGAV//ITGB3//KCNH2//MMP9//MTMR2//NDFIP2//NTSR1//OAZ1//OAZ2//PID1//PLA2R1//PRTN3//PTGER4//PTGS2//RRAD//SCAMP5//SDCBP//SERPINE2//SH3GL3//SIRT4//SLC30A1//SLC9A3R1//SNCA//SRCIN1//SRGN//STC1//SYTL4…
GO:0072001	renal_system_development	Biological Process	43	269	1492	18342	1.43941e-05	0.000569824	4.84181	1.96514	0.0288204	ADAMTS1//AKR1B1//ARG2//ARID5B//BMP4//BMP6//CALB1//COL4A1//CRLF1//EGR1//FGFR1//FOXC2//FOXF1//GCNT3//GDF11//GPR4//HOXA11//HOXC11//HPGD//HYAL2//ID2//ILK//JMJD6//LRP4//MMP17//NKX3-1//NOG//NOTCH3//PGF//RARB//RDH10//SMAD6//SOX4//SOX9//SULF2//TGFB1//TGFB2//VEGFA//WNT11//WNT5A//WNT6//WNT7B//ZNF354A
GO:0008361	regulation_of_cell_size	Biological Process	32	177	1492	18342	1.46432e-05	0.000573722	4.83436	2.22257	0.0214477	AQP1//ATP7A//BDNF//CDK5//CDKL5//CRABP2//DEPTOR//DPYSL2//EDN1//EFNA5//IL7R//ILK//KDM1A//MAPT//MSN//MTPN//NTN1//OLFM1//PTPRS//RND2//SEMA6B//SEMA6C//SEMA7A//SHANK3//SLC12A2//SLC12A6//SLC12A8//SLC9A3R1//SPP1//VAV3//VEGFA//WNT5A
GO:0048468	cell_development	Biological Process	176	1599	1492	18342	1.46611e-05	0.000573722	4.83383	1.35314	0.117962	ACVR1//ADAM22//ANG//APP//ARC//ARID5B//ARTN//ATG5//ATP7A//AURKA//B3GNT2//B4GAT1//BCL6//BDNF//BICDL1//BMP4//BMP6//CAMSAP3//CBX6//CCNB1//CD9//CDK5//CEBPA//CFL1//CLU//COL21A1//COL6A2//CRMP1//CXCR4//DAB2IP//DBNDD1//DEFB1//DIO3//DNER//DOCK10//DPYSL2//DYNLL1//EDN1//EFHD1//EFNA2//EFNA3//EFNA4//EFNA5//EFNB1//EFNB2//EHD1//EN1//EN2//ENAH//EPHB3//EREG//F2RL1//FGF18//FGF19//FGFR1//FOXC2//FZD4//FZD7//G6PD//GAT…
GO:0000902	cell_morphogenesis	Biological Process	89	701	1492	18342	1.59184e-05	0.00061733	4.7981	1.56081	0.0596515	APP//ARC//ARTN//ATP7A//AURKA//B3GNT2//B4GAT1//BCL6//BDNF//CAP1//CDH17//CDH24//CDH5//CDK5//CLU//COL21A1//COL6A2//CRMP1//CXCR4//DAB2IP//DOCK10//DPYSL2//EFNA2//EFNA3//EFNA4//EFNA5//EFNB1//EFNB2//ENAH//EPHB3//FZD4//FZD7//HSP90AA1//ID2//IL7R//ILK//IRS2//ISL2//ITGA1//ITGAV//ITGB3//KIF3A//LHX2//LIPA//LRFN3//LRP4//MAP1A//MATN3//MNX1//MSX1//NECTIN1//NEFH//NEO1//NGFR//NOG//NPTX1//NR4A3//NRP2//NTN1//NYAP1//…
GO:0030279	negative_regulation_of_ossification	Biological Process	18	73	1492	18342	1.59568e-05	0.00061733	4.79705	3.03129	0.0120643	AXIN2//ECM1//HIF1A//ID2//KREMEN2//LRP4//NOCT//NOG//RANBP3L//RFLNB//RORB//SMAD6//SOX9//SRGN//TGFB1//TNF//TOB1//TWIST2
GO:0043408	regulation_of_MAPK_cascade	Biological Process	95	761	1492	18342	1.63961e-05	0.000630597	4.78526	1.53468	0.0636729	ADORA1//ADRA1B//ADRA2B//ADRB2//ALOX12B//APP//ARRB1//ARRB2//BMP4//BMP6//C1QL4//CAV1//CCL2//CCL26//CD81//CDON//CEACAM1//CRKL//CXCR4//CYR61//DAB2IP//DIRAS1//DNAJA1//DUSP10//DUSP14//DUSP6//DUSP9//EDN1//EPHB3//EPHB4//ERRFI1//F2RL1//FAM83D//FBLN1//FFAR4//FGF18//FGF19//FGFR1//FGFR4//FOXO1//FZD10//FZD4//FZD7//GAREM1//GCNT2//GDF11//HAVCR2//HMGCR//HSPH1//HYAL2//IGF2//IGFBP4//ILK//INHBB//ITGA1//ITGAV//JUN//…
GO:0007565	female_pregnancy	Biological Process	32	178	1492	18342	1.6485e-05	0.000630597	4.78291	2.21008	0.0214477	ABCC2//ADIPOR2//ADRA2B//AKR1B1//APOL2//BSG//CTSV//EMP2//ENDOU//EPOR//FBLN1//FOS//FOSB//HAVCR2//HMX3//HPGD//ITGA2//MAGED2//MMP2//MMP9//PAPPA//PGF//PRDM1//PTGS2//PTHLH//SLC38A2//SPHK2//SPP1//STC1//STS//TGFB1//VDR
GO:0001666	response_to_hypoxia	Biological Process	46	297	1492	18342	1.69394e-05	0.000641996	4.7711	1.90405	0.0308311	ADORA1//ANG//ANGPTL4//AQP1//AQP3//ARNT2//ATP1B1//ATP7A//CAV1//CCNB1//CPEB2//CXCR4//CYP1A1//EDN1//EGLN3//EGR1//HIF1A//HMOX1//ITGA2//KCNK3//LDHA//MMP14//MMP2//MTHFR//NDRG1//NKX3-1//PDK3//PGF//PINK1//PKM//PLOD2//PPARGC1A//PTGS2//SIRT4//SLC29A1//SLC9A1//STC1//TGFB1//TGFB2//TGFBR3//TIGAR//UBB//VASN//VEGFA//VEGFC//ZNF354A
GO:0050777	negative_regulation_of_immune_response	Biological Process	26	131	1492	18342	1.69716e-05	0.000641996	4.77028	2.43994	0.0174263	ANXA1//ARG2//ARRB2//BCL6//BST2//C4BPA//CEACAM1//COL3A1//DUSP10//FOXF1//GPR17//HAVCR2//HLX//HMOX1//IL13RA2//IL1RL1//IL27RA//IL7R//MICA//PPARG//SOCS5//TGFB1//TGFB2//TNF//TRAFD1//ZBTB7B
GO:0030278	regulation_of_ossification	Biological Process	33	187	1492	18342	1.82287e-05	0.000685741	4.73924	2.16945	0.022118	ACVR1//ADRB2//AXIN2//BMP4//BMP6//CEBPA//CEBPB//CYR61//ECM1//HIF1A//ID2//ILK//KREMEN2//LRP4//MSX2//NOCT//NOG//PHOSPHO1//PTGER4//RANBP3L//RFLNB//RORB//S1PR1//SMAD6//SOX9//SRGN//TGFB1//TGFB2//TNF//TOB1//TWIST2//WNT5A//WNT7B
GO:1903305	regulation_of_regulated_secretory_pathway	Biological Process	25	124	1492	18342	1.84849e-05	0.000691559	4.73318	2.47854	0.016756	C2CD4C//CACNA1G//CACNA1H//CDK5//CEACAM1//F2RL1//FES//FOXF1//GATA2//HMOX1//IL13RA2//RAB3A//RAB3D//RAC2//RIMS3//RIMS4//SCAMP5//SEPT5//STX1A//STXBP1//SYT12//SYT7//SYTL2//SYTL4//TC2N
GO:0009266	response_to_temperature_stimulus	Biological Process	31	171	1492	18342	1.87157e-05	0.000692583	4.72779	2.22866	0.0207775	ABCC2//ADORA1//ADRB2//ARRB2//BAG3//CD14//CLPB//DNAJA1//DNAJB4//FOS//FOXO1//HMOX1//HSBP1//HSP90AA1//HSPA1A//HSPA1B//HSPA1L//IER5//LPL//MAPT//MICA//MICB//NFKBIA//NTSR1//PPARG//PPARGC1A//PTGS2//SCARA5//SLC9A1//THRA//VGF
GO:0071453	cellular_response_to_oxygen_levels	Biological Process	31	171	1492	18342	1.87157e-05	0.000692583	4.72779	2.22866	0.0207775	AQP1//AQP3//ATP6V0D1//ATP6V1A//ATP7A//CAV1//CCNB1//CPEB2//CPEB4//EDN1//EGLN3//EGR1//FOXO1//HIF1A//HMOX1//KCNK3//NDRG1//NKX3-1//PDK3//PINK1//PPARG//PPARGC1A//PTGS2//SIRT4//SLC29A1//SLC9A1//STC1//TIGAR//UBB//VASN//VEGFA
GO:0097435	supramolecular_fiber_organization	Biological Process	62	444	1492	18342	1.89647e-05	0.000698005	4.72205	1.71667	0.041555	ADD3//ANG//APP//ARRB1//ATP7A//BCAR1//CAMSAP3//CAP1//CARMIL1//CDC42EP2//CFL1//COL1A1//COL3A1//COL5A3//CRIPT//DBN1//DES//EMP2//FAT1//FOXC2//FSCN1//FSD1//GSN//ILK//IQGAP2//KLHL41//KRT14//KRT19//KRT8//LOX//MAD2L2//MAPT//MSRB1//NCKAP5L//NEFH//P4HA1//PLOD2//PPP1R9B//RAC2//RFLNB//RHOB//RHOC//RHOU//RHOV//RND1//RND2//SHROOM2//SNCA//SORBS1//TGFB2//TMOD1//TMOD2//TMOD3//TMSB4X//TNNT1//TNXB//TPM3//TPPP//TUBG1…
GO:0061312	BMP_signaling_pathway_involved_in_heart_development	Biological Process	5	6	1492	18342	1.98015e-05	0.000724883	4.7033	10.2446	0.00335121	ACVR1//BMP4//MSX1//MSX2//NOG
GO:0043086	negative_regulation_of_catalytic_activity	Biological Process	103	845	1492	18342	1.99139e-05	0.0007251	4.70084	1.49851	0.0690349	ANGPTL4//ANXA1//APC//APP//AQP1//ARL6IP1//ARRB1//ARRB2//ATP7A//BCL2L12//BMP4//BST2//CAMK2N2//CAMSAP3//CAV1//CBLB//CDKN1C//CDKN2B//CDKN2D//CEACAM1//CEBPA//CHORDC1//CNN3//CPEB2//CST1//CST4//DAB2IP//DEPTOR//DHCR24//DNAJA1//DUSP10//DUSP14//DUSP6//DUSP9//ECM1//ERRFI1//FAM212A//FKBP1B//FURIN//FZD10//GCHFR//GLA//GMFG//GPR87//HEXIM1//HMGCR//HSPB1//HYAL2//IFIT1//ILK//IQGAP2//IRS2//LAMP3//MAD2L2//MAPK8IP1//…
GO:0022617	extracellular_matrix_disassembly	Biological Process	16	61	1492	18342	2.03701e-05	0.000737765	4.69101	3.22454	0.0107239	ADAMTS4//ADAMTS5//BSG//CTSL//CTSV//FURIN//GSN//HTRA1//MMP13//MMP14//MMP15//MMP2//MMP9//SH3PXD2B//TIMP1//TLL1
GO:0030182	neuron_differentiation	Biological Process	116	978	1492	18342	2.06923e-05	0.000745471	4.68419	1.45813	0.077748	APP//ARC//ARTN//ATP7A//AURKA//B3GNT2//B4GAT1//BDNF//BICDL1//BMP4//CAMSAP3//CBX6//CDK5//CEBPB//CRMP1//CXCR4//DAB2IP//DBNDD1//DIO3//DLL4//DLX2//DOCK10//DPYSL2//EFHD1//EFNA2//EFNA3//EFNA4//EFNA5//EFNB1//EFNB2//EHD1//EN1//EN2//ENAH//EPHB3//EPOP//FGFR1//FZD10//FZD4//FZD7//GATA2//GPRIN1//HIF1A//HOXC10//HS6ST1//HSP90AA1//ID2//ILK//IRS2//ISL2//ITGA1//ITM2C//JUN//KDM1A//KIF3A//LHX2//LRFN3//LRP4//MAP1A//MA…
GO:0035556	intracellular_signal_transduction	Biological Process	183	1685	1492	18342	2.15204e-05	0.000771223	4.66715	1.33515	0.122654	ADGRB2//ADGRG1//ADGRL1//ADRA1B//ADRA2B//ADRB2//AKR1B1//ARHGAP31//ARHGAP5//ARHGDIB//ARHGEF12//ARTN//ASB6//ATP1B1//AURKA//BAK1//BCAP31//BCAR3//BCL10//BCL6//C15orf62//CAMK1D//CAMK2G//CARHSP1//CCL2//CCNB1//CCRL2//CD14//CDC42EP2//CDC42EP4//CDC42EP5//CEBPB//CFL1//CHUK//CRKL//CSF2//CXCL8//CXCR4//DAB2IP//DDAH1//DDAH2//DDX58//DEDD2//DEFB1//DEPTOR//DGKZ//DHCR24//DOCK10//DOCK11//DOCK4//DOK3//DUSP6//DUSP9//E…
GO:0016126	sterol_biosynthetic_process	Biological Process	14	49	1492	18342	2.33115e-05	0.000831036	4.63243	3.51245	0.00938338	CES1//CYP51A1//DHCR24//DHCR7//EBP//FDFT1//G6PD//HMGCR//INSIG1//MSMO1//MVK//NSDHL//SC5D//SQLE
GO:0050678	regulation_of_epithelial_cell_proliferation	Biological Process	54	373	1492	18342	2.36133e-05	0.000837411	4.62684	1.77977	0.036193	ANG//ATP7A//BMP4//BMP6//CAV1//CCL2//CCL26//CDKN1C//CDKN2B//CEACAM1//CTSV//DAB2IP//DLL4//DUSP10//ECM1//EGFL7//EGR3//EREG//ERRFI1//FGF18//FGFBP1//FGFR1//FZD7//GATA2//GLUL//HIF1A//HMOX1//HTRA1//ITGB3//JUN//KDM5B//NGFR//NKX3-1//NOG//NR4A1//NR4A3//NRP2//PDCL3//PGF//PPARG//SERPINB5//SOX9//SPARC//STAT3//SULF2//TGFB1//TGFB2//TGFBR3//TNF//VDR//VEGFA//VEGFC//WNT5A//ZNF703
GO:0060840	artery_development	Biological Process	19	82	1492	18342	2.42475e-05	0.000855446	4.61533	2.84851	0.0127346	BMP4//COL3A1//DLL4//FOXC2//FOXF1//HPGD//LOX//LRP1//LTBP1//LUZP1//NKX3-1//NOG//NOTCH3//PRDM1//SMAD6//SOX4//TGFB2//VEGFA//WNT11
GO:0042271	susceptibility_to_natural_killer_cell_mediated_cytotoxicity	Biological Process	7	13	1492	18342	2.57157e-05	0.00090257	4.5898	6.61961	0.00469169	MICA//MICB//NECTIN2//RAET1G//RAET1L//ULBP2//ULBP3
GO:0048762	mesenchymal_cell_differentiation	Biological Process	28	150	1492	18342	2.68942e-05	0.000936638	4.57034	2.2948	0.0187668	ACVR1//BMP4//CFL1//EDN1//EFNB1//FAM83D//FGF19//FGFR1//FOXC2//FOXF2//HIF1A//MSX1//MSX2//NOG//OLFM1//RANBP3L//RDH10//RFLNB//SEMA6B//SEMA6C//SEMA7A//SNAI1//SOX9//TGFB1//TGFB2//TGFBR3//WNT11//WNT5A
GO:0051216	cartilage_development	Biological Process	30	166	1492	18342	2.69615e-05	0.000936638	4.56926	2.22173	0.0201072	ATP7A//AXIN2//BMP4//BMP6//COL1A1//COL21A1//COL6A2//CYR61//DLX2//EDN1//FGF18//FGFR1//HIF1A//HOXA11//HYAL2//MATN3//MMP13//MSX1//MSX2//NOG//RARB//SNAI1//SOX9//STC1//SULF2//TGFB1//THRA//TIMP1//WNT5A//WNT7B
GO:0006469	negative_regulation_of_protein_kinase_activity	Biological Process	41	259	1492	18342	2.84846e-05	0.000979639	4.54539	1.94609	0.0274799	APC//BMP4//CAMK2N2//CAV1//CBLB//CDKN1C//CDKN2B//CDKN2D//CEACAM1//CEBPA//CHORDC1//DAB2IP//DEPTOR//DNAJA1//DUSP10//DUSP14//DUSP6//DUSP9//ERRFI1//FAM212A//GMFG//HEXIM1//HMGCR//HSPB1//HYAL2//ILK//MAPK8IP1//PLK1//PRKAR2B//RGS14//RGS2//RGS3//RTN4RL1//RTN4RL2//SOCS1//SOCS5//SPRY4//SRCIN1//TESC//TRIB1//TRIB2
GO:0017157	regulation_of_exocytosis	Biological Process	33	191	1492	18342	2.84871e-05	0.000979639	4.54535	2.12402	0.022118	ANXA1//C2CD4C//CACNA1G//CACNA1H//CDK5//CEACAM1//F2RL1//FES//FOXF1//GATA2//HAP1//HMOX1//IL13RA2//LGI3//NSF//RAB26//RAB3A//RAB3D//RAC2//RALA//RIMS3//RIMS4//SCAMP5//SDCBP//SEPT5//SNCA//STX1A//STXBP1//SYT12//SYT7//SYTL2//SYTL4//TC2N
GO:0048661	positive_regulation_of_smooth_muscle_cell_proliferation	Biological Process	20	90	1492	18342	2.86986e-05	0.000981955	4.54214	2.7319	0.0134048	AKR1B1//BMP4//EDN1//EREG//HBEGF//HMGCR//HMOX1//HPGD//ID2//ITGA2//JUN//MMP2//MMP9//NOTCH3//NR4A3//PPARGC1A//PTGS2//S1PR1//TGM2//TNF
GO:0000122	negative_regulation_of_transcription_by_RNA_polymerase_II	Biological Process	104	863	1492	18342	2.91809e-05	0.000993463	4.5349	1.4815	0.0697051	ARID5B//BAG3//BCL6//BHLHE41//BMP4//BMP6//BRMS1//CAV1//CBX6//CCND3//CEBPA//CEBPB//CIC//CREB3L1//CREM//CRY1//DAB2IP//DLL4//DLX2//DLX4//DNAJB1//DNAJB4//EDN1//EGR1//EN1//ETV3//FGFR1//FOSB//FOXC2//FOXF1//FOXO1//FOXO6//FOXQ1//GATA2//HES2//HEXIM1//HIST1H1C//HOXB13//HOXB4//HOXD8//HSBP1//HSPA1A//ID2//IGF2//IRF2BP1//IRF2BPL//JUN//KDM1A//KDM5B//KLF5//MAD2L2//MIER3//MOSPD1//MSX1//MSX2//MYPOP//NFIL3//NKX3-2//…
GO:0016032	viral_process	Biological Process	76	585	1492	18342	3.02969e-05	0.00102633	4.5186	1.59711	0.0509383	AP1S1//AP2S1//APOBEC3C//ATG5//ATP6V0C//CAV1//CCDC86//CCL2//CD81//CEBPA//CENPA//CREB3//CXCR4//DDX58//DYNLL1//EFNB2//FADD//FBLN1//FURIN//GTF2B//HLA-A//HLA-B//HSPA1A//HSPA1B//HYAL2//IFIT1//IL2RG//ITGA2//ITGA5//ITGAV//ITGB3//KAT2A//KPNA2//KPNA3//KRT18//KRT19//KRT8//LAMP3//LCK//LDLR//LIG4//MFGE8//MICA//MICB//MORC3//MVB12A//NECTIN1//NECTIN2//NECTIN4//NFKBIA//NXF1//PC//PDCL3//PSMA4//PSMB3//PSMB6//RAB29/…
GO:0022414	reproductive_process	Biological Process	153	1374	1492	18342	3.07977e-05	0.00103813	4.51148	1.36893	0.102547	ABCC2//ACVR1//ADAMTS1//ADGRG1//ADIPOR2//ADRA2B//AKR1B1//AKR1C3//ANG//ANXA1//APOL2//APP//ARID5B//ARNTL//ARRB1//ARRB2//AURKA//AZIN2//B4GALNT1//BAK1//BCAP31//BCL6//BMP4//BMP6//BSG//BTG1//CCNB1//CCNB3//CCNF//CD9//CEBPA//CEBPB//CKS2//CNTFR//COL9A3//CREM//CSF2//CTSV//CYP1A1//CYP26B1//CYR61//DEFB1//DHCR24//DLX3//DNAJA1//DYNLL1//EDN1//EGR1//EME2//EMP2//ENDOU//EPOR//EREG//ESPL1//ETNK2//FBLN1//FOS//FOSB//F…
GO:0006082	organic_acid_metabolic_process	Biological Process	119	1018	1492	18342	3.11124e-05	0.00104357	4.50707	1.43707	0.0797587	AARS2//ABCC2//ABCC5//ACOT7//ACSL1//ACSS2//ADIPOR2//AFMID//AHCYL2//AKR1C1//AKR1C2//AKR1C3//ALDOC//ALOX12B//ARG2//ATP7A//AZIN2//B3GNT2//B3GNT7//B4GALT5//B4GAT1//BPNT1//BSG//BTD//CARMIL1//CEMIP//CES1//CHPF//CHST2//CHST6//CHST7//CKB//CRABP2//CREM//CYB5A//CYP1A1//CYP26B1//CYP2S1//DCXR//DDAH1//DDAH2//DHRS9//EDN1//EGLN3//ELOVL3//ENO3//ERO1B//FASN//GFPT2//GGH//GLCE//GLS//GLUL//GNE//GSTM4//HIF1A//HK1//HPG…
GO:0032535	regulation_of_cellular_component_size	Biological Process	54	377	1492	18342	3.18598e-05	0.0010634	4.49676	1.76088	0.036193	ADD3//AP1AR//AQP1//ARHGAP40//ATP7A//BDNF//C15orf38-AP3S2//C15orf62//CARMIL1//CCL26//CDC42EP2//CDC42EP4//CDC42EP5//CDK5//CDKL5//CFL1//CRABP2//DEPTOR//DPYSL2//EDN1//EFNA5//F2RL1//GMFG//GSN//IL7R//ILK//IQGAP2//KDM1A//MAPT//MSN//MTPN//NTN1//OLFM1//PTPRS//RND2//SEMA6B//SEMA6C//SEMA7A//SHANK3//SLC12A2//SLC12A6//SLC12A8//SLC9A3R1//SPP1//TMOD1//TMOD2//TMOD3//TMSB4X//VASP//VAV3//VEGFA//WASF1//WNT5A//WNT7B
GO:0048565	digestive_tract_development	Biological Process	25	128	1492	18342	3.25011e-05	0.00107516	4.4881	2.40109	0.016756	BMP4//CCNB1//COL3A1//CXCL8//CYP1A1//EPHB3//FOXF1//FOXL1//GATA2//GATA5//HIF1A//HLX//ID2//KLF5//NKX3-2//PRDM1//RARB//RARRES2//SLC4A2//TGFB1//TGFB2//TIGAR//TNF//WNT11//WNT5A
GO:0033673	negative_regulation_of_kinase_activity	Biological Process	43	278	1492	18342	3.2528e-05	0.00107516	4.48774	1.90152	0.0288204	APC//BMP4//CAMK2N2//CAV1//CBLB//CDKN1C//CDKN2B//CDKN2D//CEACAM1//CEBPA//CHORDC1//DAB2IP//DEPTOR//DNAJA1//DUSP10//DUSP14//DUSP6//DUSP9//ERRFI1//FAM212A//GMFG//HEXIM1//HMGCR//HSPB1//HYAL2//ILK//IRS2//MAPK8IP1//MAPT//PLK1//PRKAR2B//RGS14//RGS2//RGS3//RTN4RL1//RTN4RL2//SOCS1//SOCS5//SPRY4//SRCIN1//TESC//TRIB1//TRIB2
GO:0002366	leukocyte_activation_involved_in_immune_response	Biological Process	78	606	1492	18342	3.30232e-05	0.00108626	4.48118	1.58234	0.0522788	ACPP//AGPAT2//ALDOC//ATP6V0A1//ATP6V0C//ATP7A//ATP8A1//BST2//CAP1//CD14//CD58//CD63//CDH17//CEACAM1//CMTM6//CRISPLD2//CTSD//CYSTM1//DGAT1//DOCK10//DOCK11//DOK3//DYNLL1//F2RL1//FABP5//GGH//GHDC//GLA//GLIPR1//GM2A//GMFG//GOLGA7//GSN//HAVCR2//HSP90AA1//HSPA1A//HSPA1B//IDH1//IL18R1//IQGAP2//ITGAV//LFNG//LIG4//MCEMP1//METTL7A//MMP9//NEU1//NR4A3//OSTF1//PGAM1//PKM//PLA2G3//PLEKHO2//PRDX4//PRTN3//PSMA2/…
GO:0008202	steroid_metabolic_process	Biological Process	40	252	1492	18342	3.33023e-05	0.00109017	4.47753	1.95136	0.0268097	ABCG1//AKR1B1//AKR1C1//AKR1C2//AKR1C3//APOL2//APP//CACNA1H//CEBPA//CES1//CYP11A1//CYP1A1//CYP24A1//CYP26B1//CYP3A5//CYP3A7//CYP51A1//DHCR24//DHCR7//DHRS9//EBP//FDFT1//FGFR1//G6PD//HMGCR//HSD17B11//INSIG1//LDLR//LIPA//LIPE//MSMO1//MVK//NSDHL//PPARGC1A//SC5D//SOAT1//SPP1//SQLE//STS//VDR
GO:0000003	reproduction	Biological Process	153	1377	1492	18342	3.44529e-05	0.00112244	4.46277	1.36595	0.102547	ABCC2//ACVR1//ADAMTS1//ADGRG1//ADIPOR2//ADRA2B//AKR1B1//AKR1C3//ANG//ANXA1//APOL2//APP//ARID5B//ARNTL//ARRB1//ARRB2//AURKA//AZIN2//B4GALNT1//BAK1//BCAP31//BCL6//BMP4//BMP6//BSG//BTG1//CCNB1//CCNB3//CCNF//CD9//CEBPA//CEBPB//CKS2//CNTFR//COL9A3//CREM//CSF2//CTSV//CYP1A1//CYP26B1//CYR61//DEFB1//DHCR24//DLX3//DNAJA1//DYNLL1//EDN1//EGR1//EME2//EMP2//ENDOU//EPOR//EREG//ESPL1//ETNK2//FBLN1//FOS//FOSB//F…
GO:0032963	collagen_metabolic_process	Biological Process	15	57	1492	18342	3.5216e-05	0.00114184	4.45326	3.23515	0.0100536	COL15A1//COL1A1//CTSD//CTSL//FURIN//HIF1A//MMP13//MMP14//MMP15//MMP2//MMP9//P3H1//PLOD2//PRTN3//TNXB
GO:0001822	kidney_development	Biological Process	40	253	1492	18342	3.65147e-05	0.00117651	4.43753	1.94365	0.0268097	ADAMTS1//AKR1B1//ARG2//ARID5B//BMP4//BMP6//CALB1//CRLF1//EGR1//FGFR1//FOXC2//GCNT3//GDF11//GPR4//HOXA11//HOXC11//HPGD//HYAL2//ID2//ILK//JMJD6//LRP4//MMP17//NKX3-1//NOG//NOTCH3//PGF//RARB//RDH10//SMAD6//SOX4//SOX9//SULF2//TGFB1//TGFB2//VEGFA//WNT11//WNT6//WNT7B//ZNF354A
GO:0044092	negative_regulation_of_molecular_function	Biological Process	134	1178	1492	18342	3.66308e-05	0.00117651	4.43615	1.39842	0.0898123	ADRB2//ANGPTL4//ANXA1//APC//APP//AQP1//ARL6IP1//ARRB1//ARRB2//ATP7A//AURKA//BCL2L12//BMP4//BRMS1//BST2//CAMK2N2//CAMSAP3//CAV1//CBLB//CDKN1C//CDKN2B//CDKN2D//CEACAM1//CEBPA//CHORDC1//CHUK//CNN3//CPEB2//CRMP1//CST1//CST4//DAB2IP//DEPTOR//DHCR24//DNAJA1//DUSP10//DUSP14//DUSP6//DUSP9//ECM1//ERRFI1//FAM212A//FKBP1B//FURIN//FZD10//GCHFR//GEM//GLA//GMFG//GPR87//HAVCR2//HEXIM1//HMGCR//HMOX1//HSPB1//HYAL…
GO:0048167	regulation_of_synaptic_plasticity	Biological Process	31	177	1492	18342	3.75425e-05	0.00120012	4.42548	2.15311	0.0207775	ABHD6//ADORA1//APP//ARC//CALB1//CALB2//CDC20//CDK5//DBN1//JPH3//KAT2A//MAP1A//MAPT//NEURL1//NPTN//NRGN//PLK2//PTGS2//RAB3A//RGS14//RIMS3//RIMS4//SERPINE2//SHANK3//SNCA//STXBP1//SYNGR1//SYT12//SYT7//UNC13A//VGF
GO:0042119	neutrophil_activation	Biological Process	66	493	1492	18342	3.97811e-05	0.00126476	4.40032	1.64579	0.0442359	ACPP//AGPAT2//ALDOC//ATP6V0A1//ATP6V0C//ATP8A1//BST2//CAP1//CD14//CD58//CD63//CEACAM1//CMTM6//CRISPLD2//CTSD//CXCL8//CYSTM1//DGAT1//DOK3//DYNLL1//F2RL1//FABP5//GGH//GHDC//GLA//GLIPR1//GM2A//GMFG//GOLGA7//GSN//HSP90AA1//HSPA1A//HSPA1B//IDH1//IQGAP2//ITGAV//MCEMP1//METTL7A//MMP9//NEU1//OSTF1//PGAM1//PKM//PLEKHO2//PRDX4//PRTN3//PSMA2//PSMD1//PSMD11//PSMD14//PSMD3//PTX3//RAB3A//RAB3D//RAB5C//SDCBP//S…
GO:1900034	regulation_of_cellular_response_to_heat	Biological Process	13	45	1492	18342	3.99357e-05	0.00126476	4.39864	3.55147	0.00871314	BAG3//CHORDC1//DNAJB1//HSBP1//HSP90AA1//HSPA1A//HSPA1B//HSPA1L//HSPB8//HSPH1//IER5//MAPKAPK2//MAPT
GO:0033674	positive_regulation_of_kinase_activity	Biological Process	76	590	1492	18342	4.04516e-05	0.00127516	4.39306	1.58358	0.0509383	ACSL1//ADORA1//ADRA2B//ADRB2//AFAP1L2//ANG//ARRB1//BDNF//BMP4//CCNB1//CCND2//CCND3//CD81//CDK5//CEMIP//CKS2//CLU//CRKL//CXCR4//CYR61//DAB2IP//DIRAS1//DUSP6//DUSP9//EDN1//EEF1A2//EFNA5//EGR1//EMP2//EPHB3//EPHB4//EREG//FGF18//FGFR1//FGFR4//FZD10//FZD4//GPRC5B//HSP90AA1//HSPH1//IGF2//ILK//ITGA1//ITGB3//MADD//MALT1//MAP2K3//MAP2K6//MAP3K10//MAP3K12//MAP3K8//MAPKAPK2//MAPT//NEURL1//NKX3-1//PAK4//PAK6/…
GO:0071260	cellular_response_to_mechanical_stimulus	Biological Process	18	78	1492	18342	4.17293e-05	0.00130938	4.37956	2.83698	0.0120643	AQP1//ATP1A1//BAG3//BAK1//BCL10//BMP6//COL1A1//FADD//ITGA2//MTPN//PTGER4//PTGS2//SLC38A2//SLC9A1//SOX9//TGFB1//TLR4//WNT11
GO:0071901	negative_regulation_of_protein_serine|threonine_kinase_activity	Biological Process	26	138	1492	18342	4.35967e-05	0.00133787	4.36055	2.31618	0.0174263	APC//BMP4//CAV1//CDKN1C//CDKN2B//CDKN2D//CEBPA//CHORDC1//DAB2IP//DNAJA1//DUSP10//DUSP14//DUSP6//DUSP9//FAM212A//HEXIM1//HMGCR//HSPB1//HYAL2//MAPK8IP1//PLK1//PRKAR2B//RGS14//RGS2//RGS3//SPRY4
GO:0033489	cholesterol_biosynthetic_process_via_desmosterol	Biological Process	4	4	1492	18342	4.36197e-05	0.00133787	4.36032	12.2936	0.00268097	DHCR24//DHCR7//EBP//SC5D
GO:0033490	cholesterol_biosynthetic_process_via_lathosterol	Biological Process	4	4	1492	18342	4.36197e-05	0.00133787	4.36032	12.2936	0.00268097	DHCR24//DHCR7//EBP//SC5D
GO:0045629	negative_regulation_of_T-helper_2_cell_differentiation	Biological Process	4	4	1492	18342	4.36197e-05	0.00133787	4.36032	12.2936	0.00268097	ANXA1//BCL6//HLX//SOCS5
GO:1903278	positive_regulation_of_sodium_ion_export_across_plasma_membrane	Biological Process	4	4	1492	18342	4.36197e-05	0.00133787	4.36032	12.2936	0.00268097	ATP1B1//ATP1B2//ATP1B3//FXYD1
GO:0048705	skeletal_system_morphogenesis	Biological Process	37	229	1492	18342	4.39069e-05	0.00134064	4.35747	1.9863	0.0247989	ARID5B//AXIN2//BMP4//BMP6//COL1A1//COL21A1//COL6A2//CSRNP1//CYP26B1//DLX2//FGF18//FGFR1//FOXC2//HOXA11//HOXB4//HOXC11//HOXD8//HYAL2//INSIG1//MATN3//MMP13//MMP14//MMP2//MSX1//MSX2//NKX3-2//NOG//PHOSPHO1//RARB//RDH10//RFLNB//SH3PXD2B//SOX9//STC1//TGFB1//THRA//ZFAND5
GO:0002009	morphogenesis_of_an_epithelium	Biological Process	58	419	1492	18342	4.48339e-05	0.00135742	4.34839	1.70173	0.038874	ACVR1//ATP7A//BCL10//BMP4//CAMSAP3//CEACAM1//CFL1//COL4A1//CTSV//CYR61//DLL4//EDN1//FGFR1//FOXC2//FOXF1//FOXQ1//HBEGF//HIF1A//HOXA11//HOXB13//HOXB4//ILK//ITGA5//KAT2A//KDM5B//KRT16//LHX2//LIN7C//LUZP1//MMP14//MSN//MSX2//NKX3-1//NOG//NTN1//PGF//RALA//RBM15//RDH10//RHOB//RHOC//SERPINB5//SLC9A3R1//SNAI1//SOX4//SOX9//TBX3//TGFB1//TGFB2//TGM2//VASP//VDR//VEGFA//VEGFC//WNT11//WNT5A//WNT6//WNT7B
GO:0046886	positive_regulation_of_hormone_biosynthetic_process	Biological Process	6	10	1492	18342	4.52233e-05	0.00135742	4.34464	7.37614	0.00402145	BMP6//EGR1//HIF1A//POR//PPARGC1A//TNF
GO:0061081	positive_regulation_of_myeloid_leukocyte_cytokine_production_involved_in_immune_response	Biological Process	6	10	1492	18342	4.52233e-05	0.00135742	4.34464	7.37614	0.00402145	BCL10//GPRC5B//NR4A3//SEMA7A//SPON2//WNT5A
GO:0048598	embryonic_morphogenesis	Biological Process	72	553	1492	18342	4.53594e-05	0.00135742	4.34333	1.60061	0.0482574	ACVR1//BCL10//BMP4//CDON//CFL1//CRABP2//CYP26B1//CYR61//DLL4//DLX2//EDN1//EN1//EXT2//FGFR1//FOXC2//FOXF1//GATA2//HIF1A//HLX//HMX2//HMX3//HOXA11//HOXB4//HOXC10//HOXC11//HSBP1//ID2//IGF2//INSIG1//ITGA2//ITGA5//ITGA7//ITGAV//ITGB3//KAT2A//LHX2//LRP4//LUZP1//MAFB//MFAP2//MMP14//MMP15//MMP2//MMP9//MSX1//MSX2//NKX3-2//NOG//NR4A3//NTN1//POGLUT1//RALA//RARB//RDH10//RNF2//SLC9A3R1//SNAI1//SOX4//SOX9//TBX3…
GO:0051345	positive_regulation_of_hydrolase_activity	Biological Process	94	771	1492	18342	4.54534e-05	0.00135742	4.34243	1.49883	0.0630027	ADRM1//AGFG2//ANG//APP//ARHGAP31//ARHGAP40//ARHGAP5//ARHGDIB//ARHGEF12//ARRB1//ATP1B1//ATP1B2//ATP1B3//AXIN2//BAK1//BCAP31//BCL10//BDNF//C15orf62//CAV1//CCL2//CCL26//CDC42EP2//CDC42EP4//CDC42EP5//CDKL5//CYR61//DAB2IP//DNAJA1//DNAJB1//DNAJB11//DNAJB4//DOCK10//DOCK11//DOCK4//DYNLL1//EFNA3//EGLN3//ERRFI1//F2RL1//FADD//FAM13A//FAM13B//FBLN1//FGFR1//FZD10//GM2A//GRAMD4//GSN//HSPA1A//ITGA1//ITGA2//JUN/…
GO:0045732	positive_regulation_of_protein_catabolic_process	Biological Process	36	221	1492	18342	4.64453e-05	0.00138099	4.33306	2.00257	0.0241287	APC//AURKA//BCAP31//C4BPA//CAV1//CD81//CEBPA//CLU//DAB2IP//FOXO1//FURIN//HSP90AA1//HSPA1A//HSPA1B//LDLR//LRP1//MSN//MYLIP//NKD2//NSF//OAZ1//OAZ2//PLK1//PLK2//PSMC4//RNF139//RNF14//RNF144B//SOCS5//SOX9//TNF//TNFRSF1B//TRIB1//TRIB2//VCP//WNT5A
GO:0002718	regulation_of_cytokine_production_involved_in_immune_response	Biological Process	16	65	1492	18342	4.77036e-05	0.00140327	4.32145	3.02611	0.0107239	ATG5//BCL10//BCL6//BST2//F2RL1//GPRC5B//HMOX1//MALT1//NR4A3//RAET1G//SEMA7A//SPON2//TGFB1//TGFB2//TNF//WNT5A
GO:0036376	sodium_ion_export_across_plasma_membrane	Biological Process	7	14	1492	18342	4.78129e-05	0.00140327	4.32045	6.14678	0.00469169	ATP1A1//ATP1A3//ATP1B1//ATP1B2//ATP1B3//FXYD2//SLC9A1
GO:0070293	renal_absorption	Biological Process	7	14	1492	18342	4.78129e-05	0.00140327	4.32045	6.14678	0.00469169	AKR1C3//AQP3//GSN//HYAL2//MAGED2//SGK1//SLC9A3R1
GO:0001938	positive_regulation_of_endothelial_cell_proliferation	Biological Process	22	108	1492	18342	4.87536e-05	0.00142473	4.31199	2.50424	0.0147453	ANG//BMP4//BMP6//CCL26//ECM1//EGFL7//EGR3//FGFBP1//FGFR1//GATA2//HIF1A//HMOX1//ITGB3//JUN//NR4A1//NRP2//PDCL3//PGF//STAT3//VEGFA//VEGFC//WNT5A
GO:0006986	response_to_unfolded_protein	Biological Process	28	155	1492	18342	4.96947e-05	0.00144603	4.30369	2.22077	0.0187668	ATP6V0D1//CCL2//CREB3//CREB3L1//CREB3L3//CXCL8//CXXC1//DNAJA1//DNAJB1//DNAJB11//DNAJB4//EXTL2//FBXO6//FKBP14//HSP90AA1//HSPA1A//HSPA1B//HSPA1L//HSPB1//HSPH1//PPP2R5B//PREB//TATDN2//TOR1B//TSPYL2//VCP//YOD1//ZBTB17
GO:0006468	protein_phosphorylation	Biological Process	115	988	1492	18342	5.0853e-05	0.00147344	4.29368	1.43093	0.0770777	ACVR1//APP//ARTN//AURKA//BMP4//CAMK1D//CAMK2G//CCL2//CCNB1//CCNB3//CCND2//CCND3//CCNF//CCNG2//CDC42EP5//CDK19//CDK5//CDK9//CDKL5//CFL1//CHUK//CRKL//CRY1//CSF2//DAB2IP//DUSP6//DUSP9//DYRK3//EFNA3//EFNA4//EFNB1//EFNB2//EPHB3//EPHB4//EREG//FASTKD5//FES//FGF18//FGF19//FGFR1//FGFR1OP2//FGFR4//FYB1//GMFG//GRK5//HBEGF//HCST//HSP90AA1//HSPB8//IL2RG//IL31RA//ILK//IRS2//ITGAV//KBTBD7//KCNH2//KCNH3//KCNH4//…
GO:0007411	axon_guidance	Biological Process	37	231	1492	18342	5.31066e-05	0.00153222	4.27485	1.9691	0.0247989	APP//ARTN//B3GNT2//B4GAT1//BDNF//CDK5//CRMP1//CXCR4//DPYSL2//EFNA2//EFNA3//EFNA4//EFNA5//EFNB1//EFNB2//ENAH//EPHB3//IRS2//ISL2//KIF3A//LHX2//NECTIN1//NEO1//NGFR//NOG//NR4A3//NRP2//NTN1//SCN1B//SEMA6C//SH3KBP1//SHANK3//SPON2//UNC5B//VASP//VEGFA//WNT5A
GO:0048870	cell_motility	Biological Process	121	1053	1492	18342	5.70258e-05	0.00163835	4.24393	1.41265	0.0810992	ACVR1//ADGRG1//ANG//ANXA1//APC//ARC//ARID5B//ARRB2//ARTN//ATP1B1//ATP1B2//ATP1B3//BAMBI//BCAR1//BSG//BTG1//C16orf45//CAP1//CARMIL1//CAV1//CCL2//CCL26//CCRL2//CD58//CD63//CDK5//CDKL5//CEACAM1//CFL1//COL1A1//CUZD1//CXCL14//CXCL8//CXCR4//CYR61//DAB2IP//DGKZ//DIXDC1//DNAJA1//DNER//DOCK4//EDN1//EFNB1//EFNB2//EGR3//ELMO2//EMP2//EPHB3//EPHB4//ESAM//F2RL1//FAM83D//FAT1//FES//FGF19//FGFR1//FGFR4//FSCN1//F…
GO:0003281	ventricular_septum_development	Biological Process	16	66	1492	18342	5.82661e-05	0.00166695	4.23458	2.98026	0.0107239	ACVR1//BMP4//CYR61//ID2//LTBP1//LUZP1//NOG//PRDM1//RBM15//SMAD6//SOX4//TBX3//TGFB2//TGFBR3//WNT11//WNT5A
GO:1901653	cellular_response_to_peptide	Biological Process	45	303	1492	18342	5.9302e-05	0.00168949	4.22693	1.82578	0.0301609	ADRB2//AKR1B1//APC//APP//ATP1A3//ATP6V0A1//ATP6V0B//ATP6V0C//ATP6V0D1//ATP6V0E1//ATP6V1A//BCAR1//CAV1//CDK5//CEACAM1//CPEB2//CYP11A1//EDN1//ERRFI1//FOXC2//FOXO1//FOXO6//GLP2R//IGF2//INHBB//IRS2//KLF5//LPIN1//LRP1//NGFR//NR4A1//NR4A3//PDK4//PIK3R3//PKM//POR//PPARG//PRKAR2B//SH2B2//SLC9A1//SORBS1//STAT3//TBC1D4//TGFB1//TLR4
GO:0010565	regulation_of_cellular_ketone_metabolic_process	Biological Process	23	117	1492	18342	5.95813e-05	0.00169037	4.22489	2.41668	0.0154155	ADIPOR2//AKR1C3//ANXA1//BMP6//CAV1//CEACAM1//EGR1//FGF19//FGFR4//INSIG1//IRS2//NR4A3//OAZ1//OAZ2//PDK3//PDK4//PDP2//PPARG//PPARGC1A//PTGS2//SIRT4//SLC45A3//SNCA
GO:0043312	neutrophil_degranulation	Biological Process	64	481	1492	18342	6.22719e-05	0.00175937	4.20571	1.63573	0.0428954	ACPP//AGPAT2//ALDOC//ATP6V0A1//ATP6V0C//ATP8A1//BST2//CAP1//CD14//CD58//CD63//CEACAM1//CMTM6//CRISPLD2//CTSD//CYSTM1//DGAT1//DOK3//DYNLL1//FABP5//GGH//GHDC//GLA//GLIPR1//GM2A//GMFG//GOLGA7//GSN//HSP90AA1//HSPA1A//HSPA1B//IDH1//IQGAP2//ITGAV//MCEMP1//METTL7A//MMP9//NEU1//OSTF1//PGAM1//PKM//PLEKHO2//PRDX4//PRTN3//PSMA2//PSMD1//PSMD11//PSMD14//PSMD3//PTX3//RAB3A//RAB3D//RAB5C//SDCBP//SERPINA1//SLC2A…
GO:0055123	digestive_system_development	Biological Process	26	141	1492	18342	6.36845e-05	0.00178668	4.19597	2.2669	0.0174263	BMP4//CCNB1//COL3A1//CXCL8//CYP1A1//EPHB3//FOXF1//FOXL1//GATA2//GATA5//HIF1A//HLX//ID2//IGF2//KLF5//NKX3-2//PRDM1//RARB//RARRES2//SLC4A2//TGFB1//TGFB2//TIGAR//TNF//WNT11//WNT5A
GO:0051047	positive_regulation_of_secretion	Biological Process	55	396	1492	18342	6.37671e-05	0.00178668	4.1954	1.70744	0.0368633	ADORA1//ALOX12B//ANG//AQP1//ARRB1//ATG5//BMP6//CACNA1G//CACNA1H//CD14//CD58//CDK5//CHUK//DDX58//DYNLL1//EDN1//F2RL1//FGFR1//GAL//GATA2//GLUL//HAVCR2//HIF1A//HYAL2//IL1RL1//INHBB//IRS2//LPL//MAP2K6//NKX3-1//NLGN2//NTSR1//PANX1//PINK1//PLA2R1//PTGER4//RAB3A//RAB3D//SCAMP5//SDCBP//SNCA//SOX4//SPP1//STX1A//STXBP1//SYT7//SYTL2//SYTL4//TGFB1//TGFB2//TLR4//TNF//UNC13A//VEGFC//WNT5A
GO:0097485	neuron_projection_guidance	Biological Process	37	233	1492	18342	6.40254e-05	0.00178668	4.19365	1.9522	0.0247989	APP//ARTN//B3GNT2//B4GAT1//BDNF//CDK5//CRMP1//CXCR4//DPYSL2//EFNA2//EFNA3//EFNA4//EFNA5//EFNB1//EFNB2//ENAH//EPHB3//IRS2//ISL2//KIF3A//LHX2//NECTIN1//NEO1//NGFR//NOG//NR4A3//NRP2//NTN1//SCN1B//SEMA6C//SH3KBP1//SHANK3//SPON2//UNC5B//VASP//VEGFA//WNT5A
GO:1902895	positive_regulation_of_pri-miRNA_transcription_by_RNA_polymerase_II	Biological Process	9	24	1492	18342	6.45787e-05	0.00179476	4.18991	4.61009	0.00603217	FOS//HIF1A//JUN//KLF5//NGFR//SMAD6//STAT3//TGFB1//TGFB2
GO:0032757	positive_regulation_of_interleukin-8_production	Biological Process	13	47	1492	18342	6.60041e-05	0.00182692	4.18043	3.40035	0.00871314	AFAP1L2//BCL10//CD14//CD58//DDX58//F2RL1//FADD//HSPA1A//HSPA1B//HYAL2//TLR4//TNF//WNT5A
GO:1902893	regulation_of_pri-miRNA_transcription_by_RNA_polymerase_II	Biological Process	11	35	1492	18342	6.64494e-05	0.0018318	4.17751	3.86369	0.00737265	BMP4//FOS//HIF1A//JUN//KLF5//NGFR//SMAD6//SOX9//STAT3//TGFB1//TGFB2
GO:0006644	phospholipid_metabolic_process	Biological Process	58	425	1492	18342	6.71218e-05	0.00184287	4.17314	1.67771	0.038874	ABHD4//ABHD6//AGPAT2//BPNT1//DBI//EREG//ETNK2//ETNPPL//FABP5//FDFT1//FGF18//FGF19//FGFR1//FGFR4//GDE1//GDPD1//GDPD3//HBEGF//IP6K2//IRS2//ISYNA1//KITLG//KLB//LCK//LIPH//LPCAT2//LPCAT3//LPCAT4//LPIN1//LPL//MFSD2A//MTMR2//MVK//NDUFAB1//NRG4//PGP//PHOSPHO1//PIGH//PIK3R3//PIP4K2A//PLA2G15//PLA2G3//PLA2G4A//PLPP1//PLPP3//PLPPR2//PNPLA6//PTPN13//SERINC2//SERINC5//SLC44A3//SMPD2//SMPDL3A//SNCA//SOCS1//SO…
GO:0045860	positive_regulation_of_protein_kinase_activity	Biological Process	72	560	1492	18342	6.80098e-05	0.00185975	4.16743	1.5806	0.0482574	ACSL1//ADORA1//ADRA2B//ADRB2//AFAP1L2//ANG//ARRB1//BDNF//BMP4//CCNB1//CCND2//CCND3//CD81//CDK5//CEMIP//CKS2//CLU//CRKL//CXCR4//CYR61//DAB2IP//DIRAS1//DUSP6//DUSP9//EDN1//EFNA5//EGR1//EMP2//EPHB3//EPHB4//EREG//FGF18//FGFR1//FGFR4//FZD10//FZD4//GPRC5B//HSP90AA1//HSPH1//IGF2//ILK//ITGA1//ITGB3//MADD//MALT1//MAP2K3//MAP2K6//MAP3K10//MAP3K12//MAP3K8//MAPKAPK2//NEURL1//NKX3-1//PAK4//PAK6//PINK1//PRKAR2…
GO:0043299	leukocyte_degranulation	Biological Process	66	502	1492	18342	6.92995e-05	0.00188744	4.15927	1.61629	0.0442359	ACPP//AGPAT2//ALDOC//ATP6V0A1//ATP6V0C//ATP8A1//BST2//CAP1//CD14//CD58//CD63//CEACAM1//CMTM6//CRISPLD2//CTSD//CYSTM1//DGAT1//DOK3//DYNLL1//FABP5//GGH//GHDC//GLA//GLIPR1//GM2A//GMFG//GOLGA7//GSN//HSP90AA1//HSPA1A//HSPA1B//IDH1//IQGAP2//ITGAV//MCEMP1//METTL7A//MMP9//NEU1//NR4A3//OSTF1//PGAM1//PKM//PLA2G3//PLEKHO2//PRDX4//PRTN3//PSMA2//PSMD1//PSMD11//PSMD14//PSMD3//PTX3//RAB3A//RAB3D//RAB5C//SDCBP//…
GO:0071407	cellular_response_to_organic_cyclic_compound	Biological Process	67	513	1492	18342	7.501e-05	0.00203483	4.12488	1.60559	0.0449062	ABCC2//AKR1C3//ANXA1//APLP1//APP//AQP1//ATP1A1//ATP1A3//BMP4//CAV1//CCL2//CCNB1//CEBPA//CEBPB//CIB2//COL1A1//CYP1A1//CYP24A1//DDX58//DNAJA1//EDN1//EFNA5//EGR1//ERRFI1//FBXO32//FOXF1//FOXO1//GDAP1//HCN2//IFIT1//INSIG1//ITGA2//KDM1A//KLF5//MSN//MSX2//NCOA3//NFKBIA//NKX3-1//NR2F1//NR4A1//NR4A3//NR6A1//PAK4//PAQR5//PLPP1//PPARG//PPARGC1A//PPP1R9B//PTGS2//RAPGEF3//RARB//RBM14//RNF14//RORB//SLC9A1//SNC…
GO:0002283	neutrophil_activation_involved_in_immune_response	Biological Process	64	485	1492	18342	7.96439e-05	0.00215196	4.09885	1.62224	0.0428954	ACPP//AGPAT2//ALDOC//ATP6V0A1//ATP6V0C//ATP8A1//BST2//CAP1//CD14//CD58//CD63//CEACAM1//CMTM6//CRISPLD2//CTSD//CYSTM1//DGAT1//DOK3//DYNLL1//FABP5//GGH//GHDC//GLA//GLIPR1//GM2A//GMFG//GOLGA7//GSN//HSP90AA1//HSPA1A//HSPA1B//IDH1//IQGAP2//ITGAV//MCEMP1//METTL7A//MMP9//NEU1//OSTF1//PGAM1//PKM//PLEKHO2//PRDX4//PRTN3//PSMA2//PSMD1//PSMD11//PSMD14//PSMD3//PTX3//RAB3A//RAB3D//RAB5C//SDCBP//SERPINA1//SLC2A…
GO:0001913	T_cell_mediated_cytotoxicity	Biological Process	7	15	1492	18342	8.33498e-05	0.00223437	4.0791	5.737	0.00469169	EMP2//MICA//MICB//RAET1G//RAET1L//ULBP2//ULBP3
GO:0010248	establishment_or_maintenance_of_transmembrane_electrochemical_gradient	Biological Process	7	15	1492	18342	8.33498e-05	0.00223437	4.0791	5.737	0.00469169	ATP1A1//ATP1A3//ATP1B1//ATP1B2//ATP1B3//BAK1//FXYD2
GO:0060411	cardiac_septum_morphogenesis	Biological Process	16	68	1492	18342	8.57132e-05	0.00228871	4.06695	2.8926	0.0107239	ACVR1//BMP4//CYR61//ID2//MSX2//NOG//NRP2//RARB//RBM15//SMAD6//SOX4//TBX3//TGFB2//TGFBR3//WNT11//WNT5A
GO:0008203	cholesterol_metabolic_process	Biological Process	22	112	1492	18342	8.65141e-05	0.00230107	4.06291	2.41481	0.0147453	ABCG1//APOL2//APP//CEBPA//CES1//CYP11A1//CYP51A1//DHCR24//DHCR7//EBP//FDFT1//G6PD//HMGCR//INSIG1//LDLR//LIPE//MSMO1//MVK//NSDHL//SC5D//SOAT1//SQLE
GO:0032970	regulation_of_actin_filament-based_process	Biological Process	53	382	1492	18342	8.83895e-05	0.00234181	4.0536	1.70565	0.0355228	ABRACL//ADD3//AP1AR//ARHGAP40//ARHGDIB//ATP1A1//BST2//C15orf38-AP3S2//C15orf62//CARMIL1//CAV1//CCL26//CDC42EP2//CDC42EP4//CDC42EP5//CDK5//CFL1//CTSV//DIXDC1//EDN1//EFNA5//F2RL1//FES//FSCN1//FZD10//GMFG//GSN//ILK//IQGAP2//LRP1//MTPN//PTGER4//RANGRF//RAPGEF3//RHOB//RHOC//RHOU//RHOV//RND1//RND2//S1PR1//SH3PXD2B//SHANK3//SLC9A1//STC1//TGFB1//TMOD1//TMOD2//TMOD3//TMSB4X//VASP//WASF1//WNT11
GO:0002576	platelet_degranulation	Biological Process	24	128	1492	18342	9.14031e-05	0.00241226	4.03904	2.30504	0.0160858	APP//CD63//CD9//CLU//ECM1//IGF2//ITGB3//LHFPL2//MAGED2//RARRES2//SERPINA1//SPARC//SRGN//STXBP1//SYTL4//TEX264//TGFB1//TGFB2//TIMP1//TIMP3//TMSB4X//TOR4A//VEGFA//VEGFC
GO:0043524	negative_regulation_of_neuron_apoptotic_process	Biological Process	25	136	1492	18342	9.20567e-05	0.00242013	4.03594	2.25985	0.016756	ARRB1//ARRB2//BDNF//CCL2//CEBPB//CNTFR//CPEB4//CRLF1//EN1//EN2//HIF1A//HMOX1//ILK//JUN//LIG4//LRP1//MAP3K12//NR4A3//PINK1//PPARGC1A//PRKCG//RETREG1//SNCA//STXBP1//UNC5B
GO:0071248	cellular_response_to_metal_ion	Biological Process	30	177	1492	18342	9.27169e-05	0.00242811	4.03284	2.08366	0.0201072	AKR1C3//AQP1//ATP7A//BMP6//CACNA1H//CCNB1//CEBPA//CHUK//CYP1A1//EDN1//FOS//FOSB//GSN//HMOX1//ID2//JUN//KCNK3//LIG4//MCOLN1//MMP9//MT1B//MT1F//MT1X//PPARGC1A//PTGS2//RASGRP2//SNCA//TIGAR//TUBG1//WNT5A
GO:0046885	regulation_of_hormone_biosynthetic_process	Biological Process	9	25	1492	18342	9.36477e-05	0.00244309	4.0285	4.42568	0.00603217	AKR1C3//ATP1A1//BMP6//EGR1//HIF1A//POR//PPARGC1A//TNF//VDR
GO:0033273	response_to_vitamin	Biological Process	19	90	1492	18342	9.44704e-05	0.00245379	4.0247	2.59531	0.0127346	AQP3//CDKN2D//COL1A1//CYP1A1//CYP24A1//CYP26B1//FKBP1B//GDAP1//GSN//ITGA2//MTHFR//PPARG//PTGS2//SPARC//SPP1//STC1//TGFB1//VDR//ZNF354A
GO:0032526	response_to_retinoic_acid	Biological Process	21	105	1492	18342	9.47783e-05	0.00245379	4.02329	2.45871	0.0140751	AQP1//AQP3//BMP6//CDKN2D//COL1A1//CYP26B1//FZD10//FZD4//FZD7//GDAP1//GJB3//MICB//PPARG//RARB//RORB//SOX9//TESC//WNT11//WNT5A//WNT6//WNT7B
GO:0019058	viral_life_cycle	Biological Process	29	169	1492	18342	9.61612e-05	0.00248016	4.017	2.10955	0.019437	ATG5//CAV1//CCL2//CD81//CXCR4//EFNB2//FURIN//HSPA1A//HSPA1B//HYAL2//ITGA2//ITGA5//ITGAV//ITGB3//KPNA3//LAMP3//LDLR//MVB12A//NECTIN1//NECTIN2//NECTIN4//PC//RAB29//SLC52A2//UBB//VCP//VPS37D//XPO1//XPR1
GO:0010035	response_to_inorganic_substance	Biological Process	66	508	1492	18342	9.89852e-05	0.00253384	4.00443	1.5972	0.0442359	ABCC2//AKR1B1//AKR1C3//ANXA1//ANXA11//APP//AQP1//AQP3//ATP7A//BAK1//BMP6//BSG//CACNA1G//CACNA1H//CAV1//CCNB1//CD14//CD9//CEBPA//CHUK//COL1A1//CSF2//CYB5A//CYP1A1//EDN1//EEF1A2//FKBP1B//FOS//FOSB//FOXO1//G6PD//GGH//GSN//HBA1//HIF1A//HMOX1//ID2//JUN//KCNK3//KCNMB4//KRT8//LDHA//LIG4//MAPT//MCOLN1//MMP9//MT-ND6//MT1B//MT1F//MT1X//NDRG1//NR4A3//PINK1//PPARGC1A//PRDX1//PTGS2//RASGRP2//RHOB//S100A16//SL…
GO:0030155	regulation_of_cell_adhesion	Biological Process	81	656	1492	18342	9.8987e-05	0.00253384	4.00442	1.51796	0.0542895	ADAM22//ADGRG1//ANXA1//AP1AR//ARG2//ARHGDIB//BCL10//BCL6//BMP4//CAMSAP3//CARMIL1//CAV1//CCL2//CD83//CD9//CEACAM1//CEBPB//COL1A1//CRKL//CXCL8//CYR61//CYTIP//DUSP10//EFNA5//EFNB1//EGR3//EMILIN2//EMP2//EPHB3//FADD//FBLN1//FBLN2//FES//FOXC2//FOXF1//FZD4//FZD7//GCNT2//GSN//HAVCR2//HLX//HSPH1//IGF2//IL7R//ILK//ITGA2//ITGA5//ITGAV//LCK//MAD2L2//MALT1//MAP3K8//MMP14//NINJ1//NR4A3//PELI1//PLPP3//RAC2//REL…
GO:0048589	developmental_growth	Biological Process	51	365	1492	18342	9.94996e-05	0.00253743	4.00218	1.71773	0.0341823	ANXA1//APP//ARID5B//AURKA//BDNF//BMP4//C3orf58//CCNB1//CDK5//COL21A1//COL6A2//DHCR7//EFNA5//EN1//ENO3//EREG//ETNK2//FOXC2//FZD7//GAS1//GSN//HOXA11//HSP90AA1//KAT2A//KDM5B//LGR6//LHX2//LRP4//MATN3//MMP13//MSX2//MTPN//NINJ1//NRP2//PKM//RARB//RDH10//S1PR1//SEMA7A//SHANK3//SOX15//SOX9//STC1//TAF8//TGFB1//TGFB2//TGFBR3//WASF1//WNT11//WNT5A//WNT7B
GO:1903362	regulation_of_cellular_protein_catabolic_process	Biological Process	37	238	1492	18342	0.000100776	0.00256038	3.99664	1.91118	0.0247989	AURKA//BCAP31//CAV1//CD81//CEBPA//CLU//DAB2IP//FURIN//HSP90AA1//HSPA1A//HSPA1B//LAMP3//LAPTM4B//LDLR//LRP1//MAP1A//MSN//MYLIP//NKD2//PDCL3//PINK1//PLK1//PLK2//PRKCG//PSMC4//PSMD14//RNF139//RNF14//RNF144B//RYBP//SDCBP//SOCS5//TRIB1//TRIB2//UBB//VCP//YOD1
GO:0050804	modulation_of_chemical_synaptic_transmission	Biological Process	50	356	1492	18342	0.000101771	0.00257605	3.99238	1.72662	0.0335121	ABHD6//ADORA1//ADRB2//APP//ARC//ARRB2//ASIC1//BDNF//CALB1//CALB2//CDC20//CDK5//DBN1//EDN1//GLUL//HAP1//JPH3//KAT2A//KCNMB4//MAP1A//MAPT//MTMR2//NEURL1//NLGN2//NPTN//NRGN//NTSR1//PINK1//PLK2//PPP1R9B//PTGS2//RAB3A//RGS14//RIMS3//RIMS4//SEPT5//SERPINE2//SHANK3//SLC1A3//SLC30A1//SNCA//SNCG//STX1A//STXBP1//SYNGR1//SYT12//SYT7//UNC13A//VGF//ZMYND8
GO:0002521	leukocyte_differentiation	Biological Process	45	310	1492	18342	0.000102664	0.00258903	3.98858	1.78455	0.0301609	ANXA1//APP//ATG5//ATP11C//ATP7A//BAK1//BCL6//BMP4//CD79B//CDH17//CEBPA//CSF2//DLL4//DOCK10//DOCK11//EFNA2//EFNA4//EGR1//F2RL1//FADD//FZD7//GATA2//ID2//IL18R1//IL31RA//IL7R//JMJD6//JUN//L3MBTL3//LCK//LFNG//LIG4//MAFB//MALT1//MMP9//PPARG//PRTN3//PTGER4//SOX4//STAT3//TGFB1//TNF//VEGFA//ZBTB7B//ZFP36L2
GO:0071300	cellular_response_to_retinoic_acid	Biological Process	16	69	1492	18342	0.000103265	0.00259458	3.98605	2.85068	0.0107239	AQP1//COL1A1//CYP26B1//FZD10//FZD4//FZD7//GJB3//PPARG//RARB//RORB//SOX9//TESC//WNT11//WNT5A//WNT6//WNT7B
GO:0044267	cellular_protein_metabolic_process	Biological Process	365	3787	1492	18342	0.000107307	0.00268624	3.96937	1.18488	0.244638	AARS2//ABCF1//ABHD17C//ABTB2//ACTR5//ACVR1//ADRB2//ADRM1//ALOX12B//AMN1//ANAPC11//ANXA1//AP2S1//APC//APP//ARID5B//ARNTL//ARRB1//ARRB2//ARTN//ASB6//ASPHD2//ATG4A//ATG5//ATP7A//ATXN7L3//AURKA//B3GLCT//B3GNT2//B3GNT7//B4GALT5//B4GAT1//BCL10//BMP4//BRMS1//BTG1//CALB1//CAMK1D//CAMK2G//CBLB//CCDC126//CCL2//CCNB1//CCNB3//CCND2//CCND3//CCNF//CCNG2//CDC20//CDC42EP5//CDK19//CDK5//CDK9//CDKL5//CFL1//CHUK//C…
GO:0032956	regulation_of_actin_cytoskeleton_organization	Biological Process	48	339	1492	18342	0.000113886	0.00283	3.94353	1.74068	0.0321716	ADD3//AP1AR//ARHGAP40//ARHGDIB//BST2//C15orf38-AP3S2//C15orf62//CARMIL1//CCL26//CDC42EP2//CDC42EP4//CDC42EP5//CDK5//CFL1//CTSV//DIXDC1//EDN1//EFNA5//F2RL1//FES//FSCN1//FZD10//GMFG//GSN//ILK//IQGAP2//LRP1//MTPN//PTGER4//RAPGEF3//RHOB//RHOC//RHOU//RHOV//RND1//RND2//S1PR1//SH3PXD2B//SHANK3//SLC9A1//TGFB1//TMOD1//TMOD2//TMOD3//TMSB4X//VASP//WASF1//WNT11
GO:0045540	regulation_of_cholesterol_biosynthetic_process	Biological Process	12	43	1492	18342	0.000114019	0.00283	3.94302	3.43076	0.0080429	ABCG1//CYP51A1//DHCR7//FASN//FDFT1//HMGCR//MVK//NFYA//POR//SC5D//SCD//SQLE
GO:0001936	regulation_of_endothelial_cell_proliferation	Biological Process	30	179	1492	18342	0.000114297	0.00283	3.94196	2.06037	0.0201072	ANG//BMP4//BMP6//CAV1//CCL2//CCL26//DLL4//ECM1//EGFL7//EGR3//FGF18//FGFBP1//FGFR1//GATA2//HIF1A//HMOX1//ITGB3//JUN//NGFR//NR4A1//NRP2//PDCL3//PGF//PPARG//SPARC//STAT3//TNF//VEGFA//VEGFC//WNT5A
GO:0007155	cell_adhesion	Biological Process	104	894	1492	18342	0.000118811	0.00292862	3.92514	1.43012	0.0697051	ACVR1//ADAM22//ADGRG1//ADGRL1//ANXA1//APC//APLP1//APP//ARHGAP5//ATP1B1//ATP1B2//BCAR1//CAMSAP3//CCL2//CD58//CD63//CD9//CDH17//CDH24//CDH5//CDK5//CDON//CEACAM1//CLDN23//CNN3//COL15A1//COL3A1//COL5A3//COL6A2//COL8A2//CUZD1//CYR61//EFNB1//EFNB2//EGFL7//ELMO2//EMILIN2//EMP2//EPDR1//EPHB3//EPHB4//ESAM//FAT1//FES//FOXF1//FZD4//FZD7//GNE//GP1BB//HAPLN3//HSPB1//ILK//ITGA1//ITGA2//ITGA5//ITGA7//ITGAV//ITG…
GO:0001763	morphogenesis_of_a_branching_structure	Biological Process	29	171	1492	18342	0.00011914	0.00292862	3.92394	2.08487	0.019437	ACVR1//BMP4//COL4A1//DLL4//DLX2//EDN1//FGFR1//FOXC2//FOXF1//HOXA11//HOXB13//ILK//KDM5B//MMP14//MSX2//NKX3-1//NOG//PGF//PRDM1//RBM15//RDH10//SOX9//TBX3//TGFB1//TGM2//VDR//VEGFA//WNT5A//WNT6
GO:0048545	response_to_steroid_hormone	Biological Process	47	331	1492	18342	0.000124755	0.0030556	3.90394	1.74561	0.0315013	ABCC2//AKR1C3//ANXA1//AQP1//ATP1A1//ATP1A3//BMP4//BMP6//CAV1//COL1A1//CTSV//DNAJA1//EDN1//ERRFI1//FBXO32//FOS//FOSB//FOXO1//IDH1//LOX//NCOA3//NKX3-1//NR2F1//NR4A1//NR4A3//NR6A1//PAPPA//PAQR5//PLPP1//PPARG//PPARGC1A//PTGER2//PTGS2//RARB//RBM14//RNF14//RORB//SPARC//SPP1//STC1//TGFB1//TGFB2//THRA//TNF//VDR//WNT7B//ZFP36L2
GO:0002446	neutrophil_mediated_immunity	Biological Process	64	493	1492	18342	0.000128365	0.00313276	3.89155	1.59592	0.0428954	ACPP//AGPAT2//ALDOC//ATP6V0A1//ATP6V0C//ATP8A1//BST2//CAP1//CD14//CD58//CD63//CEACAM1//CMTM6//CRISPLD2//CTSD//CYSTM1//DGAT1//DOK3//DYNLL1//FABP5//GGH//GHDC//GLA//GLIPR1//GM2A//GMFG//GOLGA7//GSN//HSP90AA1//HSPA1A//HSPA1B//IDH1//IQGAP2//ITGAV//MCEMP1//METTL7A//MMP9//NEU1//OSTF1//PGAM1//PKM//PLEKHO2//PRDX4//PRTN3//PSMA2//PSMD1//PSMD11//PSMD14//PSMD3//PTX3//RAB3A//RAB3D//RAB5C//SDCBP//SERPINA1//SLC2A…
GO:0001704	formation_of_primary_germ_layer	Biological Process	22	115	1492	18342	0.000130036	0.00316221	3.88593	2.35181	0.0147453	ACVR1//BMP4//EXT2//FOXC2//FOXF1//HOXA11//HSBP1//ITGA2//ITGA5//ITGA7//ITGAV//ITGB3//MMP14//MMP15//MMP2//MMP9//NOG//NR4A3//SNAI1//TRIM15//WNT11//WNT5A
GO:0050806	positive_regulation_of_synaptic_transmission	Biological Process	25	139	1492	18342	0.00013232	0.00320628	3.87838	2.21107	0.016756	ADORA1//ADRB2//APP//ARC//ARRB2//GLUL//HAP1//NLGN2//NPTN//NRGN//NTSR1//PINK1//PLK2//PTGS2//RGS14//RIMS3//RIMS4//SERPINE2//SHANK3//SLC1A3//SNCA//STX1A//STXBP1//SYT12//UNC13A
GO:0016125	sterol_metabolic_process	Biological Process	24	131	1492	18342	0.000133102	0.00320895	3.87582	2.25226	0.0160858	ABCG1//APOL2//APP//CEBPA//CES1//CYP11A1//CYP26B1//CYP51A1//DHCR24//DHCR7//EBP//FDFT1//G6PD//HMGCR//INSIG1//LDLR//LIPA//LIPE//MSMO1//MVK//NSDHL//SC5D//SOAT1//SQLE
GO:0031396	regulation_of_protein_ubiquitination	Biological Process	31	189	1492	18342	0.000133372	0.00320895	3.87493	2.0164	0.0207775	ADRB2//ARRB1//ARRB2//ATG5//BCL10//CAV1//CDC20//CDK5//CDK9//CRY1//DNAJA1//FBXO2//HSP90AA1//HSPA1A//HSPA1B//KDM1A//MAD2L2//MALT1//NDFIP2//PELI1//PINK1//PLK1//PRKCG//RASD2//RASSF5//RNF139//SOX4//UBB//UBE2C//UBE2D1//UBE2S
GO:0050679	positive_regulation_of_epithelial_cell_proliferation	Biological Process	32	198	1492	18342	0.000139169	0.00333662	3.85646	1.98684	0.0214477	ANG//ATP7A//BMP4//BMP6//CCL26//ECM1//EGFL7//EGR3//FGFBP1//FGFR1//FZD7//GATA2//GLUL//HIF1A//HMOX1//HTRA1//ITGB3//JUN//KDM5B//NOG//NR4A1//NR4A3//NRP2//PDCL3//PGF//SOX9//STAT3//TGFB1//VEGFA//VEGFC//WNT5A//ZNF703
GO:0008610	lipid_biosynthetic_process	Biological Process	74	593	1492	18342	0.000140716	0.00336189	3.85166	1.5341	0.0495979	ACOT7//ACSL1//ACSS2//AGPAT2//AKR1B1//AKR1C3//ALOX12B//ANG//B4GALNT1//CACNA1H//CES1//CYP11A1//CYP1A1//CYP51A1//DGAT1//DHCR24//DHCR7//DHRS9//EBP//EDN1//ELOVL3//ETNK2//ETNPPL//FABP5//FASN//FDFT1//FGF18//FGF19//FGFR1//FGFR4//G6PD//GSTM4//HMGCR//HPGD//HSD17B11//INSIG1//IRS2//ISYNA1//KLB//LIPH//LPCAT2//LPCAT3//LPCAT4//LPIN1//LPL//MFSD2A//MSMO1//MTMR2//MVK//NDUFAB1//NSDHL//PHOSPHO1//PIGH//PIK3R3//PIP4K2…
GO:0061180	mammary_gland_epithelium_development	Biological Process	14	57	1492	18342	0.000143422	0.00341456	3.84338	3.01947	0.00938338	CEBPB//FOXF1//HIF1A//ID2//KDM5B//MSX1//MSX2//NTN1//TBX3//TGFB1//VDR//WNT5A//WNT7B//ZNF703
GO:0001837	epithelial_to_mesenchymal_transition	Biological Process	16	71	1492	18342	0.000147999	0.00349905	3.82974	2.77038	0.0107239	BMP4//FAM83D//FOXF2//HIF1A//MSX1//MSX2//NOG//OLFM1//RFLNB//SNAI1//SOX9//TGFB1//TGFB2//TGFBR3//WNT11//WNT5A
GO:0003151	outflow_tract_morphogenesis	Biological Process	16	71	1492	18342	0.000147999	0.00349905	3.82974	2.77038	0.0107239	ACVR1//BMP4//HIF1A//ILK//JUN//MSX2//NOG//NRP2//RARB//SMAD6//TBX3//TGFB2//TGFBR3//VEGFA//WNT11//WNT5A
GO:0045746	negative_regulation_of_Notch_signaling_pathway	Biological Process	11	38	1492	18342	0.00015268	0.00358482	3.81622	3.55866	0.00737265	ARRB1//BCL6//DLL4//DLX2//EGFL7//GATA2//LFNG//MMP14//NEURL1//NFKBIA//NOTCH3
GO:0071276	cellular_response_to_cadmium_ion	Biological Process	11	38	1492	18342	0.00015268	0.00358482	3.81622	3.55866	0.00737265	AKR1C3//ATP7A//CHUK//FOS//GSN//HMOX1//JUN//MMP9//MT1B//MT1F//MT1X
GO:0045444	fat_cell_differentiation	Biological Process	20	101	1492	18342	0.000158894	0.00371789	3.79889	2.43437	0.0134048	ADRB2//ARID5B//ARL6//BBS9//CEBPA//CEBPB//FFAR4//FOXO1//GRK5//INHBB//NR4A1//NR4A3//OSBPL11//PID1//PPARG//PPARGC1A//PTGS2//RGS2//SMAD6//TMEM120A
GO:0044597	daunorubicin_metabolic_process	Biological Process	5	8	1492	18342	0.00016075	0.00373567	3.79385	7.68348	0.00335121	AKR1B1//AKR1B10//AKR1C1//AKR1C2//AKR1C3
GO:0044598	doxorubicin_metabolic_process	Biological Process	5	8	1492	18342	0.00016075	0.00373567	3.79385	7.68348	0.00335121	AKR1B1//AKR1B10//AKR1C1//AKR1C2//AKR1C3
GO:2000377	regulation_of_reactive_oxygen_species_metabolic_process	Biological Process	29	174	1492	18342	0.000162871	0.00377207	3.78816	2.04893	0.019437	AKR1C3//ARG2//ATG5//CAV1//CLU//DDAH1//DDAH2//EDN1//F2RL1//FOXO1//G6PD//GLA//HIF1A//HSP90AA1//MAPT//PDK3//PID1//PINK1//PTGS2//PTX3//RAC2//SNCA//STAT3//STK17A//TGFB1//TIGAR//TLR4//TNF//ZNF205
GO:0016310	phosphorylation	Biological Process	144	1325	1492	18342	0.000167385	0.00386348	3.77628	1.33606	0.0965147	ACVR1//AK1//ALDOC//APP//ARTN//AURKA//BMP4//BPNT1//CAMK1D//CAMK2G//CCL2//CCNB1//CCNB3//CCND2//CCND3//CCNF//CCNG2//CDC42EP5//CDK19//CDK5//CDK9//CDKL5//CFL1//CHUK//CKB//COASY//COX6A1//CRKL//CRY1//CSF2//DAB2IP//DGKZ//DUSP6//DUSP9//DYRK3//EFNA3//EFNA4//EFNB1//EFNB2//ENO3//EPHB3//EPHB4//EREG//ETNK2//FASTKD5//FES//FGF18//FGF19//FGFR1//FGFR1OP2//FGFR4//FYB1//GMFG//GNE//GNPTAB//GRK5//HBEGF//HCST//HK1//HMG…
GO:0010038	response_to_metal_ion	Biological Process	49	354	1492	18342	0.000169854	0.00390721	3.76993	1.70165	0.0328418	ABCC2//AKR1C3//ANXA11//APP//AQP1//AQP3//ATP7A//BMP6//BSG//CACNA1G//CACNA1H//CAV1//CCNB1//CD14//CEBPA//CHUK//CYB5A//CYP1A1//EDN1//FOS//FOSB//G6PD//GGH//GSN//HIF1A//HMOX1//ID2//JUN//KCNK3//KCNMB4//LIG4//MAPT//MCOLN1//MMP9//MT1B//MT1F//MT1X//NDRG1//PPARGC1A//PTGS2//RASGRP2//S100A16//SLC30A1//SNCA//SPARC//TFF1//TIGAR//TUBG1//WNT5A
GO:0046718	viral_entry_into_host_cell	Biological Process	19	94	1492	18342	0.00017343	0.00397604	3.76088	2.48487	0.0127346	CAV1//CD81//CXCR4//EFNB2//HSPA1A//HSPA1B//HYAL2//ITGA2//ITGA5//ITGAV//ITGB3//KPNA3//LAMP3//LDLR//NECTIN1//NECTIN2//NECTIN4//SLC52A2//XPR1
GO:0032868	response_to_insulin	Biological Process	34	218	1492	18342	0.000177524	0.00405461	3.75074	1.91735	0.0227882	APC//ATP6V0A1//ATP6V0B//ATP6V0C//ATP6V0D1//ATP6V0E1//ATP6V1A//BCAR1//CEACAM1//CPEB2//CRY1//EGR1//ERRFI1//FOXC2//FOXO1//FOXO6//GAL//GGH//IGF2//INHBB//IRS2//LPIN1//PDK4//PIK3R3//PKM//PPARG//SESN3//SH2B2//SLC9A1//SORBS1//SORT1//TBC1D4//VGF//ZBTB7B
GO:0040007	growth	Biological Process	52	383	1492	18342	0.000178048	0.00405461	3.74946	1.6691	0.0348525	ANXA1//APP//ARID5B//AURKA//BDNF//BMP4//C3orf58//CCNB1//CDK5//COL21A1//COL6A2//DHCR7//EFNA5//EN1//ENO3//EREG//ETNK2//FOXC2//FZD7//GAS1//GSN//HOXA11//HSP90AA1//KAT2A//KDM5B//LGR6//LHX2//LRP4//MATN3//MMP13//MSX2//MTPN//NINJ1//NRP2//PKM//RARB//RDH10//S1PR1//SEMA7A//SHANK3//SOX15//SOX9//STC1//TAF8//TGFB1//TGFB2//TGFBR3//VEGFA//WASF1//WNT11//WNT5A//WNT7B
GO:0006955	immune_response	Biological Process	189	1818	1492	18342	0.000186018	0.00422198	3.73045	1.27804	0.126676	ACPP//AGPAT2//ALDOC//ANXA1//APOBEC3C//APP//ARG2//ATP6V0A1//ATP6V0C//ATP7A//ATP8A1//BCL10//BCL6//BMP6//BST2//C4BPA//CAMK2G//CAP1//CCL2//CCL26//CCRL2//CD14//CD58//CD63//CD7//CD70//CD79B//CD83//CDC42EP2//CDC42EP4//CDH17//CEACAM1//CEBPB//CHUK//CLU//CMTM6//CRISPLD2//CSF2//CTSD//CTSL//CXCL14//CXCL8//CXCR4//CYSTM1//DAB2IP//DDX58//DEFB1//DGAT1//DOCK10//DOCK11//DOK3//DYNLL1//EDN1//EGR1//EMP2//ENDOU//F12//…
GO:0050921	positive_regulation_of_chemotaxis	Biological Process	24	134	1492	18342	0.000190916	0.00431875	3.71916	2.20183	0.0160858	ARTN//CAMK1D//CCL26//CREB3//CXCL14//CXCL8//EDN1//F2RL1//FGF18//FGFR1//GPSM3//HSPB1//ITGA2//PGF//RAC2//RARRES2//S100A14//S1PR1//TGFB1//TMEM102//TMSB4X//VEGFA//VEGFC//WNT5A
GO:0043603	cellular_amide_metabolic_process	Biological Process	448	4783	1492	18342	0.000192747	0.00434574	3.71501	1.15148	0.300268	AARS2//ABCC2//ABCF1//ABCG1//ABHD17C//ABTB2//ACOT7//ACSL1//ACSS2//ACTR5//ACVR1//ADAM22//ADAMTS1//ADAMTS15//ADAMTS4//ADAMTS5//ADRB2//ADRM1//ALOX12B//AMN1//ANAPC11//ANXA1//AP2S1//APC//APOL2//APP//ARG2//ARID5B//ARNTL//ARRB1//ARRB2//ARTN//ASB6//ASPHD2//ATG4A//ATG5//ATP7A//ATXN7L3//AURKA//B3GLCT//B3GNT2//B3GNT7//B4GALNT1//B4GALT5//B4GAT1//BAK1//BCL10//BMP4//BRMS1//BTD//BTG1//C4BPA//CALB1//CAMK1D//CAMK2…
GO:0060412	ventricular_septum_morphogenesis	Biological Process	11	39	1492	18342	0.000197165	0.0044161	3.70517	3.46742	0.00737265	ACVR1//BMP4//ID2//NOG//RBM15//SOX4//TBX3//TGFB2//TGFBR3//WNT11//WNT5A
GO:2000273	positive_regulation_of_signaling_receptor_activity	Biological Process	11	39	1492	18342	0.000197165	0.0044161	3.70517	3.46742	0.00737265	ADORA1//ADRA2B//ADRB2//ARC//CDK5//EFNA5//EREG//NCOA3//NEURL1//PINK1//SHANK3
GO:0048771	tissue_remodeling	Biological Process	19	95	1492	18342	0.000200515	0.00447641	3.69785	2.45871	0.0127346	ADRB2//ANXA1//ATG5//ATP7A//BAK1//CAV1//DLL4//EFNA2//EFNA4//ELF3//FOXC2//HIF1A//LIPA//MMP14//RAB3D//RAC2//TGFB1//TGM2//TIMP1
GO:0010041	response_to_iron(III)_ion	Biological Process	4	5	1492	18342	0.000203941	0.00453802	3.6905	9.83485	0.00268097	ATP7A//CCNB1//CYP1A1//G6PD
GO:0044089	positive_regulation_of_cellular_component_biogenesis	Biological Process	65	511	1492	18342	0.000205032	0.00454743	3.68818	1.56376	0.0435657	ADGRB2//ADGRL1//APC//ATP7A//BDNF//BMF//C15orf62//CARMIL1//CAV1//CCL26//CDC42EP2//CDC42EP4//CDC42EP5//CDH17//CLU//CSF2//DOCK11//EDN1//EFNA5//EPHB3//F2RL1//FES//FSCN1//GPSM2//GSN//GTF2B//HAP1//HSP90AA1//HSPA1A//HSPA1B//IQGAP2//JUN//KCTD17//MAPT//MSN//NEURL1//NLGN2//PALM//PINK1//PIP4K2A//PLEKHM1//PPP2R5B//PSMC4//PSRC1//RAC2//RALA//RAPGEF3//RGS2//RHOC//SDCBP//SH3PXD2B//SLX1A//SLX4//SOX9//TGFB1//TLR4/…
GO:0046470	phosphatidylcholine_metabolic_process	Biological Process	16	73	1492	18342	0.000208745	0.00461476	3.68038	2.69448	0.0107239	ABHD4//DBI//FABP5//GDPD3//LPCAT2//LPCAT3//LPCAT4//LPIN1//MFSD2A//PHOSPHO1//PLA2G15//PLA2G3//PLA2G4A//PNPLA6//SLC44A3//STARD10
GO:0048858	cell_projection_morphogenesis	Biological Process	62	482	1492	18342	0.000209712	0.00462112	3.67838	1.58133	0.041555	APP//ARC//ARTN//ATP7A//AURKA//B3GNT2//B4GAT1//BDNF//CDK5//CRMP1//CXCR4//DAB2IP//DOCK10//DPYSL2//EFNA2//EFNA3//EFNA4//EFNA5//EFNB1//EFNB2//ENAH//EPHB3//HSP90AA1//ILK//IRS2//ISL2//ITGA1//KIF3A//LHX2//LRFN3//LRP4//MAP1A//MNX1//NECTIN1//NEFH//NEO1//NGFR//NOG//NPTX1//NR4A3//NRP2//NTN1//NYAP1//PLEKHO1//RAB3A//RAC2//SCN1B//SDC2//SEMA6C//SEMA7A//SGK1//SH3KBP1//SHANK3//SPON2//STXBP1//UBB//UNC5B//VASP//VEG…
GO:0043009	chordate_embryonic_development	Biological Process	70	561	1492	18342	0.00021157	0.00464704	3.67455	1.53396	0.0469169	ACVR1//ARNT2//ATP7A//AXIN2//BCL10//BHLHE41//BMP4//CCNB1//CEBPA//CEBPB//CFL1//COL1A1//CSF2//CYR61//DLX2//EDN1//ELF3//EN1//ETNK2//FAM212A//FGFR1//FOXC2//FOXF1//FUT8//GATA2//GJB3//HES2//HIF1A//HOXA11//HOXB4//HOXC11//HOXC6//HS6ST1//IGF2//KAT2A//KRT19//KRT8//LFNG//LHX2//LIG4//LUZP1//MEOX1//MMP14//MSX1//NEK2//NKX3-1//NKX3-2//NOG//NSDHL//POGLUT1//PRDM1//PSMC4//RALA//RARRES2//RDH10//SLC30A1//SNAI1//SOX4/…
GO:0060350	endochondral_bone_morphogenesis	Biological Process	15	66	1492	18342	0.000213743	0.00467967	3.67011	2.79399	0.0100536	AXIN2//BMP4//BMP6//COL1A1//COL21A1//COL6A2//FGF18//HOXA11//MATN3//MMP13//MMP14//PHOSPHO1//RARB//SOX9//STC1
GO:0032990	cell_part_morphogenesis	Biological Process	64	502	1492	18342	0.000214652	0.0046845	3.66827	1.56731	0.0428954	APP//ARC//ARTN//ATP7A//AURKA//B3GNT2//B4GAT1//BDNF//CDK5//CRMP1//CXCR4//DAB2IP//DOCK10//DPYSL2//EFNA2//EFNA3//EFNA4//EFNA5//EFNB1//EFNB2//ENAH//EPHB3//HSP90AA1//ILK//IRS2//ISL2//ITGA1//KIF3A//LHX2//LRFN3//LRP4//MAP1A//MNX1//NECTIN1//NECTIN2//NEFH//NEO1//NGFR//NOG//NPTX1//NR4A3//NRP2//NTN1//NYAP1//PID1//PLEKHO1//RAB3A//RAC2//SCN1B//SDC2//SEMA6C//SEMA7A//SGK1//SH3KBP1//SHANK3//SPON2//STXBP1//UBB//U…
GO:0006814	sodium_ion_transport	Biological Process	31	194	1492	18342	0.000216315	0.00470571	3.66491	1.96444	0.0207775	ASIC1//ATP1A1//ATP1A3//ATP1B1//ATP1B2//ATP1B3//CACNA1G//CACNA1H//CNNM4//FXYD1//FXYD2//HCN2//MAGED2//SCN1B//SGK1//SHROOM2//SLC12A2//SLC1A1//SLC1A3//SLC38A2//SLC38A4//SLC4A11//SLC4A2//SLC5A3//SLC6A12//SLC9A1//SLC9A2//SLC9A3R1//SLC9A5//SLC9A9//SLC9B2
GO:0045834	positive_regulation_of_lipid_metabolic_process	Biological Process	23	127	1492	18342	0.000217301	0.00470812	3.66294	2.22639	0.0154155	AADAC//ABCG1//ABHD6//ADORA1//ANXA1//BMP6//CD81//CYR61//EEF1A2//IRS2//LDLR//NR4A3//POR//PPARG//PPARGC1A//PTGS2//SIRT4//SLC45A3//SMPD2//SORBS1//TGFB1//TNF//VAV3
GO:1902307	positive_regulation_of_sodium_ion_transmembrane_transport	Biological Process	7	17	1492	18342	0.000217808	0.00470812	3.66193	5.06206	0.00469169	ATP1B1//ATP1B2//ATP1B3//FXYD1//GLRX//SLC9A1//TESC
GO:0080135	regulation_of_cellular_response_to_stress	Biological Process	80	662	1492	18342	0.000219491	0.00472947	3.65858	1.48563	0.0536193	APP//ARG2//ARNTL//AXIN2//BAG3//BAK1//BCAP31//BCL2L12//BCL6//BDKRB2//CAV1//CDK9//CDKN2D//CHORDC1//CLU//CREB3//CREB3L1//CRY1//DAB2IP//DDAH1//DNAJA1//DNAJB1//DUSP10//DYRK3//EDN1//F2RL1//FANCB//FGF19//FKBP1B//FOXO1//FUT8//FZD10//FZD4//FZD7//HIF1A//HMGCR//HSBP1//HSP90AA1//HSPA1A//HSPA1B//HSPA1L//HSPB1//HSPB8//HSPH1//IER3//IER5//INSIG1//KDM1A//MAP3K10//MAP3K12//MAPK8IP1//MAPKAPK2//MAPT//MSX1//NKX3-1//N…
GO:0048568	embryonic_organ_development	Biological Process	56	425	1492	18342	0.000225577	0.00484527	3.64671	1.61986	0.0375335	ACVR1//BMP4//CEBPA//CEBPB//CSF2//CXCL8//CYR61//DLX2//EDN1//EN1//EN2//FGFR1//FOXC2//FOXF1//GATA2//GTPBP3//HIF1A//HLX//HMX2//HMX3//HOXA11//HOXB4//HOXC11//HS6ST1//ID2//IGF2//INSIG1//KITLG//KRT19//KRT8//MAFB//MFAP2//MMP14//MSX1//NES//NKX3-2//NOG//NR4A3//NSDHL//NTN1//PRDM1//RARB//RARRES2//RDH10//SLC9A3R1//SNAI1//SOX9//TBX3//TGFB1//TGFB2//TNF//VEGFA//WHRN//WNT11//WNT5A//WNT7B
GO:0060348	bone_development	Biological Process	30	186	1492	18342	0.000229773	0.00491313	3.6387	1.98283	0.0201072	AXIN2//BMP4//BMP6//COL1A1//COL21A1//COL6A2//CYP26B1//FGF18//HOXA11//HOXB4//INSIG1//MATN3//MMP13//MMP14//MSX1//MSX2//P3H1//PHOSPHO1//PIP4K2A//PTGER4//RANBP3L//RARB//SH3PXD2B//SOX9//SPARC//STC1//SULF2//TGFB1//VKORC1//ZNF385A
GO:0032330	regulation_of_chondrocyte_differentiation	Biological Process	12	46	1492	18342	0.000230179	0.00491313	3.63793	3.20702	0.0080429	AXIN2//BMP4//BMP6//FGF18//HOXA11//NKX3-2//POR//PTHLH//RARB//RFLNB//SOX9//TRPS1
GO:0007611	learning_or_memory	Biological Process	37	248	1492	18342	0.000236023	0.00500938	3.62705	1.83412	0.0247989	APP//ARC//ASIC1//ATP8A1//BDNF//CALB1//CCND2//CDK5//CEBPB//CIC//EN1//FOS//FOXO6//GM2A//HIF1A//HMGCR//ITGA5//JPH3//JUN//KAT2A//LDLR//MAP1A//MAPT//NPTN//NRGN//NTAN1//NTSR1//PLK2//PRKAR2B//PRKCG//PTGS2//RGS14//SGK1//SHANK3//THRA//TMOD2//ZNF385A
GO:0060322	head_development	Biological Process	88	745	1492	18342	0.00023616	0.00500938	3.62679	1.45213	0.0589812	ADGRG1//APP//AQP1//ARID5B//ARL6//ARNT2//ARRB2//ATP6V0D1//ATP7A//BAG3//BAK1//BMP4//C16orf45//CD9//CDK5//CDON//CIC//CKB//COL1A1//COL3A1//COL4A1//CRISPLD2//CSRNP1//CXCR4//DAB2IP//DIXDC1//DLX2//DNAJB1//DPYSL2//DYNLL1//EFNA2//EN1//EN2//EPHB3//EPOR//FGFR1//FZD4//G6PD//GATA2//HAP1//HIF1A//HMX2//HMX3//ID2//INA//IRS2//KAT2A//KCNK3//KDM1A//LHX2//LRP1//MAFB//MFSD2A//MMP14//MMP2//MSX1//MTPN//NDRG2//NES//NEUR…
GO:0010817	regulation_of_hormone_levels	Biological Process	65	514	1492	18342	0.000241851	0.00511418	3.61645	1.55463	0.0435657	ABCC2//ADORA1//ADRA2B//AKR1B1//AKR1C1//AKR1C2//AKR1C3//ANXA1//ARNTL//ARRB1//ATP1A1//BMP6//CACNA1H//CAMK2G//CGA//CPE//CRABP2//CRY1//CYP11A1//CYP1A1//CYP26B1//DGAT1//DHCR7//DHRS9//DIO3//DYNLL1//EDN1//EFNA5//EGR1//ERO1B//FFAR4//FGFR1//FKBP1B//FURIN//FZD4//GAL//GLUL//HIF1A//HMGCR//HSD17B11//INHBB//IRS2//KDM5B//MAFA//NKX3-1//NLGN2//POR//PPARGC1A//RAPGEF3//RDH10//RDH11//SCPEP1//SDR16C5//SIRT4//SLC9B2//…
GO:0002685	regulation_of_leukocyte_migration	Biological Process	29	178	1492	18342	0.000243255	0.00512793	3.61394	2.00288	0.019437	ADORA1//ANXA1//APP//CAMK1D//CCL2//CREB3//CXCL14//CXCL8//ECM1//EDN1//F2RL1//FADD//GPSM3//HMOX1//IL1R1//ITGA2//MMP14//MSN//PGF//PTGER4//RAC2//RARRES2//S100A14//TGFB1//TMEM102//TNF//VEGFA//VEGFC//WNT5A
GO:0048812	neuron_projection_morphogenesis	Biological Process	61	475	1492	18342	0.000245653	0.00516251	3.60968	1.57875	0.0408847	APP//ARC//ARTN//ATP7A//AURKA//B3GNT2//B4GAT1//BDNF//CDK5//CRMP1//CXCR4//DAB2IP//DOCK10//DPYSL2//EFNA2//EFNA3//EFNA4//EFNA5//EFNB1//EFNB2//ENAH//EPHB3//HSP90AA1//ILK//IRS2//ISL2//ITGA1//KIF3A//LHX2//LRFN3//LRP4//MAP1A//MNX1//NECTIN1//NEFH//NEO1//NGFR//NOG//NPTX1//NR4A3//NRP2//NTN1//NYAP1//RAB3A//RAC2//SCN1B//SDC2//SEMA6C//SEMA7A//SGK1//SH3KBP1//SHANK3//SPON2//STXBP1//UBB//UNC5B//VASP//VEGFA//WASF1…
GO:0048010	vascular_endothelial_growth_factor_receptor_signaling_pathway	Biological Process	15	67	1492	18342	0.000254968	0.00534177	3.59351	2.75229	0.0100536	BCAR1//DAB2IP//ELMO2//FOXC2//HSP90AA1//HSPB1//ITGAV//ITGB3//MAPKAPK2//NCF2//NRP2//PGF//VAV3//VEGFA//VEGFC
GO:0050730	regulation_of_peptidyl-tyrosine_phosphorylation	Biological Process	36	240	1492	18342	0.000255845	0.00534372	3.59202	1.84403	0.0241287	ADORA1//ADRA2B//AFAP1L2//APP//ARRB2//BDNF//CAV1//CBLB//CD81//CRLF1//CSF2//EFNA5//EHD4//EREG//ERRFI1//GPRC5B//HBEGF//HSPH1//HYAL2//IGF2//IL31RA//ITGA5//ITGB3//LRP4//NEURL1//PDCL3//PPP2R5B//SOCS1//SOCS5//SRCIN1//STAT3//TGFB1//TMEM102//UNC119//VEGFA//VEGFC
GO:0032350	regulation_of_hormone_metabolic_process	Biological Process	10	34	1492	18342	0.000262777	0.00547172	3.58041	3.61575	0.00670241	AKR1C3//ATP1A1//BMP6//EGR1//GAL//HIF1A//POR//PPARGC1A//TNF//VDR
GO:0061138	morphogenesis_of_a_branching_epithelium	Biological Process	27	162	1492	18342	0.000269429	0.00559313	3.56955	2.04893	0.0180965	ACVR1//BMP4//COL4A1//DLL4//EDN1//FGFR1//FOXC2//FOXF1//HOXA11//HOXB13//ILK//KDM5B//MMP14//MSX2//NKX3-1//NOG//PGF//RBM15//RDH10//SOX9//TBX3//TGFB1//TGM2//VDR//VEGFA//WNT5A//WNT6
GO:0060349	bone_morphogenesis	Biological Process	20	105	1492	18342	0.00027439	0.00567878	3.56163	2.34163	0.0134048	AXIN2//BMP4//BMP6//COL1A1//COL21A1//COL6A2//CYP26B1//FGF18//HOXA11//INSIG1//MATN3//MMP13//MMP14//MSX1//MSX2//PHOSPHO1//RARB//SOX9//STC1//TGFB1
GO:0003231	cardiac_ventricle_development	Biological Process	22	121	1492	18342	0.000278496	0.0057463	3.55518	2.23519	0.0147453	ACVR1//BMP4//CPE//CYR61//DLL4//FOXC2//FOXF1//HIF1A//ID2//LTBP1//LUZP1//NOG//PRDM1//RBM15//SMAD6//SOX4//TBX3//TGFB1//TGFB2//TGFBR3//WNT11//WNT5A
GO:0048660	regulation_of_smooth_muscle_cell_proliferation	Biological Process	26	154	1492	18342	0.000281561	0.00579199	3.55043	2.07554	0.0174263	AKR1B1//ANG//BMP4//EDN1//EREG//HBEGF//HMGCR//HMOX1//HPGD//ID2//ILK//ITGA2//JUN//MMP2//MMP9//NDRG2//NOTCH3//NPR3//NR4A3//PPARG//PPARGC1A//PTGS2//S1PR1//TGM2//TNF//TRIB1
GO:0045599	negative_regulation_of_fat_cell_differentiation	Biological Process	12	47	1492	18342	0.000286467	0.00587517	3.54292	3.13878	0.0080429	ARNTL//C1QL4//FOXO1//GATA2//INSIG1//MSX2//SORT1//TGFB1//TNF//TRIB2//WNT5A//ZFP36L2
GO:0071456	cellular_response_to_hypoxia	Biological Process	25	146	1492	18342	0.00029258	0.00598251	3.53376	2.10506	0.016756	AQP1//AQP3//ATP7A//CCNB1//CPEB2//EDN1//EGLN3//EGR1//HIF1A//HMOX1//KCNK3//NDRG1//NKX3-1//PDK3//PINK1//PPARGC1A//PTGS2//SIRT4//SLC29A1//SLC9A1//STC1//TIGAR//UBB//VASN//VEGFA
GO:0031274	positive_regulation_of_pseudopodium_assembly	Biological Process	6	13	1492	18342	0.000298272	0.00604692	3.52539	5.67395	0.00402145	APC//C15orf62//CDC42EP2//CDC42EP4//CDC42EP5//F2RL1
GO:0055064	chloride_ion_homeostasis	Biological Process	6	13	1492	18342	0.000298272	0.00604692	3.52539	5.67395	0.00402145	ABCC2//CA12//CKB//SLC12A2//SLC12A6//SLC12A8
GO:2001242	regulation_of_intrinsic_apoptotic_signaling_pathway	Biological Process	27	163	1492	18342	0.000298394	0.00604692	3.52521	2.03636	0.0180965	BCAP31//BCL2L12//BDKRB2//BMF//CAV1//CDKN2D//CLU//CREB3//CREB3L1//DNAJA1//HIF1A//HSPA1A//HSPB1//HSPH1//KDM1A//LCK//MAPK8IP1//MMP9//MSX1//NKX3-1//PINK1//PLEKHF1//PTGS2//SLC9A3R1//SNAI1//UBB//ZNF385A
GO:0001503	ossification	Biological Process	37	251	1492	18342	0.00030049	0.00607132	3.52217	1.8122	0.0247989	AXIN2//BMP4//BMP6//COL1A1//CREB3L1//CYP24A1//CYR61//ECM1//EXT2//FASN//FGF18//FOXC2//IGF2//MINPP1//MMP13//MMP14//MMP2//MMP9//MSX2//NOG//OSTF1//PHOSPHO1//PTGS2//PTHLH//RRAS2//RRBP1//SEMA7A//SH3PXD2B//SNAI1//SORT1//SOX9//SPARC//SPP1//STC1//TGFB1//THRA//WNT11
GO:0099132	ATP_hydrolysis_coupled_cation_transmembrane_transport	Biological Process	15	68	1492	18342	0.00030287	0.00609349	3.51874	2.71182	0.0100536	ATP1A1//ATP1A3//ATP1B1//ATP1B2//ATP1B3//ATP2A3//ATP6V0A1//ATP6V0B//ATP6V0C//ATP6V0D1//ATP6V0E1//ATP6V1A//ATP7A//ATP8A1//FXYD2
GO:0009792	embryo_development_ending_in_birth_or_egg_hatching	Biological Process	71	578	1492	18342	0.000303861	0.00609349	3.51733	1.51011	0.0475871	ACVR1//ARNT2//ATP7A//AXIN2//BCL10//BHLHE41//BMP4//CAMSAP3//CCNB1//CEBPA//CEBPB//CFL1//COL1A1//CSF2//CYR61//DLX2//EDN1//ELF3//EN1//ETNK2//FAM212A//FGFR1//FOXC2//FOXF1//FUT8//GATA2//GJB3//HES2//HIF1A//HOXA11//HOXB4//HOXC11//HOXC6//HS6ST1//IGF2//KAT2A//KRT19//KRT8//LFNG//LHX2//LIG4//LUZP1//MEOX1//MMP14//MSX1//NEK2//NKX3-1//NKX3-2//NOG//NSDHL//POGLUT1//PRDM1//PSMC4//RALA//RARRES2//RDH10//SLC30A1//SNA…
GO:0090181	regulation_of_cholesterol_metabolic_process	Biological Process	13	54	1492	18342	0.000304272	0.00609349	3.51674	2.95956	0.00871314	ABCG1//CYP51A1//DHCR7//FASN//FDFT1//HMGCR//LDLR//MVK//NFYA//POR//SC5D//SCD//SQLE
GO:0048844	artery_morphogenesis	Biological Process	14	61	1492	18342	0.000308623	0.0061625	3.51057	2.82147	0.00938338	BMP4//COL3A1//DLL4//FOXC2//FOXF1//HPGD//LRP1//NOG//NOTCH3//PRDM1//SOX4//TGFB2//VEGFA//WNT11
GO:0036294	cellular_response_to_decreased_oxygen_levels	Biological Process	26	155	1492	18342	0.000312648	0.00617759	3.50494	2.06215	0.0174263	AQP1//AQP3//ATP7A//CCNB1//CPEB2//CPEB4//EDN1//EGLN3//EGR1//HIF1A//HMOX1//KCNK3//NDRG1//NKX3-1//PDK3//PINK1//PPARGC1A//PTGS2//SIRT4//SLC29A1//SLC9A1//STC1//TIGAR//UBB//VASN//VEGFA
GO:0019752	carboxylic_acid_metabolic_process	Biological Process	103	907	1492	18342	0.000312827	0.00617759	3.5047	1.39607	0.0690349	AARS2//ABCC2//ABCC5//ACOT7//ACSL1//ACSS2//ADIPOR2//AFMID//AHCYL2//AKR1C1//AKR1C2//AKR1C3//ALDOC//ALOX12B//ARG2//ATP7A//AZIN2//BSG//BTD//CEMIP//CES1//CKB//CRABP2//CREM//CYB5A//CYP1A1//CYP26B1//CYP2S1//DCXR//DDAH1//DDAH2//DHRS9//EDN1//EGLN3//ELOVL3//ENO3//ERO1B//FASN//GFPT2//GGH//GLS//GLUL//GNE//GSTM4//HIF1A//HK1//HPGD//HYAL2//IDH1//LDHA//LIPE//LPIN1//LPL//MAPKAPK2//ME1//MPC1//MSMO1//MTHFR//NDUFAB1…
GO:0034504	protein_localization_to_nucleus	Biological Process	28	172	1492	18342	0.000312842	0.00617759	3.50467	2.00128	0.0187668	AKR1C3//ARNTL//BCL6//BMP4//CBLB//CDK5//COL1A1//FYB1//GBP2//IPO13//KPNA2//KPNA3//MORC3//MSX1//NFKBIA//NXT2//PLK1//RANBP3L//SOX9//STAT3//SUN2//TAF8//TGFB1//TNF//TOR1AIP2//TRPS1//WRAP53//XPO1
GO:0071383	cellular_response_to_steroid_hormone_stimulus	Biological Process	31	198	1492	18342	0.000313008	0.00617759	3.50444	1.92475	0.0207775	ABCC2//AKR1C3//ANXA1//AQP1//ATP1A1//ATP1A3//BMP4//DNAJA1//EDN1//ERRFI1//FBXO32//FOXO1//NCOA3//NKX3-1//NR2F1//NR4A1//NR4A3//NR6A1//PAQR5//PLPP1//PPARG//PPARGC1A//RARB//RBM14//RNF14//RORB//STC1//TGFB1//THRA//VDR//ZFP36L2
GO:0006006	glucose_metabolic_process	Biological Process	21	114	1492	18342	0.000315505	0.00620889	3.50099	2.2646	0.0140751	ALDOC//CREM//CRY1//DCXR//ENO3//FABP5//G6PD//GALM//HK1//IGF2//IRS2//OAS1//OMA1//PC//PDK3//PDK4//PGAM1//PGM2L1//PKM//PPARGC1A//TNF
GO:0043254	regulation_of_protein_complex_assembly	Biological Process	59	460	1492	18342	0.000318365	0.00624712	3.49707	1.57678	0.0395442	ADD3//AP1AR//ARHGAP40//BMF//C15orf38-AP3S2//C15orf62//CAMSAP3//CARMIL1//CCL26//CDC42EP2//CDC42EP4//CDC42EP5//CDH17//CLU//CSF2//DAB2IP//FES//FSCN1//GMFG//GSN//GTF2B//HSP90AA1//HSPA1A//HSPA1B//INSIG1//IQGAP2//JUN//MAPT//MSN//MTPN//NBDY//PINK1//PPP2R5B//PREB//PSMC4//PSRC1//PTGER4//RANGRF//RGS2//RHOC//SAR1A//SMAD6//SNCA//STX1A//STXBP1//TGFB1//THRA//TLR4//TMC8//TMOD1//TMOD2//TMOD3//TMSB4X//TNF//TPPP//…
GO:0010638	positive_regulation_of_organelle_organization	Biological Process	72	590	1492	18342	0.000335198	0.00655852	3.4747	1.50023	0.0482574	ADRB2//ANAPC11//ANXA1//ARRB1//AURKA//BAK1//BCL6//BMF//C15orf62//CARMIL1//CCL26//CCNB1//CDC42EP2//CDC42EP4//CDC42EP5//CDK5//CDK9//CFL1//CSF2//DLGAP5//EDN1//EREG//ESPL1//F2RL1//FES//FSCN1//GPSM2//GSN//HAP1//HIF1A//HSPA1A//HSPA1B//HSPA1L//IGF2//IQGAP2//KAT2A//KCTD17//KDM1A//LIG4//MAPT//MMP9//MSN//MSX1//MSX2//NEK2//NES//PHF1//PINK1//PIP4K2A//PPARGC1A//PSRC1//RAC2//RANBP3L//RAPGEF3//RGS2//RHOU//SDCBP/…
GO:1903748	negative_regulation_of_establishment_of_protein_localization_to_mitochondrion	Biological Process	5	9	1492	18342	0.000337397	0.00658263	3.47186	6.82976	0.00335121	BAG3//DNAJA1//HSPH1//MAPT//SIRT4
GO:0017158	regulation_of_calcium_ion-dependent_exocytosis	Biological Process	16	76	1492	18342	0.000340056	0.00658348	3.46845	2.58812	0.0107239	C2CD4C//CACNA1G//CACNA1H//CDK5//RAB3A//RIMS3//RIMS4//SCAMP5//SEPT5//STX1A//STXBP1//SYT12//SYT7//SYTL2//SYTL4//TC2N
GO:0055075	potassium_ion_homeostasis	Biological Process	9	29	1492	18342	0.000340836	0.00658348	3.46745	3.81524	0.00603217	ATP1A1//ATP1A3//ATP1B1//ATP1B2//ATP1B3//KCNH2//SLC12A2//SLC12A6//SLC12A8
GO:0045862	positive_regulation_of_proteolysis	Biological Process	48	355	1492	18342	0.000341133	0.00658348	3.46708	1.66223	0.0321716	ADRM1//APP//ARRB1//AURKA//BAK1//BCAP31//BCL10//CAV1//CEBPA//CLU//CYR61//DAB2IP//EFNA3//EGLN3//F12//FADD//FBLN1//FGFR4//FURIN//GRAMD4//GSN//HSPA1A//HSPA1B//LCK//MAL//MAPT//MMP14//NGFR//NKD2//NKX3-1//PINK1//PLK1//PLK2//PPARG//PSMC4//PSMD14//RNF139//RNF14//RNF144B//SNCA//SOCS5//STAT3//TBC1D10A//TNF//TNFRSF1B//TRIB1//TRIB2//VCP
GO:0031145	anaphase-promoting_complex-dependent_catabolic_process	Biological Process	10	35	1492	18342	0.000341309	0.00658348	3.46685	3.51245	0.00670241	ANAPC11//AURKA//CCNB1//CDC20//PLK1//PTTG1//UBB//UBE2C//UBE2D1//UBE2S
GO:0002066	columnar|cuboidal_epithelial_cell_development	Biological Process	12	48	1492	18342	0.00035401	0.00679002	3.45098	3.07339	0.0080429	BMP4//BMP6//FGFR1//HIF1A//KLF5//NKX3-2//PRDM1//RARB//SLC9A3R1//TIGAR//WHRN//WNT5A
GO:0010718	positive_regulation_of_epithelial_to_mesenchymal_transition	Biological Process	12	48	1492	18342	0.00035401	0.00679002	3.45098	3.07339	0.0080429	ACVR1//AXIN2//BAMBI//BMP4//COL1A1//GCNT2//OLFM1//SDCBP//SNAI1//TGFB1//TGFB2//ZNF703
GO:0048332	mesoderm_morphogenesis	Biological Process	15	69	1492	18342	0.000358316	0.00681501	3.44573	2.67251	0.0100536	ACVR1//BMP4//EXT2//FOXC2//FOXF1//HOXA11//ITGA2//ITGB3//NOG//NR4A3//SNAI1//TBX3//TRIM15//WNT11//WNT5A
GO:0090662	ATP_hydrolysis_coupled_transmembrane_transport	Biological Process	15	69	1492	18342	0.000358316	0.00681501	3.44573	2.67251	0.0100536	ATP1A1//ATP1A3//ATP1B1//ATP1B2//ATP1B3//ATP2A3//ATP6V0A1//ATP6V0B//ATP6V0C//ATP6V0D1//ATP6V0E1//ATP6V1A//ATP7A//ATP8A1//FXYD2
GO:0099131	ATP_hydrolysis_coupled_ion_transmembrane_transport	Biological Process	15	69	1492	18342	0.000358316	0.00681501	3.44573	2.67251	0.0100536	ATP1A1//ATP1A3//ATP1B1//ATP1B2//ATP1B3//ATP2A3//ATP6V0A1//ATP6V0B//ATP6V0C//ATP6V0D1//ATP6V0E1//ATP6V1A//ATP7A//ATP8A1//FXYD2
GO:0012501	programmed_cell_death	Biological Process	115	1038	1492	18342	0.000372257	0.00706045	3.42916	1.362	0.0770777	ADORA1//ANXA6//APLP1//APP//ARL6IP1//ARRB1//ATG5//BAG3//BAK1//BCAP31//BCL10//BCL2L12//BMF//BMP4//BRMS1//CARD6//CAV1//CD14//CD70//CDK5//CDKN2D//CEBPB//CLU//CSRNP1//CTSL//CTSV//CXCR4//CYP26B1//CYR61//DAB2IP//DEDD2//DHCR24//DIO3//DPF1//DRAM1//DYNLL1//EFNA5//EGLN3//ELMO2//ESPL1//EVA1A//FADD//FAM32A//FOXO1//FURIN//GRAMD4//GRK5//GSN//HMOX1//IER3//ITGAV//JUN//KRT14//KRT16//KRT18//KRT19//KRT3//KRT8//KRT81…
GO:0071241	cellular_response_to_inorganic_substance	Biological Process	31	200	1492	18342	0.000374436	0.0070639	3.42662	1.9055	0.0207775	AKR1C3//AQP1//ATP7A//BMP6//CACNA1H//CCNB1//CEBPA//CHUK//CYP1A1//EDN1//FOS//FOSB//FOXO1//GSN//HMOX1//ID2//JUN//KCNK3//LIG4//MCOLN1//MMP9//MT1B//MT1F//MT1X//PPARGC1A//PTGS2//RASGRP2//SNCA//TIGAR//TUBG1//WNT5A
GO:0031344	regulation_of_cell_projection_organization	Biological Process	78	653	1492	18342	0.000374514	0.0070639	3.42653	1.46845	0.0522788	APC//ARC//ATG5//ATP7A//BDNF//C15orf62//CAMK1D//CARMIL1//CAV1//CDC20//CDC42EP2//CDC42EP4//CDC42EP5//CDK5//CDKL5//CFL1//CRABP2//CRMP1//DAB2IP//DBN1//DOCK11//DPYSL2//EFNA5//EFNB2//EPHB3//F2RL1//FES//FGFR1//FKBP1B//FOXO6//FSCN1//FZD4//HAP1//ILK//ITGA2//ITM2C//KAT2A//KCTD17//KDM1A//KLF5//KLHL41//LRP1//LRP4//MAPT//MYLIP//NEURL1//NGFR//NPTN//NTN1//OLFM1//P3H1//PALM//PLEKHM1//PLK2//PPP2R5B//PTPRS//RAB17/…
GO:0043536	positive_regulation_of_blood_vessel_endothelial_cell_migration	Biological Process	16	77	1492	18342	0.000397338	0.00745311	3.40084	2.55451	0.0107239	ANXA1//FGF18//FGFBP1//FGFR1//FOXC2//GATA2//HIF1A//HMOX1//HSPB1//MAP2K3//PLK2//PTGS2//TGFB1//TMSB4X//VEGFA//VEGFC
GO:0050764	regulation_of_phagocytosis	Biological Process	16	77	1492	18342	0.000397338	0.00745311	3.40084	2.55451	0.0107239	ATG5//C4BPA//CAMK1D//CCL2//F2RL1//GATA2//ITGA2//ITGAV//MFGE8//PPARG//PRKCG//PRTN3//PTX3//SYT7//TGFB1//TNF
GO:0032869	cellular_response_to_insulin_stimulus	Biological Process	26	158	1492	18342	0.000424834	0.00794697	3.37178	2.02299	0.0174263	APC//ATP6V0A1//ATP6V0B//ATP6V0C//ATP6V0D1//ATP6V0E1//ATP6V1A//BCAR1//CEACAM1//CPEB2//ERRFI1//FOXC2//FOXO1//FOXO6//IGF2//INHBB//IRS2//LPIN1//PDK4//PIK3R3//PKM//PPARG//SH2B2//SLC9A1//SORBS1//TBC1D4
GO:0060341	regulation_of_cellular_localization	Biological Process	92	800	1492	18342	0.000427552	0.0079759	3.36901	1.41376	0.0616622	ABHD17C//AKAP5//APC//ARRB1//ASIC1//ATG5//BAG3//BAK1//BCAP31//BDNF//BMP4//CAV1//CDK5//CEMIP//CNIH2//CRIPT//DNAJA1//DNM1//DYNLL1//EFNA5//EHD1//FES//FKBP1B//FOXF1//GAS1//GATA2//GPSM2//GSN//HAP1//HIF1A//HMGCR//HMOX1//HSP90AA1//HSPA1L//HSPH1//HYAL2//IL13RA2//INSIG1//JPH3//KCNMB4//KDM1A//LRP1//LRP4//MAP1A//MAPT//MSN//MTMR2//NEFH//NGFR//NKD2//NLGN2//NPTN//NTSR1//OAZ1//OAZ2//PID1//PINK1//PLK1//PREB//PTGS…
GO:0043523	regulation_of_neuron_apoptotic_process	Biological Process	30	193	1492	18342	0.000439509	0.00817655	3.35703	1.91092	0.0201072	ARRB1//ARRB2//BDNF//CCL2//CDK5//CEBPB//CNTFR//CPEB4//CRLF1//EGLN3//EN1//EN2//G6PD//HIF1A//HMOX1//ILK//ITGA1//JUN//LIG4//LRP1//MAP3K12//NR4A3//PINK1//PPARGC1A//PRKCG//RETREG1//SNCA//STXBP1//TGFB2//UNC5B
GO:0002687	positive_regulation_of_leukocyte_migration	Biological Process	22	125	1492	18342	0.000446166	0.00827778	3.3505	2.16367	0.0147453	APP//CAMK1D//CREB3//CXCL14//CXCL8//EDN1//F2RL1//FADD//GPSM3//IL1R1//ITGA2//MMP14//PGF//RAC2//RARRES2//S100A14//TGFB1//TMEM102//TNF//VEGFA//VEGFC//WNT5A
GO:0010765	positive_regulation_of_sodium_ion_transport	Biological Process	9	30	1492	18342	0.000452056	0.00836427	3.34481	3.68807	0.00603217	ATP1B1//ATP1B2//ATP1B3//FXYD1//GLRX//PRSS8//SCN1B//SLC9A1//TESC
GO:0003279	cardiac_septum_development	Biological Process	19	101	1492	18342	0.000454669	0.00838982	3.3423	2.31265	0.0127346	ACVR1//BMP4//CYR61//ID2//LTBP1//LUZP1//MSX2//NOG//NRP2//PRDM1//RARB//RBM15//SMAD6//SOX4//TBX3//TGFB2//TGFBR3//WNT11//WNT5A
GO:0052547	regulation_of_peptidase_activity	Biological Process	57	447	1492	18342	0.000461791	0.0084982	3.33555	1.56764	0.0382038	ADRM1//APP//AQP1//ARL6IP1//ARRB1//ARRB2//BAK1//BCAP31//BCL10//BCL2L12//BST2//CAV1//CDKN2D//CST1//CST4//CYR61//DHCR24//ECM1//EFNA3//EGLN3//FADD//FBLN1//FURIN//GRAMD4//GSN//LAMP3//LCK//MAL//MAPT//MMP14//MMP9//NGFR//NKX3-1//PI3//PINK1//POR//PPARG//PSMD14//PTGS2//PTTG1//SERPINA1//SERPINB5//SERPINE2//SLPI//SNCA//SPOCK1//STAT3//TBC1D10A//TIMP1//TIMP3//TIMP4//TNF//TNFRSF1B//VCP//VEGFA//WFDC10B//WFIKKN1
GO:0051098	regulation_of_binding	Biological Process	48	360	1492	18342	0.00046959	0.00861843	3.32828	1.63914	0.0321716	ADRB2//APP//ARRB1//ARRB2//AURKA//BAK1//BAMBI//BDNF//BMP4//CAV1//CCPG1//CDK5//CDK9//CDON//CRMP1//DAB2IP//GTF2B//HMOX1//ID2//IFIT1//ITGA2//JUN//KAT2A//KDM1A//LFNG//LHX2//LRP1//MAD2L2//MMP9//MSX1//MSX2//NEK2//NES//NFKBIA//NKX3-1//NOG//PHLDA2//PIM2//PLK1//PLK2//PPARG//SLPI//TGFB1//TGFBR3//TMC8//TMSB4X//WFIKKN1//WNT5A
GO:0008219	cell_death	Biological Process	118	1077	1492	18342	0.000480417	0.00879345	3.31838	1.34693	0.0790885	ADORA1//ANXA6//APLP1//APP//ARL6IP1//ARRB1//ATG5//BAG3//BAK1//BCAP31//BCL10//BCL2L12//BMF//BMP4//BRMS1//CARD6//CAV1//CD14//CD70//CDK5//CDKN2D//CEBPB//CLU//CSRNP1//CTSL//CTSV//CXCR4//CYP26B1//CYR61//DAB2IP//DEDD2//DHCR24//DIO3//DPF1//DRAM1//DYNLL1//EFNA5//EGLN3//ELMO2//EMP2//ESPL1//EVA1A//FADD//FAM32A//FOXO1//FURIN//GRAMD4//GRK5//GSN//HMOX1//IER3//ITGAV//JUN//KRT14//KRT16//KRT18//KRT19//KRT3//KRT8/…
GO:0002829	negative_regulation_of_type_2_immune_response	Biological Process	6	14	1492	18342	0.000486117	0.00887392	3.31326	5.26867	0.00402145	ANXA1//ARG2//BCL6//HLX//IL27RA//SOCS5
GO:0001657	ureteric_bud_development	Biological Process	17	86	1492	18342	0.000491167	0.00891829	3.30877	2.43012	0.0113941	ARG2//BMP4//CALB1//CRLF1//FGFR1//FOXC2//GDF11//HOXA11//ILK//NOG//PGF//RARB//SMAD6//SOX9//TGFB1//WNT11//WNT6
GO:0008286	insulin_receptor_signaling_pathway	Biological Process	17	86	1492	18342	0.000491167	0.00891829	3.30877	2.43012	0.0113941	APC//ATP6V0A1//ATP6V0B//ATP6V0C//ATP6V0D1//ATP6V0E1//ATP6V1A//BCAR1//FOXC2//FOXO1//FOXO6//IGF2//IRS2//PDK4//PIK3R3//SH2B2//SORBS1
GO:0031175	neuron_projection_development	Biological Process	77	649	1492	18342	0.000498278	0.00901074	3.30253	1.45856	0.0516086	APP//ARC//ARTN//ATP7A//AURKA//B3GNT2//B4GAT1//BDNF//BICDL1//CAMSAP3//CBX6//CDK5//CRMP1//CXCR4//DAB2IP//DBNDD1//DOCK10//DPYSL2//EFHD1//EFNA2//EFNA3//EFNA4//EFNA5//EFNB1//EFNB2//EHD1//ENAH//EPHB3//GPRIN1//HSP90AA1//ILK//IRS2//ISL2//ITGA1//JUN//KIF3A//LHX2//LRFN3//LRP4//MAP1A//MAPT//MNX1//NECTIN1//NEFH//NEO1//NGFR//NOG//NPTX1//NPTXR//NR4A3//NRP2//NTN1//NYAP1//PAK4//PPP1R9B//RAB3A//RAC2//RTN4RL1//RTN…
GO:0002715	regulation_of_natural_killer_cell_mediated_immunity	Biological Process	11	43	1492	18342	0.000500229	0.00901074	3.30083	3.14487	0.00737265	ARRB2//CEACAM1//HAVCR2//MICA//MICB//NECTIN2//RAET1G//RAET1L//SH2D1B//ULBP2//ULBP3
GO:0010107	potassium_ion_import	Biological Process	11	43	1492	18342	0.000500229	0.00901074	3.30083	3.14487	0.00737265	ATP1A1//ATP1A3//ATP1B1//ATP1B2//ATP1B3//FXYD2//HCN2//KCNJ4//SLC12A2//SLC12A6//SLC12A8
GO:0048525	negative_regulation_of_viral_process	Biological Process	18	94	1492	18342	0.00050874	0.00913987	3.2935	2.35409	0.0120643	APOBEC3C//BST2//GSN//IFIT1//JUN//MID2//MX1//OAS1//OAS3//OASL//POU2F3//PTX3//SLPI//TNF//TRIM15//TRIM31//TRIM5//TRIM62
GO:0048666	neuron_development	Biological Process	91	794	1492	18342	0.000512568	0.00918441	3.29025	1.40896	0.060992	APP//ARC//ARTN//ATP7A//AURKA//B3GNT2//B4GAT1//BDNF//BICDL1//CAMSAP3//CBX6//CDK5//CRMP1//CXCR4//DAB2IP//DBNDD1//DIO3//DOCK10//DPYSL2//EFHD1//EFNA2//EFNA3//EFNA4//EFNA5//EFNB1//EFNB2//EHD1//EN1//EN2//ENAH//EPHB3//FGFR1//GATA2//GPRIN1//HS6ST1//HSP90AA1//ID2//ILK//IRS2//ISL2//ITGA1//JUN//KDM1A//KIF3A//LHX2//LRFN3//LRP4//MAP1A//MAPT//MNX1//MTMR2//NECTIN1//NEFH//NEO1//NGFR//NOG//NPTX1//NPTXR//NR4A3//NR…
GO:0030260	entry_into_host_cell	Biological Process	19	102	1492	18342	0.00051691	0.00920912	3.28659	2.28998	0.0127346	CAV1//CD81//CXCR4//EFNB2//HSPA1A//HSPA1B//HYAL2//ITGA2//ITGA5//ITGAV//ITGB3//KPNA3//LAMP3//LDLR//NECTIN1//NECTIN2//NECTIN4//SLC52A2//XPR1
GO:0003205	cardiac_chamber_development	Biological Process	26	160	1492	18342	0.000518005	0.00920912	3.28567	1.9977	0.0174263	ACVR1//ADAMTS1//BMP4//CPE//CYR61//DLL4//FOXC2//FOXF1//HIF1A//ID2//LTBP1//LUZP1//MSX2//NOG//NRP2//PRDM1//RARB//RBM15//SMAD6//SOX4//TBX3//TGFB1//TGFB2//TGFBR3//WNT11//WNT5A
GO:0007369	gastrulation	Biological Process	26	160	1492	18342	0.000518005	0.00920912	3.28567	1.9977	0.0174263	ACVR1//BMP4//EXT2//FOXC2//FOXF1//HOXA11//HSBP1//ITGA2//ITGA5//ITGA7//ITGAV//ITGB3//MMP14//MMP15//MMP2//MMP9//NOG//NR4A3//POGLUT1//RNF2//SNAI1//TRIM15//UGDH//WNT11//WNT5A//ZBTB17
GO:0046686	response_to_cadmium_ion	Biological Process	14	64	1492	18342	0.000521255	0.00924278	3.28295	2.68922	0.00938338	AKR1C3//ATP7A//CHUK//CYB5A//FOS//GSN//HMOX1//JUN//MMP9//MT1B//MT1F//MT1X//SLC30A1//SPARC
GO:0005975	carbohydrate_metabolic_process	Biological Process	60	479	1492	18342	0.000527048	0.00931454	3.27815	1.5399	0.0402145	AKR1B1//ALDOC//B3GLCT//B3GNT2//B3GNT7//B4GALNT1//B4GALT5//B4GAT1//CHST2//CHST6//CHST7//CREM//CRY1//CYB5A//DCXR//DHDH//ENO3//EXT2//FABP5//FUT3//FUT4//FUT8//G6PD//GALM//GCNT3//GLA//GM2A//GNE//GNPTAB//HK1//HYAL2//IDH1//IGF2//IRS2//ISYNA1//KLB//LDHA//ME1//MTMR2//NDUFAB1//NEU1//OAS1//OMA1//PC//PDK3//PDK4//PGAM1//PGM2L1//PGP//PKM//PPARGC1A//PPP1R3C//SLC2A3//SLC5A3//ST3GAL2//ST6GAL1//ST6GALNAC4//ST6GALN…
GO:0007015	actin_filament_organization	Biological Process	35	240	1492	18342	0.000528038	0.00931454	3.27733	1.79281	0.0234584	ADD3//ANG//ARRB1//BCAR1//CAP1//CARMIL1//CDC42EP2//CFL1//DBN1//EMP2//FAT1//FSCN1//GSN//IQGAP2//MAD2L2//MSRB1//PPP1R9B//RAC2//RFLNB//RHOB//RHOC//RHOU//RHOV//RND1//RND2//SHROOM2//SORBS1//TMOD1//TMOD2//TMOD3//TMSB4X//TPM3//VASP//WASF1//WASF3
GO:0051795	positive_regulation_of_timing_of_catagen	Biological Process	3	3	1492	18342	0.000537234	0.00940367	3.26984	12.2936	0.00201072	GAL//MSX2//TGFB2
GO:0090258	negative_regulation_of_mitochondrial_fission	Biological Process	3	3	1492	18342	0.000537234	0.00940367	3.26984	12.2936	0.00201072	MAPT//PINK1//PPARGC1A
GO:1903288	positive_regulation_of_potassium_ion_import	Biological Process	3	3	1492	18342	0.000537234	0.00940367	3.26984	12.2936	0.00201072	ATP1B1//ATP1B2//ATP1B3
GO:0015672	monovalent_inorganic_cation_transport	Biological Process	58	460	1492	18342	0.000549683	0.00959689	3.25989	1.55006	0.038874	AQP1//ASIC1//ATP1A1//ATP1A3//ATP1B1//ATP1B2//ATP1B3//ATP2A3//ATP6V0A1//ATP6V0B//ATP6V0C//ATP6V0D1//ATP6V0E1//ATP6V1A//CACNA1G//CACNA1H//CNNM4//COX6A1//CYB5A//FXYD1//FXYD2//HCN2//KCND1//KCNH2//KCNH3//KCNH4//KCNJ4//KCNK3//KCNK5//KCNMB4//MAGED2//NSF//SCN1B//SGK1//SHROOM2//SLC12A2//SLC12A6//SLC12A8//SLC17A5//SLC1A1//SLC1A3//SLC2A13//SLC2A6//SLC36A1//SLC38A2//SLC38A4//SLC45A3//SLC4A11//SLC4A2//SLC5A3/…
GO:0030574	collagen_catabolic_process	Biological Process	10	37	1492	18342	0.000557521	0.00970885	3.25374	3.32259	0.00670241	COL15A1//CTSD//CTSL//FURIN//MMP13//MMP14//MMP15//MMP2//MMP9//PRTN3
GO:0010717	regulation_of_epithelial_to_mesenchymal_transition	Biological Process	17	87	1492	18342	0.00056498	0.00973911	3.24797	2.40219	0.0113941	ACVR1//AXIN2//BAMBI//BMP4//COL1A1//DAB2IP//GCNT2//MAD2L2//NOG//OLFM1//SDCBP//SNAI1//TGFB1//TGFB2//TRIM62//VASN//ZNF703
GO:0061097	regulation_of_protein_tyrosine_kinase_activity	Biological Process	17	87	1492	18342	0.00056498	0.00973911	3.24797	2.40219	0.0113941	ADORA1//ADRA2B//AFAP1L2//APP//BDNF//CAV1//CBLB//EFNA5//EREG//ERRFI1//GPRC5B//HSPH1//HYAL2//NEURL1//SOCS5//SRCIN1//UNC119
GO:0072163	mesonephric_epithelium_development	Biological Process	17	87	1492	18342	0.00056498	0.00973911	3.24797	2.40219	0.0113941	ARG2//BMP4//CALB1//CRLF1//FGFR1//FOXC2//GDF11//HOXA11//ILK//NOG//PGF//RARB//SMAD6//SOX9//TGFB1//WNT11//WNT6
GO:0072164	mesonephric_tubule_development	Biological Process	17	87	1492	18342	0.00056498	0.00973911	3.24797	2.40219	0.0113941	ARG2//BMP4//CALB1//CRLF1//FGFR1//FOXC2//GDF11//HOXA11//ILK//NOG//PGF//RARB//SMAD6//SOX9//TGFB1//WNT11//WNT6
GO:0001957	intramembranous_ossification	Biological Process	4	6	1492	18342	0.000572219	0.00978955	3.24244	8.19571	0.00268097	AXIN2//COL1A1//FGF18//MMP2
GO:0002246	wound_healing_involved_in_inflammatory_response	Biological Process	4	6	1492	18342	0.000572219	0.00978955	3.24244	8.19571	0.00268097	HIF1A//HMOX1//TGFB1//TIMP1
GO:0060907	positive_regulation_of_macrophage_cytokine_production	Biological Process	4	6	1492	18342	0.000572219	0.00978955	3.24244	8.19571	0.00268097	GPRC5B//SEMA7A//SPON2//WNT5A
GO:1903364	positive_regulation_of_cellular_protein_catabolic_process	Biological Process	24	144	1492	18342	0.000574967	0.00981191	3.24036	2.04893	0.0160858	AURKA//BCAP31//CAV1//CD81//CEBPA//CLU//DAB2IP//HSP90AA1//HSPA1A//HSPA1B//LDLR//LRP1//MSN//NKD2//PLK1//PLK2//PSMC4//RNF139//RNF14//RNF144B//SOCS5//TRIB1//TRIB2//VCP
GO:0050927	positive_regulation_of_positive_chemotaxis	Biological Process	8	25	1492	18342	0.000578572	0.00983129	3.23764	3.93394	0.00536193	ARTN//CXCL8//F2RL1//ITGA2//PGF//S1PR1//VEGFA//VEGFC
GO:0043393	regulation_of_protein_binding	Biological Process	32	214	1492	18342	0.000578991	0.00983129	3.23733	1.83829	0.0214477	ADRB2//APP//ARRB1//ARRB2//AURKA//BAK1//BAMBI//BDNF//BMP4//CAV1//CCPG1//CDK5//CDON//CRMP1//DAB2IP//IFIT1//KDM1A//LFNG//LRP1//MMP9//NES//NKX3-1//NOG//PHLDA2//PIM2//PLK1//PLK2//SLPI//TGFBR3//TMC8//WFIKKN1//WNT5A
GO:0008593	regulation_of_Notch_signaling_pathway	Biological Process	18	95	1492	18342	0.000580792	0.00983735	3.23598	2.32931	0.0120643	ARRB1//BCL6//DLL4//DLX2//EGFL7//ELF3//GATA2//LFNG//MMP14//NEURL1//NFKBIA//NOTCH3//POGLUT1//STAT3//TGFB2//TSPAN14//TSPAN17//TSPAN5
GO:0048754	branching_morphogenesis_of_an_epithelial_tube	Biological Process	23	136	1492	18342	0.000601021	0.0101547	3.22111	2.07906	0.0154155	ACVR1//BMP4//COL4A1//DLL4//EDN1//FOXC2//FOXF1//HOXA11//ILK//KDM5B//MMP14//MSX2//NKX3-1//PGF//RBM15//RDH10//SOX9//TBX3//TGFB1//VDR//VEGFA//WNT5A//WNT6
GO:0006873	cellular_ion_homeostasis	Biological Process	74	623	1492	18342	0.00061541	0.0103721	3.21084	1.46023	0.0495979	ABCC2//ADRA1B//ANXA6//APP//ATP1A1//ATP1A3//ATP1B1//ATP1B2//ATP1B3//ATP2A3//ATP6V0A1//ATP6V0B//ATP6V0C//ATP6V0D1//ATP6V0E1//ATP6V1A//ATP7A//BAK1//BCAP31//BDKRB2//BMP6//CALB1//CALB2//CAV1//CCRL2//CD52//CEMIP//CIB2//CKB//CXCR4//EDN1//F2RL1//FKBP1B//GATA2//GPR17//GPR4//HAP1//HIF1A//HMOX1//ITGAV//JPH3//KCNK3//KCTD17//LCK//MCOLN1//MICU1//MT1B//MT1F//MT1X//NPTN//NTSR1//PTGER2//PTGER4//RAB20//S1PR1//SCAR…
GO:0019725	cellular_homeostasis	Biological Process	96	851	1492	18342	0.000619834	0.0104209	3.20772	1.38682	0.0643432	ABCC2//ADRA1B//ANXA6//APP//AQP1//ATG5//ATP1A1//ATP1A3//ATP1B1//ATP1B2//ATP1B3//ATP2A3//ATP6V0A1//ATP6V0B//ATP6V0C//ATP6V0D1//ATP6V0E1//ATP6V1A//ATP7A//BAK1//BCAP31//BDKRB2//BMP6//CALB1//CALB2//CAV1//CCL2//CCRL2//CD52//CEMIP//CIB2//CKB//CXCR4//DEDD2//EDN1//ERO1B//F2RL1//FKBP1B//FOXO1//GATA2//GLRX//GPR17//GPR4//HAP1//HIF1A//HK1//HMOX1//IRS2//ITGAV//JPH3//KCNK3//KCTD17//LCK//MCOLN1//MICU1//MT1B//MT1…
GO:0019217	regulation_of_fatty_acid_metabolic_process	Biological Process	16	80	1492	18342	0.000621587	0.0104246	3.2065	2.45871	0.0107239	ADIPOR2//ANXA1//CAV1//CEACAM1//INSIG1//IRS2//NR4A3//PDK3//PDK4//PDP2//PPARG//PPARGC1A//PTGS2//SIRT4//SLC45A3//SNCA
GO:0043405	regulation_of_MAP_kinase_activity	Biological Process	50	384	1492	18342	0.000626547	0.0104723	3.20305	1.60072	0.0335121	ADORA1//ADRA2B//ARRB1//BMP4//CAV1//CD81//CRKL//CXCR4//DAB2IP//DIRAS1//DNAJA1//DUSP10//DUSP14//DUSP6//DUSP9//EDN1//EPHB3//EPHB4//FGF18//FGFR1//FGFR4//FZD10//FZD4//HMGCR//HYAL2//ILK//ITGA1//MADD//MAP2K3//MAP2K6//MAP3K10//MAP3K12//MAP3K8//MAPK8IP1//MAPKAPK2//RGS14//RGS2//RGS3//S1PR2//SPRY4//TGFB1//TLR4//TNF//TPD52L1//TRIB1//TRIB2//UBB//VEGFA//WNT5A//WNT7B
GO:0007584	response_to_nutrient	Biological Process	31	206	1492	18342	0.000627507	0.0104723	3.20238	1.85	0.0207775	ACSL1//ADIPOR2//AKR1C3//AQP3//CDKN2B//CDKN2D//CIB2//COL1A1//CYP1A1//CYP24A1//CYP26B1//FKBP1B//GDAP1//GSN//HMGCR//HMOX1//ITGA2//LDHA//MTHFR//PANX1//PKM//POR//PPARG//PTGS2//SLC27A4//SPARC//SPP1//STC1//TGFB1//VDR//ZNF354A
GO:1900451	positive_regulation_of_glutamate_receptor_signaling_pathway	Biological Process	5	10	1492	18342	0.000629571	0.0104811	3.20096	6.14678	0.00335121	ADRB2//ARC//PINK1//SHANK3//UNC13A
GO:0023014	signal_transduction_by_protein_phosphorylation	Biological Process	51	394	1492	18342	0.000637146	0.0105532	3.19576	1.5913	0.0341823	ARTN//CAMK2G//CCL2//CDC42EP5//CHUK//CRKL//CSF2//DAB2IP//DUSP6//DUSP9//EPHB3//EPHB4//EREG//FGF18//FGF19//FGFR1//FGFR4//HBEGF//IL2RG//IL31RA//ILK//IRS2//ITGAV//KBTBD7//KCNH2//KCNH3//KCNH4//KITLG//KLB//MAP2K3//MAP2K6//MAP3K10//MAP3K12//MAP3K8//MAPK8IP1//MAPKAPK2//NRG4//PAK4//PAK6//PTGER4//RASGEF1A//SHANK3//SOX9//TGFB1//TNF//TRIB1//UBB//WDR83//WNT5A//WNT7B//ZFP36L2
GO:0032370	positive_regulation_of_lipid_transport	Biological Process	13	58	1492	18342	0.000638553	0.0105532	3.1948	2.75545	0.00871314	ABCG1//ATP8A1//BMP6//EDN1//GAL//LRP1//MAP2K6//NFKBIA//NKX3-1//NTSR1//PLA2R1//PLTP//SPP1
GO:0046928	regulation_of_neurotransmitter_secretion	Biological Process	13	58	1492	18342	0.000638553	0.0105532	3.1948	2.75545	0.00871314	ASIC1//KCNMB4//RAB3A//RIMS3//RIMS4//SEPT5//SLC30A1//SNCA//SNCG//STX1A//STXBP1//SYT12//UNC13A
GO:0007548	sex_differentiation	Biological Process	37	261	1492	18342	0.000643766	0.0106136	3.19127	1.74277	0.0247989	ADAMTS1//ADGRG1//AKR1C3//ANG//ARID5B//ARRB1//ARRB2//BAK1//BMP6//CEBPB//CNTFR//COL9A3//CTSV//DHCR24//EREG//FOXF2//FZD4//HOXA11//IDH1//INHBB//KITLG//LFNG//LHFPL2//MAMLD1//MMP14//NKX3-1//PRDX4//RDH10//SOX15//SOX9//TBX3//TEX19//TFAP2C//TGFB2//VEGFA//VGF//WNT5A
GO:0061061	muscle_structure_development	Biological Process	59	473	1492	18342	0.000648982	0.010668	3.18777	1.53345	0.0395442	ACVR1//ARID5B//ATG5//BMP4//CACNA1H//CAV1//CCNB1//CDK5//CDON//CHUK//CNTFR//COL3A1//DLL4//DNER//EGR1//EGR3//FHL1//FOS//FOXC2//FOXF1//FOXN2//HBEGF//HLX//HMGCR//IGF2//IGSF8//ITGA7//KAT2A//KDM1A//KLF5//KLHL41//KRT19//KRT8//MSX1//MTPN//MYH15//NEURL1//NOG//PLEKHO1//RARB//S1PR1//SLC9A1//SORT1//SOX15//SOX9//TBX3//TGFB1//TGFB2//TGFBR3//TMOD1//TMOD2//TMOD3//TNNT1//UNC45A//USP2//VEGFA//WFIKKN1//WNT5A//ZBTB18
GO:0045664	regulation_of_neuron_differentiation	Biological Process	73	614	1492	18342	0.000650202	0.010668	3.18695	1.46161	0.0489276	ADRA2B//APP//ARC//BCL6//BDNF//BMP4//BMP6//CAMK1D//CASZ1//CDC20//CDK5//CDKL5//CDON//CFL1//CRABP2//CRMP1//DAB2IP//DBN1//DIXDC1//DLX2//DPYSL2//EFNA3//EFNA5//EFNB2//EPHB3//FES//FGFR1//FKBP1B//FOXO6//FZD4//GATA2//GDF11//GPRC5B//ID2//ILK//ISL2//ITM2C//KDM1A//LRP1//LRP4//MAPT//MYLIP//NEURL1//NGFR//NOTCH3//NPTN//NTN1//OLFM1//P3H1//PLK2//PPP2R5B//PTPRS//RAB17//RAB29//RARB//RND2//RTN4RL1//RTN4RL2//SCN1B//S…
GO:2001243	negative_regulation_of_intrinsic_apoptotic_signaling_pathway	Biological Process	18	96	1492	18342	0.00066146	0.0108266	3.1795	2.30504	0.0120643	BCL2L12//BDKRB2//CDKN2D//CLU//CREB3//CREB3L1//DNAJA1//HIF1A//HSPA1A//HSPB1//HSPH1//KDM1A//MAPK8IP1//MMP9//PINK1//PTGS2//SNAI1//ZNF385A
GO:0071356	cellular_response_to_tumor_necrosis_factor	Biological Process	30	198	1492	18342	0.000679046	0.0110878	3.1681	1.86266	0.0201072	ABCC2//CCL2//CCL26//CD58//CD70//CEBPA//CHUK//COL1A1//CXCL8//DAB2IP//EDN1//GBP2//HYAL2//ILK//KAT2A//KRT18//KRT8//NFKBIA//NGFR//NKX3-1//OCLN//PIAS3//PID1//PPARGC1A//TMSB4X//TNF//TNFRSF1B//TNFRSF9//TNFSF9//ZFP36L2
GO:0055065	metal_ion_homeostasis	Biological Process	72	605	1492	18342	0.000686893	0.0111891	3.16311	1.46304	0.0482574	ADRA1B//ANXA6//APP//ATP1A1//ATP1A3//ATP1B1//ATP1B2//ATP1B3//ATP2A3//ATP6V0D1//ATP6V1A//ATP7A//BAK1//BCAP31//BDKRB2//BMP6//CALB1//CALB2//CAV1//CCRL2//CD52//CEMIP//CIB2//CNNM4//CXCR4//EDN1//F2RL1//FKBP1B//GATA2//GPR17//GPR4//HAP1//HIF1A//HMOX1//HYAL2//ITGAV//JPH3//KCNH2//KCNK3//KCTD17//LCK//MCOLN1//MICU1//MT1B//MT1F//MT1X//NEO1//NPTN//NTSR1//PTGER2//PTGER4//S100A14//S1PR1//SCARA5//SLC12A2//SLC12A6/…
GO:0010721	negative_regulation_of_cell_development	Biological Process	42	309	1492	18342	0.000697796	0.0113251	3.15627	1.67097	0.0281501	ADGRG1//AP1AR//APP//C16orf45//CDK5//COL3A1//CRMP1//DIXDC1//DLX2//DUSP10//EFNA5//EFNB2//FBLN1//G6PD//GAL//GDF11//ID2//ISL2//ITM2C//LDLR//LRP1//LRP4//MYLIP//NGFR//NOG//NOTCH3//NTN1//PLK2//PTPRS//RAB29//RFLNB//RTN4RL1//RTN4RL2//SEMA6B//SEMA6C//SEMA7A//SOX9//SPOCK1//SPP1//STAT3//TGFB1//WNT5A
GO:0046697	decidualization	Biological Process	7	20	1492	18342	0.000698565	0.0113251	3.15579	4.30275	0.00469169	BSG//CTSV//EPOR//PTGS2//SPP1//STC1//VDR
GO:0043409	negative_regulation_of_MAPK_cascade	Biological Process	27	172	1492	18342	0.000710228	0.0114868	3.1486	1.9298	0.0180965	ARRB1//BMP4//C1QL4//CAV1//DAB2IP//DNAJA1//DUSP10//DUSP14//DUSP6//DUSP9//ERRFI1//F2RL1//FBLN1//FOXO1//HMGCR//HSPH1//HYAL2//MAPK8IP1//NDRG2//PINK1//RGS14//RGS2//RGS3//SLC9A3R1//SPRY4//TIMP3//TLR4
GO:0007423	sensory_organ_development	Biological Process	63	515	1492	18342	0.000721687	0.0116445	3.14165	1.50387	0.0422252	ARL6//ATG5//BAK1//BCAR3//BMP4//BMP6//CALB1//CDON//CEBPA//COL4A1//COL8A2//CXCL14//CYP1A1//CYP26B1//DIO3//EDN1//FGFR1//FOXC2//FZD4//GATA2//GDF11//HIF1A//HMX2//HMX3//HOXC13//INSIG1//JMJD6//JUN//KCNK3//KDM5B//LHX2//MAFB//MAPKAPK2//MFAP2//MSX1//MYH15//NECTIN1//NES//NINJ1//NKX3-2//NOG//NR4A3//NTN1//PRDM1//RARB//RDH10//ROM1//RORB//SH3PXD2B//SHROOM2//SLC9A3R1//SOX9//SPARC//STAT3//TGFB1//TGFB2//TMOD1//TSP…
GO:0060485	mesenchyme_development	Biological Process	31	208	1492	18342	0.000740289	0.0119164	3.1306	1.83221	0.0207775	ACVR1//BMP4//CFL1//EDN1//EFNB1//FAM83D//FGF19//FGFR1//FOXC2//FOXF1//FOXF2//HIF1A//MEOX1//MSX1//MSX2//NOG//OLFM1//POGLUT1//RANBP3L//RDH10//RFLNB//SEMA6B//SEMA6C//SEMA7A//SNAI1//SOX9//TGFB1//TGFB2//TGFBR3//WNT11//WNT5A
GO:0001505	regulation_of_neurotransmitter_levels	Biological Process	42	310	1492	18342	0.00074527	0.0119683	3.12769	1.66558	0.0281501	ARG2//ARL6IP1//ASIC1//ATP7A//C2CD4C//CAV1//CDK5//CLU//DDAH1//DDAH2//EDN1//GCHFR//GLA//GLUL//HSP90AA1//KCNMB4//LIN7C//NTSR1//POR//PTGS2//PTX3//RAB3A//RIMS3//RIMS4//SEPT5//SLC1A1//SLC1A3//SLC30A1//SNCA//SNCG//SNPH//SPR//STX1A//STXBP1//SYT12//SYT7//SYTL2//SYTL4//TC2N//TLR4//TNF//UNC13A
GO:0045744	negative_regulation_of_G-protein_coupled_receptor_protein_signaling_pathway	Biological Process	11	45	1492	18342	0.00075927	0.0121644	3.1196	3.00509	0.00737265	ADRB2//APLP1//ARRB1//ARRB2//CRY1//CXCL8//DNM1//PALM//RGS14//RGS2//SNCA
GO:0010039	response_to_iron_ion	Biological Process	9	32	1492	18342	0.000764084	0.0122128	3.11686	3.45757	0.00603217	ATP7A//BMP6//CCNB1//CYP1A1//G6PD//HIF1A//HMOX1//SNCA//TFF1
GO:0001818	negative_regulation_of_cytokine_production	Biological Process	35	245	1492	18342	0.000772479	0.0122951	3.11211	1.75622	0.0234584	ANXA1//ARG2//ARRB1//ARRB2//BCL6//BST2//CD83//CEACAM1//DDX58//ERRFI1//F2RL1//FFAR4//FGFR1//FURIN//HAVCR2//HMOX1//IL1R2//IL1RL1//INHBB//LAPTM4B//NDRG2//PTGER4//PTPRS//SIGIRR//SOCS5//SRGN//TGFB1//TGFB2//TLR4//TMSB4X//TNF//TNFRSF9//TRIB2//UFD1//WNT11
GO:0055081	anion_homeostasis	Biological Process	12	52	1492	18342	0.000774245	0.0122951	3.11112	2.83698	0.0080429	ABCC2//ABCG1//ADORA1//CA12//CKB//DGAT1//FGFR4//SLC12A2//SLC12A6//SLC12A8//SLC9A3R1//XPR1
GO:0016051	carbohydrate_biosynthetic_process	Biological Process	22	130	1492	18342	0.000774652	0.0122951	3.11089	2.08045	0.0147453	AKR1B1//ALDOC//B3GNT2//B3GNT7//B4GALT5//B4GAT1//CRY1//ENO3//EXT2//FUT3//FUT8//G6PD//ISYNA1//NDUFAB1//PC//PGAM1//PGM2L1//PGP//PPARGC1A//PPP1R3C//ST3GAL2//ST6GALNAC6
GO:0061037	negative_regulation_of_cartilage_development	Biological Process	8	26	1492	18342	0.000776634	0.0122979	3.10978	3.78264	0.00536193	BMP4//NKX3-2//NOG//PTHLH//RARB//RFLNB//SOX9//WNT11
GO:0010632	regulation_of_epithelial_cell_migration	Biological Process	38	273	1492	18342	0.00078066	0.012333	3.10754	1.71119	0.0254692	ANXA1//BCAR1//BMP4//CEACAM1//DAB2IP//DLL4//DUSP10//EDN1//EMP2//FGF18//FGFBP1//FGFR1//FOXC2//GATA2//HBEGF//HIF1A//HMOX1//HSPB1//ITGA2//ITGB3//JUN//MAP2K3//MMP9//NRP2//PLK2//PLPP3//PPARG//PTGS2//RHOB//SOX9//SPARC//STC1//TGFB1//TGFB2//TMSB4X//VEGFA//VEGFC//WNT5A
GO:0001910	regulation_of_leukocyte_mediated_cytotoxicity	Biological Process	15	74	1492	18342	0.000784928	0.0123717	3.10517	2.49194	0.0100536	ARRB2//CEACAM1//F2RL1//FADD//HAVCR2//HLA-A//HLA-B//IL7R//MICA//MICB//NECTIN2//RAET1G//RAET1L//ULBP2//ULBP3
GO:0007163	establishment_or_maintenance_of_cell_polarity	Biological Process	29	191	1492	18342	0.000799187	0.0125449	3.09735	1.86656	0.019437	AQP1//CAMSAP3//CAP1//CENPA//CFL1//CYP26B1//FAM89B//FAT1//FOXF1//FRMD4B//FSCN1//GPSM2//HSP90AA1//ILK//LHX2//LIN7C//MSN//RHOB//RHOC//RHOU//RHOV//RND1//RND2//SAPCD2//SLC9A1//SLC9A3R1//WNT11//WNT5A//WNT7B
GO:0034612	response_to_tumor_necrosis_factor	Biological Process	32	218	1492	18342	0.000799598	0.0125449	3.09713	1.80456	0.0214477	ABCC2//CCL2//CCL26//CD14//CD58//CD70//CEBPA//CHUK//COL1A1//CXCL8//DAB2IP//EDN1//GBP2//HYAL2//ILK//KAT2A//KRT18//KRT8//NFKBIA//NGFR//NKX3-1//OCLN//PIAS3//PID1//PPARGC1A//PTGS2//TMSB4X//TNF//TNFRSF1B//TNFRSF9//TNFSF9//ZFP36L2
GO:0030001	metal_ion_transport	Biological Process	77	660	1492	18342	0.000813513	0.0127338	3.08964	1.43425	0.0516086	ABCC2//ANXA6//AQP1//ASIC1//ATP1A1//ATP1A3//ATP1B1//ATP1B2//ATP1B3//ATP2A3//ATP6V0A1//ATP6V0B//ATP6V0C//ATP6V0D1//ATP6V0E1//ATP6V1A//ATP7A//CACNA1G//CACNA1H//CAMK2G//CAV1//CDK5//CNNM4//FKBP1B//FXYD1//FXYD2//HCN2//ITGAV//JPH3//KCND1//KCNH2//KCNH3//KCNH4//KCNJ4//KCNK3//KCNK5//KCNMB4//LCK//MAGED2//MCOLN1//MICU1//NDFIP2//NECTIN1//NSF//PANX1//REP15//SCARA5//SCN1B//SGK1//SHROOM2//SLC12A2//SLC12A6//SLC12…
GO:0042058	regulation_of_epidermal_growth_factor_receptor_signaling_pathway	Biological Process	16	82	1492	18342	0.000824868	0.0128819	3.08362	2.39874	0.0107239	ADORA1//ADRA2B//AFAP1L2//APP//CBLB//CEACAM1//DAB2IP//EREG//ERRFI1//HAP1//ITGA1//MMP9//MVB12A//NEURL1//SH3KBP1//SOCS5
GO:0045893	positive_regulation_of_transcription,_DNA-templated	Biological Process	158	1529	1492	18342	0.000842562	0.0131282	3.0744	1.27036	0.105898	ACVR1//ADRB2//AFAP1L2//APP//ARID3B//ARNT2//ARNTL//ARRB1//ATXN7L3//BAMBI//BCL10//BCL2L12//BMP4//BMP6//CASZ1//CCPG1//CD81//CDK9//CDKN1C//CDKN2B//CDON//CEBPA//CEBPB//CGA//CHUK//CKS2//COL1A1//CREB3//CREB3L1//CREB3L3//CREM//CSRNP1//CXXC1//CYR61//DAB2IP//DDN//DDX58//DLGAP5//DLX2//DLX3//DPF1//EDN1//EGR1//EGR3//EHF//ELF3//EN1//EN2//ETV4//F2RL1//FADD//FOS//FOSB//FOXC2//FOXD2//FOXF1//FOXF2//FOXN2//FOXO1//F…
GO:0001707	mesoderm_formation	Biological Process	14	67	1492	18342	0.000847264	0.0131413	3.07198	2.5688	0.00938338	ACVR1//BMP4//EXT2//FOXC2//FOXF1//HOXA11//ITGA2//ITGB3//NOG//NR4A3//SNAI1//TRIM15//WNT11//WNT5A
GO:0046889	positive_regulation_of_lipid_biosynthetic_process	Biological Process	14	67	1492	18342	0.000847264	0.0131413	3.07198	2.5688	0.00938338	ABCG1//ABHD6//ANXA1//BMP6//CYR61//LDLR//POR//PPARGC1A//PTGS2//SIRT4//SLC45A3//SMPD2//SORBS1//TNF
GO:0045137	development_of_primary_sexual_characteristics	Biological Process	31	210	1492	18342	0.000870473	0.0134706	3.06024	1.81476	0.0207775	ADAMTS1//ADGRG1//AKR1C3//ANG//ARID5B//ARRB1//ARRB2//CEBPB//COL9A3//CTSV//EREG//FZD4//HOXA11//IDH1//INHBB//KITLG//LFNG//LHFPL2//MAMLD1//MMP14//NKX3-1//PRDX4//RDH10//SOX15//SOX9//TEX19//TFAP2C//TGFB2//VEGFA//VGF//WNT5A
GO:0071375	cellular_response_to_peptide_hormone_stimulus	Biological Process	36	256	1492	18342	0.000877381	0.0135467	3.05681	1.72878	0.0241287	APC//ATP6V0A1//ATP6V0B//ATP6V0C//ATP6V0D1//ATP6V0E1//ATP6V1A//BCAR1//CAV1//CEACAM1//CPEB2//CYP11A1//EDN1//ERRFI1//FOXC2//FOXO1//FOXO6//GLP2R//IGF2//INHBB//IRS2//LPIN1//NR4A1//NR4A3//PDK4//PIK3R3//PKM//POR//PPARG//PRKAR2B//SH2B2//SLC9A1//SORBS1//STAT3//TBC1D4//TGFB1
GO:0031346	positive_regulation_of_cell_projection_organization	Biological Process	46	351	1492	18342	0.000882409	0.0135935	3.05433	1.61112	0.0308311	APC//ATP7A//BDNF//C15orf62//CAMK1D//CARMIL1//CDC42EP2//CDC42EP4//CDC42EP5//CDKL5//CRABP2//DAB2IP//DOCK11//EFNA5//F2RL1//FES//FGFR1//FKBP1B//FOXO6//FSCN1//FZD4//HAP1//ILK//ITGA2//KAT2A//KCTD17//KDM1A//MAPT//NEURL1//NGFR//NPTN//NTN1//P3H1//PALM//PLEKHM1//PPP2R5B//RAC2//RALA//RND2//SCN1B//SEMA7A//SHANK3//UNC13A//VEGFA//WNT5A//ZMYND8
GO:0060828	regulation_of_canonical_Wnt_signaling_pathway	Biological Process	33	229	1492	18342	0.000924586	0.0141939	3.03405	1.77156	0.022118	APC//ARNTL//AXIN2//BAMBI//CAV1//COL1A1//DAB2IP//DIXDC1//EGR1//FAM53B//FOXO1//FZD7//GPRC5B//IGFBP4//IGFBP6//ILK//KREMEN2//LGR6//LRP4//MAD2L2//NKD2//NOG//SLC9A3R1//SOX4//SOX9//SULF2//TLE2//TLE3//TMEM170B//VCP//WNT11//WNT5A//ZNF703
GO:1903307	positive_regulation_of_regulated_secretory_pathway	Biological Process	11	46	1492	18342	0.000925556	0.0141939	3.0336	2.93977	0.00737265	CACNA1G//CACNA1H//CDK5//F2RL1//GATA2//RAB3A//RAB3D//SCAMP5//STX1A//STXBP1//SYT7
GO:0007613	memory	Biological Process	20	115	1492	18342	0.000927891	0.0141978	3.0325	2.13801	0.0134048	ARC//ASIC1//BDNF//CALB1//CCND2//CEBPB//CIC//FOXO6//ITGA5//JPH3//KAT2A//LDLR//MAP1A//MAPT//NTAN1//PLK2//PTGS2//RGS14//SGK1//SHANK3
GO:0050890	cognition	Biological Process	39	285	1492	18342	0.000933562	0.0142525	3.02986	1.68228	0.0261394	ADORA1//APP//ARC//ASIC1//ATP8A1//BDNF//CALB1//CCND2//CDK5//CEBPB//CIC//EN1//FOS//FOXO6//GM2A//HIF1A//HMGCR//ITGA5//JPH3//JUN//KAT2A//LDLR//MAP1A//MAPT//NPTN//NRGN//NTAN1//NTSR1//PLK2//PRKAR2B//PRKCG//PTGS2//RGS14//SGK1//SHANK3//THRA//TMOD2//TUSC3//ZNF385A
GO:0009612	response_to_mechanical_stimulus	Biological Process	31	211	1492	18342	0.000942771	0.0143609	3.02559	1.80616	0.0207775	AQP1//ATP1A1//BAG3//BAK1//BCL10//BMP6//CCNB1//COL1A1//COL3A1//EDN1//FADD//FOS//FOSB//ITGA2//JUN//MMP14//MTPN//NFKBIA//PPARG//PTGER4//PTGS2//SERPINE2//SHANK3//SLC1A3//SLC38A2//SLC9A1//SMPD2//SOX9//TGFB1//TLR4//WNT11
GO:0001823	mesonephros_development	Biological Process	17	91	1492	18342	0.000963211	0.0145592	3.01628	2.2966	0.0113941	ARG2//BMP4//CALB1//CRLF1//FGFR1//FOXC2//GDF11//HOXA11//ILK//NOG//PGF//RARB//SMAD6//SOX9//TGFB1//WNT11//WNT6
GO:0001817	regulation_of_cytokine_production	Biological Process	74	633	1492	18342	0.000963352	0.0145592	3.01622	1.43716	0.0495979	AFAP1L2//AGPAT2//ANXA1//ARG2//ARRB1//ARRB2//ATG5//BCL10//BCL6//BST2//BTN2A1//CD14//CD58//CD83//CEACAM1//CEBPB//CHUK//CLU//CSF2//DDX58//EGR1//EREG//ERRFI1//F2RL1//FADD//FFAR4//FGFR1//FURIN//GPRC5B//GPSM3//HAVCR2//HIF1A//HMOX1//HSPA1A//HSPA1B//HSPB1//HYAL2//IL18R1//IL1R2//IL1RL1//IL27RA//INHBB//LAPTM4B//LPL//MALT1//MAP2K3//MAPKAPK2//NDRG2//NR4A3//PANX1//PELI1//PTGER4//PTGS2//PTPRS//RAET1G//RNF26//S…
GO:0010469	regulation_of_signaling_receptor_activity	Biological Process	74	633	1492	18342	0.000963352	0.0145592	3.01622	1.43716	0.0495979	ADORA1//ADRA2B//ADRB2//APP//ARC//ARTN//BDNF//BMP4//BMP6//CBLB//CCL2//CCL26//CD320//CD70//CDC42EP2//CDK5//CGA//CMTM6//CNIH2//CRLF1//CSF2//CXCL14//CXCL8//EDN1//EFNA5//ENDOU//EREG//ERRFI1//FGF18//FGF19//GAL//GAST//GDF11//GMFG//HBEGF//IGF2//INHBB//KCNK3//KITLG//LY6E//MAPT//NCOA3//NEURL1//NLGN2//NMB//NOG//NRG4//NTS//OSGIN1//PGF//PHLDA2//PINK1//PPARGC1A//PPP2R5B//PTHLH//SEMA6B//SEMA6C//SEMA7A//SHANK3//…
GO:0031328	positive_regulation_of_cellular_biosynthetic_process	Biological Process	197	1968	1492	18342	0.000969425	0.0145592	3.01349	1.23061	0.132038	ACVR1//ADRB2//AFAP1L2//AKAP5//ANXA1//APP//ARID3B//ARID5B//ARNT2//ARNTL//ARRB1//ARRB2//ATXN7L3//BAMBI//BCL10//BCL2L12//BMP4//BMP6//CASZ1//CCPG1//CD81//CDK9//CDKN1C//CDKN2B//CDON//CEBPA//CEBPB//CGA//CHUK//CKS2//CLU//COL1A1//CREB3//CREB3L1//CREB3L3//CREM//CSRNP1//CXXC1//CYR61//DAB2IP//DDAH1//DDAH2//DDN//DDX58//DLGAP5//DLX2//DLX3//DPF1//EDN1//EGR1//EGR3//EHF//ELF3//EN1//EN2//EREG//ETV4//F2RL1//FADD//…
GO:0010869	regulation_of_receptor_biosynthetic_process	Biological Process	7	21	1492	18342	0.000974807	0.0145592	3.01108	4.09786	0.00469169	ANKRD13C//EDN1//FURIN//HIF1A//ITGAV//ITGB3//PPARG
GO:0030225	macrophage_differentiation	Biological Process	7	21	1492	18342	0.000974807	0.0145592	3.01108	4.09786	0.00469169	APP//BMP4//CEBPA//IL31RA//L3MBTL3//MMP9//VEGFA
GO:0045956	positive_regulation_of_calcium_ion-dependent_exocytosis	Biological Process	7	21	1492	18342	0.000974807	0.0145592	3.01108	4.09786	0.00469169	CACNA1G//CACNA1H//CDK5//SCAMP5//STX1A//STXBP1//SYT7
GO:0070233	negative_regulation_of_T_cell_apoptotic_process	Biological Process	7	21	1492	18342	0.000974807	0.0145592	3.01108	4.09786	0.00469169	ARG2//BMP4//FADD//HIF1A//IL7R//TSC22D3//TSC22D4
GO:0033280	response_to_vitamin_D	Biological Process	9	33	1492	18342	0.000975635	0.0145592	3.01071	3.35279	0.00603217	AQP3//CDKN2D//CYP24A1//GDAP1//PTGS2//SPP1//STC1//TGFB1//VDR
GO:0019318	hexose_metabolic_process	Biological Process	25	158	1492	18342	0.000977172	0.0145592	3.01003	1.94518	0.016756	AKR1B1//ALDOC//B3GLCT//CREM//CRY1//DCXR//ENO3//FABP5//FUT4//FUT8//G6PD//GALM//HK1//IGF2//IRS2//OAS1//OMA1//PC//PDK3//PDK4//PGAM1//PGM2L1//PKM//PPARGC1A//TNF
GO:0045785	positive_regulation_of_cell_adhesion	Biological Process	50	392	1492	18342	0.000994479	0.0147847	3.0024	1.56806	0.0335121	ADGRG1//ANXA1//BCL10//BCL6//CARMIL1//CAV1//CCL2//CD83//CRKL//CYR61//DUSP10//EFNB1//EGR3//EMILIN2//EMP2//FADD//FBLN2//FOXC2//FOXF1//GCNT2//HAVCR2//HLX//HSPH1//IGF2//IL7R//ILK//ITGA2//ITGA5//ITGAV//LCK//MALT1//MAP3K8//NINJ1//NR4A3//PLPP3//RELL2//RSU1//SOCS1//SOCS5//TGFB1//TGFB2//TGM2//TMEM102//TNF//TNFSF9//VAV3//VEGFA//VEGFC//WNT5A//ZBTB7B
GO:0000904	cell_morphogenesis_involved_in_differentiation	Biological Process	65	542	1492	18342	0.00100568	0.0149187	2.99754	1.47432	0.0435657	APP//ARC//ARTN//B3GNT2//B4GAT1//BDNF//CDK5//COL21A1//COL6A2//CRMP1//CXCR4//DOCK10//DPYSL2//EFNA2//EFNA3//EFNA4//EFNA5//EFNB1//EFNB2//ENAH//EPHB3//FZD4//FZD7//HSP90AA1//ID2//ILK//IRS2//ISL2//ITGAV//ITGB3//KIF3A//LHX2//LRFN3//LRP4//MAP1A//MATN3//NECTIN1//NEFH//NEO1//NGFR//NOG//NPTX1//NR4A3//NRP2//NTN1//RAB3A//RILPL2//SCN1B//SDC2//SEMA6C//SEMA7A//SH3KBP1//SHANK3//SLC1A3//SLC9A3R1//SPON2//SRCIN1//STC…
GO:0051656	establishment_of_organelle_localization	Biological Process	52	412	1492	18342	0.00101276	0.014991	2.9945	1.55162	0.0348525	AP1AR//ARL6//C2CD4C//CCNB1//CDK5//CENPA//CEP19//CNIH2//DLGAP5//DNM1//ESPL1//FAM83D//GEM//GPSM2//HAP1//HIF1A//KIF3A//KIF3C//MAPT//MREG//NECTIN2//NR4A3//NSF//NTN1//PLA2G3//PPP6R1//PREB//PSRC1//RAB17//RAB3A//RIMS3//RIMS4//SAPCD2//SEPT5//SERPINA1//SHROOM2//SLC9A3R1//SNCA//SNPH//STX1A//SUN2//SYT12//SYT7//SYTL2//SYTL4//TC2N//TMED9//TRAPPC5//UBB//UNC13A//XPO1//YKT6
GO:0042267	natural_killer_cell_mediated_cytotoxicity	Biological Process	8	27	1492	18342	0.0010257	0.0151497	2.98898	3.64254	0.00536193	LYST//MICA//MICB//PRDX1//RAET1G//RAET1L//ULBP2//ULBP3
GO:0055082	cellular_chemical_homeostasis	Biological Process	81	707	1492	18342	0.00103079	0.0151918	2.98683	1.40846	0.0542895	ABCC2//ADRA1B//ANXA6//APP//ATP1A1//ATP1A3//ATP1B1//ATP1B2//ATP1B3//ATP2A3//ATP6V0A1//ATP6V0B//ATP6V0C//ATP6V0D1//ATP6V0E1//ATP6V1A//ATP7A//BAK1//BCAP31//BDKRB2//BMP6//CALB1//CALB2//CAV1//CCRL2//CD52//CEMIP//CIB2//CKB//CXCR4//EDN1//F2RL1//FKBP1B//FOXO1//GATA2//GPR17//GPR4//HAP1//HIF1A//HK1//HMOX1//IRS2//ITGAV//JPH3//KCNK3//KCTD17//LCK//MCOLN1//MICU1//MT1B//MT1F//MT1X//NPTN//NTSR1//PDK3//PPARGC1A//…
GO:1902903	regulation_of_supramolecular_fiber_organization	Biological Process	45	344	1492	18342	0.00103634	0.0152407	2.9845	1.60817	0.0301609	ADD3//AP1AR//APC//APP//ARHGAP40//C15orf38-AP3S2//C15orf62//C16orf45//CAMSAP3//CARMIL1//CCL26//CDC42EP2//CDC42EP4//CDC42EP5//CFL1//CLU//EDN1//F2RL1//FES//GMFG//GSN//HSPA1A//HSPA1B//IQGAP2//LDLR//MAP1A//MAPT//MTPN//PSRC1//PTGER4//RANGRF//RAPGEF3//RGS2//S1PR1//SH3PXD2B//SHANK3//SLC9A1//SNCA//TMOD1//TMOD2//TMOD3//TMSB4X//VASP//WASF1//WNT11
GO:0031214	biomineral_tissue_development	Biological Process	15	76	1492	18342	0.00104847	0.0153527	2.97944	2.42636	0.0100536	AXIN2//CNNM4//COL1A1//ECM1//FOXO1//MINPP1//MMP13//MSX2//NECTIN1//PHOSPHO1//PTGS2//PTHLH//SPP1//SRGN//WNT11
GO:0043407	negative_regulation_of_MAP_kinase_activity	Biological Process	15	76	1492	18342	0.00104847	0.0153527	2.97944	2.42636	0.0100536	BMP4//CAV1//DAB2IP//DNAJA1//DUSP10//DUSP14//DUSP6//DUSP9//HMGCR//HYAL2//MAPK8IP1//RGS14//RGS2//RGS3//SPRY4
GO:0046486	glycerolipid_metabolic_process	Biological Process	53	423	1492	18342	0.00107589	0.0156698	2.96823	1.54033	0.0355228	ABHD4//ABHD6//ACSL1//AGPAT2//ANG//BPNT1//CAV1//DBI//DGAT1//DGKZ//EREG//ETNK2//ETNPPL//FABP5//FGF18//FGF19//FGFR1//FGFR4//GDE1//GDPD3//HBEGF//INSIG1//IP6K2//IRS2//KITLG//KLB//LCK//LIPE//LIPH//LPCAT2//LPCAT3//LPCAT4//LPIN1//LPL//MFSD2A//MTMR2//NRG4//PGP//PHOSPHO1//PIGH//PIK3R3//PIP4K2A//PLA2G15//PLA2G3//PLA2G4A//PNPLA6//PTPN13//SERINC2//SERINC5//SLC44A3//SOCS1//SOCS5//STARD10
GO:0048667	cell_morphogenesis_involved_in_neuron_differentiation	Biological Process	53	423	1492	18342	0.00107589	0.0156698	2.96823	1.54033	0.0355228	APP//ARC//ARTN//B3GNT2//B4GAT1//BDNF//CDK5//CRMP1//CXCR4//DOCK10//DPYSL2//EFNA2//EFNA3//EFNA4//EFNA5//EFNB1//EFNB2//ENAH//EPHB3//HSP90AA1//ID2//IRS2//ISL2//KIF3A//LHX2//LRFN3//LRP4//MAP1A//NECTIN1//NEFH//NEO1//NGFR//NOG//NPTX1//NR4A3//NRP2//NTN1//RAB3A//SCN1B//SDC2//SEMA6C//SEMA7A//SH3KBP1//SHANK3//SLC1A3//SLC9A3R1//SPON2//STXBP1//UNC5B//VASP//VEGFA//WHRN//WNT5A
GO:0060576	intestinal_epithelial_cell_development	Biological Process	5	11	1492	18342	0.00107703	0.0156698	2.96777	5.58798	0.00335121	HIF1A//KLF5//NKX3-2//PRDM1//TIGAR
GO:0060351	cartilage_development_involved_in_endochondral_bone_morphogenesis	Biological Process	10	40	1492	18342	0.00108425	0.0157413	2.96487	3.07339	0.00670241	AXIN2//COL1A1//COL21A1//COL6A2//HOXA11//MATN3//MMP13//RARB//SOX9//STC1
GO:0043112	receptor_metabolic_process	Biological Process	18	100	1492	18342	0.00108763	0.0157568	2.96352	2.21284	0.0120643	AP2S1//ARRB1//ARRB2//CAV1//CD81//CD9//CDK5//CEACAM1//CXCL8//DNM1//FUT8//LRP1//MYLIP//PPARG//REP15//SNCA//TGFB1//TNF
GO:0043392	negative_regulation_of_DNA_binding	Biological Process	12	54	1492	18342	0.00110604	0.0159425	2.95623	2.7319	0.0080429	HMOX1//ID2//JUN//KDM1A//LHX2//MAD2L2//MSX1//MSX2//NEK2//NFKBIA//TMSB4X//WFIKKN1
GO:0071398	cellular_response_to_fatty_acid	Biological Process	12	54	1492	18342	0.00110604	0.0159425	2.95623	2.7319	0.0080429	AKR1C2//AKR1C3//CCNB1//EDN1//LDLR//PDK3//PDK4//PID1//PPARG//PPARGC1A//PTGER2//PTGER4
GO:0008277	regulation_of_G-protein_coupled_receptor_protein_signaling_pathway	Biological Process	23	142	1492	18342	0.00110747	0.0159425	2.95567	1.99121	0.0154155	ABHD6//ACPP//ADRB2//APLP1//ARRB1//ARRB2//CRY1//CXCL8//DNM1//EDN1//GNG4//GRK5//PALM//PDCL//PPEF1//PPP1R9B//RGS14//RGS16//RGS2//RGS3//RGS9//SNCA//TMOD2
GO:0008406	gonad_development	Biological Process	30	204	1492	18342	0.0011118	0.015971	2.95397	1.80788	0.0201072	ADAMTS1//ADGRG1//AKR1C3//ANG//ARID5B//ARRB1//ARRB2//CEBPB//COL9A3//CTSV//EREG//FZD4//HOXA11//IDH1//INHBB//KITLG//LFNG//MAMLD1//MMP14//NKX3-1//PRDX4//RDH10//SOX15//SOX9//TEX19//TFAP2C//TGFB2//VEGFA//VGF//WNT5A
GO:0030224	monocyte_differentiation	Biological Process	6	16	1492	18342	0.00112474	0.016089	2.94895	4.61009	0.00402145	BMP4//CSF2//IL31RA//JUN//PPARG//VEGFA
GO:0060192	negative_regulation_of_lipase_activity	Biological Process	6	16	1492	18342	0.00112474	0.016089	2.94895	4.61009	0.00402145	ANGPTL4//ANXA1//PLA2R1//POR//RGS2//SORT1
GO:0006915	apoptotic_process	Biological Process	100	910	1492	18342	0.00115749	0.0165227	2.93648	1.35094	0.0670241	ADORA1//ANXA6//APLP1//APP//ARL6IP1//ARRB1//ATG5//BAG3//BAK1//BCAP31//BCL10//BCL2L12//BMF//BMP4//BRMS1//CARD6//CAV1//CD14//CD70//CDK5//CEBPB//CLU//CSRNP1//CTSL//CXCR4//CYR61//DAB2IP//DEDD2//DHCR24//DIO3//DPF1//DRAM1//DYNLL1//EFNA5//EGLN3//ELMO2//ESPL1//EVA1A//FADD//FAM32A//FOXO1//GRAMD4//GRK5//GSN//HMOX1//IER3//ITGAV//JUN//KRT18//KRT8//LGALS7//LIG4//MADD//MAL//MAP2K6//MAP3K10//MFSD10//MX1//NAIF1//…
GO:0030097	hemopoiesis	Biological Process	63	525	1492	18342	0.00117476	0.0167342	2.93005	1.47523	0.0422252	ANXA1//APP//ATG5//ATP11C//ATP7A//BAK1//BCL6//BMP4//CD79B//CDH17//CDKN2B//CEBPA//CSF2//DLL4//DOCK10//DOCK11//DYRK3//EBP//EFNA2//EFNA4//EGR1//F2RL1//FADD//FZD7//G6PD//GATA2//HIF1A//HOXB4//HYAL2//ID2//IL18R1//IL31RA//IL7R//JMJD6//JUN//KITLG//L3MBTL3//LCK//LFNG//LIG4//MAFB//MALT1//MEOX1//MMP9//PIP4K2A//PPARG//PRTN3//PTBP3//PTGER4//ROGDI//SOX4//STAT3//TGFB1//TGFB2//TGFBR3//THRA//TMOD3//TNF//VEGFA//WNT…
GO:0010594	regulation_of_endothelial_cell_migration	Biological Process	31	214	1492	18342	0.00119206	0.0169451	2.9237	1.78084	0.0207775	ANXA1//BCAR1//BMP4//CEACAM1//DAB2IP//DLL4//EDN1//EMP2//FGF18//FGFBP1//FGFR1//FOXC2//GATA2//HIF1A//HMOX1//HSPB1//ITGB3//MAP2K3//NRP2//PLK2//PLPP3//PPARG//PTGS2//RHOB//SPARC//STC1//TGFB1//TMSB4X//VEGFA//VEGFC//WNT5A
GO:0032368	regulation_of_lipid_transport	Biological Process	19	109	1492	18342	0.00119651	0.016973	2.92208	2.14292	0.0127346	ABCG1//ATP8A1//BMP6//CRY1//EDN1//GAL//IRS2//ITGAV//ITGB3//KDM5B//LRP1//MAP2K6//NFKBIA//NKX3-1//NTSR1//PLA2R1//PLTP//PPARG//SPP1
GO:0061136	regulation_of_proteasomal_protein_catabolic_process	Biological Process	27	178	1492	18342	0.00120644	0.0170783	2.91849	1.86475	0.0180965	AURKA//BCAP31//CAV1//CEBPA//CLU//DAB2IP//HSPA1A//HSPA1B//LAMP3//MAP1A//NKD2//PINK1//PLK1//PLK2//PRKCG//PSMC4//PSMD14//RNF14//RNF144B//RYBP//SDCBP//SOCS5//TRIB1//TRIB2//UBB//VCP//YOD1
GO:1901215	negative_regulation_of_neuron_death	Biological Process	28	187	1492	18342	0.00121143	0.0171133	2.9167	1.84075	0.0187668	ARRB1//ARRB2//BDNF//CCL2//CDK5//CEBPB//CNTFR//CPEB4//CRLF1//EN1//EN2//HIF1A//HMOX1//ILK//JUN//LIG4//LRP1//MAP3K12//NR4A3//PINK1//PPARGC1A//PRKCG//RETREG1//SNCA//STAT3//STXBP1//TIGAR//UNC5B
GO:0030030	cell_projection_organization	Biological Process	121	1137	1492	18342	0.00121801	0.0171706	2.91435	1.30829	0.0810992	APP//ARC//ARL6//ARTN//ATP1A3//ATP6V0D1//ATP7A//AURKA//B3GNT2//B4GAT1//BBS9//BDNF//BICDL1//CAMSAP3//CARMIL1//CBX6//CCDC28B//CDK5//CEP19//CRMP1//CXCR4//DAB2IP//DBNDD1//DNAAF3//DOCK10//DPYSL2//DYNLL1//EFHD1//EFNA2//EFNA3//EFNA4//EFNA5//EFNB1//EFNB2//EHD1//EMP2//ENAH//EPHB3//FSCN1//GFY//GPRIN1//GSN//HAP1//HSP90AA1//IFT46//ILK//IRS2//ISL2//ITGA1//JUN//KCTD17//KIF3A//KIF3C//KLF5//LHX2//LRFN3//LRP4//LRR…
GO:0045892	negative_regulation_of_transcription,_DNA-templated	Biological Process	130	1235	1492	18342	0.00122734	0.0172664	2.91104	1.29406	0.0871314	ARID5B//ARNTL//BAG3//BCL6//BHLHE41//BMP4//BMP6//BRMS1//C11orf95//CAV1//CBX6//CCND3//CDK5//CDKN1C//CEBPA//CEBPB//CIC//CREB3L1//CREM//CRY1//CSF2//DAB2IP//DEDD2//DLL4//DLX2//DLX4//DNAJB1//DNAJB4//DPF1//EDN1//EGR1//ELF3//EN1//EREG//ETV3//FGFR1//FOSB//FOXC2//FOXF1//FOXO1//FOXO6//FOXQ1//GATA2//HES2//HEXIM1//HIST1H1C//HOXB13//HOXB4//HOXD8//HSBP1//HSPA1A//ID2//IGF2//IRF2BP1//IRF2BPL//JUN//KDM1A//KDM5B//K…
GO:0002028	regulation_of_sodium_ion_transport	Biological Process	16	85	1492	18342	0.00123427	0.0173282	2.90859	2.31408	0.0107239	ADRB2//ATP1A1//ATP1B1//ATP1B2//ATP1B3//FXYD1//FXYD2//GLRX//PRSS8//RANGRF//SCN1B//SERPINE2//SLC9A1//SLC9A3R1//TESC//TGFB1
GO:0060753	regulation_of_mast_cell_chemotaxis	Biological Process	4	7	1492	18342	0.001249	0.0174824	2.90344	7.02489	0.00268097	PGF//RAC2//VEGFA//VEGFC
GO:0051090	regulation_of_DNA_binding_transcription_factor_activity	Biological Process	51	406	1492	18342	0.00125039	0.0174824	2.90295	1.54427	0.0341823	APP//ARID5B//ARRB1//ARRB2//BCL10//BRMS1//CAMK1D//CHUK//CLU//DAB2IP//DDX58//EDN1//FOS//FZD4//HAVCR2//HMOX1//HSPA1A//HSPA1B//ID2//JUN//KDM1A//MAD2L2//MALT1//MAP3K10//MID2//MSX2//MTPN//NFKBIA//PELI1//PINK1//PLPP3//PPARG//PPARGC1A//PPP2R5B//RNF2//RNF25//SGK1//SIGIRR//TGFB1//THRA//TLR4//TMSB4X//TNF//TRIB1//TRIM15//TRIM31//TRIM5//TRIM62//UBB//VEGFA//WNT5A
GO:0030029	actin_filament-based_process	Biological Process	66	557	1492	18342	0.00125854	0.0175603	2.90013	1.45669	0.0442359	ADD3//ANG//ANXA1//AQP1//ARRB1//ATP1A1//BCAR1//BCL6//CACNA1G//CAP1//CARMIL1//CDC42EP2//CDK5//CFL1//CNN3//DBN1//DES//EMP2//FAT1//FRMD3//FSCN1//GAS2L3//GMFG//GSN//IQGAP2//KCNH2//KLHL41//KRT19//KRT8//MAD2L2//MKLN1//MSRB1//MYLIP//PAK4//PAK6//PPP1R9B//RAC2//RALA//RFLNB//RHOB//RHOC//RHOU//RHOV//RND1//RND2//S1PR1//S1PR2//SCN1B//SDCBP//SHROOM2//SLC9A1//SLC9A3R1//SORBS1//SUN2//TESK2//TMOD1//TMOD2//TMOD3//T…
GO:0010952	positive_regulation_of_peptidase_activity	Biological Process	28	188	1492	18342	0.00131557	0.0183185	2.88089	1.83096	0.0187668	ADRM1//APP//ARRB1//BAK1//BCAP31//BCL10//CAV1//CYR61//EFNA3//EGLN3//FADD//FBLN1//GRAMD4//GSN//LCK//MAL//MAPT//MMP14//NGFR//NKX3-1//PINK1//PPARG//PSMD14//SNCA//STAT3//TBC1D10A//TNF//VCP
GO:0003170	heart_valve_development	Biological Process	10	41	1492	18342	0.00133094	0.0184569	2.87584	2.99843	0.00670241	ACVR1//BMP4//CYR61//OLFM1//PRDM1//SMAD6//SOX4//SOX9//TGFB1//TGFB2
GO:0042269	regulation_of_natural_killer_cell_mediated_cytotoxicity	Biological Process	10	41	1492	18342	0.00133094	0.0184569	2.87584	2.99843	0.00670241	ARRB2//CEACAM1//HAVCR2//MICA//MICB//NECTIN2//RAET1G//RAET1L//ULBP2//ULBP3
GO:0006836	neurotransmitter_transport	Biological Process	27	180	1492	18342	0.00142807	0.0197636	2.84525	1.84403	0.0180965	AQP1//C2CD4C//CDK5//CSF2//EDN1//GLUL//LIN7C//NTSR1//RAB3A//RIMS3//RIMS4//SEPT5//SLC1A1//SLC1A3//SLC36A1//SLC44A3//SLC6A12//SNCA//SNPH//STX1A//STXBP1//SYT12//SYT7//SYTL2//SYTL4//TC2N//UNC13A
GO:0032787	monocarboxylic_acid_metabolic_process	Biological Process	60	499	1492	18342	0.00144819	0.0200015	2.83917	1.47818	0.0402145	ABCC2//ACOT7//ACSL1//ACSS2//ADIPOR2//AKR1C1//AKR1C2//AKR1C3//ALDOC//ALOX12B//BSG//BTD//CES1//CRABP2//CREM//CYP1A1//CYP26B1//CYP2S1//DCXR//DHRS9//EDN1//ELOVL3//ENO3//FASN//GSTM4//HIF1A//HK1//HPGD//IDH1//LDHA//LIPE//LPIN1//LPL//ME1//MPC1//MSMO1//NDUFAB1//NR4A3//PC//PGAM1//PGM2L1//PKM//PLA2G15//PLA2G3//PLA2G4A//POR//PPARG//PPARGC1A//PRKAR2B//PTGR1//PTGS1//PTGS2//RDH10//SCD//SCD5//SCPEP1//SLC1A3//SLC…
GO:0043410	positive_regulation_of_MAPK_cascade	Biological Process	65	551	1492	18342	0.0015243	0.02101	2.81693	1.45024	0.0435657	ADORA1//ADRA1B//ADRA2B//ADRB2//ALOX12B//APP//ARRB1//ARRB2//BMP4//CCL2//CCL26//CD81//CDON//CRKL//CXCR4//DAB2IP//DIRAS1//DUSP6//DUSP9//EDN1//EPHB3//EPHB4//F2RL1//FFAR4//FGF18//FGF19//FGFR1//FGFR4//FZD10//FZD4//FZD7//GAREM1//GCNT2//HAVCR2//HMGCR//IGF2//IGFBP4//ILK//ITGA1//ITGAV//JUN//KLB//MADD//MAP2K3//MAP2K6//MAP3K10//MAP3K12//MAP3K8//MAPK8IP1//MAPKAPK2//NGFR//NPTN//S1PR2//SDCBP//SEMA7A//TGFB1//TGF…
GO:0030324	lung_development	Biological Process	25	163	1492	18342	0.00153462	0.0211075	2.814	1.88552	0.016756	ATP7A//BMP4//CEBPA//CIC//CRISPLD2//DHCR7//ERRFI1//FGF18//FGFR1//FOXF1//HS6ST1//JMJD6//LIPA//LOX//MMP14//NOG//RAB3A//RDH10//SOX9//SPARC//THRA//VEGFA//WNT11//WNT5A//WNT7B
GO:0002720	positive_regulation_of_cytokine_production_involved_in_immune_response	Biological Process	9	35	1492	18342	0.00154067	0.0211075	2.81229	3.1612	0.00603217	BCL10//F2RL1//GPRC5B//MALT1//NR4A3//RAET1G//SEMA7A//SPON2//WNT5A
GO:0040036	regulation_of_fibroblast_growth_factor_receptor_signaling_pathway	Biological Process	9	35	1492	18342	0.00154067	0.0211075	2.81229	3.1612	0.00603217	CREB3L1//DUSP6//FGFBP1//NOG//NPTN//SHISA2//SPRY4//SULF2//WNT5A
GO:0035967	cellular_response_to_topologically_incorrect_protein	Biological Process	22	137	1492	18342	0.0015738	0.021475	2.80305	1.97415	0.0147453	ATP6V0D1//CCL2//CREB3//CREB3L1//CREB3L3//CXCL8//CXXC1//DNAJB11//EXTL2//FKBP14//HSPA1A//HSPA1B//HSPA1L//PPP2R5B//PREB//SDF2L1//TATDN2//TSPYL2//UFD1//VCP//YOD1//ZBTB17
GO:0045807	positive_regulation_of_endocytosis	Biological Process	22	137	1492	18342	0.0015738	0.021475	2.80305	1.97415	0.0147453	ARRB1//ARRB2//CAMK1D//CCL2//CD14//CD63//CLU//DNM1//F2RL1//GATA2//ITGA2//ITGAV//LDLR//LRP1//MFGE8//PPARG//PTX3//SNCA//TNF//TSPAN1//VEGFA//WNT5A
GO:0006811	ion_transport	Biological Process	140	1353	1492	18342	0.00157892	0.0215018	2.80164	1.27206	0.0938338	ABCC2//ABCC5//ABCG1//ACSL1//AKR1C1//ANO10//ANXA1//ANXA6//AQP1//ASIC1//ATP11C//ATP1A1//ATP1A3//ATP1B1//ATP1B2//ATP1B3//ATP2A3//ATP6V0A1//ATP6V0B//ATP6V0C//ATP6V0D1//ATP6V0E1//ATP6V1A//ATP7A//ATP8A1//ATP8B2//ATP8B3//AZIN2//BAK1//BDKRB2//BSG//CA12//CA5B//CACNA1G//CACNA1H//CALHM2//CALHM3//CAMK2G//CAV1//CDK5//CEACAM1//CNNM4//COX6A1//CSF2//CYB5A//EDN1//FKBP1B//FXYD1//FXYD2//GLS//HBA1//HCN2//IP6K2//ITGA…
GO:0006518	peptide_metabolic_process	Biological Process	421	4582	1492	18342	0.00159173	0.0215672	2.79813	1.12955	0.282172	AARS2//ABCF1//ABCG1//ABHD17C//ABTB2//ACTR5//ACVR1//ADAM22//ADAMTS1//ADAMTS15//ADAMTS4//ADAMTS5//ADRB2//ADRM1//ALOX12B//AMN1//ANAPC11//ANXA1//AP2S1//APC//APOL2//APP//ARID5B//ARNTL//ARRB1//ARRB2//ARTN//ASB6//ASPHD2//ATG4A//ATG5//ATP7A//ATXN7L3//AURKA//B3GLCT//B3GNT2//B3GNT7//B4GALT5//B4GAT1//BAK1//BCL10//BMP4//BRMS1//BTG1//C4BPA//CALB1//CAMK1D//CAMK2G//CAPN5//CBLB//CCDC126//CCL2//CCNB1//CCNB3//CCND…
GO:0034620	cellular_response_to_unfolded_protein	Biological Process	20	120	1492	18342	0.00159197	0.0215672	2.79807	2.04893	0.0134048	ATP6V0D1//CCL2//CREB3//CREB3L1//CREB3L3//CXCL8//CXXC1//DNAJB11//EXTL2//FKBP14//HSPA1A//HSPA1B//HSPA1L//PPP2R5B//PREB//TATDN2//TSPYL2//VCP//YOD1//ZBTB17
GO:0032436	positive_regulation_of_proteasomal_ubiquitin-dependent_protein_catabolic_process	Biological Process	16	87	1492	18342	0.00159323	0.0215672	2.79772	2.26089	0.0107239	AURKA//BCAP31//CAV1//CEBPA//CLU//HSPA1A//HSPA1B//NKD2//PLK1//PLK2//RNF14//RNF144B//SOCS5//TRIB1//TRIB2//VCP
GO:0009409	response_to_cold	Biological Process	11	49	1492	18342	0.00161346	0.0217978	2.79224	2.75978	0.00737265	ADRB2//FOS//FOXO1//HSP90AA1//LPL//NFKBIA//PPARG//PPARGC1A//SLC9A1//THRA//VGF
GO:0009952	anterior|posterior_pattern_specification	Biological Process	30	209	1492	18342	0.00163903	0.0220993	2.78541	1.76463	0.0201072	ARC//AURKA//AXIN2//BHLHE41//BMP4//CDON//CRKL//EN1//FOXC2//FOXF1//GDF11//HES2//HOXA11//HOXB4//HOXC10//HOXC11//HOXC13//HOXC6//HOXD8//KAT2A//LFNG//MEOX1//MSX1//MSX2//NKX3-1//NOG//POGLUT1//RNF2//TBX3//WNT5A
GO:0030855	epithelial_cell_differentiation	Biological Process	75	656	1492	18342	0.0016457	0.0221453	2.78365	1.40551	0.0502681	ACVR1//AKR1C1//AKR1C2//AKR1C3//ALDOC//ANXA1//BMP4//BMP6//CAMSAP3//CEBPB//CES1//CNN3//COL4A1//CTSV//CYP1A1//CYP26B1//DHRS9//DLX3//EHF//ELF3//EREG//F2RL1//FGFR1//FOXC2//FOXF1//FURIN//FZD7//GATA5//GPR4//GSTM3//HIF1A//HOXB13//ID2//IL31RA//ITGA2//JUN//KDM5B//KLF5//KRT14//KRT16//KRT18//KRT19//KRT3//KRT8//KRT81//KRT86//MSN//NKX3-2//PELO//PI3//PPARG//PRDM1//PRSS8//PTPRS//RAPGEF3//RARB//RILPL2//S1PR1//SLC…
GO:0071560	cellular_response_to_transforming_growth_factor_beta_stimulus	Biological Process	24	155	1492	18342	0.00165341	0.0222053	2.78162	1.90352	0.0160858	ACVR1//ARRB2//CAV1//CDH5//CGN//COL1A1//COL3A1//EDN1//FOS//FURIN//FUT8//GCNT2//HPGD//HYAL2//JUN//PPARGC1A//SMAD6//SOX9//TGFB1//TGFB2//TGFBR3//UBB//WNT5A//ZFP36L2
GO:0060560	developmental_growth_involved_in_morphogenesis	Biological Process	19	112	1492	18342	0.00166526	0.0223203	2.77852	2.08552	0.0127346	APP//AURKA//BDNF//BMP4//CDK5//EFNA5//HSP90AA1//KDM5B//LHX2//NRP2//RDH10//S1PR1//SEMA7A//SOX9//TGFB1//WASF1//WNT11//WNT5A//WNT7B
GO:0070507	regulation_of_microtubule_cytoskeleton_organization	Biological Process	27	182	1492	18342	0.00168396	0.0224825	2.77367	1.82377	0.0180965	APC//AURKA//C16orf45//CAMSAP3//CCNF//CHORDC1//DIXDC1//EFNA5//FES//FSD1//GPSM2//HSPA1A//HSPA1B//KAT2A//MAP1A//MAPRE2//MAPT//NEK2//PLK1//PLK2//PSRC1//RANBP3L//RANGRF//RBM14//RGS2//SNCA//XPO1
GO:1903531	negative_regulation_of_secretion_by_cell	Biological Process	27	182	1492	18342	0.00168396	0.0224825	2.77367	1.82377	0.0180965	ADORA1//ADRA2B//ANXA1//ARG2//ASIC1//CEACAM1//CRY1//EDN1//F2RL1//FFAR4//FKBP1B//FOXF1//HMGCR//HMOX1//IL13RA2//IL1R2//INHBB//PTGER4//SIRT4//SLC30A1//SNCA//SRCIN1//SRGN//SYTL4//TMSB4X//TNF//TNFRSF9
GO:1902680	positive_regulation_of_RNA_biosynthetic_process	Biological Process	163	1610	1492	18342	0.00169143	0.0225381	2.77175	1.24463	0.109249	ACVR1//ADRB2//AFAP1L2//APP//ARID3B//ARID5B//ARNT2//ARNTL//ARRB1//ATXN7L3//BAMBI//BCL10//BCL2L12//BMP4//BMP6//CASZ1//CCPG1//CD81//CDK9//CDKN1C//CDKN2B//CDON//CEBPA//CEBPB//CGA//CHUK//CKS2//COL1A1//CREB3//CREB3L1//CREB3L3//CREM//CSRNP1//CXXC1//CYR61//DAB2IP//DDN//DDX58//DLGAP5//DLX2//DLX3//DPF1//EDN1//EGR1//EGR3//EHF//ELF3//EN1//EN2//ETV4//F2RL1//FADD//FOS//FOSB//FOXC2//FOXD2//FOXF1//FOXF2//FOXN2//…
GO:0002228	natural_killer_cell_mediated_immunity	Biological Process	8	29	1492	18342	0.00171332	0.0226525	2.76616	3.39133	0.00536193	LYST//MICA//MICB//PRDX1//RAET1G//RAET1L//ULBP2//ULBP3
GO:0003203	endocardial_cushion_morphogenesis	Biological Process	8	29	1492	18342	0.00171332	0.0226525	2.76616	3.39133	0.00536193	ACVR1//BMP4//MSX1//MSX2//NOG//SNAI1//SOX9//TGFB2
GO:0007176	regulation_of_epidermal_growth_factor-activated_receptor_activity	Biological Process	8	29	1492	18342	0.00171332	0.0226525	2.76616	3.39133	0.00536193	ADORA1//ADRA2B//APP//CBLB//EREG//ERRFI1//NEURL1//SOCS5
GO:1902803	regulation_of_synaptic_vesicle_transport	Biological Process	8	29	1492	18342	0.00171332	0.0226525	2.76616	3.39133	0.00536193	CNIH2//PINK1//RAB3A//RIMS3//RIMS4//SEPT5//STX1A//STXBP1
GO:0030656	regulation_of_vitamin_metabolic_process	Biological Process	5	12	1492	18342	0.00172314	0.0226941	2.76368	5.12232	0.00335121	AKR1C3//CD320//SNAI1//TNF//VDR
GO:0051798	positive_regulation_of_hair_follicle_development	Biological Process	5	12	1492	18342	0.00172314	0.0226941	2.76368	5.12232	0.00335121	GAL//MSX2//TGFB2//TNF//WNT5A
GO:0043270	positive_regulation_of_ion_transport	Biological Process	34	247	1492	18342	0.00173374	0.0227896	2.76102	1.69223	0.0227882	ADORA1//ADRB2//ARC//ARL6IP1//ARRB2//ATP1B1//ATP1B2//ATP1B3//ATP8A1//BAK1//CAV1//CCL2//CEMIP//EDN1//FHL1//FXYD1//G6PD//GAL//GLRX//HAP1//KCNH2//MAP2K6//NTSR1//PINK1//PLA2R1//PRSS8//SCN1B//SHANK3//SLC9A1//SNCA//STC1//STXBP1//TESC//TMSB4X
GO:0070555	response_to_interleukin-1	Biological Process	23	147	1492	18342	0.00177661	0.0232329	2.75041	1.92348	0.0154155	ABCC2//ANXA1//CCL2//CCL26//CEBPB//CHUK//CXCL8//DAB2IP//EDN1//EGR1//GBP2//HIF1A//HYAL2//IL1R1//IL1R2//MAP3K8//MTHFR//NFKBIA//NKX3-1//PELI1//SNCA//SOX9//UBB
GO:0090312	positive_regulation_of_protein_deacetylation	Biological Process	7	23	1492	18342	0.00177925	0.0232329	2.74976	3.74152	0.00469169	BCL6//BRMS1//PINK1//SDR16C5//TGFB1//VEGFA//ZBTB7B
GO:0002520	immune_system_development	Biological Process	70	606	1492	18342	0.0017799	0.0232329	2.7496	1.42005	0.0469169	ANXA1//APP//ARTN//ATG5//ATP11C//ATP7A//BAK1//BCL6//BMP4//CD79B//CDH17//CDKN2B//CEBPA//CRKL//CSF2//DLL4//DOCK10//DOCK11//DYRK3//EBP//EFNA2//EFNA4//EGR1//EPHB3//F2RL1//FADD//FOXL1//FZD7//G6PD//GATA2//HAVCR2//HIF1A//HOXB4//HYAL2//ID2//IL18R1//IL31RA//IL7R//JMJD6//JUN//KITLG//L3MBTL3//LCK//LFNG//LIG4//MAFB//MALT1//MEOX1//MMP9//NKX3-2//PIP4K2A//PPARG//PRTN3//PTBP3//PTGER4//RBM15//ROGDI//SOX4//STAT3//T…
GO:0003007	heart_morphogenesis	Biological Process	33	238	1492	18342	0.00178111	0.0232329	2.74931	1.70457	0.022118	ACVR1//ADAMTS1//AXIN2//BMP4//CPE//CYR61//DLL4//EPHB4//FOXC2//FOXF1//HIF1A//ID2//ILK//JUN//MSX1//MSX2//NOG//NRP2//OLFM1//RARB//RBM15//S1PR1//SMAD6//SNAI1//SOX4//SOX9//TBX3//TGFB1//TGFB2//TGFBR3//VEGFA//WNT11//WNT5A
GO:0031334	positive_regulation_of_protein_complex_assembly	Biological Process	35	257	1492	18342	0.00180125	0.0233429	2.74443	1.67422	0.0234584	BMF//C15orf62//CARMIL1//CCL26//CDC42EP2//CDC42EP4//CDC42EP5//CDH17//CLU//CSF2//FES//FSCN1//GSN//GTF2B//HSP90AA1//HSPA1A//HSPA1B//IQGAP2//JUN//MAPT//MSN//PINK1//PPP2R5B//PSMC4//PSRC1//RGS2//RHOC//TGFB1//TLR4//TNF//TPPP//VASP//VCP//VEGFA//WASF1
GO:0031647	regulation_of_protein_stability	Biological Process	35	257	1492	18342	0.00180125	0.0233429	2.74443	1.67422	0.0234584	ATP1B1//ATP1B2//ATP1B3//AURKA//BAG3//CD81//CLU//CMTM6//FKBPL//GOLGA7//GSN//HSP90AA1//HSPA1A//HSPA1B//IFT46//ISOC2//KAT2A//MORC3//MSX1//MYLIP//NAPG//P3H1//PIM2//PINK1//PLK1//PLPP3//PPARGC1A//RNF139//SNCA//SOX4//STXBP1//TESC//TSPAN1//USP18//USP2
GO:0048013	ephrin_receptor_signaling_pathway	Biological Process	15	80	1492	18342	0.00180266	0.0233429	2.74409	2.30504	0.0100536	AP2S1//DNM1//EFNA2//EFNA3//EFNA4//EFNA5//EFNB1//EFNB2//EPHB3//EPHB4//MMP2//MMP9//SDC2//SDCBP//VAV3
GO:1901184	regulation_of_ERBB_signaling_pathway	Biological Process	16	88	1492	18342	0.00180325	0.0233429	2.74394	2.23519	0.0107239	ADORA1//ADRA2B//AFAP1L2//APP//CBLB//CEACAM1//DAB2IP//EREG//ERRFI1//HAP1//ITGA1//MMP9//MVB12A//NEURL1//SH3KBP1//SOCS5
GO:0002684	positive_regulation_of_immune_system_process	Biological Process	112	1052	1492	18342	0.00180785	0.0233579	2.74284	1.30882	0.075067	ANXA1//APP//AQP3//ATP11C//BCAR1//BCL10//BCL6//BTN2A1//C4BPA//CAMK1D//CAV1//CCL2//CD101//CD14//CD320//CD79B//CD81//CD83//CHUK//CLU//CREB3//CXCL14//CXCL8//DDX58//DUSP10//EDN1//EFNB1//EGR3//ELMO2//EREG//F2RL1//FADD//FAM19A3//FES//FOS//FOXF1//FYB1//GATA2//GPRC5B//GPSM3//HAVCR2//HEXIM1//HIF1A//HLA-A//HLA-B//HLX//HMOX1//HSP90AA1//HSPA1A//HSPA1B//HSPH1//ID2//IGF2//IL13RA2//IL1R1//IL1RL1//IL27RA//IL7R//I…
GO:0006813	potassium_ion_transport	Biological Process	27	183	1492	18342	0.00182606	0.0235485	2.73849	1.8138	0.0180965	AQP1//ATP1A1//ATP1A3//ATP1B1//ATP1B2//ATP1B3//FXYD1//FXYD2//HCN2//KCND1//KCNH2//KCNH3//KCNH4//KCNJ4//KCNK3//KCNK5//KCNMB4//NSF//SLC12A2//SLC12A6//SLC12A8//SLC1A3//SLC9A1//SLC9A2//SLC9A5//SLC9A9//TMEM38A
GO:0042476	odontogenesis	Biological Process	19	113	1492	18342	0.00185256	0.0238452	2.73223	2.06706	0.0127346	ADAMTS5//AQP1//AQP3//AXIN2//BMP4//BSG//CNNM4//COL1A1//DLX2//DLX3//FOXO1//HTRA1//LRP4//MSX1//MSX2//NECTIN1//ROGDI//TGFB2//WNT6
GO:0032886	regulation_of_microtubule-based_process	Biological Process	30	211	1492	18342	0.00190375	0.0243754	2.72039	1.7479	0.0201072	APC//AURKA//C16orf45//CAMSAP3//CCNF//CHORDC1//CNIH2//DIXDC1//EFNA5//FES//FSD1//GPSM2//HAP1//HSPA1A//HSPA1B//KAT2A//MAP1A//MAPRE2//MAPT//NEFH//NEK2//PLK1//PLK2//PSRC1//RANBP3L//RANGRF//RBM14//RGS2//SNCA//XPO1
GO:0050920	regulation_of_chemotaxis	Biological Process	30	211	1492	18342	0.00190375	0.0243754	2.72039	1.7479	0.0201072	ARTN//CAMK1D//CCL2//CCL26//CREB3//CXCL14//CXCL8//CXCR4//EDN1//EFNB2//F2RL1//FGF18//FGFR1//GPSM3//HSPB1//ITGA2//PGF//RAC2//RARRES2//S100A14//S1PR1//SEMA6B//SEMA6C//SEMA7A//TGFB1//TMEM102//TMSB4X//VEGFA//VEGFC//WNT5A
GO:0006636	unsaturated_fatty_acid_biosynthetic_process	Biological Process	9	36	1492	18342	0.00190807	0.0243754	2.7194	3.07339	0.00603217	AKR1C3//ALOX12B//EDN1//ELOVL3//HPGD//PTGS1//PTGS2//SCD//SCD5
GO:0033572	transferrin_transport	Biological Process	9	36	1492	18342	0.00190807	0.0243754	2.7194	3.07339	0.00603217	ATP6V0A1//ATP6V0B//ATP6V0C//ATP6V0D1//ATP6V0E1//ATP6V1A//MCOLN1//REP15//STEAP3
GO:0030099	myeloid_cell_differentiation	Biological Process	29	202	1492	18342	0.00193534	0.0246774	2.71324	1.76492	0.019437	APP//BCL6//BMP4//CDKN2B//CEBPA//CSF2//DYRK3//EFNA2//EFNA4//F2RL1//G6PD//GATA2//ID2//IL31RA//JMJD6//JUN//L3MBTL3//MMP9//PIP4K2A//PPARG//PRTN3//PTBP3//TGFB1//TGFBR3//THRA//TMOD3//TNF//VEGFA//ZNF385A
GO:0030036	actin_cytoskeleton_organization	Biological Process	58	485	1492	18342	0.0019508	0.0248086	2.70979	1.47016	0.038874	ADD3//ANG//ANXA1//AQP1//ARRB1//BCAR1//BCL6//CAP1//CARMIL1//CDC42EP2//CDK5//CFL1//CNN3//DBN1//EMP2//FAT1//FRMD3//FSCN1//GAS2L3//GSN//IQGAP2//KLHL41//KRT19//KRT8//MAD2L2//MKLN1//MSRB1//MYLIP//PAK4//PAK6//PPP1R9B//RAC2//RALA//RFLNB//RHOB//RHOC//RHOU//RHOV//RND1//RND2//S1PR1//S1PR2//SDCBP//SHROOM2//SLC9A3R1//SORBS1//TESK2//TMOD1//TMOD2//TMOD3//TMSB4X//TNF//TNNT1//TNXB//TPM3//VASP//WASF1//WASF3
GO:0007498	mesoderm_development	Biological Process	20	122	1492	18342	0.00195291	0.0248086	2.70932	2.01534	0.0134048	ACVR1//BMP4//EXT2//FGFR1//FOXC2//FOXF1//GDF11//HOXA11//ITGA2//ITGB3//LHX2//NOG//NR4A3//POGLUT1//SNAI1//TBX3//TRIM15//VEGFA//WNT11//WNT5A
GO:0051650	establishment_of_vesicle_localization	Biological Process	32	230	1492	18342	0.00195964	0.0248207	2.70782	1.71041	0.0214477	AP1AR//ARL6//C2CD4C//CDK5//CEP19//CNIH2//DNM1//HAP1//KIF3A//MREG//NSF//PPP6R1//PREB//RAB17//RAB3A//RIMS3//RIMS4//SEPT5//SERPINA1//SHROOM2//SNCA//SNPH//STX1A//SYT12//SYT7//SYTL2//SYTL4//TC2N//TMED9//TRAPPC5//UNC13A//YKT6
GO:0060443	mammary_gland_morphogenesis	Biological Process	10	43	1492	18342	0.00196116	0.0248207	2.70749	2.85897	0.00670241	BMP4//CAV1//ELF3//KDM5B//MSX2//NTN1//TBX3//TGFB1//VDR//WNT5A
GO:0035725	sodium_ion_transmembrane_transport	Biological Process	25	166	1492	18342	0.00198575	0.0250853	2.70207	1.85144	0.016756	ASIC1//ATP1A1//ATP1A3//ATP1B1//ATP1B2//ATP1B3//CACNA1G//CACNA1H//CNNM4//FXYD2//HCN2//SCN1B//SHROOM2//SLC12A2//SLC1A1//SLC1A3//SLC4A11//SLC4A2//SLC5A3//SLC6A12//SLC9A1//SLC9A2//SLC9A5//SLC9A9//SLC9B2
GO:0051794	regulation_of_timing_of_catagen	Biological Process	3	4	1492	18342	0.00201808	0.0251139	2.69506	9.22017	0.00201072	GAL//MSX2//TGFB2
GO:0061030	epithelial_cell_differentiation_involved_in_mammary_gland_alveolus_development	Biological Process	3	4	1492	18342	0.00201808	0.0251139	2.69506	9.22017	0.00201072	FOXF1//HIF1A//ID2
GO:0070236	negative_regulation_of_activation-induced_cell_death_of_T_cells	Biological Process	3	4	1492	18342	0.00201808	0.0251139	2.69506	9.22017	0.00201072	FADD//TSC22D3//TSC22D4
GO:0070779	D-aspartate_import_across_plasma_membrane	Biological Process	3	4	1492	18342	0.00201808	0.0251139	2.69506	9.22017	0.00201072	NTSR1//SLC1A1//SLC1A3
GO:0071395	cellular_response_to_jasmonic_acid_stimulus	Biological Process	3	4	1492	18342	0.00201808	0.0251139	2.69506	9.22017	0.00201072	AKR1C1//AKR1C2//AKR1C3
GO:0071873	response_to_norepinephrine	Biological Process	3	4	1492	18342	0.00201808	0.0251139	2.69506	9.22017	0.00201072	APLP1//APP//PPARGC1A
GO:1903286	regulation_of_potassium_ion_import	Biological Process	3	4	1492	18342	0.00201808	0.0251139	2.69506	9.22017	0.00201072	ATP1B1//ATP1B2//ATP1B3
GO:0030003	cellular_cation_homeostasis	Biological Process	70	609	1492	18342	0.0020188	0.0251139	2.69491	1.41305	0.0469169	ADRA1B//ANXA6//APP//ATP1A1//ATP1A3//ATP1B1//ATP1B2//ATP1B3//ATP2A3//ATP6V0A1//ATP6V0B//ATP6V0C//ATP6V0D1//ATP6V0E1//ATP6V1A//ATP7A//BAK1//BCAP31//BDKRB2//BMP6//CALB1//CALB2//CAV1//CCRL2//CD52//CEMIP//CIB2//CXCR4//EDN1//F2RL1//FKBP1B//GATA2//GPR17//GPR4//HAP1//HIF1A//HMOX1//ITGAV//JPH3//KCNK3//KCTD17//LCK//MCOLN1//MICU1//MT1B//MT1F//MT1X//NPTN//NTSR1//PTGER2//PTGER4//RAB20//S1PR1//SCARA5//SLC30A1/…
GO:0016079	synaptic_vesicle_exocytosis	Biological Process	14	73	1492	18342	0.00202483	0.0251139	2.69361	2.35767	0.00938338	C2CD4C//CDK5//RAB3A//RIMS3//RIMS4//SEPT5//SNPH//STX1A//SYT12//SYT7//SYTL2//SYTL4//TC2N//UNC13A
GO:0050878	regulation_of_body_fluid_levels	Biological Process	59	496	1492	18342	0.00202812	0.0251139	2.69291	1.46234	0.0395442	ADORA1//ADRA2B//AKR1B1//ALOX12B//AQP1//AQP3//ARRB1//ARRB2//ATG5//ATP7A//CARMIL1//CAV1//CD9//CEACAM1//COL1A1//COL3A1//CYP26B1//DGKZ//DOCK11//EDN1//EHD1//EMP2//ENTPD2//F12//F2RL1//FBLN1//GATA2//GATA5//GGCX//GP1BB//HIF1A//HSPB1//HYAL2//ILK//ITGA2//ITGB3//KDM1A//KRT16//LCK//NEURL1//NFE2//NPR3//PRKAR2B//PRKCG//PROCR//PRTN3//SERPINA1//SERPINE2//SH2B2//SLC29A1//STXBP1//SYTL2//TLR4//VAV3//VDR//VEGFA//VKO…
GO:0019538	protein_metabolic_process	Biological Process	415	4526	1492	18342	0.00203581	0.0251139	2.69126	1.12723	0.27815	AARS2//ABCF1//ABCG1//ABHD17C//ABTB2//ACTR5//ACVR1//ADAM22//ADAMTS1//ADAMTS15//ADAMTS4//ADAMTS5//ADRB2//ADRM1//ALOX12B//AMN1//ANAPC11//ANXA1//AP2S1//APC//APOL2//APP//ARID5B//ARNTL//ARRB1//ARRB2//ARTN//ASB6//ASPHD2//ATG4A//ATG5//ATP7A//ATXN7L3//AURKA//B3GLCT//B3GNT2//B3GNT7//B4GALT5//B4GAT1//BAK1//BCL10//BMP4//BRMS1//BTG1//C4BPA//CALB1//CAMK1D//CAMK2G//CAPN5//CBLB//CCDC126//CCL2//CCNB1//CCNB3//CCND…
GO:0007229	integrin-mediated_signaling_pathway	Biological Process	16	89	1492	18342	0.00203596	0.0251139	2.69123	2.21008	0.0107239	ADAMTS1//BCAR1//CDH17//CEACAM1//COL3A1//FBLN1//FUT8//ILK//ITGA1//ITGA2//ITGA5//ITGA7//ITGAV//ITGB3//SEMA7A//VAV3
GO:0046545	development_of_primary_female_sexual_characteristics	Biological Process	16	89	1492	18342	0.00203596	0.0251139	2.69123	2.21008	0.0107239	ADAMTS1//ANG//ARID5B//ARRB1//ARRB2//CEBPB//COL9A3//EREG//FZD4//IDH1//INHBB//LFNG//LHFPL2//MMP14//VEGFA//VGF
GO:1903426	regulation_of_reactive_oxygen_species_biosynthetic_process	Biological Process	15	81	1492	18342	0.00204938	0.0252336	2.68838	2.27659	0.0100536	ARG2//CAV1//CLU//DDAH1//DDAH2//EDN1//GLA//HSP90AA1//PTGS2//PTX3//SNCA//STAT3//TLR4//TNF//ZNF205
GO:0033036	macromolecule_localization	Biological Process	229	2363	1492	18342	0.00206788	0.0254155	2.68447	1.19138	0.153485	ABCC2//ABCG1//ACSL1//ADORA1//AKAP5//AKR1C1//AKR1C3//ANKRD13C//ANKRD50//ANXA1//AP1AR//AP1S1//AP2S1//APOL2//ARC//ARL4C//ARL4D//ARL6//ARL6IP1//ARNTL//ARRB1//ARRB2//ATG4A//ATP11C//ATP1B1//ATP1B3//ATP6V0A1//ATP6V0B//ATP6V0C//ATP6V0D1//ATP6V0E1//ATP6V1A//ATP8A1//ATP8B2//ATP8B3//AURKA//AXIN2//B4GALNT1//BBS9//BCAP31//BCL6//BDKRB2//BMF//BMP4//BSG//C15orf38-AP3S2//CAMK2G//CAMSAP3//CAV1//CBLB//CD63//CD81//C…
GO:0045088	regulation_of_innate_immune_response	Biological Process	46	366	1492	18342	0.00208487	0.0255782	2.68092	1.54509	0.0308311	ARRB2//BCL10//CAV1//CD14//CEACAM1//CHUK//DAB2IP//DDX58//DUSP10//EREG//F2RL1//FADD//HAVCR2//HEXIM1//HSPA1A//HSPA1B//MALT1//MAP2K6//MAPKAPK2//MICA//MICB//MMP2//MUC13//MUC3A//NECTIN2//NFKBIA//PELI1//PPARG//PTPRS//RAET1G//RAET1L//RBM14//S100A14//SAMHD1//SH2D1B//SOCS1//TLR4//TRAFD1//TRIM15//TRIM5//UBB//UFD1//ULBP2//ULBP3//USP18//WNT5A
GO:1903507	negative_regulation_of_nucleic_acid-templated_transcription	Biological Process	133	1286	1492	18342	0.00209576	0.0256656	2.67866	1.27142	0.0891421	ARID5B//ARNTL//BAG3//BCL6//BHLHE41//BMP4//BMP6//BRMS1//C11orf95//CAV1//CBX6//CCND3//CDK5//CDKN1C//CEBPA//CEBPB//CIC//CREB3L1//CREM//CRY1//CSF2//DAB2IP//DEDD2//DLL4//DLX2//DLX4//DNAJB1//DNAJB4//DPF1//EDN1//EGR1//ELF3//EN1//EREG//ETV3//FGFR1//FOSB//FOXC2//FOXF1//FOXO1//FOXO6//FOXQ1//GATA2//HES2//HEXIM1//HIST1H1C//HOXB13//HOXB4//HOXC6//HOXD8//HSBP1//HSPA1A//ID2//IGF2//IRF2BP1//IRF2BPL//JUN//KDM1A//K…
GO:0007420	brain_development	Biological Process	79	704	1492	18342	0.00210182	0.0256935	2.6774	1.37953	0.0529491	ADGRG1//APP//AQP1//ARL6//ARNT2//ARRB2//ATP6V0D1//ATP7A//BAG3//BAK1//BMP4//C16orf45//CD9//CDK5//CDON//CIC//CKB//COL3A1//COL4A1//CXCR4//DAB2IP//DIXDC1//DLX2//DNAJB1//DPYSL2//DYNLL1//EFNA2//EN1//EN2//EPHB3//EPOR//FGFR1//FZD4//G6PD//GATA2//HAP1//HIF1A//HMX2//HMX3//ID2//INA//IRS2//KAT2A//KCNK3//KDM1A//LHX2//LRP1//MAFB//MFSD2A//MSX1//MTPN//NDRG2//NES//NEURL1//NOG//NOTCH3//NR4A3//NRGN//PPARGC1A//PTPRS//…
GO:0061564	axon_development	Biological Process	49	396	1492	18342	0.00210943	0.0257403	2.67584	1.52117	0.0328418	APP//ARTN//B3GNT2//B4GAT1//BDNF//CDK5//CRMP1//CXCR4//DPYSL2//EFNA2//EFNA3//EFNA4//EFNA5//EFNB1//EFNB2//ENAH//EPHB3//HSP90AA1//IRS2//ISL2//JUN//KIF3A//LHX2//LRFN3//MAP1A//MAPT//NECTIN1//NEFH//NEO1//NGFR//NOG//NPTX1//NR4A3//NRP2//NTN1//RAB3A//RTN4RL1//RTN4RL2//SCN1B//SEMA6C//SEMA7A//SH3KBP1//SHANK3//SPON2//STXBP1//UNC5B//VASP//VEGFA//WNT5A
GO:0009408	response_to_heat	Biological Process	18	106	1492	18342	0.00215262	0.0262203	2.66703	2.08759	0.0120643	ABCC2//BAG3//CD14//CLPB//DNAJA1//DNAJB4//HMOX1//HSBP1//HSP90AA1//HSPA1A//HSPA1B//HSPA1L//IER5//MAPT//MICA//MICB//PTGS2//SCARA5
GO:0030323	respiratory_tube_development	Biological Process	25	167	1492	18342	0.00215935	0.0262554	2.66568	1.84035	0.016756	ATP7A//BMP4//CEBPA//CIC//CRISPLD2//DHCR7//ERRFI1//FGF18//FGFR1//FOXF1//HS6ST1//JMJD6//LIPA//LOX//MMP14//NOG//RAB3A//RDH10//SOX9//SPARC//THRA//VEGFA//WNT11//WNT5A//WNT7B
GO:0002717	positive_regulation_of_natural_killer_cell_mediated_immunity	Biological Process	8	30	1492	18342	0.00217197	0.0262681	2.66315	3.27828	0.00536193	MICA//MICB//NECTIN2//RAET1G//RAET1L//SH2D1B//ULBP2//ULBP3
GO:0015991	ATP_hydrolysis_coupled_proton_transport	Biological Process	8	30	1492	18342	0.00217197	0.0262681	2.66315	3.27828	0.00536193	ATP1A1//ATP1A3//ATP6V0A1//ATP6V0B//ATP6V0C//ATP6V0D1//ATP6V0E1//ATP6V1A
GO:0061036	positive_regulation_of_cartilage_development	Biological Process	8	30	1492	18342	0.00217197	0.0262681	2.66315	3.27828	0.00536193	BMP4//BMP6//CYR61//FGF18//HOXA11//POR//SOX9//WNT5A
GO:0000165	MAPK_cascade	Biological Process	46	367	1492	18342	0.00220093	0.0265711	2.65739	1.54088	0.0308311	ARTN//CAMK2G//CCL2//CDC42EP5//CHUK//CRKL//CSF2//DAB2IP//DUSP6//DUSP9//EPHB3//EPHB4//EREG//FGF18//FGF19//FGFR1//FGFR4//HBEGF//IL2RG//IL31RA//ILK//IRS2//ITGAV//KBTBD7//KITLG//KLB//MAP2K3//MAP2K6//MAP3K10//MAP3K12//MAP3K8//MAPK8IP1//MAPKAPK2//NRG4//PTGER4//RASGEF1A//SHANK3//SOX9//TGFB1//TNF//TRIB1//UBB//WDR83//WNT5A//WNT7B//ZFP36L2
GO:1902679	negative_regulation_of_RNA_biosynthetic_process	Biological Process	133	1288	1492	18342	0.00221798	0.0267296	2.65404	1.26944	0.0891421	ARID5B//ARNTL//BAG3//BCL6//BHLHE41//BMP4//BMP6//BRMS1//C11orf95//CAV1//CBX6//CCND3//CDK5//CDKN1C//CEBPA//CEBPB//CIC//CREB3L1//CREM//CRY1//CSF2//DAB2IP//DEDD2//DLL4//DLX2//DLX4//DNAJB1//DNAJB4//DPF1//EDN1//EGR1//ELF3//EN1//EREG//ETV3//FGFR1//FOSB//FOXC2//FOXF1//FOXO1//FOXO6//FOXQ1//GATA2//HES2//HEXIM1//HIST1H1C//HOXB13//HOXB4//HOXC6//HOXD8//HSBP1//HSPA1A//ID2//IGF2//IRF2BP1//IRF2BPL//JUN//KDM1A//K…
GO:0007178	transmembrane_receptor_protein_serine|threonine_kinase_signaling_pathway	Biological Process	29	204	1492	18342	0.00224843	0.0269904	2.64812	1.74761	0.019437	ACVR1//ARRB2//BMP4//BMP6//CDH5//CGN//COL3A1//EGR1//FOS//FURIN//FUT8//GCNT2//GDF11//HPGD//INHBB//JUN//LRP4//LTBP1//MSX1//MSX2//NOG//RBM14//SMAD6//TGFB1//TGFB2//TGFBR3//TOB1//UBB//UBE2D1
GO:0000281	mitotic_cytokinesis	Biological Process	13	66	1492	18342	0.00225284	0.0269904	2.64727	2.42146	0.00871314	APC//CENPA//CFL1//ESPL1//INCENP//KIF20A//PLK1//RHOB//RHOC//SEPT3//SEPT5//SNX18//UNC119
GO:0009410	response_to_xenobiotic_stimulus	Biological Process	36	270	1492	18342	0.00226004	0.0269904	2.64588	1.63914	0.0241287	AADAC//ABCC2//ACSL1//AKR1C1//AOC2//AQP1//ARNT2//ASIC1//CDK5//CES1//CYP1A1//CYP26B1//CYP2S1//CYP3A5//CYP3A7//EDN1//EGR1//EPHX1//ERRFI1//FADD//FBXO32//FOSB//FOXO1//GSTM3//GSTM4//MT-ND6//POR//PPARG//PPARGC1A//PPP1R9B//PRKAR2B//PRKCG//PTGS1//SNCA//TGFB1//TIGAR
GO:0050768	negative_regulation_of_neurogenesis	Biological Process	36	270	1492	18342	0.00226004	0.0269904	2.64588	1.63914	0.0241287	ADGRG1//APP//C16orf45//CDK5//COL3A1//CRMP1//DIXDC1//DLX2//DUSP10//EFNB2//GDF11//ID2//ISL2//ITM2C//LDLR//LRP1//LRP4//MYLIP//NGFR//NOG//NOTCH3//NTN1//PLK2//PTPRS//RAB29//RTN4RL1//RTN4RL2//SEMA6B//SEMA6C//SEMA7A//SOX9//SPOCK1//SPP1//STAT3//TGFB1//WNT5A
GO:0010888	negative_regulation_of_lipid_storage	Biological Process	6	18	1492	18342	0.00226341	0.0269904	2.64524	4.09786	0.00402145	ABCG1//ITGAV//ITGB3//NFKBIA//PPARG//TNF
GO:0060575	intestinal_epithelial_cell_differentiation	Biological Process	6	18	1492	18342	0.00226341	0.0269904	2.64524	4.09786	0.00402145	GATA5//HIF1A//KLF5//NKX3-2//PRDM1//TIGAR
GO:0070542	response_to_fatty_acid	Biological Process	15	82	1492	18342	0.00232352	0.0275915	2.63385	2.24882	0.0100536	ACSL1//AKR1C2//AKR1C3//CCNB1//EDN1//LDLR//PDK3//PDK4//PID1//PPARG//PPARGC1A//PTGER2//PTGER4//PTGS2//TGFBR3
GO:0010628	positive_regulation_of_gene_expression	Biological Process	191	1937	1492	18342	0.00232892	0.0275915	2.63285	1.21222	0.128016	ACVR1//ADRB2//AFAP1L2//ALOX12B//APP//ARID3B//ARNT2//ARNTL//ARRB1//ARRB2//ATXN7L3//AXIN2//BAMBI//BCL10//BCL2L12//BMP4//BMP6//CASZ1//CAV1//CCNB1//CCPG1//CD81//CDK9//CDKN1C//CDKN2B//CDON//CEBPA//CEBPB//CGA//CHUK//CKS2//CLU//COL1A1//CREB3//CREB3L1//CREB3L3//CREM//CSF2//CSRNP1//CXXC1//CYP26B1//CYR61//DAB2IP//DDN//DDX58//DLGAP5//DLL4//DLX2//DLX3//DPF1//EDN1//EGR1//EGR3//EHF//ELF3//EN1//EN2//ETV4//F12//…
GO:0045080	positive_regulation_of_chemokine_biosynthetic_process	Biological Process	4	8	1492	18342	0.00233726	0.0275915	2.63129	6.14678	0.00268097	EGR1//HMOX1//TNF//WNT5A
GO:1905005	regulation_of_epithelial_to_mesenchymal_transition_involved_in_endocardial_cushion_formation	Biological Process	4	8	1492	18342	0.00233726	0.0275915	2.63129	6.14678	0.00268097	ACVR1//NOG//TGFB1//TGFB2
GO:0002443	leukocyte_mediated_immunity	Biological Process	83	749	1492	18342	0.00233732	0.0275915	2.63128	1.3623	0.05563	ACPP//AGPAT2//ALDOC//ATP6V0A1//ATP6V0C//ATP8A1//BCL10//BST2//C4BPA//CAP1//CD14//CD58//CD63//CEACAM1//CLU//CMTM6//CRISPLD2//CTSD//CYSTM1//DGAT1//DOK3//DYNLL1//EMP2//FABP5//GCNT3//GGH//GHDC//GLA//GLIPR1//GM2A//GMFG//GOLGA7//GSN//HSP90AA1//HSPA1A//HSPA1B//IDH1//IL13RA2//IL31RA//IQGAP2//ITGAV//LIG4//LYST//MCEMP1//METTL7A//MICA//MICB//MMP9//NEU1//NR4A3//OSTF1//PGAM1//PKM//PLA2G3//PLEKHO2//PRDX1//PRDX4…
GO:0003179	heart_valve_morphogenesis	Biological Process	9	37	1492	18342	0.00234218	0.0275915	2.63038	2.99033	0.00603217	ACVR1//BMP4//CYR61//OLFM1//SMAD6//SOX4//SOX9//TGFB1//TGFB2
GO:0031018	endocrine_pancreas_development	Biological Process	9	37	1492	18342	0.00234218	0.0275915	2.63038	2.99033	0.00603217	ANXA1//BAK1//BMP4//BMP6//FOXO1//MNX1//SOX4//SOX9//WNT5A
GO:0030199	collagen_fibril_organization	Biological Process	10	44	1492	18342	0.00235604	0.0277069	2.62782	2.79399	0.00670241	ATP7A//COL1A1//COL3A1//COL5A3//FOXC2//LOX//P4HA1//PLOD2//TGFB2//TNXB
GO:0007010	cytoskeleton_organization	Biological Process	117	1115	1492	18342	0.00236702	0.027788	2.6258	1.29	0.0784182	ADD3//ANG//ANXA1//AQP1//ARC//ARRB1//AURKA//BCAR1//BCL6//CAMSAP3//CAP1//CARMIL1//CCDC69//CCL2//CCNB1//CDC20//CDC42EP2//CDK5//CENPA//CENPW//CEP19//CFL1//CNN3//CRIPT//CRMP1//DBN1//DES//DNAAF3//DPYSL2//ELMO2//EMP2//ESPL1//FAT1//FES//FRMD3//FSCN1//FSD1//GAS2L3//GPSM2//GSN//INA//IQGAP2//KIF20A//KIF3A//KLHL41//KRT14//KRT16//KRT18//KRT19//KRT3//KRT8//LRRC61//MAD2L2//MAP1A//MAPRE2//MAPT//MAST3//MKLN1//MSN…
GO:0060135	maternal_process_involved_in_female_pregnancy	Biological Process	12	59	1492	18342	0.00247485	0.0290038	2.60645	2.50039	0.0080429	AKR1B1//APOL2//BSG//CTSV//EPOR//HAVCR2//HMX3//PRDM1//PTGS2//SPP1//STC1//VDR
GO:0048592	eye_morphogenesis	Biological Process	22	142	1492	18342	0.00250561	0.0293139	2.60109	1.90464	0.0147453	ARL6//BAK1//BCAR3//BMP4//CALB1//CDON//COL8A2//DIO3//GDF11//HIF1A//MFAP2//NECTIN1//PRDM1//RARB//ROM1//RORB//SHROOM2//SOX9//STAT3//TSPAN12//VEGFA//WNT5A
GO:2001235	positive_regulation_of_apoptotic_signaling_pathway	Biological Process	25	169	1492	18342	0.0025456	0.0297195	2.59421	1.81857	0.016756	BAK1//BCAP31//BCL10//BMF//CAV1//DAB2IP//DEDD2//FADD//GSN//HYAL2//INHBB//ITM2C//LCK//MAL//MMP9//MSX1//NKX3-1//PINK1//PLEKHF1//SLC9A3R1//SRPX//TIMP3//TPD52L1//UBB//ZNF205
GO:0009991	response_to_extracellular_stimulus	Biological Process	59	501	1492	18342	0.002549	0.0297195	2.59363	1.44775	0.0395442	ACSL1//ADIPOR2//ADRB2//AKR1C3//AQP3//ATG5//BCL10//CDKN2B//CDKN2D//CIB2//COL1A1//CPEB4//CTSV//CYP1A1//CYP24A1//CYP26B1//FKBP1B//FOS//FOXO1//G6PD//GAST//GDAP1//GLUL//GSN//HMGCR//HMOX1//INHBB//ITGA2//JUN//KAT2A//LDHA//LDLR//MAP1LC3B2//MTHFR//NOCT//OMA1//PANX1//PDK4//PKM//PLEKHF1//POR//PPARG//PPARGC1A//PPM1D//PPP1R9B//PTGS2//RRAGA//RRAGC//SESN3//SLC27A4//SLC38A2//SPARC//SPP1//STC1//TGFB1//VDR//VGF//W…
GO:0010745	negative_regulation_of_macrophage_derived_foam_cell_differentiation	Biological Process	5	13	1492	18342	0.00261368	0.0302662	2.58275	4.72829	0.00335121	ABCG1//ITGAV//ITGB3//NFKBIA//PPARG
GO:0030950	establishment_or_maintenance_of_actin_cytoskeleton_polarity	Biological Process	5	13	1492	18342	0.00261368	0.0302662	2.58275	4.72829	0.00335121	AQP1//RHOB//RHOC//RND1//RND2
GO:0042574	retinal_metabolic_process	Biological Process	5	13	1492	18342	0.00261368	0.0302662	2.58275	4.72829	0.00335121	AKR1C1//AKR1C3//RDH10//RDH11//SDR16C5
GO:0042635	positive_regulation_of_hair_cycle	Biological Process	5	13	1492	18342	0.00261368	0.0302662	2.58275	4.72829	0.00335121	GAL//MSX2//TGFB2//TNF//WNT5A
GO:0071347	cellular_response_to_interleukin-1	Biological Process	20	125	1492	18342	0.00262268	0.0302802	2.58125	1.96697	0.0134048	ABCC2//CCL2//CCL26//CEBPB//CHUK//CXCL8//DAB2IP//EDN1//EGR1//GBP2//HIF1A//HYAL2//IL1R1//IL1R2//MAP3K8//NFKBIA//NKX3-1//PELI1//SOX9//UBB
GO:0031667	response_to_nutrient_levels	Biological Process	56	471	1492	18342	0.00262378	0.0302802	2.58107	1.46166	0.0375335	ACSL1//ADIPOR2//ADRB2//AKR1C3//AQP3//ATG5//BCL10//CDKN2B//CDKN2D//CIB2//COL1A1//CPEB4//CTSV//CYP1A1//CYP24A1//CYP26B1//FKBP1B//FOXO1//G6PD//GAST//GDAP1//GLUL//GSN//HMGCR//HMOX1//INHBB//ITGA2//JUN//KAT2A//LDHA//LDLR//MAP1LC3B2//MTHFR//OMA1//PANX1//PDK4//PKM//PLEKHF1//POR//PPARG//PPARGC1A//PPM1D//PTGS2//RRAGA//RRAGC//SESN3//SLC27A4//SLC38A2//SPARC//SPP1//STC1//TGFB1//VDR//VGF//WNT11//ZNF354A
GO:0007492	endoderm_development	Biological Process	14	75	1492	18342	0.0026367	0.0303344	2.57894	2.2948	0.00938338	ARC//BMP4//HOXC11//HSBP1//ITGA5//ITGA7//ITGAV//MMP14//MMP15//MMP2//MMP9//NOG//PELO//TGFB1
GO:0002682	regulation_of_immune_system_process	Biological Process	154	1527	1492	18342	0.00263738	0.0303344	2.57883	1.23982	0.103217	ADORA1//ANXA1//APP//AQP3//ARG2//ARRB2//ATG5//ATP11C//BCAR1//BCL10//BCL6//BMP4//BST2//BTN2A1//C4BPA//CAMK1D//CAV1//CCL2//CD101//CD14//CD320//CD79B//CD81//CD83//CEACAM1//CEBPB//CHUK//CLU//COL1A1//COL3A1//CREB3//CSF2//CXCL14//CXCL8//CYP26B1//DAB2IP//DDX58//DUSP10//ECM1//EDN1//EFNB1//EGR3//ELMO2//EREG//F2RL1//FADD//FAM19A3//FES//FOS//FOXF1//FYB1//GAL//GATA2//GPR17//GPRC5B//GPSM3//GSN//HAVCR2//HCST//H…
GO:0031398	positive_regulation_of_protein_ubiquitination	Biological Process	18	108	1492	18342	0.00266125	0.0304545	2.57491	2.04893	0.0120643	ADRB2//ARRB1//ARRB2//BCL10//CAV1//CDC20//CDK9//KDM1A//MALT1//NDFIP2//PELI1//PINK1//PLK1//RASSF5//UBB//UBE2C//UBE2D1//UBE2S
GO:0048593	camera-type_eye_morphogenesis	Biological Process	18	108	1492	18342	0.00266125	0.0304545	2.57491	2.04893	0.0120643	ARL6//BAK1//BCAR3//BMP4//CALB1//CDON//COL8A2//DIO3//GDF11//HIF1A//NECTIN1//ROM1//RORB//SHROOM2//SOX9//TSPAN12//VEGFA//WNT5A
GO:1901800	positive_regulation_of_proteasomal_protein_catabolic_process	Biological Process	18	108	1492	18342	0.00266125	0.0304545	2.57491	2.04893	0.0120643	AURKA//BCAP31//CAV1//CEBPA//CLU//DAB2IP//HSPA1A//HSPA1B//NKD2//PLK1//PLK2//PSMC4//RNF14//RNF144B//SOCS5//TRIB1//TRIB2//VCP
GO:0001893	maternal_placenta_development	Biological Process	8	31	1492	18342	0.00272172	0.0310421	2.56516	3.17253	0.00536193	BSG//CTSV//EPOR//PRDM1//PTGS2//SPP1//STC1//VDR
GO:0060325	face_morphogenesis	Biological Process	8	31	1492	18342	0.00272172	0.0310421	2.56516	3.17253	0.00536193	ARID5B//COL1A1//CRISPLD2//CSRNP1//MMP2//MSX1//NOG//TGFB1
GO:0050792	regulation_of_viral_process	Biological Process	26	179	1492	18342	0.00273612	0.0311542	2.56286	1.78566	0.0174263	APOBEC3C//BST2//CDK9//CFL1//CXCL8//GSN//GTF2B//IFIT1//JUN//LAMP3//MID2//MVB12A//MX1//NECTIN2//OAS1//OAS3//OASL//PC//POU2F3//PTX3//SLPI//TNF//TRIM15//TRIM31//TRIM5//TRIM62
GO:0006812	cation_transport	Biological Process	97	903	1492	18342	0.00274135	0.0311617	2.56204	1.32057	0.0650134	ABCC2//ANO10//ANXA6//AQP1//ASIC1//ATP1A1//ATP1A3//ATP1B1//ATP1B2//ATP1B3//ATP2A3//ATP6V0A1//ATP6V0B//ATP6V0C//ATP6V0D1//ATP6V0E1//ATP6V1A//ATP7A//ATP8A1//AZIN2//CACNA1G//CACNA1H//CALHM2//CALHM3//CAMK2G//CAV1//CDK5//CNNM4//COX6A1//CSF2//CYB5A//EDN1//FKBP1B//FXYD1//FXYD2//HCN2//ITGAV//JPH3//KCND1//KCNH2//KCNH3//KCNH4//KCNJ4//KCNK3//KCNK5//KCNMB4//LCK//MAGED2//MCOLN1//MICU1//NDFIP2//NECTIN1//NSF//PA…
GO:0071466	cellular_response_to_xenobiotic_stimulus	Biological Process	25	170	1492	18342	0.00275976	0.0313186	2.55913	1.80788	0.016756	AADAC//ABCC2//ACSL1//AKR1C1//AOC2//AQP1//ARNT2//CES1//CYP1A1//CYP26B1//CYP2S1//CYP3A5//CYP3A7//EGR1//EPHX1//ERRFI1//FBXO32//FOXO1//GSTM3//GSTM4//POR//PPARGC1A//PPP1R9B//PTGS1//TGFB1
GO:0071559	response_to_transforming_growth_factor_beta	Biological Process	24	161	1492	18342	0.0027698	0.0313803	2.55755	1.83258	0.0160858	ACVR1//ARRB2//CAV1//CDH5//CGN//COL1A1//COL3A1//EDN1//FOS//FURIN//FUT8//GCNT2//HPGD//HYAL2//JUN//PPARGC1A//SMAD6//SOX9//TGFB1//TGFB2//TGFBR3//UBB//WNT5A//ZFP36L2
GO:0002573	myeloid_leukocyte_differentiation	Biological Process	17	100	1492	18342	0.0027853	0.0314814	2.55513	2.08991	0.0113941	APP//BMP4//CEBPA//CSF2//EFNA2//EFNA4//F2RL1//GATA2//IL31RA//JUN//L3MBTL3//MMP9//PPARG//PRTN3//TGFB1//TNF//VEGFA
GO:0051186	cofactor_metabolic_process	Biological Process	59	503	1492	18342	0.00278797	0.0314814	2.55471	1.44199	0.0395442	ACOT7//ACSL1//ACSS2//AHCYL2//AKR1B1//AKR1B10//AKR1C1//AKR1C2//AKR1C3//ALAS1//ALDOC//AMD1//BTD//CD320//COASY//CYB5A//CYP1A1//DBI//DCXR//DGAT1//ELOVL3//ENO3//FASN//G6PD//GCHFR//GDAP1//GGH//GSTM3//GSTM4//HBA1//HK1//HMGCR//HMOX1//HSP90AA1//IDH1//LDHA//ME1//MPC1//MTHFR//MVK//NUDT17//PC//PGAM1//PGM2L1//PKM//PPT2//PRDX1//PRDX4//PTGS2//PTS//SCD//SCD5//SLC2A3//SPR//ST20-MTHFS//SUCLA2//TCN1//VCP//VNN2
GO:0001909	leukocyte_mediated_cytotoxicity	Biological Process	9	38	1492	18342	0.00285117	0.0320425	2.54498	2.91163	0.00603217	EMP2//LYST//MICA//MICB//PRDX1//RAET1G//RAET1L//ULBP2//ULBP3
GO:0003197	endocardial_cushion_development	Biological Process	9	38	1492	18342	0.00285117	0.0320425	2.54498	2.91163	0.00603217	ACVR1//BMP4//FOXF1//MSX1//MSX2//NOG//SNAI1//SOX9//TGFB2
GO:0006650	glycerophospholipid_metabolic_process	Biological Process	44	352	1492	18342	0.00285178	0.0320425	2.54488	1.5367	0.0294906	ABHD4//AGPAT2//BPNT1//DBI//EREG//ETNK2//ETNPPL//FABP5//FGF18//FGF19//FGFR1//FGFR4//GDE1//GDPD3//HBEGF//IP6K2//IRS2//KITLG//KLB//LCK//LIPH//LPCAT2//LPCAT3//LPCAT4//LPIN1//MFSD2A//MTMR2//NRG4//PGP//PHOSPHO1//PIGH//PIK3R3//PIP4K2A//PLA2G15//PLA2G3//PLA2G4A//PNPLA6//PTPN13//SERINC2//SERINC5//SLC44A3//SOCS1//SOCS5//STARD10
GO:0010720	positive_regulation_of_cell_development	Biological Process	59	504	1492	18342	0.0029146	0.0326945	2.53542	1.43913	0.0395442	ADRA2B//APP//AURKA//BCL6//BDNF//BMP4//BMP6//CAMK1D//CARMIL1//CDH5//CDKL5//CDON//CRABP2//CRKL//CXCR4//DAB2IP//DLX2//EDN1//EFNA5//FES//FGFR1//FKBP1B//FOXO6//FZD4//GATA2//GPRC5B//HAP1//HIF1A//HOXA11//ID2//ILK//KDM1A//LIG4//MAPT//NEURL1//NGFR//NPTN//NTN1//P3H1//PPARG//PPP2R5B//RARB//RGS14//RND2//S1PR2//SCN1B//SEMA7A//SERPINE2//SH3GL3//SHANK3//SLC9B2//SPEN//SRRT//TRIB1//UNC13A//VEGFA//VEGFC//WNT5A//ZM…
GO:0031098	stress-activated_protein_kinase_signaling_cascade	Biological Process	21	135	1492	18342	0.0029509	0.0330472	2.53005	1.91233	0.0140751	AKR1B1//CDC42EP5//CHUK//CRKL//DAB2IP//DUSP9//MAP2K3//MAP2K6//MAP3K10//MAP3K12//MAP3K8//MAPK8IP1//MAPKAPK2//PAK4//PAK6//PTGER4//TNF//TRIB1//UBB//WNT5A//WNT7B
GO:0008585	female_gonad_development	Biological Process	15	84	1492	18342	0.00296329	0.0330771	2.52823	2.19528	0.0100536	ADAMTS1//ANG//ARID5B//ARRB1//ARRB2//CEBPB//COL9A3//EREG//FZD4//IDH1//INHBB//LFNG//MMP14//VEGFA//VGF
GO:0017156	calcium_ion_regulated_exocytosis	Biological Process	15	84	1492	18342	0.00296329	0.0330771	2.52823	2.19528	0.0100536	C2CD4C//CDK5//RAB3A//RIMS3//RIMS4//SEPT5//SNPH//STX1A//STXBP1//SYT12//SYT7//SYTL2//SYTL4//TC2N//UNC13A
GO:0031397	negative_regulation_of_protein_ubiquitination	Biological Process	13	68	1492	18342	0.00297007	0.0330986	2.52723	2.35024	0.00871314	ARRB1//ARRB2//ATG5//CAV1//CDK5//CRY1//DNAJA1//HSPA1A//HSPA1B//MAD2L2//PRKCG//RASD2//SOX4
GO:0050821	protein_stabilization	Biological Process	24	162	1492	18342	0.00300711	0.0334565	2.52185	1.82127	0.0160858	ATP1B1//ATP1B2//ATP1B3//BAG3//CLU//FKBPL//GOLGA7//HSP90AA1//HSPA1A//HSPA1B//IFT46//MORC3//MSX1//NAPG//P3H1//PIM2//PINK1//PLPP3//PPARGC1A//SOX4//STXBP1//TESC//TSPAN1//USP2
GO:2000482	regulation_of_interleukin-8_secretion	Biological Process	7	25	1492	18342	0.00302159	0.0335628	2.51976	3.4422	0.00469169	ANXA1//CD14//CD58//F2RL1//HYAL2//TMSB4X//WNT5A
GO:0010644	cell_communication_by_electrical_coupling	Biological Process	6	19	1492	18342	0.00308276	0.0340203	2.51106	3.88218	0.00402145	ATP1A1//ATP1A3//ATP1B1//ATP1B2//DBN1//FKBP1B
GO:0031065	positive_regulation_of_histone_deacetylation	Biological Process	6	19	1492	18342	0.00308276	0.0340203	2.51106	3.88218	0.00402145	BCL6//PINK1//SDR16C5//TGFB1//VEGFA//ZBTB7B
GO:0035089	establishment_of_apical|basal_cell_polarity	Biological Process	6	19	1492	18342	0.00308276	0.0340203	2.51106	3.88218	0.00402145	CAMSAP3//FOXF1//FSCN1//MSN//SLC9A3R1//WNT5A
[truncated: 1,563 more rows]

## Sheet: CC-down
Column "ID" stands for the ID of gene ontology term
Column "Term" stands for the name of gene ontology term
Column "Ontology" stands for the class of ontology
[truncated: 159 more rows]

## Sheet: CC-up
Column "ID" stands for the ID of gene ontology term
[truncated: 229 more rows]

[truncated: 2 more sheets: MF-down, MF-up]
