# Supplementary material for: Transcriptome profiling of A549 non-small cell lung cancer cells in response to Trichinella spiralis muscle larvae excretory/secretory products
Source: Front Vet Sci. 2023 Jul 31;10:1208538. doi: 10.3389/fvets.2023.1208538 (PMC10433203; doi:10.3389/fvets.2023.1208538)
Supplement: Supplementary file 4 [file Table_4.XLS]

## Sheet: KEGG-UP
Column "ID" stands for pathway identifier used in KEGG
Column "Term" stands for the name of the pathway
Column "WebSite"stands for The map's website,the nodes with red frame and red symbol are associated with the DE genes, green nodes have no significance
Column "Count" stands for the count of the DE genes directly associated with the listed pathway
Column "Size" stands for the count of the chosen background population genes associated with the listed pathway
Column "numInt" stands for the total number of the DE genes
Column "numTotal" stands for the total number of background population genes
Column "p_value" stands for the enrichment p-value of the pathway used Fisher exact test
Column "fdr" stands for the false discovery rate of the pathway
Column "Enrichment_Score" stands for the Enrichment Score value of the pathway, it equals "-log10(p_value)"
Column "GeneRatio" stands for the Gene Ratio value of the pathway, it equals "Count/numInt"
Column "Genes" stands for the DE genes associated with the pathway
ID	Term	WebSite	Count	Size	numInt	numTotal	p_value	fdr	Enrichment_Score	GeneRatio	Genes
hsa00100	Steroid_biosynthesis	http://www.genome.jp/kegg-bin/show_pathway?hsa00100+1591+1595+1718+1717+10682+2222+3988+6307+50814+6309+6646+6713	12	20	701	7257	3.66397e-08	1.09186e-05	7.43605	0.0171184	CYP24A1//CYP51A1//DHCR24//DHCR7//EBP//FDFT1//LIPA//MSMO1//NSDHL//SC5D//SOAT1//SQLE
hsa05205	Proteoglycans_in_cancer	http://www.genome.jp/kegg-bin/show_pathway?hsa05205+23365+818+857+868+967+81578+1514+2260+11211+8322+8324+1839+3091+3481+3673+3678+3685+3690+4313+4318+4478+8503+5582+22800+6383+6548+6774+7040+7042+7078+7099+7124+117581+7422+7481+7474+7475+7477	38	203	701	7257	4.40086e-05	0.00655729	4.35646	0.0542083	ARHGEF12//CAMK2G//CAV1//CBLB//CD63//COL21A1//CTSL//FGFR1//FZD10//FZD4//FZD7//HBEGF//HIF1A//IGF2//ITGA2//ITGA5//ITGAV//ITGB3//MMP2//MMP9//MSN//PIK3R3//PRKCG//RRAS2//SDC2//SLC9A1//STAT3//TGFB1//TGFB2//TIMP3//TLR4//TNF//TWIST2//VEGFA//WNT11//WNT5A//WNT6//WNT7B
hsa04668	TNF_signaling_pathway	http://www.genome.jp/kegg-bin/show_pathway?hsa04668+6347+1051+1147+10488+90993+84699+1437+153090+1906+8772+2353+8809+3725+5606+5608+1326+4323+4318+4792+8503+5743+7124+7133+7424	24	108	701	7257	7.36176e-05	0.00731268	4.13302	0.0342368	CCL2//CEBPB//CHUK//CREB3//CREB3L1//CREB3L3//CSF2//DAB2IP//EDN1//FADD//FOS//IL18R1//JUN//MAP2K3//MAP2K6//MAP3K8//MMP14//MMP9//NFKBIA//PIK3R3//PTGS2//TNF//TNFRSF1B//VEGFC
hsa05418	Fluid_shear_stress_and_atherosclerosis	http://www.genome.jp/kegg-bin/show_pathway?hsa05418+90+652+857+6347+1003+1147+1514+1906+2353+2947+2948+3162+3320+3554+7850+3685+3690+3725+5608+4313+4318+4688+8503+5880+6383+387082+7124+7422	28	139	701	7257	0.000120839	0.00900249	3.91779	0.0399429	ACVR1//BMP4//CAV1//CCL2//CDH5//CHUK//CTSL//EDN1//FOS//GSTM3//GSTM4//HMOX1//HSP90AA1//IL1R1//IL1R2//ITGAV//ITGB3//JUN//MAP2K6//MMP2//MMP9//NCF2//PIK3R3//RAC2//SDC2//SUMO4//TNF//VEGFA
hsa04978	Mineral_absorption	http://www.genome.jp/kegg-bin/show_pathway?hsa04978+476+478+481+482+483+538+486+3162+4490+4494+4501+7779+140803+7421	14	51	701	7257	0.000234721	0.0139894	3.62945	0.0199715	ATP1A1//ATP1A3//ATP1B1//ATP1B2//ATP1B3//ATP7A//FXYD2//HMOX1//MT1B//MT1F//MT1X//SLC30A1//TRPM6//VDR
hsa05200	Pathways_in_cancer	http://www.genome.jp/kegg-bin/show_pathway?hsa05200+324+23365+9915+8313+624+652+868+1030+1050+1147+1164+1282+1399+3576+7852+112399+8772+8817+9965+2260+2353+2308+11211+8322+8324+2786+2793+3091+3320+3673+3685+3725+4254+4313+4318+4792+4824+5228+8503+5468+5582+5732+5734+5743+5880+5898+5915+10235+83593+6774+7040+7042+7170+7422+7424+7481+7474+7475+7477	59	395	701	7257	0.000383635	0.0190539	3.41608	0.0841655	APC//ARHGEF12//ARNT2//AXIN2//BDKRB2//BMP4//CBLB//CDKN2B//CEBPA//CHUK//CKS2//COL4A1//CRKL//CXCL8//CXCR4//EGLN3//FADD//FGF18//FGF19//FGFR1//FOS//FOXO1//FZD10//FZD4//FZD7//GNG4//GNGT2//HIF1A//HSP90AA1//ITGA2//ITGAV//JUN//KITLG//MMP2//MMP9//NFKBIA//NKX3-1//PGF//PIK3R3//PPARG//PRKCG//PTGER2//PTGER4//PTGS2//RAC2//RALA//RARB//RASGRP2//RASSF5//STAT3//TGFB1//TGFB2//TPM3//VEGFA//VEGFC//WNT11//WNT5A//WNT6//…
hsa04974	Protein_digestion_and_absorption	http://www.genome.jp/kegg-bin/show_pathway?hsa04974+476+478+481+482+483+1306+1277+81578+1281+1282+50509+1292+1299+486+8645+6505+206358+54407+23428	19	90	701	7257	0.000798462	0.0339917	3.09775	0.0271041	ATP1A1//ATP1A3//ATP1B1//ATP1B2//ATP1B3//COL15A1//COL1A1//COL21A1//COL3A1//COL4A1//COL5A3//COL6A2//COL9A3//FXYD2//KCNK5//SLC1A1//SLC36A1//SLC38A2//SLC7A8
hsa04964	Proximal_tubule_bicarbonate_reclamation	http://www.genome.jp/kegg-bin/show_pathway?hsa04964+358+476+478+481+482+483+486+2744	8	23	701	7257	0.000956406	0.0356261	3.01936	0.0114123	AQP1//ATP1A1//ATP1A3//ATP1B1//ATP1B2//ATP1B3//FXYD2//GLS
hsa00533	Glycosaminoglycan_biosynthesis-keratan_sulfate	http://www.genome.jp/kegg-bin/show_pathway?hsa00533+10678+93010+9435+4166+2530+6483	6	14	701	7257	0.00121066	0.0379463	2.91698	0.0085592	B3GNT2//B3GNT7//CHST2//CHST6//FUT8//ST3GAL2
hsa04961	Endocrine_and_other_factor-regulated_calcium_reabsorption	http://www.genome.jp/kegg-bin/show_pathway?hsa04961+1175+476+478+481+482+483+624+793+1759+486+5582+7421	12	47	701	7257	0.0013096	0.0379463	2.88286	0.0171184	AP2S1//ATP1A1//ATP1A3//ATP1B1//ATP1B2//ATP1B3//BDKRB2//CALB1//DNM1//FXYD2//PRKCG//VDR
hsa04142	Lysosome	http://www.genome.jp/kegg-bin/show_pathway?hsa04142+1174+535+533+527+9114+967+1509+1514+1515+2717+2760+79158+27074+9741+55353+7805+3988+57192+4758+23659+9374+26503+6272	23	123	701	7257	0.0014007	0.0379463	2.85365	0.0328103	AP1S1//ATP6V0A1//ATP6V0B//ATP6V0C//ATP6V0D1//CD63//CTSD//CTSL//CTSV//GLA//GM2A//GNPTAB//LAMP3//LAPTM4A//LAPTM4B//LAPTM5//LIPA//MCOLN1//NEU1//PLA2G15//PPT2//SLC17A5//SORT1
hsa05323	Rheumatoid_arthritis	http://www.genome.jp/kegg-bin/show_pathway?hsa05323+535+533+527+9114+8992+523+6347+1437+1514+3576+2353+3108+3725+7040+7042+7099+7124+7422	18	90	701	7257	0.00207646	0.0515655	2.68268	0.0256776	ATP6V0A1//ATP6V0B//ATP6V0C//ATP6V0D1//ATP6V0E1//ATP6V1A//CCL2//CSF2//CTSL//CXCL8//FOS//HLA-DMA//JUN//TGFB1//TGFB2//TLR4//TNF//VEGFA
hsa04010	MAPK_signaling_pathway	http://www.genome.jp/kegg-bin/show_pathway?hsa04010+408+409+627+8913+8912+929+1147+1399+11221+1848+1852+8817+9965+2260+2264+2353+3303+3304+3305+3315+3554+7850+3725+5606+5608+7786+1326+9479+9261+4137+3164+5321+5582+5880+10235+22800+7040+7042+7124	39	255	701	7257	0.00239326	0.0545083	2.62101	0.0556348	ARRB1//ARRB2//BDNF//CACNA1G//CACNA1H//CD14//CHUK//CRKL//DUSP10//DUSP6//DUSP9//FGF18//FGF19//FGFR1//FGFR4//FOS//HSPA1A//HSPA1B//HSPA1L//HSPB1//IL1R1//IL1R2//JUN//MAP2K3//MAP2K6//MAP3K12//MAP3K8//MAPK8IP1//MAPKAPK2//MAPT//NR4A1//PLA2G4A//PRKCG//RAC2//RASGRP2//RRAS2//TGFB1//TGFB2//TNF
hsa04360	Axon_guidance	http://www.genome.jp/kegg-bin/show_pathway?hsa04360+23365+818+1020+1072+7852+1808+1943+1944+1945+1946+1947+1948+55740+2049+2050+2242+3611+9423+10298+56924+8503+5880+5998+27289+10501+10500+8482+219699+7474	29	175	701	7257	0.00256079	0.0545083	2.59163	0.0413695	ARHGEF12//CAMK2G//CDK5//CFL1//CXCR4//DPYSL2//EFNA2//EFNA3//EFNA4//EFNA5//EFNB1//EFNB2//ENAH//EPHB3//EPHB4//FES//ILK//NTN1//PAK4//PAK6//PIK3R3//RAC2//RGS3//RND1//SEMA6B//SEMA6C//SEMA7A//UNC5B//WNT5A
hsa03050	Proteasome	http://www.genome.jp/kegg-bin/show_pathway?hsa03050+11047+51371+5683+5685+5691+5694+5704+5707+5717+10213+5709	11	45	701	7257	0.00299574	0.0595154	2.5235	0.0156919	ADRM1//POMP//PSMA2//PSMA4//PSMB3//PSMB6//PSMC4//PSMD1//PSMD11//PSMD14//PSMD3
hsa04919	Thyroid_hormone_signaling_pathway	http://www.genome.jp/kegg-bin/show_pathway?hsa04919+476+478+481+482+483+652+1735+2308+486+3091+3685+3690+2648+8202+4854+8503+5582+1827+6548+9882+7067	21	116	701	7257	0.00333677	0.0621474	2.47667	0.0299572	ATP1A1//ATP1A3//ATP1B1//ATP1B2//ATP1B3//BMP4//DIO3//FOXO1//FXYD2//HIF1A//ITGAV//ITGB3//KAT2A//NCOA3//NOTCH3//PIK3R3//PRKCG//RCAN1//SLC9A1//TBC1D4//THRA
hsa05166	HTLV-I_infection	http://www.genome.jp/kegg-bin/show_pathway?hsa05166+51529+324+894+896+991+1030+1147+1390+1437+1958+2353+11211+8322+8324+3105+3106+3108+3554+7850+3561+3725+2648+3932+4487+4488+4792+8503+56655+9232+22800+7040+7042+7124+7481+7474+7475+7477+7514	38	255	701	7257	0.00426357	0.0747379	2.37023	0.0542083	ANAPC11//APC//CCND2//CCND3//CDC20//CDKN2B//CHUK//CREM//CSF2//EGR1//FOS//FZD10//FZD4//FZD7//HLA-A//HLA-B//HLA-DMA//IL1R1//IL1R2//IL2RG//JUN//KAT2A//LCK//MSX1//MSX2//NFKBIA//PIK3R3//POLE4//PTTG1//RRAS2//TGFB1//TGFB2//TNF//WNT11//WNT5A//WNT6//WNT7B//XPO1
hsa04510	Focal_adhesion	http://www.genome.jp/kegg-bin/show_pathway?hsa04510+394+9564+857+894+896+1277+1282+1292+1299+1399+3611+3672+3673+3678+3679+3685+3690+3725+10298+56924+5228+8503+5582+5880+399694+6696+7148+7408+10451+7422+7424	31	199	701	7257	0.00487957	0.080784	2.31162	0.0442225	ARHGAP5//BCAR1//CAV1//CCND2//CCND3//COL1A1//COL4A1//COL6A2//COL9A3//CRKL//ILK//ITGA1//ITGA2//ITGA5//ITGA7//ITGAV//ITGB3//JUN//PAK4//PAK6//PGF//PIK3R3//PRKCG//RAC2//SHC4//SPP1//TNXB//VASP//VAV3//VEGFA//VEGFC
hsa05144	Malaria	http://www.genome.jp/kegg-bin/show_pathway?hsa05144+6347+975+3576+3039+3040+4035+6383+7040+7042+7099+7124	11	49	701	7257	0.00602596	0.0940751	2.21997	0.0156919	CCL2//CD81//CXCL8//HBA1//HBA2//LRP1//SDC2//TGFB1//TGFB2//TLR4//TNF
hsa04721	Synaptic_vesicle_cycle	http://www.genome.jp/kegg-bin/show_pathway?hsa04721+1175+535+533+527+9114+8992+523+1759+4905+5864+6804+6812+23025	13	63	701	7257	0.00631377	0.0940751	2.19971	0.0185449	AP2S1//ATP6V0A1//ATP6V0B//ATP6V0C//ATP6V0D1//ATP6V0E1//ATP6V1A//DNM1//NSF//RAB3A//STX1A//STXBP1//UNC13A
hsa04810	Regulation_of_actin_cytoskeleton	http://www.genome.jp/kegg-bin/show_pathway?hsa04810+324+23365+9564+624+929+1072+1132+1399+55740+8817+9965+2260+2264+2934+10788+3672+3673+3678+3679+3685+3690+4478+10298+56924+8503+5305+5880+22800+6548+7114+10451+8936	32	212	701	7257	0.00689985	0.0941784	2.16116	0.0456491	APC//ARHGEF12//BCAR1//BDKRB2//CD14//CFL1//CHRM4//CRKL//ENAH//FGF18//FGF19//FGFR1//FGFR4//GSN//IQGAP2//ITGA1//ITGA2//ITGA5//ITGA7//ITGAV//ITGB3//MSN//PAK4//PAK6//PIK3R3//PIP4K2A//RAC2//RRAS2//SLC9A1//TMSB4X//VAV3//WASF1
hsa04976	Bile_secretion	http://www.genome.jp/kegg-bin/show_pathway?hsa04976+1244+358+476+478+481+482+483+2052+486+3156+3949+6522+6548+28234	14	71	701	7257	0.00712739	0.0941784	2.14707	0.0199715	ABCC2//AQP1//ATP1A1//ATP1A3//ATP1B1//ATP1B2//ATP1B3//EPHX1//FXYD2//HMGCR//LDLR//SLC4A2//SLC9A1//SLCO1B3
hsa04960	Aldosterone-regulated_sodium_reabsorption	http://www.genome.jp/kegg-bin/show_pathway?hsa04960+476+478+481+482+483+486+8503+5582+6446	9	37	701	7257	0.0072688	0.0941784	2.13854	0.0128388	ATP1A1//ATP1A3//ATP1B1//ATP1B2//ATP1B3//FXYD2//PIK3R3//PRKCG//SGK1
hsa05146	Amoebiasis	http://www.genome.jp/kegg-bin/show_pathway?hsa05146+384+929+1277+1281+1282+1437+3576+3315+3554+7850+8503+5582+5878+7040+7042+7099+7124	17	96	701	7257	0.00978134	0.121452	2.0096	0.0242511	ARG2//CD14//COL1A1//COL3A1//COL4A1//CSF2//CXCL8//HSPB1//IL1R1//IL1R2//PIK3R3//PRKCG//RAB5C//TGFB1//TGFB2//TLR4//TNF
hsa04933	AGE-RAGE_signaling_pathway_in_diabetic_complications	http://www.genome.jp/kegg-bin/show_pathway?hsa04933+6347+1277+1281+1282+3576+1906+1958+2308+3725+4313+8503+6774+7040+7042+7124+7422+7424	17	99	701	7257	0.0131939	0.150646	1.87963	0.0242511	CCL2//COL1A1//COL3A1//COL4A1//CXCL8//EDN1//EGR1//FOXO1//JUN//MMP2//PIK3R3//STAT3//TGFB1//TGFB2//TNF//VEGFA//VEGFC
hsa05202	Transcriptional_misregulation_in_cancer	http://www.genome.jp/kegg-bin/show_pathway?hsa05202+9915+604+894+929+1025+1050+1051+1437+3576+1848+2118+2308+2530+8351+8355+3207+3248+3398+7850+4005+4318+4804+8013+5468+5546+85414+7709	27	180	701	7257	0.0134669	0.150646	1.87073	0.0385164	ARNT2//BCL6//CCND2//CD14//CDK9//CEBPA//CEBPB//CSF2//CXCL8//DUSP6//ETV4//FOXO1//FUT8//HIST1H3D//HIST1H3G//HOXA11//HPGD//ID2//IL1R2//LMO2//MMP9//NGFR//NR4A3//PPARG//PRCC//SLC45A3//ZBTB17
hsa04068	FoxO_signaling_pathway	http://www.genome.jp/kegg-bin/show_pathway?hsa04068+604+891+85417+894+901+1030+1032+1147+114907+2308+100132074+3575+8660+8503+5347+10769+1901+6446+6774+7040+7042	21	131	701	7257	0.0136492	0.150646	1.86489	0.0299572	BCL6//CCNB1//CCNB3//CCND2//CCNG2//CDKN2B//CDKN2D//CHUK//FBXO32//FOXO1//FOXO6//IL7R//IRS2//PIK3R3//PLK1//PLK2//S1PR1//SGK1//STAT3//TGFB1//TGFB2
hsa05134	Legionellosis	http://www.genome.jp/kegg-bin/show_pathway?hsa05134+929+3576+1917+3303+3304+3305+4792+56681+7099+7124+7415	11	55	701	7257	0.0145585	0.150754	1.83688	0.0156919	CD14//CXCL8//EEF1A2//HSPA1A//HSPA1B//HSPA1L//NFKBIA//SAR1A//TLR4//TNF//VCP
hsa00790	Folate_biosynthesis	http://www.genome.jp/kegg-bin/show_pathway?hsa00790+250+251+8836+5805+6697	5	16	701	7257	0.0146706	0.150754	1.83355	0.00713267	ALPP//ALPPL2//GGH//PTS//SPR
hsa04015	Rap1_signaling_pathway	http://www.genome.jp/kegg-bin/show_pathway?hsa04015+9564+1399+9732+1943+1944+1945+1946+8817+9965+2260+2264+3690+4254+9223+5606+5608+4804+5228+8503+5582+5880+5898+10411+10235+83593+10636+57568+7408+7422+7424	30	210	701	7257	0.0182435	0.181219	1.73889	0.042796	BCAR1//CRKL//DOCK4//EFNA2//EFNA3//EFNA4//EFNA5//FGF18//FGF19//FGFR1//FGFR4//ITGB3//KITLG//MAGI1//MAP2K3//MAP2K6//NGFR//PGF//PIK3R3//PRKCG//RAC2//RALA//RAPGEF3//RASGRP2//RASSF5//RGS14//SIPA1L2//VASP//VEGFA//VEGFC
hsa03320	PPAR_signaling_pathway	http://www.genome.jp/kegg-bin/show_pathway?hsa03320+2180+51129+1622+2171+3611+4023+4199+5360+5468+6319+79966+10999+10580	13	72	701	7257	0.0191367	0.183959	1.71813	0.0185449	ACSL1//ANGPTL4//DBI//FABP5//ILK//LPL//ME1//PLTP//PPARG//SCD//SCD5//SLC27A4//SORBS1
hsa04670	Leukocyte_transendothelial_migration	http://www.genome.jp/kegg-bin/show_pathway?hsa04670+394+9564+1003+137075+7852+90952+4313+4318+4478+4688+100506658+8503+5582+5880+10411+83593+7408+10451	18	112	701	7257	0.0208776	0.194423	1.68032	0.0256776	ARHGAP5//BCAR1//CDH5//CLDN23//CXCR4//ESAM//MMP2//MMP9//MSN//NCF2//OCLN//PIK3R3//PRKCG//RAC2//RAPGEF3//RASSF5//VASP//VAV3
hsa04640	Hematopoietic_cell_lineage	http://www.genome.jp/kegg-bin/show_pathway?hsa04640+929+924+928+1437+2057+2812+3108+3554+7850+3575+3672+3673+3678+3690+4254+7124	16	97	701	7257	0.0227037	0.205021	1.6439	0.0228245	CD14//CD7//CD9//CSF2//EPOR//GP1BB//HLA-DMA//IL1R1//IL1R2//IL7R//ITGA1//ITGA2//ITGA5//ITGB3//KITLG//TNF
hsa04024	cAMP_signaling_pathway	http://www.genome.jp/kegg-bin/show_pathway?hsa04024+134+154+476+478+481+482+483+627+818+10488+90993+84699+2353+5348+486+610+3725+3991+4792+5141+8503+5732+5880+10411+22800+6548+6662+10451	28	198	701	7257	0.0248955	0.218202	1.60388	0.0399429	ADORA1//ADRB2//ATP1A1//ATP1A3//ATP1B1//ATP1B2//ATP1B3//BDNF//CAMK2G//CREB3//CREB3L1//CREB3L3//FOS//FXYD1//FXYD2//HCN2//JUN//LIPE//NFKBIA//PDE4A//PIK3R3//PTGER2//RAC2//RAPGEF3//RRAS2//SLC9A1//SOX9//VAV3
hsa05100	Bacterial_invasion_of_epithelial_cells	http://www.genome.jp/kegg-bin/show_pathway?hsa05100+9564+857+868+1399+1759+63916+3611+3678+10459+8503+55964+399694+8936	13	76	701	7257	0.0288946	0.243758	1.53918	0.0185449	BCAR1//CAV1//CBLB//CRKL//DNM1//ELMO2//ILK//ITGA5//MAD2L2//PIK3R3//SEPT3//SHC4//WASF1
hsa04014	Ras_signaling_pathway	http://www.genome.jp/kegg-bin/show_pathway?hsa04014+1147+1943+1944+1945+1946+8817+9965+2260+2264+2786+2793+3363+4254+4804+10298+56924+5228+8503+50487+5321+5582+5878+5880+5898+10235+83593+23179+22800+399694+7422+7424	31	227	701	7257	0.0294473	0.243758	1.53095	0.0442225	CHUK//EFNA2//EFNA3//EFNA4//EFNA5//FGF18//FGF19//FGFR1//FGFR4//GNG4//GNGT2//HTR7//KITLG//NGFR//PAK4//PAK6//PGF//PIK3R3//PLA2G3//PLA2G4A//PRKCG//RAB5C//RAC2//RALA//RASGRP2//RASSF5//RGL1//RRAS2//SHC4//VEGFA//VEGFC
hsa04911	Insulin_secretion	http://www.genome.jp/kegg-bin/show_pathway?hsa04911+476+478+481+482+483+818+10488+90993+84699+486+27345+5582+5864+6804	14	85	701	7257	0.0321218	0.252107	1.4932	0.0199715	ATP1A1//ATP1A3//ATP1B1//ATP1B2//ATP1B3//CAMK2G//CREB3//CREB3L1//CREB3L3//FXYD2//KCNMB4//PRKCG//RAB3A//STX1A
hsa04657	IL-17_signaling_pathway	http://www.genome.jp/kegg-bin/show_pathway?hsa04657+6347+1051+1147+1437+3576+8772+2353+2354+3320+3725+4322+4318+4792+5743+7124	15	93	701	7257	0.0321479	0.252107	1.49285	0.021398	CCL2//CEBPB//CHUK//CSF2//CXCL8//FADD//FOS//FOSB//HSP90AA1//JUN//MMP13//MMP9//NFKBIA//PTGS2//TNF
hsa05217	Basal_cell_carcinoma	http://www.genome.jp/kegg-bin/show_pathway?hsa05217+324+8313+652+11211+8322+8324+7481+7474+7475+7477	10	55	701	7257	0.0357301	0.273015	1.44697	0.0142653	APC//AXIN2//BMP4//FZD10//FZD4//FZD7//WNT11//WNT5A//WNT6//WNT7B
hsa04660	T_cell_receptor_signaling_pathway	http://www.genome.jp/kegg-bin/show_pathway?hsa04660+8915+868+1147+1437+2353+3725+3932+10892+1326+4792+4793+10298+56924+8503+7124+10451	16	103	701	7257	0.0375064	0.275839	1.4259	0.0228245	BCL10//CBLB//CHUK//CSF2//FOS//JUN//LCK//MALT1//MAP3K8//NFKBIA//NFKBIB//PAK4//PAK6//PIK3R3//TNF//VAV3
hsa04662	B_cell_receptor_signaling_pathway	http://www.genome.jp/kegg-bin/show_pathway?hsa04662+8915+974+975+1147+2353+3725+10892+4792+4793+8503+5880+10451	12	71	701	7257	0.037951	0.275839	1.42078	0.0171184	BCL10//CD79B//CD81//CHUK//FOS//JUN//MALT1//NFKBIA//NFKBIB//PIK3R3//RAC2//VAV3
hsa04151	PI3K-Akt_signaling_pathway	http://www.genome.jp/kegg-bin/show_pathway?hsa04151+894+896+1147+1277+1282+1292+1299+10488+90993+84699+1943+1944+1945+1946+2057+8817+9965+2260+2264+2786+2793+3320+3561+3575+3672+3673+3678+3679+3685+3690+4254+4804+3164+5228+8503+5521+5526+6446+6696+7099+7148+7422+7424	43	342	701	7257	0.0416241	0.29383	1.38066	0.0613409	CCND2//CCND3//CHUK//COL1A1//COL4A1//COL6A2//COL9A3//CREB3//CREB3L1//CREB3L3//EFNA2//EFNA3//EFNA4//EFNA5//EPOR//FGF18//FGF19//FGFR1//FGFR4//GNG4//GNGT2//HSP90AA1//IL2RG//IL7R//ITGA1//ITGA2//ITGA5//ITGA7//ITGAV//ITGB3//KITLG//NGFR//NR4A1//PGF//PIK3R3//PPP2R2B//PPP2R5B//SGK1//SPP1//TLR4//TNXB//VEGFA//VEGFC
hsa05164	Influenza_A	http://www.genome.jp/kegg-bin/show_pathway?hsa05164+6347+3576+23586+3337+5045+3108+3303+3304+3305+3725+3838+5606+5608+4599+4792+4793+10482+55916+4938+4940+8503+7099+7124+7514	24	173	701	7257	0.0436141	0.29383	1.36037	0.0342368	CCL2//CXCL8//DDX58//DNAJB1//FURIN//HLA-DMA//HSPA1A//HSPA1B//HSPA1L//JUN//KPNA2//MAP2K3//MAP2K6//MX1//NFKBIA//NFKBIB//NXF1//NXT2//OAS1//OAS3//PIK3R3//TLR4//TNF//XPO1
hsa00564	Glycerophospholipid_metabolism	http://www.genome.jp/kegg-bin/show_pathway?hsa00564+10555+8525+55224+64850+54947+10162+254531+23175+162466+23659+50487+5321+8611+8613+10908	15	97	701	7257	0.0445713	0.29383	1.35094	0.021398	AGPAT2//DGKZ//ETNK2//ETNPPL//LPCAT2//LPCAT3//LPCAT4//LPIN1//PHOSPHO1//PLA2G15//PLA2G3//PLA2G4A//PLPP1//PLPP3//PNPLA6
hsa05211	Renal_cell_carcinoma	http://www.genome.jp/kegg-bin/show_pathway?hsa05211+9915+1399+112399+3091+3725+10298+56924+8503+7040+7042+7422	11	65	701	7257	0.0453563	0.29383	1.34336	0.0156919	ARNT2//CRKL//EGLN3//HIF1A//JUN//PAK4//PAK6//PIK3R3//TGFB1//TGFB2//VEGFA
hsa05230	Central_carbon_metabolism_in_cancer	http://www.genome.jp/kegg-bin/show_pathway?hsa05230+2260+2539+2744+3091+3098+3417+3939+5223+8503+5315+57103	11	65	701	7257	0.0453563	0.29383	1.34336	0.0156919	FGFR1//G6PD//GLS//HIF1A//HK1//IDH1//LDHA//PGAM1//PIK3R3//PKM//TIGAR
hsa04970	Salivary_secretion	http://www.genome.jp/kegg-bin/show_pathway?hsa04970+147+154+476+478+481+482+483+1469+1472+486+5582+6558+6522+6548	14	90	701	7257	0.0490275	0.296315	1.30956	0.0199715	ADRA1B//ADRB2//ATP1A1//ATP1A3//ATP1B1//ATP1B2//ATP1B3//CST1//CST4//FXYD2//PRKCG//SLC12A2//SLC4A2//SLC9A1
hsa04512	ECM-receptor_interaction	http://www.genome.jp/kegg-bin/show_pathway?hsa04512+1277+1282+1292+1299+2812+3672+3673+3678+3679+3685+3690+6696+7148	13	82	701	7257	0.0496761	0.296315	1.30385	0.0185449	COL1A1//COL4A1//COL6A2//COL9A3//GP1BB//ITGA1//ITGA2//ITGA5//ITGA7//ITGAV//ITGB3//SPP1//TNXB
hsa04925	Aldosterone_synthesis_and_secretion	http://www.genome.jp/kegg-bin/show_pathway?hsa04925+8913+8912+57118+818+10488+90993+84699+1583+3777+3949+3991+3164+5582	13	82	701	7257	0.0496761	0.296315	1.30385	0.0185449	CACNA1G//CACNA1H//CAMK1D//CAMK2G//CREB3//CREB3L1//CREB3L3//CYP11A1//KCNK3//LDLR//LIPE//NR4A1//PRKCG
hsa00604	Glycosphingolipid_biosynthesis-ganglio_series	http://www.genome.jp/kegg-bin/show_pathway?hsa00604+2583+6483+27090+30815	4	15	701	7257	0.0497173	0.296315	1.30349	0.00570613	B4GALNT1//ST3GAL2//ST6GALNAC4//ST6GALNAC6
hsa04666	Fc_gamma_R-mediated_phagocytosis	http://www.genome.jp/kegg-bin/show_pathway?hsa04666+1072+1399+2934+8503+5321+8611+8613+5582+5880+56848+7408+10451+8936+10810	14	91	701	7257	0.0530348	0.30989	1.27544	0.0199715	CFL1//CRKL//GSN//PIK3R3//PLA2G4A//PLPP1//PLPP3//PRKCG//RAC2//SPHK2//VASP//VAV3//WASF1//WASF3
hsa04962	Vasopressin-regulated_water_reabsorption	http://www.genome.jp/kegg-bin/show_pathway?hsa04962+360+397+10488+90993+84699+8655+4905+5878	8	44	701	7257	0.0570441	0.316879	1.24379	0.0114123	AQP3//ARHGDIB//CREB3//CREB3L1//CREB3L3//DYNLL1//NSF//RAB5C
hsa04973	Carbohydrate_digestion_and_absorption	http://www.genome.jp/kegg-bin/show_pathway?hsa04973+476+478+481+482+483+486+3098+8503	8	44	701	7257	0.0570441	0.316879	1.24379	0.0114123	ATP1A1//ATP1A3//ATP1B1//ATP1B2//ATP1B3//FXYD2//HK1//PIK3R3
hsa04350	TGF-beta_signaling_pathway	http://www.genome.jp/kegg-bin/show_pathway?hsa04350+90+25805+652+654+1030+3398+3625+4052+9241+4091+7040+7042+7124	13	84	701	7257	0.0584458	0.316879	1.23325	0.0185449	ACVR1//BAMBI//BMP4//BMP6//CDKN2B//ID2//INHBB//LTBP1//NOG//SMAD6//TGFB1//TGFB2//TNF
hsa04145	Phagosome	http://www.genome.jp/kegg-bin/show_pathway?hsa04145+535+533+527+9114+8992+523+929+1514+3105+3106+3108+3673+3678+3685+3690+4688+22925+5878+7099+7846+7280	21	152	701	7257	0.0584844	0.316879	1.23296	0.0299572	ATP6V0A1//ATP6V0B//ATP6V0C//ATP6V0D1//ATP6V0E1//ATP6V1A//CD14//CTSL//HLA-A//HLA-B//HLA-DMA//ITGA2//ITGA5//ITGAV//ITGB3//NCF2//PLA2R1//RAB5C//TLR4//TUBA1A//TUBB2A
hsa05120	Epithelial_cell_signaling_in_Helicobacter_pylori_infection	http://www.genome.jp/kegg-bin/show_pathway?hsa05120+535+533+527+9114+8992+523+1147+3576+1839+3725+4792	11	68	701	7257	0.059866	0.318476	1.22282	0.0156919	ATP6V0A1//ATP6V0B//ATP6V0C//ATP6V0D1//ATP6V0E1//ATP6V1A//CHUK//CXCL8//HBEGF//JUN//NFKBIA
hsa05224	Breast_cancer	http://www.genome.jp/kegg-bin/show_pathway?hsa05224+324+8313+54567+8817+9965+2260+2353+23401+11211+8322+8324+3725+8202+4854+8503+399694+7481+7474+7475+7477	20	144	701	7257	0.0609166	0.318476	1.21526	0.0285307	APC//AXIN2//DLL4//FGF18//FGF19//FGFR1//FOS//FRAT2//FZD10//FZD4//FZD7//JUN//NCOA3//NOTCH3//PIK3R3//SHC4//WNT11//WNT5A//WNT6//WNT7B
hsa00920	Sulfur_metabolism	http://www.genome.jp/kegg-bin/show_pathway?hsa00920+10380+9061+7263	3	10	701	7257	0.0643242	0.330493	1.19163	0.0042796	BPNT1//PAPSS1//TST
hsa00561	Glycerolipid_metabolism	http://www.genome.jp/kegg-bin/show_pathway?hsa00561+10555+231+57016+8694+8525+2717+23175+4023+8611+8613	10	61	701	7257	0.0656663	0.331671	1.18266	0.0142653	AGPAT2//AKR1B1//AKR1B10//DGAT1//DGKZ//GLA//LPIN1//LPL//PLPP1//PLPP3
hsa04930	Type_II_diabetes_mellitus	http://www.genome.jp/kegg-bin/show_pathway?hsa04930+8913+3098+8660+389692+8503+5315+8651+7124	8	46	701	7257	0.0709937	0.352602	1.14878	0.0114123	CACNA1G//HK1//IRS2//MAFA//PIK3R3//PKM//SOCS1//TNF
hsa01523	Antifolate_resistance	http://www.genome.jp/kegg-bin/show_pathway?hsa01523+1244+10057+1147+8836+4524+7124	6	31	701	7257	0.0726095	0.354715	1.13901	0.0085592	ABCC2//ABCC5//CHUK//GGH//MTHFR//TNF
hsa04550	Signaling_pathways_regulating_pluripotency_of_stem_cells	http://www.genome.jp/kegg-bin/show_pathway?hsa04550+90+324+8313+652+1852+2260+2264+11211+8322+8324+3398+3625+8503+6774+6926+7481+7474+7475+7477	19	139	701	7257	0.0755318	0.358976	1.12187	0.0271041	ACVR1//APC//AXIN2//BMP4//DUSP9//FGFR1//FGFR4//FZD10//FZD4//FZD7//ID2//INHBB//PIK3R3//STAT3//TBX3//WNT11//WNT5A//WNT6//WNT7B
hsa05145	Toxoplasmosis	http://www.genome.jp/kegg-bin/show_pathway?hsa05145+1147+3108+3303+3304+3305+3949+5606+5608+4792+4793+8651+6774+7040+7042+7099+7124	16	113	701	7257	0.0758909	0.358976	1.11981	0.0228245	CHUK//HLA-DMA//HSPA1A//HSPA1B//HSPA1L//LDLR//MAP2K3//MAP2K6//NFKBIA//NFKBIB//SOCS1//STAT3//TGFB1//TGFB2//TLR4//TNF
hsa04915	Estrogen_signaling_pathway	http://www.genome.jp/kegg-bin/show_pathway?hsa04915+10488+90993+84699+2353+1839+3320+3303+3304+3305+3725+4313+4318+8503+399694	14	98	701	7257	0.0874247	0.398642	1.05837	0.0199715	CREB3//CREB3L1//CREB3L3//FOS//HBEGF//HSP90AA1//HSPA1A//HSPA1B//HSPA1L//JUN//MMP2//MMP9//PIK3R3//SHC4
hsa04650	Natural_killer_cell_mediated_cytotoxicity	http://www.genome.jp/kegg-bin/show_pathway?hsa04650+1437+10870+3105+3106+3932+100507436+4277+8503+5582+5880+353091+154064+117157+399694+7124+80328+79465+10451	18	133	701	7257	0.0883356	0.398642	1.05386	0.0256776	CSF2//HCST//HLA-A//HLA-B//LCK//MICA//MICB//PIK3R3//PRKCG//RAC2//RAET1G//RAET1L//SH2D1B//SHC4//TNF//ULBP2//ULBP3//VAV3
hsa00830	Retinol_metabolism	http://www.genome.jp/kegg-bin/show_pathway?hsa00830+1543+56603+29785+1577+1551+8694+10170+157506+51109+195814	10	65	701	7257	0.0925835	0.398642	1.03347	0.0142653	CYP1A1//CYP26B1//CYP2S1//CYP3A5//CYP3A7//DGAT1//DHRS9//RDH10//RDH11//SDR16C5
hsa05131	Shigellosis	http://www.genome.jp/kegg-bin/show_pathway?hsa05131+9474+1147+1399+3576+63916+3678+10459+4792+4793+8936	10	65	701	7257	0.0925835	0.398642	1.03347	0.0142653	ATG5//CHUK//CRKL//CXCL8//ELMO2//ITGA5//MAD2L2//NFKBIA//NFKBIB//WASF1
hsa04066	HIF-1_signaling_pathway	http://www.genome.jp/kegg-bin/show_pathway?hsa04066+818+1906+112399+2027+3091+3098+3162+3939+8503+5582+6774+7076+7099+7422	14	99	701	7257	0.0932735	0.398642	1.03024	0.0199715	CAMK2G//EDN1//EGLN3//ENO3//HIF1A//HK1//HMOX1//LDHA//PIK3R3//PRKCG//STAT3//TIMP1//TLR4//VEGFA
hsa05162	Measles	http://www.genome.jp/kegg-bin/show_pathway?hsa05162+868+894+896+1147+23586+3303+3304+3305+3561+4478+4599+4792+4793+4938+4940+8503+6774+7099	18	134	701	7257	0.0933341	0.398642	1.02996	0.0256776	CBLB//CCND2//CCND3//CHUK//DDX58//HSPA1A//HSPA1B//HSPA1L//IL2RG//MSN//MX1//NFKBIA//NFKBIB//OAS1//OAS3//PIK3R3//STAT3//TLR4
hsa05030	Cocaine_addiction	http://www.genome.jp/kegg-bin/show_pathway?hsa05030+627+1020+10488+90993+84699+2354+3725+8787	8	49	701	7257	0.0954904	0.398642	1.02004	0.0114123	BDNF//CDK5//CREB3//CREB3L1//CREB3L3//FOSB//JUN//RGS9
hsa04918	Thyroid_hormone_synthesis	http://www.genome.jp/kegg-bin/show_pathway?hsa04918+476+478+481+482+483+1081+10488+90993+84699+486+5582	11	74	701	7257	0.0972579	0.398642	1.01207	0.0156919	ATP1A1//ATP1A3//ATP1B1//ATP1B2//ATP1B3//CGA//CREB3//CREB3L1//CREB3L3//FXYD2//PRKCG
hsa05140	Leishmaniasis	http://www.genome.jp/kegg-bin/show_pathway?hsa05140+2353+3108+3725+4688+4792+4793+5743+7040+7042+7099+7124	11	74	701	7257	0.0972579	0.398642	1.01207	0.0156919	FOS//HLA-DMA//JUN//NCF2//NFKBIA//NFKBIB//PTGS2//TGFB1//TGFB2//TLR4//TNF
hsa04261	Adrenergic_signaling_in_cardiomyocytes	http://www.genome.jp/kegg-bin/show_pathway?hsa04261+147+154+476+478+481+482+483+818+10488+90993+84699+1390+486+5521+5526+10411+6324+6548+7170	19	144	701	7257	0.0989916	0.398642	1.0044	0.0271041	ADRA1B//ADRB2//ATP1A1//ATP1A3//ATP1B1//ATP1B2//ATP1B3//CAMK2G//CREB3//CREB3L1//CREB3L3//CREM//FXYD2//PPP2R2B//PPP2R5B//RAPGEF3//SCN1B//SLC9A1//TPM3
hsa05161	Hepatitis_B	http://www.genome.jp/kegg-bin/show_pathway?hsa05161+1147+10488+90993+84699+3576+23586+1960+8772+2353+3725+4318+4792+8503+5582+6774+7040+7042+7099+7124	19	144	701	7257	0.0989916	0.398642	1.0044	0.0271041	CHUK//CREB3//CREB3L1//CREB3L3//CXCL8//DDX58//EGR3//FADD//FOS//JUN//MMP9//NFKBIA//PIK3R3//PRKCG//STAT3//TGFB1//TGFB2//TLR4//TNF

## Sheet: KEGG-DOWN
Column "ID" stands for pathway identifier used in KEGG
Column "Term" stands for the name of the pathway
Column "WebSite"stands for The map's website,the nodes with red frame and red symbol are associated with the DE genes, green nodes have no significance
Column "Count" stands for the count of the DE genes directly associated with the listed pathway
Column "Size" stands for the count of the chosen background population genes associated with the listed pathway
Column "numInt" stands for the total number of the DE genes
Column "numTotal" stands for the total number of background population genes
Column "p_value" stands for the enrichment p-value of the pathway used Fisher exact test
Column "fdr" stands for the false discovery rate of the pathway
Column "Enrichment_Score" stands for the Enrichment Score value of the pathway, it equals "-log10(p_value)"
Column "GeneRatio" stands for the Gene Ratio value of the pathway, it equals "Count/numInt"
Column "Genes" stands for the DE genes associated with the pathway
ID	Term	WebSite	Count	Size	numInt	numTotal	p_value	fdr	Enrichment_Score	GeneRatio	Genes
hsa00670	One_carbon_pool_by_folate	http://www.genome.jp/kegg-bin/show_pathway?hsa00670+160428+471+1719+123263+4522+25902+10797+4548+6472+7298	10	20	432	7257	5.43444e-08	1.57055e-05	7.26484	0.0231481	ALDH1L2//ATIC//DHFR//MTFMT//MTHFD1//MTHFD1L//MTHFD2//MTR//SHMT2//TYMS
hsa00280	Valine_leucine_and_isoleucine_degradation	http://www.genome.jp/kegg-bin/show_pathway?hsa00280+65985+10449+38+4329+501+316+593+1962+11112+3155+3712+56922+64087+84693	14	48	432	7257	4.23591e-07	6.12089e-05	6.37305	0.0324074	AACS//ACAA2//ACAT1//ALDH6A1//ALDH7A1//AOX1//BCKDHA//EHHADH//HIBADH//HMGCL//IVD//MCCC1//MCCC2//MCEE
hsa03460	Fanconi_anemia_pathway	http://www.genome.jp/kegg-bin/show_pathway?hsa03460+545+641+672+83990+146956+2067+2175+2178+55215+55120+4292+80010+116028+9894	14	54	432	7257	2.04862e-06	0.00019735	5.68854	0.0324074	ATR//BLM//BRCA1//BRIP1//EME1//ERCC1//FANCA//FANCE//FANCI//FANCL//MLH1//RMI1//RMI2//TELO2
hsa03440	Homologous_recombination	http://www.genome.jp/kegg-bin/show_pathway?hsa03440+580+641+672+79184+83990+146956+4361+5425+10714+5892+8438+7516	12	41	432	7257	2.76022e-06	0.000199426	5.55906	0.0277778	BARD1//BLM//BRCA1//BRCC3//BRIP1//EME1//MRE11//POLD2//POLD3//RAD51D//RAD54L//XRCC2
hsa01100	Metabolic_pathways	http://www.genome.jp/kegg-bin/show_pathway?hsa01100+10449+38+50+122970+51703+6296+95+128+55750+191+221+7915+4329+501+144245+240+316+440+445+471+517+90423+593+790+874+875+102724560+55349+10229+51084+51380+55790+1503+56474+1606+8527+1719+1723+9249+10901+317749+54344+1962+2053+81889+2235+2271+2548+2673+8833+9380+2937+9563+138050+11112+3141+3155+112817+7923+3418+414328+3712+2531+51056+4129+4144+56922…	112	1270	432	7257	3.85178e-06	0.000222633	5.41434	0.259259	ACAA2//ACAT1//ACO2//ACOT4//ACSL5//ACSM3//ACY1//ADH5//AGK//AHCY//ALDH3B1//ALDH5A1//ALDH6A1//ALDH7A1//ALG10B//ALOX5//AOX1//ASNS//ASS1//ATIC//ATP5G2//ATP6V1E2//BCKDHA//CAD//CBR3//CBS//CBSL//CHDH//COQ7//CRYL1//CSAD//CSGALNACT1//CTPS1//CTPS2//DGKA//DGKD//DHFR//DHODH//DHRS3//DHRS4//DHRS4L2//DPM3//EHHADH//EPHX2//FAHD1//FECH//FH//GAA//GFPT1//GMPS//GRHPR//GSS//H6PD//HGSNAT//HIBADH//HLCS//HMGCL//HOGA1//HSD…
hsa03030	DNA_replication	http://www.genome.jp/kegg-bin/show_pathway?hsa03030+3978+4171+4172+4173+4174+4175+5425+10714+5557+79621	10	36	432	7257	3.15013e-05	0.00151731	4.50167	0.0231481	LIG1//MCM2//MCM3//MCM4//MCM5//MCM6//POLD2//POLD3//PRIM1//RNASEH2B
hsa03430	Mismatch_repair	http://www.genome.jp/kegg-bin/show_pathway?hsa03430+9156+3978+4292+27030+4437+5425+10714	7	23	432	7257	0.000268455	0.0110834	3.57113	0.0162037	EXO1//LIG1//MLH1//MLH3//MSH3//POLD2//POLD3
hsa03410	Base_excision_repair	http://www.genome.jp/kegg-bin/show_pathway?hsa03410+3978+8930+143+5425+10714+27343+7374+7515	8	33	432	7257	0.000547499	0.0197784	3.26162	0.0185185	LIG1//MBD4//PARP4//POLD2//POLD3//POLL//UNG//XRCC1
hsa01230	Biosynthesis_of_amino_acids	http://www.genome.jp/kegg-bin/show_pathway?hsa01230+50+95+501+445+875+102724560+3418+4144+4548+5211+29920+6472	12	75	432	7257	0.00144173	0.0462956	2.84112	0.0277778	ACO2//ACY1//ALDH7A1//ASS1//CBS//CBSL//IDH2//MAT2A//MTR//PFKL//PYCR2//SHMT2
hsa00970	Aminoacyl-tRNA_biosynthesis	http://www.genome.jp/kegg-bin/show_pathway?hsa00970+16+1615+10056+2617+3376+51520+123263+4677+6301+10352+8565	11	66	432	7257	0.00160406	0.0463574	2.79478	0.025463	AARS//DARS//FARSB//GARS//IARS//LARS//MTFMT//NARS//SARS//WARS2//YARS
hsa00260	Glycine_serine_and_threonine_metabolism	http://www.genome.jp/kegg-bin/show_pathway?hsa00260+501+875+102724560+55349+9380+4129+6472+63826	8	40	432	7257	0.00210168	0.0552168	2.67743	0.0185185	ALDH7A1//CBS//CBSL//CHDH//GRHPR//MAOB//SHMT2//SRR
hsa01200	Carbon_metabolism	http://www.genome.jp/kegg-bin/show_pathway?hsa01200+38+50+128+4329+1962+2098+2271+9563+3418+414328+84693+10873+5211+6472+8801	15	114	432	7257	0.00296312	0.0713618	2.52825	0.0347222	ACAT1//ACO2//ADH5//ALDH6A1//EHHADH//ESD//FH//H6PD//IDH2//IDNK//MCEE//ME3//PFKL//SHMT2//SUCLG2
hsa00630	Glyoxylate_and_dicarboxylate_metabolism	http://www.genome.jp/kegg-bin/show_pathway?hsa00630+38+50+9380+112817+84693+6472	6	28	432	7257	0.005274	0.10887	2.27786	0.0138889	ACAT1//ACO2//GRHPR//HOGA1//MCEE//SHMT2
hsa00650	Butanoate_metabolism	http://www.genome.jp/kegg-bin/show_pathway?hsa00650+65985+38+6296+7915+1962+3155	6	28	432	7257	0.005274	0.10887	2.27786	0.0138889	AACS//ACAT1//ACSM3//ALDH5A1//EHHADH//HMGCL
hsa03018	RNA_degradation	http://www.genome.jp/kegg-bin/show_pathway?hsa03018+246175+196513+115752+56915+118460+23016+11340+51691+8761+9924+5211	11	78	432	7257	0.00611767	0.117867	2.21341	0.025463	CNOT6L//DCP1B//DIS3L//EXOSC5//EXOSC6//EXOSC7//EXOSC8//LSM8//PABPC4//PAN2//PFKL
hsa00240	Pyrimidine_metabolism	http://www.genome.jp/kegg-bin/show_pathway?hsa00240+790+1503+56474+1723+5425+10714+5433+84265+5557+6240+6241+7298+7371	13	101	432	7257	0.00662308	0.119629	2.17894	0.0300926	CAD//CTPS1//CTPS2//DHODH//POLD2//POLD3//POLR2D//POLR3GL//PRIM1//RRM1//RRM2//TYMS//UCK2
hsa00620	Pyruvate_metabolism	http://www.genome.jp/kegg-bin/show_pathway?hsa00620+38+98+501+2271+9380+10873+5106	7	39	432	7257	0.00737842	0.125433	2.13204	0.0162037	ACAT1//ACYP2//ALDH7A1//FH//GRHPR//ME3//PCK2
hsa01523	Antifolate_resistance	http://www.genome.jp/kegg-bin/show_pathway?hsa01523+8714+471+1719+3551+6472+7298	6	31	432	7257	0.0088634	0.142307	2.0524	0.0138889	ABCC3//ATIC//DHFR//IKBKB//SHMT2//TYMS
hsa00640	Propanoate_metabolism	http://www.genome.jp/kegg-bin/show_pathway?hsa00640+38+4329+593+1962+84693+8801	6	32	432	7257	0.010375	0.157809	1.98401	0.0138889	ACAT1//ALDH6A1//BCKDHA//EHHADH//MCEE//SUCLG2
hsa00450	Selenocompound_metabolism	http://www.genome.jp/kegg-bin/show_pathway?hsa00450+4548+9060+10587+114112	4	17	432	7257	0.0158557	0.220102	1.79982	0.00925926	MTR//PAPSS2//TXNRD2//TXNRD3
hsa00250	Alanine_aspartate_and_glutamate_metabolism	http://www.genome.jp/kegg-bin/show_pathway?hsa00250+7915+440+445+790+2673+56954	6	35	432	7257	0.0159936	0.220102	1.79605	0.0138889	ALDH5A1//ASNS//ASS1//CAD//GFPT1//NIT2
hsa03420	Nucleotide_excision_repair	http://www.genome.jp/kegg-bin/show_pathway?hsa03420+2067+2967+3978+5425+10714+7507+7508	7	47	432	7257	0.0200736	0.263694	1.69738	0.0162037	ERCC1//GTF2H3//LIG1//POLD2//POLD3//XPA//XPC
hsa03013	RNA_transport	http://www.genome.jp/kegg-bin/show_pathway?hsa03013+1207+23191+1968+8661+8664+1974+1975+25929+57122+23225+23636+8761+5411+138716+7175+51095+65110	17	171	432	7257	0.0254592	0.3199	1.59416	0.0393519	CLNS1A//CYFIP1//EIF2S3//EIF3A//EIF3D//EIF4A2//EIF4B//GEMIN5//NUP107//NUP210//NUP62//PABPC4//PNN//RPP25L//TPR//TRNT1//UPF3A
hsa00020	Citrate_cycle_(TCA_cycle)	http://www.genome.jp/kegg-bin/show_pathway?hsa00020+50+2271+3418+5106+8801	5	30	432	7257	0.0303181	0.36508	1.5183	0.0115741	ACO2//FH//IDH2//PCK2//SUCLG2
hsa04110	Cell_cycle	http://www.genome.jp/kegg-bin/show_pathway?hsa04110+545+1021+1871+4171+4172+4173+4174+4175+5591+5933+6502+8243+27127	13	124	432	7257	0.0325236	0.375973	1.4878	0.0300926	ATR//CDK6//E2F3//MCM2//MCM3//MCM4//MCM5//MCM6//PRKDC//RBL1//SKP2//SMC1A//SMC1B
hsa03450	Non-homologous_end-joining	http://www.genome.jp/kegg-bin/show_pathway?hsa03450+4361+27343+5591	3	13	432	7257	0.0383227	0.425972	1.41654	0.00694444	MRE11//POLL//PRKDC
hsa00071	Fatty_acid_degradation	http://www.genome.jp/kegg-bin/show_pathway?hsa00071+10449+38+51703+128+501+1962	6	44	432	7257	0.0445132	0.466495	1.35151	0.0138889	ACAA2//ACAT1//ACSL5//ADH5//ALDH7A1//EHHADH
hsa00750	Vitamin_B6_metabolism	http://www.genome.jp/kegg-bin/show_pathway?hsa00750+316+55163	2	6	432	7257	0.0451967	0.466495	1.34489	0.00462963	AOX1//PNPO
hsa00270	Cysteine_and_methionine_metabolism	http://www.genome.jp/kegg-bin/show_pathway?hsa00270+191+875+102724560+2937+4144+4548	6	45	432	7257	0.048895	0.487264	1.31074	0.0138889	AHCY//CBS//CBSL//GSS//MAT2A//MTR
hsa00350	Tyrosine_metabolism	http://www.genome.jp/kegg-bin/show_pathway?hsa00350+128+221+316+81889+4129	5	35	432	7257	0.0542978	0.523069	1.26522	0.0115741	ADH5//ALDH3B1//AOX1//FAHD1//MAOB
hsa04146	Peroxisome	http://www.genome.jp/kegg-bin/show_pathway?hsa04146+51703+10901+1962+2053+3155+3418+5189+5195+5827	9	83	432	7257	0.0573548	0.534694	1.24143	0.0208333	ACSL5//DHRS4//EHHADH//EPHX2//HMGCL//IDH2//PEX1//PEX14//PXMP2
hsa00310	Lysine_degradation	http://www.genome.jp/kegg-bin/show_pathway?hsa00310+38+501+1962+387893+7468+85007+80854	7	59	432	7257	0.0595368	0.537692	1.22521	0.0162037	ACAT1//ALDH7A1//EHHADH//KMT5A//NSD2//PHYKPL//SETD7
hsa01212	Fatty_acid_metabolism	http://www.genome.jp/kegg-bin/show_pathway?hsa01212+10449+38+51703+1962+3992+51102	6	48	432	7257	0.0635856	0.556856	1.19664	0.0138889	ACAA2//ACAT1//ACSL5//EHHADH//FADS1//MECR
hsa00330	Arginine_and_proline_metabolism	http://www.genome.jp/kegg-bin/show_pathway?hsa00330+501+112817+112849+51056+4129+29920	6	49	432	7257	0.0690008	0.586507	1.16115	0.0138889	ALDH7A1//HOGA1//L3HYPDH//LAP3//MAOB//PYCR2
hsa00380	Tryptophan_metabolism	http://www.genome.jp/kegg-bin/show_pathway?hsa00380+38+501+316+1962+4129	5	40	432	7257	0.086734	0.70581	1.06181	0.0115741	ACAT1//ALDH7A1//AOX1//EHHADH//MAOB
hsa01210	2-Oxocarboxylic_acid_metabolism	http://www.genome.jp/kegg-bin/show_pathway?hsa01210+50+95+3418	3	18	432	7257	0.0879209	0.70581	1.05591	0.00694444	ACO2//ACY1//IDH2
hsa00480	Glutathione_metabolism	http://www.genome.jp/kegg-bin/show_pathway?hsa00480+79017+2937+3418+51056+6240+6241	6	54	432	7257	0.0999277	0.760421	1.00031	0.0138889	GGCT//GSS//IDH2//LAP3//RRM1//RRM2
hsa00030	Pentose_phosphate_pathway	http://www.genome.jp/kegg-bin/show_pathway?hsa00030+51071+9563+414328+5211	4	30	432	7257	0.0999861	0.760421	1.00006	0.00925926	DERA//H6PD//IDNK//PFKL
