# Supplementary material for: Transcriptome profiling of A549 non-small cell lung cancer cells in response to Trichinella spiralis muscle larvae excretory/secretory products
Source: Front Vet Sci. 2023 Jul 31;10:1208538. doi: 10.3389/fvets.2023.1208538 (PMC10433203; doi:10.3389/fvets.2023.1208538)
Supplement: Supplementary file 5 [file Table_5.XLSX]

## Sheet: novel_gene
Column A: Gene_id, The name of novel gene identifier given by StringTie. Column B: Locus, The genomic coordinates of novel gene. Column C: Strand, The strand of novel gene. Column D: Length, The length of novel gene. Column E ~ J: FPKM, The FPKM of novel gene in samples.
Novel Gene Information				FPKM
Gene_id	Locus	Strand	Length	control-1	control-2	control-3	test-1	test-2	test-3
MSTRG.2	GL000191.1:29049-33237	+	4189	18.4086	0.439219	16.7533	18.5484	1.12438	23.4716
MSTRG.7	GL000191.1:34234-52852	-	18619	3.39477	3.20169	2.52385	5.90108	2.88662	8.12819
MSTRG.1	GL000192.1:544678-545093	-	416	0.06419	0.278993	1.73098	0.885492	1.16101	1.15288
MSTRG.3	GL000193.1:73408-79976	-	6569	2.44267	2.29619	1.81085	2.37366	2.28904	3.19511
MSTRG.6	GL000194.1:25968-115086	-	89119	3.42635	3.29075	4.03589	1.96679	2.18567	3.68157
MSTRG.8	GL000195.1:29244-32197	-	2954	0.930901	0.7207	1.12021	0.517128	0.296848	0.705974
MSTRG.9	GL000195.1:33654-34623	-	970	0.590386	0.648906	0.727523	0.557804	0.200132	1.44412
MSTRG.16	GL000195.1:42939-86700	-	43762	8.84243	7.25579	6.2728	6.63704	4.66807	7.43909
MSTRG.12	GL000195.1:137880-149519	+	11640	19.3423	16.711	15.3641	5.48942	5.37022	7.20325
MSTRG.13	GL000195.1:171010-172995	+	1986	1.37096	1.30233	1.37773	0.345056	0.198895	0.84526
MSTRG.14	GL000195.1:173587-176886	+	3300	1.67708	1.30297	1.70609	0.463268	0.326409	1.16148
MSTRG.17	GL000205.1:33830-61394	+	27565	4.96586	7.13785	6.48417	1.95271	2.27646	2.87878
MSTRG.10	GL000205.1:65979-84962	+	18984	1.7533	1.66136	1.72116	0.59045	0.23431	1.4479
MSTRG.11	GL000206.1:33002-38910	+	5909	1.35665	1.33188	1.09982	1.14652	0.850147	1.23885
MSTRG.15	GL000209.1:86528-97793	+	11266	5.75418	5.59499	6.11008	6.93889	6.09463	6.00494
MSTRG.18	GL000212.1:24070-66593	+	42524	1.56531	1.43312	1.35524	1.86607	2.09161	2.52163
MSTRG.23	GL000212.1:127581-127823	+	243	2.86678	5.55669	5.72347	3.65035	4.38422	4.15433
MSTRG.24	GL000212.1:128310-128511	+	202	0.45196	0.772784	1.33495	0.67787	0.852479	0.432884
MSTRG.25	GL000218.1:46032-92264	-	46233	3.39859	3.04656	3.19715	1.0848	1.02705	1.78353
MSTRG.27	GL000219.1:73987-99664	-	25678	5.61005	4.60832	5.06629	3.44711	3.13942	3.50031
MSTRG.26	GL000220.1:42689-64395	+	21707	1.89093	1.69432	1.84555	0.366578	0.186398	0.767712
MSTRG.28	GL000220.1:72790-75867	+	3078	1.00659	1.07986	0.854764	0.569942	0.551985	1.454
MSTRG.38	GL000220.1:103733-104525	+	793	1.96952	2.20229	0.862457	0.588125	1.12801	1.08131
MSTRG.39	GL000220.1:105865-154898	+	49034	188.552	1018.44	742.147	1333.44	882.215	829.286
MSTRG.37	GL000220.1:113045-161802	+	48758	206.86	292.2	304.039	358.401	317.036	250.961
MSTRG.41	GL000220.1:113321-161795	-	48475	4.49666	11.9387	7.42224	12.6323	12.61	9.01831
MSTRG.43	GL000220.1:138624-148127	-	9504	2.55603	3.89389	2.48442	1.64307	1.26679	2.43682
MSTRG.29	GL000222.1:11827-23696	+	11870	2.37279	1.86988	1.94964	0.891929	0.478853	1.5173
MSTRG.32	GL000223.1:1-1499	+	1499	1.1877	0.811745	1.18374	0.612925	0.462564	1.15878
MSTRG.31	GL000223.1:1-25615	-	25615	2.30439	1.20169	1.59558	1.35448	1.9568	1.39427
MSTRG.30	GL000223.1:50070-50525	+	456	0.841595	0.207575	1.17182	0.488439	0.918402	1.14609
MSTRG.33	GL000223.1:79019-119661	-	40643	0	0	1.96569	0.058828	1.59851	0
MSTRG.34	GL000223.1:149783-165098	+	15316	0.782886	1.22981	0.928567	1.68223	1.6262	1.99671
MSTRG.35	GL000234.1:27154-27406	-	253	1.46552	1.08454	0.103359	0.093228	0.328184	0.068672
MSTRG.36	GL000234.1:35645-35872	-	228	1.15457	0.700779	0.441836	0.838019	0.1231	0.745268
MSTRG.47	GL000241.1:12849-36896	-	24048	9.70833	9.00365	9.98426	7.46746	7.37137	7.05422
MSTRG.45	GL000242.1:23611-26484	+	2874	2.36278	2.30308	2.26752	1.74703	1.79374	1.6362
MSTRG.46	GL000247.1:54-670	-	617	1.33624	0.968431	0.752501	0.929704	0.513488	0.526837
MSTRG.48	GL000247.1:15384-18436	-	3053	1.6134	1.50041	1.62135	1.14718	1.03823	1.30336
MSTRG.50	chr1:14359-29440	-	15082	3.2259	3.98752	3.05886	2.61991	2.57725	4.25489
MSTRG.55	chr1:137490-139942	+	2453	2.55027	1.79639	2.22429	0.750435	0.309882	1.87333
MSTRG.60	chr1:564654-565453	-	800	5.24286	11.9675	11.1822	5.69515	7.15213	5.63838
MSTRG.61	chr1:565007-565869	+	863	121.332	181.707	217.117	202.263	238.89	266.282
MSTRG.62	chr1:566132-567996	+	1865	164.029	223.045	207.001	173.041	207.174	108.659
MSTRG.63	chr1:567101-568070	-	970	1.14906	2.16013	1.28714	2.42118	2.88604	2.02136
MSTRG.66	chr1:569226-569568	-	343	12.3045	23.7452	27.664	21.8362	19.2063	17.5189
MSTRG.80	chr1:859308-879961	+	20654	1.70339	2.45985	1.33858	2.13	2.3022	2.47532
MSTRG.82	chr1:879584-894636	-	15053	23.035	22.7052	22.0171	22.8221	25.6359	21.4596
MSTRG.83	chr1:880072-880992	+	921	1.12552	1.66525	0.558744	0.838883	0.991775	0.979939
MSTRG.84	chr1:892331-894623	+	2293	0.392098	0.559485	0.533009	0.289964	1.24569	0.510453
MSTRG.79	chr1:898107-901092	+	2986	2.35329	2.52078	2.49638	2.67088	2.74951	3.24642
MSTRG.86	chr1:935098-935491	+	394	1.33102	1.72684	2.42927	0.663258	1.55864	0.9383
MSTRG.89	chr1:943843-944848	+	1006	1.36432	0.933768	1.59573	0.436675	0.336541	1.22557
MSTRG.92	chr1:990430-990635	-	206	1.6361	0.955366	0	0.45031	0.80423	0.275262
MSTRG.93	chr1:993848-1001836	+	7989	3.55183	3.79136	4.48041	5.60781	6.0226	5.88359
MSTRG.95	chr1:1001074-1004439	-	3366	1.11729	0.85608	1.30487	0.546247	0.136649	1.3753
MSTRG.96	chr1:1017526-1051736	-	34211	1.57818	1.96931	1.97972	2.07867	1.99826	2.87674
MSTRG.97	chr1:1152312-1167348	-	15037	12.9727	17.562	13.0617	16.4759	15.6375	12.99
MSTRG.98	chr1:1152725-1154269	+	1545	0.351283	0.917686	0.536092	0.237327	1.02866	0.304404
MSTRG.123	chr1:1228250-1238640	-	10391	1.87532	2.02073	1.84462	2.50487	2.29503	3.34285
MSTRG.124	chr1:1243975-1246449	+	2475	6.26397	6.62601	5.52691	4.75544	6.62355	5.54957
MSTRG.126	chr1:1251202-1253967	+	2766	1.05883	1.70601	0.880268	1.83377	1.98428	1.35833
MSTRG.106	chr1:1270827-1271247	+	421	0.595279	1.24791	0.69284	0.857765	1.03658	0.399078
MSTRG.107	chr1:1271562-1273558	+	1997	0.436592	0.711308	1.0856	1.2794	1.11199	0.717741
MSTRG.108	chr1:1273749-1274760	+	1012	0.752739	1.29222	0.125016	0.691027	0.571726	0.989485
MSTRG.109	chr1:1275817-1284291	+	8475	1.9408	2.12742	0.607145	1.69455	1.49605	1.22337
MSTRG.101	chr1:1286802-1290601	+	3800	0.434543	0.356837	0.499398	0.50027	0.295746	1.14312
MSTRG.103	chr1:1292463-1297362	+	4900	0.429968	0.423623	0.559316	0.787333	0.524739	1.71986
MSTRG.111	chr1:1309121-1309729	+	609	0.929972	1.75943	0.734918	1.39749	1.58933	0.720807
MSTRG.112	chr1:1310364-1310588	+	225	0.085001	0.825324	0.557709	0.552673	1.63982	0.574465
MSTRG.113	chr1:1322093-1333667	-	11575	11.2664	10.3967	10.68	6.43123	3.68007	8.03483
MSTRG.116	chr1:1342290-1345998	+	3709	3.02235	3.24556	3.39463	2.12263	1.70065	2.82493
MSTRG.120	chr1:1385069-1470065	+	84997	9.2234	9.31311	8.88841	6.5661	7.10932	6.70738
MSTRG.121	chr1:1406593-1407061	-	469	3.09611	2.71057	2.83911	1.19215	1.89546	1.07389
MSTRG.122	chr1:1412693-1417984	-	5292	0.881833	1.13812	0.504748	0.667403	0.259746	0.289557
MSTRG.142	chr1:1571100-1677476	-	106377	8.16181	7.06204	8.7019	7.05961	7.09043	8.28047
MSTRG.145	chr1:1623127-1625720	+	2594	1.28566	1.13335	1.13264	0.406461	0.395713	0.475991
MSTRG.146	chr1:1630063-1711401	-	81339	9.41847	11.3504	7.30366	7.41946	8.10974	12.2299
MSTRG.148	chr1:1640500-1647900	+	7401	1.42861	2.26141	1.31191	1.75082	1.97809	2.43104
MSTRG.150	chr1:1676257-1677109	+	853	1.49506	0.787385	0.7159	0.378677	0.179598	0.280975
MSTRG.151	chr1:1678701-1679067	+	367	0.988659	0.475419	1.29332	0.404737	0.287316	0.162137
MSTRG.130	chr1:1716725-1822405	-	105681	38.8336	40.6518	39.4569	31.2057	31.3193	31.6944
MSTRG.131	chr1:1822265-1822494	+	230	1.12649	1.02857	1.46202	1.17851	2.13127	2.7468
MSTRG.135	chr1:1981942-2116832	+	134891	4.83154	5.72787	4.03534	2.53475	2.91695	2.6626
MSTRG.138	chr1:2115900-2126213	-	10314	0.838283	0.882689	0.819031	1.08838	1.24674	1.31791
MSTRG.133	chr1:2160134-2241558	+	81425	8.69713	8.77812	8.29147	10.5062	9.76185	10.2523
MSTRG.134	chr1:2235300-2235537	-	238	0	0.243826	0	0.377792	1.17272	0
MSTRG.157	chr1:2297352-2298049	-	698	1.11087	1.16588	0.661934	0.434532	0.107227	0.080417
MSTRG.158	chr1:2299354-2300322	-	969	1.44956	0.842412	0.853607	0.220215	0.179822	0.175357
MSTRG.159	chr1:2300796-2302533	-	1738	1.17246	0.928872	1.01162	0.166133	0.097229	0.368883
MSTRG.161	chr1:2323329-2334666	+	11338	17.4527	17.3811	16.6318	11.7401	12.4798	12.6468
MSTRG.162	chr1:2334777-2335051	-	275	1.1731	0.813132	1.09578	0.753509	1.67195	0.836588
MSTRG.163	chr1:2336277-2345236	-	8960	3.30481	3.17658	3.56316	2.15936	1.99859	2.23537
MSTRG.165	chr1:2440234-2458036	-	17803	2.70898	3.04861	2.86118	1.75269	2.27224	2.13182
MSTRG.168	chr1:2487230-2495268	+	8039	1.63384	1.86083	1.85244	0.658129	0.657031	0.941912
MSTRG.176	chr1:3371112-3397677	+	26566	9.37994	9.97836	9.96808	12.311	15.0629	12.4682
MSTRG.177	chr1:3381895-3386618	-	4724	0.814454	1.0276	0.87877	0.713514	0.534344	1.14834
MSTRG.178	chr1:3400787-3404191	+	3405	3.62749	3.62507	3.48419	1.36607	1.40127	1.78808
MSTRG.179	chr1:3404514-3414285	-	9772	3.81868	4.86584	4.97811	2.06053	1.61888	3.0818
MSTRG.189	chr1:3652165-3663886	-	11722	1.23645	1.2385	1.18498	1.30133	1.39624	1.21538
MSTRG.184	chr1:3703454-3703800	+	347	0.256341	0.583093	0.20332	0.960294	1.27617	0.94746
MSTRG.195	chr1:3728654-3773762	-	45109	4.75569	3.91988	4.19086	2.74441	3.11066	3.10868
MSTRG.197	chr1:3777660-3779446	+	1787	0.490696	0.470869	0.456681	0.580847	0.528225	1.42546
MSTRG.192	chr1:5106946-5107330	+	385	1.03588	1.34929	1.49127	3.1069	2.51589	5.0335
MSTRG.191	chr1:5175511-5176167	+	657	0.740387	1.02257	0.960605	2.38924	1.17926	7.39889
MSTRG.201	chr1:6086380-6146420	+	60041	6.92246	8.17241	7.80631	6.27269	6.40654	5.65035
MSTRG.204	chr1:6246197-6259638	+	13442	1.52085	1.96118	2.4255	1.45932	2.098	1.31555
MSTRG.203	chr1:6246675-6266024	-	19350	93.2501	92.5323	105.372	61.3653	62.3942	60.1275
MSTRG.205	chr1:6270998-6281359	+	10362	1.91592	2.34967	2.08969	0.680838	0.717664	1.44744
MSTRG.206	chr1:6281253-6296032	-	14780	10.8465	20.2173	10.5051	9.99279	11.1961	12.8742
MSTRG.207	chr1:6283498-6285010	+	1513	1.94546	1.31301	1.67638	0.50451	0.395097	0.818708
MSTRG.198	chr1:6307407-6321132	-	13726	1.27336	1.31428	1.2739	2.35231	2.37905	3.66758
MSTRG.210	chr1:6324573-6341337	+	16765	0.24727	0.597009	0.430202	0.985959	1.1271	0.781772
MSTRG.211	chr1:6354982-6453422	+	98441	0.410161	1.06627	0.614021	0.861377	1.07571	0.81989
MSTRG.216	chr1:6466784-6467077	-	294	0.162016	0	0	0.03446	0.517102	1.25074
MSTRG.217	chr1:6475292-6484595	-	9304	5.15972	4.44973	2.46288	4.37906	4.14158	4.63973
MSTRG.220	chr1:6491565-6614595	-	123031	4.02768	3.93788	3.76797	4.96903	4.22513	5.55921
MSTRG.222	chr1:6521211-6556742	-	35532	1.14569	1.04347	1.2677	1.58156	1.778	2.37964
MSTRG.213	chr1:6640061-6649220	+	9160	2.52048	2.1963	2.26168	3.63672	3.41469	4.02435
MSTRG.225	chr1:6685290-6693428	+	8139	2.74755	3.27793	3.26546	3.17953	3.97598	3.1881
MSTRG.229	chr1:6845540-6947847	+	102308	1.75758	1.96949	2.46691	3.58888	3.32071	2.67745
MSTRG.236	chr1:7547449-7551373	-	3925	0.222764	0.147997	0.157796	0.578633	0.603444	1.31258
MSTRG.243	chr1:7975837-8000916	-	25080	1.02141	0.991993	1.06339	2.34582	2.48552	2.28851
MSTRG.250	chr1:8075571-8086358	+	10788	0.454697	0	0	0.31317	1.90804	0.505383
MSTRG.255	chr1:8414153-8877524	-	463372	6.48356	6.2013	5.54418	6.2296	6.22706	7.11489
MSTRG.256	chr1:8419828-8420046	+	219	0.245512	0.450466	0.634695	0.276122	1.21484	1.6721
MSTRG.265	chr1:8877886-8938767	+	60882	1.76619	3.39621	1.97294	2.51559	4.21833	1.93162
MSTRG.251	chr1:9160400-9189162	-	28763	2.42422	2.6927	3.05743	1.46979	2.19119	2.65857
MSTRG.252	chr1:9294821-9331396	+	36576	0.652162	1.81207	1.88346	0.437939	0.653319	1.00518
MSTRG.253	chr1:9374567-9429486	+	54920	6.31341	6.99574	6.17135	12.29	12.3631	5.67498
MSTRG.254	chr1:9416128-9416423	-	296	0	0.193435	0	0.273817	1.14837	0.183182
MSTRG.270	chr1:9599541-9642814	+	43274	4.06484	4.23452	3.69988	6.35043	7.2924	5.48246
MSTRG.273	chr1:9648980-9674907	+	25928	2.01785	2.1453	1.47046	2.16974	1.83077	2.29266
MSTRG.274	chr1:9676348-9680417	+	4070	0.578651	0.659819	0.754318	1.34481	1.28696	1.36179
MSTRG.272	chr1:9680874-9682366	+	1493	0.297287	0.606218	0.549901	0.98373	1.58158	1.08518
MSTRG.277	chr1:9748234-9788977	+	40744	4.70058	3.61862	4.6073	5.96394	5.86577	5.82933
MSTRG.281	chr1:9789086-9884042	-	94957	21.8183	22.0701	21.5601	33.0177	32.3393	28.9759
MSTRG.282	chr1:9790530-9793061	+	2532	0.669763	0.870649	0.300393	1.14729	1.58324	1.27216
MSTRG.286	chr1:9986354-10003465	-	17112	6.84931	7.60069	6.22782	6.86504	6.52551	5.93238
MSTRG.288	chr1:10003486-10416787	+	413302	2.00796	2.18562	2.00659	1.2016	1.00624	1.19639
MSTRG.298	chr1:10270577-10441960	+	171384	5.58518	4.77206	4.94238	6.05018	5.7666	5.76031
MSTRG.284	chr1:10459101-10468197	+	9097	51.0956	56.6981	49.4514	61.8397	66.0618	56.8686
MSTRG.285	chr1:10460498-10477066	-	16569	0.538579	0.547481	0.340977	0.228943	1.5765	0.52731
MSTRG.303	chr1:10490569-10511716	+	21148	4.62229	4.62208	3.69358	4.24131	4.13468	3.90581
MSTRG.304	chr1:10508933-10513231	-	4299	0.616867	0.467772	0.648899	0.833663	0.390132	1.7485
MSTRG.305	chr1:10513521-10532583	-	19063	15.893	14.4304	15.053	11.4218	10.7407	12.7719
MSTRG.307	chr1:10535039-10641864	+	106826	2.90566	3.29625	3.44587	2.05589	2.0573	2.46337
MSTRG.308	chr1:10620367-10622985	-	2619	0.816432	1.1451	0.699532	0.053613	0.071965	0.36588
MSTRG.309	chr1:10623986-10624955	-	970	0.922222	1.098	0.918586	0.195672	0	0.297209
MSTRG.311	chr1:10696668-10754536	-	57869	1.4087	1.4976	1.20759	2.51021	2.52206	1.98927
MSTRG.317	chr1:11073785-11085260	+	11476	9.8799	7.54099	7.8975	5.88386	9.04201	8.05235
MSTRG.314	chr1:11143872-11159916	-	16045	13.0361	13.1204	12.6892	10.9685	10.8352	11.6816
MSTRG.329	chr1:11708424-11714836	-	6413	12.5114	12.9222	10.4154	28.2631	30.7673	25.6203
MSTRG.330	chr1:11710582-11723381	+	12800	2.62288	2.23923	2.45344	5.27385	5.37587	6.17485
MSTRG.333	chr1:11740410-11741259	+	850	1.21721	0.946967	0.586232	0.982406	2.47794	1.70633
MSTRG.338	chr1:11850406-11863571	-	13166	1.52534	1.82411	1.65338	3.48007	3.46373	3.74441
MSTRG.339	chr1:11866317-11903183	+	36867	2.45614	2.74493	1.85981	2.24519	2.29114	3.74882
MSTRG.335	chr1:11979653-11986480	-	6828	13.6667	12.1831	11.9394	14.4645	20.6208	18.1992
MSTRG.341	chr1:12025509-12035593	+	10085	13.4984	11.6312	12.5478	19.3891	16.9468	16.4726
MSTRG.343	chr1:12040331-12041857	-	1527	1.15404	0.768041	0.989209	0.162758	0.05629	0.111903
MSTRG.342	chr1:12040356-12073565	+	33210	35.4492	35.3712	35.498	27.5244	30.3226	25.2352
MSTRG.351	chr1:12371583-12572099	+	200517	2.78567	2.59657	2.54401	2.67901	2.24645	2.34941
MSTRG.348	chr1:13348230-13348559	-	330	0	0	0	0.571722	0.276674	1.23041
MSTRG.361	chr1:15480248-15541407	-	61160	0	0	0	0.39719	0.679518	1.4432
MSTRG.367	chr1:15643626-15649556	-	5931	0.836296	1.33528	0.871029	0.089569	0.71031	0.518974
MSTRG.364	chr1:15736386-15736903	-	518	0.946369	0.918258	1.22547	0.798835	1.20444	1.09246
MSTRG.365	chr1:15736391-15756839	+	20449	45.0205	42.7667	42.898	48.9722	55.5264	46.0603
MSTRG.371	chr1:15816230-15816505	-	276	1.37501	0.285948	1.39258	0.440488	0.432892	0.555474
MSTRG.376	chr1:15896287-15911605	-	15319	2.43204	1.72084	3.54234	1.91752	1.99321	1.68988
MSTRG.380	chr1:16010967-16061264	+	50298	18.9631	21.696	21.6441	16.9575	19.2023	16.9724
MSTRG.385	chr1:16114938-16127037	-	12100	3.24227	4.23057	4.52012	0.930865	1.03252	1.00329
MSTRG.388	chr1:16133664-16174642	-	40979	1.49464	1.41634	1.5739	0.644363	0.649842	0.937164
MSTRG.390	chr1:16162522-16163021	+	500	0	0.087046	0.111269	0.193126	0.233109	1.17685
MSTRG.391	chr1:16174359-16266955	+	92597	14.5298	14.023	13.0868	21.5599	16.0287	26.2523
MSTRG.394	chr1:16361066-16361554	-	489	0.801588	0.414956	1.0706	1.33077	2.10293	0.971206
MSTRG.401	chr1:16451623-16456061	+	4439	0	0.391618	0.662174	0.537055	1.36555	0.923573
MSTRG.402	chr1:16458893-16459837	+	945	0	1.75035	0.508598	0	0.448763	0.632803
MSTRG.405	chr1:16488403-16492002	+	3600	1.32483	1.09033	1.02109	0.155838	0.224902	0.562638
MSTRG.399	chr1:16512963-16513688	+	726	0.765943	1.03334	1.12481	0	0.12967	0.051807
MSTRG.409	chr1:16524434-16533477	-	9044	5.42376	5.27122	5.41077	2.73834	2.52677	2.42865
MSTRG.407	chr1:16557098-16557743	-	646	1.23366	0.717148	0.587908	1.24043	1.14561	0.865358
MSTRG.412	chr1:16693712-16721756	-	28045	0.79699	2.28751	1.02614	1.51667	2.61478	1.29411
MSTRG.421	chr1:16767231-16785451	+	18221	8.3126	6.20456	10.5462	12.2384	9.06507	11.9281
MSTRG.419	chr1:16791997-16792876	-	880	0.412726	1.28217	0.503773	0.393312	0.125361	0.572985
MSTRG.417	chr1:16885075-16885400	+	326	1.57237	1.61987	0.438757	0.27484	0.181754	0.839825
MSTRG.422	chr1:16888821-16939982	-	51162	8.368	9.06562	9.02794	8.32408	8.43085	8.8667
MSTRG.424	chr1:16944748-16971200	-	26453	2.8815	2.4968	2.84823	3.44948	3.44547	4.30846
MSTRG.423	chr1:17011046-17012550	-	1505	43.4936	38.2462	37.9951	41.3865	41.3102	40.6392
MSTRG.438	chr1:17221055-17222125	-	1071	3.54258	2.00511	3.41227	0.890989	0.979345	1.2574
MSTRG.448	chr1:17316670-17338423	-	21754	2.21484	1.56974	2.04343	3.04771	2.86565	2.94121
MSTRG.442	chr1:17359587-17380532	+	20946	0	0	0.192279	1.34613	1.14867	0
MSTRG.445	chr1:17749226-17766174	+	16949	2.7106	1.8672	1.92894	1.03141	1.8034	1.17719
MSTRG.449	chr1:17866218-18024369	+	158152	3.2551	3.21802	3.15855	1.93673	1.78952	2.12276
MSTRG.464	chr1:19401008-19536770	-	135763	9.55058	9.59052	9.26158	8.96863	7.39521	8.40106
MSTRG.466	chr1:19536995-19558116	+	21122	1.10801	1.24178	1.09614	0.204619	0.152733	0.194184
MSTRG.468	chr1:19578033-19591339	+	13307	7.45167	13.5032	7.66662	6.85248	7.73691	10.2501
MSTRG.453	chr1:19619267-19638597	-	19331	3.3516	3.04089	3.04906	2.5142	2.11318	2.41208
MSTRG.459	chr1:19705136-19812016	+	106881	0.430471	1.13573	0	0.319392	1.54735	0.243718
MSTRG.462	chr1:19923485-19935062	+	11578	7.02695	6.92356	6.97715	9.23491	10.5559	10.1422
MSTRG.463	chr1:19983984-19984497	-	514	0.241856	1.09664	0.277937	0.643672	1.09854	0.237353
MSTRG.470	chr1:20008737-20126438	-	117702	3.64593	3.12348	3.14541	1.489	1.372	1.46365
MSTRG.472	chr1:20204993-20205212	+	220	0	0	0	0.430289	1.05782	0.748069
MSTRG.474	chr1:20217936-20239435	+	21500	3.77019	4.1988	3.92358	5.03009	4.10044	8.84127
MSTRG.475	chr1:20808884-20813291	-	4408	11.7745	11.2234	6.32418	9.6334	9.63858	6.92417
MSTRG.471	chr1:20915579-20945396	+	29818	69.3123	76.2948	74.3004	95.405	97.3653	91.0305
MSTRG.477	chr1:20979127-20987862	-	8736	15.9813	17.5303	17.291	19.0129	19.2571	15.6518
MSTRG.478	chr1:21046228-21058084	-	11857	2.06537	1.9851	1.91517	1.10511	1.04021	1.35304
MSTRG.479	chr1:21069175-21113816	-	44642	33.2878	32.7173	32.6753	7.93909	6.11513	13.8668
MSTRG.481	chr1:21132963-21503312	-	370350	20.6084	19.0633	17.748	20.5682	16.718	19.8611
MSTRG.483	chr1:21181511-21188756	+	7246	0.139008	1.45776	0.717465	0.276776	0.691983	0.749281
MSTRG.488	chr1:21502679-21503339	+	661	0.179216	0.260943	0.341583	0.426561	1.00005	1.74521
MSTRG.490	chr1:21543742-21671997	-	128256	12.8001	13.1609	12.6836	17.4782	16.7568	14.7369
MSTRG.491	chr1:21546299-21546544	+	246	0.164291	0.635349	0.489411	1.50128	0.49123	0.785391
MSTRG.492	chr1:21548251-21551864	+	3614	1.16798	0.256045	0.370506	0.319659	0.740084	0.230583
MSTRG.489	chr1:21749530-21752877	-	3348	1.11546	1.06255	1.19572	1.74074	1.84985	2.00991
MSTRG.495	chr1:21766731-21792311	+	25581	1.02091	0.679176	0.780785	1.07244	1.27727	1.28526
MSTRG.497	chr1:21922708-21978396	-	55689	4.19705	3.84408	3.57872	5.41978	6.08134	4.99404
MSTRG.498	chr1:21926071-21932630	+	6560	0	1.19573	0.299295	0	0	0.27354
MSTRG.499	chr1:22005396-22110099	-	104704	10.5867	9.9846	8.48563	10.2376	9.47424	10.4861
MSTRG.506	chr1:22243254-22246385	-	3132	0.932838	0.957666	0.737538	0.717371	0.485277	1.62577
MSTRG.507	chr1:22246887-22249661	-	2775	0.731459	0.789138	0.608853	0.372505	0.485127	1.27798
MSTRG.508	chr1:22250855-22252486	-	1632	0.368039	0.518909	0.491666	0.387118	0.311948	1.33225
MSTRG.502	chr1:22352004-22357708	+	5705	1.01622	1.56079	1.60003	0.661965	1.12237	0.657435
MSTRG.509	chr1:22379182-22419416	+	40235	75.7366	79.2415	90.501	106.888	117.305	102.389
MSTRG.512	chr1:22755380-22857642	+	102263	7.11499	7.51638	7.35931	5.83041	5.53566	6.8068
MSTRG.513	chr1:22769226-22774928	+	5703	0.520399	0.260695	0.347405	0.470321	0.315208	1.57334
MSTRG.523	chr1:23345941-23410181	+	64241	30.0513	28.3863	24.0614	64.7118	65.9278	56.1125
MSTRG.524	chr1:23345974-23376954	-	30981	0.311414	0.798604	0.396915	0.992283	1.45024	0.748859
MSTRG.525	chr1:23346640-23514479	-	167840	6.97783	7.11611	7.22566	10.6601	10.5901	11.3461
MSTRG.520	chr1:23518388-23544033	-	25646	4.62448	4.09883	4.38602	3.3397	3.06156	3.15696
MSTRG.522	chr1:23607802-23619998	-	12197	3.9446	3.13948	3.64918	0.651606	0.234197	0.990014
MSTRG.521	chr1:23620835-23621433	-	599	0.643692	1.42283	1.31759	0.128173	0.096966	0.306305
MSTRG.532	chr1:23630456-23670755	-	40300	35.0948	32.5362	31.6101	35.7264	45.0637	54.3645
MSTRG.533	chr1:23636663-23650079	+	13417	0.599901	0.741813	1.17708	1.03039	1.24781	0.940746
MSTRG.531	chr1:23682803-23684466	-	1664	1.21473	0.823146	1.15933	0.836594	0.89278	1.95501
MSTRG.534	chr1:23685941-23751233	-	65293	9.00313	7.86789	8.10658	5.3355	5.17645	5.53669
MSTRG.536	chr1:23713804-23724087	+	10284	0.526976	0.616036	1.73379	0.948793	0.991918	0.180586
MSTRG.537	chr1:23724389-23744487	+	20099	1.59039	1.18235	0.834378	0.591847	0.950448	0.328752
MSTRG.539	chr1:23842851-23857712	-	14862	6.21854	6.1312	5.26031	5.64088	5.581	6.65326
MSTRG.542	chr1:24018269-24022908	+	4640	359.576	382.805	368.7	222.336	295.656	246.353
MSTRG.543	chr1:24018307-24022913	-	4607	5.14145	8.57444	8.40021	9.10768	11.9084	4.59886
MSTRG.545	chr1:24087024-24098887	-	11864	3.31003	2.65812	3.43517	1.15276	0.859926	1.40221
MSTRG.547	chr1:24104917-24106425	-	1509	0	1.45858	0	0	1.30843	1.989
MSTRG.553	chr1:24124186-24127263	-	3078	6.69291	5.93568	5.62219	5.28273	6.37246	4.96642
MSTRG.549	chr1:24171567-24194784	-	23218	8.16732	4.96284	6.13836	7.95182	8.0761	8.16708
MSTRG.556	chr1:24293797-24306821	-	13025	12.6527	11.4879	10.948	13.8257	15.0081	18.9507
MSTRG.554	chr1:24442113-24443684	-	1572	0.396089	0.280063	0.541469	1.04637	1.37712	0.942346
MSTRG.557	chr1:24562862-24566596	+	3735	0.336312	0.160752	0.393873	1.72765	0.951575	1.56871
MSTRG.566	chr1:24683490-24741765	-	58276	1.30663	1.4485	1.34938	1.02231	1.1091	1.01875
MSTRG.559	chr1:24801523-24802569	+	1047	1.14735	1.37123	1.94746	0.567734	0.835664	1.64099
MSTRG.560	chr1:24802836-24803225	+	390	1.368	0.617505	1.04717	0.317412	0.14693	0.440591
MSTRG.574	chr1:24969796-24995999	+	26204	15.9789	15.2651	16.0193	11.048	9.78552	15.5138
MSTRG.576	chr1:24995645-24998756	-	3112	0.909162	0.545764	0.76773	0.696589	1.16755	1.47862
MSTRG.569	chr1:25071870-25140620	-	68751	0.59729	0.937645	0.938695	0.026182	1.32517	0.693248
MSTRG.571	chr1:25226009-25291612	-	65604	16.7946	17.4966	18.1417	21.2832	21.2711	19.7469
MSTRG.572	chr1:25256529-25256756	+	228	0.223159	0.220584	0.42952	1.25043	0.36246	0.942052
MSTRG.578	chr1:25553939-25558981	+	5043	0.826458	1.25134	0.413722	0.352578	1.61242	0.891498
MSTRG.582	chr1:25568740-25664728	-	95989	3.40604	2.71768	3.00388	2.552	2.8872	3.78948
MSTRG.584	chr1:25577490-25577973	-	484	1.1601	0.179847	0.261804	0.51284	0.009262	0.701364
MSTRG.592	chr1:25714502-25715316	+	815	1.01769	0.679397	0.837138	0.732357	1.00945	1.21921
MSTRG.597	chr1:26146494-26159425	+	12932	5.34336	5.47551	5.69443	4.38626	3.87617	3.98061
MSTRG.599	chr1:26151730-26157899	-	6170	1.09632	1.21435	1.35203	1.09178	0.669929	1.89196
MSTRG.596	chr1:26187701-26202523	-	14823	4.68053	5.42149	5.8545	4.79124	5.33748	3.58922
MSTRG.604	chr1:26227056-26232900	+	5845	1.71974	1.62808	1.485	1.71339	2.35335	1.66999
MSTRG.601	chr1:26227086-26232908	-	5823	56.5192	34.5579	36.9517	48.923	40.6575	31.6684
MSTRG.605	chr1:26308895-26324546	-	15652	2.60469	2.18258	2.30999	2.99044	2.78446	3.27805
MSTRG.614	chr1:26606577-26607444	-	868	0.321477	0.209818	0.266398	1.51494	0.812644	0.781104
MSTRG.615	chr1:26608775-26633480	-	24706	7.48057	8.19512	6.42838	3.34848	2.69438	4.15469
MSTRG.621	chr1:26798946-26802284	-	3339	5.41703	5.16704	4.96159	3.06828	4.24195	2.9125
MSTRG.627	chr1:27022866-27023207	-	342	1.14428	0.403839	0.689696	0.174963	0.582443	0.389103
MSTRG.628	chr1:27049366-27049571	+	206	0	0	1.25067	0	0	0
MSTRG.624	chr1:27114424-27124884	+	10461	3.23428	3.7149	2.65887	1.57987	2.07415	2.86728
MSTRG.632	chr1:27153240-27182183	+	28944	2.28343	2.38229	7.44408	8.27825	9.15037	8.30677
MSTRG.631	chr1:27189652-27190548	-	897	0.973137	1.17355	0.679316	0.830855	1.07862	0.969299
MSTRG.635	chr1:27202625-27216788	-	14164	4.64647	3.57742	3.96003	3.22214	4.27884	5.21946
MSTRG.640	chr1:27248234-27272642	-	24409	2.27603	2.86899	1.61374	2.04158	2.59143	1.56113
MSTRG.633	chr1:27320198-27327389	+	7192	13.3815	7.59438	17.2414	17.6198	14.5882	15.488
MSTRG.641	chr1:27425306-27481972	-	56667	2.58445	2.61753	2.77321	4.27606	5.60874	5.64869
MSTRG.642	chr1:27614200-27634735	+	20536	6.70134	6.7503	5.32772	5.41139	4.036	6.48114
MSTRG.644	chr1:27648772-27656211	+	7440	3.03833	2.82077	3.12935	2.35942	2.51638	3.49169
MSTRG.647	chr1:27721727-27724044	-	2318	0.568834	0.773408	0.876152	0.702244	0.610621	1.60802
MSTRG.648	chr1:27725146-27725349	-	204	0.1592	0.887527	1.74299	0.544739	1.10448	0.591486
MSTRG.653	chr1:27860814-27930942	-	70129	2.89368	3.02121	2.88485	6.47584	6.74961	6.59557
MSTRG.666	chr1:28157325-28178187	+	20863	15.3974	15.3536	14.9725	8.91838	8.99448	9.69217
MSTRG.665	chr1:28187938-28188254	+	317	0	0	0.055917	0.256676	0.060255	1.15517
MSTRG.669	chr1:28218037-28241244	-	23208	33.736	29.2553	19.9131	25.5194	24.3035	19.7333
MSTRG.677	chr1:28525967-28559515	-	33549	33.7316	30.7513	31.1757	35.9796	38.3782	35.0519
MSTRG.679	chr1:28527643-28537130	+	9488	1.1957	1.02679	0.426926	1.06236	0.89476	1.15136
MSTRG.680	chr1:28561973-28564611	+	2639	26.7929	26.2365	24.4471	20.9716	21.7835	21.915
MSTRG.681	chr1:28562639-28564603	-	1965	0.785646	1.29811	0.703799	0.5929	1.36713	0.427729
MSTRG.682	chr1:28566020-28573600	-	7581	1.33174	1.46061	1.58084	1.26611	0.830438	2.94793
MSTRG.683	chr1:28586038-28609002	+	22965	16.2913	14.8145	15.5726	5.12053	4.95388	5.7316
MSTRG.684	chr1:28672571-28672836	-	266	0.101744	0.526493	0.816154	1.0962	0.285767	0.83403
MSTRG.686	chr1:28764682-28826876	+	62195	9.22992	8.59814	9.20876	10.0983	10.5208	9.19562
MSTRG.690	chr1:28832492-28865868	+	33377	15.2198	16.3626	17.5787	12.9857	14.0163	13.5787
MSTRG.693	chr1:28844772-28858803	-	14032	0.433844	0.419403	0	0.355456	1.18982	0.691227
MSTRG.699	chr1:28866776-28923123	+	56348	8.55608	8.62304	8.48012	3.9099	4.32443	4.44654
MSTRG.700	chr1:28870972-28873054	+	2083	1.28577	1.19051	1.26079	1.9566	2.25627	2.48814
MSTRG.701	chr1:28879609-28904276	+	24668	6.28462	6.25621	6.04915	3.51614	3.45386	4.56948
MSTRG.702	chr1:28905058-28908369	-	3312	5.07564	5.35831	5.79715	2.58113	2.40366	2.82331
MSTRG.706	chr1:29213633-29446550	+	232918	9.15709	9.54259	8.57353	9.56282	9.8047	9.61509
MSTRG.711	chr1:29474365-29508394	-	34030	14.7027	14.3506	13.2689	10.234	11.3788	10.3901
MSTRG.712	chr1:29474825-29481360	+	6536	5.99805	6.2018	4.38742	3.90483	4.11934	3.59469
MSTRG.715	chr1:29523692-29531722	+	8031	1.44263	1.6308	1.47111	1.17963	0.983372	1.10954
MSTRG.716	chr1:29543948-29546679	+	2732	0.943409	0.879149	1.10903	0.277257	0.220591	0.605194
MSTRG.718	chr1:29579128-29630552	+	51425	6.24176	5.84266	5.63842	5.0924	5.05171	5.25362
MSTRG.720	chr1:29614695-29615343	-	649	0.923261	1.08699	0.871836	0.135128	0	0.366548
MSTRG.723	chr1:31342315-31360579	-	18265	3.03049	3.2537	3.3653	5.73383	4.64364	4.98186
MSTRG.734	chr1:31769842-31849873	+	80032	27.6733	24.226	24.2276	41.3188	41.5407	38.5657
MSTRG.736	chr1:31832215-31849204	-	16990	15.6942	18.0213	13.7462	11.0279	11.6367	13.9499
MSTRG.730	chr1:31886041-31907525	+	21485	9.62226	9.63415	10.2106	19.0441	18.2257	19.6346
MSTRG.737	chr1:32042169-32053283	+	11115	7.36942	7.48468	8.70246	6.94126	7.24652	5.75935
MSTRG.739	chr1:32044802-32049131	-	4330	0.626786	1.16229	0.254861	0.403321	0.844034	0
MSTRG.740	chr1:32051422-32052906	-	1485	0.553012	0.934201	0.679187	1.0775	0.785796	0.853951
MSTRG.744	chr1:32118189-32136038	-	17850	3.37859	2.6127	2.78372	2.30072	2.04984	3.01415
MSTRG.745	chr1:32193012-32222416	-	29405	2.34061	2.36219	1.92143	5.59823	5.00216	5.90864
MSTRG.748	chr1:32256029-32279730	-	23702	1.30224	1.17303	1.77825	1.98458	1.2263	2.01909
MSTRG.751	chr1:32369225-32408177	-	38953	57.4593	56.2851	57.2909	44.7703	48.3889	42.3804
MSTRG.753	chr1:32385143-32403954	+	18812	3.24656	3.44307	3.63153	4.85042	8.10115	5.27799
MSTRG.756	chr1:32479610-32479894	-	285	0.640673	1.27939	0.325142	0.233284	1.11884	0.501088
MSTRG.758	chr1:32539047-32557610	+	18564	4.75083	5.10297	4.45111	3.4454	3.70846	3.39883
MSTRG.765	chr1:32573639-32697205	+	123567	18.4203	20.1435	21.1848	20.6056	20.8945	22.3335
MSTRG.767	chr1:32645352-32647172	-	1821	1.13892	0.825139	1.04136	0.8966	1.41019	0.888801
MSTRG.769	chr1:32666101-32667815	-	1715	0.604358	0.375537	0.332838	0.985357	1.27642	0.698434
MSTRG.768	chr1:32666234-32670988	+	4755	1.42772	1.32091	1.47356	4.81673	5.38314	5.94654
MSTRG.773	chr1:32681801-32686797	-	4997	0.745021	0.691995	1.15416	0.310656	0.509232	0.594048
MSTRG.775	chr1:32705992-32714457	+	8466	1.84356	1.75189	1.85651	2.36585	1.20019	3.22393
MSTRG.776	chr1:32710927-32714457	+	3531	0.136932	0.318577	0.109158	1.08255	3.37134	2.06268
MSTRG.762	chr1:32796453-32798770	-	2318	0.783669	1.56217	0.838753	1.53918	1.63668	1.75491
MSTRG.764	chr1:32800219-32801821	+	1603	0.658054	1.22475	1.10423	0.891646	1.4251	1.2729
MSTRG.779	chr1:32826872-32860049	-	33178	9.80318	10.0825	10.1655	8.1922	8.41194	9.3855
MSTRG.777	chr1:32901602-32901830	+	229	1.15294	1.75364	2.32835	2.79063	1.89351	5.51236
MSTRG.782	chr1:32930658-33071542	+	140885	1.48314	0.602905	1.34365	1.20172	0.663844	0.922413
MSTRG.783	chr1:33086435-33116136	-	29702	8.51554	7.70175	8.21635	9.45826	10.1734	10.223
MSTRG.786	chr1:33116814-33123075	-	6262	0	0.684609	0.996237	1.56438	0	0.439871
MSTRG.785	chr1:33116827-33133882	+	17056	28.9703	30.0127	30.3174	25.0556	25.6878	24.1798
MSTRG.781	chr1:33207606-33233558	-	25953	1.17328	1.06389	0.245014	0.739031	0.589103	0.231681
MSTRG.791	chr1:33265480-33324475	+	58996	5.07997	4.85896	5.74476	4.56054	3.9327	5.41415
MSTRG.792	chr1:33398925-33431384	-	32460	14.5912	18.7909	18.4999	10.914	15.2837	12.2744
MSTRG.800	chr1:33473585-33546597	-	73013	45.3817	51.2469	37.6911	28.5568	25.1208	21.6888
MSTRG.801	chr1:33475665-33480184	+	4520	0.436499	0.673072	0.644307	0.486142	1.1465	0.330957
MSTRG.802	chr1:33516058-33516461	+	404	0.017417	0.401235	0.211125	0.598719	0.586652	1.25376
MSTRG.793	chr1:33721247-33721684	+	438	0	0.130282	0.120208	0.630309	0.371125	1.31379
MSTRG.797	chr1:33726093-33726420	+	328	0.826222	0.350307	0.100593	1.08011	0.670292	1.11876
MSTRG.811	chr1:33830821-33831482	+	662	0.462786	0.685205	1.18822	0.35773	0.348302	0.364253
MSTRG.805	chr1:33964323-33967311	+	2989	1.13622	1.01876	1.01156	1.08204	0.952302	1.35454
MSTRG.813	chr1:35220648-35224113	+	3466	9.36993	8.56412	8.73072	12.7949	13.1113	12.314
MSTRG.819	chr1:35315632-35317127	-	1496	1.41019	1.06415	1.45236	0.738593	0.466648	1.12665
MSTRG.821	chr1:35452581-35497327	-	44747	2.63283	2.20611	2.44567	2.09748	2.0551	2.26269
MSTRG.822	chr1:35544992-35580237	+	35246	6.14191	5.40067	6.00294	6.00932	5.24243	7.30147
MSTRG.823	chr1:35548490-35584386	+	35897	0.834895	1.07597	0.713999	1.26207	0.833965	1.38277
MSTRG.824	chr1:35574683-35582462	+	7780	0.903696	1.05208	0.9432	1.27243	1.08601	2.11299
MSTRG.825	chr1:35621192-35658749	-	37558	43.3619	39.5917	42.3413	52.8563	58.7	50.5179
MSTRG.826	chr1:35649777-35658738	+	8962	0.781344	1.16433	1.19186	1.66723	2.17191	1.67681
MSTRG.827	chr1:35734289-35887545	+	153257	15.8869	13.8565	13.9681	11.2043	8.75583	10.5604
MSTRG.835	chr1:35990302-35997505	-	7204	1.69619	1.40029	1.48008	1.10601	0.533371	2.22365
MSTRG.836	chr1:36000965-36001651	-	687	0.417056	0.08447	0.206414	0.372823	0	1.15915
MSTRG.832	chr1:36067185-36108226	-	41042	26.5916	35.7105	26.1881	43.6602	47.9763	32.6329
MSTRG.838	chr1:36109374-36235529	-	126156	16.6576	15.4148	13.2295	14.3594	11.9696	14.253
MSTRG.842	chr1:36215319-36216986	+	1668	1.06922	0.613947	1.10948	0.559557	0	0
MSTRG.843	chr1:36273235-36323491	+	50257	4.09194	3.71333	4.51078	1.70752	1.22874	2.22823
MSTRG.848	chr1:36396333-36538101	+	141769	1.65427	3.51552	2.22041	2.44516	2.53855	2.57688
MSTRG.844	chr1:36554476-36559533	+	5058	7.84898	6.46419	6.50922	6.79855	7.72597	6.13641
MSTRG.853	chr1:36602718-36603445	+	728	0	0	0	0	1.0655	0.140759
MSTRG.855	chr1:36621802-36645939	-	24138	1.23538	1.59257	1.16177	1.52367	2.25338	1.79554
MSTRG.854	chr1:36621803-36645916	+	24114	18.0712	17.2045	17.0926	25.7962	29.2157	23.7818
MSTRG.850	chr1:36690033-36770954	+	80922	26.2055	33.8201	30.8211	26.6388	24.6441	26.4363
MSTRG.856	chr1:36771988-36794854	+	22867	2.95944	3.10918	2.90308	1.94018	2.20587	2.49245
MSTRG.860	chr1:36921373-36930023	-	8651	22.2383	21.9204	20.4939	21.5294	21.7675	20.4959
MSTRG.861	chr1:36929408-36929969	+	562	0.500059	0	0	0	0.82051	1.16127
MSTRG.862	chr1:37920480-37942906	-	22427	1.98255	2.04048	1.699	2.22112	2.25127	2.08056
MSTRG.863	chr1:37940167-37949961	+	9795	7.08789	6.28441	5.76605	8.23704	9.1076	10.1681
MSTRG.866	chr1:38002291-38019891	-	17601	6.28321	6.24428	6.24362	8.97471	8.57245	7.30658
MSTRG.870	chr1:38147242-38157877	-	10636	5.87973	5.14767	4.94449	4.95801	5.42417	2.67692
MSTRG.872	chr1:38260155-38271473	+	11319	2.66394	2.29755	2.38413	1.4387	1.32646	1.21171
MSTRG.879	chr1:38326369-38364276	-	37908	3.09738	3.25989	3.00973	2.45613	2.48529	2.65436
MSTRG.884	chr1:38435059-38455645	-	20587	38.0891	35.0405	35.5667	32.401	32.6268	32.4327
MSTRG.885	chr1:38456792-38458550	-	1759	0.853392	0.891078	1.31852	0.753163	0.451624	1.35914
MSTRG.887	chr1:38459854-38462279	-	2426	1.59156	1.40906	1.58864	0.919198	0.479636	1.09619
MSTRG.888	chr1:38463017-38471174	-	8158	11.8472	12.1672	12.9016	14.3479	14.5367	11.5115
MSTRG.892	chr1:39305021-39339777	-	34757	8.42345	7.4853	9.09118	11.4938	11.2606	10.3733
MSTRG.893	chr1:39324813-39331063	+	6251	1.43289	1.23166	1.39554	0.366464	0.21521	0.545272
MSTRG.889	chr1:39456575-39471731	+	15157	16.9465	24.1806	10.274	45.6851	44.2991	44.5995
MSTRG.891	chr1:39492026-39500287	-	8262	0.925844	0.891312	0.670659	1.65711	1.93227	0.92521
MSTRG.901	chr1:39571083-39952659	+	381577	6.67936	6.32806	6.53502	7.13325	5.577	7.00148
MSTRG.900	chr1:40042089-40042404	+	316	0.582961	1.07797	1.47511	1.02995	1.15958	1.08753
MSTRG.907	chr1:40204558-40219116	+	14559	5.82051	5.67668	5.73351	5.7037	5.94295	5.62632
MSTRG.928	chr1:40533376-40536185	-	2810	0.731459	0.662053	0.619067	1.64718	3.30593	1.2675
MSTRG.929	chr1:40538610-40562917	-	24308	12.0876	10.5286	11.4535	17.2536	18.6004	18.3628
MSTRG.926	chr1:40915779-40929386	+	13608	6.93253	6.0618	5.70319	6.18002	5.69991	7.19589
MSTRG.937	chr1:41151085-41157738	-	6654	2.26683	1.81813	1.88653	0.449929	0.32248	1.16492
MSTRG.942	chr1:41468810-41474373	-	5564	0	0	1.18524	0.219349	0	0
MSTRG.950	chr1:41487879-41491308	+	3430	0.663528	1.08995	0.799792	0.183268	0.050744	0.405335
MSTRG.951	chr1:41492874-41707826	-	214953	5.11373	5.04367	5.12525	2.02708	1.60263	1.62638
MSTRG.952	chr1:41510143-41513032	+	2890	0.998714	1.48323	0.981237	0.388575	0.262282	0.581866
MSTRG.953	chr1:41515889-41516864	+	976	0.836137	1.1509	1.14454	0.308815	0.085871	0.701484
MSTRG.954	chr1:41523278-41523555	+	278	0.114876	1.12304	1.31501	0.102497	0	0.809017
MSTRG.963	chr1:43148074-43167998	-	19925	5.37995	7.59011	5.56654	8.41883	9.73779	6.96964
MSTRG.965	chr1:43220651-43232660	-	12010	5.12406	4.57664	4.03652	9.53254	10.0607	9.75112
MSTRG.966	chr1:43232940-43255467	+	22528	0.971132	0.96652	0.800423	0.785367	0.907413	1.01502
MSTRG.973	chr1:43396439-43424541	+	28103	1.47353	1.22552	0.816251	1.49411	1.56353	0.898592
MSTRG.978	chr1:43630079-43636474	+	6396	0.440863	1.162	0.845902	0.866246	1.53162	0.262436
MSTRG.983	chr1:43824668-43825057	-	390	0.218081	0	0	0.594658	1.20843	0.240729
MSTRG.984	chr1:43825186-43825650	-	465	0.10499	0	0	0.281119	1.12744	0.058429
MSTRG.985	chr1:43826867-43828809	-	1943	0.275708	0	0	0.318824	0.907196	1.14393
MSTRG.987	chr1:43850397-43855455	-	5059	17.4185	16.6139	17.4457	17.1794	19.1574	17.4469
MSTRG.989	chr1:43909289-43916579	+	7291	1.27133	1.24884	1.21989	0.80173	0.745092	1.10603
MSTRG.992	chr1:43994233-44089337	+	95105	21.3817	19.7469	19.3264	17.3459	15.7548	18.2005
MSTRG.993	chr1:44063467-44064411	-	945	1.33347	0.406283	0.334651	0	0.947292	0
MSTRG.994	chr1:44088382-44088819	-	438	0.413169	1.08598	1.02818	0.663921	0.936268	0.630742
MSTRG.999	chr1:44173539-44174643	+	1105	1.54677	1.34144	0.898321	0.428055	0.214857	0.873406
MSTRG.1007	chr1:44444909-44456840	+	11932	10.4789	10.5382	10.2376	8.2745	8.9434	7.93041
MSTRG.1010	chr1:44458234-44458876	-	643	0.917566	1.13414	1.99713	0.274256	0.438921	1.50392
MSTRG.1009	chr1:44474187-44497101	-	22915	8.66624	9.67534	9.99429	7.15081	6.95128	7.59864
MSTRG.1013	chr1:44554332-44555105	+	774	1.37162	0.886704	0.522881	0.216589	0	0.453133
MSTRG.1014	chr1:44557939-44558999	+	1061	1.30193	0.658701	0.914071	0.04476	0.054008	0.375547
MSTRG.1017	chr1:44684377-44684901	-	525	0.562129	1.06089	1.51557	0	0	0.718717
MSTRG.1018	chr1:44686742-44821189	-	134448	8.94463	7.39917	7.43011	6.16426	6.16518	8.73491
MSTRG.1023	chr1:45097404-45117395	+	19992	6.39839	6.23532	6.14855	5.84243	6.55519	5.68443
MSTRG.1025	chr1:45097642-45097871	-	230	1.30692	2.34814	4.26625	1.2375	2.7626	1.05118
MSTRG.1022	chr1:45203734-45204926	+	1193	3.65783	3.43271	3.20339	0.67805	1.1171	1.87597
MSTRG.1030	chr1:45224796-45244410	-	19615	3.94083	5.67509	5.6542	3.9261	4.76084	2.72342
MSTRG.1036	chr1:45315633-45452282	-	136650	7.97362	6.41511	6.52646	5.82624	6.73172	5.96129
MSTRG.1041	chr1:45781945-45788183	+	6239	0.008618	0.018541	0	1.86712	1.13205	4.2341
MSTRG.1050	chr1:45965725-45988550	+	22826	2.06973	2.14735	2.26363	1.35204	1.42999	1.49448
MSTRG.1051	chr1:45976723-45988719	-	11997	192.914	215.585	320.908	419.11	504.181	630.333
MSTRG.1052	chr1:46016740-46035721	+	18982	15.6508	13.877	13.294	18.1344	19.5731	17.5781
MSTRG.1058	chr1:46044313-46046028	-	1716	1.26614	1.4254	0.834866	0.523424	0.27044	0.792396
MSTRG.1059	chr1:46046408-46050342	-	3935	1.95017	1.40075	1.69946	0.579576	0.529823	0.709058
MSTRG.1060	chr1:46049737-46083885	+	34149	35.4621	35.1837	28.186	19.2546	19.0656	19.853
MSTRG.1061	chr1:46080822-46084045	-	3224	1.25022	1.11614	1.09568	0.749142	1.39023	1.12935
MSTRG.1062	chr1:46092976-46152818	-	59843	11.9603	11.4679	14.3021	14.3754	13.4085	17.1504
MSTRG.1065	chr1:46153868-46159517	+	5650	22.4775	24.5082	23.3665	12.624	12.1984	12.8182
MSTRG.1067	chr1:46379260-46501796	+	122537	4.14984	3.72095	3.96098	4.84937	4.66841	4.59969
MSTRG.1073	chr1:46601430-46601735	+	306	1.50414	1.76304	1.48661	1.75113	3.11979	2.25488
MSTRG.1075	chr1:46654356-46664115	-	9760	9.7084	9.14758	9.00114	8.32012	9.34255	8.36138
MSTRG.1079	chr1:46745912-46755165	+	9254	1.31084	1.01591	1.30918	0.243797	0.203332	0.988325
MSTRG.1080	chr1:46755422-46756311	+	890	1.43915	1.15583	1.43419	0.458715	0.064385	1.17042
MSTRG.1081	chr1:46757912-46758571	+	660	1.74084	1.24971	1.20485	0.496007	0.220009	1.06917
MSTRG.1082	chr1:46759638-46765123	+	5486	1.42222	1.28032	1.3648	0.506266	0.333183	1.12173
MSTRG.1083	chr1:46767180-46767440	+	261	0	0	0.201055	0	1.1112	0.093632
MSTRG.1084	chr1:46768819-46782448	+	13630	112.707	102.216	124.866	105.028	115.052	97.3776
MSTRG.1085	chr1:46769337-46782448	-	13112	1.50672	1.76671	2.31972	2.21509	2.42055	1.53884
MSTRG.1088	chr1:46817590-46831592	+	14003	0.661749	1.13204	1.0271	0.378896	0.35863	0.460743
MSTRG.1086	chr1:46980202-46981830	+	1629	1.09286	0.89023	1.26806	0.929783	1.15329	1.19242
MSTRG.1093	chr1:47140855-47184736	-	43882	14.5607	14.255	15.0835	19.5076	19.252	18.9189
MSTRG.1101	chr1:47901261-47903274	-	2014	1.80398	0.963046	1.43426	0.685627	0.522496	1.08837
MSTRG.1106	chr1:48674729-48679346	-	4618	2.00994	0.7513	1.28655	0.287767	0.243777	0.124684
MSTRG.1112	chr1:50883222-50889172	-	5951	3.38337	3.00975	3.66778	2.63641	2.91817	2.89842
MSTRG.1115	chr1:51439736-51439949	-	214	0.077567	0	0.397752	1.14139	0.218588	0.036579
MSTRG.1116	chr1:51478458-51479114	+	657	1.20449	0.276757	0.119673	0	0	0
MSTRG.1129	chr1:51819957-51984926	-	164970	14.0819	13.8891	13.493	17.02	15.8704	16.427
MSTRG.1141	chr1:52163125-52344477	-	181353	22.4225	23.3472	22.9094	26.1152	22.984	25.5561
MSTRG.1146	chr1:52305934-52306149	+	216	0.522068	0.822545	0.832305	0.766583	0.62984	1.28696
MSTRG.1135	chr1:52497141-52521843	-	24703	16.4842	14.9872	15.8235	10.8199	13.0722	12.7911
MSTRG.1158	chr1:52813239-52815869	-	2631	1.23542	1.18671	0.870177	0.338441	0.133717	0.60223
MSTRG.1157	chr1:52820559-52831846	-	11288	3.4941	3.02365	2.58042	2.95366	3.04521	2.76692
MSTRG.1167	chr1:52838520-52860286	-	21767	17.3376	16.6281	16.8761	13.7159	14.1004	12.5757
MSTRG.1168	chr1:52870292-52886511	+	16220	14.1156	12.0709	15.7875	13.9563	13.5994	13.1545
MSTRG.1169	chr1:52896798-53018666	-	121869	5.87008	5.02911	4.88436	4.57544	3.70907	5.01658
MSTRG.1160	chr1:53148338-53148567	-	230	0.078446	0	0.206025	1.27741	0.311005	0.124515
MSTRG.1163	chr1:53212114-53215413	-	3300	2.10618	1.88089	1.82438	2.02787	1.98339	1.89424
MSTRG.1175	chr1:53308419-53369442	+	61024	1.60151	2.48273	2.55112	2.5305	2.02404	2.3677
MSTRG.1177	chr1:53361904-53392884	-	30981	1.0472	1.01625	0.981737	0.402918	0.2981	0.569378
MSTRG.1185	chr1:53458367-53458842	-	476	0.260785	0.196686	0.472678	1.05539	1.58772	1.11626
MSTRG.1192	chr1:53711421-53793686	-	82266	9.61137	7.98283	8.38852	10.7398	8.80705	12.2159
MSTRG.1187	chr1:54231136-54304136	-	73001	25.4661	24.1944	25.0803	30.691	33.3684	27.613
MSTRG.1197	chr1:54317406-54355453	-	38048	5.68044	5.11067	5.41676	11.4514	11.2591	9.54011
MSTRG.1198	chr1:54387235-54412016	-	24782	19.7533	19.4761	19.6828	15.5949	14.4506	14.8643
MSTRG.1199	chr1:54412031-54433406	+	21376	14.6532	16.967	17.9838	18.3557	18.2945	18.3689
MSTRG.1200	chr1:54497349-54519111	-	21763	13.9315	13.7973	14.2124	20.0978	22.0567	18.6776
MSTRG.1202	chr1:54518767-54519077	+	311	0.087022	0.063442	0.726277	1.40994	1.03596	0.3401
MSTRG.1212	chr1:54708931-54722818	+	13888	0.20595	0	0.510243	0.675671	2.34269	1.54415
MSTRG.1214	chr1:54871867-54872097	+	231	0.203859	0.202647	0	0.190508	1.29516	0.240513
MSTRG.1217	chr1:55181510-55207980	+	26471	2.24319	2.00162	2.04843	1.75381	1.70684	1.58758
MSTRG.1218	chr1:55505221-55540374	+	35154	4.23523	5.26597	4.04232	6.42395	6.65047	8.0046
MSTRG.1219	chr1:55517960-55518441	-	482	0.218878	0.527983	0.439476	0.180358	1.51133	0.413144
MSTRG.1220	chr1:55532035-55600089	-	68055	12.0834	11.7011	11.3286	12.9813	11.3086	12.8466
MSTRG.1250	chr1:58933599-59012412	-	78814	1.01664	1.21215	0.936477	1.95305	1.70839	1.97319
MSTRG.1232	chr1:59041097-59043148	-	2052	15.951	9.38864	7.79832	4.15633	4.58569	4.4934
MSTRG.1233	chr1:59041706-59238497	+	196792	4.28977	3.68357	3.31956	0.726492	0.430563	1.71252
MSTRG.1235	chr1:59120423-59165752	-	45330	2.5491	2.45245	2.46259	2.36632	1.49185	3.5353
MSTRG.1237	chr1:59226164-59238562	+	12399	1.62398	1.46296	0.41983	0.590455	0.248437	0.973492
MSTRG.1231	chr1:59247875-59248105	+	231	0.370226	1.55334	0.776467	1.54531	0.648004	1.13149
MSTRG.1263	chr1:61523266-61523578	-	313	0.579901	0.536428	1.47579	0.65596	1.42351	1.22849
MSTRG.1272	chr1:62330063-62629324	+	299262	3.35349	3.44251	2.70222	1.83226	1.59327	1.8998
MSTRG.1268	chr1:62702032-62702286	-	255	0.111086	0.215434	0.719906	0.628855	1.15798	0.646142
MSTRG.1283	chr1:62902326-62917473	+	15148	81.1122	76.0123	74.4653	68.1819	65.6616	62.7846
MSTRG.1279	chr1:63786555-63788107	-	1553	6.00593	6.34396	6.78964	7.7736	7.76178	6.11621
MSTRG.1296	chr1:63906471-63988872	-	82402	8.67215	8.26841	8.25168	5.40181	3.79313	5.64503
MSTRG.1297	chr1:63989061-64003086	+	14026	2.25528	1.84561	2.09239	1.58431	1.24178	1.64086
MSTRG.1300	chr1:64052526-64055144	-	2619	1.33174	1.15559	0.886427	0.248421	0.072411	0.24064
MSTRG.1301	chr1:64055437-64056258	-	822	0.742559	1.16085	0.760086	0.12768	0.057856	0.168625
MSTRG.1302	chr1:64058947-64123059	+	64113	12.4812	12.6354	11.29	12.7731	11.8444	10.346
MSTRG.1282	chr1:64818864-64819227	-	364	3.13863	1.98781	2.94252	6.86997	5.5364	7.92933
MSTRG.1305	chr1:65309779-65432187	-	122409	46.9638	44.6489	43.8663	39.9335	38.9064	36.4165
MSTRG.1314	chr1:65886393-65901690	+	15298	2.2252	2.48255	2.94623	0.892736	1.09129	0.72149
MSTRG.1313	chr1:66108926-66113380	-	4455	0.113399	0.078494	0.124341	2.68648	1.92155	5.44572
MSTRG.1318	chr1:66922000-67030046	-	108047	1.36545	1.00244	1.53139	0.705598	0.254065	1.01114
MSTRG.1325	chr1:67398335-67453713	+	55379	4.64114	5.65243	4.21139	11.9176	9.76075	6.35552
MSTRG.1326	chr1:67421021-67519782	-	98762	4.89186	4.92667	6.02757	4.01583	3.82517	4.24069
MSTRG.1327	chr1:67868042-67896082	-	28041	81.0406	75.4684	73.1097	53.3838	54.519	51.7361
MSTRG.1328	chr1:67878766-67880991	+	2226	0.789088	1.35345	0.576343	0.444609	0.674958	0.856795
MSTRG.1330	chr1:67885736-67896074	+	10339	1.95125	2.76082	1.64963	1.53811	1.96724	1.07953
MSTRG.1332	chr1:68150895-68151163	-	269	1.16372	1.71863	0.583922	0.154769	1.07018	0.624579
MSTRG.1333	chr1:68153607-68153847	-	241	0.744915	0.734412	1.73027	1.30187	1.40317	0.815184
MSTRG.1334	chr1:68167149-68298425	-	131277	77.2395	80.1362	82.7983	62.7186	17.7519	58.0149
MSTRG.1341	chr1:68564026-68698206	-	134181	9.44159	10.5073	12.4383	14.6483	14.2289	15.2925
MSTRG.1344	chr1:68851727-68949222	+	97496	0.0675756	0.0684181	0.0960073	10.8527	4.57477	9.85145
MSTRG.1346	chr1:68941257-68949109	-	7853	9.94759	12.8856	14.2667	9.73874	7.42827	8.87883
MSTRG.1357	chr1:70610488-70671261	-	60774	14.7883	12.789	14.0224	15.5341	14.6594	15.7257
MSTRG.1359	chr1:70687079-70717680	+	30602	27.392	20.8345	26.7236	16.99	17.9837	22.1926
MSTRG.1361	chr1:70703140-70716685	-	13546	2.19858	2.09436	2.7964	3.43204	3.49679	2.69256
MSTRG.1350	chr1:70820511-70833594	+	13084	4.98995	5.57123	4.76912	7.14622	8.18248	4.46011
MSTRG.1362	chr1:70877066-70905253	+	28188	17.992	20.4534	17.8999	13.7791	14.4317	14.0425
MSTRG.1364	chr1:71528980-71546694	-	17715	60.7293	55.3552	55.8108	36.199	29.2668	39.8818
MSTRG.1366	chr1:73456863-73457082	-	220	0.121378	0.521396	0.591923	0.715229	0.757482	2.39463
MSTRG.1380	chr1:75169746-75198706	-	28961	12.9675	12.3753	14.4987	19.3557	19.3031	16.9988
MSTRG.1381	chr1:75198931-75232362	+	33432	18.2469	18.7086	14.8208	17.0899	13.7005	17.1122
MSTRG.1386	chr1:76208651-76208924	-	274	2.04461	4.72893	2.59283	2.99384	2.35098	3.57457
MSTRG.1385	chr1:76251916-76257203	+	5288	16.7253	14.4682	14.606	11.8011	10.2964	10.7809
MSTRG.1383	chr1:77594799-77595353	+	555	14.9526	14.9725	12.9448	10.3464	1.35019	11.2366
MSTRG.1388	chr1:78028101-78149088	-	120988	7.98801	8.89754	7.89214	6.67323	4.34529	5.34632
MSTRG.1391	chr1:78177187-78225496	-	48310	14.966	13.1778	14.2907	13.7665	12.7008	14.957
MSTRG.1397	chr1:78354200-78408438	+	54239	11.0474	9.59501	9.46106	5.65495	4.4082	6.22281
MSTRG.1398	chr1:78409740-78445129	-	35390	40.512	38.7281	41.1465	39.0834	38.4341	39.9545
MSTRG.1399	chr1:78458111-78459860	+	1750	6.13594	5.24827	4.40427	11.1068	10.8479	11.6121
MSTRG.1408	chr1:79115543-79129762	+	14220	8.11102	7.49465	6.98017	11.1238	9.04029	10.2806
MSTRG.1406	chr1:79577157-79578675	-	1519	1.02281	0.797682	0.954348	1.10581	0.321039	0.567489
MSTRG.1405	chr1:80162068-80167432	-	5365	0	0	0	1.63838	1.49255	2.59879
MSTRG.1409	chr1:82533452-82533711	-	260	0.008823	0.006324	0.087549	0.324515	0.605063	1.2274
MSTRG.1410	chr1:82535082-82535495	-	414	0.388019	0.192267	0.210042	2.00315	0.702544	2.99694
MSTRG.1411	chr1:84524203-84524628	-	426	0	0	0	0.976742	1.44122	1.86082
MSTRG.1415	chr1:84944958-84948648	-	3691	0	0	0.461958	0	1.15751	0.52952
MSTRG.1424	chr1:85116054-85156438	-	40385	10.0015	8.27548	8.54163	9.44617	7.09917	8.78733
MSTRG.1423	chr1:85646366-85646588	-	223	0.606007	1.24042	0.222723	0.272404	0	0.095033
MSTRG.1429	chr1:85784169-85930823	-	146655	6.45984	9.60139	3.02361	13.2198	19.404	17.3497
MSTRG.1433	chr1:86046444-86049645	+	3202	39.8176	47.1971	49.2717	67.6783	83.2474	73.6999
MSTRG.1437	chr1:86814515-86862006	-	47492	8.93556	7.3178	5.64039	7.71209	4.93538	5.2356
MSTRG.1440	chr1:87380331-87575632	+	195302	4.06551	3.64518	4.15139	6.08155	5.34453	5.49602
MSTRG.1438	chr1:87796991-87811258	+	14268	7.06211	6.51107	12.6985	5.53159	6.69426	5.57228
MSTRG.1451	chr1:89390042-89458459	-	68418	10.2467	8.69567	8.89888	7.78679	7.08263	7.93563
MSTRG.1452	chr1:89472362-89488434	-	16073	7.35046	9.07106	7.33481	4.5957	4.16343	4.71849
MSTRG.1454	chr1:89568540-89592598	-	24059	0.865972	0.660265	0.57109	5.7222	5.89926	6.5556
MSTRG.1464	chr1:90286976-90287759	-	784	0.967031	0.670855	1.30597	0.570335	1.34969	1.03059
MSTRG.1465	chr1:90460693-90493785	+	33093	5.32166	4.76886	4.43218	6.1496	4.84064	6.65726
MSTRG.1466	chr1:91380861-91487612	-	106752	12.2943	10.4507	9.94796	14.2071	10.8744	13.6426
MSTRG.1470	chr1:91852780-91853143	-	364	158.415	421.204	326.818	364.425	322.648	304
MSTRG.1471	chr1:91852783-91853109	+	327	0.185484	0.863163	1.2304	1.12795	1.04	1.04725
MSTRG.1472	chr1:91966695-91991321	+	24627	21.7685	19.1703	18.6628	18.9017	16.6317	19.3251
MSTRG.1473	chr1:92487322-92491501	-	4180	1.23679	0.894569	1.14686	0.367877	0.155833	0.348137
MSTRG.1477	chr1:92539765-92540005	-	241	0.188662	1.65825	0.738423	0.859813	0.611411	0.363624
MSTRG.1480	chr1:92712049-92764544	-	52496	8.65723	7.34125	7.97238	8.90254	7.91299	8.62308
MSTRG.1489	chr1:92974253-93250681	-	276429	5.79612	4.40196	5.18034	6.66911	6.05988	6.76186
MSTRG.1482	chr1:93297582-93307419	+	9838	270.899	287.027	295.784	206.11	241.508	213.974
MSTRG.1483	chr1:93297607-93307481	-	9875	1.7962	2.95832	2.08345	1.5935	2.97658	2.08965
MSTRG.1502	chr1:93646273-93744590	+	98318	5.71294	4.37311	4.29633	3.10602	1.5681	3.14242
MSTRG.1507	chr1:93811492-93835048	+	23557	8.08956	7.28664	13.5656	12.091	12.8227	10.7624
MSTRG.1497	chr1:94023413-94023913	-	501	0.197353	0.408492	0.190216	0.098266	0	1.19279
MSTRG.1511	chr1:94158723-94165428	+	6706	2.6445	2.7249	3.03207	3.90812	3.20392	2.98963
MSTRG.1512	chr1:94168135-94175382	+	7248	0.849633	0.71001	0.825116	0.855341	0.745209	1.57003
MSTRG.1514	chr1:94249121-94249681	-	561	0.819478	1.09407	1.16407	0.443015	0.444709	0.472407
MSTRG.1517	chr1:94633025-94713326	-	80302	6.15029	9.33739	9.07358	12.7148	6.44236	11.7249
MSTRG.1523	chr1:94898208-94984222	+	86015	13.0632	12.1534	12.163	17.1002	15.3799	15.5913
MSTRG.1524	chr1:94994866-95007315	-	12450	36.723	30.1878	33.193	22.0389	20.1608	24.4949
MSTRG.1526	chr1:95098890-95099430	-	541	0.28448	1.31543	0.265039	0.153999	0.048997	0.236448
MSTRG.1529	chr1:95329754-95360609	+	30856	0.458841	0.669474	0.624666	2.94164	2.88079	2.38863
MSTRG.1531	chr1:95392396-95392672	+	277	0	0.310055	0.657661	1.43442	1.65636	0.927043
MSTRG.1532	chr1:95392958-95405459	+	12502	2.2311	1.4453	1.51661	1.04522	0.655062	0.822416
MSTRG.1535	chr1:95582894-95712779	+	129886	6.88367	6.68958	6.55156	5.65622	5.4039	5.4485
MSTRG.1534	chr1:97144430-97145176	-	747	10.0718	10.676	11.3102	8.25977	10.3305	6.41173
MSTRG.1540	chr1:97187348-97279003	+	91656	2.93303	2.75595	2.6805	1.54279	1.35331	1.89636
MSTRG.1542	chr1:98681141-98683019	+	1879	1.11866	0.870099	0.97979	0.075485	0.089207	0.105063
MSTRG.1552	chr1:99127279-99226056	+	98778	26.1615	25.2035	23.1156	24.3152	26.7135	23.7922
MSTRG.1554	chr1:99978202-99978496	+	295	0	0	0	0.609178	0.770316	2.06317
MSTRG.1556	chr1:100172404-100232187	-	59784	1.58404	1.54576	1.28149	6.7705	5.88483	5.69877
MSTRG.1570	chr1:100435569-100548050	+	112482	5.59445	6.5677	5.98963	6.19217	4.17728	5.00967
MSTRG.1573	chr1:100502193-100515474	-	13282	2.06167	2.1049	2.15432	0.88058	0.665684	0.891236
MSTRG.1576	chr1:100598721-100616053	+	17333	10.2862	8.46982	9.60292	4.81707	3.98554	6.10714
MSTRG.1558	chr1:100652504-100715376	-	62873	4.96949	4.6778	4.60833	3.47134	3.14035	3.12759
MSTRG.1578	chr1:101337943-101362365	-	24423	8.70978	8.34982	9.73445	14.5893	13.8908	14.5398
MSTRG.1588	chr1:101455914-101491309	-	35396	9.91687	8.37052	8.39054	5.61786	5.57286	4.82815
MSTRG.1583	chr1:101701311-101702118	+	808	0.066543	0	0.049523	1.1559	1.29488	1.10607
MSTRG.1587	chr1:102251818-102252845	-	1028	2.82074	3.22643	4.07282	2.27839	3.09778	2.43026
MSTRG.1597	chr1:104068379-104122152	+	53774	2.12435	2.00676	1.91752	1.4984	1.35347	2.52895
MSTRG.1592	chr1:106432775-106433138	-	364	0.520461	0.316192	0.592081	1.24944	0.380712	1.03539
MSTRG.1598	chr1:108113840-108228574	-	114735	0.142432	0.305124	0.184646	1.79157	1.59939	1.54964
MSTRG.1605	chr1:108839394-108847275	-	7882	0.983819	0.811155	0.830321	0.571905	0.208248	1.12509
MSTRG.1611	chr1:109192846-109203677	-	10832	16.7182	13.95	15.3705	18.8141	16.8114	20.2538
MSTRG.1612	chr1:109233251-109234792	-	1542	2.50971	1.49567	1.63393	0.831846	0.883151	0.673058
MSTRG.1613	chr1:109234963-109244425	+	9463	14.4254	29.0775	14.1114	15.3165	14.3817	17.4098
MSTRG.1614	chr1:109241355-109242827	-	1473	2.5746	2.18604	2.83501	3.16906	3.63394	3.59099
MSTRG.1617	chr1:109466728-109506079	-	39352	4.04406	3.62124	3.1386	2.72882	1.53256	1.6713
MSTRG.1620	chr1:109481016-109481258	+	243	0.43436	0.27065	0.015889	0.490535	1.06517	0.175209
MSTRG.1628	chr1:109534904-109535492	+	589	11.5942	13.4996	12.6028	9.8857	9.88029	8.91107
MSTRG.1622	chr1:109605925-109606510	-	586	16.312	16.1698	18.2559	42.4628	40.3642	39.3154
MSTRG.1632	chr1:109756540-109781262	+	24723	79.4962	73.9819	74.9638	39.7769	49.0501	40.2648
MSTRG.1633	chr1:109777852-109780739	-	2888	0.395254	1.3406	0.291401	0.487162	0.366202	0.144851
MSTRG.1634	chr1:109785763-109787810	+	2048	0.411899	0.268509	0.208577	0.377149	0.38768	1.10789
MSTRG.1640	chr1:109792240-109818373	+	26134	2.97965	3.01296	2.87462	4.97527	3.90587	3.90868
MSTRG.1643	chr1:109852192-109940552	-	88361	8.25134	7.70485	7.31212	14.1878	13.798	12.7307
MSTRG.1637	chr1:109944650-109953686	+	9037	0	0	1.43758	0.877635	0.940142	0.12806
MSTRG.1638	chr1:110026516-110035426	+	8911	0.821595	0.974744	1.24115	0.632284	0.758707	1.01993
MSTRG.1646	chr1:110091233-110186982	+	95750	6.49549	5.99514	6.23645	9.13682	9.41081	9.4211
MSTRG.1650	chr1:110230467-110236365	+	5899	3.8633	4.29718	4.19202	4.21074	4.25052	4.28526
MSTRG.1655	chr1:110292978-110306526	-	13549	3.16322	3.3806	2.59328	1.89318	2.0144	2.13911
MSTRG.1657	chr1:110623319-110624577	+	1259	0.153484	0.261499	0.0927	0.355505	0.276803	1.15858
MSTRG.1659	chr1:110752964-110753320	+	357	1.01736	1.59408	1.19165	3.0281	3.00169	3.80187
MSTRG.1666	chr1:110856957-110881793	-	24837	0.33572	0.390932	0.442437	1.297	1.36075	1.27937
MSTRG.1677	chr1:110902950-110911711	+	8762	2.29926	1.69643	2.23266	0.6676	0.305753	1.6026
MSTRG.1669	chr1:111486095-111487971	-	1877	0.944332	0.999536	0.803742	2.23982	1.57037	2.60202
MSTRG.1670	chr1:111489844-111506587	-	16744	19.0863	17.7365	17.0879	42.75	40.4728	42.7017
MSTRG.1672	chr1:111659957-111682736	-	22780	18.8674	15.9361	18.0247	11.8343	11.9313	10.7397
MSTRG.1673	chr1:111690299-111726953	+	36655	3.34612	4.8818	3.85957	3.68485	3.47021	3.84702
MSTRG.1683	chr1:111956836-111991998	-	35163	6.61556	5.87145	6.01805	8.57193	6.99042	9.20582
MSTRG.1687	chr1:111991267-112011273	+	20007	36.5844	35.5571	38.3264	40.3689	40.0862	32.7119
MSTRG.1688	chr1:112002145-112003641	-	1497	0.553752	1.36118	0.765096	0.30347	1.43531	1.10066
MSTRG.1691	chr1:112084652-112259313	+	174662	13.4044	9.82914	9.78725	11.6337	11.4722	10.4509
MSTRG.1693	chr1:112159481-112159696	-	216	1.25797	0	0.179565	0	0	0
MSTRG.1702	chr1:113015846-113022272	+	6427	1.31924	1.31327	1.26788	0.801745	0.350654	2.42612
MSTRG.1703	chr1:113022585-113026779	+	4195	0.565709	0.501779	0.629175	0.367505	0.232402	1.27547
MSTRG.1704	chr1:113041754-113043298	+	1545	0.57865	0.706508	1.1623	0.67034	0.302138	1.66257
MSTRG.1718	chr1:113239361-113243344	+	3984	10.8494	10.8406	9.71019	5.61725	5.73263	7.06737
MSTRG.1712	chr1:113379270-113380563	-	1294	1.55078	1.12175	0.886873	0.120866	0.373397	0.62854
MSTRG.1713	chr1:113381733-113382034	-	302	1.25223	1.10937	0.914707	0.157252	0	0.568975
MSTRG.1714	chr1:113385512-113386151	-	640	1.29202	0.574564	0.438483	0.21049	0.091363	0.165566
MSTRG.1715	chr1:113387991-113388608	-	618	0.903593	0.405338	1.11322	0.204407	0.126469	0.229849
MSTRG.1716	chr1:113390774-113391113	-	340	0.714808	0.810153	1.18826	0.278422	0	0.286945
MSTRG.1717	chr1:113392698-113400607	+	7910	6.97713	7.70193	7.17155	5.44309	5.67239	6.51751
MSTRG.1722	chr1:113443164-113518052	+	74889	2.84202	2.45149	6.03882	1.55178	0.796552	1.66449
MSTRG.1726	chr1:113581610-113586379	+	4770	1.03006	0.616844	1.01405	0.263336	0.067666	0.73127
MSTRG.1727	chr1:113615831-113669822	+	53992	2.31938	2.06733	2.15409	2.33562	1.94541	3.13099
MSTRG.1731	chr1:114051999-114052607	-	609	8.11846	6.68511	5.92128	7.79713	8.81837	8.10622
MSTRG.1733	chr1:114230536-114235497	+	4962	1.98011	1.80341	1.6161	2.70849	2.11083	3.26535
MSTRG.1743	chr1:114239827-114343873	-	104047	4.06707	4.1323	3.64105	4.9224	4.29702	5.29862
MSTRG.1750	chr1:114448031-114456707	+	8677	5.17078	5.38858	4.80902	7.19813	7.19882	7.65928
MSTRG.1735	chr1:114472250-114520426	+	48177	3.09643	3.74711	3.16074	4.9948	4.8344	4.599
MSTRG.1736	chr1:115107448-115109086	-	1639	1.14234	0.91749	0.725462	0.834384	0.617901	0.46525
MSTRG.1742	chr1:115125474-115147646	-	22173	0.852805	0.619491	0.917614	1.00947	0.956839	1.12628
MSTRG.1753	chr1:115260745-115267951	+	7207	0.518351	1.13229	0.530462	0.93197	1.11078	0.685792
MSTRG.1752	chr1:115263199-115301297	-	38099	127.932	126.402	129.061	109.337	93.2414	102.776
MSTRG.1757	chr1:115457899-115458125	-	227	1.5686	2.27265	1.89265	2.00699	2.94851	2.2507
MSTRG.1759	chr1:116519235-116612675	+	93441	7.48061	7.76122	7.75513	4.65436	4.96076	5.23837
MSTRG.1761	chr1:117029628-117034471	-	4844	1.1204	1.0591	1.0745	0.657188	0.320527	1.51906
MSTRG.1763	chr1:117038444-117038804	-	361	0.705713	1.20937	0.628602	0.300814	0.493478	0.91389
MSTRG.1764	chr1:117039277-117040070	-	794	1.23481	0.662163	0.709527	0.658122	0.072661	0.557859
MSTRG.1772	chr1:117117031-117210160	-	93130	9.94536	10.4632	10.1101	13.9747	14.768	11.7562
MSTRG.1774	chr1:117452679-117533174	+	80496	11.8206	4.05839	11.0222	17.118	7.44913	14.5725
MSTRG.1776	chr1:117602984-117644278	+	41295	4.22348	3.86071	3.7783	2.51861	2.02946	2.8337
MSTRG.1780	chr1:118319575-118320358	-	784	7.14327	7.28484	6.35803	6.12895	6.23563	8.64704
MSTRG.1784	chr1:118321146-118321460	-	315	1.00714	0.833512	0.161493	0.711027	0.497659	1.20352
MSTRG.1785	chr1:118378454-118393096	-	14643	0.948027	0.835049	0.971996	1.10415	0.939038	1.21627
MSTRG.1787	chr1:118472398-118509153	+	36756	11.7712	9.6689	9.63599	6.74495	6.72561	6.40573
MSTRG.1794	chr1:119569504-119683294	-	113791	5.54008	6.89913	5.014	4.28298	4.22759	3.91839
MSTRG.1798	chr1:119683048-119726812	+	43765	2.59119	2.4238	2.58368	2.04521	1.46703	2.05589
MSTRG.1800	chr1:119786608-119786997	+	390	0.608361	1.1621	1.45307	0.753347	0	0.955103
MSTRG.1801	chr1:119789259-119798455	+	9197	1.60514	1.56757	1.44066	0.406981	0.190097	1.02638
MSTRG.1790	chr1:120111264-120152378	-	41115	0.034846	0.02218	0.030603	0.597024	0.301708	1.10626
MSTRG.1804	chr1:120161308-120190954	-	29647	1.89787	1.27469	1.74878	1.0938	3.86239	3.94709
MSTRG.1809	chr1:120253925-120286828	-	32904	0.876605	1.27255	0.932277	0.882188	0.708909	0.649889
MSTRG.1807	chr1:120454176-120466528	-	12353	15.2901	7.25786	15.8159	7.60007	7.32151	16.1542
MSTRG.1816	chr1:121107083-121134581	+	27499	15.7958	16.0985	15.814	16.5199	13.9473	16.9125
MSTRG.1814	chr1:121318298-121322027	+	3730	1.13473	0.952449	0.696412	0.420985	0.144326	0.419159
MSTRG.1819	chr1:121484055-121485436	+	1382	1.03154	1.19135	0.976744	2.92254	2.90657	2.82123
MSTRG.1820	chr1:121484856-121485413	-	558	0.891139	1.49791	1.1285	0.620151	0.700864	1.42337
MSTRG.1829	chr1:142684846-142685838	+	993	0.980445	0.986543	1.34844	0.167228	0.270427	1.12538
MSTRG.1831	chr1:142693607-142694178	+	572	1.00546	0.66964	1.40293	0.35207	0.290998	1.23686
MSTRG.1838	chr1:142847678-142849301	-	1624	0	1.00609	1.36759	0	0.21507	0.875473
MSTRG.1841	chr1:143119058-143190977	+	71920	2.19356	1.71369	1.51915	1.17024	1.18235	1.59289
MSTRG.1844	chr1:143210159-143211290	+	1132	1.12559	1.17121	0.984491	0.288912	0.204205	0.825083
MSTRG.1821	chr1:143255175-143257081	+	1907	1.64177	1.32399	1.18835	0.290521	0.304882	0.503971
MSTRG.1859	chr1:143385350-143386922	-	1573	1.09147	0.845549	0.772139	0.290455	0.089462	0.538176
MSTRG.1860	chr1:143395287-143395667	-	381	1.48082	1.53191	0.913444	0.931935	0.148355	1.10094
MSTRG.1857	chr1:143397437-143467613	-	70177	3.54171	3.12857	3.37852	1.27331	1.0035	2.09
MSTRG.1849	chr1:143686406-143686679	-	274	1.70286	1.11366	1.44534	0.236584	0.278846	0.862984
MSTRG.1850	chr1:143687039-143688550	-	1512	1.1435	0.800531	1.16727	0.148878	0.044516	0.365072
MSTRG.1853	chr1:143690696-143694062	-	3367	1.01346	0.652324	1.14934	0.19366	0.088742	0.546973
MSTRG.1854	chr1:143716969-143721171	-	4203	2.9325	3.1072	3.01632	1.6713	1.93769	2.70182
MSTRG.1855	chr1:143743338-143744919	+	1582	1.21576	1.22306	1.02358	0.669297	0.380041	0.821438
MSTRG.1863	chr1:143896448-143914355	-	17908	5.87599	5.23524	6.34306	6.87089	5.20791	7.52034
MSTRG.1868	chr1:144146808-144188374	+	41567	3.46719	3.12161	3.41982	3.26717	2.46166	3.76313
MSTRG.1870	chr1:144295297-144295510	+	214	0.500314	0.343483	1.25394	0.217478	0	0.454556
MSTRG.1871	chr1:144300517-144341756	-	41240	1.46792	1.60548	1.27267	1.40056	1.42972	1.4539
MSTRG.1878	chr1:144593736-144621656	+	27921	4.53261	3.84589	4.07148	2.67848	2.40057	3.70319
MSTRG.1888	chr1:144697125-144978939	+	281815	1.94694	1.31837	1.86695	0.502222	0.235138	1.02615
MSTRG.1889	chr1:144814560-144830301	+	15742	7.69495	6.61789	6.91474	6.72399	5.8489	7.14738
MSTRG.1891	chr1:144890592-144932148	-	41557	1.78912	1.5518	1.44821	2.21434	2.21583	2.74385
MSTRG.1897	chr1:145001877-145018959	+	17083	2.12623	1.23284	2.83438	1.07778	0.223967	0.430469
MSTRG.1882	chr1:145096377-145119507	+	23131	20.1667	16.9319	20.5787	18.1303	21.8376	23.1614
MSTRG.1883	chr1:145096419-145103961	-	7543	0.093373	0.653315	0	1.57561	0	0
MSTRG.1880	chr1:145120011-145121552	+	1542	1.04517	0.972885	1.01836	0.458732	0.400243	1.29021
MSTRG.1881	chr1:145135158-145139569	-	4412	8.51933	0.191665	8.24871	11.2206	9.49481	10.7372
MSTRG.1885	chr1:145209119-145357011	+	147893	4.28009	4.07418	4.2695	4.32066	3.94336	4.4898
MSTRG.1886	chr1:145359013-145366376	+	7364	2.16536	0.001659	0	0	0	0.032013
MSTRG.1887	chr1:145362093-145370207	+	8115	25.5563	23.1313	26.0359	20.9659	17.5268	21.8773
MSTRG.1899	chr1:145456514-145476857	-	20344	2.70596	2.2343	2.39185	1.22901	0.999946	1.00015
MSTRG.1902	chr1:145477085-145501670	+	24586	17.6248	12.4645	16.5463	20.0922	19.0623	16.3705
MSTRG.1903	chr1:145507557-145515978	+	8422	16.0902	12.4875	11.7429	8.94524	9.72807	9.15848
MSTRG.1905	chr1:145575233-145586546	+	11314	4.56328	4.44689	4.64751	7.67375	8.2665	7.93525
MSTRG.1906	chr1:145586124-145611025	-	24902	5.77172	4.31818	4.38505	3.91822	4.19218	4.74068
MSTRG.1907	chr1:145611036-145700464	+	89429	3.36586	3.98355	3.58799	3.14454	3.16603	3.76357
MSTRG.1910	chr1:145746379-145746639	-	261	0.392652	1.09243	0.467687	0.072175	0.070943	0.760764
MSTRG.1915	chr1:146032648-146253168	-	220521	5.00793	4.12876	5.07817	3.97532	3.31478	4.77134
MSTRG.1918	chr1:146077445-146077701	+	257	0.16545	0.64353	0.402223	0.548507	0.43456	1.16336
MSTRG.1921	chr1:146420024-146467712	+	47689	2.81974	2.08013	2.36045	2.27617	1.98707	3.14099
MSTRG.1914	chr1:146471411-146471964	-	554	1.16865	0.630353	0.402432	0.643344	0.701702	0.334229
MSTRG.1925	chr1:146714396-146767443	+	53048	6.4371	6.69928	6.26994	4.25629	3.6031	4.34934
MSTRG.1923	chr1:147071988-147097972	+	25985	3.88212	4.11155	4.07824	5.16162	5.21761	4.89502
MSTRG.2013	chr1:147574324-148347051	-	772728	10.1582	8.29334	9.46869	7.83897	6.27	8.82548
MSTRG.2016	chr1:147619281-147619537	+	257	0.16545	0.64353	0.402223	0.548507	0.43456	1.16336
MSTRG.2025	chr1:147751372-147764015	+	12644	1.22524	1.74186	1.23703	0.956805	0.90915	0.959961
MSTRG.2038	chr1:147873915-147874188	-	274	1.70286	1.11366	1.44534	0.236584	0.278846	0.862984
MSTRG.2041	chr1:147903471-147933058	-	29588	2.00519	1.68287	1.78551	1.24724	1.11466	1.96009
MSTRG.2048	chr1:148193220-148194642	+	1423	1.5927	2.21262	0.282926	4.86134	5.77046	4.34244
MSTRG.2053	chr1:148349100-148351259	-	2160	1.57715	1.13973	1.4279	0.377258	0.28609	1.2049
MSTRG.2055	chr1:148353248-148354048	-	801	2.27793	1.36294	1.67078	1.71596	1.54693	2.33159
MSTRG.2056	chr1:148354665-148361358	-	6694	2.77275	2.52763	2.80007	1.47832	1.42552	2.10633
MSTRG.1943	chr1:148556095-148758311	+	202217	10.3433	9.10125	9.90288	7.75477	6.91729	9.39335
MSTRG.1941	chr1:148859001-148859503	-	503	4.90147	3.88947	5.71843	6.52926	3.39968	6.4128
MSTRG.1953	chr1:148943351-148943965	+	615	0.678433	0.735683	1.12379	0.354953	0.337206	0.904321
MSTRG.1954	chr1:148945685-148946097	+	413	1.60636	1.33648	0.920859	0.537569	0.42167	0.907229
MSTRG.1955	chr1:148946463-148946999	+	537	1.48003	1.0313	0.848427	0.695695	0.136834	1.27175
MSTRG.1950	chr1:148952722-148953712	+	991	0.911327	1.12616	0.546078	0.483127	0.249781	0.871867
MSTRG.1962	chr1:149264849-149265453	+	605	0.822208	1.14974	0.746274	0.012995	0	0.373009
MSTRG.1963	chr1:149271316-149271740	+	425	1.11362	0.199656	0.655968	0.314924	0.068791	0.395771
MSTRG.1964	chr1:149276790-149664204	+	387415	1.36692	1.26058	0.849675	0.294164	0.318824	0.436138
MSTRG.1966	chr1:149284645-149677245	+	392601	0.451115	1.05132	1.05382	0.678537	0.62495	0.823055
MSTRG.1974	chr1:149397008-149397277	-	270	0.451568	0.448961	0.513292	0.306047	0.110448	1.12391
MSTRG.1982	chr1:149576286-149670302	+	94017	1.58784	1.73249	2.83429	1.16684	1.76403	1.87706
MSTRG.1991	chr1:149672164-149672595	+	432	0.960813	1.55077	0.543416	0.324295	0.449595	0.275188
MSTRG.1959	chr1:149778115-149779041	-	927	1.19876	1.09342	1.51118	0.999622	0.451623	3.49098
MSTRG.1996	chr1:149804223-149818053	+	13831	3.64825	4.66945	0.715216	2.56503	2.29362	2.7945
MSTRG.1999	chr1:149816065-149832714	-	16650	5.00253	4.26641	5.19832	2.00999	1.76189	3.97725
MSTRG.2006	chr1:149898274-149899718	-	1445	37.623	39.2506	53.8206	48.2992	59.1576	46.705
MSTRG.2007	chr1:149900544-149908293	-	7750	2.81232	2.17557	3.12521	3.10953	3.43781	3.72895
MSTRG.2008	chr1:149909154-149982700	-	73547	4.98473	4.70481	5.17231	6.94742	5.893	7.04249
MSTRG.2009	chr1:150017965-150019876	-	1912	1.37226	0.971426	1.35547	0.573424	0.384718	0.46103
MSTRG.2012	chr1:150039364-150039757	-	394	2.59833	1.3349	1.57017	1.24993	0.729172	0.973996
MSTRG.2011	chr1:150039823-150064080	+	24258	5.60574	6.01748	5.93035	4.98239	4.45337	5.39023
MSTRG.2058	chr1:150192840-150208303	-	15464	46.024	45.8857	42.5803	42.617	40.5284	42.7247
MSTRG.2059	chr1:150192975-150201561	+	8587	1.18882	0.427219	1.37962	1.92162	1.22365	1.27243
MSTRG.2060	chr1:150239497-150241399	-	1903	15.6223	17.6973	20.7523	12.5406	14.2702	12.4875
MSTRG.2064	chr1:150266278-150280826	-	14549	0.48726	1.46756	0.772073	0.689127	0.655527	0.409664
MSTRG.2062	chr1:150281739-150282210	+	472	2.49539	1.48214	2.21498	1.25131	0.839094	1.14149
MSTRG.2065	chr1:150334486-150334710	+	225	0.198068	1.22165	0.232444	0.196292	0	0.319901
MSTRG.2067	chr1:150337184-150449042	+	111859	12.2588	12.8017	12.2662	9.89134	9.02502	9.99416
MSTRG.2068	chr1:150459918-150470063	+	10146	8.59338	7.86498	9.10125	9.21572	9.58449	7.84125
MSTRG.2069	chr1:150508333-150508567	-	235	0.993498	1.20094	0.197161	0	0	0
MSTRG.2072	chr1:150521897-150533413	+	11517	4.69345	4.85317	3.84266	3.62375	3.44693	4.3631
MSTRG.2077	chr1:150551712-150552062	+	351	1.31953	1.62353	1.16102	1.1505	0.626925	0.67938
MSTRG.2078	chr1:150558156-150602072	-	43917	7.18589	6.76412	7.19966	3.60323	3.03619	6.18768
MSTRG.2079	chr1:150594602-150595021	+	420	0.414122	0.778347	0.836146	0.111941	1.11886	0.874607
MSTRG.2080	chr1:150595291-150602075	+	6785	1.35647	1.0351	1.36852	1.18899	1.46701	1.29273
MSTRG.2081	chr1:150603476-150608256	+	4781	2.04099	1.28599	1.30719	0.356101	0.149208	0.810046
MSTRG.2084	chr1:150618701-150693361	-	74661	9.34641	7.97555	8.80079	6.93127	6.28396	7.14924
MSTRG.2085	chr1:150646294-150738433	-	92140	8.12449	11.6469	9.30523	4.85025	7.0897	6.76075
MSTRG.2087	chr1:150782181-150849085	-	66905	9.9827	11.462	11.1857	9.84211	8.75697	7.39237
MSTRG.2089	chr1:150898825-150933366	+	34542	7.57544	7.25574	6.48358	4.79159	5.03712	4.89185
MSTRG.2090	chr1:150937649-150947302	-	9654	30.7453	32.7222	35.3975	37.8841	37.3617	33.1688
MSTRG.2092	chr1:150941457-150947225	+	5769	0.584522	0.617075	0.508378	0.153067	1.12354	0.299007
MSTRG.2095	chr1:150965688-150979333	-	13646	2.72818	2.30922	2.18925	2.07321	1.901	2.01939
MSTRG.2096	chr1:150980896-151008187	+	27292	5.12113	5.1783	4.75125	5.2	4.55192	5.25548
MSTRG.2101	chr1:151029204-151040973	+	11770	2.25529	1.87175	1.93614	3.0674	1.83319	2.62141
MSTRG.2102	chr1:151043080-151098017	+	54938	1.43643	3.96715	3.186	1.2239	0.595209	1.84787
MSTRG.2104	chr1:151138555-151141609	+	3055	7.22498	5.8012	8.4131	6.8674	7.23303	4.84942
MSTRG.2109	chr1:151236419-151237674	-	1256	0.912643	1.40382	0.664526	1.1496	0.672715	0.58945
MSTRG.2110	chr1:151238505-151239882	-	1378	0.984683	1.11431	1.63746	0.582981	0.71717	0.337247
MSTRG.2112	chr1:151255012-151264379	+	9368	3.9619	4.28082	4.41418	7.01932	4.86048	5.43764
MSTRG.2113	chr1:151265099-151299853	-	34755	8.77939	9.4191	7.7962	11.1264	12.1926	9.86035
MSTRG.2116	chr1:151316225-151319704	-	3480	18.3896	15.6343	18.1975	15.5316	15.0084	16.5155
MSTRG.2125	chr1:151512810-151556059	+	43250	21.055	19.4301	20.1172	18.6193	20.675	18.5899
MSTRG.2130	chr1:151609089-151641837	+	32749	4.54019	2.70009	3.4491	4.5955	6.91978	6.81028
MSTRG.2136	chr1:151732130-151762998	-	30869	8.16954	7.59822	7.01769	5.87668	6.24711	6.1889
MSTRG.2132	chr1:151843328-151881978	-	38651	3.96399	3.50053	3.93475	3.53945	3.17138	4.06
MSTRG.2133	chr1:151879457-151880099	+	643	1.21107	1.70422	0.551892	6.70105	4.50803	4.85502
MSTRG.2140	chr1:151955391-151966403	+	11013	0.652612	0.998064	1.45057	2.23841	2.15453	1.81984
MSTRG.2143	chr1:152004982-152009485	+	4504	1.03904	1.58154	1.04962	2.07825	2.47478	2.33477
MSTRG.2145	chr1:153422999-153508698	-	85700	239.53	276.061	283.574	253.959	296.385	248.197
MSTRG.2146	chr1:153422999-153508887	+	85889	1.6418	2.77265	2.25017	2.46941	3.60314	2.31073
MSTRG.2152	chr1:153515888-153530695	+	14808	2.45278	2.21199	2.29701	0.747578	0.447679	1.18291
MSTRG.2154	chr1:153519989-153522096	-	2108	2.73579	3.36349	2.98316	16.1221	14.3955	16.1732
MSTRG.2155	chr1:153530746-153533608	+	2863	1.86597	1.99631	2.61372	0.746936	0.405269	1.22089
MSTRG.2150	chr1:153574292-153578057	-	3766	2.16502	1.87061	2.33681	2.13491	1.77979	2.30395
MSTRG.2158	chr1:153579369-153585631	+	6263	0.538839	0.706538	0.661066	0.970141	1.69041	0.58229
MSTRG.2157	chr1:153579451-153585559	-	6109	47.2589	31.415	47.5121	62.0897	75.8837	76.4195
MSTRG.2159	chr1:153586734-153589738	-	3005	3.4327	2.30447	2.88015	7.40684	9.92868	7.84311
MSTRG.2160	chr1:153591263-153606525	-	15263	31.2993	28.1075	22.7646	32.3953	36.637	35.7974
MSTRG.2161	chr1:153591280-153599970	+	8691	0.475919	1.1904	0.922818	0.87934	1.23794	0.325521
MSTRG.2163	chr1:153606556-153618778	+	12223	14.9418	19.8586	19.8457	21.3928	16.5829	20.4126
MSTRG.2166	chr1:153634467-153635667	+	1201	0.485493	1.11579	0.910346	0.837804	0.636273	0.752034
MSTRG.2165	chr1:153634541-153643458	-	8918	126.018	122.549	119.332	165.31	177.513	163.203
MSTRG.2167	chr1:153650890-153666468	+	15579	8.37198	8.13935	6.5718	3.14152	3.09064	3.20532
MSTRG.2168	chr1:153700543-153746555	+	46013	6.05206	6.52527	6.07028	6.26215	5.20993	6.29639
MSTRG.2171	chr1:153777201-153894506	-	117306	3.69619	3.67969	5.61062	12.3774	8.28457	8.97749
MSTRG.2176	chr1:153904652-153919174	-	14523	5.22298	5.17716	4.96464	5.61625	5.78085	6.09938
MSTRG.2179	chr1:153920151-153936048	-	15898	18.2129	13.7327	32.8278	16.7477	35.7488	14.4424
MSTRG.2180	chr1:153932268-153932585	+	318	1.34185	0.740894	0.824533	0.644152	1.35393	0.84174
MSTRG.2181	chr1:153936199-153936615	+	417	1.55504	3.37514	2.28154	0.96194	0	1.4761
MSTRG.2185	chr1:153944058-153950164	-	6107	49.7462	62.5251	38.7216	44.3633	49.7098	42.0325
MSTRG.2186	chr1:153949895-153950163	+	269	0.747194	1.39576	0.452517	0.379567	0.535452	0.407389
MSTRG.2177	chr1:153952789-153958828	-	6040	39.5376	39.3275	27.0325	17.295	29.1307	25.9349
MSTRG.2178	chr1:153954277-153958838	+	4562	3.13448	3.14687	3.21426	1.38606	2.24337	1.7688
MSTRG.2188	chr1:153963235-153973368	+	10134	305.613	321.814	309.355	234.253	286.765	252.104
MSTRG.2189	chr1:153963246-153964622	-	1377	5.32375	3.04837	4.37639	5.34396	6.72574	4.49382
MSTRG.2197	chr1:154129770-154155690	+	25921	0.17653	0.996673	1.10077	1.18212	1.46793	0.994181
MSTRG.2201	chr1:154186941-154193059	+	6119	0.824239	1.77969	1.02866	0.271621	0.133257	0.443041
MSTRG.2202	chr1:154193443-154243649	+	50207	20.5165	20.1441	19.1399	16.9622	15.3772	15.8653
MSTRG.2203	chr1:154201186-154209509	-	8324	1.30849	0.858411	1.0176	1.56045	0.824164	0.840011
MSTRG.2206	chr1:154298029-154323779	+	25751	0.469605	0.365944	0.450786	2.77972	2.46382	2.80888
MSTRG.2211	chr1:154521053-154531384	-	10332	14.4197	9.87952	9.06972	13.9487	14.569	13.6096
MSTRG.2213	chr1:154530952-154531181	+	230	0.514608	3.26233	2.31817	5.47581	5.15064	5.86049
MSTRG.2216	chr1:154557285-154600388	-	43104	29.2742	29.0632	28.0064	26.9972	26.3898	25.1193
MSTRG.2214	chr1:154644089-154652309	+	8221	0.198456	0.20292	0.116372	1.41682	1.46499	1.28417
MSTRG.2219	chr1:154918421-154918884	+	464	0.280361	0.994691	1.05604	2.28819	2.30109	1.80759
MSTRG.2218	chr1:154920129-154928580	-	8452	13.6035	13.1879	13.248	23.1418	23.9554	20.6617
MSTRG.2221	chr1:154933462-154934109	+	648	0.4955	1.00663	0.058926	0	1.29453	0.041296
MSTRG.2220	chr1:154934774-154946812	-	12039	15.4004	15.4781	14.7144	13.5834	14.1704	13.7688
MSTRG.2225	chr1:154955843-154965587	+	9745	7.85483	7.02338	7.32836	8.28979	8.57379	7.46608
MSTRG.2228	chr1:154994540-154995005	-	466	0.232309	0	0	0.640334	0.193653	1.19552
MSTRG.2232	chr1:155017667-155023657	-	5991	6.05675	6.39928	6.42147	4.86765	5.01366	5.64552
MSTRG.2233	chr1:155033266-155034977	-	1712	0.721001	1.39366	0.875843	0.488318	0.967113	1.56648
MSTRG.2229	chr1:155036237-155042014	+	5778	3.31003	3.20114	4.59415	9.19987	8.99298	9.14299
MSTRG.2235	chr1:155107867-155111327	+	3461	9.20876	8.92351	7.90356	15.2291	6.49508	12.3619
MSTRG.2236	chr1:155141884-155162700	-	20817	4.34755	3.98022	4.18903	4.31416	5.17854	4.63764
MSTRG.2244	chr1:155179039-155197309	-	18271	2.12141	0.870472	2.25437	1.21315	1.22432	1.44257
MSTRG.2239	chr1:155204243-155214386	-	10144	5.33571	4.77134	5.75021	8.53763	8.48011	8.38759
MSTRG.2245	chr1:155217008-155225274	-	8267	6.81495	6.74086	5.30388	8.57289	9.28636	9.53554
MSTRG.2246	chr1:155225798-155232130	-	6333	18.9857	20.3321	20.5934	26.241	28.1331	24.9978
MSTRG.2247	chr1:155232671-155243078	-	10408	15.2526	14.7278	12.6335	7.31407	8.79647	11.1638
MSTRG.2248	chr1:155247218-155259637	+	12420	0.796784	1.73065	1.95539	1.53074	1.88514	1.04593
MSTRG.2250	chr1:155277621-155278373	-	753	0.185698	0.111232	0.208832	0.607553	1.09619	0.645536
MSTRG.2251	chr1:155278776-155290456	+	11681	37.8247	38.939	35.3738	29.9307	28.0455	27.0001
MSTRG.2253	chr1:155293316-155300905	+	7590	6.77095	8.55633	7.28005	7.5151	7.85114	7.72773
MSTRG.2263	chr1:155305846-155658766	-	352921	12.505	12.0213	12.3629	10.1985	9.12925	11.1591
MSTRG.2269	chr1:155437389-155441257	-	3869	1.39772	1.28862	0.917888	0.392994	0.368165	0.827054
MSTRG.2271	chr1:155534843-155540529	+	5687	2.59395	2.80271	1.95145	0.695927	0.403645	1.30195
MSTRG.2276	chr1:155580054-155584722	+	4669	2.99228	2.51437	2.45042	2.15219	2.09204	2.70174
MSTRG.2277	chr1:155658874-155708762	+	49889	27.2043	27.7588	25.5256	23.9072	24.2576	23.706
MSTRG.2279	chr1:155715575-155717962	+	2388	3.09398	2.48328	2.56701	1.83403	1.98705	2.32225
MSTRG.2280	chr1:155717727-155719389	-	1663	1.4966	0.901333	0.849931	1.7621	1.30721	1.18689
MSTRG.2282	chr1:155720726-155721370	+	645	1.79895	1.63085	1.62116	0.27586	0.39465	0.808387
MSTRG.2281	chr1:155792238-155826995	-	34758	3.88125	3.57854	3.59954	3.73293	3.36835	3.74857
MSTRG.2254	chr1:155870065-155880953	-	10889	7.53995	8.4021	8.07638	11.535	9.69933	9.46615
MSTRG.2255	chr1:155882836-155904181	-	21346	31.6374	27.7102	29.5664	23.5657	19.947	31.6904
MSTRG.2259	chr1:155916647-155953454	-	36808	21.7925	19.054	19.8249	14.8979	15.9741	15.5571
MSTRG.2260	chr1:155920623-155920928	+	306	0.115567	0.267396	0	0.178476	1.09683	0.150991
MSTRG.2285	chr1:156005092-156023561	-	18470	19.3745	17.2571	20.3267	16.0906	18.9254	17.7466
MSTRG.2287	chr1:156024612-156028297	+	3686	25.0902	19.3018	24.0582	24.612	20.3044	22.5879
MSTRG.2291	chr1:156084505-156108888	-	24384	1.65146	2.15269	1.53251	1.92316	2.50524	1.68841
MSTRG.2290	chr1:156096336-156109879	+	13544	38.4136	35.6543	37.859	38.8493	43.9995	35.6498
MSTRG.2292	chr1:156163441-156182586	+	19146	4.12365	3.32182	4.03116	8.51844	9.24527	9.21328
MSTRG.2302	chr1:156278783-156307997	-	29215	81.1913	84.506	84.0033	107.05	117.642	90.3383
MSTRG.2303	chr1:156278907-156308012	+	29106	0.547312	0.632009	0.570983	0.991852	1.7616	1.02966
MSTRG.2299	chr1:156433519-156465013	-	31495	9.80218	9.26526	10.0707	7.88075	8.17739	8.15413
MSTRG.2300	chr1:156449503-156452261	+	2759	0	0	0	0	1.3143	0.535623
MSTRG.2306	chr1:156495197-156542332	-	47136	18.4744	15.5271	17.7838	5.67638	4.3811	7.05667
MSTRG.2311	chr1:156561684-156563921	+	2238	12.4743	12.799	11.426	16.5846	16.238	15.6286
MSTRG.2313	chr1:156564608-156565723	+	1116	0.604009	0.901485	1.17772	0.873346	0.804256	0.689101
MSTRG.2312	chr1:156565398-156571262	-	5865	17.6683	14.6214	13.9498	11.5992	12.0238	12.104
MSTRG.2308	chr1:156607575-156631216	-	23642	10.7483	10.1004	10.6329	1.14209	0.843672	1.50992
MSTRG.2310	chr1:156638558-156647189	-	8632	6.93974	5.89239	6.11109	20.9967	22.2345	21.5744
MSTRG.2314	chr1:156669398-156686580	-	17183	2.2727	2.2634	1.7941	17.751	19.8354	16.3792
MSTRG.2315	chr1:156669733-156670703	+	971	0	0	0	0.886699	1.75685	0.913279
MSTRG.2316	chr1:156686846-156687987	-	1142	1.20564	0.594704	0.554786	2.39308	2.56879	4.29492
MSTRG.2318	chr1:156698741-156706741	+	8001	4.63033	4.34293	5.51494	4.5123	5.21882	4.09841
MSTRG.2321	chr1:156711915-156721547	+	9633	1.63455	2.64462	1.94073	2.23953	2.49334	1.71573
MSTRG.2323	chr1:156721709-156726551	+	4843	1.11285	0.630532	0.986751	0.146233	0.148365	0.182713
MSTRG.2324	chr1:156724561-156725915	+	1355	1.51199	1.31322	0.993696	0.241598	0.043153	0.387059
MSTRG.2322	chr1:156737345-156770563	+	33219	13.8836	16.6774	16.3894	23.7781	26.9738	25.044
MSTRG.2328	chr1:156878462-156886220	+	7759	1.3759	1.0274	1.23523	1.19726	1.047	2.22377
MSTRG.2331	chr1:156904637-157014865	-	110229	5.75759	5.83457	5.76882	6.96198	7.05291	8.28533
MSTRG.2329	chr1:157090995-157108266	-	17272	6.24354	7.18039	5.66169	12.1955	12.0812	7.96608
MSTRG.2334	chr1:157963120-158070052	+	106933	13.8392	14.8231	5.11569	15.8658	12.7192	4.34404
MSTRG.2338	chr1:158971374-158985447	-	14074	0.95661	0.888	2.00322	0.546186	0.299277	0.4735
MSTRG.2339	chr1:159023369-159024667	-	1299	0.100434	1.15585	0.331161	0.35715	0.269798	0.727951
MSTRG.2345	chr1:159824751-159837475	+	12725	5.56475	2.65063	2.36801	1.30476	0.8288	1.79382
MSTRG.2341	chr1:159887982-159895284	+	7303	1.0234	0.945281	0.915602	1.43848	2.03519	1.5288
MSTRG.2340	chr1:159888628-159894341	-	5714	147.773	156.325	163.178	191.278	219.191	175.674
MSTRG.2355	chr1:160180273-160232304	-	52032	6.89835	6.28611	7.27449	3.83479	3.76156	4.95974
MSTRG.2356	chr1:160182989-160183454	-	466	0.654774	0.392486	0.677102	0.647499	1.31783	0
MSTRG.2361	chr1:160288007-160288259	+	253	3.61638	4.39893	4.7202	4.61511	4.57147	3.91731
MSTRG.2363	chr1:160313177-160326724	+	13548	16.8393	15.6305	15.0329	8.4541	8.80192	7.95491
MSTRG.2366	chr1:160930244-161015702	-	85459	10.0145	9.60295	11.3144	10.8978	14.0142	13.9418
MSTRG.2364	chr1:161040884-161047263	-	6380	0.45134	0.171673	0.420014	0.912965	0.626583	1.01236
MSTRG.2371	chr1:161070392-161087842	+	17451	1.63803	1.25598	1.69182	1.38236	2.37365	0.400203
MSTRG.2373	chr1:161092123-161101898	-	9776	6.3799	6.52829	3.81212	8.24926	7.68811	8.02894
MSTRG.2374	chr1:161102313-161103403	+	1091	1.1335	0.695976	0.78819	0.395968	0.099687	0.675104
MSTRG.2376	chr1:161123784-161128646	+	4863	34.6771	36.334	37.5129	24.416	24.8654	21.8625
MSTRG.2382	chr1:161172139-161184029	+	11891	22.8084	22.1699	21.0479	16.2266	16.2089	15.2945
MSTRG.2383	chr1:161284171-161341754	+	57584	8.24892	5.16038	8.89617	2.81579	4.76226	2.19323
MSTRG.2387	chr1:161719570-161726952	+	7383	15.5074	13.7606	13.6016	12.6843	16.8856	13.8944
MSTRG.2389	chr1:161736084-161937550	+	201467	13.1073	11.7268	12.8562	10.5089	10.2854	10.2017
MSTRG.2392	chr1:162039566-162356608	+	317043	2.44564	2.43465	1.98673	3.27863	3.29813	3.52543
MSTRG.2400	chr1:162531333-162569621	+	38289	43.8803	42.7247	41.0348	41.2811	43.6481	39.1066
MSTRG.2423	chr1:165696775-165738074	-	41300	16.2422	20.084	15.6996	25.1207	28.0852	25.9307
MSTRG.2424	chr1:165712461-165738106	+	25646	0.618362	0.786573	1.07624	1.36276	1.38445	0.961831
MSTRG.2427	chr1:165796768-165880855	+	84088	25.256	24.9563	23.8494	15.1385	17.5077	15.1164
MSTRG.2422	chr1:165892275-165899566	+	7292	0.374635	0.376154	0.403594	1.1061	0.992901	1.14569
MSTRG.2429	chr1:166808684-166825581	+	16898	8.914	9.72012	9.35848	7.28773	7.92538	7.6618
MSTRG.2436	chr1:167691226-167691427	-	202	2.41075	1.66431	1.63339	1.39335	3.35588	1.89505
MSTRG.2435	chr1:167691230-167760056	+	68827	3.80874	3.96534	3.71285	5.88676	6.87442	6.31884
MSTRG.2438	chr1:167937728-168045072	+	107345	10.6523	11.6037	9.78316	12.0631	10.2344	10.138
MSTRG.2440	chr1:168024599-168025660	-	1062	16.3378	15.3712	14.6111	12.5856	12.9317	12.2688
MSTRG.2442	chr1:168048630-168106268	-	57639	1.24746	0.822631	1.33129	3.5775	3.13878	3.61277
MSTRG.2443	chr1:168195246-168222263	+	27018	11.221	11.1611	12.3349	14.6194	14.604	12.4004
MSTRG.2449	chr1:169075573-169101996	+	26424	44.6393	45.8864	37.5919	173.4	188.394	163.949
MSTRG.2450	chr1:169075881-169076156	-	276	0.53605	0.208854	0	0.961846	1.93636	1.73006
MSTRG.2463	chr1:169762283-169763830	-	1548	9.45824	5.68994	8.95518	4.34102	3.1091	4.41679
MSTRG.2460	chr1:169764184-169842493	+	78310	3.55547	3.84688	3.70551	2.69139	2.45631	3.32209
MSTRG.2467	chr1:170501292-170522587	+	21296	5.92289	4.12414	4.33412	4.46789	4.20896	5.59951
MSTRG.2471	chr1:171239064-171239479	-	416	0.645083	1.46874	1.06961	0.989376	1.44837	0.539418
MSTRG.2474	chr1:171454735-171562650	+	107916	28.0012	25.6082	25.8527	27.8578	22.3177	26.6927
MSTRG.2477	chr1:171501559-171505204	-	3646	2.8914	2.83955	2.44673	2.6129	2.85603	3.40423
MSTRG.2478	chr1:171750804-171766857	+	16054	7.56601	7.44304	7.12944	9.26374	9.50679	8.8064
MSTRG.2488	chr1:172502523-172580971	+	78449	4.18026	3.35168	2.53603	5.89092	6.6552	4.50401
MSTRG.2493	chr1:173764079-173793611	-	29533	7.94486	7.27822	6.79471	4.71824	3.28863	5.0877
MSTRG.2495	chr1:173810051-173827684	+	17634	12.9014	11.9839	9.34454	8.15296	6.50926	8.3844
MSTRG.2500	chr1:173833172-173837127	-	3956	40.5508	44.7927	47.351	19.2187	21.7879	20.1386
MSTRG.2502	chr1:173835005-173837112	+	2108	0.422484	2.49263	1.73939	0.843223	0.534548	0
MSTRG.2505	chr1:174128719-174964444	+	835726	1.36716	1.2197	1.21492	2.08962	2.02943	2.33599
MSTRG.2516	chr1:174968607-174980846	+	12240	40.5278	22.31	32.3089	28.8115	32.6714	27.6414
MSTRG.2517	chr1:174976305-174992561	-	16257	7.00115	6.014	6.48844	4.43995	5.39228	4.8376
MSTRG.2520	chr1:175076141-175076876	-	736	0.729602	1.09964	0.52166	1.1475	0.730992	1.72371
MSTRG.2522	chr1:175913968-176176114	-	262147	14.3348	13.443	12.4911	12.7778	11.6738	11.7596
MSTRG.2526	chr1:178062899-178453219	+	390321	1.79125	1.40314	1.36041	1.42666	1.34498	1.46767
MSTRG.2535	chr1:178694400-178890976	+	196577	8.46348	8.218	8.4697	9.96985	10.675	10.2237
MSTRG.2531	chr1:178994939-179045697	+	50759	15.4193	15.3513	13.7698	14.9675	14.8519	8.65201
MSTRG.2533	chr1:179046604-179047638	+	1035	0.235862	0.100175	0.480047	1.13426	1.83138	1.87971
MSTRG.2539	chr1:179051180-179065131	+	13952	7.91908	7.9817	7.20922	6.35742	6.43776	5.91263
MSTRG.2540	chr1:179052752-179053478	-	727	0.074454	0	0	0.545232	0.532175	1.26791
MSTRG.2541	chr1:179076853-179112204	-	35352	14.818	14.7526	16.2815	13.1352	12.1709	13.1199
MSTRG.2548	chr1:179262937-179327812	+	64876	16.0118	15.191	15.4341	27.9013	24.8394	25.6827
MSTRG.2549	chr1:179809203-179846934	-	37732	7.48105	10.3169	11.0061	17.4754	17.0311	18.7623
MSTRG.2553	chr1:179955317-180084010	+	128694	7.15683	10.267	9.21929	7.21516	6.14621	12.0072
MSTRG.2556	chr1:180124032-180168897	+	44866	9.62847	10.5033	9.7827	9.18012	9.33244	8.49205
MSTRG.2571	chr1:181013850-181031074	+	17225	0.851094	0.831449	0.747266	1.017	1.16627	1.24014
MSTRG.2572	chr1:181057848-181062035	+	4188	38.1192	34.0145	37.0389	78.4404	97.7863	91.8282
MSTRG.2573	chr1:181057853-181059483	-	1631	0.931559	0.774334	0.607105	1.78597	2.32109	2.32373
MSTRG.2576	chr1:182806325-182808691	-	2367	1.62384	1.70889	1.23669	0.413105	0.327893	0.550856
MSTRG.2577	chr1:182808869-182856882	+	48014	44.672	42.0134	41.5116	48.0292	53.1074	48.8643
MSTRG.2579	chr1:182910946-182911236	-	291	12.8712	14.9959	12.503	14.8603	16.0084	13.9309
MSTRG.2583	chr1:183103825-183114725	+	10901	25.7871	22.6003	23.7695	30.5364	26.9911	26.5434
MSTRG.2584	chr1:183104273-183109574	-	5302	0.305505	0	0.897285	1.36658	0.822001	1.16675
MSTRG.2586	chr1:183217373-183387508	-	170136	2.26527	1.64294	2.15337	2.61999	2.12258	2.6617
MSTRG.2591	chr1:183441702-183523321	+	81620	15.3539	9.33642	8.33506	14.1986	9.88071	18.6951
MSTRG.2593	chr1:183532407-183560011	-	27605	2.86008	1.47887	2.09276	27.401	26.9155	25.3537
MSTRG.2594	chr1:183582348-183605036	+	22689	0.877607	0.844694	0.943196	11.7571	13.6848	12.5058
MSTRG.2595	chr1:183582689-183582934	-	246	0.374789	0.115589	0.153743	1.16602	0.550079	0.298
MSTRG.2596	chr1:183595329-183604817	-	9489	34.5217	32.6969	16.6648	22.6996	42.3527	21.5911
MSTRG.2597	chr1:183605201-183898007	+	292807	0.581693	0.44501	0.476339	2.45492	2.96512	2.52838
MSTRG.2588	chr1:184023495-184064980	+	41486	12.2843	12.3124	37.3707	6.89842	7.31187	5.42973
MSTRG.2589	chr1:184659637-184724007	-	64371	5.79732	4.11339	5.88693	7.66562	5.33054	8.53998
MSTRG.2601	chr1:184760164-185144413	-	384250	47.1246	42.6747	46.6014	21.2498	19.4797	13.4127
MSTRG.2605	chr1:185014668-185070189	+	55522	7.67629	7.0495	8.15858	12.7437	11.6292	12.0886
MSTRG.2616	chr1:185265520-185286405	-	20886	14.9468	13.9807	11.8148	9.53705	8.08065	11.38
MSTRG.2618	chr1:185918953-185919297	-	345	0.969597	0.733746	1.79394	6.87756	3.98513	17.7398
MSTRG.2619	chr1:185919645-185920469	-	825	0.345107	0.452639	0.456024	2.15702	0.976945	6.22421
MSTRG.2625	chr1:186280784-186344825	-	64042	32.2372	27.0039	26.0428	14.9177	7.85702	15.8468
MSTRG.2621	chr1:186640923-186649904	-	8982	1.96834	1.4662	1.58698	14.1773	11.0157	14.138
MSTRG.2623	chr1:186798085-186958113	+	160029	4.83615	4.09568	3.93645	28.1655	22.7295	26.4985
MSTRG.2629	chr1:192904726-192949378	-	44653	0.11547	0	0.056372	1.55139	1.24789	0.993329
MSTRG.2640	chr1:192987752-193028426	-	40675	18.208	14.7584	14.4576	12.859	10.4131	11.834
MSTRG.2642	chr1:193028552-193060904	+	32353	7.12213	5.76554	6.06217	6.80285	6.91944	10.8708
MSTRG.2633	chr1:193224303-193234493	+	10191	2.03207	1.63751	1.98531	1.01812	0.78554	1.22857
MSTRG.2637	chr1:193252356-193252776	+	421	1.1837	0.470494	0.541099	0.111299	0.157408	0.482068
MSTRG.2638	chr1:193253991-193257393	+	3403	0.99672	1.17568	1.05534	0.444943	0.38403	0.859741
MSTRG.2639	chr1:194376646-194376932	+	287	0	0.70095	0.573595	1.24103	0.226147	1.29787
MSTRG.2646	chr1:196876503-196902856	-	26354	1.82343	1.83325	1.5832	1.47254	1.14973	1.65523
MSTRG.2647	chr1:197053262-197115824	-	62563	24.5564	21.1344	23.1975	22.9997	11.9431	24.8476
MSTRG.2652	chr1:197473885-197744322	-	270438	2.65258	2.50707	2.26354	2.11276	1.80016	2.17015
MSTRG.2651	chr1:198004266-198010763	+	6498	0	0	0	0	0	1.73541
MSTRG.2664	chr1:200370099-200373509	-	3411	1.11551	0.94886	0.947232	0.502375	0.490497	0.769232
MSTRG.2665	chr1:200374068-200379137	-	5070	9.50697	17.1937	20.2595	24.1216	15.8886	16.2438
MSTRG.2667	chr1:200520630-200589862	-	69233	15.8692	13.0637	12.8862	19.9657	13.2665	19.7107
MSTRG.2668	chr1:200613167-200639097	-	25931	7.52955	7.49731	6.9203	5.19172	5.4217	5.2723
MSTRG.2672	chr1:200936156-200992829	-	56674	5.04992	6.56857	5.38306	5.37686	4.62973	8.09099
MSTRG.2673	chr1:200993089-200997920	+	4832	0.156922	0.291752	0.238189	1.33558	0.96792	2.53165
MSTRG.2674	chr1:201103901-201140691	-	36791	8.48758	8.65141	10.0956	10.5056	11.2979	9.30211
MSTRG.2675	chr1:201182224-201198080	+	15857	3.31548	2.24546	4.03868	0.300726	0.185601	0.492362
MSTRG.2678	chr1:201437878-201438391	+	514	0.440887	0.208489	0.395052	1.20943	1.4072	1.24694
MSTRG.2680	chr1:201457810-201476238	+	18429	0.154679	0.494712	0.793968	0.610948	1.08133	0.730447
MSTRG.2681	chr1:201476351-201503907	+	27557	3.76521	2.8559	3.29465	0.66983	0.481975	0.775606
MSTRG.2682	chr1:201592055-201796098	+	204044	0.995306	0.750808	0.939118	2.59757	2.11712	2.51416
MSTRG.2689	chr1:201798277-201861265	+	62989	14.4901	14.6329	14.0223	9.85744	7.3559	10.0134
MSTRG.2697	chr1:201954844-201956574	-	1731	0.959461	1.07982	0.89546	0.362417	0.168447	0.482766
MSTRG.2698	chr1:201964824-201979481	-	14658	2.52929	2.11258	1.86577	6.01897	5.00051	5.827
MSTRG.2692	chr1:202113606-202113855	+	250	0	0	0.537039	0.518591	0.671262	2.13375
MSTRG.2700	chr1:202300965-202311107	-	10143	38.1263	37.421	36.496	32.0666	31.0395	30.5852
MSTRG.2701	chr1:202317848-202557656	+	239809	1.76631	1.79945	2.12686	1.85288	0.353199	0.535342
MSTRG.2704	chr1:202440937-202441236	-	300	4.39281	5.25164	9.07179	4.78851	4.45094	3.80528
MSTRG.2709	chr1:202715005-202777546	-	62542	9.6029	8.07075	8.43885	16.2509	15.4817	15.4136
MSTRG.2713	chr1:202819478-202820592	-	1115	0.650992	0.350612	0.902699	1.24795	1.27468	1.83662
MSTRG.2719	chr1:202909954-202927137	-	17184	37.6971	31.9316	37.9129	33.4515	38.195	31.3912
MSTRG.2720	chr1:202915686-202920205	+	4520	0.646812	1.85893	0.45393	0.827343	1.14493	0.750513
MSTRG.2721	chr1:202931678-202936353	-	4676	3.34224	3.25195	4.23045	4.66503	5.21355	4.64713
MSTRG.2723	chr1:202976533-202976967	-	435	1.01681	1.07865	0	0.810282	1.47585	1.79839
MSTRG.2722	chr1:202976902-202993976	+	17075	20.8791	20.9941	20.1547	26.3354	29.5299	25.0563
MSTRG.2730	chr1:203447233-203447605	-	373	0.273784	0.148836	1.10477	0.095489	0.155717	0.087528
MSTRG.2732	chr1:203482141-203501631	+	19491	2.21023	1.32809	1.25852	0	0.326773	0.132136
MSTRG.2733	chr1:203679368-203713202	+	33835	5.62731	11.8996	4.60094	8.2582	20.9536	8.3354
MSTRG.2739	chr1:203764782-203823246	+	58465	32.8326	33.3714	32.9384	33.5514	30.9208	34.8902
MSTRG.2736	chr1:203825161-203825829	+	669	1.30964	0.76738	0.879613	0.408646	0.020685	0.17066
MSTRG.2737	chr1:203903362-203925772	+	22411	0.151115	0.236075	0.109412	1.2893	0.96872	1.28133
MSTRG.2743	chr1:204042393-204082136	-	39744	0.495511	0.531972	0.807768	0.86553	1.0801	1.20447
MSTRG.2742	chr1:204047257-204096869	+	49613	7.97767	7.10671	7.3501	9.93978	10.9523	10.4541
MSTRG.2748	chr1:204187981-204348175	-	160195	6.6857	5.92176	7.02792	5.8975	6.34031	6.77594
MSTRG.2752	chr1:204346574-204350537	+	3964	1.49041	2.07154	2.0711	0.322676	0.146929	0.40891
MSTRG.2754	chr1:204364940-204380919	-	15980	25.3196	27.6125	23.9352	28.9974	29.6186	36.2953
MSTRG.2755	chr1:204365023-204369176	+	4154	1.13394	0.8638	0.720432	0.111923	0.103272	0.146065
MSTRG.2756	chr1:204380063-204381603	+	1541	0.836449	1.03521	0.59655	0.27438	0.092837	0.299579
MSTRG.2757	chr1:204391760-204463852	-	72093	2.51675	2.52143	1.99545	2.8313	2.86376	3.89879
MSTRG.2747	chr1:204475656-204475870	+	215	1.22103	0.803431	1.20077	1.73026	1.82669	0.749482
MSTRG.2758	chr1:204485511-204527247	+	41737	4.9071	5.75433	2.14436	2.95949	2.844	6.00316
MSTRG.2772	chr1:205410919-205413951	-	3033	1.1681	0.750654	1.02785	0.887118	0.566922	1.08863
MSTRG.2780	chr1:205577071-205601090	-	24020	2.78602	13.8625	16.6909	7.61267	6.41971	9.0276
MSTRG.2776	chr1:205626979-205645775	-	18797	1.62264	1.54427	1.77507	4.64889	4.78877	5.57903
MSTRG.2782	chr1:205682322-205719399	-	37078	128.928	129.615	127.722	66.2457	57.6978	59.5428
MSTRG.2784	chr1:205687109-205719142	+	32034	1.11959	1.89947	1.81708	0.974609	1.18326	0.76939
MSTRG.2786	chr1:205738575-205744574	-	6000	14.688	11.4789	12.5526	23.2856	21.0755	21.1843
MSTRG.2788	chr1:205758222-205782876	-	24655	6.12241	7.4845	7.08469	8.93436	9.39421	10.1056
MSTRG.2787	chr1:205859126-205863962	+	4837	1.05419	1.56077	1.46337	0.325663	0.424311	0.63704
MSTRG.2789	chr1:206134415-206137828	-	3414	3.11026	0.905326	3.01901	1.05035	3.5308	4.64533
MSTRG.2791	chr1:206511411-206637776	+	126366	8.43543	8.00727	8.00439	8.2978	7.69156	9.40165
MSTRG.2794	chr1:206674114-206676908	+	2795	0.960747	1.0804	1.21527	0.681852	0.565546	1.24991
MSTRG.2799	chr1:206730889-206762602	+	31714	0.587691	0.504859	0.550998	1.95966	2.07691	2.34584
MSTRG.2802	chr1:206744620-206785816	-	41197	10.9112	10.4987	11.6658	4.21734	4.12301	4.81662
MSTRG.2803	chr1:206776317-206776524	+	208	1.21112	1.23036	0.482633	0.009894	0.008433	0
MSTRG.2797	chr1:206808881-206828501	+	19621	2.51007	1.95194	6.14746	9.96966	3.88777	10.8124
MSTRG.2804	chr1:206858268-206902081	-	43814	0.258425	0.843164	0.586297	0.984405	1.22095	0.781443
MSTRG.2805	chr1:206858289-206907613	+	49325	21.2083	15.3293	23.1504	31.7516	28.9345	30.6593
MSTRG.2807	chr1:207058677-207083290	-	24614	1.4309	1.93524	1.47261	0.602363	0.399486	0.665066
MSTRG.2811	chr1:207207761-207251168	+	43408	6.36273	6.98934	6.69061	9.87283	7.69699	13.3382
MSTRG.2814	chr1:207262239-207273338	+	11100	36.906	39.7999	36.2666	21.8772	19.6519	24.9816
MSTRG.2821	chr1:207482769-207487508	+	4740	1.34737	1.04414	1.19349	0.199445	0.095275	0.174811
MSTRG.2822	chr1:207494853-207547934	+	53082	37.8096	34.0118	31.0794	41.4682	43.4228	38.7765
MSTRG.2823	chr1:207495035-207533806	-	38772	0.507031	0.619544	0.689247	1.33682	1.26591	1.06044
MSTRG.2824	chr1:207549975-207551762	+	1788	1.15743	1.064	0.934543	0.575033	0.159698	0.990491
MSTRG.2825	chr1:207923448-207925353	-	1906	1.24879	0.829763	0.868583	0.34949	0.479906	0.30792
MSTRG.2826	chr1:207925468-207968569	+	43102	22.6049	22.8248	22.6118	29.5139	25.3897	24.1535
MSTRG.2828	chr1:207963920-207974783	-	10864	0.232392	0.307816	0.300717	0.777658	0.509946	1.59427
MSTRG.2830	chr1:208199449-208417665	-	218217	2.23546	2.36958	2.65689	2.71381	2.61445	3.23405
MSTRG.2832	chr1:209788220-209795980	+	7761	0.173012	0.534965	0.265597	0.463817	1.14141	0.650137
MSTRG.2831	chr1:209788322-209826460	-	38139	46.1206	36.7689	47.1172	69.8071	69.8021	62.9523
MSTRG.2833	chr1:209803119-209804078	+	960	0.080559	0.898653	0	0.271038	0.607737	1.13638
MSTRG.2840	chr1:210404803-210407545	-	2743	10.6524	10.1481	8.12912	4.41527	5.6606	4.41427
MSTRG.2841	chr1:210406144-210420264	+	14121	5.66423	7.90451	6.43431	1.2003	3.2536	2.79273
MSTRG.2845	chr1:211432775-211487014	+	54240	6.1519	5.6036	5.36714	5.22678	4.54657	5.72074
MSTRG.2846	chr1:211500179-211548127	+	47949	5.94627	4.88391	4.85033	3.10256	2.47255	3.82853
MSTRG.2847	chr1:211556162-211608427	+	52266	2.10998	1.54159	1.46676	0.639304	0.472151	0.612128
MSTRG.2852	chr1:211812845-211827993	+	15149	4.84609	7.15668	4.97569	1.56281	1.75705	1.58035
MSTRG.2856	chr1:211916799-212004064	-	87266	16.6792	14.6644	15.294	13.4737	6.68175	13.5532
MSTRG.2861	chr1:212110204-212208884	-	98681	12.2656	10.3058	10.7245	16.6054	15.0429	14.713
MSTRG.2863	chr1:212209848-212277936	+	68089	27.5479	24.6487	26.1415	15.9071	13.7513	15.9255
MSTRG.2869	chr1:212458879-212535202	+	76324	20.8342	20.7403	20.5938	21.387	22.0743	19.4316
MSTRG.2873	chr1:212495433-212588226	-	92794	1.78115	3.61244	1.86828	6.72868	4.41462	4.79494
MSTRG.2867	chr1:212603308-212606139	-	2832	3.20118	2.03376	2.32785	1.44522	0.748048	1.17596
MSTRG.2879	chr1:212763455-212763727	+	273	0.806963	1.14715	0.8923	0.934145	1.47359	1.84838
MSTRG.2885	chr1:212894093-212896448	-	2356	1.17469	0.764217	1.03618	0.584891	0.418356	0.763366
MSTRG.2887	chr1:212904673-212905749	-	1077	0.843163	0.782183	0.769638	0.616298	0.20088	1.14305
MSTRG.2890	chr1:213170542-213188835	-	18294	6.24253	5.29763	5.33959	4.01895	3.91242	4.4057
MSTRG.2891	chr1:213224597-213446807	+	222211	7.20999	7.07962	6.54934	11.6745	10.2199	11.6851
MSTRG.2892	chr1:214454576-214510473	+	55898	10.5523	11.3943	10.1122	10.9667	10.4582	10.5523
MSTRG.2893	chr1:214517515-214725792	-	208278	6.13952	3.64567	6.66465	5.53894	4.98674	7.58922
MSTRG.2899	chr1:214832338-214837132	-	4795	0.134163	0	0.232748	0.92874	1.30245	0.725178
MSTRG.2905	chr1:216321533-216321748	+	216	0.14571	0.078142	0.093037	0.633021	0.652783	1.6879
MSTRG.2911	chr1:217777573-217781477	-	3905	1.44669	1.27028	1.50281	1.13588	1.1056	1.54102
MSTRG.2912	chr1:217804684-218040930	+	236247	0.860804	1.05936	1.10153	0.532377	0.641602	0.343984
MSTRG.2917	chr1:218518520-218617338	+	98819	4.85973	6.43286	4.28427	15.3971	17.5846	16.0105
MSTRG.2915	chr1:218772748-218773192	-	445	1.6603	1.43099	1.80448	39.3903	31.3546	37.8649
MSTRG.2919	chr1:219347186-219392006	+	44821	1.87245	3.03302	2.08913	1.9332	2.23068	2.00154
MSTRG.2929	chr1:220200666-220263804	-	63139	11.009	8.497	9.42377	23.8826	25.9636	20.8705
MSTRG.2935	chr1:220428053-220428345	+	293	0.68753	0.2786	0.971855	1.28855	1.23231	0.778677
MSTRG.2937	chr1:220863716-220869965	-	6250	0.307241	0.35371	0.487397	0.90005	1.00127	0.970978
MSTRG.2938	chr1:220921567-220957526	+	35960	7.26143	6.64957	5.91009	3.66431	3.70343	3.91436
MSTRG.2939	chr1:220960196-220987730	+	27535	5.85027	5.52207	4.79787	3.85741	3.42655	4.67306
MSTRG.2941	chr1:221044930-221054794	-	9865	0.592297	1.16962	0.899604	0.372278	0	0.384149
MSTRG.2945	chr1:222121454-222132042	+	10589	0.016242	0	0.018361	0.6724	0.282195	1.15266
MSTRG.2946	chr1:222139683-222159311	+	19629	0	0.00909311	0.024945	1.79953	1.23003	2.81692
MSTRG.2949	chr1:222731650-222763228	-	31579	8.48212	6.54225	6.53829	6.04017	5.48633	5.97171
MSTRG.2954	chr1:222833519-222885866	-	52348	12.1807	12.8069	13.0654	12.6642	11.8995	12.0293
MSTRG.2956	chr1:222884838-222908538	+	23701	29.6354	27.9267	30.1465	39.2347	34.6079	34.2854
MSTRG.2957	chr1:222988403-223179663	+	191261	2.81984	2.38795	2.37359	4.63733	4.16647	4.64485
MSTRG.2951	chr1:223199753-223200078	-	326	0	0	0.160429	0.50355	0.257087	1.22577
MSTRG.2964	chr1:223934725-223947043	-	12319	1.123	0.853981	0.936307	0.680513	1.58402	1.55377
MSTRG.2963	chr1:223934810-223963720	+	28911	46.7382	56.8982	57.257	57.0287	57.6011	54.1159
MSTRG.2966	chr1:224033672-224034362	+	691	1.08439	1.15333	1.03956	0.667106	0.50518	0.165779
MSTRG.2968	chr1:224139096-224180296	-	41201	2.17865	1.99765	2.06255	0.625281	0.465726	1.04643
MSTRG.2970	chr1:224180436-224198314	+	17879	4.89746	4.29954	5.54617	2.1895	1.72828	4.82356
MSTRG.2975	chr1:224301817-224302017	-	201	0.31238	0.573569	0.249721	0.229181	1.13454	0
MSTRG.2980	chr1:224415036-224517889	-	102854	7.35547	5.86421	6.379	4.01973	3.45381	5.22513
MSTRG.2984	chr1:224544623-224563700	+	19078	6.89673	7.09373	8.27117	7.5982	7.79184	8.25965
MSTRG.2985	chr1:224572863-224622001	-	49139	9.36228	8.88903	9.95563	12.3607	11.2957	12.398
MSTRG.2987	chr1:224621523-224621892	+	370	0.434974	0.318384	0.375671	0.546777	1.10729	1.16721
MSTRG.2988	chr1:224716925-224725284	+	8360	0.103947	0.0369278	0.105584	1.16606	0.530245	1.12298
MSTRG.2998	chr1:225117363-225162236	+	44874	1.99692	1.74078	1.85913	1.88743	1.8312	2.04683
MSTRG.2996	chr1:225589205-225599119	-	9915	19.6994	18.114	18.6751	23.129	23.7009	21.8874
MSTRG.3000	chr1:225683182-225840747	-	157566	10.2422	9.39556	10.3218	16.9868	16.0195	17.8735
MSTRG.3001	chr1:225702553-225742649	+	40097	0.292986	1.05094	0.744197	2.12238	2.84422	1.92484
MSTRG.2999	chr1:225965515-225978168	+	12654	84.9432	78.522	86.1366	72.5376	73.98	74.3216
MSTRG.3003	chr1:226028164-226071741	-	43578	4.10102	4.47554	4.17757	3.6635	3.22834	4.52119
MSTRG.3007	chr1:226249978-226259702	+	9725	58.8819	60.3062	55.723	58.2299	65.4439	54.5123
MSTRG.3008	chr1:226250432-226259667	-	9236	0.646528	0.810485	0.698114	1.09577	1.38924	0.848958
MSTRG.3012	chr1:226346969-226374116	+	27148	0.891482	1.19106	1.01848	1.42399	1.19071	0
MSTRG.3016	chr1:226497239-226497637	+	399	0.929717	1.22073	1.02091	0.690728	1.08445	0.50482
MSTRG.3013	chr1:226543205-226543640	-	436	1.11029	0.523961	0.714087	0.106744	0.372828	0.860465
MSTRG.3021	chr1:226567753-226595524	+	27772	0.557017	1.33155	0.94123	1.4528	1.56053	0.957973
MSTRG.3030	chr1:227177567-227504883	-	327317	10.1481	9.07178	8.52717	13.077	7.49783	12.8776
MSTRG.3028	chr1:227854804-227855175	+	372	0.291011	1.13773	0.931769	0.103831	0	0.197081
MSTRG.3029	chr1:227856276-227857075	+	800	0.98964	1.19954	0.616454	0.148209	0	0.295691
MSTRG.3037	chr1:227919392-227972279	+	52888	3.25539	3.62715	3.3693	4.86654	5.07881	4.51061
MSTRG.3041	chr1:228270406-228285852	-	15447	0.894058	1.2786	1.0299	1.02942	1.09766	0.78249
MSTRG.3042	chr1:228286194-228286813	-	620	0.170823	1.17184	0.837885	0.477964	0.694437	0.390467
MSTRG.3044	chr1:228288844-228290234	+	1391	1.16613	2.84919	0.955009	1.62806	0.799037	1.1757
MSTRG.3045	chr1:228290872-228292504	+	1633	2.28997	1.235	1.7848	0.663155	0.724488	0.676472
MSTRG.3046	chr1:228294381-228296737	-	2357	4.27173	4.47811	3.80095	4.05354	4.15544	4.98935
MSTRG.3048	chr1:228350878-228352942	+	2065	2.96149	1.16745	1.76211	0.365529	0.632482	0.511378
MSTRG.3051	chr1:228370471-228372123	+	1653	1.05866	1.30162	1.6393	0.481987	0.387221	1.22165
MSTRG.3068	chr1:228400901-228548955	+	148055	4.56731	4.62965	4.50439	3.16463	2.49367	3.9127
MSTRG.3053	chr1:228581374-228594501	-	13128	2.11139	2.24267	1.91204	2.24616	3.22601	3.05357
MSTRG.3059	chr1:228686420-228687653	+	1234	1.25304	0.760417	0.989302	0.453606	0.279568	0.470189
MSTRG.3063	chr1:228784253-228785814	+	1562	7.19454	4.96975	6.33676	1.67857	1.14823	3.01076
MSTRG.3066	chr1:228870915-228882404	+	11490	2.96185	3.18553	2.39398	8.81108	9.48211	8.70899
MSTRG.3073	chr1:229065707-229085541	-	19835	0.123145	0.142499	0.0782824	2.09077	1.5788	2.69091
MSTRG.3074	chr1:229083299-229104124	+	20826	0.014244	0	0	1.43212	0.988998	1.67522
MSTRG.3075	chr1:229312702-229312935	+	234	0	0	0.223504	1.66655	1.30646	1.28057
MSTRG.3072	chr1:229313581-229313810	+	230	0.11767	0	0	1.00109	0.691922	3.82459
MSTRG.3076	chr1:229399311-229407067	-	7757	7.48451	3.01454	3.87042	0.915496	1.24505	1.76396
MSTRG.3077	chr1:229406879-229465431	+	58553	7.38379	7.37871	6.93546	7.16014	8.07671	6.07043
MSTRG.3078	chr1:229456758-229478588	-	21831	7.51579	5.23199	0.906972	6.63182	7.01561	3.25624
MSTRG.3079	chr1:229577526-229644073	-	66548	15.9166	14.4761	14.0768	12.9733	12.0293	12.761
MSTRG.3080	chr1:229652329-229692596	-	40268	9.60399	8.70267	6.17791	4.17263	4.66637	4.59487
MSTRG.3083	chr1:229799355-229805874	+	6520	1.45531	1.91178	1.94087	0.785043	0.722952	0.900001
MSTRG.3090	chr1:230737027-230744800	+	7774	0.137816	0	0.109165	31.9707	21.8832	39.2882
MSTRG.3091	chr1:230778267-230829723	+	51457	3.71118	3.57455	3.34239	5.19138	4.97374	4.8957
MSTRG.3093	chr1:231003988-231004266	+	279	0	0	0	0.177024	1.1415	0.810908
MSTRG.3094	chr1:231041989-231114542	-	72554	11.7832	9.87553	10.6891	11.1787	10.0388	9.76608
MSTRG.3099	chr1:231376967-231377166	-	200	0.234555	0.51181	0.226399	1.06774	0.686075	0
MSTRG.3100	chr1:231464299-231473598	-	9300	5.28922	5.44183	5.7898	7.29404	6.62294	9.69322
MSTRG.3101	chr1:231473794-231505555	+	31762	1.88154	1.87396	1.93692	2.60527	3.03142	3.06481
MSTRG.3102	chr1:231499497-231558481	-	58985	20.0137	20.0678	19.8877	18.0755	21.1104	18.6941
MSTRG.3103	chr1:231556855-231557502	+	648	0.593904	1.04001	0.705803	0.410164	2.01074	1.37299
MSTRG.3108	chr1:231658234-231664247	-	6014	2.44885	2.08241	1.80838	4.72025	4.37613	3.69878
MSTRG.3109	chr1:231664413-231702264	+	37852	4.99817	4.68593	4.67224	4.97533	4.76252	4.88205
MSTRG.3104	chr1:232256965-232257466	+	502	0.04277	0	0.051392	0.660351	0.381821	1.15905
MSTRG.3105	chr1:232258774-232259018	+	245	0.38653	0.768197	0.212227	0.676925	0.97642	2.01887
MSTRG.3106	chr1:232367571-232367795	-	225	0.068803	0	0.290945	1.15259	2.53217	6.25849
MSTRG.3107	chr1:232533714-232765865	-	232152	1.3032	1.13548	1.04877	5.30674	5.08699	5.40551
MSTRG.3115	chr1:233119181-233393898	-	274718	1.72401	1.63767	1.77496	1.61913	1.48838	2.21974
MSTRG.3116	chr1:233197795-233198689	-	895	0.773718	0.955938	1.60894	0.496125	0.386548	1.03973
MSTRG.3117	chr1:233395208-233395522	-	315	0	0	0	1.47797	1.33218	1.40252
MSTRG.3113	chr1:233463514-233520893	+	57380	6.50594	6.23236	6.28056	6.9844	6.80955	7.92656
MSTRG.3120	chr1:233749275-233808258	+	58984	32.3056	36.987	32.8944	46.2572	29.5311	38.2541
MSTRG.3121	chr1:233749328-233749858	-	531	0.145768	0.141343	0.097832	0.691846	1.0953	1.23291
MSTRG.3123	chr1:233819253-233824949	-	5697	0.833297	0.411154	0.510624	16.7596	12.7124	30.4003
MSTRG.3119	chr1:233833302-233843284	-	9983	0.075247	0.063194	0.072869	2.51065	1.51768	2.25046
MSTRG.3124	chr1:234040229-234460262	+	420034	4.1931	4.10725	4.16887	3.57828	2.75034	4.71837
MSTRG.3131	chr1:234492424-234506158	+	13735	2.10108	2.03861	1.67762	0.712521	0.419463	0.703961
MSTRG.3134	chr1:234508553-234519652	-	11100	2.95957	2.58865	2.93968	1.84446	0.994321	1.9621
MSTRG.3140	chr1:234527156-234614849	-	87694	8.0576	6.1099	6.75246	3.71015	3.24678	3.94932
MSTRG.3138	chr1:234745672-234745925	+	254	0.046883	0.594014	0	0.828856	0.325357	1.20266
MSTRG.3139	chr1:234745675-234745939	-	265	6.66966	2.94168	5.58165	4.17673	4.72191	4.61384
MSTRG.3141	chr1:235187161-235191462	-	4302	0.251683	0.257734	0.342561	1.00996	0.927011	1.669
MSTRG.3142	chr1:235272651-235291252	-	18602	86.9119	85.5421	88.3134	45.2031	47.982	46.8357
MSTRG.3143	chr1:235341171-235491532	-	150362	19.1061	17.3497	17.5216	20.0544	19.3887	18.7162
MSTRG.3147	chr1:235491905-235507847	+	15943	12.7895	13.5825	19.4389	21.5155	21.0214	24.3488
MSTRG.3154	chr1:235610559-235667781	-	57223	7.82466	7.52493	7.08454	6.28885	5.67284	6.2798
MSTRG.3159	chr1:235992105-236046916	-	54812	2.1158	1.94504	2.0914	3.83956	2.9074	4.19916
MSTRG.3155	chr1:236072359-236081389	+	9031	0.416754	0.306304	0.423704	1.33599	1.62591	1.98859
MSTRG.3165	chr1:236378855-236389795	-	10941	3.07523	3.16668	3.76983	5.73067	5.80343	5.91017
MSTRG.3170	chr1:236681582-236711580	+	29999	6.79906	7.07241	6.64055	4.58524	4.43301	4.59586
MSTRG.3172	chr1:236694835-236701218	-	6384	1.69061	1.25149	1.61757	2.65708	2.49395	3.17444
MSTRG.3167	chr1:237097939-237098209	-	271	0	0.269025	0.395821	4.38689	2.11881	4.05496
MSTRG.3178	chr1:237634419-237997115	+	362697	0.93499	1.26661	1.02048	0.188284	0.356603	0.243417
MSTRG.3182	chr1:241756904-241764480	-	7577	37.9606	39.2284	36.1565	30.1021	21.095	31.3104
MSTRG.3183	chr1:241803481-241803718	+	238	0	0	1.22115	0.188896	0	0.190923
MSTRG.3185	chr1:242011527-242053239	+	41713	19.5611	18.9068	15.1243	10.1673	10.0252	9.91293
MSTRG.3186	chr1:242060064-242089860	+	29797	0.253806	0.413914	0.232242	0.567454	0.43528	1.31546
MSTRG.3188	chr1:243287731-243364116	-	76386	7.51815	7.00212	7.29247	11.2875	6.55155	8.07228
MSTRG.3193	chr1:243419336-243663391	+	244056	4.26941	3.8713	3.66086	1.50923	1.28467	1.68881
MSTRG.3192	chr1:244212760-244220774	+	8015	1.26063	1.45943	1.68555	3.4726	3.27768	4.87
MSTRG.3200	chr1:244816428-244872335	+	55908	7.40165	5.97457	6.89687	5.79013	10.3619	10.7528
MSTRG.3215	chr1:244998624-245008897	+	10274	3.72825	2.6884	3.12241	9.32665	9.12007	9.50941
MSTRG.3217	chr1:245017375-245020156	+	2782	0.858737	0.719255	0.98106	1.34855	1.80986	0.997913
MSTRG.3216	chr1:245017508-245022676	-	5169	28.4048	26.774	25.4827	21.3033	19.0191	21.0273
MSTRG.3218	chr1:245022071-245027834	+	5764	3.50601	4.24177	3.05226	4.66096	5.50411	5.11511
MSTRG.3213	chr1:245251535-245254027	+	2493	3.14223	2.77979	3.39658	0.961866	0.625455	1.62181
MSTRG.3208	chr1:245293863-245297071	+	3209	0.47679	0.345881	0.4582	0.37037	0.286986	1.12453
MSTRG.3220	chr1:245912653-246670534	-	757882	2.22042	1.90196	1.79895	2.75288	2.63467	2.30287
MSTRG.3232	chr1:246887700-246890203	-	2504	0.629488	1.03423	0	0.779541	1.33837	0.621135
MSTRG.3234	chr1:247002414-247095280	-	92867	11.0297	12.6368	9.5379	9.73329	10.5834	10.0306
MSTRG.3241	chr1:247140167-247140662	-	496	1.44559	1.43673	0.313145	0.641499	0.32144	0.541589
MSTRG.3244	chr1:247261338-247261620	-	283	1.92604	0.604913	2.39006	1.89681	2.59578	2.5616
MSTRG.3249	chr1:247353154-247374158	-	21005	6.80189	6.47078	6.49312	6.24653	4.39202	10.086
MSTRG.3255	chr1:247460714-247495147	-	34434	4.67286	5.46647	5.46326	3.25756	5.05748	4.21157
MSTRG.3256	chr1:247495148-247499042	+	3895	3.10389	2.42613	2.51067	0.277544	0.371353	0.439392
MSTRG.3253	chr1:247506670-247507524	+	855	0.694062	0.610396	1.29811	0.081464	0.133814	0.46737
MSTRG.3254	chr1:247508229-247508733	+	505	1.29621	0.890569	0.640846	0.031973	0.143189	0.101699
MSTRG.3270	chr1:247857064-247858925	-	1862	0.861629	0.654169	0.933973	0.931013	0.548191	2.00715
MSTRG.3257	chr1:248881950-248894439	-	12490	3.47922	2.61745	2.99358	2.91405	2.88231	2.57479
MSTRG.3258	chr1:249104645-249120832	-	16188	5.8385	2.91505	6.12669	4.86774	8.83704	8.52316
MSTRG.3277	chr10:181009-199243	+	18235	5.61027	8.48306	6.7789	3.38984	2.79831	3.33262
MSTRG.3288	chr10:855482-977645	-	122164	4.02029	4.32015	4.12334	3.54503	3.15202	2.93114
MSTRG.3295	chr10:1034351-1068454	+	34104	19.0201	16.7377	16.2275	15.2681	16.8674	14.8164
MSTRG.3301	chr10:1096193-1102652	-	6460	2.3597	2.42047	2.14407	0.733502	0.579492	1.1273
MSTRG.3300	chr10:1102344-1178110	+	75767	1.78362	2.16838	2.31091	1.51212	1.36117	1.76142
MSTRG.3291	chr10:1401728-1404145	+	2418	1.71302	1.81381	1.54606	0.967793	1.34443	0.631183
MSTRG.3306	chr10:3109864-3178985	+	69122	25.4224	29.1187	24.8673	25.9089	28.0283	24.2417
MSTRG.3307	chr10:3160980-3172152	-	11173	0.7576	1.3561	0.614493	0.169637	0.650381	0.166614
MSTRG.3302	chr10:3509789-3510107	+	319	0.819555	0.42386	0.19751	0.960718	1.04908	0.81995
MSTRG.3303	chr10:3597385-3668457	-	71073	3.08466	2.83564	1.9381	3.08032	3.27427	3.09517
MSTRG.3309	chr10:5003430-5025475	+	22046	0.191474	0.256084	0.174873	18.0818	15.0761	15.9912
MSTRG.3311	chr10:5008215-5011110	-	2896	0	0	0	1.29955	1.05728	0.39819
MSTRG.3312	chr10:5029592-5060223	-	30632	0.102048	0.158636	0.0649444	2.4512	3.21182	2.66195
MSTRG.3318	chr10:5140992-5147816	-	6825	0.039701	0	0.095165	0.600546	1.23764	0.485871
MSTRG.3319	chr10:5636954-5639135	-	2182	2.0961	1.62317	2.47143	2.59454	1.6892	2.9452
MSTRG.3323	chr10:5726905-5805703	+	78799	10.5874	10.214	9.91669	10.2864	8.93838	10.586
MSTRG.3325	chr10:5805647-5807062	-	1416	1.69035	1.23561	1.07843	0.613749	0.413353	0.487015
MSTRG.3326	chr10:5807812-5855350	-	47539	50.203	50.454	52.6946	37.1539	35.0977	35.5156
MSTRG.3332	chr10:6146967-6154318	-	7352	0	0.682607	0	0.282194	1.16219	0.436598
MSTRG.3334	chr10:6263367-6277488	+	14122	2.27015	1.73334	4.06443	6.02703	6.88672	6.99416
MSTRG.3343	chr10:6912226-6913674	+	1449	0.817461	0.703256	1.12508	0.032556	0	0.118322
MSTRG.3344	chr10:7200603-7452920	-	252318	1.9147	1.43227	1.46455	1.30635	0.838111	1.30091
MSTRG.3350	chr10:7797798-7829944	-	32147	1.96407	1.65532	1.55772	2.09984	1.85929	2.1669
MSTRG.3349	chr10:8007474-8019250	-	11777	1.3684	1.10307	0.438443	0.415893	2.36124	1.92154
MSTRG.3352	chr10:10826406-10836877	-	10472	13.9675	11.4492	13.0604	21.2429	23.4143	22.2022
MSTRG.3356	chr10:11891296-11912874	+	21579	9.17515	7.83392	6.71901	6.59517	7.97055	6.24541
MSTRG.3358	chr10:11911688-11911999	-	312	0.163078	0.232494	0.822388	0.427715	1.21255	0.498112
MSTRG.3359	chr10:11914987-11916500	+	1514	1.08292	1.17531	1.25263	0.418544	0.260692	0.478694
MSTRG.3362	chr10:12071336-12077434	+	6099	0.830601	0.872	1.75565	1.45776	1.44301	0.890747
MSTRG.3363	chr10:12110971-12155028	+	44058	10.6677	10.5641	9.70277	5.2543	4.49616	4.84945
MSTRG.3371	chr10:12171701-12206546	+	34846	0.623345	0.595807	0.820048	1.72833	1.47525	1.40158
MSTRG.3366	chr10:12391520-12391788	-	269	0	0.287636	0	0.174189	0	1.43653
MSTRG.3380	chr10:13142225-13200472	+	58248	17.1798	19.0446	14.985	16.8598	15.4113	16.3233
MSTRG.3386	chr10:13206128-13253104	+	46977	5.61857	5.43733	5.1313	5.94041	4.44642	5.03662
MSTRG.3388	chr10:13360080-13390200	-	30121	15.4191	15.872	14.3666	13.4398	14.1123	13.904
MSTRG.3394	chr10:13628968-13672868	+	43901	1.40238	1.06435	1.18885	1.19987	1.09227	1.24298
MSTRG.3409	chr10:14906510-14920685	-	14176	1.44516	0.978119	0.801034	0.0768606	0.0567353	0.120998
MSTRG.3410	chr10:14921207-14939509	+	18303	4.06222	4.6943	4.96116	3.92127	3.99804	4.60951
MSTRG.3412	chr10:14950278-14955716	+	5439	1.13474	1.10983	1.11749	0.814464	0.517818	1.27194
MSTRG.3393	chr10:15117475-15130775	-	13301	3.7628	2.87425	3.27771	3.23266	3.37956	3.90963
MSTRG.3420	chr10:16478983-16555736	+	76754	11.154	10.3376	9.18446	3.61976	3.24008	3.60229
MSTRG.3423	chr10:16557479-16559858	+	2380	1.36374	1.12201	1.0351	0.443773	0.1715	0.468482
MSTRG.3426	chr10:17256327-17279592	-	23266	1.65064	1.86658	1.77645	1.43012	1.36855	1.67398
MSTRG.3438	chr10:18801544-18944123	-	142580	2.47313	2.67485	2.88457	1.96588	1.57088	2.82624
MSTRG.3440	chr10:18948334-18970566	+	22233	14.2876	14.0717	14.452	12.3402	11.9431	11.9196
MSTRG.3435	chr10:20408816-20409111	-	296	0.115327	0.060015	0.084248	0.325796	0.465305	1.27439
MSTRG.3458	chr10:21802144-21807190	-	5047	1.32081	1.52393	1.25256	5.839	6.77096	4.189
MSTRG.3459	chr10:21823397-22032555	+	209159	8.19155	8.08217	7.56417	6.50701	6.30375	6.90189
MSTRG.3469	chr10:22605381-22609235	+	3855	11.5433	10.2376	11.1638	11.3894	11.4848	10.5097
MSTRG.3465	chr10:22823787-23003484	-	179698	4.10836	3.37922	4.50068	6.04664	6.86805	7.16261
MSTRG.3464	chr10:23427276-23427535	+	260	0.883396	0.729102	1.17688	1.61547	1.01989	1.35628
MSTRG.3468	chr10:23727992-23731090	+	3099	11.6516	11.3875	10.087	26.4004	23.2469	25.0082
MSTRG.3470	chr10:24755460-24836772	+	81313	2.76709	2.46437	3.36906	4.2615	3.77394	4.32596
MSTRG.3481	chr10:24873316-25010856	-	137541	9.26335	5.43416	7.77706	8.52761	5.11503	8.26996
MSTRG.3487	chr10:27035528-27112219	-	76692	16.2341	15.7552	15.6263	17.8897	18.6665	16.8699
MSTRG.3493	chr10:27443109-27443313	+	205	0.866928	1.3465	0.943435	0.25328	1.39953	1.29455
MSTRG.3494	chr10:27452056-27475647	+	23592	11.7841	11.2025	10.2756	9.97735	9.40244	9.93135
MSTRG.3495	chr10:27484146-27529744	-	45599	17.3841	16.4965	15.2737	16.635	17.0043	16.5982
MSTRG.3498	chr10:27754583-27759814	+	5232	0	0	0	5.88344	5.66176	7.31534
MSTRG.3502	chr10:28339957-28591995	-	252039	0.88122	2.15866	1.65579	2.47668	2.8806	2.63359
MSTRG.3511	chr10:28781189-28811050	-	29862	0.934872	0.814789	1.05853	0.73271	0.682802	0.963845
MSTRG.3512	chr10:28811336-28821936	-	10601	6.73786	5.24282	5.82271	3.10632	2.52318	3.77753
MSTRG.3513	chr10:28821713-28908889	+	87177	17.8565	17.572	17.4683	16.717	15.8791	16.1775
MSTRG.3514	chr10:28822018-28872434	-	50417	0.932549	1.128	1.10877	1.2733	0.661836	0.982857
MSTRG.3506	chr10:29217760-29222962	+	5203	1.25052	0.518993	1.34595	1.01463	1.47241	0.619656
MSTRG.3507	chr10:29431600-29432016	+	417	0.064902	0.129885	0	0.467308	1.0769	0.444112
MSTRG.3519	chr10:29712209-29716628	+	4420	1.83831	1.49691	1.86186	0.779109	0.680743	1.27964
MSTRG.3521	chr10:29747851-29750412	+	2562	1.22277	0.89092	1.14725	0.747879	0.56275	0.585362
MSTRG.3526	chr10:29987155-29987479	+	325	24.6756	27.9553	22.3674	25.1109	34.8838	28.9141
MSTRG.3515	chr10:30597952-30638248	-	40297	3.17511	2.99156	1.90948	2.04631	1.02572	2.22724
MSTRG.3536	chr10:31644073-31757198	+	113126	6.09538	1.64278	4.82245	2.04416	3.52213	2.26093
MSTRG.3538	chr10:31815953-31816203	-	251	1.12569	0.253547	0.313248	0.170283	0	0.733264
MSTRG.3545	chr10:32560482-32667726	-	107245	2.4466	2.06237	2.30853	1.64713	1.67745	1.86765
MSTRG.3553	chr10:33269799-33371030	+	101232	3.36022	2.4778	2.66189	0.837512	1.0494	1.21859
MSTRG.3561	chr10:34558715-35104249	-	545535	7.17765	6.24481	6.18198	6.82047	6.56226	6.87679
MSTRG.3566	chr10:35297523-35379274	-	81752	12.7533	11.4472	11.3242	14.575	13.157	13.1479
MSTRG.3583	chr10:35415851-35495934	+	80084	1.46425	1.73693	1.79781	5.78276	5.497	4.15622
MSTRG.3584	chr10:35417050-35417450	+	401	0.490886	0.396518	1.28279	0.407396	0.184214	0.594193
MSTRG.3572	chr10:35603500-35608175	-	4676	2.04512	1.84674	1.75843	0.843671	0.510709	1.46199
MSTRG.3573	chr10:35611353-35623956	-	12604	1.36927	1.07876	1.30214	0.40611	0.165905	0.890579
MSTRG.3574	chr10:35625429-35625739	+	311	1.55944	1.26386	1.36118	3.0162	3.08907	2.96083
MSTRG.3569	chr10:36799334-36813162	-	13829	1.52195	4.53997	5.2344	7.9625	1.16799	0.809737
MSTRG.3578	chr10:38089118-38089653	-	536	1.14719	0.945884	1.41745	0.98849	0.62945	0.403573
MSTRG.3575	chr10:38117948-38146486	-	28539	2.06986	1.47268	2.12323	1.22753	0.742236	1.68977
MSTRG.3588	chr10:38299598-38357858	+	58261	4.61809	4.34056	4.00022	2.69117	1.96041	2.89116
MSTRG.3593	chr10:38383264-38412276	+	29013	3.95326	3.71287	3.65252	3.8614	2.55404	4.38564
MSTRG.3592	chr10:38682227-38682460	-	234	1.37042	1.21682	0.59626	0.202949	0	0.709432
MSTRG.3596	chr10:43008600-43048301	-	39702	5.73819	5.44604	5.75839	2.42158	1.63323	4.40872
MSTRG.3604	chr10:43278249-43326877	+	48629	17.9466	15.811	15.0513	15.0085	14.2264	15.1543
MSTRG.3608	chr10:43633934-43680750	+	46817	14.9609	12.9627	12.8749	21.7967	18.5563	21.0028
MSTRG.3609	chr10:43689983-43699267	-	9285	6.90364	5.88311	7.28921	11.8976	13.0587	12.1874
MSTRG.3611	chr10:43881065-43904614	-	23550	131.838	143.238	142.75	115.998	119.871	106.804
MSTRG.3612	chr10:43882001-43883381	+	1381	0.599941	1.02012	0.877769	0.65349	1.20332	0.539864
MSTRG.3613	chr10:43892750-43893414	+	665	1.13384	0.395015	1.11794	0.142827	0.165891	0.612962
MSTRG.3610	chr10:43926636-43927399	-	764	1.05516	1.30341	1.13893	0.128049	0.149497	0.084466
MSTRG.3616	chr10:44047665-44048097	-	433	1.39424	0.325222	1.02667	0.173289	0.13414	1.00444
MSTRG.3623	chr10:44139308-44143239	-	3932	9.54287	8.7096	8.30354	9.71332	10.383	8.64837
MSTRG.3630	chr10:45505148-45505654	-	507	0.651244	1.14688	0.319505	1.32916	0.500532	2.60344
MSTRG.3645	chr10:45919532-45941563	+	22032	4.76997	4.67643	4.62129	3.43742	2.67893	4.69894
MSTRG.3648	chr10:45950041-46089939	-	139899	4.55327	4.54586	4.14405	5.76607	5.76996	5.33238
MSTRG.3647	chr10:46108934-46109169	-	236	0.829503	0.654893	0.568153	1.00413	0.8457	1.27497
MSTRG.3661	chr10:46222712-46288384	+	65673	20.6707	19.2237	19.9482	12.4329	10.7195	13.7272
MSTRG.3654	chr10:46356577-46357760	-	1184	1.12342	0.862236	1.02547	0.520069	0.541456	0.752188
MSTRG.3656	chr10:46733591-46735472	-	1882	1.21825	1.11478	0.850174	0.321757	0.178267	0.852189
MSTRG.3649	chr10:46762548-46763167	+	620	1.22033	0.977784	0.640586	0.653329	0.141937	0.520418
MSTRG.3650	chr10:46764543-46766176	+	1634	1.11128	0.638729	0.64181	0.160315	0.064094	0.306294
MSTRG.3670	chr10:46898405-46898710	+	306	1.34289	1.70458	1.15951	1.76644	1.78052	1.72607
MSTRG.3673	chr10:46914151-47397566	+	483416	1.51801	1.64695	1.46353	0.664851	0.696275	0.730188
MSTRG.3675	chr10:46951553-46959797	+	8245	2.53321	2.99108	2.58338	1.04521	0.676159	1.80931
MSTRG.3677	chr10:46970932-46972892	+	1961	4.06673	4.88836	5.88315	1.66123	1.49933	2.8653
MSTRG.3678	chr10:46993495-47007880	+	14386	2.59251	3.16328	2.71668	2.65812	2.78131	3.32245
MSTRG.3679	chr10:47089949-47173994	-	84046	18.9684	5.2371	5.04045	3.43083	3.4274	3.39393
MSTRG.3684	chr10:47189116-47191029	-	1914	2.96507	2.97786	3.24008	1.59377	1.24719	2.73708
MSTRG.3686	chr10:47213991-47215192	-	1202	1.64038	1.3097	1.60145	0.644055	0.281632	1.76475
MSTRG.3692	chr10:47370119-47421158	+	51040	1.26467	1.08096	1.05814	0.571094	0.688892	0.549618
MSTRG.3663	chr10:47655234-47655792	+	559	0.276934	0.359188	1.17891	0.305429	0.694205	0.421464
MSTRG.3666	chr10:47706089-47706319	+	231	0.14897	0.450544	1.38229	0.290978	0.126563	0.734592
MSTRG.3662	chr10:47732113-47732719	+	607	1.77658	1.6252	1.07364	0.508581	0.809163	1.22594
MSTRG.3668	chr10:47742396-47770871	+	28476	30.8188	29.0437	29.5643	11.1716	10.6415	13.3611
MSTRG.3694	chr10:48161239-48215354	+	54116	0	1.31476	1.66008	0.683629	0.37465	1.75923
MSTRG.3699	chr10:48210280-48240435	+	30156	2.07725	1.85237	2.07515	1.07146	0.723632	1.85828
MSTRG.3702	chr10:48255300-48279171	+	23872	13.2063	19.4288	13.4125	5.35211	7.18878	5.7928
MSTRG.3706	chr10:48901140-48942646	-	41507	1.52679	1.7973	1.86694	0.757665	0.570189	1.48924
MSTRG.3704	chr10:49195537-49199986	-	4450	19.6308	22.6194	26.1119	9.42117	9.17281	11.0195
MSTRG.3705	chr10:49214614-49217161	-	2548	1.10082	1.23569	1.13826	0.674441	0.697327	1.17094
MSTRG.3708	chr10:49217697-49226523	-	8827	2.54032	2.24974	2.14671	1.30557	1.02905	2.63266
MSTRG.3709	chr10:49239675-49246633	-	6959	1.27796	1.18023	1.62338	0.534627	0.386333	1.511
MSTRG.3711	chr10:49250260-49251014	-	755	0.766712	0.909522	1.11156	0.469456	0.169802	1.22955
MSTRG.3714	chr10:49514698-49647403	+	132706	7.37947	6.8818	8.15679	5.76331	5.47622	6.47616
MSTRG.3713	chr10:50572226-50603840	-	31615	3.76816	3.34673	3.72505	4.95022	5.34376	4.84734
MSTRG.3717	chr10:50638609-50655742	-	17134	2.049	1.95427	2.16228	1.37044	0.973844	1.61911
MSTRG.3718	chr10:50691414-50747072	-	55659	4.59118	3.29748	4.43712	3.06788	2.52283	3.35424
MSTRG.3715	chr10:50788092-50788413	+	322	0.168099	0	0	1.02551	1.05383	0.771398
MSTRG.3719	chr10:51026325-51130714	-	104390	14.0697	13.3849	13.8941	11.645	11.1977	12.5109
MSTRG.3727	chr10:51224670-51486201	-	261532	2.68825	2.44688	2.53572	1.80925	1.57411	2.50555
MSTRG.3730	chr10:51371417-51770185	+	398769	9.22279	8.12807	8.86602	6.09612	6.27584	8.24353
MSTRG.3735	chr10:51572836-51590731	+	17896	77.0725	48.7455	70.7969	72.3711	42.775	71.0925
MSTRG.3736	chr10:51585475-51591885	-	6411	2.274	2.07141	2.3163	2.19188	2.16354	2.16408
MSTRG.3739	chr10:51623391-51707661	+	84271	5.77301	5.31016	5.39225	4.44416	3.93552	4.46544
MSTRG.3722	chr10:51771980-51772796	+	817	1.14923	1.21735	1.43284	0.656196	0.394675	0.92558
MSTRG.3726	chr10:51827721-51893266	+	65546	20.8856	19.9589	20.2373	14.5378	12.9751	16.6665
MSTRG.3742	chr10:52065360-52383737	-	318378	8.80404	3.82236	3.68882	12.0101	3.46708	11.7431
MSTRG.3762	chr10:53455247-53459351	-	4105	19.3738	16.3496	18.8557	14.5411	13.9797	14.9157
MSTRG.3752	chr10:54293972-54339877	+	45906	1.03542	0.819468	1.51457	1.03076	1.06699	2.07016
MSTRG.3751	chr10:55261074-55261362	-	289	0	0	0.01503	0.724675	0.293238	3.01654
MSTRG.3765	chr10:57600108-57659836	-	59729	3.21693	1.95487	2.78271	2.50637	1.7701	1.32949
MSTRG.3767	chr10:57731541-57736478	+	4938	0	0	0	4.71131	3.36775	7.88107
MSTRG.3766	chr10:58113300-58114718	-	1419	0.882933	1.54585	1.15369	0.639113	0.479371	0.911693
MSTRG.3768	chr10:58117904-58120142	-	2239	36.2677	38.9763	32.8592	34.8003	32.3725	35.6851
MSTRG.3769	chr10:58118577-58119822	+	1246	0.58774	0.379617	0.571701	1.50372	0.903883	0.963205
MSTRG.3770	chr10:59951278-60029481	-	78204	12.8767	13.2403	13.2159	18.8453	17.9617	19.6964
MSTRG.3773	chr10:60028938-60052514	+	23577	17.2726	15.9887	16.207	18.8997	20.7026	17.8026
MSTRG.3775	chr10:60094738-60124554	-	29817	0.661834	0.4745	0	0.398235	1.86124	1.19819
MSTRG.3776	chr10:60145194-60161422	+	16229	16.149	16.2762	13.3344	18.9512	17.993	15.0085
MSTRG.3777	chr10:60553295-60591197	+	37903	26.048	29.2279	26.201	20.3029	18.2496	19.611
MSTRG.3781	chr10:62538254-62554601	+	16348	56.2973	56.2757	56.0486	73.8959	70.4741	68.746
MSTRG.3780	chr10:62560183-62560437	+	255	0.267456	1.11737	0.655211	1.09755	0.452491	0.982316
MSTRG.3782	chr10:62630936-62704062	-	73127	4.79912	3.97369	4.25057	1.86027	1.62219	1.87762
MSTRG.3786	chr10:64004012-64028466	-	24455	0.945016	1.52814	0.964356	1.40554	1.59931	1.41728
MSTRG.3803	chr10:64926981-65281610	-	354630	20.8522	18.8874	19.7915	17.542	10.9495	17.1893
MSTRG.3811	chr10:65358996-65380716	-	21721	0	0	0.475591	1.22797	0.512134	0.718906
MSTRG.3796	chr10:69524864-69525241	+	378	0.35608	0.212881	0.539509	0.37523	1.26948	0.210116
MSTRG.3797	chr10:69533213-69609939	-	76727	18.3492	15.2022	16.5266	28.8691	31.2716	31.886
MSTRG.3812	chr10:69644427-69678143	+	33717	34.9396	31.9544	31.9329	25.1011	26.931	24.7284
MSTRG.3819	chr10:69864819-69971774	+	106956	6.1616	8.14875	6.3355	2.93969	2.67043	2.95621
MSTRG.3820	chr10:69887130-69889502	+	2373	1.90569	2.44937	1.66251	0.59511	0.510061	1.03209
MSTRG.3818	chr10:69972454-69983337	+	10884	1.49808	1.96897	1.62363	0.287643	0.268562	0.35969
MSTRG.3824	chr10:70091874-70102026	+	10153	57.1953	52.717	55.9475	71.0034	63.9932	75.8903
MSTRG.3825	chr10:70097059-70098290	-	1232	1.15938	0.668405	0.895611	1.1947	1.11638	0.635149
MSTRG.3826	chr10:70103163-70167033	-	63871	5.52795	3.64055	4.68745	3.29532	3.54685	4.80595
MSTRG.3831	chr10:70173822-70287231	-	113410	5.91132	5.31825	5.23133	4.5438	3.85648	5.46328
MSTRG.3822	chr10:70303794-70303993	-	200	0.849809	1.33954	0.625198	0.227161	0.456084	0.541266
MSTRG.3829	chr10:70392380-70392587	-	208	2.54506	1.40148	1.86936	0.774758	0	1.09505
MSTRG.3838	chr10:70480999-70552132	+	71134	51.2054	46.8344	46.2504	55.6637	48.0437	59.2426
MSTRG.3841	chr10:70520794-70545973	-	25180	1.18236	1.13758	0.935716	1.26458	1.00523	1.45575
MSTRG.3845	chr10:70715926-70723108	-	7183	1.13109	1.27551	1.15541	0.841502	1.17912	0.877717
MSTRG.3847	chr10:70738637-70742944	-	4308	1.03373	1.40124	1.47828	0.788886	0.857454	0.731668
MSTRG.3855	chr10:70973555-71027315	+	53761	42.0557	45.2318	42.8847	40.5366	41.6619	39.9394
MSTRG.3861	chr10:71211228-71211437	-	210	0	0.718474	0.357692	0.943017	2.63868	2.20561
MSTRG.3862	chr10:71211233-71272657	+	61425	14.1624	16.2019	15.6842	24.9131	23.7986	24.5089
MSTRG.3863	chr10:71390014-71393355	+	3342	8.89465	8.20354	9.71238	19.2334	21.9111	20.6414
MSTRG.3867	chr10:71911906-71930268	-	18363	10.0082	9.17819	9.15708	17.5325	19.6645	32.8172
MSTRG.3869	chr10:71954497-71993667	-	39171	78.2254	77.4898	74.4798	63.3708	65.338	62.8614
MSTRG.3871	chr10:71969410-71977626	+	8217	1.51194	0.77057	0.899956	1.14184	1.76311	0.460927
MSTRG.3874	chr10:72058732-72136697	-	77966	4.18611	4.61558	4.81466	4.5176	3.87317	3.77486
MSTRG.3872	chr10:72163969-72164221	-	253	0.414339	0	0.875433	0.381047	1.46913	0.334303
MSTRG.3876	chr10:72582605-72583600	-	996	1.34441	1.24616	1.10879	1.13703	0.885107	1.19308
MSTRG.3881	chr10:73079039-73123142	+	44104	2.79339	3.85875	3.7405	3.44841	3.54079	4.60615
MSTRG.3890	chr10:73576722-73611049	+	34328	0.664313	0.805464	1.00547	1.52754	2.0339	1.36066
MSTRG.3883	chr10:73648315-73648883	-	569	2.20285	1.59984	1.04623	0.640156	0.773464	0.593907
MSTRG.3888	chr10:73724123-73773322	+	49200	13.2251	13.1523	13.8012	17.9623	18.0813	16.7885
MSTRG.3892	chr10:73780486-73788692	+	8207	0.506167	1.92291	0.70808	0.451225	0.385273	2.70968
MSTRG.3894	chr10:73818793-73823545	-	4753	1.9105	2.29466	2.03183	3.42845	3.19812	4.263
MSTRG.3893	chr10:73851888-73855453	-	3566	2.06826	2.15958	1.99412	4.39485	4.11869	3.56527
MSTRG.3900	chr10:73856280-73976069	-	119790	12.8362	13.4576	12.9411	18.9787	18.0878	15.9507
MSTRG.3901	chr10:73909683-73995616	+	85934	29.566	29.4658	26.6413	17.8014	16.1541	18.0342
MSTRG.3895	chr10:74031641-74032533	-	893	0.48107	1.04797	0.57859	0.226017	0.102365	0.94093
MSTRG.3896	chr10:74032858-74033362	+	505	1.17474	1.02272	0.472641	0.54543	1.03668	1.1444
MSTRG.3897	chr10:74061369-74061885	+	517	0.608285	0.30568	0	0.91612	0.999042	1.544
MSTRG.3905	chr10:74092589-74114871	-	22283	9.62733	9.39904	9.28542	5.83996	5.42299	5.10024
MSTRG.3925	chr10:74868715-74927817	-	59103	18.644	15.8577	15.816	17.0874	18.2654	20.8563
MSTRG.3927	chr10:74872109-74876501	-	4393	0.949735	0.822177	0.973516	0.752439	0.585787	1.78532
MSTRG.3930	chr10:74937630-74995067	+	57438	1.66166	1.89846	1.8592	0.772554	0.54043	0.69026
MSTRG.3931	chr10:74940807-74986768	-	45962	0.878378	0.423001	0.452295	0.162829	0.015527	1.03745
MSTRG.3935	chr10:74991072-74997445	-	6374	1.66488	1.39383	1.43194	0.774907	0.593315	1.60993
MSTRG.3932	chr10:74998069-75012451	-	14383	27.841	27.6441	27.2378	21.8499	22.7344	23.3967
MSTRG.3937	chr10:75011806-75012173	+	368	1.34486	0.460986	0.795963	0.01259	0.128173	0.284309
MSTRG.3938	chr10:75012549-75014107	+	1559	14.2973	9.96566	9.47217	3.39831	2.89454	3.59119
MSTRG.3941	chr10:75039204-75042385	-	3182	1.07604	1.11253	1.20988	0.161235	0.118464	0.363545
MSTRG.3942	chr10:75048352-75048990	-	639	0.798225	0.616027	1.24692	0.03716	0	0.15238
MSTRG.3946	chr10:75196564-75255754	-	59191	14.2987	15.3277	13.7483	9.42541	9.60301	9.41071
MSTRG.3948	chr10:75257296-75385741	-	128446	4.86532	5.90917	5.59667	4.1279	4.29227	5.32007
MSTRG.3954	chr10:75428398-75428620	-	223	1.57489	1.14977	1.06831	0.114187	0.893253	0.595028
MSTRG.3955	chr10:75430484-75433731	-	3248	1.71206	1.74302	2.45858	1.16847	1.31235	2.15326
MSTRG.3956	chr10:75434136-75490245	-	56110	1.99245	1.84493	1.93798	1.22406	0.88613	1.91478
MSTRG.3959	chr10:75490320-75499541	+	9222	2.00575	1.87929	1.88787	1.92772	1.7414	2.46609
MSTRG.3962	chr10:75502753-75504546	-	1794	10.7048	18.9091	20.564	3.68863	2.8965	3.90431
MSTRG.3963	chr10:75506625-75531917	+	25293	23.6021	34.0659	37.9266	31.9608	31.5945	41.8856
MSTRG.3965	chr10:75532049-75540009	+	7961	3.55728	4.03856	3.04067	5.56627	5.53813	5.67451
MSTRG.3967	chr10:75539972-75541758	-	1787	2.9474	2.46811	3.05848	0.997902	0.512519	1.57525
MSTRG.3969	chr10:75551808-75561190	+	9383	4.25116	3.86378	4.42083	4.99306	4.74036	4.84023
MSTRG.3970	chr10:75556304-75563102	-	6799	2.30199	2.15687	2.58565	1.98287	1.75793	1.75175
MSTRG.3973	chr10:75574020-75634260	-	60241	9.19846	8.58608	9.58957	15.9226	15.4949	18.0311
MSTRG.3971	chr10:75668935-75673511	+	4577	10.9176	10.017	10.9091	9.58868	9.16824	8.15866
MSTRG.3991	chr10:76871393-76941881	+	70489	12.5821	12.3538	11.719	14.4395	13.2497	16.8069
MSTRG.4000	chr10:77159510-77159828	+	319	0.338229	0.527551	0.16505	0.94732	1.02708	1.56269
MSTRG.4005	chr10:77185865-77187092	-	1228	1.13957	0.728218	0.983416	0.108541	0.047616	0.174287
MSTRG.4004	chr10:78582557-78583426	+	870	0	0	0	0.573435	0.875126	1.68291
MSTRG.4019	chr10:79537791-79538856	-	1066	1.17836	0.927074	0.670731	0.177011	0.163459	0.663931
MSTRG.4022	chr10:79565863-79686284	-	120422	10.21	9.83272	9.36097	5.61453	4.27114	5.88032
MSTRG.4025	chr10:79685387-79689582	+	4196	0.241949	0.219742	0.213018	1.02767	1.20031	1.17546
MSTRG.4028	chr10:79793609-79800455	-	6847	12.5688	15.9771	14.3282	14.3208	18.8845	10.2954
MSTRG.4029	chr10:80702751-80737773	-	35023	1.43603	1.4663	1.63962	0.540216	0.365764	0.688528
MSTRG.4034	chr10:80864915-81076276	+	211362	7.64314	7.51477	7.67103	9.47575	9.79578	6.3188
MSTRG.4038	chr10:81436663-81439902	-	3240	2.01664	1.72886	2.38698	0.6311	0.450914	1.13021
MSTRG.4036	chr10:81444250-81586240	-	141991	1.49838	1.62654	1.87943	1.27886	1.21599	1.55884
MSTRG.4045	chr10:81839051-81851088	+	12038	4.62773	4.67979	5.13217	1.46725	1.87345	1.97901
MSTRG.4043	chr10:81903224-81909845	-	6622	0.925483	1.17688	1.25582	1.08936	0.684119	1.9811
MSTRG.4052	chr10:81915396-81965278	-	49883	10.6315	12.0095	11.2878	17.8472	20.6736	17.011
MSTRG.4053	chr10:81921704-81923365	+	1662	0.364226	0.761087	0	0.068054	1.64852	0.626298
MSTRG.4050	chr10:82006327-82006910	-	584	2.00063	1.77849	2.13525	2.56264	2.18765	1.2714
MSTRG.4057	chr10:82294205-82295344	+	1140	0.146826	0.162384	0.288759	0.569903	0.643491	1.22511
MSTRG.4059	chr10:85899262-85913001	+	13740	57.2855	58.1856	56.3607	51.7994	55.6544	48.091
MSTRG.4066	chr10:88281763-88284788	+	3026	1.24698	0.492923	0.656717	0.292841	0.290108	0.288893
MSTRG.4069	chr10:88516407-88689495	+	173089	4.76068	4.01793	3.85999	6.08484	6.01431	6.23607
MSTRG.4074	chr10:88718413-88722922	+	4510	3.18866	3.71908	2.82865	8.528	8.60302	7.68225
MSTRG.4067	chr10:88801377-88801808	-	432	0.19588	0.257914	0.473289	1.09125	0.265742	0.262961
MSTRG.4077	chr10:88817475-88854623	-	37149	38.1512	38.0707	43.3429	44.1486	46.4985	38.6326
MSTRG.4078	chr10:88853918-88951220	+	97303	12.6652	13.4061	12.1049	15.1304	15.0866	13.541
MSTRG.4084	chr10:88968149-88968409	+	261	0.595892	0.538061	1.3778	0.247458	0.112016	0.109726
MSTRG.4086	chr10:89078778-89079164	+	387	1.36019	1.14962	1.31967	0.365277	0.228148	0.399605
MSTRG.4081	chr10:89196086-89209737	+	13652	0.873664	1.32738	1.09188	0.806331	0	1.23674
MSTRG.4091	chr10:89457727-89507462	+	49736	25.1798	28.2941	27.5142	15.6123	15.1275	13.9404
MSTRG.4092	chr10:89512874-89578023	-	65150	21.1351	20.4625	21.2587	17.3896	17.6663	16.5763
MSTRG.4096	chr10:89622870-89734624	+	111755	10.4863	10.807	11.4145	8.33416	11.6931	11.0755
MSTRG.4100	chr10:90342753-90344229	+	1477	1.20777	0.672636	0.843056	0.570074	0.371076	0.899547
MSTRG.4112	chr10:91044758-91051882	+	7125	7.78839	7.95355	7.31441	14.1467	13.172	14.659
MSTRG.4113	chr10:91087421-91100728	+	13308	14.8421	15.0088	16.2568	13.9213	10.9578	14.9637
MSTRG.4117	chr10:91165173-91167678	-	2506	1.16442	1.10149	0.630508	0.416091	0.321605	0.388245
MSTRG.4106	chr10:91393975-91403713	-	9739	2.15329	2.17551	2.07215	2.19048	1.94448	2.02568
MSTRG.4119	chr10:91461374-91534694	+	73321	30.4627	26.4345	28.8566	25.6351	11.6588	25.5528
MSTRG.4120	chr10:91841463-91841936	-	474	0.732923	0.760302	0.301823	1.41961	1.2386	2.66744
MSTRG.4122	chr10:91844236-91844492	-	257	0.164748	0.100857	0.237353	0.570567	0.353311	1.61669
MSTRG.4121	chr10:92054866-92055283	+	418	0.203872	0.348249	0.254144	0.852964	0.69664	1.6623
MSTRG.4123	chr10:92057824-92058562	+	739	0.172247	0.089873	0.134275	0.567086	0.584538	1.39916
MSTRG.4127	chr10:92922720-93044086	+	121367	11.0603	11.0756	10.9883	8.26711	7.50824	7.6434
MSTRG.4133	chr10:93558156-93625033	+	66878	17.7883	18.4868	20.2284	21.2459	20.6759	19.539
MSTRG.4134	chr10:93566002-93567289	-	1288	12.2271	11.5448	10.2553	8.80838	9.91285	8.71552
MSTRG.4135	chr10:93683536-93790082	+	106547	16.3164	16.0999	17.3386	10.8021	8.90774	12.1733
MSTRG.4149	chr10:94211441-94333833	-	122393	8.7919	9.15922	8.44452	9.64922	8.39661	8.92703
MSTRG.4155	chr10:95066187-95089530	-	23344	65.1753	70.2301	64.9937	25.1726	22.2912	23.0264
MSTRG.4156	chr10:95069874-95072941	+	3068	1.37478	1.33091	1.12946	0.145675	0	0.345535
MSTRG.4153	chr10:95256389-95288849	+	32461	34.2151	34.2238	32.6423	47.5234	42.9677	42.4406
MSTRG.4161	chr10:95429381-95462329	-	32949	5.37806	4.40357	4.70322	4.5486	4.15876	4.46063
MSTRG.4170	chr10:96074871-96122696	-	47826	16.5698	15.7107	16.6113	11.7714	12.1166	10.8452
MSTRG.4176	chr10:96248392-96248729	-	338	1.23736	1.81646	0.481335	0.279133	0	1.24947
MSTRG.4177	chr10:96305547-96373662	+	68116	5.49397	4.53151	6.32525	4.6789	4.46874	5.44839
MSTRG.4172	chr10:96489856-96490077	-	222	0.12191	0.602089	0.266417	1.31418	0.22388	0.430006
MSTRG.4174	chr10:96997697-97050769	-	53073	31.0942	36.1638	31.0413	30.3432	36.3762	29.1939
MSTRG.4180	chr10:97423453-97453658	-	30206	6.13641	7.3461	6.40909	4.58179	5.47636	5.41157
MSTRG.4188	chr10:98336568-98346795	+	10228	0.502299	1.15942	0.439841	0.698671	1.10628	0.804939
MSTRG.4185	chr10:98510454-98510706	-	253	0.522037	0.230593	0.272769	0.47902	1.14004	0.151053
MSTRG.4195	chr10:98667042-98724189	+	57148	0.955774	2.86389	2.82846	1.2927	1.09212	1.67168
MSTRG.4199	chr10:99092254-99094466	-	2213	13.4365	13.5523	13.0863	19.6459	24.5853	23.7703
MSTRG.4205	chr10:99125876-99126363	+	488	0.453028	0.31258	1.23361	0.285055	0	0
MSTRG.4219	chr10:99227397-99230915	+	3519	1.01837	1.17012	0.852029	0.275035	0.26608	0.474809
MSTRG.4211	chr10:99437516-99439510	+	1995	1.33166	0.292559	1.0098	0.826547	1.17914	1.01113
MSTRG.4222	chr10:99496940-99520652	+	23713	5.81264	6.67442	5.78396	3.0749	2.98796	4.35998
MSTRG.4223	chr10:99894381-100004651	+	110271	6.83407	5.35459	5.44716	7.17682	6.59358	6.87809
MSTRG.4224	chr10:100007456-100027419	-	19964	1.72967	2.33574	1.94722	0.577054	0.524796	0.455866
MSTRG.4226	chr10:100162176-100174915	-	12740	1.70823	1.48339	1.46512	0.615578	0.321947	0.664723
MSTRG.4232	chr10:100202145-100206619	-	4475	5.76544	6.42368	5.88151	3.80858	4.13544	3.63737
MSTRG.4228	chr10:100655384-100655607	+	224	2.8312	1.3216	1.56968	0.569447	0.259297	1.08545
MSTRG.4234	chr10:101370279-101379926	-	9648	8.94327	9.76029	9.53602	5.44507	7.01977	6.92431
MSTRG.4235	chr10:101419263-101480266	+	61004	5.24366	4.70294	5.00201	4.92859	4.91469	4.87437
MSTRG.4236	chr10:101455257-101456377	-	1121	0.728466	1.03827	1.4596	0.883713	1.05643	1.19893
MSTRG.4238	chr10:101468693-101470389	-	1697	1.22556	0.833584	1.44612	0.35326	0.461944	0.496826
MSTRG.4239	chr10:101471601-101491857	-	20257	10.0715	10.706	11.0162	9.1729	8.22658	8.30018
MSTRG.4240	chr10:101542383-101611949	+	69567	3.34088	4.7796	3.7097	8.0124	6.30218	11.4027
MSTRG.4242	chr10:101646161-101769676	-	123516	5.68737	5.22273	5.52264	6.18404	5.44544	5.81013
MSTRG.4244	chr10:101909851-101953180	-	43330	8.59597	8.42227	8.24813	10.21	10.1559	9.13538
MSTRG.4245	chr10:101945856-101947533	+	1678	1.21008	0.603823	1.24902	0.159527	0.259025	0.095348
MSTRG.4248	chr10:101992866-102027380	-	34515	9.53491	9.26104	8.26657	5.33376	6.1661	5.59612
MSTRG.4254	chr10:102133372-102148117	+	14746	1.22858	1.39913	1.04569	1.33869	1.13558	1.93966
MSTRG.4260	chr10:102286256-102319755	+	33500	5.06668	5.00999	5.58337	5.11831	5.59173	5.99927
MSTRG.4256	chr10:102324063-102329217	+	5155	0.230197	0.215237	0.245193	1.0726	0.881602	2.45207
MSTRG.4261	chr10:102737572-102747213	-	9642	4.49962	7.07325	6.26142	5.48378	7.75771	6.4523
MSTRG.4265	chr10:102746554-102754158	+	7605	7.56322	7.05127	7.05906	8.99521	8.70356	7.37013
MSTRG.4266	chr10:102759610-102767593	+	7984	4.48038	5.07132	5.25669	5.61651	6.1725	5.96797
MSTRG.4269	chr10:102814462-102820762	-	6301	2.25433	1.59779	2.20965	0.645403	0.676308	0.986597
MSTRG.4270	chr10:102821761-102827647	+	5887	1.68484	1.62367	1.45806	2.61079	2.61887	3.052
MSTRG.4271	chr10:102826769-102827442	-	674	1.33874	1.0969	0.84757	0.208092	0.456616	0.688908
MSTRG.4280	chr10:103338639-103347989	-	9351	1.94631	2.01203	1.70918	0.818948	0.685515	1.05952
MSTRG.4279	chr10:103360496-103369418	+	8923	8.88115	7.71436	7.00127	3.15212	3.96476	2.73203
MSTRG.4277	chr10:103454307-103454797	+	491	1.00466	1.553	0.918263	0.330141	0.354883	0.172647
MSTRG.4278	chr10:103456416-103456888	-	473	1.10926	1.24731	1.26674	0.371821	0.244768	0.45329
MSTRG.4282	chr10:103457821-103458448	-	628	1.06101	1.1101	1.63961	0.592365	0.011483	1.04308
MSTRG.4283	chr10:103458940-103489866	-	30927	1.86099	1.7161	2.01168	0.816194	0.576945	0.962169
MSTRG.4286	chr10:103545859-103578175	-	32317	34.3497	31.76	35.2247	26.7648	26.5502	27.3968
MSTRG.4287	chr10:103558892-103559092	+	201	1.23067	0.735247	0.075091	0.455212	1.08896	0.966011
MSTRG.4291	chr10:103866340-103880205	-	13866	9.96221	13.711	11.7679	10.9158	8.62419	10.6355
MSTRG.4292	chr10:103892787-103909074	+	16288	10.949	11.0194	10.1949	4.72847	5.63137	6.04546
MSTRG.4294	chr10:103912172-103922357	+	10186	44.4196	54.2007	45.1844	25.0994	26.2046	23.7531
MSTRG.4295	chr10:103920696-103921993	-	1298	0.592669	0.514755	1.08513	0.745426	1.37529	0.121055
MSTRG.4296	chr10:104005289-104142654	+	137366	10.3656	11.1266	10.3681	13.3869	13.3271	12.7863
MSTRG.4299	chr10:104157796-104159253	-	1458	0.480189	0.297801	0	0.160387	1.23912	0
MSTRG.4301	chr10:104179571-104182893	+	3323	2.4861	2.44452	2.72734	2.29364	2.19356	2.10735
MSTRG.4307	chr10:104236248-104236945	-	698	0.077547	0	0.279598	0.553143	0.18318	1.32251
MSTRG.4306	chr10:104240552-104247990	-	7439	4.46657	10.8432	5.19718	6.89546	19.3843	17.2808
MSTRG.4313	chr10:104402084-104418164	+	16081	5.88918	9.26959	13.7769	11.486	12.0036	9.93707
MSTRG.4315	chr10:104421228-104422664	+	1437	0.828556	1.33089	0.905849	0.908491	0.590419	0.588578
MSTRG.4316	chr10:104423550-104423816	+	267	1.05891	0.905596	1.58018	1.3748	1.38698	0.252418
MSTRG.4323	chr10:104640387-104640629	-	243	0.522717	0.827474	0.880042	1.28985	1.4606	1.42878
MSTRG.4326	chr10:104678114-104687375	+	9262	0.794992	1.00405	1.03159	1.35633	1.27297	1.26217
MSTRG.4328	chr10:104852152-104852369	+	218	0	1.2174	0	0	0	0.056051
MSTRG.4327	chr10:104857065-104866441	-	9377	31.5741	33.4103	31.1973	28.4456	28.3828	26.8037
MSTRG.4331	chr10:104952385-104955084	+	2700	1.11718	1.56632	0.966371	0.131272	0.043024	0.167941
MSTRG.4332	chr10:105062555-105110891	-	48337	15.577	14.9438	15.2802	11.8826	12.6843	11.8394
MSTRG.4337	chr10:105184741-105206049	+	21309	10.676	9.69045	9.90122	8.95443	10.7261	9.28343
MSTRG.4338	chr10:105200089-105201602	-	1514	1.16741	1.7949	2.44888	1.96423	1.04505	0.804144
MSTRG.4340	chr10:105207147-105209243	+	2097	0.913834	1.10951	1.51466	0.542539	0.460826	0.795283
MSTRG.4344	chr10:105253736-105369807	+	116072	1.38862	1.56171	2.23148	3.57711	4.07744	2.76137
MSTRG.4345	chr10:105278659-105280059	-	1401	0	0	0	1.49885	2.98932	2.26879
MSTRG.4347	chr10:105353784-105453024	-	99241	12.0775	12.6055	12.8894	7.92462	9.40943	11.8638
MSTRG.4350	chr10:105767956-105788953	+	20998	23.5178	20.0825	21.3215	21.8854	17.6726	21.0344
MSTRG.4355	chr10:106024618-106026411	-	1794	1.54831	1.32202	1.68236	0.601027	0.326801	0.904275
MSTRG.4368	chr10:112188599-112220337	-	31739	2.82167	1.79068	2.05976	1.54355	1.44105	2.12502
MSTRG.4371	chr10:112227409-112232404	-	4996	1.08884	0.880448	1.1056	1.0645	0.774715	1.50388
MSTRG.4373	chr10:112256870-112257512	-	643	5.3693	3.1437	3.203	1.24326	1.41619	2.308
MSTRG.4374	chr10:112257596-112271302	+	13707	22.1462	21.4008	23.8294	28.6697	35.0225	27.604
MSTRG.4389	chr10:114190567-114206659	-	16093	13.7678	13.1632	13.0432	16.0316	13.7922	14.66
MSTRG.4390	chr10:114206757-114210449	+	3693	5.87608	5.66507	5.90334	5.72269	5.2496	5.75673
MSTRG.4399	chr10:114710166-114927434	+	217269	1.66969	1.58064	1.89572	1.94603	1.29841	1.6245
MSTRG.4396	chr10:115594484-115614099	-	19616	9.50905	9.48477	9.46882	7.57901	6.32748	6.29143
MSTRG.4398	chr10:115786488-115791108	+	4621	2.31461	1.64269	1.20664	0.643274	0.472081	0.542766
MSTRG.4404	chr10:116080757-116086651	+	5895	1.02206	0.433091	0.537865	0.996826	1.60054	0.761444
MSTRG.4406	chr10:116190871-116335296	-	144426	20.7901	18.9772	18.8514	12.796	11.9958	13.4787
MSTRG.4421	chr10:118644308-118807956	-	163649	9.77587	9.29628	8.66594	4.43103	5.62072	6.67607
MSTRG.4426	chr10:120431245-120432991	-	1747	0.266251	0.39739	0.695381	0.851939	1.0504	0.751123
MSTRG.4431	chr10:120793182-120840316	-	47135	118.722	112.457	105.517	54.8024	52.133	54.6073
MSTRG.4432	chr10:120795372-120816531	+	21160	1.45991	1.95411	2.26195	1.10746	0.958226	1.03319
MSTRG.4436	chr10:120898002-120898352	-	351	0.523803	1.19809	0.710512	0	0.218785	0.019582
MSTRG.4447	chr10:121336987-121356476	-	19490	13.2747	13.4296	13.2283	15.398	15.6408	14.3685
MSTRG.4445	chr10:121410882-121437331	+	26450	18.9113	20.3952	19.134	32.5866	38.8649	29.3876
MSTRG.4446	chr10:121411056-121411311	-	256	0.432742	0.507768	0.821299	1.06853	1.81888	0.413914
MSTRG.4453	chr10:121652295-121693282	+	40988	6.65545	6.51407	6.56315	6.10023	5.47712	5.48004
MSTRG.4448	chr10:122045469-122114725	-	69257	33.1925	39.1337	30.8985	26.1272	25.078	26.8939
MSTRG.4459	chr10:123600634-123687977	-	87344	9.08351	8.60127	9.59425	9.51762	8.49121	9.18627
MSTRG.4463	chr10:123718880-123734709	-	15830	8.32713	9.58818	8.75809	6.61462	7.78336	7.67256
MSTRG.4468	chr10:123872571-124191870	+	319300	1.6181	1.8261	1.81887	1.76391	2.04077	2.31106
MSTRG.4466	chr10:124591665-124639114	-	47450	3.2275	3.2003	2.88383	4.1122	4.07285	5.65914
MSTRG.4467	chr10:124647949-124658489	+	10541	1.56038	1.03572	1.24737	2.56029	1.83703	2.82391
MSTRG.4476	chr10:124753428-124753638	+	211	1.46223	0	0.479098	0.299345	0	0
MSTRG.4472	chr10:124896240-124898935	+	2696	3.7141	3.53397	3.51764	5.48438	6.29161	6.67705
MSTRG.4478	chr10:124914375-124924728	+	10354	26.9101	25.9077	27.1876	22.2577	23.8694	22.7572
MSTRG.4479	chr10:125753229-125753435	-	207	0	1.34657	0	0.269187	0.194908	0.265631
MSTRG.4480	chr10:125755441-125759268	-	3828	0.568193	0.890217	0.942422	0.878756	0.693684	1.15935
MSTRG.4483	chr10:126097391-126107505	-	10115	31.8514	32.1647	32.1176	41.0608	48.6406	38.1437
MSTRG.4489	chr10:126307861-126480439	-	172579	3.92435	4.02399	4.0626	3.98572	3.71544	4.25697
MSTRG.4493	chr10:126605438-126690046	+	84609	5.86539	6.04944	5.35116	6.65997	7.53316	6.42885
MSTRG.4495	chr10:126672213-126849739	-	177527	11.4238	12.2742	11.6667	11.0621	11.0773	10.8642
MSTRG.4502	chr10:127414335-127452712	+	38378	6.79658	6.73866	7.15815	5.24108	5.03567	6.02494
MSTRG.4503	chr10:127512179-127531374	+	19196	21.8402	23.9143	23.0186	22.7753	22.8462	24.1227
MSTRG.4504	chr10:127524906-127585005	-	60100	14.9468	15.2138	12.9318	17.6558	16.8739	16.6105
MSTRG.4510	chr10:127700964-128077024	-	376061	1.62999	1.74739	1.45061	1.15278	0.869958	0.874297
MSTRG.4513	chr10:128588178-128593895	-	5718	1.52359	1.48499	1.32614	0.327427	0.205792	0.988778
MSTRG.4518	chr10:129705325-129884122	+	178798	1.29315	1.11525	1.23562	2.44551	1.89896	2.60792
MSTRG.4521	chr10:129893771-129924649	-	30879	29.3962	27.3619	28.4381	31.9562	28.3168	32.6827
MSTRG.4522	chr10:129901344-129902330	+	987	0.905606	0.873693	0.521886	0.793105	1.189	0.804119
MSTRG.4523	chr10:131265652-131565368	+	299717	3.65265	4.0667	3.62776	2.27506	2.37241	1.84758
MSTRG.4528	chr10:131934663-131981907	+	47245	21.896	22.1465	22.7682	23.6482	26.6504	23.606
MSTRG.4527	chr10:133464180-133466459	+	2280	0.151463	0.135914	0.183176	0.73311	0.803994	1.17133
MSTRG.4529	chr10:133747960-133773348	+	25389	4.62218	4.52593	4.03974	2.87795	2.87896	4.26037
MSTRG.4534	chr10:133922667-133923977	+	1311	0.020644	0	0	0.850426	0.645083	1.17845
MSTRG.4537	chr10:134143785-134145335	-	1551	4.85425	4.44679	4.89482	3.28201	3.68314	3.52959
MSTRG.4539	chr10:134218512-134218912	-	401	1.28683	1.27783	0	0.620963	1.07904	0.725601
MSTRG.4541	chr10:134351527-134596978	+	245452	2.0495	2.3744	2.3287	3.75377	5.60741	4.58347
MSTRG.4540	chr10:134817681-134818076	+	396	0.69528	0.434253	0.376711	4.69113	5.59859	12.5578
MSTRG.4545	chr10:134989167-134989368	+	202	0	0.275789	0.460478	0.617527	0.520075	1.24572
MSTRG.4546	chr10:134993807-134994351	+	545	1.18684	1.10702	1.03402	0.984075	0.620128	0.932894
MSTRG.4549	chr10:135093144-135106814	-	13671	5.53703	5.09163	5.83478	5.09707	5.37269	4.94331
MSTRG.4556	chr10:135207678-135233968	+	26291	2.06983	2.38411	2.24178	2.06104	1.88482	2.02017
MSTRG.4559	chr10:135238697-135385620	+	146924	2.58553	2.28882	2.15396	1.17523	0.924312	2.06815
MSTRG.4558	chr10:135516668-135518105	+	1438	0.907821	0.778202	1.37492	0.4611	0.353993	0.604485
MSTRG.4580	chr11:216391-236326	-	19936	1.53382	1.34496	1.6219	0.893299	0.837946	1.03231
MSTRG.4581	chr11:236558-252617	+	16060	7.43366	7.30245	6.75509	10.1355	11.8853	10.4864
MSTRG.4583	chr11:308163-315272	+	7110	31.4755	33.6148	34.1509	33.2841	36.5953	30.5787
MSTRG.4588	chr11:319716-320917	+	1202	0.63925	1.06086	1.34659	0.577997	0.983486	0.888945
MSTRG.4593	chr11:371601-382072	+	10472	4.73518	5.14979	4.53736	9.68131	10.8352	9.95853
MSTRG.4595	chr11:405728-414984	-	9257	2.36816	2.36083	1.5974	3.39091	4.44903	3.64008
MSTRG.4598	chr11:450347-491399	+	41053	4.31635	4.36056	4.03552	3.88833	4.20349	3.78849
MSTRG.4600	chr11:493497-494106	+	610	1.11243	0.808623	1.06884	0.812781	0.504203	0.689199
MSTRG.4601	chr11:494512-506785	-	12274	4.1659	3.99842	4.28091	4.33169	4.32343	4.87281
MSTRG.4602	chr11:495264-495552	+	289	1.38098	0.275763	0.496752	1.58629	0.731746	0.88855
MSTRG.4603	chr11:497416-505251	+	7836	0.520877	0.790504	0.605794	1.36367	1.09204	1.54032
MSTRG.4604	chr11:509020-511961	+	2942	0.787634	1.17146	1.09268	0.165026	0.126074	0.387232
MSTRG.4607	chr11:534268-535535	+	1268	0.933787	0.738957	0.792072	0.27772	1.14465	0.817283
MSTRG.4609	chr11:546429-546781	+	353	0	0	0	1.42919	0.321901	0.313697
MSTRG.4612	chr11:560963-563993	+	3031	2.61028	2.0091	1.7683	1.40461	1.72171	1.52866
MSTRG.4614	chr11:607477-607694	-	218	0.293814	0.264421	0	0.378323	1.06663	0.386224
MSTRG.4616	chr11:635546-635818	-	273	1.20351	0	0.09643	0.342694	0.636841	0.544361
MSTRG.4623	chr11:697486-706955	-	9470	3.37844	3.666	3.20525	1.6621	2.11263	2.08947
MSTRG.4627	chr11:700409-701496	-	1088	1.3731	1.42267	1.38886	0.173286	0.154063	0.397989
MSTRG.4628	chr11:705283-709432	-	4150	0.516855	1.44139	1.22416	0.217055	0.259877	0.375526
MSTRG.4625	chr11:709368-727722	+	18355	9.08559	9.85574	8.58537	3.94144	5.21434	5.16132
MSTRG.4619	chr11:767222-777484	-	10263	3.14905	2.70474	2.38348	0.773295	0.885691	0.953759
MSTRG.4620	chr11:777608-784180	+	6573	4.88736	4.79396	3.38717	1.8709	2.70852	2.55574
MSTRG.4634	chr11:809964-812874	-	2911	1.73237	2.83705	2.56356	2.1774	2.98115	1.62016
MSTRG.4636	chr11:818902-825218	+	6317	20.1216	20.2924	19.1367	13.301	15.697	12.587
MSTRG.4639	chr11:832997-838798	+	5802	8.17793	15.0032	10.0866	12.3051	13.5331	11.1621
MSTRG.4641	chr11:842844-867111	+	24268	3.34236	5.34332	4.47753	2.32693	2.6703	2.75124
MSTRG.4643	chr11:925945-1010237	+	84293	3.36748	3.45805	3.35269	3.58418	4.0159	4.35623
MSTRG.4646	chr11:964576-965390	+	815	2.09949	2.12936	1.89583	1.85318	1.30797	5.98577
MSTRG.4650	chr11:1490687-1502815	-	12129	1.76467	1.83993	2.59261	2.98742	3.33529	3.08021
MSTRG.4656	chr11:1756382-1784636	-	28255	7.42304	8.70964	8.36422	14.4769	15.4032	12.6583
MSTRG.4655	chr11:1794782-1796128	+	1347	0.176588	0	0	2.34859	1.1216	2.46762
MSTRG.4659	chr11:1972855-1977829	+	4975	3.82644	3.47744	3.78132	2.41406	2.19004	2.39498
MSTRG.4661	chr11:2016446-2019044	-	2599	28.5011	21.8693	20.3371	24.0001	31.2956	20.7127
MSTRG.4662	chr11:2016770-2019050	+	2281	1.04608	0.866097	0.46273	1.03859	1.84967	0.885262
MSTRG.4670	chr11:2400386-2418529	+	18144	6.75705	7.4395	7.2442	14.2699	16.0189	12.9686
MSTRG.4671	chr11:2465914-2869741	+	403828	4.12753	4.6115	4.31079	3.11293	3.39327	2.58989
MSTRG.4674	chr11:2798930-2869082	-	70153	1.12388	0	0	0.03746	0	0.199667
MSTRG.4676	chr11:2904448-2906979	-	2532	21.263	17.6994	19.4404	43.8402	36.5254	34.8106
MSTRG.4677	chr11:2905056-2907080	+	2025	0.412129	0.576718	0.143581	0.96627	1.4813	1.32235
MSTRG.4680	chr11:2909327-2924970	-	15644	2.69265	2.66557	2.28016	4.73909	5.04349	4.25271
MSTRG.4681	chr11:2923513-2946457	+	22945	1.99871	2.28478	2.04916	2.32548	1.74877	3.53535
MSTRG.4682	chr11:2925224-2928352	+	3129	0.807335	1.06739	0.956508	1.69065	1.78282	3.61777
MSTRG.4678	chr11:2949503-2951669	-	2167	40.4302	41.9819	43.5301	80.6591	83.6059	79.0054
MSTRG.4679	chr11:2949702-2950820	+	1119	0.824778	0.99388	0.604313	2.17747	3.8334	1.3491
MSTRG.4683	chr11:2966561-3013488	-	46928	40.0263	36.53	36.7055	28.8084	25.9133	33.944
MSTRG.4684	chr11:2966712-2981020	+	14309	0.858471	0.952324	0.871438	0.639472	1.89185	0.292712
MSTRG.4688	chr11:3022159-3039114	+	16956	1.11372	1.32435	0.984944	1.22099	1.62591	1.40357
MSTRG.4687	chr11:3022159-3050287	-	28129	30.3009	32.6849	29.6871	32.3027	34.6134	33.0771
MSTRG.4691	chr11:3100307-3137911	-	37605	2.03605	1.23547	1.47678	0.920263	0.605922	2.16468
MSTRG.4695	chr11:3379996-3400369	-	20374	7.68415	5.81905	5.59492	5.52186	5.19899	7.71181
MSTRG.4706	chr11:3696241-3781824	-	85584	17.276	17.755	17.2982	18.8217	17.0761	17.9745
MSTRG.4775	chr11:6469843-6495153	-	25311	1.41824	1.22398	1.30845	2.00582	1.8394	2.10029
MSTRG.4776	chr11:6499314-6502527	-	3214	8.53423	8.85725	7.51236	10.412	10.2857	9.79895
MSTRG.4777	chr11:6502677-6593252	+	90576	0.822651	3.39281	2.70822	1.30267	1.00271	0.803267
MSTRG.4779	chr11:6512301-6512687	-	387	1.29329	0.333389	0.25033	0	0.135982	0.348298
MSTRG.4780	chr11:6562097-6565164	-	3068	3.0262	2.46775	2.68454	0.837422	1.02231	1.08667
MSTRG.4781	chr11:6573903-6577216	+	3314	1.16564	0.980251	1.19352	0.340962	0.155032	0.894179
MSTRG.4782	chr11:6609403-6614379	-	4977	2.7963	2.39103	2.38634	0.955113	0.545561	2.15401
MSTRG.4783	chr11:6621150-6624827	-	3678	4.44289	4.32498	4.55777	2.86898	2.7657	2.81285
MSTRG.4784	chr11:6624993-6633898	-	8906	3.94111	4.06704	3.64388	4.32847	4.12618	3.9632
MSTRG.4786	chr11:6632997-6633426	+	430	0.177326	1.3248	0.16525	0.495028	0.866032	0.938211
MSTRG.4763	chr11:6696808-6698579	-	1772	0.593005	0.793172	0.703893	0.472935	0.266073	1.44894
MSTRG.4771	chr11:8008896-8009161	-	266	0.250291	0.469771	1.07083	1.07835	1.23979	0.343087
MSTRG.4774	chr11:8245857-8256297	-	10441	0.715488	1.14789	1.11062	1.36973	1.25493	1.59179
MSTRG.4802	chr11:8703887-8707395	-	3509	5.89137	7.78602	6.66741	5.87798	8.47001	5.12101
MSTRG.4803	chr11:8704762-8707395	+	2634	73.43	81.2747	78.9553	56.8053	62.8945	56.4299
MSTRG.4805	chr11:8715436-8892626	-	177191	1.95681	1.47972	1.64093	1.12373	1.03269	1.38633
MSTRG.4789	chr11:8969048-8986490	-	17443	10.7643	6.16861	6.35696	8.20449	10.2077	10.7355
MSTRG.4791	chr11:9000333-9001055	+	723	0.764338	0.906364	0.625415	0.303697	0.839477	1.13434
MSTRG.4795	chr11:9302218-9336180	-	33963	6.53472	7.93232	7.18674	15.3269	15.3015	16.5309
MSTRG.4797	chr11:9445333-9469673	+	24341	109.183	110.743	114.615	78.2329	71.2054	71.158
MSTRG.4814	chr11:9603091-9615004	+	11914	15.9766	14.8851	12.5098	10.5665	14.913	11.1457
MSTRG.4815	chr11:9741613-9774538	+	32926	27.9154	26.3957	26.3653	31.7654	31.5125	31.2119
MSTRG.4820	chr11:9779843-9833450	+	53608	3.06039	1.70475	2.41589	0.526967	0.173825	0.307578
MSTRG.4821	chr11:9800701-9861150	-	60450	4.82728	4.45482	4.6044	3.88036	2.90184	3.67481
MSTRG.4825	chr11:10292761-10293372	-	612	30.1512	22.9649	27.1758	25.9858	28.4079	26.1408
MSTRG.4817	chr11:10317819-10325517	-	7699	4.66432	4.07021	4.65049	0.218499	0.130743	0.164786
MSTRG.4831	chr11:10795569-10800411	-	4843	0.860343	0.980689	0	1.22392	1.01144	1.07464
MSTRG.4842	chr11:10821998-10822380	+	383	1.13789	0.533237	0.936601	0.492841	0.914766	0.284475
MSTRG.4843	chr11:10825545-10830372	+	4828	0.44844	0.967734	0.918465	1.19194	0.900425	0.780661
MSTRG.4832	chr11:11012448-11016836	+	4389	0	0.288502	0.346813	0.507857	1.65305	1.00153
MSTRG.4839	chr11:12022409-12023973	-	1565	1.45803	1.586	1.44542	2.41304	2.494	2.34027
MSTRG.4848	chr11:12399110-12556876	+	157767	5.66923	5.84203	5.26051	2.13891	1.75616	2.05281
MSTRG.4856	chr11:12696164-12966030	+	269867	32.767	31.3937	27.7964	23.1613	24.3898	22.1927
MSTRG.4858	chr11:12846582-13012633	-	166052	7.9494	7.53589	8.67766	2.57248	2.28476	3.07518
MSTRG.4851	chr11:13017241-13049405	-	32165	11.9638	7.46997	13.6248	4.43754	1.60043	3.04414
MSTRG.4853	chr11:13073339-13156127	-	82789	2.05047	1.91249	2.05699	1.5454	1.00225	1.13243
MSTRG.4854	chr11:13105555-13110905	+	5351	1.49742	1.28088	1.21402	0.750647	0.547788	1.42173
MSTRG.4855	chr11:13198088-13199561	-	1474	2.46433	2.90894	3.45707	4.13809	4.46222	4.36406
MSTRG.4863	chr11:13299378-13408813	+	109436	2.54912	1.91296	2.40696	8.66237	6.76659	7.453
MSTRG.4865	chr11:13441040-13484727	-	43688	12.6824	10.0135	10.5127	13.487	10.7399	13.239
MSTRG.4870	chr11:13690258-13753882	+	63625	16.778	15.7628	16.1091	17.542	15.8886	17.8518
MSTRG.4869	chr11:14297267-14298913	-	1647	1.06372	1.40913	1.59817	1.39462	1.47903	2.28597
MSTRG.4874	chr11:14299510-14380693	-	81184	13.8422	13.8559	12.9615	26.7537	28.6849	25.8764
MSTRG.4875	chr11:14479096-14521408	-	42313	54.0732	54.1652	53.5861	67.7443	69.5926	62.6046
MSTRG.4882	chr11:16760206-16776893	+	16688	26.1414	19.4752	17.5101	13.9706	13.5065	13.3028
MSTRG.4883	chr11:16769677-16776776	-	7100	0.563045	0.637279	1.21122	1.05268	0.978104	0.744483
MSTRG.4884	chr11:16798864-17035959	-	237096	4.50366	4.46253	4.30317	3.36323	3.14994	4.18238
MSTRG.4885	chr11:16838562-16838792	+	231	0.543623	0	0	1.09508	0	0.233074
MSTRG.4887	chr11:16914171-16996592	-	82422	8.09929	6.82061	7.09591	5.91364	14.2996	5.76097
MSTRG.4894	chr11:17095957-17099200	+	3244	0.489099	0.56376	1.39473	0.695747	0.690711	0.6358
MSTRG.4899	chr11:17298288-17371521	+	73234	7.64361	6.21624	5.78198	9.39128	7.30475	8.97946
MSTRG.4891	chr11:17373336-17405078	+	31743	9.47979	5.1953	2.25608	4.33625	1.777	5.70049
MSTRG.4904	chr11:18101020-18127638	-	26619	6.44332	5.0747	4.65804	6.30508	5.86681	6.59475
MSTRG.4906	chr11:18344143-18389069	+	44927	11.5863	11.7379	9.99868	13.2992	11.1202	10.7913
MSTRG.4908	chr11:18416119-18429394	-	13276	0.836791	0.695034	0.910037	1.43839	1.52297	1.21797
MSTRG.4907	chr11:18416541-18427121	+	10581	75.612	84.8739	92.5971	124.569	137.25	117.501
MSTRG.4915	chr11:18560638-18627280	+	66643	1.04052	1.39084	0.807568	0	0.28699	1.20012
MSTRG.4919	chr11:18626012-18627976	+	1965	1.38185	1.14579	0.924288	0.840615	0.390694	0.712612
MSTRG.4920	chr11:18627953-18656338	-	28386	8.03931	6.51614	6.92501	11.2707	11.7275	11.0734
MSTRG.4921	chr11:19138646-19197941	+	59296	4.5346	3.8833	4.53159	3.75917	3.41984	3.6731
MSTRG.4929	chr11:19619710-20143144	+	523435	4.4723	4.67975	5.41572	3.3355	3.2754	3.14914
MSTRG.4927	chr11:20589765-20594161	+	4397	0.000323	0.000115	0.011855	1.58055	1.08958	3.14493
MSTRG.4943	chr11:22835345-22851411	-	16067	9.80131	7.27927	9.23121	12.1297	9.3363	9.7633
MSTRG.4947	chr11:23205771-23206108	-	338	0.23096	0.45629	0.453235	1.30069	1.4107	1.98323
MSTRG.4942	chr11:23909854-23910087	-	234	0.008713	0.040577	0	0.762442	0.537634	1.63956
MSTRG.4948	chr11:27329845-27385415	-	55571	24.2787	22.2862	21.9105	13.9432	11.626	12.7435
MSTRG.4949	chr11:27362312-27384544	+	22233	1.39866	0.277629	0.951879	0.546518	0.748919	1.02222
MSTRG.4952	chr11:27516123-27528569	-	12447	11.839	14.0811	17.3385	23.2186	21.7141	23.8978
MSTRG.4966	chr11:28129948-28352176	+	222229	4.99327	1.49913	4.67914	1.7934	4.32161	3.8463
MSTRG.4960	chr11:28724174-28907298	+	183125	1.4398	1.34284	1.2195	0.508046	0.271101	0.457484
MSTRG.4961	chr11:28973406-28973621	-	216	0.523177	1.83973	1.02954	0.127031	0.021506	0.3459
MSTRG.5021	chr11:31391387-31454699	+	63313	1.97633	1.60364	2.66183	1.94399	2.74403	2.35778
MSTRG.5022	chr11:31453949-31531110	-	77162	5.16469	4.37107	5.81559	5.36118	5.40401	4.8503
MSTRG.4973	chr11:32605430-32623923	+	18494	28.82	27.3123	26.9161	25.5293	26.1054	23.1925
MSTRG.4977	chr11:32850857-32879669	+	28813	6.26671	6.20571	5.56687	13.6172	12.5682	14.1756
MSTRG.4978	chr11:32875284-32875555	-	272	0.559853	0.596663	0.51683	2.07594	1.61085	2.19701
MSTRG.4971	chr11:32946752-33001812	+	55061	18.2553	17.0822	23.5445	16.7709	14.5638	16.906
MSTRG.4979	chr11:33060963-33101000	+	40038	3.48621	5.07268	4.58959	2.59351	3.67503	5.43073
MSTRG.4982	chr11:33104921-33105197	+	277	0.353688	0.209497	0.9244	0.241165	0	1.1924
MSTRG.4986	chr11:33279133-33378566	+	99434	8.17006	8.3302	7.82565	10.2888	10.927	13.4515
MSTRG.4992	chr11:33762492-33796089	-	33598	4.09066	3.26945	4.37413	3.20107	3.83513	4.19132
MSTRG.4990	chr11:33880122-33891690	-	11569	0.0164322	0	0	1.3747	1.49606	1.50689
MSTRG.4994	chr11:34118786-34120984	-	2199	1.34442	0.852019	0.879563	0.421313	1.07844	0.330586
MSTRG.5000	chr11:34663932-34684832	+	20901	0.0401281	0	0.0502083	3.56865	3.08647	3.52481
MSTRG.5001	chr11:34895582-34938046	-	42465	6.28813	5.66711	5.27118	4.03934	4.00147	4.26094
MSTRG.5004	chr11:35029195-35031331	-	2137	0.276761	0.081375	0.249005	0.331399	0.257201	1.19521
MSTRG.5005	chr11:35042263-35043143	+	881	1.02419	1.04969	1.34326	1.9483	1.20717	1.33688
MSTRG.5041	chr11:35160735-35251432	-	90698	0.184545	0.45954	0.455117	0.737646	1.05111	0.567655
MSTRG.5008	chr11:35684716-35747481	-	62766	2.56921	2.25251	2.46831	1.90028	1.3499	1.66683
MSTRG.5015	chr11:36293872-36310978	-	17107	2.21763	2.06367	2.17154	3.17844	3.40539	2.18708
MSTRG.5043	chr11:36397931-36486892	+	88962	1.6946	1.90952	0.602426	0.597127	1.67232	0.616813
MSTRG.5037	chr11:36505350-36507715	-	2366	3.49003	3.01198	3.57763	3.26643	3.1345	3.4889
MSTRG.5047	chr11:37599940-37604707	-	4768	0	0	0	7.67677	7.08757	6.6589
MSTRG.5049	chr11:38316109-38358731	-	42623	0.874816	1.20147	0.79879	1.60004	1.24741	1.28195
MSTRG.5053	chr11:43400808-43516477	+	115670	4.21203	4.51568	4.35465	2.63201	2.78872	2.91764
MSTRG.5062	chr11:43702345-43877954	+	175610	8.51918	8.3647	8.11777	8.64842	7.96593	7.7651
MSTRG.5070	chr11:43879167-43883296	+	4130	1.33197	0.958699	1.343	1.17545	1.20904	1.04245
MSTRG.5071	chr11:43884880-43887055	+	2176	1.02875	0.878568	1.21715	0.749016	0.744966	0.964001
MSTRG.5061	chr11:44146419-44266975	+	120557	7.00567	6.8066	7.03448	12.1683	12.179	11.296
MSTRG.5058	chr11:44268970-44274633	+	5664	1.05695	0.832243	1.09156	0.833899	0.923849	0.828848
MSTRG.5060	chr11:44322870-44327150	+	4281	1.56374	2.33591	1.75406	1.2257	1.23297	1.68855
MSTRG.5076	chr11:44587217-44641913	+	54697	2.18381	2.03077	1.97722	5.83323	4.11335	3.73401
MSTRG.5079	chr11:45202243-45247734	+	45492	1.54904	1.64571	1.71545	1.9149	2.10384	1.85308
MSTRG.5092	chr11:45955536-46142561	-	187026	6.68251	6.35459	5.5265	6.69032	5.91546	7.52414
MSTRG.5090	chr11:46316314-46342959	+	26646	0.669261	0.599617	0.558833	1.80159	1.85751	1.6094
MSTRG.5098	chr11:46366982-46401832	+	34851	2.83414	3.0548	2.93007	5.55785	5.82639	5.74475
MSTRG.5100	chr11:46401388-46401595	-	208	0.117971	0	0	0.496971	1.19756	0.285747
MSTRG.5095	chr11:46417966-46615571	-	197606	3.85148	3.63336	3.88483	4.87132	4.2738	4.15091
MSTRG.5106	chr11:46639091-46696070	+	56980	11.4598	7.57004	10.9898	11.0484	7.59054	7.1817
MSTRG.5108	chr11:46765090-46842808	-	77719	39.9871	36.5203	37.735	33.8824	29.629	32.1196
MSTRG.5112	chr11:46862814-46951313	+	88500	9.2225	7.60293	8.20112	4.74373	3.87154	9.69166
MSTRG.5114	chr11:46878421-46920718	-	42298	0.814955	0.878193	0.656779	1.91886	1.56201	1.92485
MSTRG.5107	chr11:46952802-46956334	+	3533	0.736312	0.724411	1.216	0.34913	0.369513	1.0467
MSTRG.5115	chr11:46958296-47183779	+	225484	3.50079	3.54662	3.20531	2.38895	2.19872	2.24779
MSTRG.5117	chr11:47092182-47106368	+	14187	1.73175	1.55031	1.67041	0.827033	0.526937	2.64211
MSTRG.5119	chr11:47145998-47148110	-	2113	0.600283	0.541949	0.333646	0.673506	0.341111	1.68126
MSTRG.5120	chr11:47173416-47178511	-	5096	0.557311	0.721587	0.891137	0.436071	0.538957	1.3347
MSTRG.5121	chr11:47179871-47180177	-	307	1.18776	1.14171	0.438471	0.488823	0.75741	1.12563
MSTRG.5122	chr11:47186766-47207958	-	21193	13.6633	12.5014	12.8082	9.21954	10.2773	11.3567
MSTRG.5123	chr11:47199472-47200797	+	1326	0.442102	0.52387	0.248598	0.603415	1.26422	0.920303
MSTRG.5124	chr11:47201108-47202065	+	958	0.615266	1.31473	0	0.378296	0	0.207997
MSTRG.5133	chr11:47236121-47262876	+	26756	7.12127	6.59728	7.08132	5.44648	5.11518	5.74442
MSTRG.5135	chr11:47256031-47270367	-	14337	2.78206	3.0091	2.85484	2.58431	2.71059	2.95049
MSTRG.5137	chr11:47291244-47350957	+	59714	13.9049	13.1996	12.906	22.2188	21.4621	22.7164
MSTRG.5128	chr11:47430179-47438046	+	7868	4.5475	5.10566	3.35608	5.93252	4.51787	5.9156
MSTRG.5130	chr11:47440326-47447991	+	7666	0.739875	1.48189	1.02756	1.85512	2.87397	1.0686
MSTRG.5141	chr11:47487496-47587072	-	99577	31.6024	29.8969	30.2022	18.1208	22.5238	27.8097
MSTRG.5144	chr11:47573821-47595013	+	21193	18.8971	18.7917	18.0476	16.1609	17.3397	17.0085
MSTRG.5132	chr11:47636710-47636988	-	279	0.115111	0.316846	1.10082	0.120286	0	0.681573
MSTRG.5149	chr11:47738069-47788838	-	50770	19.4296	16.4559	16.715	8.47252	6.87498	15.1792
MSTRG.5151	chr11:47786894-47788858	+	1965	0.41728	1.12775	0.203285	0	0.416906	0.605615
MSTRG.5160	chr11:49455228-49455767	-	540	0.567338	0.506784	0.490731	0.612072	1.25318	0.528371
MSTRG.5159	chr11:56853848-56854303	-	456	1.87806	2.62834	1.82662	1.87183	0.892899	1.75619
MSTRG.5161	chr11:57067150-57089809	-	22660	14.7034	16.5252	19.6402	27.2559	23.7838	21.0531
MSTRG.5162	chr11:57077640-57078024	+	385	0.900258	1.17368	0.350094	1.76186	0.970994	1.18719
MSTRG.5163	chr11:57093707-57099662	+	5956	1.70916	1.14762	0.805856	1.215	1.76603	0.959254
MSTRG.5170	chr11:57156628-57194125	-	37498	13.046	16.4976	16.0103	11.0212	10.3077	12.0428
MSTRG.5171	chr11:57182518-57185261	+	2744	0.80788	0.535075	1.1185	0	0.953204	0.585116
MSTRG.5167	chr11:57252007-57283159	-	31153	3.11225	3.50597	2.79829	1.13595	1.13408	1.5385
MSTRG.5173	chr11:57435415-57468659	+	33245	11.787	17.087	17.1051	18.7062	18.0764	14.8237
MSTRG.5178	chr11:57471496-57472565	+	1070	0.625973	0.928599	0.795094	0.732013	1.24595	1.9119
MSTRG.5180	chr11:58346462-58377322	-	30861	0.790654	1.08443	0.415245	0.881892	0.868665	1.19725
MSTRG.5192	chr11:58910329-58922512	+	12184	5.23727	5.07973	6.75207	2.63922	2.01245	3.80498
MSTRG.5187	chr11:58939181-58939521	+	341	0	0	0	0.614168	0.512704	1.36277
MSTRG.5193	chr11:59341871-59368329	-	26459	14.6854	13.0828	13.1556	17.0947	8.12582	15.7766
MSTRG.5196	chr11:59404198-59435756	-	31559	26.0499	27.2612	26.6076	21.7545	20.5526	20.5637
MSTRG.5204	chr11:60603469-60617918	-	14450	0.192919	0.353689	0.440405	0.82798	1.52999	0.72625
MSTRG.5208	chr11:60668328-60670945	+	2618	0.812664	0.602242	0.668359	0.817612	1.41398	0
MSTRG.5213	chr11:60681634-60690915	+	9282	19.5985	22.8348	21.9043	30.5088	37.6609	30.1277
MSTRG.5215	chr11:60691964-60702887	+	10924	6.30194	6.37664	7.57322	9.83685	9.96289	9.60912
MSTRG.5216	chr11:60703483-60704338	-	856	0.597136	0.578272	0.279247	0.66094	1.04945	0.748747
MSTRG.5221	chr11:61100694-61113975	+	13282	1.96623	1.80185	1.92409	1.14927	1.14071	1.15006
MSTRG.5223	chr11:61129833-61145677	+	15845	2.16182	2.07781	2.5923	2.25878	2.08309	2.53123
MSTRG.5218	chr11:61153969-61154206	+	238	0.268366	0.195061	0.25883	0.286005	0.244044	1.40063
MSTRG.5219	chr11:61159865-61166323	+	6459	4.59035	4.81213	4.58455	2.24004	3.27486	3.24906
MSTRG.5227	chr11:61183651-61197005	-	13355	16.9679	18.8409	20.7882	13.6975	12.9051	14.8171
MSTRG.5229	chr11:61197596-61241009	+	43414	2.42616	2.5922	2.36109	3.21487	3.11013	3.40571
MSTRG.5224	chr11:61282790-61319242	-	36453	0.155703	0.163634	0.0930403	1.6985	1.57329	1.50395
MSTRG.5236	chr11:61520114-61555990	+	35877	4.27212	5.01185	4.81336	6.56593	6.01083	6.96308
MSTRG.5239	chr11:61560398-61566442	-	6045	1.35485	1.94378	1.74671	1.52113	1.34472	1.40105
MSTRG.5240	chr11:61569785-61582604	-	12820	30.4825	40.2884	32.6755	22.788	18.2485	19.4433
MSTRG.5241	chr11:61579249-61591902	+	12654	0.849204	1.23814	1.12222	1.09795	0.540967	3.02073
MSTRG.5231	chr11:61640998-61646905	-	5908	8.33821	11.1025	9.35372	10.5902	13.6367	13.8035
MSTRG.5232	chr11:61641061-61643916	+	2856	0.663678	0.901565	0.447856	0.648726	1.3438	0.626454
MSTRG.5246	chr11:61732108-61737365	+	5258	1.30111	1.63213	1.46144	1.40606	1.70551	1.32198
MSTRG.5248	chr11:61736886-61737679	-	794	0.3155	0.041052	0.33529	1.28749	1.48119	1.07266
MSTRG.5242	chr11:61776368-61776668	-	301	1.00104	1.53463	0.696181	0.078887	0	0.379308
MSTRG.5243	chr11:61778098-61779055	-	958	1.27033	0.469454	0.736819	0.049076	0.057781	0.356734
MSTRG.5245	chr11:61780641-61784769	+	4129	0.937659	0.782736	1.19511	0.093621	0.048007	0.052019
MSTRG.5249	chr11:61811982-61818899	+	6918	2.99921	2.30572	1.56693	0.665344	0.472837	0.457923
MSTRG.5250	chr11:61812150-61813648	-	1499	1.27984	1.14874	1.2311	0.425267	0.187756	1.10338
MSTRG.5251	chr11:61814239-61823404	-	9166	6.76373	5.86099	6.03084	3.27726	2.46256	3.52251
MSTRG.5252	chr11:61891483-61923047	+	31565	15.7482	15.2203	15.4752	21.9678	22.2096	31.8824
MSTRG.5253	chr11:61898027-61919290	-	21264	0.72142	0.770849	0.724954	1.23955	1.82199	1.73652
MSTRG.5258	chr11:62201019-62314268	-	113250	64.558	45.1869	32.5168	41.2569	32.9757	49.6572
MSTRG.5260	chr11:62289256-62289455	+	200	0.024358	1.15868	0.328473	0.32689	0.939454	0.314068
MSTRG.5263	chr11:62327073-62341322	+	14250	3.42649	3.81648	3.87485	2.70744	4.08392	2.35687
MSTRG.5265	chr11:62341642-62347134	+	5493	2.51346	2.48314	2.67098	2.19205	1.95855	3.17026
MSTRG.5266	chr11:62360686-62380002	-	19317	12.155	12.664	13.1307	17.4023	17.9418	13.3052
MSTRG.5269	chr11:62382769-62389618	-	6850	4.76229	5.24194	5.93575	5.00584	6.74449	5.07479
MSTRG.5271	chr11:62400669-62402419	+	1751	1.24441	0.686269	0.674267	0.66812	0.554627	0
MSTRG.5272	chr11:62414321-62432689	-	18369	5.25889	4.80043	5.39572	8.45725	7.50004	5.69766
MSTRG.5273	chr11:62430525-62432674	+	2150	0	0	0.8845	1.06794	2.17162	0.975035
MSTRG.5277	chr11:62445004-62445858	+	855	1.17598	1.69537	1.22452	1.25141	2.15879	1.43651
MSTRG.5284	chr11:62459882-62495085	-	35204	22.1167	20.7958	20.9116	23.6768	25.2193	22.7381
MSTRG.5286	chr11:62482690-62487591	+	4902	0.223144	0.374148	0.232637	1.09306	1.97974	0.857367
MSTRG.5287	chr11:62489791-62494977	+	5187	1.42484	1.86711	1.1678	1.62957	2.17776	1.80299
MSTRG.5288	chr11:62495167-62507765	+	12599	12.5218	12.2194	13.474	11.2127	10.7873	12.7914
MSTRG.5289	chr11:62499462-62559493	-	60032	8.09559	2.16591	7.17687	0.950341	3.87601	1.15646
MSTRG.5291	chr11:62529109-62534179	+	5071	17.2439	17.6526	19.2947	14.7	15.574	13.6397
MSTRG.5296	chr11:62559703-62572942	-	13240	6.71769	8.70018	7.03652	10.6643	14.7737	10.8406
MSTRG.5283	chr11:62600384-62607852	-	7469	9.48916	8.92998	8.49719	7.33626	8.35559	7.5262
MSTRG.5304	chr11:62619769-62623230	-	3462	23.6293	19.4192	25.5949	10.4569	12.3031	12.3423
MSTRG.5305	chr11:62623640-62656327	+	32688	33.4071	34.2942	34.4774	43.6874	64.0285	45.2165
MSTRG.5306	chr11:62648340-62652729	-	4390	0.689725	1.0275	0.692696	1.1051	1.61746	1.04573
MSTRG.5309	chr11:63449045-63527354	+	78310	13.0147	27.7096	38.9109	41.8665	35.4632	21.6636
MSTRG.5311	chr11:63527160-63536491	-	9332	2.25232	2.74788	2.79665	4.56407	5.21601	4.71111
MSTRG.5308	chr11:63580892-63595190	+	14299	11.006	9.79166	9.9584	8.67514	11.3856	9.59974
MSTRG.5312	chr11:63662658-63678491	+	15834	3.95722	3.3124	4.23219	5.96773	7.06928	5.68268
MSTRG.5316	chr11:63733530-63733767	+	238	0.409371	0.190184	0	0	0	1.2049
MSTRG.5317	chr11:63736560-63737773	+	1214	1.11332	0.99522	1.16636	1.00256	0.612322	2.00249
MSTRG.5320	chr11:63882871-63933529	-	50659	4.71459	3.6663	4.08614	2.18918	2.00472	2.0238
MSTRG.5325	chr11:63962054-63971880	-	9827	0.323648	0.521608	0.44942	0.978699	1.31408	0.813868
MSTRG.5334	chr11:63998124-64001619	+	3496	1.37586	1.59387	1.52977	1.81591	1.95816	1.64433
MSTRG.5326	chr11:64008455-64011325	-	2871	0.585481	0.285492	0.332328	1.4425	0.555369	0.93046
MSTRG.5327	chr11:64008546-64011575	+	3030	18.3086	16.7271	15.0588	21.1983	22.3525	20.0537
MSTRG.5328	chr11:64011956-64020042	-	8087	13.8647	9.08968	13.0234	13.7503	14.4635	14.3609
MSTRG.5329	chr11:64011975-64015689	+	3715	3.57109	2.94897	3.11257	2.51728	2.11029	1.8199
MSTRG.5330	chr11:64019019-64035393	+	16375	10.3113	9.46021	9.56769	9.13184	8.74567	9.21776
MSTRG.5331	chr11:64032789-64033481	-	693	0	0	1.13115	0.305366	0	0
MSTRG.5339	chr11:64072563-64084215	+	11653	5.34759	8.85402	8.09347	6.77749	7.31477	6.67195
MSTRG.5340	chr11:64084163-64089193	-	5031	24.9488	20.0871	21.1605	33.4016	32.3745	29.7349
MSTRG.5343	chr11:64126654-64139686	+	13033	5.76491	6.06744	6.24376	6.45459	7.42021	5.89304
MSTRG.5344	chr11:64126657-64127705	-	1049	0	0	0	1.19266	0	0
MSTRG.5347	chr11:64532727-64532946	+	220	0	1.09203	0.157953	0.113688	0.021263	0
MSTRG.5346	chr11:64533493-64545941	-	12449	20.2124	19.8868	21.3878	18.5855	21.5501	19.5057
MSTRG.5348	chr11:64534711-64535646	+	936	0.26052	1.0878	0.058172	0.576284	0.3094	0.711133
MSTRG.5350	chr11:64547512-64548552	+	1041	1.4188	0.746984	0.84818	0.330438	0.316046	0.559746
MSTRG.5351	chr11:64567808-64570601	-	2794	2.94371	3.18402	3.24262	4.16632	4.20383	4.03441
MSTRG.5352	chr11:64571847-64577957	-	6111	7.3531	6.6423	6.29168	10.1362	11.4593	10.9276
MSTRG.5353	chr11:64571997-64572288	+	292	0.710685	0.943991	0.764519	0.835413	2.2895	1.43127
MSTRG.5354	chr11:64620203-64624135	-	3933	3.62498	4.26668	4.57138	7.60605	8.49196	5.35406
MSTRG.5358	chr11:64662019-64684681	-	22663	4.96048	5.67467	5.02054	4.90884	5.54524	5.06802
MSTRG.5359	chr11:64781159-64781454	+	296	0.926566	2.1768	1.46466	4.08158	2.73463	4.8982
MSTRG.5362	chr11:64808425-64812300	+	3876	16.6768	16.0139	12.8409	9.65293	9.18088	8.53166
MSTRG.5368	chr11:64856796-64879136	+	22341	2.98961	3.7396	3.71933	3.27939	3.59504	3.19357
MSTRG.5373	chr11:64888105-64889598	+	1494	1.59869	2.29504	2.60489	2.69206	3.48865	2.65774
MSTRG.5372	chr11:64894753-64901971	-	7219	16.6822	18.8605	18.0407	19.1411	24.3728	20.5185
MSTRG.5378	chr11:65029391-65120720	+	91330	6.79464	6.38496	6.37818	7.40167	7.31541	9.14431
MSTRG.5379	chr11:65132733-65150142	-	17410	1.65912	1.70918	1.93267	2.44764	2.0591	3.01679
MSTRG.5382	chr11:65154108-65179251	+	25144	4.18981	4.05431	3.66894	4.81167	7.34382	7.44589
MSTRG.5381	chr11:65184061-65189274	+	5214	0.910741	0.664208	1.05938	1.05946	1.40267	1.56017
MSTRG.5385	chr11:65190245-65193974	+	3730	7.14607	32.1744	10.6248	1.6401	1.37893	3.78921
MSTRG.5386	chr11:65190277-65191038	-	762	2.47459	2.89061	2.94607	0.139188	0.273689	1.26956
MSTRG.5387	chr11:65191396-65193040	-	1645	0.673666	0.958122	1.01205	0.047153	0.131518	0.308146
MSTRG.5383	chr11:65222784-65224081	+	1298	3.03804	2.85121	3.54551	13.7094	14.7161	15.7477
MSTRG.5384	chr11:65234616-65234888	+	273	0.335078	0.266416	0.544509	0.920229	1.10805	1.86587
MSTRG.5388	chr11:65245117-65246390	+	1274	0.084407	0.363488	0.2875	0.522987	1.12875	1.00332
MSTRG.5389	chr11:65265237-65273987	+	8751	38.8143	66.4371	77.1063	36.0953	113.404	77.9252
MSTRG.5391	chr11:65266526-65272186	-	5661	1.20316	1.62752	1.71734	1.70387	1.35048	2.40395
MSTRG.5396	chr11:65292592-65306146	+	13555	17.6317	18.5038	16.4777	14.2188	14.8509	13.6444
MSTRG.5397	chr11:65303776-65325430	-	21655	4.332	4.46494	3.81933	5.13614	4.82124	6.25078
MSTRG.5398	chr11:65306820-65308036	+	1217	0.258023	0.128844	0.027307	0.32684	1.21477	0.433607
MSTRG.5392	chr11:65333508-65335033	-	1526	2.38054	1.56916	2.0414	1.36147	0.914252	2.14594
MSTRG.5395	chr11:65337943-65338382	-	440	0	0	0	0.924998	1.26465	0.390643
MSTRG.5394	chr11:65337956-65341413	+	3458	9.0551	7.80036	9.53861	18.6608	20.9515	20.7177
MSTRG.5399	chr11:65342805-65343368	-	564	1.66735	0.578934	1.11525	2.38601	2.73493	1.67057
MSTRG.5400	chr11:65343517-65359842	+	16326	17.1471	14.7461	12.7594	12.9449	13.8053	14.5591
MSTRG.5401	chr11:65351852-65352982	-	1131	0.324768	0.560338	0.978287	1.27661	1.19019	1.12429
MSTRG.5402	chr11:65357227-65357988	-	762	0	1.17924	0	0.636279	0	0.284616
MSTRG.5406	chr11:65381858-65404776	+	22919	6.633	6.68262	6.66361	9.44542	9.62174	10.0166
MSTRG.5409	chr11:65420363-65421720	+	1358	0.079053	0.137456	0.084521	1.11649	0.94411	1.43782
MSTRG.5410	chr11:65426073-65430366	-	4294	8.76727	18.3517	12.3761	8.91436	14.0209	9.21978
MSTRG.5411	chr11:65430448-65439187	+	8740	1.15436	0.699916	1.24072	2.76534	2.82659	2.78735
MSTRG.5412	chr11:65469362-65548273	-	78912	4.44725	4.69524	5.26294	4.70077	4.64273	4.82969
MSTRG.5414	chr11:65481821-65488418	-	6598	9.69661	10.7747	10.2508	8.54872	11.4081	10.1421
MSTRG.5417	chr11:65540208-65541167	-	960	4.77285	4.46231	5.40878	2.57271	2.08998	2.52137
MSTRG.5430	chr11:65622712-65636863	-	14152	21.6222	22.9117	23.1525	30.6533	47.1443	38.3838
MSTRG.5431	chr11:65627093-65635124	+	8032	6.26979	6.50839	6.03555	5.38663	5.41917	6.15516
MSTRG.5420	chr11:65656115-65659106	+	2992	16.14	15.1346	0.161496	0.55028	1.03474	6.50491
MSTRG.5421	chr11:65660475-65667890	-	7416	55.9977	54.7755	59.3329	25.9573	32.5193	29.2268
MSTRG.5422	chr11:65660506-65668121	+	7616	1.38927	1.22173	0.569068	0.517794	0.83556	0.66491
MSTRG.5423	chr11:65678915-65689032	+	10118	13.9139	12.6908	13.0684	13.9134	15.6453	14.7574
MSTRG.5425	chr11:65686758-65689017	-	2260	3.40612	5.42643	4.01277	5.00831	6.52923	4.62995
MSTRG.5426	chr11:65729152-65731588	-	2437	6.90813	7.12028	4.4014	4.51311	4.24404	6.10743
MSTRG.5428	chr11:65734740-65735206	-	467	1.40332	1.0733	0.942109	1.10425	0.276796	0.801477
MSTRG.5433	chr11:65759793-65760596	-	804	1.19723	1.19646	1.28462	0.914755	1.11393	0.90902
MSTRG.5434	chr11:65766038-65769631	-	3594	12.1937	12.3152	12.785	16.5679	18.4877	16.9415
MSTRG.5432	chr11:65784183-65789023	-	4841	2.31387	1.91147	2.09772	0.670505	0.685359	0.877592
MSTRG.5437	chr11:65819855-65822630	-	2776	0.398727	0	0.901563	0.131513	1.50414	0.710254
MSTRG.5438	chr11:65824316-65829219	-	4904	0.854726	0.915283	0.645536	0.910965	1.22135	0.671198
MSTRG.5440	chr11:65835624-65836233	-	610	0.777171	1.52671	1.44887	0.676	1.93969	0.770762
MSTRG.5441	chr11:65997851-66016229	+	18379	7.9981	10.7024	7.44271	5.3934	5.46907	7.14738
MSTRG.5443	chr11:65998021-65999667	-	1647	0.39145	0	0.270594	0.6096	1.11133	0
MSTRG.5446	chr11:66022321-66023240	+	920	0.254362	0.683752	0.774693	0.502087	0.301471	1.71
MSTRG.5451	chr11:66036061-66044963	+	8903	42.6287	46.2807	48.4744	57.5148	60.0354	53.2463
MSTRG.5452	chr11:66036339-66036874	-	536	1.12329	0.523286	0.605092	0.17159	0.214907	0.613018
MSTRG.5455	chr11:66045707-66051664	+	5958	0.326075	0.269818	0.188535	2.70404	2.02137	1.74243
MSTRG.5456	chr11:66052052-66056599	-	4548	14.0541	13.6093	12.4485	13.3541	16.5764	13.4533
MSTRG.5457	chr11:66055563-66056498	+	936	0	0.170138	1.16063	0.520542	0.261939	0.203863
MSTRG.5463	chr11:66108759-66112560	+	3802	0.745103	0.774706	0.138302	1.58813	2.01323	0.659897
MSTRG.5467	chr11:66129993-66139937	-	9945	4.46733	5.59793	4.68556	4.65957	3.69663	4.99716
MSTRG.5459	chr11:66199530-66199830	+	301	0.139066	0.192793	0.345175	0.775198	1.13059	1.65614
MSTRG.5473	chr11:66205689-66206294	+	606	1.01317	0.381911	0.393006	1.22649	0.821277	0.165629
MSTRG.5477	chr11:66247909-66277128	+	29220	5.1666	5.5944	5.54963	6.2259	6.18611	5.86223
MSTRG.5469	chr11:66377050-66377349	+	300	0.090213	0.527434	1.36775	0.305519	0.209201	0.290202
MSTRG.5480	chr11:66384102-66435845	+	51744	8.11723	7.95416	8.36431	6.34606	6.09276	7.72735
MSTRG.5481	chr11:66400293-66405600	+	5308	3.61339	3.72605	4.35261	1.17919	0.912359	2.31113
MSTRG.5482	chr11:66432469-66445348	-	12880	5.57583	6.37403	5.94677	6.05692	5.91966	6.71856
MSTRG.5483	chr11:66440100-66446238	+	6139	1.23316	1.09148	1.31569	0.250575	0.129885	0.666211
MSTRG.5484	chr11:66449884-66496697	-	46814	4.36344	3.70578	3.34987	2.91189	3.24947	2.95308
MSTRG.5486	chr11:66490834-66493890	-	3057	0.95773	0.836325	0.994517	0.826247	0.672708	1.17951
MSTRG.5487	chr11:66512245-66610744	+	98500	4.03427	3.71209	3.89496	2.95556	3.1874	3.4271
MSTRG.5490	chr11:66599860-66600478	-	619	1.00648	0.783741	0.679613	0.344731	0.283387	1.31733
MSTRG.5491	chr11:66605670-66614850	-	9181	1.16846	0.903115	1.15194	1.27207	0.872743	1.65022
MSTRG.5494	chr11:66615588-66725847	-	110260	3.23017	4.12583	2.99459	9.45123	8.58118	9.3601
MSTRG.5495	chr11:66623936-66627946	+	4011	13.2631	21.1024	15.6231	10.4226	13.1338	12.0773
MSTRG.5496	chr11:66638895-66639526	+	632	0.079019	0	0	1.0769	0	0.281263
MSTRG.5492	chr11:66742748-66744475	+	1728	4.66062	4.84304	3.72391	49.2193	57.9218	47.864
MSTRG.5493	chr11:66742758-66743763	-	1006	0	0.123171	0	1.57658	0.822943	1.13697
MSTRG.5499	chr11:66824360-66837988	+	13629	17.8628	18.4221	17.9036	16.2741	17.8147	13.8349
MSTRG.5505	chr11:67033965-67034235	-	271	0.348869	1.22628	0.373025	0.314848	0.68922	0.086655
MSTRG.5506	chr11:67056873-67069955	+	13083	2.58968	2.85721	2.45555	2.50149	3.05607	3.47083
MSTRG.5507	chr11:67071097-67077014	+	5918	3.00308	3.50523	2.98605	4.59081	2.94189	3.36718
MSTRG.5508	chr11:67084791-67099288	+	14498	2.8232	2.53231	2.55561	1.73145	1.76632	1.99973
MSTRG.5509	chr11:67100207-67101565	+	1359	1.00967	0.486791	0.825341	1.12499	0.889633	1.25037
MSTRG.5520	chr11:67205547-67211267	-	5721	5.77948	7.47681	6.7398	8.24198	7.66781	6.67551
MSTRG.5521	chr11:67250520-67258562	+	8043	25.5971	25.6447	26.5787	23.9742	26.0312	18.2042
MSTRG.5524	chr11:67260915-67267879	-	6965	8.24735	7.75993	6.62296	8.15261	7.84004	6.74168
MSTRG.5523	chr11:67351177-67354123	-	2947	1.13694	1.13226	0.832705	0.765741	1.25791	0.771589
MSTRG.5529	chr11:67478728-67771593	-	292866	3.83362	2.57107	4.10558	2.75906	2.3022	2.70994
MSTRG.5551	chr11:67806483-67821161	+	14679	6.26696	7.09628	6.31178	4.72694	4.99682	5.01485
MSTRG.5552	chr11:67820982-67888911	-	67930	19.0279	22.2508	21.8703	16.6077	19.2851	15.6454
MSTRG.5555	chr11:67925047-67981068	-	56022	4.46575	3.34532	4.1703	3.23955	2.97279	3.6289
MSTRG.5554	chr11:68029077-68039415	-	10339	3.42149	5.16823	4.62965	4.19141	4.80437	4.91539
MSTRG.5560	chr11:68228216-68349960	+	121745	12.9475	10.662	9.99092	11.518	10.7265	10.014
MSTRG.5558	chr11:68451950-68455569	-	3620	1.16309	1.23921	0	3.06469	2.52108	1.6544
MSTRG.5566	chr11:68660363-68671270	-	10908	11.9519	12.9326	10.033	5.54987	6.00943	5.7397
MSTRG.5569	chr11:68771863-68778545	-	6683	0.427427	0.510514	0.666709	1.06115	0.890918	1.03791
MSTRG.5575	chr11:69061618-69187280	+	125663	3.02222	2.23891	2.47333	3.19049	2.70804	2.99075
MSTRG.5581	chr11:69455862-69456198	-	337	0.659066	0.948235	1.23008	1.06243	0.867541	1.13071
MSTRG.5582	chr11:69458685-69466113	-	7429	0.308091	1.20469	0.100953	0.546788	1.03361	0.669496
MSTRG.5577	chr11:70049366-70053496	+	4131	14.5233	13.6043	14.5907	22.7801	26.164	21.3443
MSTRG.5579	chr11:70088193-70089454	-	1262	1.28157	1.46897	1.60525	0.146509	0.277689	0.386081
MSTRG.5593	chr11:70115347-70116623	-	1277	2.00744	1.22029	1.17877	0.580517	0.657374	0.756364
MSTRG.5602	chr11:70231944-70234154	-	2211	0.385291	1.22565	0.409888	0.231258	0.35895	0.212014
MSTRG.5603	chr11:70244647-70282668	+	38022	27.3941	25.6763	25.639	21.8417	19.3367	23.4365
MSTRG.5604	chr11:70253403-70255991	-	2589	0.523819	0.235332	1.04978	0.766698	0.26384	1.17501
MSTRG.5605	chr11:70263140-70281233	-	18094	1.39926	1.76241	1.09766	0.911957	1.63508	1.55535
MSTRG.5584	chr11:70313920-70963732	-	649813	0.582101	1.10789	1.20343	1.33373	1.13976	1.28205
MSTRG.5607	chr11:71159667-71194032	+	34366	2.34137	2.19538	1.84264	1.24014	1.24386	1.44399
MSTRG.5610	chr11:71580285-71592663	-	12379	1.7616	1.43442	1.63473	0.391602	0.250603	0.54176
MSTRG.5613	chr11:71612680-71613248	-	569	0.326607	0.620081	1.12303	0.066213	0.102421	0.152
MSTRG.5628	chr11:71709587-71721381	+	11795	2.10396	2.39994	2.35067	1.02588	0.869531	1.77012
MSTRG.5629	chr11:71716332-71725082	-	8751	8.82833	8.07706	8.23349	6.36786	6.13196	5.87555
MSTRG.5620	chr11:71900602-71932830	+	32229	150.791	166.939	151.118	147.127	148.307	131.831
MSTRG.5621	chr11:71900738-71907344	-	6607	1.67628	2.50108	2.005	1.95585	2.59848	2.28557
MSTRG.5625	chr11:71936113-71950149	+	14037	28.0897	30.8081	30.5967	25.0452	23.1621	25.3763
MSTRG.5626	chr11:71946198-71948243	-	2046	0.541639	1.36484	0.679637	0.605451	0.325364	0.767874
MSTRG.5622	chr11:71988723-71992729	-	4007	0.58955	0.559403	0.739285	0.795452	0.508841	1.15816
MSTRG.5624	chr11:71996190-72002893	-	6704	2.64082	2.59566	2.56279	4.69483	4.47638	3.91186
[truncated: 8,367 more rows]
