# Supplementary material for: Transcriptome profiling of A549 non-small cell lung cancer cells in response to Trichinella spiralis muscle larvae excretory/secretory products
Source: Front Vet Sci. 2023 Jul 31;10:1208538. doi: 10.3389/fvets.2023.1208538 (PMC10433203; doi:10.3389/fvets.2023.1208538)
Supplement: Supplementary file 6 [file Table_6.XLSX]

## Sheet: novel_transcript
Column A: Transcript_id, The name of novel transcript identifier given by StringTie. Column B: Gene_id, The name of novel gene identifier of transcript given by StringTie. Column C: Locus, The genomic coordinates of novel transcript. Column D: Strand, The strand of novel transcript. Column E: Exons_Num, The number of exons of novel transcript. Column F: Length, The length of novel transcript. Col…
Novel Transcript Information						FPKM
Transcript_id	Gene_id	Locus	Strand	Exons_Num	Length	control-1	control-2	control-3	test-1	test-2	test-3
MSTRG.2.1	MSTRG.2	GL000191.1:29049-33237	+	3	2436	2.09609	0.168475	2.26867	0.104387	0.156318	3.04457
MSTRG.2.2	MSTRG.2	GL000191.1:29671-33237	+	3	3086	18.3288	0.343804	16.3957	20.0527	1.09717	23.0762
MSTRG.7.2	MSTRG.7	GL000191.1:34234-49602	-	4	8575	0.154718	0	2.5789	0.515123	0.147607	0.748216
MSTRG.7.1	MSTRG.7	GL000191.1:34234-49710	-	4	11347	0.908075	0.582541	0.372611	0.028462	1.11551	0
MSTRG.7.3	MSTRG.7	GL000191.1:36279-42139	-	3	2017	0.070904	2.87189	0.131556	0.086212	0.359498	0.264076
MSTRG.7.7	MSTRG.7	GL000191.1:36296-50699	-	4	9861	3.50935	2.83368	0	0.021987	0	9.65654
MSTRG.7.8	MSTRG.7	GL000191.1:36296-50780	-	4	9786	0	0.347019	0.804564	4.86792	0.465548	0.80201
MSTRG.7.9	MSTRG.7	GL000191.1:38912-52852	-	3	6865	0	0	0	4.05714	0.77378	0
MSTRG.1.1	MSTRG.1	GL000192.1:544678-545093	-	1	416	0.06419	0.278993	1.73098	0.885492	1.16101	1.15288
MSTRG.3.2	MSTRG.3	GL000193.1:73408-79976	-	4	1519	3.08285	2.86479	2.45074	0.970309	1.68914	1.36251
MSTRG.6.1	MSTRG.6	GL000194.1:25968-115086	-	4	1819	0.307389	0.35735	0.205987	0.1801	6.70042	0.19019
MSTRG.6.2	MSTRG.6	GL000194.1:53506-115065	-	4	2207	0.129302	0.200426	0.655247	0.434796	1.44836	0.690257
MSTRG.6.3	MSTRG.6	GL000194.1:53566-115065	-	5	852	1.19834	0.766852	0.733527	1.34576	0.203032	0.985166
MSTRG.6.5	MSTRG.6	GL000194.1:53600-115086	-	5	8697	1.05139	1.36929	0.903742	0.863169	0.4444	0.565086
MSTRG.6.7	MSTRG.6	GL000194.1:60643-115065	-	4	2078	1.53886	0.227423	1.53146	1.03361	1.01796	1.40877
MSTRG.6.8	MSTRG.6	GL000194.1:60822-115065	-	3	8446	4.44456	3.93058	5.06949	2.05143	1.27196	4.69875
MSTRG.6.9	MSTRG.6	GL000194.1:61492-115065	-	4	1217	1.71211	2.66546	3.36203	0.790208	1.79149	1.71611
MSTRG.8.1	MSTRG.8	GL000195.1:29244-32197	-	1	2954	0.930901	0.7207	1.12021	0.517128	0.296848	0.705974
MSTRG.9.1	MSTRG.9	GL000195.1:33654-34623	-	1	970	0.590386	0.648906	0.727523	0.557804	0.200132	1.44412
MSTRG.16.4	MSTRG.16	GL000195.1:42939-86663	-	3	2296	2.15761	1.9724	3.14707	14.6435	2.00653	1.82882
MSTRG.16.21	MSTRG.16	GL000195.1:44764-86653	-	3	1474	1.66249	2.09209	1.8501	0.511817	0.031032	1.97169
MSTRG.16.31	MSTRG.16	GL000195.1:83300-86700	-	3	945	3.52607	4.46908	3.60349	0.734055	1.35467	1.9146
MSTRG.12.1	MSTRG.12	GL000195.1:137880-149496	+	4	870	5.82876	5.03124	7.56708	1.75132	6.60167	1.58001
MSTRG.12.3	MSTRG.12	GL000195.1:137940-149496	+	4	799	8.34655	8.00133	7.85781	2.61939	1.5385	3.6318
MSTRG.12.2	MSTRG.12	GL000195.1:137940-149519	+	5	1046	7.34079	6.52911	6.08236	2.64919	0.828576	2.5017
MSTRG.12.8	MSTRG.12	GL000195.1:138079-149487	+	4	689	9.06952	10.4497	4.78023	3.21262	0	2.98604
MSTRG.12.9	MSTRG.12	GL000195.1:138079-149496	+	5	911	0.968721	0.896913	0.80419	0.528526	0.003208	1.00425
MSTRG.13.1	MSTRG.13	GL000195.1:171010-172995	+	1	1986	1.37096	1.30233	1.37773	0.345056	0.198895	0.84526
MSTRG.14.1	MSTRG.14	GL000195.1:173587-176886	+	1	3300	1.67708	1.30297	1.70609	0.463268	0.326409	1.16148
MSTRG.17.2	MSTRG.17	GL000205.1:33830-37283	+	2	1050	5.06019	4.09281	3.06114	1.95877	2.2539	1.92646
MSTRG.17.3	MSTRG.17	GL000205.1:33830-45241	+	4	656	4.50936	0	1.74261	1.20705	1.15228	1.71934
MSTRG.17.1	MSTRG.17	GL000205.1:33830-45247	+	4	673	2.76808	4.70901	3.42282	0.736078	0.755507	0.55876
MSTRG.17.4	MSTRG.17	GL000205.1:33842-37305	+	3	1005	3.58899	4.02202	3.89484	1.25526	2.32054	3.13058
MSTRG.17.6	MSTRG.17	GL000205.1:33844-61389	+	4	702	3.09324	0	1.14054	0.865142	0.240301	2.2298
MSTRG.17.7	MSTRG.17	GL000205.1:33867-61394	+	5	2293	0.937058	6.32573	5.29059	0.249702	0.127459	0.419424
MSTRG.17.10	MSTRG.17	GL000205.1:51790-61394	+	3	1859	0	0.014683	0.054828	0.730372	1.01999	0.705483
MSTRG.10.1	MSTRG.10	GL000205.1:65979-84962	+	1	18984	1.7533	1.66136	1.72116	0.59045	0.23431	1.4479
MSTRG.11.1	MSTRG.11	GL000206.1:33002-38910	+	2	1335	1.35665	1.33188	1.09982	1.14652	0.850147	1.23885
MSTRG.15.1	MSTRG.15	GL000209.1:86528-97793	+	8	3397	5.75418	5.59499	6.11008	6.93889	6.09463	6.00494
MSTRG.18.2	MSTRG.18	GL000212.1:24070-66593	+	9	5925	1.42702	1.18275	1.21055	2.18874	2.43284	2.96031
MSTRG.23.1	MSTRG.23	GL000212.1:127581-127823	+	1	243	2.86678	5.55669	5.72347	3.65035	4.38422	4.15433
MSTRG.24.1	MSTRG.24	GL000212.1:128310-128511	+	1	202	0.45196	0.772784	1.33495	0.67787	0.852479	0.432884
MSTRG.25.1	MSTRG.25	GL000218.1:46032-92264	-	4	3060	6.67767	5.64597	5.41734	2.00035	1.90126	2.86025
MSTRG.25.2	MSTRG.25	GL000218.1:81251-92175	-	3	5313	1.08976	1.1727	1.52308	0.423344	0.39654	0.942851
MSTRG.27.1	MSTRG.27	GL000219.1:73987-99664	-	7	3234	1.87513	3.75722	1.83887	2.88431	2.60313	0.932719
MSTRG.27.2	MSTRG.27	GL000219.1:74053-99661	-	7	2875	1.47286	0	3.2403	0	0	1.65985
MSTRG.27.3	MSTRG.27	GL000219.1:77082-99664	-	7	1341	8.30944	4.07318	3.05788	2.86875	2.66989	4.16832
MSTRG.26.1	MSTRG.26	GL000220.1:42689-64395	+	2	21646	1.89093	1.69432	1.84555	0.366578	0.186398	0.767712
MSTRG.28.1	MSTRG.28	GL000220.1:72790-75867	+	1	3078	1.00659	1.07986	0.854764	0.569942	0.551985	1.454
MSTRG.38.1	MSTRG.38	GL000220.1:103733-104525	+	2	341	1.96952	2.20229	0.862457	0.588125	1.12801	1.08131
MSTRG.39.1	MSTRG.39	GL000220.1:105865-154896	+	3	4100	2.28744	63.0528	643.47	5.00312	305.48	682.403
MSTRG.39.3	MSTRG.39	GL000220.1:109089-154879	+	2	2626	0.065744	0	0	956.962	1036.52	0
MSTRG.39.2	MSTRG.39	GL000220.1:109089-154898	+	2	2071	0	0	340.486	0	0	452.96
MSTRG.39.4	MSTRG.39	GL000220.1:109103-154898	+	2	2917	218.996	1484.25	0	1190.82	0	0
MSTRG.39.5	MSTRG.39	GL000220.1:109138-154896	+	2	1992	100.934	0	0	0	0	0
MSTRG.37.2	MSTRG.37	GL000220.1:113045-160341	+	2	3358	9.39029	0	0.210176	0	0	0
MSTRG.37.3	MSTRG.37	GL000220.1:113254-161802	+	9	7500	108.83	260.698	314.113	317.449	266.91	242.751
MSTRG.37.4	MSTRG.37	GL000220.1:113255-161801	+	2	4755	0	27.6454	15.2374	0	0	0.547332
MSTRG.37.5	MSTRG.37	GL000220.1:113255-161801	+	3	3849	0	0	0	0	0	150.128
MSTRG.37.6	MSTRG.37	GL000220.1:113255-161801	+	2	5024	0	0	0	0	0	1.90262
MSTRG.37.9	MSTRG.37	GL000220.1:113263-122354	+	3	3549	6.45348	23.5479	12.0854	214.983	4.35018	18.477
MSTRG.37.10	MSTRG.37	GL000220.1:113263-161802	+	2	4637	10.7478	21.3628	6.31444	30.8062	4.86574	21.0509
MSTRG.37.7	MSTRG.37	GL000220.1:113263-161802	+	2	4569	22.6606	63.4686	11.9842	90.7988	46.9559	62.8936
MSTRG.37.8	MSTRG.37	GL000220.1:113263-161802	+	4	4187	4.43237	10.3045	3.66805	144.349	7.16739	36.0103
MSTRG.37.12	MSTRG.37	GL000220.1:113297-160390	+	2	3767	0	0	0	0	113.247	0
MSTRG.37.11	MSTRG.37	GL000220.1:113297-161802	+	4	4373	0	0	16.3011	0	88.7749	0
MSTRG.41.1	MSTRG.41	GL000220.1:113321-161795	-	2	4779	4.49666	11.9387	7.42224	12.6323	12.61	9.01831
MSTRG.43.1	MSTRG.43	GL000220.1:138624-148127	-	3	9264	2.55603	3.89389	2.48442	1.64307	1.26679	2.43682
MSTRG.37.13	MSTRG.37	GL000220.1:157220-161802	+	2	3740	384.069	242.427	269.898	0	190.002	0
MSTRG.29.1	MSTRG.29	GL000222.1:11827-23696	+	4	937	2.37279	1.86988	1.94964	0.891929	0.478853	1.5173
MSTRG.32.1	MSTRG.32	GL000223.1:1-1499	+	1	1499	1.1877	0.811745	1.18374	0.612925	0.462564	1.15878
MSTRG.31.1	MSTRG.31	GL000223.1:1-5804	-	3	675	3.03838	1.58445	2.10381	1.61689	0	1.83837
MSTRG.31.2	MSTRG.31	GL000223.1:6-25615	-	4	844	0	0	0	0.135177	2.06345	0
MSTRG.30.1	MSTRG.30	GL000223.1:50070-50525	+	1	456	0.841595	0.207575	1.17182	0.488439	0.918402	1.14609
MSTRG.33.1	MSTRG.33	GL000223.1:79019-119661	-	3	4405	0	0	1.96569	0.058828	1.59851	0
MSTRG.34.1	MSTRG.34	GL000223.1:149783-164088	+	3	1165	0	2.48457	0	0	0.016961	0.942373
MSTRG.34.2	MSTRG.34	GL000223.1:150028-165098	+	3	2411	0.800096	0.056301	0.948979	1.71921	1.65376	1.58524
MSTRG.35.1	MSTRG.35	GL000234.1:27154-27406	-	1	253	1.46552	1.08454	0.103359	0.093228	0.328184	0.068672
MSTRG.36.1	MSTRG.36	GL000234.1:35645-35872	-	1	228	1.15457	0.700779	0.441836	0.838019	0.1231	0.745268
MSTRG.47.1	MSTRG.47	GL000241.1:12849-36896	-	8	4021	0.817573	0.94344	1.86337	0.786394	0.251085	0.426054
MSTRG.47.2	MSTRG.47	GL000241.1:12849-36896	-	9	4121	3.72049	2.87281	3.35198	1.94532	0.834187	1.57968
MSTRG.47.3	MSTRG.47	GL000241.1:13786-36896	-	9	1911	7.87288	5.72812	6.64428	5.50218	7.46579	6.37197
MSTRG.47.5	MSTRG.47	GL000241.1:16586-36896	-	8	1419	4.52384	6.94081	5.10791	5.96066	7.31285	5.57947
MSTRG.47.6	MSTRG.47	GL000241.1:16586-36896	-	5	1081	3.25425	3.70889	4.20098	3.09482	5.17882	3.2003
MSTRG.45.1	MSTRG.45	GL000242.1:23611-26484	+	1	2874	2.36278	2.30308	2.26752	1.74703	1.79374	1.6362
MSTRG.46.1	MSTRG.46	GL000247.1:54-670	-	1	617	1.33624	0.968431	0.752501	0.929704	0.513488	0.526837
MSTRG.48.1	MSTRG.48	GL000247.1:15384-18436	-	1	3053	1.6134	1.50041	1.62135	1.14718	1.03823	1.30336
MSTRG.50.6	MSTRG.50	chr1:14360-18816	-	8	2756	0.238953	2.69882	0.552631	0.367714	0.590746	0.658684
MSTRG.50.7	MSTRG.50	chr1:14360-26936	-	10	9954	2.70066	1.89268	2.58016	2.24156	1.24659	3.69753
MSTRG.50.3	MSTRG.50	chr1:14360-29358	-	9	2277	0.223056	5.09314	0.075038	0.073936	0.778128	0.022928
MSTRG.50.5	MSTRG.50	chr1:14360-29440	-	9	1885	0.886809	1.01652	0.921398	1.63675	0.835959	2.71543
MSTRG.50.8	MSTRG.50	chr1:14366-29358	-	8	1364	1.56865	2.75784	1.36195	0.438069	0.196518	0.40639
MSTRG.50.9	MSTRG.50	chr1:14399-25233	-	10	2387	1.49103	0.303622	1.12732	0.345106	4.12521	0.944932
MSTRG.55.1	MSTRG.55	chr1:137490-139942	+	1	2453	2.55027	1.79639	2.22429	0.750435	0.309882	1.87333
MSTRG.60.1	MSTRG.60	chr1:564654-565453	-	1	800	5.24286	11.9675	11.1822	5.69515	7.15213	5.63838
MSTRG.61.1	MSTRG.61	chr1:565007-565869	+	2	491	257.887	0	0	0	0	464.006
MSTRG.62.1	MSTRG.62	chr1:566132-567996	+	2	1804	4.61765	0.451716	0.57	0.18967	0.226895	67.1616
MSTRG.62.2	MSTRG.62	chr1:566138-567996	+	2	1786	6.9249	18.2693	23.5005	7.72386	9.5146	44.627
MSTRG.63.1	MSTRG.63	chr1:567101-568070	-	1	970	1.14906	2.16013	1.28714	2.42118	2.88604	2.02136
MSTRG.66.1	MSTRG.66	chr1:569226-569568	-	1	343	12.3045	23.7452	27.664	21.8362	19.2063	17.5189
MSTRG.80.1	MSTRG.80	chr1:859308-879961	+	13	3352	1.37304	0.069958	0.901082	0.361358	0.960767	2.64665
MSTRG.82.1	MSTRG.82	chr1:879584-894636	-	19	2771	0.607957	0.013564	24.8004	0.949981	2.71597	26.5961
MSTRG.83.1	MSTRG.83	chr1:880072-880992	+	3	294	1.12552	1.66525	0.558744	0.838883	0.991775	0.979939
MSTRG.84.1	MSTRG.84	chr1:892331-894623	+	4	432	0.392098	0.559485	0.533009	0.289964	1.24569	0.510453
MSTRG.79.4	MSTRG.79	chr1:898107-901092	+	7	1676	1.89941	1.94294	2.01233	2.8371	2.08618	2.17809
MSTRG.86.1	MSTRG.86	chr1:935098-935491	+	2	316	1.33102	1.72684	2.42927	0.663258	1.55864	0.9383
MSTRG.89.1	MSTRG.89	chr1:943843-944848	+	2	704	1.36432	0.933768	1.59573	0.436675	0.336541	1.22557
MSTRG.92.1	MSTRG.92	chr1:990430-990635	-	1	206	1.6361	0.955366	0	0.45031	0.80423	0.275262
MSTRG.93.1	MSTRG.93	chr1:993848-1001654	+	4	744	0.017162	0.011423	1.6929	0.863676	3.88265	0.380871
MSTRG.93.3	MSTRG.93	chr1:995114-1001654	+	4	798	0.177606	1.33241	0.118148	5.09079	0.313597	1.91217
MSTRG.93.2	MSTRG.93	chr1:995114-1001836	+	4	916	1.72787	1.69681	1.61119	2.3667	3.70699	2.66846
MSTRG.95.1	MSTRG.95	chr1:1001074-1004439	-	2	639	1.11729	0.85608	1.30487	0.546247	0.136649	1.3753
MSTRG.96.8	MSTRG.96	chr1:1017526-1051736	-	10	1967	2.13352	2.58279	0.203174	0.205644	0	0.233651
MSTRG.97.4	MSTRG.97	chr1:1152312-1167348	-	7	2284	20.2786	15.9185	23.2572	22.4046	29.7105	22.0334
MSTRG.98.1	MSTRG.98	chr1:1152725-1154269	+	3	641	0.351283	0.917686	0.536092	0.237327	1.02866	0.304404
MSTRG.123.3	MSTRG.123	chr1:1228250-1238640	-	21	2977	0	1.3278	0.551137	1.06872	1.02247	0.862566
MSTRG.124.2	MSTRG.124	chr1:1243975-1246449	+	6	851	0.538579	3.53109	0.960107	0.38019	1.35303	0.483218
MSTRG.126.1	MSTRG.126	chr1:1251202-1253967	+	2	1064	1.05883	1.70601	0.880268	1.83377	1.98428	1.35833
MSTRG.106.1	MSTRG.106	chr1:1270827-1271247	+	1	421	0.595279	1.24791	0.69284	0.857765	1.03658	0.399078
MSTRG.107.1	MSTRG.107	chr1:1271562-1273558	+	2	536	0.436592	0.711308	1.0856	1.2794	1.11199	0.717741
MSTRG.108.1	MSTRG.108	chr1:1273749-1274760	+	3	219	0.752739	1.29222	0.125016	0.691027	0.571726	0.989485
MSTRG.109.1	MSTRG.109	chr1:1275817-1284291	+	6	518	1.9408	2.12742	0.607145	1.69455	1.49605	1.22337
MSTRG.101.1	MSTRG.101	chr1:1286802-1290601	+	1	3800	0.434543	0.356837	0.499398	0.50027	0.295746	1.14312
MSTRG.103.1	MSTRG.103	chr1:1292463-1297362	+	1	4900	0.429968	0.423623	0.559316	0.787333	0.524739	1.71986
MSTRG.111.1	MSTRG.111	chr1:1309121-1309729	+	2	512	0.929972	1.75943	0.734918	1.39749	1.58933	0.720807
MSTRG.112.1	MSTRG.112	chr1:1310364-1310588	+	1	225	0.085001	0.825324	0.557709	0.552673	1.63982	0.574465
MSTRG.113.9	MSTRG.113	chr1:1322093-1333667	-	9	3601	14.4485	1.03577	6.95455	7.21701	2.03469	5.37316
MSTRG.116.1	MSTRG.116	chr1:1342290-1345998	+	2	3598	0.103785	0.098213	0	1.16502	0.005356	1.34481
MSTRG.116.2	MSTRG.116	chr1:1342714-1345998	+	2	3155	3.11806	3.41889	3.66768	0	0.604311	0
MSTRG.120.1	MSTRG.120	chr1:1385069-1431581	+	13	2800	0	0	0	0	1.0824	0
MSTRG.120.4	MSTRG.120	chr1:1387789-1392559	+	5	385	0	0	2.48671	0	0	0
MSTRG.121.1	MSTRG.121	chr1:1406593-1407061	-	1	469	3.09611	2.71057	2.83911	1.19215	1.89546	1.07389
MSTRG.122.1	MSTRG.122	chr1:1412693-1417984	-	6	496	0.881833	1.13812	0.504748	0.667403	0.259746	0.289557
MSTRG.120.8	MSTRG.120	chr1:1414429-1444841	+	13	1487	6.73223	6.47109	0.076189	0.026044	0.195825	0.127011
MSTRG.120.10	MSTRG.120	chr1:1414429-1470065	+	13	1990	3.08191	4.21793	7.44726	7.86082	1.44156	3.23466
MSTRG.120.20	MSTRG.120	chr1:1459653-1469517	+	5	628	1.43228	0.439633	0.263468	1.14046	1.34821	1.90716
MSTRG.142.4	MSTRG.142	chr1:1571100-1653094	-	19	2256	0	0	16.3724	0.34343	0	15.9535
MSTRG.142.6	MSTRG.142	chr1:1571100-1653094	-	18	2056	2.40819	1.29661	1.23519	0.827066	1.13378	2.17019
MSTRG.142.3	MSTRG.142	chr1:1571100-1654270	-	20	2373	5.89623	3.2412	2.05458	7.61167	7.54234	5.88278
MSTRG.142.5	MSTRG.142	chr1:1571100-1655763	-	21	2410	7.62362	5.24138	2.18404	7.86202	5.47628	7.82272
MSTRG.142.14	MSTRG.142	chr1:1577133-1590433	-	7	823	2.67614	2.82151	2.69643	3.86977	4.41925	4.17126
MSTRG.142.13	MSTRG.142	chr1:1577133-1653094	-	6	620	0	0	0	0	0	1.71582
MSTRG.142.15	MSTRG.142	chr1:1577133-1653094	-	9	892	0	0	0	2.08388	0	0
MSTRG.142.17	MSTRG.142	chr1:1580981-1590433	-	4	728	1.89565	0.777894	0.796103	0.785957	1.26831	2.74705
MSTRG.142.18	MSTRG.142	chr1:1580981-1590433	-	4	858	1.75947	0.668287	1.58032	0.994412	2.83155	2.11918
MSTRG.142.19	MSTRG.142	chr1:1580990-1590433	-	4	814	1.61135	1.32198	1.62943	1.4277	2.99284	2.41817
MSTRG.142.20	MSTRG.142	chr1:1580990-1590433	-	5	766	0.908296	0.551904	0.830362	1.3336	1.07932	1.29719
MSTRG.142.21	MSTRG.142	chr1:1581397-1590433	-	5	489	1.58512	0.929178	1.29954	2.10144	1.84158	1.71874
MSTRG.142.24	MSTRG.142	chr1:1592939-1624148	-	9	5908	3.32519	1.79315	3.62182	3.87325	3.20019	0.025127
MSTRG.142.25	MSTRG.142	chr1:1592939-1624148	-	10	6326	2.36285	1.83665	4.55436	2.10096	4.96009	0.057769
MSTRG.142.27	MSTRG.142	chr1:1592939-1624148	-	7	6078	2.5963	1.5077	1.04799	1.48444	0.282396	0.00449
MSTRG.142.26	MSTRG.142	chr1:1592939-1677358	-	9	9234	1.34684	1.30011	0.76851	0.581126	0.495767	0.808188
MSTRG.142.28	MSTRG.142	chr1:1592939-1677358	-	8	6204	0.185481	0.428678	1.53478	0.257407	0.054703	0.101128
MSTRG.142.23	MSTRG.142	chr1:1592939-1677476	-	7	3485	0.000381	4.49987	1.99252	3.14815	0.1913	0.091538
MSTRG.142.30	MSTRG.142	chr1:1592940-1665025	-	3	4705	0.791011	0.890852	1.78956	0	0	5.67017
MSTRG.145.1	MSTRG.145	chr1:1623127-1625720	+	1	2594	1.28566	1.13335	1.13264	0.406461	0.395713	0.475991
MSTRG.146.1	MSTRG.146	chr1:1630063-1710229	-	13	3097	10.5289	10.2222	6.3782	7.91218	4.10829	1.76822
MSTRG.142.51	MSTRG.142	chr1:1635538-1653094	-	14	1549	1.89406	2.29868	0.767443	2.81973	2.00506	1.92666
MSTRG.142.56	MSTRG.142	chr1:1636047-1653094	-	12	1467	1.24865	2.15383	2.39307	2.67666	1.04804	2.16939
MSTRG.142.57	MSTRG.142	chr1:1636047-1653094	-	12	1351	1.95643	2.21928	0.716442	2.43636	1.6771	2.18435
MSTRG.148.1	MSTRG.148	chr1:1640500-1647900	+	4	449	1.42861	2.26141	1.31191	1.75082	1.97809	2.43104
MSTRG.142.64	MSTRG.142	chr1:1658824-1664825	-	3	5530	4.31291	0	4.79715	0.051977	2.46932	3.09729
MSTRG.142.65	MSTRG.142	chr1:1658824-1664825	-	2	2747	0	0	2.30327	0	0	0
MSTRG.150.1	MSTRG.150	chr1:1676257-1677109	+	1	853	1.49506	0.787385	0.7159	0.378677	0.179598	0.280975
MSTRG.151.1	MSTRG.151	chr1:1678701-1679067	+	1	367	0.988659	0.475419	1.29332	0.404737	0.287316	0.162137
MSTRG.146.5	MSTRG.146	chr1:1682678-1709858	-	9	2833	3.35296	2.14589	2.98055	2.60096	4.31806	4.82263
MSTRG.146.6	MSTRG.146	chr1:1682678-1711401	-	10	2863	0.535749	0.627662	0.576512	1.04378	1.12354	1.78427
MSTRG.130.3	MSTRG.130	chr1:1716725-1822405	-	13	2958	0	0	0	0	43.8256	0
MSTRG.130.9	MSTRG.130	chr1:1735965-1822405	-	8	681	1.54348	1.1819	0.764918	0.815971	1.96927	8.69625
MSTRG.131.1	MSTRG.131	chr1:1822265-1822494	+	1	230	1.12649	1.02857	1.46202	1.17851	2.13127	2.7468
MSTRG.135.3	MSTRG.135	chr1:1981942-2116832	+	18	2265	0	0	0	0	4.04495	0
MSTRG.135.15	MSTRG.135	chr1:2036155-2116832	+	15	2009	13.3156	19.5265	12.5507	4.14111	1.92033	2.48818
MSTRG.138.1	MSTRG.138	chr1:2115900-2126213	-	5	4492	1.37017	1.51533	1.99006	2.19375	2.96752	2.7574
MSTRG.133.1	MSTRG.133	chr1:2160134-2241558	+	7	5619	3.63596	3.72952	2.66701	4.89854	4.02466	5.63984
MSTRG.134.1	MSTRG.134	chr1:2235300-2235537	-	1	238	0	0.243826	0	0.377792	1.17272	0
MSTRG.157.1	MSTRG.157	chr1:2297352-2298049	-	1	698	1.11087	1.16588	0.661934	0.434532	0.107227	0.080417
MSTRG.158.1	MSTRG.158	chr1:2299354-2300322	-	1	969	1.44956	0.842412	0.853607	0.220215	0.179822	0.175357
MSTRG.159.1	MSTRG.159	chr1:2300796-2302533	-	1	1738	1.17246	0.928872	1.01162	0.166133	0.097229	0.368883
MSTRG.152.6	MSTRG.152	chr1:2303115-2319755	-	7	806	1.85151	0.624448	1.26992	0.433144	0.000821	0.341996
MSTRG.161.10	MSTRG.161	chr1:2323329-2333755	+	8	790	0	0.421985	2.13287	2.31469	0	2.33082
MSTRG.161.11	MSTRG.161	chr1:2323329-2333755	+	7	805	0	1.53563	0	2.62402	3.1603	1.13848
MSTRG.161.7	MSTRG.161	chr1:2323329-2334655	+	8	845	11.5024	19.6401	15.7198	13.2229	12.784	12.5185
MSTRG.161.8	MSTRG.161	chr1:2323329-2334655	+	8	1602	6.00271	1.57521	1.32843	1.44348	5.00502	1.89672
MSTRG.161.9	MSTRG.161	chr1:2323329-2334655	+	9	1415	5.62819	0	0	1.25122	0	0
MSTRG.161.6	MSTRG.161	chr1:2323329-2334666	+	8	918	2.32449	2.18835	3.1914	0.943734	1.20739	1.56268
MSTRG.161.13	MSTRG.161	chr1:2323681-2333755	+	7	1104	0.942158	1.63922	2.73566	2.75735	3.87814	3.18433
MSTRG.162.1	MSTRG.162	chr1:2334777-2335051	-	1	275	1.1731	0.813132	1.09578	0.753509	1.67195	0.836588
MSTRG.163.3	MSTRG.163	chr1:2336277-2343974	-	6	1938	3.92202	4.40079	4.05907	3.15193	2.85592	2.74338
MSTRG.165.3	MSTRG.165	chr1:2440234-2458036	-	19	2350	0.86745	2.29196	1.73626	1.01293	3.36615	1.68935
MSTRG.168.4	MSTRG.168	chr1:2487241-2495268	+	9	1939	0.744886	0.961004	1.30286	0.438437	0.744109	0.488971
MSTRG.176.2	MSTRG.176	chr1:3371112-3397677	+	15	2956	0	0	0	12.9935	1.17279	0
MSTRG.176.3	MSTRG.176	chr1:3371223-3397677	+	15	2861	1.49337	2.10559	1.30886	0.970871	2.03036	1.98618
MSTRG.177.1	MSTRG.177	chr1:3381895-3386618	-	4	2314	0.814454	1.0276	0.87877	0.713514	0.534344	1.14834
MSTRG.178.1	MSTRG.178	chr1:3400787-3404191	+	2	3379	3.04251	3.08821	3.06284	1.11837	1.19042	1.59536
MSTRG.179.1	MSTRG.179	chr1:3404514-3414285	-	9	3986	4.50521	8.00066	8.35727	3.93484	2.94735	5.61786
MSTRG.189.8	MSTRG.189	chr1:3654639-3663587	-	5	2249	0.832873	1.09786	1.45693	1.41454	1.82492	0.952264
MSTRG.184.1	MSTRG.184	chr1:3703454-3703800	+	1	347	0.256341	0.583093	0.20332	0.960294	1.27617	0.94746
MSTRG.195.3	MSTRG.195	chr1:3728654-3773758	-	22	5678	0	0	1.20054	0	0	0
MSTRG.195.2	MSTRG.195	chr1:3728654-3773762	-	23	5856	3.31106	1.76985	0	1.43301	0	2.08948
MSTRG.197.1	MSTRG.197	chr1:3777660-3779446	+	1	1787	0.490696	0.470869	0.456681	0.580847	0.528225	1.42546
MSTRG.192.1	MSTRG.192	chr1:5106946-5107330	+	1	385	1.03588	1.34929	1.49127	3.1069	2.51589	5.0335
MSTRG.191.1	MSTRG.191	chr1:5175511-5176167	+	1	657	0.740387	1.02257	0.960605	2.38924	1.17926	7.39889
MSTRG.201.11	MSTRG.201	chr1:6086380-6146420	+	7	665	2.6361	0	0.870211	4.2963	2.2903	2.86333
MSTRG.204.1	MSTRG.204	chr1:6246197-6259638	+	4	927	1.52085	1.96118	2.4255	1.45932	2.098	1.31555
MSTRG.203.4	MSTRG.203	chr1:6246675-6259672	-	4	377	5.2235	4.68433	6.61674	10.1107	11.1629	9.46575
MSTRG.203.5	MSTRG.203	chr1:6246675-6263558	-	5	826	0.549278	37.0832	0.292869	0	37.1482	21.2733
MSTRG.203.8	MSTRG.203	chr1:6246783-6259613	-	4	410	29.4168	38.4685	12.3646	9.80472	26.7975	6.06552
MSTRG.203.9	MSTRG.203	chr1:6246783-6259613	-	4	1098	44.9249	42.483	32.0153	25.4089	31.7961	32.3665
MSTRG.203.10	MSTRG.203	chr1:6246783-6266024	-	5	797	4.47454	0.768073	0.134113	0	0	0
MSTRG.205.9	MSTRG.205	chr1:6271095-6281359	+	7	2942	1.70116	1.88939	1.65942	0.648152	0.727503	0.99173
MSTRG.206.2	MSTRG.206	chr1:6281253-6296000	-	7	3606	0.42867	2.12231	0.673785	0	0.569607	0.439626
MSTRG.206.7	MSTRG.206	chr1:6281258-6296000	-	6	3489	13.1795	4.45117	12.4822	9.20199	9.76658	15.6683
MSTRG.206.10	MSTRG.206	chr1:6282352-6290306	-	2	948	0	0	0	0	3.79056	0
MSTRG.207.1	MSTRG.207	chr1:6283498-6285010	+	1	1513	1.94546	1.31301	1.67638	0.50451	0.395097	0.818708
MSTRG.198.2	MSTRG.198	chr1:6307407-6321035	-	4	6812	0.973155	0.311437	0.891221	1.91147	1.89609	1.72891
MSTRG.198.3	MSTRG.198	chr1:6307409-6321132	-	4	6765	0.396408	0.274873	0.47949	0.450005	0.045024	1.9543
MSTRG.210.1	MSTRG.210	chr1:6324573-6341337	+	2	359	0.24727	0.597009	0.430202	0.985959	1.1271	0.781772
MSTRG.211.1	MSTRG.211	chr1:6354982-6453422	+	7	734	0.410161	1.06627	0.614021	0.861377	1.07571	0.81989
MSTRG.216.1	MSTRG.216	chr1:6466784-6467077	-	1	294	0.162016	0	0	0.03446	0.517102	1.25074
MSTRG.217.4	MSTRG.217	chr1:6475292-6484595	-	5	4244	5.1569	4.112	0	0	0	0
MSTRG.220.1	MSTRG.220	chr1:6491565-6614595	-	13	4543	0	0	2.21441	0.000382	1.77721	0
MSTRG.220.3	MSTRG.220	chr1:6581407-6605077	-	9	2873	2.0776	0	1.78961	2.97331	3.15059	0
MSTRG.213.1	MSTRG.213	chr1:6640061-6649220	+	11	2133	3.62952	2.44069	3.02208	5.20942	5.13461	5.7271
MSTRG.225.7	MSTRG.225	chr1:6685290-6693428	+	5	882	3.55077	2.6733	2.73906	1.8249	3.72499	1.50387
MSTRG.229.4	MSTRG.229	chr1:6845540-6947847	+	6	610	0.430925	0.50997	1.57394	1.19916	0.498054	1.45554
MSTRG.236.1	MSTRG.236	chr1:7547449-7551373	-	1	3925	0.222764	0.147997	0.157796	0.578633	0.603444	1.31258
MSTRG.243.1	MSTRG.243	chr1:7975837-8000916	-	9	5679	0	0.07153	0.064787	1.64918	0.15438	0.156186
MSTRG.250.1	MSTRG.250	chr1:8075571-8086358	+	2	323	0.454697	0	0	0.31317	1.90804	0.505383
MSTRG.255.7	MSTRG.255	chr1:8414686-8483479	-	13	4212	0.220698	0.259622	0.006167	2.38413	4.86751	4.54403
MSTRG.256.1	MSTRG.256	chr1:8419828-8420046	+	1	219	0.245512	0.450466	0.634695	0.276122	1.21484	1.6721
MSTRG.255.19	MSTRG.255	chr1:8616535-8877524	-	5	1048	3.72393	2.4605	0.906833	0.749991	0.978318	0.945237
MSTRG.265.1	MSTRG.265	chr1:8877886-8938767	+	13	1829	1.76619	3.39621	1.97294	2.51559	4.21833	1.93162
MSTRG.251.2	MSTRG.251	chr1:9160400-9189149	-	4	3683	0	0.313737	1.73915	0	0	0.70426
MSTRG.251.3	MSTRG.251	chr1:9160411-9189162	-	4	3630	1.5792	0	0	0.970685	1.43126	1.02759
MSTRG.252.1	MSTRG.252	chr1:9294821-9331396	+	5	9049	0.00025	0	1.93744	0	0	0
MSTRG.253.3	MSTRG.253	chr1:9374567-9429486	+	3	2845	0	0	0	10.0313	0	0.001944
MSTRG.254.1	MSTRG.254	chr1:9416128-9416423	-	1	296	0	0.193435	0	0.273817	1.14837	0.183182
MSTRG.270.1	MSTRG.270	chr1:9599541-9642814	+	6	1330	2.67276	2.48633	1.32227	5.77128	4.77022	4.04155
MSTRG.273.1	MSTRG.273	chr1:9648980-9674907	+	9	3404	0	1.29516	0	1.36221	0.293185	1.65575
MSTRG.274.1	MSTRG.274	chr1:9676348-9680417	+	1	4070	0.578651	0.659819	0.754318	1.34481	1.28696	1.36179
MSTRG.272.1	MSTRG.272	chr1:9680874-9682366	+	1	1493	0.297287	0.606218	0.549901	0.98373	1.58158	1.08518
MSTRG.277.4	MSTRG.277	chr1:9748234-9788977	+	24	5423	1.60197	0	0	0	0	0
MSTRG.277.6	MSTRG.277	chr1:9749614-9788977	+	24	5311	2.86022	0.009215	4.79413	5.41674	0.010312	0.004386
MSTRG.281.2	MSTRG.281	chr1:9789086-9884042	-	18	4563	0	0	0	4.66856	0	0
MSTRG.282.1	MSTRG.282	chr1:9790530-9793061	+	2	2032	0.669763	0.870649	0.300393	1.14729	1.58324	1.27216
MSTRG.281.6	MSTRG.281	chr1:9809546-9884042	-	7	1017	0	1.83343	0	0	0	0
MSTRG.286.2	MSTRG.286	chr1:9986354-10003465	-	9	4334	5.96685	6.08742	5.84641	6.17264	6.1368	5.5509
MSTRG.286.3	MSTRG.286	chr1:9986361-10003387	-	9	3575	1.44918	2.39493	1.2698	1.45595	0.741686	0.815204
MSTRG.286.7	MSTRG.286	chr1:9990319-10001489	-	7	984	1.04778	0.959545	0.189942	0.911878	0.670356	0.950326
MSTRG.288.6	MSTRG.288	chr1:10037185-10045731	+	2	1407	0.000174	2.01835	0.000238	0.000226	0	0
MSTRG.298.1	MSTRG.298	chr1:10270577-10441960	+	46	10818	6.07035	5.02566	5.91081	2.20433	2.92139	2.71819
MSTRG.284.2	MSTRG.284	chr1:10459101-10468197	+	6	576	3.07811	2.44858	1.03033	1.04915	1.14002	0
MSTRG.285.1	MSTRG.285	chr1:10460498-10477066	-	7	735	0.538579	0.547481	0.340977	0.228943	1.5765	0.52731
MSTRG.303.5	MSTRG.303	chr1:10490569-10511716	+	7	960	4.21056	3.41015	2.78063	2.21622	2.06248	1.55302
MSTRG.304.1	MSTRG.304	chr1:10508933-10513231	-	1	4299	0.616867	0.467772	0.648899	0.833663	0.390132	1.7485
MSTRG.305.1	MSTRG.305	chr1:10513521-10532545	-	7	2314	0.357885	0.356025	0.650442	0.407879	0.463203	1.0377
MSTRG.305.4	MSTRG.305	chr1:10516592-10532536	-	8	4670	0	0	1.9703	0	0	1.11789
MSTRG.307.5	MSTRG.307	chr1:10535039-10580041	+	3	251	1.31882	1.22351	1.21438	2.75691	3.72269	3.09641
MSTRG.307.3	MSTRG.307	chr1:10535039-10641853	+	5	4238	5.1e-05	0.428317	2.07249	0	0.521305	0
MSTRG.307.4	MSTRG.307	chr1:10535039-10641864	+	5	4246	1.14662	0	0	0	0.195373	1.93584
MSTRG.308.1	MSTRG.308	chr1:10620367-10622985	-	1	2619	0.816432	1.1451	0.699532	0.053613	0.071965	0.36588
MSTRG.309.1	MSTRG.309	chr1:10623986-10624955	-	1	970	0.922222	1.098	0.918586	0.195672	0	0.297209
MSTRG.307.8	MSTRG.307	chr1:10630506-10641732	+	2	3959	0.004313	1.94762	0.009336	1.37004	0.34703	0
MSTRG.311.2	MSTRG.311	chr1:10696668-10754536	-	19	7817	1.56301	1.53706	1.5428	2.06331	2.52955	1.90144
MSTRG.317.14	MSTRG.317	chr1:11073785-11085260	+	7	2008	1.30267	1.93927	0.615918	0.614108	0.728385	0.670522
MSTRG.314.11	MSTRG.314	chr1:11143872-11159916	-	10	4430	5.18085	1.5639	5.53697	6.72731	5.477	7.49554
MSTRG.329.2	MSTRG.329	chr1:11708424-11714836	-	7	1453	0.791328	0.964403	2.45044	2.88608	2.44863	2.90865
MSTRG.330.1	MSTRG.330	chr1:11710582-11722346	+	6	2262	0.276039	0.260997	1.09487	2.91752	4.29583	4.87016
MSTRG.330.7	MSTRG.330	chr1:11714967-11723381	+	9	1754	1.31334	0.560163	1.15761	1.76369	1.63812	3.00291
MSTRG.333.1	MSTRG.333	chr1:11740410-11741259	+	3	335	1.21721	0.946967	0.586232	0.982406	2.47794	1.70633
MSTRG.339.4	MSTRG.339	chr1:11866317-11903183	+	24	4074	0	0	0	0.307889	0.504184	1.29899
MSTRG.339.6	MSTRG.339	chr1:11866320-11903183	+	22	5346	3.15235	3.33307	1.53273	2.592	2.26587	2.18011
MSTRG.335.3	MSTRG.335	chr1:11979689-11986480	-	4	2699	13.773	7.51124	2.05434	8.0214	21.4883	7.06524
MSTRG.341.9	MSTRG.341	chr1:12025509-12035593	+	6	1469	0.055066	0.01316	0.701047	1.20085	0.130739	0.452262
MSTRG.343.1	MSTRG.343	chr1:12040331-12041857	-	1	1527	1.15404	0.768041	0.989209	0.162758	0.05629	0.111903
MSTRG.342.2	MSTRG.342	chr1:12040356-12073563	+	21	4726	1.55378	1.3159	0.930526	0.628015	0.033494	0.069748
MSTRG.342.6	MSTRG.342	chr1:12040492-12073562	+	20	4545	30.6586	31.2558	32.121	26.3754	29.074	11.3507
MSTRG.342.7	MSTRG.342	chr1:12040492-12073565	+	20	4544	2.22995	2.25416	1.86481	0.77835	1.31442	12.447
MSTRG.351.7	MSTRG.351	chr1:12371583-12572099	+	42	9388	3.81478	1.22227	3.52156	0.345336	2.95649	1.03115
MSTRG.348.1	MSTRG.348	chr1:13348230-13348559	-	1	330	0	0	0	0.571722	0.276674	1.23041
MSTRG.361.1	MSTRG.361	chr1:15480248-15541407	-	2	220	0	0	0	0.39719	0.679518	1.4432
MSTRG.367.1	MSTRG.367	chr1:15643626-15649556	-	2	433	0.836296	1.33528	0.871029	0.089569	0.71031	0.518974
MSTRG.364.1	MSTRG.364	chr1:15736386-15736903	-	1	518	0.946369	0.918258	1.22547	0.798835	1.20444	1.09246
MSTRG.365.1	MSTRG.365	chr1:15736391-15756839	+	3	2284	8.97108	14.3636	12.7648	30.0845	33.3302	28.8984
MSTRG.371.1	MSTRG.371	chr1:15816230-15816505	-	1	276	1.37501	0.285948	1.39258	0.440488	0.432892	0.555474
MSTRG.376.1	MSTRG.376	chr1:15896287-15911605	-	8	4762	1.58114	1.20231	1.54267	1.51274	0.36062	0.317816
MSTRG.380.3	MSTRG.380	chr1:16010967-16061264	+	18	3943	12.5177	14.7912	15.9145	4.2652	12.2305	3.96879
MSTRG.380.6	MSTRG.380	chr1:16056340-16061264	+	8	1789	0	2.39392	3.42078	2.06155	7.40161	1.19684
MSTRG.385.1	MSTRG.385	chr1:16114938-16127037	-	4	2613	1.9957	2.53067	2.25292	0.474897	0.403273	0.530863
MSTRG.385.2	MSTRG.385	chr1:16115229-16126823	-	4	2004	0.849162	0.90607	1.3897	0.173557	0.239575	0.199288
MSTRG.385.6	MSTRG.385	chr1:16118177-16126772	-	4	962	1.67101	3.17223	3.32707	0.494887	0.572585	0.651226
MSTRG.385.5	MSTRG.385	chr1:16118177-16126823	-	4	1167	0.914727	1.62198	1.54993	0.271702	0.605948	0.453086
MSTRG.388.3	MSTRG.388	chr1:16133677-16134239	-	2	536	0.783144	1.69564	2.19097	1.06315	1.8885	1.60425
MSTRG.388.4	MSTRG.388	chr1:16154734-16174642	-	3	3084	1.57727	1.77675	1.56638	0.320136	0.479803	0.791409
MSTRG.390.1	MSTRG.390	chr1:16162522-16163021	+	1	500	0	0.087046	0.111269	0.193126	0.233109	1.17685
MSTRG.391.1	MSTRG.391	chr1:16174359-16266952	+	14	11752	3.63014	0	0	5.61406	0	9.275
MSTRG.391.4	MSTRG.391	chr1:16199997-16266952	+	14	12515	5.09026	7.7049	9.52805	1.80982	16.0327	11.0176
MSTRG.391.3	MSTRG.391	chr1:16199997-16266955	+	13	12359	0	0.502701	0	2.22244	0.458047	2.71122
MSTRG.391.5	MSTRG.391	chr1:16199997-16266955	+	13	12356	0	0	0.015411	2.58669	0.507444	3.0837
MSTRG.391.9	MSTRG.391	chr1:16244154-16266952	+	9	11619	2.18802	1.0759	0.117276	1.28076	0.128387	1.33558
MSTRG.394.1	MSTRG.394	chr1:16361066-16361554	-	1	489	0.801588	0.414956	1.0706	1.33077	2.10293	0.971206
MSTRG.401.1	MSTRG.401	chr1:16451623-16456061	+	2	326	0	0.391618	0.662174	0.537055	1.36555	0.923573
MSTRG.402.1	MSTRG.402	chr1:16458893-16459837	+	2	205	0	1.75035	0.508598	0	0.448763	0.632803
MSTRG.405.1	MSTRG.405	chr1:16488403-16492002	+	1	3600	1.32483	1.09033	1.02109	0.155838	0.224902	0.562638
MSTRG.399.1	MSTRG.399	chr1:16512963-16513688	+	1	726	0.765943	1.03334	1.12481	0	0.12967	0.051807
MSTRG.409.2	MSTRG.409	chr1:16524434-16533477	-	11	2003	0	0	7.27709	3.86369	3.20226	0
MSTRG.407.1	MSTRG.407	chr1:16557098-16557743	-	1	646	1.23366	0.717148	0.587908	1.24043	1.14561	0.865358
MSTRG.412.1	MSTRG.412	chr1:16693712-16721756	-	3	568	0.79699	2.28751	1.02614	1.51667	2.61478	1.29411
MSTRG.421.4	MSTRG.421	chr1:16767231-16785451	+	9	1017	0.843759	0	0	0.949744	1.2135	0
MSTRG.419.1	MSTRG.419	chr1:16791997-16792876	-	1	880	0.412726	1.28217	0.503773	0.393312	0.125361	0.572985
MSTRG.417.1	MSTRG.417	chr1:16885075-16885400	+	1	326	1.57237	1.61987	0.438757	0.27484	0.181754	0.839825
MSTRG.422.2	MSTRG.422	chr1:16888821-16939982	-	29	6115	1.09783	2.6887	1.94757	1.90769	3.11638	2.23959
MSTRG.422.3	MSTRG.422	chr1:16888851-16935145	-	19	4180	0.322355	0.463173	2.65571	0.274428	2.36294	0.322939
MSTRG.422.5	MSTRG.422	chr1:16888922-16935145	-	28	5549	0.139979	0.397677	5.31869	0.330637	0.009335	0.563248
MSTRG.422.6	MSTRG.422	chr1:16888924-16924344	-	23	7613	8.1136	8.63395	3.0637	8.58108	6.66358	7.93011
MSTRG.424.6	MSTRG.424	chr1:16944768-16969604	-	13	2678	3.47653	2.09264	1.97089	1.07204	2.36342	2.20751
MSTRG.424.5	MSTRG.424	chr1:16944768-16971181	-	11	2406	1.47791	1.98343	3.07858	4.48984	2.90008	2.79263
MSTRG.423.1	MSTRG.423	chr1:17011046-17012550	-	3	1349	47.6153	42.0047	41.728	44.9399	45.3706	44.6337
MSTRG.438.1	MSTRG.438	chr1:17221055-17222125	-	1	1071	3.54258	2.00511	3.41227	0.890989	0.979345	1.2574
MSTRG.442.1	MSTRG.442	chr1:17359587-17380532	+	3	272	0	0	0.192279	1.34613	1.14867	0
MSTRG.445.1	MSTRG.445	chr1:17749226-17766174	+	5	772	2.7106	1.8672	1.92894	1.03141	1.8034	1.17719
MSTRG.449.2	MSTRG.449	chr1:17866218-18024144	+	28	4266	0.52591	2.42517	3.64309	0.419956	1.03331	1.1213
MSTRG.449.6	MSTRG.449	chr1:17928666-18024355	+	22	3692	2.55158	0	0	1.43964	0	0.585695
MSTRG.464.4	MSTRG.464	chr1:19401008-19440566	-	30	5051	1.33512	1.99827	0.814932	0.587492	0.555438	0.828377
MSTRG.464.7	MSTRG.464	chr1:19401061-19426620	-	17	2531	0	0.006073	0	0.356148	1.92968	0.371455
MSTRG.464.15	MSTRG.464	chr1:19447694-19536770	-	67	10050	3.7511	0	7.18527	3.00333	4.62808	3.91147
MSTRG.466.1	MSTRG.466	chr1:19536995-19558116	+	2	1835	1.08397	1.24849	1.16785	0.182297	0.190022	0.204773
MSTRG.468.3	MSTRG.468	chr1:19578329-19591339	+	8	7121	4.00989	0.679462	4.48868	5.02709	5.68384	3.18332
MSTRG.453.1	MSTRG.453	chr1:19619267-19638597	-	7	7232	3.45758	3.07218	2.75986	1.83193	1.57231	2.28587
MSTRG.453.2	MSTRG.453	chr1:19625929-19637964	-	7	5963	2.3068	2.19787	2.60113	2.45806	1.63962	1.84491
MSTRG.459.1	MSTRG.459	chr1:19705136-19812016	+	4	311	0.430471	1.13573	0	0.319392	1.54735	0.243718
MSTRG.462.5	MSTRG.462	chr1:19923485-19935062	+	3	10371	3.68101	2.95535	3.59802	2.05565	1.21818	4.75207
MSTRG.463.1	MSTRG.463	chr1:19983984-19984497	-	1	514	0.241856	1.09664	0.277937	0.643672	1.09854	0.237353
MSTRG.470.4	MSTRG.470	chr1:20008737-20126438	-	15	2892	4.35795	3.15016	3.18873	1.96201	0.775284	1.54668
MSTRG.472.1	MSTRG.472	chr1:20204993-20205212	+	1	220	0	0	0	0.430289	1.05782	0.748069
MSTRG.474.3	MSTRG.474	chr1:20217936-20239435	+	7	6894	0.009464	0.007142	1.0274	0.012399	0.008425	3.61681
MSTRG.475.1	MSTRG.475	chr1:20808884-20813291	-	3	1695	0	0.021266	0	0.022637	0.019758	5.37264
MSTRG.471.2	MSTRG.471	chr1:20915579-20945396	+	5	941	0.106334	22.2762	26.0247	28.347	32.5092	25.4126
MSTRG.471.3	MSTRG.471	chr1:20915579-20945396	+	2	650	0	0	7.48014	0	0	0
MSTRG.477.6	MSTRG.477	chr1:20979127-20987862	-	9	1299	1.18784	1.03425	0.240675	0.157307	0.756198	0.348248
MSTRG.478.3	MSTRG.478	chr1:21046228-21058084	-	11	4057	2.42078	2.17426	1.66206	1.28223	0.04789	0.06742
MSTRG.478.4	MSTRG.478	chr1:21046231-21053687	-	7	3299	0	0.025109	0.183395	0.005598	1.44823	0.033114
MSTRG.479.2	MSTRG.479	chr1:21069175-21113765	-	13	3955	52.6007	52.5055	49.7905	10.8424	8.09827	17.0759
MSTRG.479.3	MSTRG.479	chr1:21069175-21113765	-	14	3642	0	0	3.54865	0	0	0
MSTRG.479.4	MSTRG.479	chr1:21069175-21113765	-	14	2479	2.93773	2.01422	1.31043	0.670777	0.964216	3.14112
MSTRG.479.7	MSTRG.479	chr1:21072085-21113765	-	12	3891	2.27801	2.5084	1.27909	0.671508	0.311499	0.375655
MSTRG.479.11	MSTRG.479	chr1:21083692-21113816	-	9	3567	5.69492	3.69653	3.44312	2.09709	1.49442	3.70256
MSTRG.479.15	MSTRG.479	chr1:21101943-21113765	-	4	888	0.162873	0.671696	6.17921	0.198652	2.93902	10.4236
MSTRG.481.3	MSTRG.481	chr1:21132963-21144038	-	3	1267	0.631023	0.714378	0.505393	2.00426	1.41893	1.70807
MSTRG.481.2	MSTRG.481	chr1:21132963-21503312	-	34	6160	2.80979	2.38618	0.245901	4.53459	3.2631	4.78602
MSTRG.481.8	MSTRG.481	chr1:21151597-21503312	-	31	4860	17.7854	18.0724	16.8519	11.4292	8.97901	11.9471
MSTRG.483.1	MSTRG.483	chr1:21181511-21188756	+	4	318	0.139008	1.45776	0.717465	0.276776	0.691983	0.749281
MSTRG.488.1	MSTRG.488	chr1:21502679-21503339	+	2	298	0.179216	0.260943	0.341583	0.426561	1.00005	1.74521
MSTRG.491.1	MSTRG.491	chr1:21546299-21546544	+	1	246	0.164291	0.635349	0.489411	1.50128	0.49123	0.785391
MSTRG.492.1	MSTRG.492	chr1:21548251-21551864	+	2	207	1.16798	0.256045	0.370506	0.319659	0.740084	0.230583
MSTRG.489.1	MSTRG.489	chr1:21749530-21752877	-	3	2030	1.22733	1.19969	1.35004	1.96541	2.0886	2.1758
MSTRG.497.1	MSTRG.497	chr1:21922708-21953666	-	24	3323	0.181987	0.204715	0.232544	0.608846	4.58004	0.312223
MSTRG.497.3	MSTRG.497	chr1:21922711-21954099	-	24	3777	0.012065	0.199114	1.62901	0.015362	0.330856	0.738191
MSTRG.497.12	MSTRG.497	chr1:21922721-21953738	-	23	3323	5.85087	5.20945	3.31614	3.81858	0.654704	3.31225
MSTRG.498.1	MSTRG.498	chr1:21926071-21932630	+	4	336	0	1.19573	0.299295	0	0	0.27354
MSTRG.499.3	MSTRG.499	chr1:22005396-22110099	-	28	4165	16.1468	0	0	0	0	0
MSTRG.499.13	MSTRG.499	chr1:22055105-22109436	-	12	1526	0	0.104569	3.66032	0.037877	5.36023	0.109175
MSTRG.499.14	MSTRG.499	chr1:22055105-22109719	-	12	1607	1.89026	0	0	0.96384	0.144248	0.191342
MSTRG.506.1	MSTRG.506	chr1:22243254-22246385	-	1	3132	0.932838	0.957666	0.737538	0.717371	0.485277	1.62577
MSTRG.507.1	MSTRG.507	chr1:22246887-22249661	-	1	2775	0.731459	0.789138	0.608853	0.372505	0.485127	1.27798
MSTRG.508.1	MSTRG.508	chr1:22250855-22252486	-	1	1632	0.368039	0.518909	0.491666	0.387118	0.311948	1.33225
MSTRG.509.3	MSTRG.509	chr1:22379182-22419416	+	6	2086	80.1143	47.979	101.189	147.516	90.4481	150.739
MSTRG.512.1	MSTRG.512	chr1:22755380-22857642	+	17	9284	0	0.461398	0.652634	0	0.782836	1.85528
MSTRG.513.1	MSTRG.513	chr1:22769226-22774928	+	1	5703	0.520399	0.260695	0.347405	0.470321	0.315208	1.57334
MSTRG.512.4	MSTRG.512	chr1:22778360-22857641	+	17	9293	3.77683	6.49405	3.8713	0.007358	1.23042	4.12959
MSTRG.523.2	MSTRG.523	chr1:23345941-23410175	+	20	3104	0.717865	0.024058	5.76151	7.17105	12.644	0.885852
MSTRG.523.1	MSTRG.523	chr1:23345941-23410181	+	19	3761	14.7445	10.2715	17.0225	62.5919	65.2748	17.6151
MSTRG.523.4	MSTRG.523	chr1:23345948-23410175	+	20	3079	29.7534	31.5142	9.11059	2.60779	2.70644	20.03
MSTRG.524.1	MSTRG.524	chr1:23345974-23376954	-	3	708	0.311414	0.798604	0.396915	0.992283	1.45024	0.748859
MSTRG.523.6	MSTRG.523	chr1:23376918-23410175	+	15	2019	5.86717	4.80206	0	31.4554	21.6567	82.1512
MSTRG.523.9	MSTRG.523	chr1:23403727-23410175	+	2	1181	0	0	0	0	0	1.02559
MSTRG.525.4	MSTRG.525	chr1:23410516-23460172	-	5	8609	3.38623	1.63183	0.000367	0	0	0
MSTRG.525.3	MSTRG.525	chr1:23410516-23495338	-	5	8474	4.59854	6.67973	8.32581	12.3907	12.68	13.39
MSTRG.520.1	MSTRG.520	chr1:23518388-23544033	-	2	3357	4.4055	3.88404	2.5728	3.0952	0.341776	0.458275
MSTRG.522.1	MSTRG.522	chr1:23607802-23619998	-	3	6906	2.89701	2.72929	2.98075	0.299004	0.054696	0.495845
MSTRG.521.1	MSTRG.521	chr1:23620835-23621433	-	1	599	0.643692	1.42283	1.31759	0.128173	0.096966	0.306305
MSTRG.532.2	MSTRG.532	chr1:23630456-23670755	-	12	1659	2.57913	2.18502	3.03424	1.56576	0.703589	0
MSTRG.533.1	MSTRG.533	chr1:23636663-23650079	+	6	1542	0.599901	0.741813	1.17708	1.03039	1.24781	0.940746
MSTRG.531.1	MSTRG.531	chr1:23682803-23684466	-	1	1664	1.21473	0.823146	1.15933	0.836594	0.89278	1.95501
MSTRG.534.1	MSTRG.534	chr1:23685941-23751200	-	14	9928	2.93992	2.61577	2.83468	1.50949	1.44467	2.24457
MSTRG.534.3	MSTRG.534	chr1:23686468-23696284	-	4	4636	2.56782	0.616082	1.086	3.79369	0.663192	1.13942
MSTRG.534.4	MSTRG.534	chr1:23686468-23751233	-	15	6903	2.64591	2.31651	1.64845	0.976314	0.126272	1.37506
MSTRG.534.7	MSTRG.534	chr1:23704876-23751200	-	10	4141	12.5632	4.1764	4.64737	1.78434	1.23069	1.22844
MSTRG.534.8	MSTRG.534	chr1:23707554-23751200	-	12	1905	0	20.2942	19.0683	12.7865	14.9307	10.2964
MSTRG.536.1	MSTRG.536	chr1:23713804-23724087	+	3	314	0.526976	0.616036	1.73379	0.948793	0.991918	0.180586
MSTRG.537.1	MSTRG.537	chr1:23724389-23744487	+	4	356	1.59039	1.18235	0.834378	0.591847	0.950448	0.328752
MSTRG.539.2	MSTRG.539	chr1:23842851-23857712	-	6	1892	0.468999	0.317714	0.441378	0.538517	0.337075	1.89667
MSTRG.542.1	MSTRG.542	chr1:24018269-24022908	+	6	624	35.9582	46.2338	37.3839	17.7549	32.9198	286.963
MSTRG.543.1	MSTRG.543	chr1:24018307-24022913	-	6	594	5.14145	8.57444	8.40021	9.10768	11.9084	4.59886
MSTRG.542.4	MSTRG.542	chr1:24018371-24022908	+	6	753	0	0	0	100.137	0	122.193
MSTRG.545.2	MSTRG.545	chr1:24087024-24098887	-	3	800	1.63325	1.6826	0.829376	0.380952	0.409242	0.540165
MSTRG.547.1	MSTRG.547	chr1:24104917-24106425	-	2	359	0	1.45858	0	0	1.30843	1.989
MSTRG.553.12	MSTRG.553	chr1:24124186-24125926	-	3	363	2.58368	0.87684	2.86891	2.21429	5.5244	2.06319
MSTRG.553.14	MSTRG.553	chr1:24124186-24127251	-	5	539	1.44277	2.38605	0.954414	2.09473	3.90796	1.50518
MSTRG.549.1	MSTRG.549	chr1:24171567-24194784	-	8	2221	1.17745	2.18892	3.26817	2.26178	3.87367	0
MSTRG.549.2	MSTRG.549	chr1:24171567-24194784	-	8	3288	1.15676	1.08868	0.250601	2.30369	0.128634	2.62011
MSTRG.556.7	MSTRG.556	chr1:24293797-24306809	-	7	1074	1.63048	0	1.6846	1.71879	1.45111	1.15797
MSTRG.556.13	MSTRG.556	chr1:24296869-24305436	-	6	2651	2.82172	1.24039	0.96445	1.69535	1.04628	4.16269
MSTRG.556.12	MSTRG.556	chr1:24296869-24306761	-	7	1994	2.81604	2.13987	6.89137	3.43471	7.07018	6.27714
MSTRG.554.1	MSTRG.554	chr1:24442113-24443684	-	1	1572	0.396089	0.280063	0.541469	1.04637	1.37712	0.942346
MSTRG.557.1	MSTRG.557	chr1:24562862-24566596	+	2	1044	0.336312	0.160752	0.393873	1.72765	0.951575	1.56871
MSTRG.566.2	MSTRG.566	chr1:24683490-24741765	-	10	4114	0	0	0	0	1.63056	0.00287
MSTRG.559.1	MSTRG.559	chr1:24801523-24802569	+	1	1047	1.14735	1.37123	1.94746	0.567734	0.835664	1.64099
MSTRG.560.1	MSTRG.560	chr1:24802836-24803225	+	1	390	1.368	0.617505	1.04717	0.317412	0.14693	0.440591
MSTRG.574.10	MSTRG.574	chr1:24969796-24995999	+	15	2271	3.92789	4.13517	4.6165	2.3045	3.02632	3.55516
MSTRG.574.12	MSTRG.574	chr1:24969799-24981620	+	11	2337	6.65069	9.19813	8.06943	6.91701	3.38337	9.59823
MSTRG.576.1	MSTRG.576	chr1:24995645-24998756	-	4	924	0.909162	0.545764	0.76773	0.696589	1.16755	1.47862
MSTRG.569.1	MSTRG.569	chr1:25071870-25140620	-	3	393	0.59729	0.937645	0.938695	0.026182	1.32517	0.693248
MSTRG.571.3	MSTRG.571	chr1:25226009-25258397	-	6	3947	0	14.9799	0	0	0.002123	0
MSTRG.571.2	MSTRG.571	chr1:25226009-25291612	-	6	3845	0.023246	1.76519	0.446565	5.97778	3.6634	4.43653
MSTRG.572.1	MSTRG.572	chr1:25256529-25256756	+	1	228	0.223159	0.220584	0.42952	1.25043	0.36246	0.942052
MSTRG.578.1	MSTRG.578	chr1:25553939-25558981	+	5	484	0.826458	1.25134	0.413722	0.352578	1.61242	0.891498
MSTRG.582.2	MSTRG.582	chr1:25568740-25573026	-	5	1538	1.96949	0.798185	2.07593	0.397051	0.691383	1.09065
MSTRG.582.12	MSTRG.582	chr1:25568854-25573937	-	6	1178	6.2289	5.26669	4.17472	3.33206	7.46539	3.93969
MSTRG.584.1	MSTRG.584	chr1:25577490-25577973	-	1	484	1.1601	0.179847	0.261804	0.51284	0.009262	0.701364
MSTRG.582.21	MSTRG.582	chr1:25588069-25663892	-	3	4079	1.9983	1.33247	1.37354	0.951506	1.15133	1.75372
MSTRG.582.23	MSTRG.582	chr1:25628800-25664681	-	3	4052	1.86695	0.580274	1.52848	2.34531	2.58	2.16479
MSTRG.582.24	MSTRG.582	chr1:25629046-25664728	-	3	2732	0.678716	1.38726	0.429955	0.095536	0.007605	0.834669
MSTRG.582.28	MSTRG.582	chr1:25658063-25664681	-	3	4439	2.5204	1.55218	2.13619	0.637822	0.701477	2.26329
MSTRG.592.1	MSTRG.592	chr1:25714502-25715316	+	1	815	1.01769	0.679397	0.837138	0.732357	1.00945	1.21921
MSTRG.597.20	MSTRG.597	chr1:26146494-26159425	+	6	2103	0	0	0.870565	1.67228	0.017924	1.7665
MSTRG.599.1	MSTRG.599	chr1:26151730-26157899	-	1	6170	1.09632	1.21435	1.35203	1.09178	0.669929	1.89196
MSTRG.596.1	MSTRG.596	chr1:26187701-26202523	-	3	3283	1.89625	4.45369	4.04071	3.49864	4.69869	2.52578
MSTRG.604.1	MSTRG.604	chr1:26227056-26232900	+	5	984	1.71974	1.62808	1.485	1.71339	2.35335	1.66999
MSTRG.601.6	MSTRG.601	chr1:26227086-26232908	-	6	876	0	16.4317	0	0	0	0
MSTRG.614.1	MSTRG.614	chr1:26606577-26607444	-	2	307	0.321477	0.209818	0.266398	1.51494	0.812644	0.781104
MSTRG.615.8	MSTRG.615	chr1:26608775-26629631	-	16	1687	1.03187	0.934286	2.23151	1.22424	0.490635	1.8401
MSTRG.615.6	MSTRG.615	chr1:26608775-26629658	-	15	1615	1.13647	0.821081	0.643654	1.98002	0.372014	1.15119
MSTRG.615.10	MSTRG.615	chr1:26608775-26633100	-	14	2435	1.2289	1.69017	2.19551	1.45845	1.00739	1.64294
MSTRG.615.5	MSTRG.615	chr1:26608775-26633100	-	14	2489	0	5.15401	0	0	0.388572	0
MSTRG.615.9	MSTRG.615	chr1:26608775-26633100	-	14	2489	1.71283	1.51779	3.54218	1.17692	0.295865	1.61805
MSTRG.615.7	MSTRG.615	chr1:26608775-26633127	-	16	2769	2.14608	0.305613	0.522565	0	0.333639	0.156912
MSTRG.621.1	MSTRG.621	chr1:26798946-26802284	-	6	1076	5.41703	5.16704	4.96159	3.06828	4.24195	2.9125
MSTRG.627.1	MSTRG.627	chr1:27022866-27023207	-	1	342	1.14428	0.403839	0.689696	0.174963	0.582443	0.389103
MSTRG.628.1	MSTRG.628	chr1:27049366-27049571	+	1	206	0	0	1.25067	0	0	0
MSTRG.624.2	MSTRG.624	chr1:27114424-27124884	+	4	2145	0.263043	2.40625	0.006641	0.499326	1.01443	2.2255
MSTRG.632.3	MSTRG.632	chr1:27153240-27182182	+	8	3468	0	2.39037	0	0	0	0
MSTRG.632.2	MSTRG.632	chr1:27153240-27182183	+	7	3594	2.77269	0.551042	9.62536	10.8359	12.999	12.0126
MSTRG.631.1	MSTRG.631	chr1:27189652-27190548	-	1	897	0.973137	1.17355	0.679316	0.830855	1.07862	0.969299
MSTRG.635.2	MSTRG.635	chr1:27202625-27216788	-	4	9087	1.71636	2.8348	3.20472	2.59022	1.46725	4.09206
MSTRG.640.1	MSTRG.640	chr1:27248234-27272642	-	9	1072	2.27603	2.86899	1.61374	2.04158	2.59143	1.56113
MSTRG.633.1	MSTRG.633	chr1:27320198-27327389	+	4	1503	0	0	0	0	2.22794	0
MSTRG.641.1	MSTRG.641	chr1:27425306-27481972	-	13	4095	0	2.3879	1.85922	0.777688	2.43302	0.005828
MSTRG.642.4	MSTRG.642	chr1:27614200-27634735	+	11	3511	2.87048	2.53086	5.2421	1.02693	2.36976	2.48583
MSTRG.644.7	MSTRG.644	chr1:27648772-27656211	+	2	4485	2.18067	1.87063	2.46921	3.56557	3.51767	5.1486
MSTRG.647.1	MSTRG.647	chr1:27721727-27724044	-	1	2318	0.568834	0.773408	0.876152	0.702244	0.610621	1.60802
MSTRG.648.1	MSTRG.648	chr1:27725146-27725349	-	1	204	0.1592	0.887527	1.74299	0.544739	1.10448	0.591486
MSTRG.653.2	MSTRG.653	chr1:27860814-27930438	-	8	6395	2.31176	1.58257	0	1.53741	1.91641	3.26112
MSTRG.653.3	MSTRG.653	chr1:27860814-27930694	-	8	6756	0.449188	0.529295	1.04437	1.43888	1.41517	1.24448
MSTRG.653.5	MSTRG.653	chr1:27860814-27930694	-	9	6524	0	0	0	1.61959	0	0
MSTRG.653.4	MSTRG.653	chr1:27860814-27930733	-	9	6571	0	0	1.16832	1.63421	2.88021	2.35007
MSTRG.666.2	MSTRG.666	chr1:28157325-28178187	+	8	1183	23.6745	7.84671	3.45755	1.93895	2.15586	7.36666
MSTRG.665.1	MSTRG.665	chr1:28187938-28188254	+	1	317	0	0	0.055917	0.256676	0.060255	1.15517
MSTRG.669.2	MSTRG.669	chr1:28218037-28241244	-	8	1665	1.19196	1.74155	3.45324	21.5546	14.298	6.52431
MSTRG.677.1	MSTRG.677	chr1:28525967-28559515	-	10	1463	0.980207	1.26138	1.45644	0.711526	0.869439	1.49722
MSTRG.677.3	MSTRG.677	chr1:28526789-28559515	-	10	1664	37.9276	32.3106	28.7749	37.1319	45.0472	31.4182
MSTRG.679.1	MSTRG.679	chr1:28527643-28537130	+	6	623	1.1957	1.02679	0.426926	1.06236	0.89476	1.15136
MSTRG.680.1	MSTRG.680	chr1:28561973-28564611	+	4	786	65.9667	62.0744	59.4244	31.9445	50.7268	56.7718
MSTRG.681.1	MSTRG.681	chr1:28562639-28564603	-	3	491	0.785646	1.29811	0.703799	0.5929	1.36713	0.427729
MSTRG.682.1	MSTRG.682	chr1:28566020-28573600	-	2	1635	1.19622	1.63752	1.87306	1.61882	0.959994	2.3913
MSTRG.683.1	MSTRG.683	chr1:28586038-28609002	+	9	3302	0	0	2.5793	0	0	0
MSTRG.684.1	MSTRG.684	chr1:28672571-28672836	-	1	266	0.101744	0.526493	0.816154	1.0962	0.285767	0.83403
MSTRG.686.8	MSTRG.686	chr1:28764682-28826876	+	14	5646	0	5.1738	0	5.44534	7.02649	2.30947
MSTRG.690.5	MSTRG.690	chr1:28832555-28837404	+	4	395	1.99392	5.42579	3.46452	0	0	0.25828
MSTRG.690.7	MSTRG.690	chr1:28832568-28837404	+	4	1228	0	0.330631	2.61382	0	0.412688	1.04828
MSTRG.690.8	MSTRG.690	chr1:28832568-28862538	+	11	1875	0.680865	1.50678	1.91242	0	0.071017	0
MSTRG.690.13	MSTRG.690	chr1:28844648-28865868	+	11	2516	0.055966	0	0	2.47608	0.271161	0
MSTRG.693.1	MSTRG.693	chr1:28844772-28858803	-	4	440	0.433844	0.419403	0	0.355456	1.18982	0.691227
MSTRG.699.1	MSTRG.699	chr1:28866776-28923123	+	2	4070	4.07234	4.22679	4.3187	1.7589	2.10189	2.31182
MSTRG.700.1	MSTRG.700	chr1:28870972-28873054	+	2	1604	0	0	0	1.40604	0	0
MSTRG.701.3	MSTRG.701	chr1:28879609-28904276	+	11	1207	0	1.80179	0.954176	1.05686	1.00147	1.50127
MSTRG.702.11	MSTRG.702	chr1:28905058-28908330	-	6	924	7.23241	5.81946	9.05617	4.81806	4.19609	4.39073
MSTRG.702.10	MSTRG.702	chr1:28905058-28908369	-	5	1058	1.04744	1.66118	1.82613	0.883394	0.642028	0.452242
MSTRG.706.3	MSTRG.706	chr1:29213633-29446550	+	19	5802	5.47596	6.04639	5.3734	5.71296	6.69636	6.36367
MSTRG.706.4	MSTRG.706	chr1:29213633-29446550	+	18	5739	4.01195	3.42565	3.66524	3.72315	3.88871	3.69687
MSTRG.706.5	MSTRG.706	chr1:29213633-29446550	+	17	5610	0.594694	1.03899	0.553901	0.982653	1.01667	1.39833
MSTRG.706.11	MSTRG.706	chr1:29241091-29446550	+	19	5919	2.90449	3.05698	2.53255	3.10393	2.29998	2.55272
MSTRG.706.12	MSTRG.706	chr1:29241091-29446550	+	18	5856	3.01006	2.63479	2.70834	3.06635	2.77068	2.70712
MSTRG.711.2	MSTRG.711	chr1:29474365-29508394	-	9	2667	12.9417	13.0364	13.6901	30.0168	33.3866	27.9495
MSTRG.712.1	MSTRG.712	chr1:29474825-29481360	+	3	1157	5.99805	4.34469	4.04322	3.90483	3.57145	2.1204
MSTRG.712.2	MSTRG.712	chr1:29475195-29481309	+	2	646	0	3.32613	0.61648	0	0.981285	2.64049
MSTRG.715.1	MSTRG.715	chr1:29523692-29531722	+	1	8031	1.44263	1.6308	1.47111	1.17963	0.983372	1.10954
MSTRG.716.1	MSTRG.716	chr1:29543948-29546679	+	1	2732	0.943409	0.879149	1.10903	0.277257	0.220591	0.605194
MSTRG.718.5	MSTRG.718	chr1:29579128-29630552	+	16	2853	2.85065	2.93153	4.86268	0.016535	2.33496	1.63998
MSTRG.720.1	MSTRG.720	chr1:29614695-29615343	-	1	649	0.923261	1.08699	0.871836	0.135128	0	0.366548
MSTRG.723.2	MSTRG.723	chr1:31342315-31360579	-	5	5061	0	0	2.49221	0	0	0.005907
MSTRG.734.6	MSTRG.734	chr1:31769842-31849873	+	9	1322	0	0.008487	1.19492	1.1531	1.05363	2.29682
MSTRG.734.10	MSTRG.734	chr1:31769855-31837783	+	9	1342	0	1.03984	0	1.44562	2.26154	0
MSTRG.734.11	MSTRG.734	chr1:31769855-31837783	+	9	1345	1.90132	1.02917	1.21055	1.07493	2.12461	1.4083
MSTRG.734.12	MSTRG.734	chr1:31769855-31837783	+	9	1316	1.95573	0.588431	3.59182	0.729077	1.33169	0
MSTRG.734.9	MSTRG.734	chr1:31769855-31837783	+	9	1395	6.74195	0	0	0	0	0
MSTRG.736.1	MSTRG.736	chr1:31832215-31849204	-	6	2049	2.96839	3.96625	3.57031	2.46066	1.34481	1.6497
MSTRG.730.5	MSTRG.730	chr1:31886041-31907525	+	12	2660	1.75368	0.16151	0.207545	0.459543	0.411828	0.792281
MSTRG.737.15	MSTRG.737	chr1:32042169-32053283	+	13	2125	0	9.18729	0	0	0	0
MSTRG.739.1	MSTRG.739	chr1:32044802-32049131	-	3	230	0.626786	1.16229	0.254861	0.403321	0.844034	0
MSTRG.740.1	MSTRG.740	chr1:32051422-32052906	-	3	569	0.553012	0.934201	0.679187	1.0775	0.785796	0.853951
MSTRG.744.3	MSTRG.744	chr1:32118189-32132282	-	20	2133	1.35514	1.21201	2.157	0.617561	0.773747	2.30876
MSTRG.744.5	MSTRG.744	chr1:32119205-32136038	-	22	2039	8.58994	5.44327	5.46557	3.81138	4.29552	1.64294
MSTRG.745.10	MSTRG.745	chr1:32193012-32222402	-	27	4317	1.84675	0	0.642521	1.92186	0	1.9933
MSTRG.745.11	MSTRG.745	chr1:32193012-32222402	-	27	4559	0.057896	0	0	2.24297	0.630234	2.33501
MSTRG.748.3	MSTRG.748	chr1:32256029-32264317	-	8	1908	2.05658	0.011973	0.005293	1.93741	0.026182	0.005224
MSTRG.748.5	MSTRG.748	chr1:32256078-32279730	-	12	4626	0.364435	0.86309	1.11393	0.924376	0.928889	1.74454
MSTRG.751.1	MSTRG.751	chr1:32369225-32403386	-	9	3708	4e-05	0.00952	0.00183	1.63292	0.091165	0.029382
MSTRG.751.2	MSTRG.751	chr1:32372022-32403959	-	7	3518	32.1696	28.9134	41.7963	19.1709	25.2822	17.5182
MSTRG.751.4	MSTRG.751	chr1:32372022-32403959	-	6	3900	30.3656	50.7681	14.3895	29.5611	22.3312	29.0626
MSTRG.753.1	MSTRG.753	chr1:32385143-32403954	+	2	484	3.24656	3.44307	3.63153	4.85042	8.10115	5.27799
MSTRG.756.1	MSTRG.756	chr1:32479610-32479894	-	1	285	0.640673	1.27939	0.325142	0.233284	1.11884	0.501088
MSTRG.758.9	MSTRG.758	chr1:32539047-32557610	+	4	1109	0.579614	0.396851	0.627641	0.35102	0.904177	1.17884
MSTRG.765.1	MSTRG.765	chr1:32573639-32697205	+	15	6706	1.66865	2.86079	0.091677	2.94027	3.34309	0.119445
MSTRG.765.4	MSTRG.765	chr1:32608524-32642163	+	17	6309	1.6367	0.036881	0.054085	0.313797	0.182356	0.58763
MSTRG.765.6	MSTRG.765	chr1:32622463-32642169	+	15	5987	3e-06	0	4.21941	0	0	1e-06
MSTRG.767.1	MSTRG.767	chr1:32645352-32647172	-	3	557	1.13892	0.825139	1.04136	0.8966	1.41019	0.888801
MSTRG.769.1	MSTRG.769	chr1:32666101-32667815	-	2	512	0.604358	0.375537	0.332838	0.985357	1.27642	0.698434
MSTRG.768.3	MSTRG.768	chr1:32666234-32670988	+	5	648	0.544048	0	2.1785	1.13427	1.31891	4.44467
MSTRG.773.9	MSTRG.773	chr1:32681801-32686797	-	4	805	1.09492	0	1.60438	0.483233	0.47117	0.318498
MSTRG.775.1	MSTRG.775	chr1:32705992-32714457	+	1	8466	1.84356	1.75189	1.85651	2.36585	1.20019	3.22393
MSTRG.762.1	MSTRG.762	chr1:32796453-32798770	-	6	652	0.783669	1.56217	0.838753	1.53918	1.63668	1.75491
MSTRG.764.1	MSTRG.764	chr1:32800219-32801821	+	2	754	0.658054	1.22475	1.10423	0.891646	1.4251	1.2729
MSTRG.779.3	MSTRG.779	chr1:32826872-32860026	-	11	8253	0.380161	0.308422	0.228744	0.761962	1.15919	0.288628
MSTRG.779.2	MSTRG.779	chr1:32826872-32860049	-	13	6403	3.70057	2.94365	3.02667	1.32979	0	2.11986
MSTRG.777.1	MSTRG.777	chr1:32901602-32901830	+	1	229	1.15294	1.75364	2.32835	2.79063	1.89351	5.51236
MSTRG.782.1	MSTRG.782	chr1:32930658-33071542	+	11	7816	0	0.000769	1.41675	0.0002	0	0.000105
MSTRG.782.4	MSTRG.782	chr1:33004759-33071540	+	6	7085	0.346051	0.891348	1.25335	0.706569	0.029761	0.507684
MSTRG.782.6	MSTRG.782	chr1:33005030-33071540	+	6	6954	0.234763	0	0	1.04837	1.56468	0.685033
MSTRG.782.7	MSTRG.782	chr1:33005030-33071541	+	7	6174	3.00626	1e-06	0	0.365373	0.000203	0.658808
MSTRG.783.3	MSTRG.783	chr1:33086435-33116126	-	7	1566	9.11528	8.01478	7.99029	3.06382	10.2965	10.8571
MSTRG.783.12	MSTRG.783	chr1:33087459-33116136	-	6	499	3.22143	1.32193	1.48061	3.07626	1.87399	1.91456
MSTRG.786.1	MSTRG.786	chr1:33116814-33123075	-	3	306	0	0.684609	0.996237	1.56438	0	0.439871
MSTRG.781.1	MSTRG.781	chr1:33207606-33233558	-	2	356	1.17328	1.06389	0.245014	0.739031	0.589103	0.231681
MSTRG.791.1	MSTRG.791	chr1:33265480-33292061	+	4	724	1.85056	0.238521	0.490481	0.319468	0.18913	0.784229
MSTRG.791.10	MSTRG.791	chr1:33283257-33324475	+	7	4213	3.94067	0.43564	0.433317	3.04171	2.93293	0.378531
MSTRG.792.1	MSTRG.792	chr1:33398925-33430843	-	10	3746	3.25934	0	0	1.71223	0	1.46031
MSTRG.792.2	MSTRG.792	chr1:33398925-33430843	-	10	3793	1.96198	0.306997	0.267513	1.61313	1.08941	1.0957
MSTRG.792.4	MSTRG.792	chr1:33402055-33431384	-	11	3294	2.40602	0.399583	0	5.5042	4.87571	9.23167
MSTRG.792.6	MSTRG.792	chr1:33402269-33430286	-	9	2387	1.47993	1.70713	8.6836	1.16408	1.2638	1.007
MSTRG.792.7	MSTRG.792	chr1:33402269-33430484	-	10	2427	0	23.8989	0	0	0	0
MSTRG.800.5	MSTRG.800	chr1:33473585-33502441	-	9	1623	0	0	0	0	33.1708	0
MSTRG.801.1	MSTRG.801	chr1:33475665-33480184	+	3	1028	0.436499	0.673072	0.644307	0.486142	1.1465	0.330957
MSTRG.800.8	MSTRG.800	chr1:33476120-33502503	-	8	1201	2.26025	2.63403	3.13101	2.28065	2.81055	4.9533
MSTRG.802.1	MSTRG.802	chr1:33516058-33516461	+	1	404	0.017417	0.401235	0.211125	0.598719	0.586652	1.25376
MSTRG.793.1	MSTRG.793	chr1:33721247-33721684	+	1	438	0	0.130282	0.120208	0.630309	0.371125	1.31379
MSTRG.797.1	MSTRG.797	chr1:33726093-33726420	+	1	328	0.826222	0.350307	0.100593	1.08011	0.670292	1.11876
MSTRG.811.1	MSTRG.811	chr1:33830821-33831482	+	1	662	0.462786	0.685205	1.18822	0.35773	0.348302	0.364253
MSTRG.805.1	MSTRG.805	chr1:33964323-33967311	+	1	2989	1.13622	1.01876	1.01156	1.08204	0.952302	1.35454
MSTRG.813.1	MSTRG.813	chr1:35220648-35224113	+	2	1352	0.73323	0.394779	0	0.634456	1.20139	1.65245
MSTRG.819.1	MSTRG.819	chr1:35315632-35317127	-	1	1496	1.41019	1.06415	1.45236	0.738593	0.466648	1.12665
MSTRG.821.6	MSTRG.821	chr1:35452581-35497327	-	16	4272	1.61212	2.62257	3.27358	1.35873	3.03298	1.82517
MSTRG.822.6	MSTRG.822	chr1:35544992-35580237	+	11	3054	5.47997	0	5.045	4.26709	4.29655	5.20697
MSTRG.823.1	MSTRG.823	chr1:35548490-35584287	+	2	538	0	0.711137	0	0	0.812436	1.67785
MSTRG.824.1	MSTRG.824	chr1:35574683-35582462	+	2	342	0.903696	1.05208	0.9432	1.27243	1.08601	2.11299
MSTRG.823.2	MSTRG.823	chr1:35575557-35583624	+	2	494	0	2.06319	0	0	0.012502	1.80593
MSTRG.823.3	MSTRG.823	chr1:35578009-35584386	+	2	1234	0.881579	0.00015	0.753923	1.33264	0.521386	0.005617
MSTRG.825.1	MSTRG.825	chr1:35621192-35656175	-	10	897	25.7301	0	0	0	0	0
MSTRG.825.3	MSTRG.825	chr1:35641979-35653643	-	7	3926	7.9403	7.25243	8.71678	3.1486	2.73504	8.05006
MSTRG.825.2	MSTRG.825	chr1:35641979-35658749	-	13	2336	0.024423	0	0.041121	0	0	73.5181
MSTRG.826.1	MSTRG.826	chr1:35649777-35658738	+	10	2492	0.781344	1.16433	1.19186	1.66723	2.17191	1.67681
MSTRG.827.1	MSTRG.827	chr1:35734289-35887545	+	31	7335	14.0378	2.72788	9.06422	2.87452	1.58528	3.21328
MSTRG.827.2	MSTRG.827	chr1:35734289-35887545	+	27	6518	1.37689	3.84967	0.012828	4.72426	0.01305	4.25162
MSTRG.835.1	MSTRG.835	chr1:35990302-35997505	-	1	7204	1.69619	1.40029	1.48008	1.10601	0.533371	2.22365
MSTRG.836.1	MSTRG.836	chr1:36000965-36001651	-	1	687	0.417056	0.08447	0.206414	0.372823	0	1.15915
MSTRG.832.2	MSTRG.832	chr1:36067185-36108226	-	7	2649	0	0	0	69.5655	0	0
MSTRG.838.1	MSTRG.838	chr1:36109374-36235529	-	26	5902	4.21637	5.27817	6.02489	5.56581	8.13289	5.14187
MSTRG.842.1	MSTRG.842	chr1:36215319-36216986	+	2	230	1.06922	0.613947	1.10948	0.559557	0	0
MSTRG.843.1	MSTRG.843	chr1:36273235-36323472	+	18	6923	1.45787	1.82836	1.35877	1.02764	1.28232	0.559651
MSTRG.843.3	MSTRG.843	chr1:36307274-36323491	+	6	2921	4.92141	3.94252	6.282	1.80647	0	1.95855
MSTRG.848.2	MSTRG.848	chr1:36396333-36538101	+	20	19603	0	0	1.00363	0.139775	0.495078	1.27409
MSTRG.848.7	MSTRG.848	chr1:36432556-36537971	+	18	18618	0	0	1.42709	1.37455	0	0
MSTRG.848.10	MSTRG.848	chr1:36498815-36537973	+	2	2439	0	2.65604	0	0	0	0.555015
MSTRG.848.12	MSTRG.848	chr1:36510093-36538006	+	2	6917	1.14563	0.000755	0	0	0	0
MSTRG.844.1	MSTRG.844	chr1:36554476-36559533	+	5	3796	2.23533	2.37286	3.26094	2.31705	1.22734	2.98295
MSTRG.844.3	MSTRG.844	chr1:36554486-36559533	+	6	3729	0	0	0	0	1.95486	0
MSTRG.853.1	MSTRG.853	chr1:36602718-36603445	+	2	255	0	0	0	0	1.0655	0.140759
MSTRG.855.1	MSTRG.855	chr1:36621802-36645939	-	17	2820	0.157265	1.59426	0.491304	1.5253	2.25578	1.79745
MSTRG.854.5	MSTRG.854	chr1:36621803-36645916	+	17	2796	1.36578	1.27036	1.13124	1.5134	1.60443	1.55622
MSTRG.855.2	MSTRG.855	chr1:36641877-36645329	-	9	1366	2.22839	0	0	0	0	0
MSTRG.855.3	MSTRG.855	chr1:36643519-36645620	-	8	1013	0	0	1.8699	0	0	0
MSTRG.850.2	MSTRG.850	chr1:36690033-36770951	+	13	4598	0.115946	2.6995	0.53973	1.57028	2.81449	11.1152
MSTRG.850.4	MSTRG.850	chr1:36690034-36770954	+	12	4408	22.39	8.23134	21.5337	11.4184	8.40715	1.64685
MSTRG.850.5	MSTRG.850	chr1:36690034-36770954	+	14	4995	0.579065	2.48574	6.87517	1.773	2.83616	2.50753
MSTRG.850.7	MSTRG.850	chr1:36690315-36770951	+	13	4913	6.56215	2.42126	5.66978	1.74923	0.380994	11.5103
MSTRG.856.1	MSTRG.856	chr1:36771988-36794854	+	17	4490	2.97845	3.21888	3.23354	0.797822	0	2.75976
MSTRG.860.2	MSTRG.860	chr1:36921373-36930023	-	5	727	0.535144	0.925414	1.0848	6.64662	7.93595	5.95131
MSTRG.860.4	MSTRG.860	chr1:36921374-36930009	-	7	846	11.4318	13.9445	15.2123	25.0125	25.5001	22.4959
MSTRG.861.1	MSTRG.861	chr1:36929408-36929969	+	2	267	0.500059	0	0	0	0.82051	1.16127
MSTRG.862.2	MSTRG.862	chr1:37920480-37940012	-	2	1302	0.714412	1.87459	0.58404	0.457008	0.293716	0.610248
MSTRG.862.1	MSTRG.862	chr1:37920480-37942906	-	4	4191	0.420056	0.354823	0.345525	0.501325	1.95082	1.38351
MSTRG.863.3	MSTRG.863	chr1:37940181-37949961	+	6	2634	6.93261	6.78343	5.94377	6.39058	7.5477	8.0487
MSTRG.866.2	MSTRG.866	chr1:38002291-38019891	-	5	2259	5.44045	0	4.45966	0	6.81595	5.78555
MSTRG.870.4	MSTRG.870	chr1:38147242-38156154	-	5	2653	2.06587	3.65451	3.40689	1.81401	1.34051	0.04855
MSTRG.870.1	MSTRG.870	chr1:38147242-38156192	-	5	2473	0.880699	1.07019	0.627042	0.205752	0.279533	0.148634
MSTRG.870.2	MSTRG.870	chr1:38147242-38156718	-	6	3080	0.122522	0.212077	0.248058	3.6535	5.48801	1.28285
MSTRG.870.3	MSTRG.870	chr1:38147242-38157877	-	6	2571	5.81456	3.75842	2.84909	2.04376	1.43004	0.105894
MSTRG.872.3	MSTRG.872	chr1:38260155-38271473	+	3	6318	2.42853	2.17542	2.13919	1.2752	1.0285	1.01761
MSTRG.879.1	MSTRG.879	chr1:38326369-38364276	-	2	1249	0	0	2.12338	0	0	0
MSTRG.884.3	MSTRG.884	chr1:38435059-38455645	-	12	1862	7.76771	4.25101	6.21101	4.99522	7.55919	5.58488
MSTRG.885.1	MSTRG.885	chr1:38456792-38458550	-	1	1759	0.853392	0.891078	1.31852	0.753163	0.451624	1.35914
MSTRG.887.1	MSTRG.887	chr1:38459854-38462279	-	1	2426	1.59156	1.40906	1.58864	0.919198	0.479636	1.09619
MSTRG.888.4	MSTRG.888	chr1:38463017-38471174	-	5	899	5.78807	1.16895	2.90118	5.66016	2.82411	5.01449
MSTRG.893.1	MSTRG.893	chr1:39324813-39331063	+	2	5435	1.60233	1.3802	1.55309	0.392318	0.17045	0.585484
MSTRG.889.1	MSTRG.889	chr1:39456575-39471731	+	5	2460	0	0	0	1.13523	0	0
MSTRG.891.1	MSTRG.891	chr1:39492026-39500287	-	3	487	0.925844	0.891312	0.670659	1.65711	1.93227	0.92521
MSTRG.901.6	MSTRG.901	chr1:39571083-39907961	+	70	12818	0.33092	1.25378	0.557073	0.283771	0.277404	0
MSTRG.901.9	MSTRG.901	chr1:39571101-39907961	+	71	12809	2.5844	1.83771	1.72967	3.42944	1.16739	3.70989
MSTRG.901.8	MSTRG.901	chr1:39571101-39952659	+	93	17603	9.36977	4.40667	8.06253	9.11857	8.39991	8.11867
MSTRG.901.25	MSTRG.901	chr1:39875175-39907961	+	20	8085	0.014775	0.021105	4.51575	2.89594	2.23432	3.79576
MSTRG.900.1	MSTRG.900	chr1:40042089-40042404	+	1	316	0.582961	1.07797	1.47511	1.02995	1.15958	1.08753
MSTRG.907.5	MSTRG.907	chr1:40204558-40219116	+	10	1002	2.38109	3.49908	1.81844	1.36124	3.45571	0.402472
MSTRG.928.1	MSTRG.928	chr1:40533376-40536185	-	4	407	0.731459	0.662053	0.619067	1.64718	3.30593	1.2675
MSTRG.929.12	MSTRG.929	chr1:40538610-40562917	-	10	1921	0	0.000208	0	0	2.73902	0
MSTRG.926.3	MSTRG.926	chr1:40915779-40929352	+	5	1985	4.26914	2.40278	2.68299	3.39952	2.44909	3.48756
MSTRG.926.5	MSTRG.926	chr1:40916337-40929386	+	5	2030	1.65721	3.37935	2.12734	2.82301	1.92888	2.33359
MSTRG.937.2	MSTRG.937	chr1:41151085-41157738	-	2	2301	1.72245	1.2453	1.83025	0.392423	0.297401	0.811523
MSTRG.942.1	MSTRG.942	chr1:41468810-41474373	-	4	223	0	0	1.18524	0.219349	0	0
MSTRG.950.1	MSTRG.950	chr1:41487879-41491308	+	1	3430	0.663528	1.08995	0.799792	0.183268	0.050744	0.405335
MSTRG.952.1	MSTRG.952	chr1:41510143-41513032	+	1	2890	0.998714	1.48323	0.981237	0.388575	0.262282	0.581866
MSTRG.953.1	MSTRG.953	chr1:41515889-41516864	+	1	976	0.836137	1.1509	1.14454	0.308815	0.085871	0.701484
MSTRG.954.1	MSTRG.954	chr1:41523278-41523555	+	1	278	0.114876	1.12304	1.31501	0.102497	0	0.809017
MSTRG.963.1	MSTRG.963	chr1:43148074-43167998	-	8	1516	5.37995	7.59011	5.56654	8.41883	9.73779	6.96964
MSTRG.966.1	MSTRG.966	chr1:43232940-43255467	+	6	772	0.556096	1.6674	0.294244	1.05201	0	0.51226
MSTRG.973.1	MSTRG.973	chr1:43396439-43424541	+	4	593	1.47353	1.22552	0.816251	1.49411	1.56353	0.898592
MSTRG.978.1	MSTRG.978	chr1:43630079-43636474	+	6	557	0.440863	1.162	0.845902	0.866246	1.53162	0.262436
MSTRG.983.1	MSTRG.983	chr1:43824668-43825057	-	2	230	0.218081	0	0	0.594658	1.20843	0.240729
MSTRG.984.1	MSTRG.984	chr1:43825186-43825650	-	3	232	0.10499	0	0	0.281119	1.12744	0.058429
MSTRG.985.1	MSTRG.985	chr1:43826867-43828809	-	3	356	0.275708	0	0	0.318824	0.907196	1.14393
MSTRG.987.3	MSTRG.987	chr1:43850397-43855455	-	6	2473	5.04239	4.52186	3.11201	4.50518	4.09003	5.69411
MSTRG.989.15	MSTRG.989	chr1:43909289-43916579	+	11	2033	1.83272	1.48473	0	0.901015	0	0
MSTRG.992.2	MSTRG.992	chr1:43994233-44088534	+	32	6298	1.07473	0	0.267813	0.137716	0	0
MSTRG.992.8	MSTRG.992	chr1:43996574-44088028	+	31	6451	8.63384	11.3077	5.35133	2.5139	0	0
MSTRG.992.9	MSTRG.992	chr1:43996574-44089325	+	32	8327	2.95942	2.32713	3.80557	2.12335	0.016768	0
MSTRG.992.7	MSTRG.992	chr1:43996574-44089337	+	33	7669	0.750606	0	0.731635	0.334135	0	2.81272
MSTRG.993.1	MSTRG.993	chr1:44063467-44064411	-	2	279	1.33347	0.406283	0.334651	0	0.947292	0
MSTRG.994.1	MSTRG.994	chr1:44088382-44088819	-	1	438	0.413169	1.08598	1.02818	0.663921	0.936268	0.630742
MSTRG.999.1	MSTRG.999	chr1:44173539-44174643	+	1	1105	1.54677	1.34144	0.898321	0.428055	0.214857	0.873406
MSTRG.1007.3	MSTRG.1007	chr1:44444909-44456840	+	7	2271	7.19335	14.0203	13.2858	10.2865	0.105407	9.30965
MSTRG.1010.1	MSTRG.1010	chr1:44458234-44458876	-	1	643	0.917566	1.13414	1.99713	0.274256	0.438921	1.50392
MSTRG.1009.7	MSTRG.1009	chr1:44474187-44497101	-	5	864	0.473147	0	0	1.71066	1.51628	1.20377
MSTRG.1013.1	MSTRG.1013	chr1:44554332-44555105	+	1	774	1.37162	0.886704	0.522881	0.216589	0	0.453133
MSTRG.1014.1	MSTRG.1014	chr1:44557939-44558999	+	1	1061	1.30193	0.658701	0.914071	0.04476	0.054008	0.375547
MSTRG.1017.1	MSTRG.1017	chr1:44684377-44684901	-	2	225	0.562129	1.06089	1.51557	0	0	0.718717
MSTRG.1018.3	MSTRG.1018	chr1:44686742-44820880	-	8	3650	5.78219	5.08559	4.2252	2.85726	2.65979	2.04075
MSTRG.1018.2	MSTRG.1018	chr1:44686742-44820932	-	7	1382	1.3314	1.12125	0.923772	1.6282	2.12192	1.22359
MSTRG.1018.1	MSTRG.1018	chr1:44686742-44821189	-	7	1271	2.56965	2.64273	3.14769	1.89497	0.183229	2.9299
MSTRG.1018.7	MSTRG.1018	chr1:44686763-44820910	-	8	1617	1.67749	1.83126	1.30681	1.7713	2.64561	0.445459
MSTRG.1023.8	MSTRG.1023	chr1:45097404-45117395	+	12	2151	3.53304	0.414039	0	0	0	0
MSTRG.1025.1	MSTRG.1025	chr1:45097642-45097871	-	1	230	1.30692	2.34814	4.26625	1.2375	2.7626	1.05118
MSTRG.1023.12	MSTRG.1023	chr1:45097647-45117395	+	11	2059	3.1483	11.7785	5.00661	12.1317	5.5971	6.77418
MSTRG.1023.14	MSTRG.1023	chr1:45097656-45117395	+	11	1972	4.59269	3.64278	2.32533	0.641827	3.24078	3.33188
MSTRG.1022.1	MSTRG.1022	chr1:45203734-45204926	+	1	1193	3.65783	3.43271	3.20339	0.67805	1.1171	1.87597
MSTRG.1030.2	MSTRG.1030	chr1:45224796-45244410	-	8	1046	5.06548	5.363	5.28808	4.49132	5.21929	3.17153
MSTRG.1030.4	MSTRG.1030	chr1:45241256-45244410	-	6	633	0.53874	3.96597	3.92701	1.51593	2.18647	0.826518
MSTRG.1036.1	MSTRG.1036	chr1:45315633-45452282	-	13	1979	1.83218	0	2.59255	1.32161	0	3.46795
MSTRG.1041.1	MSTRG.1041	chr1:45781945-45788183	+	1	6239	0.008618	0.018541	0	1.86712	1.13205	4.2341
MSTRG.1050.1	MSTRG.1050	chr1:45965725-45988550	+	9	3954	1.02213	1.4777	0.738333	0.987503	1.37412	1.25144
MSTRG.1050.3	MSTRG.1050	chr1:45965983-45978889	+	5	4632	1.6472	0	0	0.807208	0.609723	0.749264
MSTRG.1051.3	MSTRG.1051	chr1:45976723-45988719	-	6	1159	59.9684	58.8953	267.053	64.4663	64.7311	520.657
MSTRG.1052.10	MSTRG.1052	chr1:46016740-46035717	+	9	2250	3.96958	4.53788	2.56268	4.67102	6.09501	5.7207
MSTRG.1052.8	MSTRG.1052	chr1:46016740-46035721	+	8	965	1.93426	1.60561	1.47447	1.78849	2.35703	2.51863
MSTRG.1052.9	MSTRG.1052	chr1:46016740-46035721	+	9	1093	1.40887	1.18414	1.08223	1.27529	1.63814	1.23986
MSTRG.1058.1	MSTRG.1058	chr1:46044313-46046028	-	1	1716	1.26614	1.4254	0.834866	0.523424	0.27044	0.792396
MSTRG.1059.1	MSTRG.1059	chr1:46046408-46050342	-	1	3935	1.95017	0.206233	0.980758	0.579576	0.529823	0.709058
MSTRG.1059.2	MSTRG.1059	chr1:46046487-46049979	-	2	2871	0	1.63721	0.985051	0	0	0
MSTRG.1060.18	MSTRG.1060	chr1:46049737-46083885	+	14	1429	34.7433	25.8732	37.1056	31.914	38.5213	17.0564
MSTRG.1061.1	MSTRG.1061	chr1:46080822-46084045	-	6	796	1.25022	1.11614	1.09568	0.749142	1.39023	1.12935
MSTRG.1062.1	MSTRG.1062	chr1:46092976-46126061	-	12	2840	0.237101	0	0.631189	0.488276	0.373694	1.24106
MSTRG.1062.5	MSTRG.1062	chr1:46093629-46152208	-	12	2892	0	0	0	2.21709	0	0
MSTRG.1062.8	MSTRG.1062	chr1:46095260-46152818	-	11	2511	3.01329	2.3308	4.63271	3.1716	4.09337	2.82141
MSTRG.1065.2	MSTRG.1065	chr1:46153868-46159517	+	3	837	4.50909	3.31448	2.53674	0.93933	0.821957	0.808298
MSTRG.1067.9	MSTRG.1067	chr1:46487637-46501793	+	19	4083	1.92868	2.71091	3.95683	3.13727	3.57555	2.42596
MSTRG.1073.1	MSTRG.1073	chr1:46601430-46601735	+	1	306	1.50414	1.76304	1.48661	1.75113	3.11979	2.25488
MSTRG.1075.4	MSTRG.1075	chr1:46654356-46664115	-	23	2528	12.483	14.8319	10.9496	13.3476	11.8035	6.19843
MSTRG.1075.5	MSTRG.1075	chr1:46654356-46664115	-	22	2679	8.81138	4.92911	5.33404	5.2817	9.08307	12.617
MSTRG.1079.1	MSTRG.1079	chr1:46745912-46755165	+	1	9254	1.31084	1.01591	1.30918	0.243797	0.203332	0.988325
MSTRG.1080.1	MSTRG.1080	chr1:46755422-46756311	+	1	890	1.43915	1.15583	1.43419	0.458715	0.064385	1.17042
MSTRG.1081.1	MSTRG.1081	chr1:46757912-46758571	+	1	660	1.74084	1.24971	1.20485	0.496007	0.220009	1.06917
MSTRG.1082.1	MSTRG.1082	chr1:46759638-46765123	+	1	5486	1.42222	1.28032	1.3648	0.506266	0.333183	1.12173
MSTRG.1083.1	MSTRG.1083	chr1:46767180-46767440	+	1	261	0	0	0.201055	0	1.1112	0.093632
MSTRG.1084.1	MSTRG.1084	chr1:46768819-46782448	+	5	744	17.4522	1.99807	3.82501	0.088272	0	0.005996
MSTRG.1084.2	MSTRG.1084	chr1:46768907-46782448	+	5	625	0	0	0	0	11.4727	0
MSTRG.1085.1	MSTRG.1085	chr1:46769337-46782448	-	4	570	1.50672	1.76671	2.31972	2.21509	2.42055	1.53884
MSTRG.1088.1	MSTRG.1088	chr1:46817590-46831592	+	2	325	0.661749	1.13204	1.0271	0.378896	0.35863	0.460743
MSTRG.1086.1	MSTRG.1086	chr1:46980202-46981830	+	1	1629	1.09286	0.89023	1.26806	0.929783	1.15329	1.19242
MSTRG.1093.2	MSTRG.1093	chr1:47140855-47184736	-	10	5551	2.17968	14.0701	10.7406	17.8073	19.1076	18.7086
MSTRG.1101.1	MSTRG.1101	chr1:47901261-47903274	-	1	2014	1.80398	0.963046	1.43426	0.685627	0.522496	1.08837
MSTRG.1106.1	MSTRG.1106	chr1:48674729-48679346	-	3	686	2.00994	0.7513	1.28655	0.287767	0.243777	0.124684
MSTRG.1112.1	MSTRG.1112	chr1:50883222-50889172	-	3	3141	1.56963	0.000739	1.29474	1.13375	1.26937	1.64978
MSTRG.1112.4	MSTRG.1112	chr1:50883224-50889172	-	3	1989	0	0	1.98971	0	0	0
MSTRG.1115.1	MSTRG.1115	chr1:51439736-51439949	-	1	214	0.077567	0	0.397752	1.14139	0.218588	0.036579
MSTRG.1116.1	MSTRG.1116	chr1:51478458-51479114	+	1	657	1.20449	0.276757	0.119673	0	0	0
MSTRG.1127.1	MSTRG.1127	chr1:51752875-51796236	-	18	2775	1.47049	0.094742	0.362806	1.31278	0.206728	0.398778
MSTRG.1129.3	MSTRG.1129	chr1:51819957-51984926	-	25	5240	19.6414	1.82043	18.6933	11.8398	11.6158	2.95289
MSTRG.1141.1	MSTRG.1141	chr1:52163125-52344477	-	32	3686	0	8.31742	0	0	0	0
MSTRG.1146.1	MSTRG.1146	chr1:52305934-52306149	+	1	216	0.522068	0.822545	0.832305	0.766583	0.62984	1.28696
MSTRG.1135.5	MSTRG.1135	chr1:52497141-52521843	-	4	3130	4.52743	4.08869	4.70025	2.97696	1.78657	2.73218
MSTRG.1158.1	MSTRG.1158	chr1:52813239-52815869	-	1	2631	1.23542	1.18671	0.870177	0.338441	0.133717	0.60223
MSTRG.1157.10	MSTRG.1157	chr1:52820559-52831846	-	21	2286	0	0	0	0	0	3.18323
MSTRG.1167.3	MSTRG.1167	chr1:52838520-52860286	-	13	2259	0	3.92528	0.881928	1.24761	0	1.27022
MSTRG.1168.4	MSTRG.1168	chr1:52870300-52886511	+	10	5231	13.0528	10.3615	16.1309	13.9458	13.085	12.8114
MSTRG.1169.8	MSTRG.1169	chr1:52896798-52991602	-	28	4140	3.4248	3.54839	2.93962	4.1684	1.98363	3.41339
MSTRG.1169.10	MSTRG.1169	chr1:52896919-52991602	-	26	3998	4.44871	3.11017	3.39357	2.90351	1.66854	2.73156
MSTRG.1169.14	MSTRG.1169	chr1:52911459-52991602	-	23	3391	3.52596	3.43439	2.89406	2.84523	1.88623	4.57472
MSTRG.1169.22	MSTRG.1169	chr1:52943410-52991602	-	10	1445	0.677433	0.801656	1.18606	1.63794	0.70349	0.994874
MSTRG.1160.1	MSTRG.1160	chr1:53148338-53148567	-	1	230	0.078446	0	0.206025	1.27741	0.311005	0.124515
MSTRG.1163.1	MSTRG.1163	chr1:53212114-53215413	-	1	3300	2.10618	1.88089	1.82438	2.02787	1.98339	1.89424
MSTRG.1175.6	MSTRG.1175	chr1:53308553-53369442	+	12	13000	0.325271	2.14892	2.21031	2.02548	1.49788	1.82449
MSTRG.1177.11	MSTRG.1177	chr1:53361911-53392884	-	10	1561	1.30455	1.76547	1.83741	0.662966	0.220215	0.59292
MSTRG.1185.1	MSTRG.1185	chr1:53458367-53458842	-	1	476	0.260785	0.196686	0.472678	1.05539	1.58772	1.11626
MSTRG.1192.7	MSTRG.1192	chr1:53712240-53732261	-	12	2098	0.706599	0.903864	1.1216	1.30827	1.05253	1.38944
MSTRG.1192.6	MSTRG.1192	chr1:53712240-53793686	-	18	2871	0.649791	0.350459	0.427571	0.928475	1.56526	2.50256
MSTRG.1192.12	MSTRG.1192	chr1:53716437-53793686	-	17	2355	0.179265	0.289166	0.380485	0.511121	1.08475	0.2603
MSTRG.1187.2	MSTRG.1187	chr1:54231136-54304136	-	17	4613	19.8443	17.2084	20.241	20.9056	14.4654	22.5331
MSTRG.1197.2	MSTRG.1197	chr1:54317406-54355453	-	12	1855	4.66569	3.85469	0.782134	5.96719	5.47637	4.98246
MSTRG.1198.3	MSTRG.1198	chr1:54387235-54412016	-	6	646	33.2977	24.9031	22.6943	26.5829	33.5795	25.146
MSTRG.1199.5	MSTRG.1199	chr1:54412031-54426141	+	3	792	2.91475	5.36733	3.57233	8.86611	8.01794	9.03097
MSTRG.1199.4	MSTRG.1199	chr1:54412031-54433406	+	8	1189	3.06219	2.92642	2.16022	3.96154	3.22647	4.67752
MSTRG.1200.4	MSTRG.1200	chr1:54497349-54519111	-	8	1343	31.2702	25.9313	27.5632	13.0169	28.2726	24.1034
MSTRG.1200.5	MSTRG.1200	chr1:54497349-54519111	-	8	1537	1.53826	4.83397	1.20329	3.06439	8.41065	7.8149
MSTRG.1200.9	MSTRG.1200	chr1:54497692-54519078	-	6	1122	9.58904	10.5935	12.1301	46.6785	51.0677	38.952
MSTRG.1200.8	MSTRG.1200	chr1:54497692-54519111	-	8	1356	3.46392	3.48642	4.05063	5.58446	5.43134	2.57521
MSTRG.1202.1	MSTRG.1202	chr1:54518767-54519077	+	1	311	0.087022	0.063442	0.726277	1.40994	1.03596	0.3401
MSTRG.1212.1	MSTRG.1212	chr1:54708931-54722818	+	4	205	0.20595	0	0.510243	0.675671	2.34269	1.54415
MSTRG.1214.1	MSTRG.1214	chr1:54871867-54872097	+	1	231	0.203859	0.202647	0	0.190508	1.29516	0.240513
MSTRG.1217.19	MSTRG.1217	chr1:55181510-55207980	+	9	1948	1.63469	6.6427	3.01938	6.47457	2.57066	5.17732
MSTRG.1218.1	MSTRG.1218	chr1:55505221-55540374	+	12	13596	2.50388	2.70689	2.09185	4.79099	4.38682	7.12815
MSTRG.1219.1	MSTRG.1219	chr1:55517960-55518441	-	2	244	0.218878	0.527983	0.439476	0.180358	1.51133	0.413144
MSTRG.1220.2	MSTRG.1220	chr1:55532035-55600088	-	41	7465	0	1.00932	0	0	0	0
MSTRG.1220.3	MSTRG.1220	chr1:55532035-55600089	-	41	7470	3.69295	0.932272	2.37619	1.71806	2.00413	4.11238
MSTRG.1250.17	MSTRG.1250	chr1:58946550-59012378	-	9	1721	4.3103	3.43899	4.76176	10.515	9.17418	10.5857
MSTRG.1232.2	MSTRG.1232	chr1:59041097-59043010	-	2	1666	1.6863	2.717	1.31697	0.902948	1.03134	1.29676
MSTRG.1232.3	MSTRG.1232	chr1:59041099-59043148	-	2	1952	0	8.93846	0	0	0	0
MSTRG.1233.1	MSTRG.1233	chr1:59041706-59225295	+	9	2795	0.135136	0.059141	1.01305	0.033023	1.24849	0.132949
MSTRG.1233.2	MSTRG.1233	chr1:59041706-59225910	+	6	2569	1.98637	2.95251	3.59288	0.703335	0.162786	0.851713
MSTRG.1233.4	MSTRG.1233	chr1:59041821-59225295	+	8	2168	2.72113	0	0	0.567935	0	2.08146
MSTRG.1233.3	MSTRG.1233	chr1:59041821-59238447	+	8	4705	3.96897	3.65667	3.00337	0.746099	0.067836	0
MSTRG.1235.3	MSTRG.1235	chr1:59120423-59165752	-	18	7658	0.852182	0.496245	0.436307	1.44746	1.12005	1.54941
MSTRG.1237.1	MSTRG.1237	chr1:59226164-59238562	+	1	12399	1.62398	1.46296	0.41983	0.590455	0.248437	0.973492
MSTRG.1233.8	MSTRG.1233	chr1:59226629-59238497	+	3	9372	1.75046	1.58873	1.16672	0	0	0
MSTRG.1233.9	MSTRG.1233	chr1:59226629-59238497	+	2	8959	1.061	0.897215	0.647466	0.169844	0	0.985706
MSTRG.1231.1	MSTRG.1231	chr1:59247875-59248105	+	1	231	0.370226	1.55334	0.776467	1.54531	0.648004	1.13149
MSTRG.1239.1	MSTRG.1239	chr1:59250817-59281886	+	2	1108	1.23058	0.81214	0.931042	1.13968	1.2187	1.06782
MSTRG.1263.1	MSTRG.1263	chr1:61523266-61523578	-	1	313	0.579901	0.536428	1.47579	0.65596	1.42351	1.22849
MSTRG.1272.9	MSTRG.1272	chr1:62330063-62629324	+	25	5655	2.64944	2.80775	2.51864	0.038773	1.01707	1.16424
MSTRG.1268.1	MSTRG.1268	chr1:62702032-62702286	-	1	255	0.111086	0.215434	0.719906	0.628855	1.15798	0.646142
MSTRG.1283.4	MSTRG.1283	chr1:62902326-62917473	+	9	4052	59.1242	52.568	18.3678	62.177	12.4052	57.2514
MSTRG.1279.1	MSTRG.1279	chr1:63786555-63788107	-	3	1176	2.84599	3.55081	3.60482	5.18783	4.25426	3.14451
MSTRG.1279.7	MSTRG.1279	chr1:63786585-63788107	-	4	775	2.60874	0	0	0	1.85145	0
MSTRG.1296.5	MSTRG.1296	chr1:63906471-63988872	-	9	4312	7.3443	6.76723	6.96405	4.4144	2.75597	4.9981
MSTRG.1297.2	MSTRG.1297	chr1:63989061-64003086	+	7	3822	2.64389	1.83461	2.22668	1.55724	1.4381	1.61163
MSTRG.1300.1	MSTRG.1300	chr1:64052526-64055144	-	1	2619	1.33174	1.15559	0.886427	0.248421	0.072411	0.24064
MSTRG.1301.1	MSTRG.1301	chr1:64055437-64056258	-	1	822	0.742559	1.16085	0.760086	0.12768	0.057856	0.168625
MSTRG.1302.1	MSTRG.1302	chr1:64058947-64123059	+	11	4036	0.271919	0.166044	0.133595	8.7074	6.7465	3.1584
MSTRG.1282.1	MSTRG.1282	chr1:64818864-64819227	-	1	364	3.13863	1.98781	2.94252	6.86997	5.5364	7.92933
MSTRG.1305.4	MSTRG.1305	chr1:65309779-65432187	-	17	2617	3.73456	3.62035	3.34019	5.06308	5.45401	5.12564
MSTRG.1314.8	MSTRG.1314	chr1:65886393-65901690	+	5	4412	0	0	4.10401	0	0	0
MSTRG.1313.1	MSTRG.1313	chr1:66108926-66113380	-	2	2345	0.113399	0.078494	0.124341	2.00369	1.2011	4.27894
MSTRG.1313.2	MSTRG.1313	chr1:66108926-66113380	-	3	936	0	0	0	1.71063	0.444392	1.22139
MSTRG.1313.3	MSTRG.1313	chr1:66108931-66113376	-	3	924	0	0	0	0	1.37824	1.72389
MSTRG.1318.1	MSTRG.1318	chr1:66922000-66947043	-	3	2170	1.0797	1.21233	1.21808	0	0	0.08706
MSTRG.1318.2	MSTRG.1318	chr1:66922000-67030046	-	5	5102	0.670909	0.496986	1.28141	0.351713	0.072479	0.369711
MSTRG.1325.10	MSTRG.1325	chr1:67398335-67453713	+	15	4824	0.074364	0.04757	0.194314	0	0	2.22876
MSTRG.1326.1	MSTRG.1326	chr1:67421021-67519782	-	13	6144	2.39335	0	0	0	0	0
MSTRG.1326.2	MSTRG.1326	chr1:67421021-67519782	-	15	5653	1.70939	0	0	0	0	0
MSTRG.1325.13	MSTRG.1325	chr1:67424594-67452353	+	10	2816	1.04819	0	0	0	0	0
MSTRG.1325.12	MSTRG.1325	chr1:67424594-67453713	+	10	4189	0	5.50033	0	0	0	0
MSTRG.1327.1	MSTRG.1327	chr1:67868042-67896055	-	9	5278	7.52796	0.008833	0.08533	0	0	0.098731
MSTRG.1327.2	MSTRG.1327	chr1:67873493-67896082	-	9	6451	6.46587	11.27	10.2245	5.26477	5.14154	4.76242
MSTRG.1328.1	MSTRG.1328	chr1:67878766-67880991	+	2	324	0.789088	1.35345	0.576343	0.444609	0.674958	0.856795
MSTRG.1330.1	MSTRG.1330	chr1:67885736-67896074	+	6	998	1.95125	2.76082	1.64963	1.53811	1.96724	1.07953
MSTRG.1332.1	MSTRG.1332	chr1:68150895-68151163	-	1	269	1.16372	1.71863	0.583922	0.154769	1.07018	0.624579
MSTRG.1333.1	MSTRG.1333	chr1:68153607-68153847	-	1	241	0.744915	0.734412	1.73027	1.30187	1.40317	0.815184
MSTRG.1334.1	MSTRG.1334	chr1:68167149-68298425	-	4	5204	41.4911	46.3247	33.7598	21.1099	6.60076	16.493
MSTRG.1341.1	MSTRG.1341	chr1:68564026-68698206	-	12	2151	0.501881	4.57245	17.2955	0.330672	15.9464	14.8734
MSTRG.1341.2	MSTRG.1341	chr1:68564137-68698206	-	11	1903	0	7.2048	0	0	0	8.26042
MSTRG.1344.3	MSTRG.1344	chr1:68851727-68857636	+	2	3174	0	0	0.036542	0	0	3.13648
MSTRG.1344.1	MSTRG.1344	chr1:68851727-68857664	+	2	379	0	0.238704	0.819574	2.84907	2.29069	4.28912
MSTRG.1344.2	MSTRG.1344	chr1:68851727-68914511	+	4	977	0.305819	0.395699	0.292459	2.26161	2.87278	3.63782
MSTRG.1344.8	MSTRG.1344	chr1:68851727-68949222	+	6	7156	0	0	0.012912	9.9739	2.22832	7.4276
MSTRG.1344.10	MSTRG.1344	chr1:68852036-68914509	+	4	2958	0	0	0	2.79521	3.66217	2.27647
MSTRG.1346.3	MSTRG.1346	chr1:68941257-68949109	-	6	3038	1.04589	0.074012	0.091175	0.030034	2.41204	0.031383
MSTRG.1357.1	MSTRG.1357	chr1:70610488-70622402	-	6	1884	0.030115	0.028042	0.013973	3.37349	9.73164	9.76717
MSTRG.1357.2	MSTRG.1357	chr1:70610488-70671261	-	13	2586	0.631786	5.32803	6.90394	1.28929	4.12491	3.35383
MSTRG.1359.5	MSTRG.1359	chr1:70687079-70716629	+	12	1855	1.54472	0.732425	1.48103	1.25556	2.40456	2.62248
MSTRG.1359.8	MSTRG.1359	chr1:70687163-70717680	+	13	3685	1.6138	17.0329	1.64284	18.2921	16.8254	20.4681
MSTRG.1359.10	MSTRG.1359	chr1:70687407-70716629	+	14	1572	3.18256	1.30789	9.00407	1.10764	0.279003	2.68182
MSTRG.1361.2	MSTRG.1361	chr1:70703140-70716675	-	7	1017	0.977119	0.550917	1.02578	1.69424	2.89796	0.892099
MSTRG.1361.1	MSTRG.1361	chr1:70703140-70716685	-	7	1030	1.23379	1.5504	1.78356	1.75919	0.635408	1.81173
MSTRG.1350.3	MSTRG.1350	chr1:70820511-70833594	+	4	953	0.656743	0.444031	0.896551	2.30675	1.87315	1.49134
MSTRG.1350.6	MSTRG.1350	chr1:70820519-70833594	+	4	814	0.111295	0.059209	0.27816	0.293014	1.49289	0.013368
MSTRG.1350.9	MSTRG.1350	chr1:70820538-70833594	+	4	698	2.71087	3.46795	2.57584	1.1252	2.24824	0.949712
MSTRG.1362.4	MSTRG.1362	chr1:70877066-70905253	+	12	1767	12.7287	2.40258	1.95108	3.96302	2.70676	3.30006
MSTRG.1364.2	MSTRG.1364	chr1:71528980-71546694	-	10	3884	2.3967	4.45883	6.16573	1.89259	2.37767	4.40892
MSTRG.1364.6	MSTRG.1364	chr1:71530737-71546694	-	10	2568	15.5686	11.4071	15.9207	10.0077	6.2065	18.817
MSTRG.1364.8	MSTRG.1364	chr1:71530770-71546694	-	11	1067	8.38136	6.30497	6.95123	4.12644	3.87644	3.62291
MSTRG.1366.1	MSTRG.1366	chr1:73456863-73457082	-	1	220	0.121378	0.521396	0.591923	0.715229	0.757482	2.39463
MSTRG.1380.1	MSTRG.1380	chr1:75169746-75198706	-	9	2004	1.86849	2.01783	2.64969	4.77365	5.24581	3.7476
MSTRG.1380.8	MSTRG.1380	chr1:75175793-75198702	-	5	531	3.15606	2.1628	1.04583	3.77537	5.87539	2.67784
MSTRG.1381.3	MSTRG.1381	chr1:75198931-75232362	+	7	1210	4.7605	3.51339	1.86756	0.812317	1.57064	1.50519
MSTRG.1386.1	MSTRG.1386	chr1:76208651-76208924	-	1	274	2.04461	4.72893	2.59283	2.99384	2.35098	3.57457
MSTRG.1385.23	MSTRG.1385	chr1:76251916-76257203	+	7	856	3.10106	2.09573	3.09135	2.06722	1.32462	1.62015
MSTRG.1383.1	MSTRG.1383	chr1:77594799-77595353	+	2	226	0	0	0	0	1.49006	0
MSTRG.1383.2	MSTRG.1383	chr1:77594799-77595353	+	2	481	0	2.67932	0	1.57815	0	0
MSTRG.1388.5	MSTRG.1388	chr1:78030191-78098561	-	11	3380	3.36475	2.63777	3.18162	2.43756	0.001324	5.82509
MSTRG.1388.7	MSTRG.1388	chr1:78030573-78149088	-	15	2740	12.3433	18.6437	14.1755	13.1619	7.66757	4.00885
MSTRG.1388.9	MSTRG.1388	chr1:78046703-78098561	-	5	1497	3.16581	0.210342	0.055249	0.20619	0	1.21032
MSTRG.1388.11	MSTRG.1388	chr1:78047503-78098561	-	5	1451	0.055013	2.7546	0.988813	2.28356	1.50331	0
MSTRG.1391.10	MSTRG.1391	chr1:78177470-78225496	-	21	2564	17.25	5.0386	6.88635	3.5713	2.96848	6.4442
MSTRG.1391.11	MSTRG.1391	chr1:78177470-78225496	-	20	2470	0	0	0.703186	0.544385	1.08461	3.73531
MSTRG.1397.2	MSTRG.1397	chr1:78354200-78401655	+	9	1462	3.49395	0.861219	0.272141	0.833116	1.27293	1.69247
MSTRG.1397.5	MSTRG.1397	chr1:78354347-78408438	+	12	2060	0	0.6553	7.54999	0.688765	0	0.047501
MSTRG.1398.1	MSTRG.1398	chr1:78409740-78445129	-	22	4649	12.1626	15.3307	13.308	5.5331	5.15108	8.2017
MSTRG.1398.9	MSTRG.1398	chr1:78409741-78444770	-	22	4604	5.12494	7.79917	7.13014	2.98126	1.82563	3.49524
MSTRG.1398.11	MSTRG.1398	chr1:78414090-78444770	-	20	2375	42.909	30.194	42.9679	51.2445	54.1254	48.4616
MSTRG.1399.6	MSTRG.1399	chr1:78458111-78459860	+	2	1158	2.16546	1.12283	0.613987	0.119197	0.23362	0.404346
MSTRG.1408.6	MSTRG.1408	chr1:79115543-79129762	+	7	1383	7.70251	6.25351	4.89274	6.74084	10.2008	10.8668
MSTRG.1406.1	MSTRG.1406	chr1:79577157-79578675	-	1	1519	1.02281	0.797682	0.954348	1.10581	0.321039	0.567489
MSTRG.1405.1	MSTRG.1405	chr1:80162068-80167432	-	3	1540	0	0	0	1.63838	1.49255	2.59879
MSTRG.1409.1	MSTRG.1409	chr1:82533452-82533711	-	1	260	0.008823	0.006324	0.087549	0.324515	0.605063	1.2274
MSTRG.1410.1	MSTRG.1410	chr1:82535082-82535495	-	1	414	0.388019	0.192267	0.210042	2.00315	0.702544	2.99694
MSTRG.1411.1	MSTRG.1411	chr1:84524203-84524628	-	1	426	0	0	0	0.976742	1.44122	1.86082
MSTRG.1415.1	MSTRG.1415	chr1:84944958-84948648	-	3	343	0	0	0.461958	0	1.15751	0.52952
MSTRG.1424.7	MSTRG.1424	chr1:85116054-85156127	-	14	1874	0	0.004432	2.31142	2.95565	0	0
MSTRG.1424.8	MSTRG.1424	chr1:85116054-85156438	-	14	1882	1.30904	0	0	0	0	3.04272
MSTRG.1423.1	MSTRG.1423	chr1:85646366-85646588	-	1	223	0.606007	1.24042	0.222723	0.272404	0	0.095033
MSTRG.1429.4	MSTRG.1429	chr1:85784169-85930823	-	7	2733	1.88795	2.09737	0.982121	2.87971	0.743305	3.47108
MSTRG.1433.1	MSTRG.1433	chr1:86046444-86049645	+	3	2956	4.01512	6.82908	7.12331	0.664612	0.424088	8.89739
MSTRG.1437.4	MSTRG.1437	chr1:86814515-86861966	-	15	5217	1.48293	1.02858	3.21369	1.51679	0.716815	3.52269
MSTRG.1437.7	MSTRG.1437	chr1:86815778-86851227	-	14	3602	4.47723	3.91165	1.41006	13.6711	8.50942	1.02767
MSTRG.1437.19	MSTRG.1437	chr1:86826115-86862006	-	9	1261	3.81425	2.59314	1.83247	1.05076	1.33819	1.00197
MSTRG.1440.1	MSTRG.1440	chr1:87380331-87575632	+	7	6716	1.79661	1.18556	1.53196	1.74318	2.63296	2.04304
MSTRG.1438.3	MSTRG.1438	chr1:87796991-87811258	+	5	1282	0	1.03818	0	0	8.49368	0
MSTRG.1451.1	MSTRG.1451	chr1:89390042-89458459	-	14	1640	0	1.06696	0	0	0	0
MSTRG.1452.2	MSTRG.1452	chr1:89472362-89488434	-	11	2842	1.51357	1.27591	6.10045	0	0	4.65475
MSTRG.1454.1	MSTRG.1454	chr1:89568540-89591797	-	11	6124	0.342247	0	0.194869	2.27477	4.1709	4.50865
MSTRG.1454.2	MSTRG.1454	chr1:89568574-89591797	-	11	7341	0.357001	0.370913	0.173497	3.7169	2.59552	5.35822
MSTRG.1454.3	MSTRG.1454	chr1:89568808-89592598	-	13	6187	0.045752	0	0	0	3.72548	0.006263
MSTRG.1454.8	MSTRG.1454	chr1:89575870-89591797	-	9	1687	2.17079	0	0.595189	12.2364	2.8694	5.96877
MSTRG.1464.1	MSTRG.1464	chr1:90286976-90287759	-	1	784	0.967031	0.670855	1.30597	0.570335	1.34969	1.03059
MSTRG.1465.3	MSTRG.1465	chr1:90460693-90493785	+	13	2311	0	0	0	0	2.20409	0
MSTRG.1465.5	MSTRG.1465	chr1:90460696-90493785	+	11	2337	0	3.69349	2.49104	16.251	11.7437	15.4048
MSTRG.1465.6	MSTRG.1465	chr1:90460696-90493785	+	13	2338	0	0	4.96246	0	0	0
MSTRG.1466.3	MSTRG.1466	chr1:91380861-91487612	-	7	5684	10.478	9.14282	0	11.7338	11.8345	11.0955
MSTRG.1470.1	MSTRG.1470	chr1:91852780-91853143	-	1	364	158.415	421.204	326.818	364.425	322.648	304
MSTRG.1471.1	MSTRG.1471	chr1:91852783-91853109	+	1	327	0.185484	0.863163	1.2304	1.12795	1.04	1.04725
MSTRG.1472.3	MSTRG.1472	chr1:91966695-91991321	+	11	3133	0.630708	0.641281	0.705326	0.301981	3.01248	3.5053
MSTRG.1472.6	MSTRG.1472	chr1:91978684-91991321	+	4	2167	0.68359	0.323332	0.550564	2.43856	0.658623	1.43611
MSTRG.1472.7	MSTRG.1472	chr1:91978684-91991321	+	5	2317	9.27508	3.78439	4.70312	6.29603	3.62746	2.61618
MSTRG.1473.1	MSTRG.1473	chr1:92487322-92491501	-	1	4180	1.23679	0.894569	1.14686	0.367877	0.155833	0.348137
MSTRG.1477.1	MSTRG.1477	chr1:92539765-92540005	-	1	241	0.188662	1.65825	0.738423	0.859813	0.611411	0.363624
MSTRG.1480.4	MSTRG.1480	chr1:92712049-92764195	-	19	2030	4.35795	0.69147	1.89175	3.93827	3.58058	3.6343
MSTRG.1480.3	MSTRG.1480	chr1:92712049-92764533	-	17	1737	4.51235	6.92988	6.78028	5.62983	6.03052	5.69477
MSTRG.1480.6	MSTRG.1480	chr1:92712619-92764533	-	17	1708	1.28927	1.14069	0.858209	1.24696	1.53941	1.0249
MSTRG.1480.8	MSTRG.1480	chr1:92728422-92737209	-	9	716	0.773177	0	0.181147	1.47328	1.81498	0.488504
MSTRG.1480.9	MSTRG.1480	chr1:92728422-92764544	-	15	1438	0.801484	1.80026	1.31413	1.14911	0.985014	1.20973
MSTRG.1489.1	MSTRG.1489	chr1:92974253-93250658	-	19	7576	0.000298	0.000153	2.43639	3.10829	3.54678	1.7675
MSTRG.1489.6	MSTRG.1489	chr1:92974258-93131512	-	11	6207	0.00089	0	2.252	2.38837	0	3.104
MSTRG.1489.5	MSTRG.1489	chr1:92974258-93250681	-	19	7592	2.32358	2.37236	0.441138	0.94952	1.64293	1.33311
MSTRG.1489.7	MSTRG.1489	chr1:92974258-93250681	-	20	7627	2.38746	2.17216	0.454188	0.611188	0.780656	1.43722
MSTRG.1482.1	MSTRG.1482	chr1:93297582-93307419	+	8	978	337.234	357.078	346.615	289.751	359.738	302.582
MSTRG.1483.1	MSTRG.1483	chr1:93297607-93307481	-	8	1018	1.7962	2.95832	2.08345	1.5935	2.97658	2.08965
MSTRG.1502.4	MSTRG.1502	chr1:93646273-93744540	+	28	4545	2.76721	0.426443	0.595417	1.04485	0.721348	0.12162
MSTRG.1502.9	MSTRG.1502	chr1:93671112-93737859	+	21	4953	3.49376	0.786362	1.72433	2.05118	0.405752	1.41681
MSTRG.1502.10	MSTRG.1502	chr1:93671112-93744590	+	21	3613	1.75075	2.05053	0.856004	1.03321	0.664603	1.81251
MSTRG.1507.2	MSTRG.1507	chr1:93811492-93828140	+	3	3195	4.68188	4.71782	28.1647	21.0547	21.8522	16.9546
MSTRG.1507.3	MSTRG.1507	chr1:93811492-93835048	+	4	9946	0	0	0	1.02998	0	0
MSTRG.1507.4	MSTRG.1507	chr1:93811492-93835048	+	4	10043	0	0	0	1.40292	0	0
MSTRG.1507.5	MSTRG.1507	chr1:93811492-93835048	+	5	9822	0	0	0	1.0199	0	0
MSTRG.1497.1	MSTRG.1497	chr1:94023413-94023913	-	1	501	0.197353	0.408492	0.190216	0.098266	0	1.19279
MSTRG.1511.1	MSTRG.1511	chr1:94158723-94165428	+	5	1577	2.6445	2.7249	3.03207	3.90812	3.20392	2.98963
MSTRG.1512.1	MSTRG.1512	chr1:94168135-94175382	+	1	7248	0.849633	0.71001	0.825116	0.855341	0.745209	1.57003
MSTRG.1514.1	MSTRG.1514	chr1:94249121-94249681	-	1	561	0.819478	1.09407	1.16407	0.443015	0.444709	0.472407
MSTRG.1517.3	MSTRG.1517	chr1:94633025-94713326	-	23	10424	2.51613	3.13002	2.61378	1.67999	0.944701	3.40357
MSTRG.1517.4	MSTRG.1517	chr1:94633025-94713326	-	24	10424	1.02829	0.722402	0.484318	0.297509	1.8348	0.443302
MSTRG.1517.5	MSTRG.1517	chr1:94637307-94713326	-	22	5905	5.47434	0	4.20347	4.564	0	0
MSTRG.1523.4	MSTRG.1523	chr1:94898208-94984222	+	23	3408	0	0	1.40325	0	5.57989	0.117775
MSTRG.1523.5	MSTRG.1523	chr1:94914097-94984052	+	23	4111	0.107199	14.6636	14.6057	0.069277	0.095439	23.7206
MSTRG.1524.2	MSTRG.1524	chr1:94994866-95007315	-	7	2656	34.6835	29.134	30.4627	20.7389	17.9228	22.0934
MSTRG.1526.1	MSTRG.1526	chr1:95098890-95099430	-	1	541	0.28448	1.31543	0.265039	0.153999	0.048997	0.236448
MSTRG.1529.10	MSTRG.1529	chr1:95329754-95360609	+	6	935	0	0.535839	0.547489	3.28065	4.60316	3.04395
MSTRG.1531.1	MSTRG.1531	chr1:95392396-95392672	+	1	277	0	0.310055	0.657661	1.43442	1.65636	0.927043
MSTRG.1532.1	MSTRG.1532	chr1:95392958-95405459	+	3	1194	1.75756	1.45422	1.47297	0.665456	0	0.546398
MSTRG.1535.1	MSTRG.1535	chr1:95582894-95663163	+	7	7296	0.329385	0.211675	4.16789	2.92986	1.60557	0.212938
MSTRG.1535.13	MSTRG.1535	chr1:95699824-95712779	+	3	632	5.37775	5.35514	8.34158	0.954813	1.85131	1.62372
MSTRG.1534.1	MSTRG.1534	chr1:97144430-97145176	-	2	704	2.99896	0	0	0	0	0
MSTRG.1534.2	MSTRG.1534	chr1:97144430-97145176	-	2	689	2.23882	0	0	0	0	0
MSTRG.1540.7	MSTRG.1540	chr1:97187378-97279003	+	13	1665	0.740808	2.09403	2.17496	0.778538	0.502758	0.567416
MSTRG.1542.1	MSTRG.1542	chr1:98681141-98683019	+	1	1879	1.11866	0.870099	0.97979	0.075485	0.089207	0.105063
MSTRG.1552.2	MSTRG.1552	chr1:99127279-99226056	+	10	1854	5.38295	5.81856	3.14125	2.07014	2.64777	4.74792
MSTRG.1554.1	MSTRG.1554	chr1:99978202-99978496	+	1	295	0	0	0	0.609178	0.770316	2.06317
MSTRG.1556.1	MSTRG.1556	chr1:100172404-100232187	-	17	4089	2.24806	2.17478	1.79866	9.36184	7.86916	7.75815
MSTRG.1570.9	MSTRG.1570	chr1:100435569-100492028	+	8	4709	0	3.69974	0	0	0	2.6786
MSTRG.1570.26	MSTRG.1570	chr1:100435602-100491742	+	6	4534	1.81541	2.36093	4.42397	4.97872	2.34536	2.38362
MSTRG.1570.32	MSTRG.1570	chr1:100436009-100488803	+	7	1804	0.2066	1.83617	0.669266	0.122469	0.108128	1.45419
MSTRG.1570.33	MSTRG.1570	chr1:100436009-100488803	+	7	1825	0.100029	0.584142	0.403414	0.10999	0.049208	1.09415
MSTRG.1570.37	MSTRG.1570	chr1:100459102-100491742	+	6	4108	2.21802	0	0	0	0	0
MSTRG.1570.36	MSTRG.1570	chr1:100459102-100492028	+	6	3643	0.9761	0	0	1.8301	0.64657	0
MSTRG.1573.1	MSTRG.1573	chr1:100502193-100515474	-	2	1690	2.06167	2.1049	2.15432	0.88058	0.665684	0.891236
MSTRG.1570.40	MSTRG.1570	chr1:100503655-100548050	+	10	1733	0	0	0	0	5.77033	0
MSTRG.1570.42	MSTRG.1570	chr1:100524227-100548050	+	11	1609	0	2.73615	0	0	0	0.00663
MSTRG.1576.3	MSTRG.1576	chr1:100598721-100616053	+	11	3085	2.20835	1.30626	3.87637	2.31463	3.05436	1.59081
MSTRG.1558.2	MSTRG.1558	chr1:100652504-100715376	-	12	10728	4.29211	0	3.95183	0	0	0
MSTRG.1578.2	MSTRG.1578	chr1:101337943-101361484	-	6	3365	5.6056	5.88736	0.99232	11.6321	8.65109	1.73108
MSTRG.1578.3	MSTRG.1578	chr1:101337943-101362365	-	6	2794	0	0	0	0	0	13.3445
MSTRG.1588.12	MSTRG.1588	chr1:101455914-101491309	-	7	898	9.21605	3.74052	2.97155	4.4319	5.53585	4.61296
MSTRG.1583.1	MSTRG.1583	chr1:101701311-101702118	+	1	808	0.066543	0	0.049523	1.1559	1.29488	1.10607
MSTRG.1587.1	MSTRG.1587	chr1:102251818-102252843	-	2	957	2.83522	0.906472	1.26925	0.539721	0.754428	0.664978
MSTRG.1587.2	MSTRG.1587	chr1:102251819-102252845	-	2	423	0	0	3.61472	0	0	0.018544
MSTRG.1597.10	MSTRG.1597	chr1:104083983-104097734	+	8	828	0.249014	0.806834	1.05392	1.0798	2.01754	0.830633
MSTRG.1597.11	MSTRG.1597	chr1:104083983-104097734	+	8	870	0.497303	1.16157	1.02855	1.40454	1.59771	0.722113
MSTRG.1597.12	MSTRG.1597	chr1:104083983-104097734	+	8	3027	0	1.07188	0.762837	0.075981	0	0.650077
MSTRG.1597.13	MSTRG.1597	chr1:104083983-104097800	+	8	930	1.6124	0.350618	1.02239	1.01004	0.479835	2.16953
MSTRG.1592.1	MSTRG.1592	chr1:106432775-106433138	-	1	364	0.520461	0.316192	0.592081	1.24944	0.380712	1.03539
MSTRG.1605.1	MSTRG.1605	chr1:108839394-108847275	-	1	7882	0.983819	0.811155	0.830321	0.571905	0.208248	1.12509
MSTRG.1611.6	MSTRG.1611	chr1:109192846-109203677	-	6	801	1.15525	1.30908	1.3452	3.3881	2.54601	6.07199
MSTRG.1612.1	MSTRG.1612	chr1:109233251-109234792	-	1	1542	2.50971	1.49567	1.63393	0.831846	0.883151	0.673058
MSTRG.1613.4	MSTRG.1613	chr1:109234963-109244425	+	7	3540	0	5.43802	0	0	0	0
MSTRG.1613.5	MSTRG.1613	chr1:109234963-109244425	+	7	3756	9.34216	18.2915	9.89369	7.42773	8.41083	8.43535
MSTRG.1613.6	MSTRG.1613	chr1:109234963-109244425	+	6	5355	2.71581	12.8208	2.49656	3.18668	1.56513	5.50561
MSTRG.1614.1	MSTRG.1614	chr1:109241355-109242827	-	2	1139	2.5746	2.18604	2.83501	3.16906	3.63394	3.59099
MSTRG.1617.11	MSTRG.1617	chr1:109466728-109506079	-	14	4880	1.13207	0.908434	1.05905	1.94844	0.525816	0.661074
MSTRG.1617.19	MSTRG.1617	chr1:109477280-109481126	-	3	966	2.08758	4.12921	2.56578	0.707531	1.8805	1.47906
MSTRG.1620.1	MSTRG.1620	chr1:109481016-109481258	+	1	243	0.43436	0.27065	0.015889	0.490535	1.06517	0.175209
MSTRG.1622.1	MSTRG.1622	chr1:109605925-109606510	-	1	586	16.312	16.1698	18.2559	42.4628	40.3642	39.3154
MSTRG.1632.1	MSTRG.1632	chr1:109756540-109781262	+	13	1734	14.3714	120.226	18.0531	60.313	8.05548	38.9729
MSTRG.1632.5	MSTRG.1632	chr1:109756604-109780742	+	11	1809	8.90129	0.497833	0.260232	4.73226	0	0.118244
MSTRG.1633.1	MSTRG.1633	chr1:109777852-109780739	-	5	1007	0.395254	1.3406	0.291401	0.487162	0.366202	0.144851
MSTRG.1634.1	MSTRG.1634	chr1:109785763-109787810	+	2	639	0.411899	0.268509	0.208577	0.377149	0.38768	1.10789
MSTRG.1640.1	MSTRG.1640	chr1:109792240-109818373	+	33	11287	0.071574	0.068242	1.25372	0.07944	0.517261	0.196405
MSTRG.1640.2	MSTRG.1640	chr1:109792332-109818373	+	34	10705	3.2106	0.149739	1.76722	0.152246	1.317	1.94281
MSTRG.1640.5	MSTRG.1640	chr1:109812349-109818372	+	13	3066	0.894876	0.577657	1.01548	1.13878	2.04737	1.12838
MSTRG.1643.2	MSTRG.1643	chr1:109852192-109940552	-	20	7004	3.13857	3.5538	4.20835	5.88887	7.42266	3.44401
MSTRG.1637.1	MSTRG.1637	chr1:109944650-109953686	+	3	204	0	0	1.43758	0.877635	0.940142	0.12806
MSTRG.1638.2	MSTRG.1638	chr1:110026516-110035426	+	11	2529	1.13267	1.03073	2.01691	0.789587	0.748557	1.31849
MSTRG.1646.1	MSTRG.1646	chr1:110091233-110140403	+	10	5673	0	0	0	0	20.5534	0
MSTRG.1646.2	MSTRG.1646	chr1:110091233-110186982	+	10	3563	17.4388	0	0	0	0	0
MSTRG.1646.27	MSTRG.1646	chr1:110171001-110174122	+	7	1372	0	0	0.398098	2.58546	7.63042	5.89074
MSTRG.1650.32	MSTRG.1650	chr1:110230467-110236365	+	8	1187	4.51537	1.79375	9.31514	2.71564	2.95726	4.66747
MSTRG.1655.4	MSTRG.1655	chr1:110292978-110306526	-	19	1986	0.009028	0.012362	1.88654	0.023985	1.08011	0.038587
MSTRG.1657.1	MSTRG.1657	chr1:110623319-110624577	+	1	1259	0.153484	0.261499	0.0927	0.355505	0.276803	1.15858
MSTRG.1658.1	MSTRG.1658	chr1:110625279-110627682	+	3	454	1.38142	0.163184	0.054466	0.554748	0.435453	1.7591
MSTRG.1659.1	MSTRG.1659	chr1:110752964-110753320	+	1	357	1.01736	1.59408	1.19165	3.0281	3.00169	3.80187
MSTRG.1666.2	MSTRG.1666	chr1:110856957-110879235	-	3	1746	0.101231	0.025533	0.071614	1.39715	1.15123	1.03914
MSTRG.1666.3	MSTRG.1666	chr1:110857426-110881793	-	3	1241	0.720937	0.922709	1.02762	1.88343	2.48996	1.95625
MSTRG.1677.1	MSTRG.1677	chr1:110902950-110911711	+	1	8762	2.29926	1.69643	2.23266	0.6676	0.305753	1.6026
MSTRG.1669.1	MSTRG.1669	chr1:111486095-111487971	-	1	1877	0.944332	0.999536	0.803742	2.23982	1.57037	2.60202
MSTRG.1670.3	MSTRG.1670	chr1:111489844-111506587	-	4	3321	6.09807	4.74557	4.70093	7.96687	8.07351	8.67762
MSTRG.1670.4	MSTRG.1670	chr1:111489844-111506587	-	4	3313	0	4.30277	3.21814	7.11954	6.27545	5.74342
MSTRG.1672.4	MSTRG.1672	chr1:111659957-111682712	-	10	1907	17.2914	16.4126	17.1205	12.6377	10.2236	11.4716
MSTRG.1672.3	MSTRG.1672	chr1:111659957-111682736	-	10	1947	5.16366	4.43898	4.77582	2.02506	2.61537	1.91933
MSTRG.1672.9	MSTRG.1672	chr1:111661487-111682712	-	10	1042	1.28854	1.30477	1.00297	0.028405	0.254677	0.236541
MSTRG.1673.8	MSTRG.1673	chr1:111690299-111726953	+	9	1455	1.71411	1.57963	2.01894	1.07746	1.11949	1.3278
MSTRG.1683.1	MSTRG.1683	chr1:111956836-111991998	-	20	4036	0.082321	3.35638	2.54098	2.00778	0.29665	0.147343
MSTRG.1683.12	MSTRG.1683	chr1:111986164-111991351	-	6	613	1.20574	0.046233	0	0	0.978359	0.893653
MSTRG.1687.1	MSTRG.1687	chr1:111991267-112003648	+	8	1164	0.683454	14.8077	0.23965	0.20255	0.023581	6.2101
MSTRG.1687.3	MSTRG.1687	chr1:111991558-112011273	+	8	1908	5.86778	0.152984	7.90307	4.92082	4.83508	9.21412
MSTRG.1688.1	MSTRG.1688	chr1:112002145-112003641	-	2	217	0.553752	1.36118	0.765096	0.30347	1.43531	1.10066
MSTRG.1691.1	MSTRG.1691	chr1:112084652-112109235	+	2	1236	2.53033	2.41419	2.40943	0.497186	0.123227	0.433712
MSTRG.1693.1	MSTRG.1693	chr1:112159481-112159696	-	1	216	1.25797	0	0.179565	0	0	0
MSTRG.1691.3	MSTRG.1691	chr1:112162399-112259313	+	9	5124	0.834055	1.08269	0.576987	0.561747	0.884737	0.868801
MSTRG.1691.5	MSTRG.1691	chr1:112162405-112259313	+	9	5114	0	1.70347	1.163	0.703208	1.38728	1.50501
MSTRG.1691.8	MSTRG.1691	chr1:112162664-112255735	+	8	1600	23.6232	8.63917	10.5116	10.3239	0	0
MSTRG.1691.9	MSTRG.1691	chr1:112162704-112259269	+	9	5188	0	0.714214	0	4.54765	0.036404	0.621584
MSTRG.1691.10	MSTRG.1691	chr1:112164501-112255318	+	9	1204	0.022029	0	0.008163	0	0	2.22297
MSTRG.1702.1	MSTRG.1702	chr1:113015846-113022272	+	2	5826	1.31924	1.31327	1.26788	0.801745	0.350654	2.42612
MSTRG.1703.1	MSTRG.1703	chr1:113022585-113026779	+	1	4195	0.565709	0.501779	0.629175	0.367505	0.232402	1.27547
MSTRG.1704.1	MSTRG.1704	chr1:113041754-113043298	+	1	1545	0.57865	0.706508	1.1623	0.67034	0.302138	1.66257
MSTRG.1712.1	MSTRG.1712	chr1:113379270-113380563	-	1	1294	1.55078	1.12175	0.886873	0.120866	0.373397	0.62854
MSTRG.1713.1	MSTRG.1713	chr1:113381733-113382034	-	1	302	1.25223	1.10937	0.914707	0.157252	0	0.568975
MSTRG.1714.1	MSTRG.1714	chr1:113385512-113386151	-	1	640	1.29202	0.574564	0.438483	0.21049	0.091363	0.165566
MSTRG.1715.1	MSTRG.1715	chr1:113387991-113388608	-	1	618	0.903593	0.405338	1.11322	0.204407	0.126469	0.229849
MSTRG.1716.1	MSTRG.1716	chr1:113390774-113391113	-	1	340	0.714808	0.810153	1.18826	0.278422	0	0.286945
MSTRG.1717.2	MSTRG.1717	chr1:113392698-113400607	+	2	896	1.49295	1.64285	0.96005	1.02304	1.02454	0.819273
MSTRG.1722.1	MSTRG.1722	chr1:113443164-113518052	+	2	4354	0	0	8.9947	0	0	0
MSTRG.1722.5	MSTRG.1722	chr1:113499142-113506694	+	4	801	1.64129	2.81282	0.977495	0.265264	0.265979	0.777337
MSTRG.1722.6	MSTRG.1722	chr1:113499142-113518052	+	4	6453	1.78435	2.12417	0.737056	1.93896	0.889144	1.81507
MSTRG.1726.1	MSTRG.1726	chr1:113581610-113586379	+	1	4770	1.03006	0.616844	1.01405	0.263336	0.067666	0.73127
MSTRG.1731.1	MSTRG.1731	chr1:114051999-114052607	-	1	609	8.11846	6.68511	5.92128	7.79713	8.81837	8.10622
MSTRG.1733.1	MSTRG.1733	chr1:114230536-114235497	+	1	4962	1.98011	1.80341	1.6161	2.70849	2.11083	3.26535
MSTRG.1743.4	MSTRG.1743	chr1:114239827-114301777	-	20	3715	3.59432	3.62508	3.65388	5.0012	3.58749	4.3198
MSTRG.1743.3	MSTRG.1743	chr1:114239827-114302098	-	20	3439	1.2586	1.04145	1.05223	1.05538	1.39747	0.867527
MSTRG.1743.16	MSTRG.1743	chr1:114287008-114301777	-	4	5469	1.72806	1.9244	1.18815	1.7972	1.72144	1.57306
MSTRG.1743.17	MSTRG.1743	chr1:114287014-114343873	-	2	4409	0	0	0.320646	0.68714	0.356077	1.68345
MSTRG.1750.2	MSTRG.1750	chr1:114448031-114456707	+	3	3505	3.85459	4.17624	2.97197	5.79845	5.98993	6.9839
MSTRG.1735.4	MSTRG.1735	chr1:114472250-114520426	+	17	8205	0.036438	0	0.049751	0.061477	2.6378	0.052751
MSTRG.1735.12	MSTRG.1735	chr1:114506062-114520426	+	7	5782	0	0	0	1.271	0	0.02411
MSTRG.1736.1	MSTRG.1736	chr1:115107448-115109086	-	1	1639	1.14234	0.91749	0.725462	0.834384	0.617901	0.46525
MSTRG.1742.5	MSTRG.1742	chr1:115125474-115147646	-	12	3629	1.17294	0	0	0	0	0
MSTRG.1753.1	MSTRG.1753	chr1:115260745-115267951	+	6	799	0.518351	1.13229	0.530462	0.93197	1.11078	0.685792
MSTRG.1752.12	MSTRG.1752	chr1:115263199-115301297	-	16	2290	0	2.5404	0	0	0	0.55362
MSTRG.1757.1	MSTRG.1757	chr1:115457899-115458125	-	1	227	1.5686	2.27265	1.89265	2.00699	2.94851	2.2507
MSTRG.1759.5	MSTRG.1759	chr1:116519235-116612533	+	10	4082	0	0	5.41702	0	3.42589	1.37569
MSTRG.1759.2	MSTRG.1759	chr1:116519235-116612675	+	12	4567	2.82122	2.57686	1.08021	2.63705	0.599114	1.31522
MSTRG.1759.3	MSTRG.1759	chr1:116519235-116612675	+	11	4391	0	3.01721	0.889551	0	0.606676	2.27389
MSTRG.1759.4	MSTRG.1759	chr1:116519235-116612675	+	11	4437	3.62609	0	0.831028	1.94998	0.520514	1.12491
MSTRG.1759.6	MSTRG.1759	chr1:116519235-116612675	+	13	4668	0.024968	3.16144	0.034652	0	0.116033	0
MSTRG.1767.2	MSTRG.1767	chr1:116935544-116943878	-	10	1445	0.21396	0.465921	0.032076	0.960505	1.37763	1.10451
MSTRG.1761.1	MSTRG.1761	chr1:117029628-117034471	-	1	4844	1.1204	1.0591	1.0745	0.657188	0.320527	1.51906
MSTRG.1763.1	MSTRG.1763	chr1:117038444-117038804	-	1	361	0.705713	1.20937	0.628602	0.300814	0.493478	0.91389
MSTRG.1764.1	MSTRG.1764	chr1:117039277-117040070	-	1	794	1.23481	0.662163	0.709527	0.658122	0.072661	0.557859
MSTRG.1772.2	MSTRG.1772	chr1:117117031-117210160	-	12	7356	0.981218	2.11232	0	2.29863	4.61998	0.00583
MSTRG.1774.1	MSTRG.1774	chr1:117452679-117533174	+	10	6062	7.53291	0	0.003706	10.7312	0.225626	9.46291
MSTRG.1776.2	MSTRG.1776	chr1:117602984-117644278	+	21	6967	0.801296	0.622801	0.684626	1.63581	1.61086	1.73916
MSTRG.1780.1	MSTRG.1780	chr1:118319575-118320358	-	1	784	7.14327	7.28484	6.35803	6.12895	6.23563	8.64704
MSTRG.1784.1	MSTRG.1784	chr1:118321146-118321460	-	1	315	1.00714	0.833512	0.161493	0.711027	0.497659	1.20352
MSTRG.1785.1	MSTRG.1785	chr1:118378454-118393096	-	1	14643	0.948027	0.835049	0.971996	1.10415	0.939038	1.21627
MSTRG.1787.4	MSTRG.1787	chr1:118472398-118509153	+	28	9935	5.57504	4.92884	4.83548	4.54722	3.93429	4.64958
MSTRG.1794.1	MSTRG.1794	chr1:119569504-119683294	-	7	2864	2.72296	0	2.06053	0	0	0
MSTRG.1798.2	MSTRG.1798	chr1:119683048-119726446	+	4	5848	2.71504	2.60012	2.61379	2.47315	1.46259	2.24417
MSTRG.1800.1	MSTRG.1800	chr1:119786608-119786997	+	1	390	0.608361	1.1621	1.45307	0.753347	0	0.955103
MSTRG.1801.1	MSTRG.1801	chr1:119789259-119798455	+	1	9197	1.60514	1.56757	1.44066	0.406981	0.190097	1.02638
MSTRG.1790.1	MSTRG.1790	chr1:120111264-120152378	-	2	3785	0.034846	0.02218	0.030603	0.597024	0.301708	1.10626
MSTRG.1804.1	MSTRG.1804	chr1:120161308-120190954	-	3	5956	1.92432	1.29245	1.77315	1.10905	3.91621	4.0021
MSTRG.1809.1	MSTRG.1809	chr1:120253925-120286828	-	12	2488	0.876605	1.27255	0.932277	0.882188	0.708909	0.649889
MSTRG.1807.1	MSTRG.1807	chr1:120454176-120466528	-	8	6768	13.9919	5.63635	17.7902	4.35442	0.006783	17.5412
MSTRG.1807.3	MSTRG.1807	chr1:120454680-120466528	-	10	5967	0	0	0	0	5.52289	0
MSTRG.1816.1	MSTRG.1816	chr1:121107083-121134581	+	6	5890	15.9437	16.3607	16.0285	16.6619	14.1507	17.0852
MSTRG.1817.2	MSTRG.1817	chr1:121138907-121143696	+	2	4490	1.52167	1.51595	1.00289	0.485224	0.280995	0.689245
MSTRG.1814.1	MSTRG.1814	chr1:121318298-121322027	+	1	3730	1.13473	0.952449	0.696412	0.420985	0.144326	0.419159
MSTRG.1819.1	MSTRG.1819	chr1:121484055-121485436	+	2	363	0	1.4489	0.984363	3.39364	3.52355	1.68341
MSTRG.1819.2	MSTRG.1819	chr1:121484309-121485431	+	2	442	1.36994	0.392249	0.488744	1.0942	0.966309	2.36422
MSTRG.1820.1	MSTRG.1820	chr1:121484856-121485413	-	1	558	0.891139	1.49791	1.1285	0.620151	0.700864	1.42337
MSTRG.1829.1	MSTRG.1829	chr1:142684846-142685838	+	1	993	0.980445	0.986543	1.34844	0.167228	0.270427	1.12538
MSTRG.1831.1	MSTRG.1831	chr1:142693607-142694178	+	1	572	1.00546	0.66964	1.40293	0.35207	0.290998	1.23686
MSTRG.1838.1	MSTRG.1838	chr1:142847678-142849301	-	2	232	0	1.00609	1.36759	0	0.21507	0.875473
MSTRG.1841.3	MSTRG.1841	chr1:143119061-143189695	+	5	1167	1.08428	2.11902	1.01456	0.757983	0.311911	0.528706
MSTRG.1841.2	MSTRG.1841	chr1:143119061-143190977	+	4	2036	2.99028	1.15106	1.60276	0.95055	1.72146	1.97717
MSTRG.1844.1	MSTRG.1844	chr1:143210159-143211290	+	1	1132	1.12559	1.17121	0.984491	0.288912	0.204205	0.825083
MSTRG.1821.1	MSTRG.1821	chr1:143255175-143257081	+	1	1907	1.64177	1.32399	1.18835	0.290521	0.304882	0.503971
MSTRG.1859.1	MSTRG.1859	chr1:143385350-143386922	-	1	1573	1.09147	0.845549	0.772139	0.290455	0.089462	0.538176
MSTRG.1860.1	MSTRG.1860	chr1:143395287-143395667	-	1	381	1.48082	1.53191	0.913444	0.931935	0.148355	1.10094
MSTRG.1857.5	MSTRG.1857	chr1:143397437-143467613	-	5	3739	3.44029	3.20088	1.64453	0.251777	0.528184	0.337225
MSTRG.1857.6	MSTRG.1857	chr1:143397437-143467613	-	5	2260	0.457021	1.45576	0.959932	0.25836	0	0
MSTRG.1857.8	MSTRG.1857	chr1:143397585-143467613	-	6	8411	3.7136	2.89193	4.26214	1.35278	0.583767	2.86102
MSTRG.1857.10	MSTRG.1857	chr1:143425857-143467613	-	3	326	1.52042	1.30766	1.91812	3.11928	1.22557	2.2675
MSTRG.1857.12	MSTRG.1857	chr1:143440996-143467613	-	4	2470	2.26822	2.20624	2.11414	1.64863	1.60826	1.95076
MSTRG.1849.1	MSTRG.1849	chr1:143686406-143686679	-	1	274	1.70286	1.11366	1.44534	0.236584	0.278846	0.862984
MSTRG.1850.1	MSTRG.1850	chr1:143687039-143688550	-	1	1512	1.1435	0.800531	1.16727	0.148878	0.044516	0.365072
MSTRG.1853.1	MSTRG.1853	chr1:143690696-143694062	-	1	3367	1.01346	0.652324	1.14934	0.19366	0.088742	0.546973
MSTRG.1854.1	MSTRG.1854	chr1:143716969-143721171	-	3	1640	2.02527	1.76873	1.52408	1.76344	1.17729	1.63965
MSTRG.1854.2	MSTRG.1854	chr1:143716969-143721171	-	4	2358	1.51946	1.87861	1.96002	0.436665	1.13152	1.44738
MSTRG.1846.3	MSTRG.1846	chr1:143739618-143744956	-	3	1351	1.55963	1.0278	1.21951	0.849177	1.17735	1.08034
MSTRG.1855.1	MSTRG.1855	chr1:143743338-143744919	+	1	1582	1.21576	1.22306	1.02358	0.669297	0.380041	0.821438
MSTRG.1863.3	MSTRG.1863	chr1:143896450-143913143	-	3	2270	0.932215	1.09709	1.84243	0.441559	1.53361	1.17722
MSTRG.1868.10	MSTRG.1868	chr1:144151520-144178807	+	19	2156	3.02683	0.791576	0	0.33682	1.3755	1.76295
MSTRG.1868.6	MSTRG.1868	chr1:144151520-144178807	+	24	2888	3.73278	0.630872	5.41493	0.330266	1.64942	4.78505
MSTRG.1868.5	MSTRG.1868	chr1:144151520-144185925	+	31	3724	0	0	0	3.43827	0.036105	0
MSTRG.1868.7	MSTRG.1868	chr1:144151520-144185925	+	25	2992	0	0	0	1.85584	0	0
MSTRG.1868.8	MSTRG.1868	chr1:144151520-144185925	+	20	2260	0	0	0	1.24911	0	0
MSTRG.1868.11	MSTRG.1868	chr1:144151520-144188374	+	18	2133	0	1.9903	0	0	0	0
MSTRG.1868.12	MSTRG.1868	chr1:144151520-144188374	+	18	2133	0	1.77581	0	0	0	0
MSTRG.1868.13	MSTRG.1868	chr1:144151520-144188374	+	28	3372	0	2.41478	0	0	0	0
MSTRG.1868.9	MSTRG.1868	chr1:144151520-144188374	+	13	1401	0	1.93984	0	0	0	0
MSTRG.1870.1	MSTRG.1870	chr1:144295297-144295510	+	1	214	0.500314	0.343483	1.25394	0.217478	0	0.454556
MSTRG.1876.13	MSTRG.1876	chr1:144480753-144521970	-	4	883	0.321882	0.02844	0.018981	1.18465	0.063005	0.717972
MSTRG.1878.5	MSTRG.1878	chr1:144593736-144620039	+	10	1645	0.999031	0.339193	1.10383	1.61896	0.372677	0.967361
MSTRG.1878.6	MSTRG.1878	chr1:144593736-144620039	+	9	1571	1.21855	1.0672	0	0	0.342253	0
MSTRG.1878.4	MSTRG.1878	chr1:144593736-144621655	+	11	2025	0.535464	0.769118	0	0.135653	3.088	0.325904
MSTRG.1878.11	MSTRG.1878	chr1:144593808-144620039	+	11	3172	2.23017	2.5858	2.17582	1.39431	0.788419	1.66117
MSTRG.1878.9	MSTRG.1878	chr1:144593808-144620039	+	10	3661	0.608499	1.10518	2.18453	0.854703	0.458403	1.76789
MSTRG.1878.10	MSTRG.1878	chr1:144593808-144621655	+	10	1934	0.705502	1.88955	0.692491	0.9486	0.717874	1.81832
MSTRG.1878.16	MSTRG.1878	chr1:144594065-144621656	+	10	3600	1.33778	0.801784	1.45495	0.817179	0.538613	2.03661
MSTRG.1878.19	MSTRG.1878	chr1:144598651-144620039	+	8	1738	1.13911	0.92767	0.362254	0.084292	0.255707	0.85751
MSTRG.1878.20	MSTRG.1878	chr1:144598651-144620039	+	8	1183	0.698851	0.620135	1.28875	0.448153	0.337252	0.305136
MSTRG.1878.22	MSTRG.1878	chr1:144598655-144620039	+	9	1407	2.54852	0.473233	1.13958	2.00602	0.943475	1.54851
MSTRG.1888.1	MSTRG.1888	chr1:144697125-144977366	+	4	2169	1.92305	1.37653	1.72197	0.471643	0.206696	1.03114
MSTRG.1888.2	MSTRG.1888	chr1:144702836-144978939	+	2	781	2.01326	1.15685	2.26959	0.587148	0.314129	1.01231
MSTRG.1889.9	MSTRG.1889	chr1:144814560-144830301	+	13	3264	0.574373	1.88344	7.87464	0.581675	0.595331	7.06509
MSTRG.1891.23	MSTRG.1891	chr1:144890592-144932148	-	16	5458	1.89705	1.30622	2.23684	3.63261	1.93283	7.36104
MSTRG.1891.29	MSTRG.1891	chr1:144890595-144932148	-	18	5739	0.209883	0.206139	0	1.16435	0.376618	1.73478
MSTRG.1897.1	MSTRG.1897	chr1:145001877-145018948	+	4	4609	2.11979	0.890611	2.66722	0.859723	0.02833	0.448286
MSTRG.1897.4	MSTRG.1897	chr1:145013090-145018952	+	2	1711	0.662971	1.19288	0.431987	0.383284	0.48255	0
MSTRG.1882.2	MSTRG.1882	chr1:145096377-145119503	+	6	4290	19.5241	0.544378	19.396	1.35422	0.689871	24.01
MSTRG.1882.1	MSTRG.1882	chr1:145096377-145119507	+	7	4404	0.683252	5.85959	0.761682	0.039523	2.31087	0.819163
MSTRG.1882.3	MSTRG.1882	chr1:145096386-145119504	+	8	4379	0	0	0	11.8208	0	0
MSTRG.1882.4	MSTRG.1882	chr1:145096403-145119507	+	6	4272	1.22433	1.84882	1.47698	2.48726	8.53742	0.772204
MSTRG.1882.5	MSTRG.1882	chr1:145096403-145119507	+	7	4382	7.86695	16.008	8.38941	10.7339	20.1709	8.14588
MSTRG.1883.1	MSTRG.1883	chr1:145096419-145103961	-	2	257	0.093373	0.653315	0	1.57561	0	0
MSTRG.1880.1	MSTRG.1880	chr1:145120011-145121552	+	1	1542	1.04517	0.972885	1.01836	0.458732	0.400243	1.29021
MSTRG.1881.1	MSTRG.1881	chr1:145135158-145139569	-	2	4364	0	0	5.56698	11.3509	0	6.22588
MSTRG.1881.2	MSTRG.1881	chr1:145135158-145139569	-	2	4367	7.74778	0.110515	2.09116	0	8.63024	4.66678
MSTRG.1881.3	MSTRG.1881	chr1:145138424-145139569	-	2	987	0	0	0	0	1.59566	0
MSTRG.1881.4	MSTRG.1881	chr1:145138424-145139569	-	2	996	0	0	0	0	1.58152	0
MSTRG.1885.3	MSTRG.1885	chr1:145209119-145303994	+	14	13714	4.07021	2.38494	2.34867	0.471344	0.001441	0
MSTRG.1885.2	MSTRG.1885	chr1:145209119-145304026	+	14	13768	0.297856	1.87271	2.10454	0.552488	0.245161	4.83392
MSTRG.1885.11	MSTRG.1885	chr1:145318269-145342297	+	4	1593	4.70625	5.35398	5.80488	3.52794	2.37643	4.50528
MSTRG.1885.12	MSTRG.1885	chr1:145355940-145357011	+	1	1072	1.78028	1.13398	1.46883	0.271958	0.243421	0.831026
MSTRG.1886.1	MSTRG.1886	chr1:145359013-145366376	+	2	373	2.16536	0.001659	0	0	0	0.032013
MSTRG.1887.1	MSTRG.1887	chr1:145362093-145370207	+	4	2053	11.3207	7.94793	8.17075	7.53132	5.87186	7.37218
MSTRG.1887.2	MSTRG.1887	chr1:145362093-145370207	+	3	2053	16.2402	16.113	17.9139	14.99	12.7037	14.4919
MSTRG.1887.3	MSTRG.1887	chr1:145363998-145365466	+	2	857	2.95364	2.84783	2.92655	2.16668	1.37569	2.35278
MSTRG.1887.4	MSTRG.1887	chr1:145364299-145370207	+	2	2143	8.22763	8.22479	10.3247	6.9378	6.21484	8.76996
MSTRG.1899.3	MSTRG.1899	chr1:145456514-145476857	-	9	1058	7.93013	0.940696	0.779555	0.483814	0.039372	0.885739
MSTRG.1902.1	MSTRG.1902	chr1:145477085-145501670	+	6	3980	13.0948	4.73245	11.7431	13.1564	10.0472	7.90003
MSTRG.1902.2	MSTRG.1902	chr1:145477085-145501670	+	5	3884	2.60139	3.32838	2.53913	4.67656	5.12842	5.14988
MSTRG.1903.2	MSTRG.1903	chr1:145507557-145515785	+	7	657	0.350668	1.23266	0.261624	3.07958	0.187472	2.88522
MSTRG.1903.7	MSTRG.1903	chr1:145507633-145513533	+	7	4746	8.92919	0	0	0	0	0
MSTRG.1903.8	MSTRG.1903	chr1:145507633-145513533	+	7	3750	4.80909	0	0	0	0	0
MSTRG.1903.6	MSTRG.1903	chr1:145507633-145513536	+	7	3631	0	0	17.5551	0	0	0
MSTRG.1903.9	MSTRG.1903	chr1:145507633-145515978	+	7	792	1.20434	1.73188	0.806072	2.03962	3.81912	1.35531
MSTRG.1905.1	MSTRG.1905	chr1:145575233-145586546	+	14	2959	1.39893	0.553212	1.8249	2.16975	1.29284	1.26683
MSTRG.1906.2	MSTRG.1906	chr1:145586124-145610884	-	21	6826	0.025542	1.00408	1.06125	1.81332	1.25358	0.84282
MSTRG.1906.3	MSTRG.1906	chr1:145586253-145598573	-	13	1829	1.495	0	0	1.24252	0	1.08825
MSTRG.1906.8	MSTRG.1906	chr1:145589828-145611025	-	17	4617	7.66943	4.89025	5.09929	2.92228	4.71546	5.87537
MSTRG.1907.1	MSTRG.1907	chr1:145611036-145700464	+	10	8334	0.010306	3.57899	0.022719	0.006963	0	0.013101
MSTRG.1910.1	MSTRG.1910	chr1:145746379-145746639	-	1	261	0.392652	1.09243	0.467687	0.072175	0.070943	0.760764
MSTRG.1915.3	MSTRG.1915	chr1:146032648-146054494	-	17	3881	0.028787	1.6823	0.927259	2.10331	3.0125	0.435898
MSTRG.1915.4	MSTRG.1915	chr1:146032648-146240537	-	27	4716	1.1829	0.801322	5.82208	0.261449	0.168685	0.850429
MSTRG.1915.2	MSTRG.1915	chr1:146032648-146253168	-	39	6647	1.65777	4.12672	2.45937	1.24727	1.6113	1.5777
MSTRG.1918.1	MSTRG.1918	chr1:146077445-146077701	+	1	257	0.16545	0.64353	0.402223	0.548507	0.43456	1.16336
MSTRG.1915.19	MSTRG.1915	chr1:146214925-146234910	-	23	3403	7.47322	0.041249	0.038974	5.72011	4.02033	6.5775
MSTRG.1915.22	MSTRG.1915	chr1:146244515-146253102	-	9	1428	1.37614	0.210809	0.144292	1.93959	0.494622	1.25915
MSTRG.1921.5	MSTRG.1921	chr1:146420024-146467712	+	13	3237	2.42681	1.81961	1.75615	1.81456	1.29081	1.12259
MSTRG.1914.1	MSTRG.1914	chr1:146471411-146471964	-	1	554	1.16865	0.630353	0.402432	0.643344	0.701702	0.334229
MSTRG.1925.13	MSTRG.1925	chr1:146714396-146767443	+	23	2898	0	14.1613	0	9.45712	0	4.3837
MSTRG.1923.2	MSTRG.1923	chr1:147071988-147097972	+	10	6112	2.96994	2.61086	1.1115	5.33723	2.43276	2.9757
MSTRG.1923.3	MSTRG.1923	chr1:147071988-147097972	+	10	6109	0	0	0	0	0	2.16656
MSTRG.2013.1	MSTRG.2013	chr1:147574324-148347051	-	113	15686	2.63467	2.5172	4.13447	4.11886	3.23961	2.91566
MSTRG.2016.1	MSTRG.2016	chr1:147619281-147619537	+	1	257	0.16545	0.64353	0.402223	0.548507	0.43456	1.16336
MSTRG.2025.1	MSTRG.2025	chr1:147751372-147764015	+	2	4498	1.22524	1.74186	1.23703	0.956805	0.90915	0.959961
MSTRG.2038.1	MSTRG.2038	chr1:147873915-147874188	-	1	274	1.70286	1.11366	1.44534	0.236584	0.278846	0.862984
MSTRG.2041.1	MSTRG.2041	chr1:147903471-147933058	-	3	2719	1.42553	0.846075	0.959751	0.521861	0.77971	0.867597
MSTRG.2041.2	MSTRG.2041	chr1:147904478-147933058	-	3	2626	1.29811	1.45217	1.47647	1.18518	0.734779	1.81341
MSTRG.2013.12	MSTRG.2013	chr1:148003660-148272792	-	4	1419	1.86591	0.033871	0.056913	0	0	0.030977
MSTRG.2013.15	MSTRG.2013	chr1:148005466-148025848	-	18	2026	0	5.48281	10.7697	5.43889	4.62186	4.33339
MSTRG.2013.16	MSTRG.2013	chr1:148005466-148025848	-	16	1744	0	0	0	0	0	4.73497
MSTRG.2013.17	MSTRG.2013	chr1:148005466-148025848	-	13	1519	8.00909	6.40388	4.77756	4.82355	3.97387	4.69924
MSTRG.2013.18	MSTRG.2013	chr1:148005466-148025863	-	20	2266	11.3265	4.13374	1.11863	3.19439	1.99624	2.29053
MSTRG.2013.14	MSTRG.2013	chr1:148005466-148346929	-	21	2598	3.17599	2.86695	6.0602	2.45057	1.60129	4.55014
MSTRG.2048.1	MSTRG.2048	chr1:148193220-148194642	+	2	1364	1.4939	2.29823	0.013253	5.06186	5.80428	4.51986
MSTRG.2053.1	MSTRG.2053	chr1:148349100-148351259	-	1	2160	1.57715	1.13973	1.4279	0.377258	0.28609	1.2049
MSTRG.2055.1	MSTRG.2055	chr1:148353248-148354048	-	1	801	2.27793	1.36294	1.67078	1.71596	1.54693	2.33159
MSTRG.2056.1	MSTRG.2056	chr1:148354665-148361358	-	1	6694	2.77275	2.52763	2.80007	1.47832	1.42552	2.10633
MSTRG.1943.5	MSTRG.1943	chr1:148556095-148560628	+	5	730	2.94139	0.195963	1.95737	0.203246	1.23037	3.24297
MSTRG.1943.7	MSTRG.1943	chr1:148556095-148568877	+	5	826	1.07527	0.805594	0.799463	1.82442	0.938851	0.321209
MSTRG.1943.6	MSTRG.1943	chr1:148556095-148596263	+	20	4533	5.08323	1.99718	0.608648	3.62339	1.13793	1.27984
MSTRG.1943.8	MSTRG.1943	chr1:148556095-148596267	+	22	4687	0.614944	1.92566	3.79225	1.26965	0.990585	1.14445
MSTRG.1943.15	MSTRG.1943	chr1:148560891-148568877	+	3	1745	2.20496	2.29412	2.17598	1.00225	1.05396	1.43681
MSTRG.1943.12	MSTRG.1943	chr1:148560891-148596263	+	19	4292	6.36271	4.72756	6.71406	1.54141	2.13602	1.98606
MSTRG.1943.14	MSTRG.1943	chr1:148560891-148596263	+	18	4189	1.59441	0	0	0.730369	0	3.15275
MSTRG.1943.13	MSTRG.1943	chr1:148560891-148758311	+	18	4111	0	0	1.6301	0.020813	0	0
MSTRG.1943.17	MSTRG.1943	chr1:148736792-148758311	+	16	3812	1.25999	0.047969	0.377704	0	0.210292	0.072649
MSTRG.1941.1	MSTRG.1941	chr1:148859001-148859503	-	1	503	4.90147	3.88947	5.71843	6.52926	3.39968	6.4128
MSTRG.1953.1	MSTRG.1953	chr1:148943351-148943965	+	1	615	0.678433	0.735683	1.12379	0.354953	0.337206	0.904321
MSTRG.1954.1	MSTRG.1954	chr1:148945685-148946097	+	1	413	1.60636	1.33648	0.920859	0.537569	0.42167	0.907229
MSTRG.1955.1	MSTRG.1955	chr1:148946463-148946999	+	1	537	1.48003	1.0313	0.848427	0.695695	0.136834	1.27175
MSTRG.1950.1	MSTRG.1950	chr1:148952722-148953712	+	1	991	0.911327	1.12616	0.546078	0.483127	0.249781	0.871867
MSTRG.1962.1	MSTRG.1962	chr1:149264849-149265453	+	1	605	0.822208	1.14974	0.746274	0.012995	0	0.373009
MSTRG.1963.1	MSTRG.1963	chr1:149271316-149271740	+	1	425	1.11362	0.199656	0.655968	0.314924	0.068791	0.395771
MSTRG.1964.1	MSTRG.1964	chr1:149276790-149664204	+	2	1845	1.36692	1.26058	0.849675	0.294164	0.318824	0.436138
MSTRG.1966.1	MSTRG.1966	chr1:149284645-149677245	+	3	754	1.45432	1.91552	1.63626	0.942256	1.41839	1.49001
MSTRG.1974.1	MSTRG.1974	chr1:149397008-149397277	-	1	270	0.451568	0.448961	0.513292	0.306047	0.110448	1.12391
MSTRG.1982.1	MSTRG.1982	chr1:149576286-149616669	+	2	1320	0.40579	1.54812	3.46526	0.323638	0.245912	1.1404
MSTRG.1982.2	MSTRG.1982	chr1:149576286-149670271	+	3	533	0.003724	0.024129	1.93586	1.59308	0	0.33329
MSTRG.1982.3	MSTRG.1982	chr1:149576352-149664889	+	2	771	0.653032	0.057685	0.899233	1.1942	0.996381	1.04122
MSTRG.1982.4	MSTRG.1982	chr1:149576421-149670302	+	2	374	0	4.04937	0.971821	0	0	0
MSTRG.1982.5	MSTRG.1982	chr1:149576469-149616659	+	3	1182	2.15395	0.292221	0	0	2.39855	1.32281
MSTRG.1991.1	MSTRG.1991	chr1:149672164-149672595	+	1	432	0.960813	1.55077	0.543416	0.324295	0.449595	0.275188
MSTRG.1959.1	MSTRG.1959	chr1:149778115-149779041	-	1	927	1.19876	1.09342	1.51118	0.999622	0.451623	3.49098
MSTRG.1996.4	MSTRG.1996	chr1:149804234-149818053	+	2	8084	0.172133	3.2943	0.038371	2.56312	2.31254	1.2741
MSTRG.1996.8	MSTRG.1996	chr1:149810339-149818053	+	2	7323	3.27856	1.55987	0	0	0	1.30625
MSTRG.1999.1	MSTRG.1999	chr1:149816065-149832714	-	3	11869	1.8351	1.76507	2.16733	0.592342	0.858034	1.60638
MSTRG.2006.2	MSTRG.2006	chr1:149898274-149899718	-	4	654	3.00492	1.59735	0	2.8196	1.80233	2.11283
MSTRG.2007.3	MSTRG.2007	chr1:149900544-149908293	-	16	2759	2.151	0	0	0.346149	0	0.628252
MSTRG.2008.1	MSTRG.2008	chr1:149909154-149982700	-	12	9504	6.63519	6.25813	6.87232	9.29568	3.03325	9.3767
MSTRG.2008.3	MSTRG.2008	chr1:149909718-149982694	-	13	8928	0	0	0	0	5.18421	0
MSTRG.2009.1	MSTRG.2009	chr1:150017965-150019876	-	1	1912	1.37226	0.971426	1.35547	0.573424	0.384718	0.46103
MSTRG.2012.1	MSTRG.2012	chr1:150039364-150039757	-	1	394	2.59833	1.3349	1.57017	1.24993	0.729172	0.973996
MSTRG.2058.9	MSTRG.2058	chr1:150192840-150208303	-	7	1126	22.2314	34.9786	19.8139	34.6923	34.3553	34.113
MSTRG.2059.1	MSTRG.2059	chr1:150192975-150201561	+	4	489	1.18882	0.427219	1.37962	1.92162	1.22365	1.27243
MSTRG.2060.7	MSTRG.2060	chr1:150239497-150241399	-	5	640	8.88562	7.68854	9.09655	9.65418	9.08917	9.50957
MSTRG.2064.1	MSTRG.2064	chr1:150266278-150280826	-	3	501	0.48726	1.46756	0.772073	0.689127	0.655527	0.409664
MSTRG.2062.1	MSTRG.2062	chr1:150281739-150282210	+	1	472	2.49539	1.48214	2.21498	1.25131	0.839094	1.14149
MSTRG.2065.1	MSTRG.2065	chr1:150334486-150334710	+	1	225	0.198068	1.22165	0.232444	0.196292	0	0.319901
MSTRG.2067.3	MSTRG.2067	chr1:150337184-150449042	+	10	6444	0	2.56519	2.82771	2.95758	3.21291	3.26513
MSTRG.2067.5	MSTRG.2067	chr1:150337187-150449042	+	11	6642	1.82527	1.90348	0.767859	1.83267	1.14787	0.601716
MSTRG.2067.6	MSTRG.2067	chr1:150337187-150449042	+	11	7404	1.01721	0.949506	0.603802	0.686887	0.470129	0.67685
MSTRG.2068.7	MSTRG.2068	chr1:150459918-150470063	+	7	927	1.41421	1.6438	2.93243	1.49737	1.29109	2.07596
MSTRG.2069.1	MSTRG.2069	chr1:150508333-150508567	-	1	235	0.993498	1.20094	0.197161	0	0	0
MSTRG.2072.4	MSTRG.2072	chr1:150521897-150533413	+	19	4419	4.1729	3.75556	3.45471	3.29284	2.90803	3.6864
MSTRG.2077.1	MSTRG.2077	chr1:150551712-150552062	+	1	351	1.31953	1.62353	1.16102	1.1505	0.626925	0.67938
MSTRG.2078.1	MSTRG.2078	chr1:150558156-150602072	-	6	20469	5.63385	4.99331	5.66043	1.5458	1.76997	3.88216
MSTRG.2078.2	MSTRG.2078	chr1:150572087-150585521	-	2	5095	0.695959	0.4328	0.507051	0.151251	0.15866	1.24009
MSTRG.2078.7	MSTRG.2078	chr1:150594514-150602053	-	5	1225	0	0	0	3.55413	1.67722	0
MSTRG.2079.1	MSTRG.2079	chr1:150594602-150595021	+	1	420	0.414122	0.778347	0.836146	0.111941	1.11886	0.874607
MSTRG.2080.1	MSTRG.2080	chr1:150595291-150602075	+	4	524	1.35647	1.0351	1.36852	1.18899	1.46701	1.29273
MSTRG.2081.1	MSTRG.2081	chr1:150603476-150608256	+	1	4781	2.04099	1.28599	1.30719	0.356101	0.149208	0.810046
MSTRG.2084.1	MSTRG.2084	chr1:150618701-150692273	-	18	6105	9.6676	8.31084	9.39177	7.10298	6.47539	7.32193
MSTRG.2085.1	MSTRG.2085	chr1:150646294-150738433	-	9	3022	0	0.00471	5.11585	0	0	0
MSTRG.2087.3	MSTRG.2087	chr1:150782570-150849085	-	21	4225	7.83576	0	14.0466	12.1029	11.2601	0
MSTRG.2089.6	MSTRG.2089	chr1:150898825-150933366	+	16	2957	6.21842	6.3786	2.65886	2.95626	3.695	3.24161
MSTRG.2089.15	MSTRG.2089	chr1:150900318-150933366	+	15	2562	0	1.18484	0.172631	0.118653	0.150012	0.785316
MSTRG.2090.3	MSTRG.2090	chr1:150937649-150947302	-	12	2264	0	0	1.24233	0	0	0
MSTRG.2090.8	MSTRG.2090	chr1:150937650-150946953	-	12	2190	6.38918	11.1043	2.71319	5.60736	3.85452	6.71427
MSTRG.2092.1	MSTRG.2092	chr1:150941457-150947225	+	2	242	0.584522	0.617075	0.508378	0.153067	1.12354	0.299007
MSTRG.2095.1	MSTRG.2095	chr1:150965688-150979333	-	11	4736	2.8326	2.02031	2.07805	2.07856	1.79584	2.17911
MSTRG.2096.12	MSTRG.2096	chr1:150981006-151008187	+	9	2491	0	0	3.3487	3.78942	2.90005	1.56332
MSTRG.2101.1	MSTRG.2101	chr1:151029204-151040973	+	3	2413	0	0	0	0	2.62039	0
MSTRG.2102.2	MSTRG.2102	chr1:151043080-151098017	+	9	7930	0	0	1.62384	0	0	0
MSTRG.2104.6	MSTRG.2104	chr1:151138555-151141609	+	7	859	4.27908	3.69921	0	0	0	1.59175
MSTRG.2109.1	MSTRG.2109	chr1:151236419-151237674	-	3	206	0.912643	1.40382	0.664526	1.1496	0.672715	0.58945
MSTRG.2110.1	MSTRG.2110	chr1:151238505-151239882	-	4	518	0.984683	1.11431	1.63746	0.582981	0.71717	0.337247
MSTRG.2112.5	MSTRG.2112	chr1:151255012-151264379	+	10	5341	0	0	0.04864	2.74438	0.005866	0.00168
MSTRG.2113.7	MSTRG.2113	chr1:151265099-151299853	-	12	2972	7.72325	7.55469	5.99603	5.43746	7.20767	5.74444
MSTRG.2113.8	MSTRG.2113	chr1:151265099-151299853	-	12	2943	1.60251	2.77365	0.909869	8.59867	6.70306	4.66482
MSTRG.2116.7	MSTRG.2116	chr1:151316225-151319704	-	9	966	1.48107	2.06318	2.01678	2.73743	2.18164	2.38087
MSTRG.2125.5	MSTRG.2125	chr1:151512810-151556059	+	11	2905	12.2683	6.75595	13.0707	14.2258	14.9093	13.9744
MSTRG.2130.4	MSTRG.2130	chr1:151609089-151641837	+	7	3334	0.137988	0.216868	0.222558	0.622552	0.296923	1.77234
MSTRG.2136.3	MSTRG.2136	chr1:151732130-151735960	-	6	1544	5.17174	0.547137	4.24916	5.99053	2.94946	2.59023
MSTRG.2136.14	MSTRG.2136	chr1:151740967-151762998	-	15	3938	1.93548	0.571469	0.73581	0.65824	0.595597	0.988985
MSTRG.2136.22	MSTRG.2136	chr1:151745974-151762959	-	14	2586	1.03148	0.987527	1.69205	1.24247	1.0469	1.52397
MSTRG.2132.1	MSTRG.2132	chr1:151843328-151881978	-	7	4889	2.88662	2.40619	3.09911	3.00312	2.95621	3.0534
MSTRG.2133.1	MSTRG.2133	chr1:151879457-151880099	+	1	643	1.21107	1.70422	0.551892	6.70105	4.50803	4.85502
MSTRG.2140.1	MSTRG.2140	chr1:151955391-151966403	+	3	739	0.652612	0.998064	1.45057	2.23841	2.15453	1.81984
MSTRG.2143.1	MSTRG.2143	chr1:152004982-152009485	+	3	568	1.03904	1.58154	1.04962	2.07825	2.47478	2.33477
MSTRG.2145.2	MSTRG.2145	chr1:153422999-153508467	-	4	462	0	0	268.734	17.138	0	0
MSTRG.2145.1	MSTRG.2145	chr1:153422999-153508698	-	4	695	0	0	181.162	194.24	0	0
MSTRG.2146.1	MSTRG.2146	chr1:153422999-153508887	+	4	884	1.6418	2.77265	2.25017	2.46941	3.60314	2.31073
MSTRG.2152.1	MSTRG.2152	chr1:153515888-153530695	+	5	8576	2.45278	2.21199	2.29701	0.747578	0.447679	1.18291
MSTRG.2154.2	MSTRG.2154	chr1:153519989-153522096	-	3	734	0.241062	0.847299	0.934146	1.90712	4.02064	2.27648
MSTRG.2155.1	MSTRG.2155	chr1:153530746-153533608	+	1	2863	1.86597	1.99631	2.61372	0.746936	0.405269	1.22089
MSTRG.2150.1	MSTRG.2150	chr1:153574292-153578057	-	1	3766	2.16502	1.87061	2.33681	2.13491	1.77979	2.30395
MSTRG.2158.1	MSTRG.2158	chr1:153579369-153585631	+	3	1183	0.538839	0.706538	0.661066	0.970141	1.69041	0.58229
MSTRG.2157.3	MSTRG.2157	chr1:153579451-153585559	-	4	951	0	2.34938	0	28.1772	0	0
MSTRG.2159.4	MSTRG.2159	chr1:153586734-153589738	-	6	1235	0.75107	0.550467	0.671765	1.01868	2.8896	2.00724
MSTRG.2160.1	MSTRG.2160	chr1:153591263-153604673	-	6	964	0.406404	0.005026	1.12866	3.4136	2.37879	4.03649
MSTRG.2160.6	MSTRG.2160	chr1:153591280-153599524	-	3	804	13.8301	6.52575	6.68251	6.50956	6.60478	5.28102
MSTRG.2161.1	MSTRG.2161	chr1:153591280-153599970	+	3	461	0.475919	1.1904	0.922818	0.87934	1.23794	0.325521
MSTRG.2160.5	MSTRG.2160	chr1:153591280-153606525	-	6	965	21.8874	34.8003	0	21.6718	30.3914	16.6407
MSTRG.2163.5	MSTRG.2163	chr1:153606556-153618778	+	5	3705	3.6726	5.32784	6.42474	6.7708	2.93859	5.46274
MSTRG.2163.6	MSTRG.2163	chr1:153606556-153618778	+	5	3702	6.20492	8.0068	7.27773	8.60215	5.95246	5.37507
MSTRG.2163.7	MSTRG.2163	chr1:153606556-153618778	+	4	3564	3.67606	3.84484	3.88779	4.82446	2.96774	6.75288
MSTRG.2163.8	MSTRG.2163	chr1:153606556-153618778	+	5	3627	0	0	0	0	4.30893	0
MSTRG.2163.11	MSTRG.2163	chr1:153610818-153618778	+	4	1599	0	0	0	0	0	5.91187
MSTRG.2163.12	MSTRG.2163	chr1:153610818-153618778	+	3	2351	1.17677	0.383497	0.406932	0.315859	0	0.510525
MSTRG.2165.3	MSTRG.2165	chr1:153634541-153643458	-	14	1558	133.75	135.4	107.705	152.234	162.294	140.84
MSTRG.2165.4	MSTRG.2165	chr1:153634541-153643458	-	14	1616	0.9571	0.855832	37.9697	58.2838	61.2606	62.2299
MSTRG.2165.5	MSTRG.2165	chr1:153634541-153643458	-	14	1577	11.5869	4.2921	10.8948	7.00964	8.24055	6.27816
MSTRG.2166.2	MSTRG.2166	chr1:153634762-153635667	+	2	758	0	1.17141	0.773284	0.701059	0	0.575351
MSTRG.2167.1	MSTRG.2167	chr1:153650890-153666468	+	23	4092	0	2.71779	1.37052	0	0	0
MSTRG.2167.2	MSTRG.2167	chr1:153651113-153666444	+	21	4134	7.63188	4.40885	5.30561	3.36317	3.21188	3.26772
MSTRG.2168.1	MSTRG.2168	chr1:153700543-153746555	+	31	4596	10.8627	3.48256	3.46418	4.37706	0.408219	2.29835
MSTRG.2168.6	MSTRG.2168	chr1:153723611-153746555	+	22	3155	0.675185	0	0	1.17564	4.70226	3.73691
MSTRG.2171.2	MSTRG.2171	chr1:153777201-153790004	-	7	6465	1.25588	0	0	0	5.85977	0
MSTRG.2171.5	MSTRG.2171	chr1:153777213-153790004	-	6	6476	1.38125	3.17844	2.19898	8.84222	2.84654	10.2235
MSTRG.2171.6	MSTRG.2171	chr1:153777581-153790004	-	8	5975	0	0	4.26268	0	0	0
MSTRG.2176.5	MSTRG.2176	chr1:153904652-153913910	-	17	3160	1.61957	0	0	0	0	0
MSTRG.2176.13	MSTRG.2176	chr1:153914405-153919174	-	6	1420	1.62036	1.53873	1.97781	2.396	2.69993	1.89297
MSTRG.2179.10	MSTRG.2179	chr1:153924632-153931040	-	9	822	0.276637	0.620388	0.904588	3.52893	1.18123	0.128361
MSTRG.2179.9	MSTRG.2179	chr1:153924632-153935968	-	13	1570	0.594649	0.724155	0	0.698561	1.48499	0.647513
MSTRG.2179.20	MSTRG.2179	chr1:153931588-153936048	-	5	1601	0	0	0	0	8.42472	0
MSTRG.2180.1	MSTRG.2180	chr1:153932268-153932585	+	1	318	1.34185	0.740894	0.824533	0.644152	1.35393	0.84174
MSTRG.2181.1	MSTRG.2181	chr1:153936199-153936615	+	1	417	1.55504	3.37514	2.28154	0.96194	0	1.4761
MSTRG.2185.1	MSTRG.2185	chr1:153944058-153950164	-	6	1065	0	0	17.8815	0	0	0
MSTRG.2186.1	MSTRG.2186	chr1:153949895-153950163	+	1	269	0.747194	1.39576	0.452517	0.379567	0.535452	0.407389
MSTRG.2177.1	MSTRG.2177	chr1:153952789-153958828	-	9	1713	18.9988	0.100214	46.1694	31.1073	0.33123	0.131634
MSTRG.2178.1	MSTRG.2178	chr1:153954277-153958838	+	8	1036	3.13448	3.14687	3.21426	1.38606	2.24337	1.7688
MSTRG.2188.1	MSTRG.2188	chr1:153963235-153973368	+	5	510	259.033	385.965	400.447	334.501	390.472	316.33
MSTRG.2189.1	MSTRG.2189	chr1:153963246-153964622	-	4	335	5.32375	3.04837	4.37639	5.34396	6.72574	4.49382
MSTRG.2197.1	MSTRG.2197	chr1:154129770-154155690	+	8	1187	0.17653	0.996673	1.10077	1.18212	1.46793	0.994181
MSTRG.2201.1	MSTRG.2201	chr1:154186941-154193059	+	3	454	0.824239	1.77969	1.02866	0.271621	0.133257	0.443041
MSTRG.2202.8	MSTRG.2202	chr1:154193443-154215754	+	10	1288	4.16722	2.61468	2.22937	2.92861	2.59374	3.44484
MSTRG.2203.1	MSTRG.2203	chr1:154201186-154209509	-	5	337	1.30849	0.858411	1.0176	1.56045	0.824164	0.840011
MSTRG.2202.14	MSTRG.2202	chr1:154227723-154235798	+	8	2660	1.53396	2.98326	1.55586	0.776116	0.742839	2.29017
MSTRG.2202.17	MSTRG.2202	chr1:154229547-154235798	+	7	951	0	0	1.83875	0	2.43178	0
MSTRG.2202.18	MSTRG.2202	chr1:154229547-154235798	+	6	911	0.000255	0	0.000106	1.3486	0.866093	0
MSTRG.2206.5	MSTRG.2206	chr1:154301246-154323779	+	27	6033	0.590626	0.036146	0.557538	3.32446	2.90698	3.24124
MSTRG.2211.1	MSTRG.2211	chr1:154521053-154531384	-	14	2943	0	0	0	0	12.1387	0
MSTRG.2211.3	MSTRG.2211	chr1:154522483-154525552	-	9	1416	0.762743	0.557078	0.806947	4.87777	4.50639	4.35429
MSTRG.2211.5	MSTRG.2211	chr1:154523429-154531109	-	12	1521	0.191334	0.373192	0.16802	7.94471	7.75295	7.55084
MSTRG.2213.1	MSTRG.2213	chr1:154530952-154531181	+	1	230	0.514608	3.26233	2.31817	5.47581	5.15064	5.86049
MSTRG.2216.4	MSTRG.2216	chr1:154557285-154580682	-	16	4173	2.13371	3.38858	3.37349	1.95834	1.60517	2.0969
MSTRG.2216.5	MSTRG.2216	chr1:154557285-154600388	-	16	3585	15.5487	14.7983	10.691	11.4033	9.80777	10.492
MSTRG.2216.11	MSTRG.2216	chr1:154574572-154580682	-	3	610	1.54163	1.00086	0.902624	0.201601	0.293036	0.51433
MSTRG.2214.1	MSTRG.2214	chr1:154644089-154652309	+	2	2692	0.198456	0.20292	0.116372	1.41682	1.46499	1.28417
MSTRG.2219.1	MSTRG.2219	chr1:154918421-154918884	+	1	464	0.280361	0.994691	1.05604	2.28819	2.30109	1.80759
MSTRG.2221.1	MSTRG.2221	chr1:154933462-154934109	+	2	201	0.4955	1.00663	0.058926	0	1.29453	0.041296
MSTRG.2220.4	MSTRG.2220	chr1:154934774-154943217	-	13	2437	1.76464	1.20612	1.60764	7.95813	12.4803	8.45305
MSTRG.2220.5	MSTRG.2220	chr1:154934774-154943217	-	12	3036	1.66232	1.52885	0.141538	0.066714	0.057521	0.058776
MSTRG.2220.6	MSTRG.2220	chr1:154934774-154946812	-	13	6865	4.83479	3.83478	4.21207	4.31914	4.50338	5.91237
MSTRG.2225.11	MSTRG.2225	chr1:154961061-154965587	+	5	873	1.31364	1.62382	0.805221	3.74388	2.7717	2.46421
MSTRG.2225.12	MSTRG.2225	chr1:154961061-154965587	+	6	966	0	2.54204	3.67572	0.93074	1.78444	3.1171
MSTRG.2228.1	MSTRG.2228	chr1:154994540-154995005	-	1	466	0.232309	0	0	0.640334	0.193653	1.19552
MSTRG.2232.2	MSTRG.2232	chr1:155017667-155023643	-	5	1307	0.903398	2.13268	2.00875	1.69458	0.002104	1.99258
MSTRG.2232.1	MSTRG.2232	chr1:155017667-155023657	-	4	1527	2.32413	1.63091	1.62044	1.14768	2.7079	1.60678
MSTRG.2233.1	MSTRG.2233	chr1:155033266-155034977	-	3	210	0.721001	1.39366	0.875843	0.488318	0.967113	1.56648
MSTRG.2229.4	MSTRG.2229	chr1:155036237-155042014	+	5	1337	0.02625	0.50198	3.73693	4.34865	0.47236	0.743205
MSTRG.2235.3	MSTRG.2235	chr1:155107867-155111327	+	6	1430	6.45684	0	4.51028	0	3.9062	1.28563
MSTRG.2236.1	MSTRG.2236	chr1:155141884-155146315	-	6	698	0.491356	0	1.1405	0.869428	1.39633	0
MSTRG.2236.2	MSTRG.2236	chr1:155141884-155146315	-	6	627	0	0	1.3429	1.65613	1.20008	0
MSTRG.2236.24	MSTRG.2236	chr1:155158424-155162700	-	8	2206	0.844824	0.543228	0.676412	0.568902	0.778946	1.14224
MSTRG.2244.2	MSTRG.2244	chr1:155180632-155189197	-	10	5298	2.6928	0.364675	2.42945	1.52678	1.52607	1.82087
MSTRG.2239.1	MSTRG.2239	chr1:155204243-155214386	-	13	2451	1.44704	1.01363	0.717918	0.38994	0	0
MSTRG.2245.7	MSTRG.2245	chr1:155217218-155224699	-	9	2005	0	0	2.75046	0	0	0
MSTRG.2245.10	MSTRG.2245	chr1:155217865-155224699	-	8	1555	6.35185	6.44999	3.19416	11.7529	8.64084	14.8104
MSTRG.2245.12	MSTRG.2245	chr1:155220379-155224699	-	9	1308	0.098178	2.71995	0.005717	3.80682	0.594706	0.120213
MSTRG.2246.4	MSTRG.2246	chr1:155225798-155232130	-	8	1892	7.65921	6.18753	7.04749	7.65282	9.55563	6.57433
MSTRG.2247.10	MSTRG.2247	chr1:155232671-155243078	-	12	2273	5.0624	5.43288	4.6893	2.17461	2.1305	3.34388
MSTRG.2247.5	MSTRG.2247	chr1:155232671-155243078	-	14	2055	3.95609	5.61682	2.26049	2.89557	2.6345	3.27275
MSTRG.2247.6	MSTRG.2247	chr1:155232671-155243078	-	13	1970	1.94765	1.0671	1.7448	0.910809	1.66525	3.18671
MSTRG.2247.7	MSTRG.2247	chr1:155232671-155243078	-	13	1922	9.11026	9.47423	7.74789	4.59511	6.08085	3.72494
MSTRG.2247.8	MSTRG.2247	chr1:155232671-155243078	-	13	2406	2.09498	1.23293	1.59198	1.5726	1.41458	2.15121
MSTRG.2247.9	MSTRG.2247	chr1:155232671-155243078	-	12	1834	3.58988	1.3797	2.80433	0.876254	2.06727	3.31298
MSTRG.2248.1	MSTRG.2248	chr1:155247218-155259637	+	7	4275	0.352785	0.070064	1.81916	1.42326	1.76972	0.551214
MSTRG.2250.1	MSTRG.2250	chr1:155277621-155278373	-	1	753	0.185698	0.111232	0.208832	0.607553	1.09619	0.645536
MSTRG.2251.17	MSTRG.2251	chr1:155278776-155290456	+	10	1169	10.5362	5.46388	9.43312	3.86692	3.76422	3.3824
MSTRG.2263.5	MSTRG.2263	chr1:155305846-155532608	-	28	10638	0	0	1.85929	0	0	2.7652
MSTRG.2263.2	MSTRG.2263	chr1:155305846-155532629	-	29	10802	5.34564	2.5767	0.596428	7.74663	0	0
MSTRG.2263.3	MSTRG.2263	chr1:155305846-155532931	-	28	10667	3.75563	0	0	0	0	1.96769
MSTRG.2263.4	MSTRG.2263	chr1:155305846-155658364	-	29	11140	3.73007	7.0906	0	1.70721	0.003391	0
MSTRG.2269.1	MSTRG.2269	chr1:155437389-155441257	-	2	3250	1.39772	1.28862	0.917888	0.392994	0.368165	0.827054
MSTRG.2271.1	MSTRG.2271	chr1:155534843-155540529	+	2	2257	2.59395	2.80271	1.95145	0.695927	0.403645	1.30195
MSTRG.2276.11	MSTRG.2276	chr1:155580054-155584722	+	14	2421	2.57908	1.32766	2.04787	2.4032	1.45543	2.6715
MSTRG.2263.13	MSTRG.2263	chr1:155582643-155630036	-	10	3639	0.732374	0.805679	0.597504	0.566586	0.80252	1.04206
MSTRG.2263.15	MSTRG.2263	chr1:155585797-155587395	-	2	669	0	0	0	1.27705	0	0
MSTRG.2263.16	MSTRG.2263	chr1:155596546-155618519	-	4	1472	8.13019	6.73157	7.12491	2.39902	1.96963	2.18919
MSTRG.2277.6	MSTRG.2277	chr1:155658874-155708762	+	14	1783	10.4386	6.22797	10.4967	8.53022	8.14124	9.3304
MSTRG.2279.1	MSTRG.2279	chr1:155715575-155717962	+	8	1133	0.849564	0.267243	0.50734	1.84765	1.09707	0.336678
MSTRG.2280.1	MSTRG.2280	chr1:155717727-155719389	-	2	614	1.4966	0.901333	0.849931	1.7621	1.30721	1.18689
MSTRG.2282.1	MSTRG.2282	chr1:155720726-155721370	+	1	645	1.79895	1.63085	1.62116	0.27586	0.39465	0.808387
MSTRG.2281.18	MSTRG.2281	chr1:155792238-155826995	-	5	918	0.383458	0.454711	0.592302	0.562947	1.23056	0.581051
MSTRG.2281.21	MSTRG.2281	chr1:155820015-155826995	-	3	1238	1.10438	0.770526	1.00446	1.32512	0.818716	1.37849
MSTRG.2254.3	MSTRG.2254	chr1:155870065-155880953	-	5	953	1.25964	0.000301	0.167594	0.213611	0.576296	0.19285
MSTRG.2255.4	MSTRG.2255	chr1:155882836-155895554	-	7	3583	9.66768	8.24552	11.4708	6.34864	5.2806	18.168
MSTRG.2255.2	MSTRG.2255	chr1:155882836-155904164	-	13	4372	12.7303	12.1087	14.6396	7.19069	5.44147	10.8458
MSTRG.2255.3	MSTRG.2255	chr1:155882836-155904181	-	14	2837	15.9836	16.412	16.2775	22.8476	21.9099	16.2838
MSTRG.2255.8	MSTRG.2255	chr1:155885455-155895554	-	6	1854	2.42077	3.929	3.52907	1.53054	0.864041	3.59279
MSTRG.2259.5	MSTRG.2259	chr1:155916647-155922512	-	8	2187	1.94769	0.9042	28.3311	1.08696	0.792539	1.40799
MSTRG.2260.1	MSTRG.2260	chr1:155920623-155920928	+	1	306	0.115567	0.267396	0	0.178476	1.09683	0.150991
MSTRG.2259.17	MSTRG.2259	chr1:155935115-155953199	-	7	633	4.51469	5.07988	3.9457	3.04957	2.07227	3.79471
MSTRG.2259.16	MSTRG.2259	chr1:155935115-155953454	-	7	784	6.77325	5.19524	9.96072	0.702562	1.31028	0.942305
MSTRG.2285.1	MSTRG.2285	chr1:156005092-156023561	-	11	3693	0.180682	10.178	13.5212	11.3356	9.59676	13.6435
MSTRG.2287.3	MSTRG.2287	chr1:156024612-156028297	+	4	832	11.2632	0.716766	11.9843	26.9992	4.59942	14.0298
MSTRG.2291.1	MSTRG.2291	chr1:156084505-156108888	-	12	2191	1.65146	2.15269	1.53251	1.92316	2.50524	1.68841
MSTRG.2290.17	MSTRG.2290	chr1:156096336-156109879	+	13	2162	16.9205	0.232661	7.5464	4.92144	11.6164	9.51052
MSTRG.2292.1	MSTRG.2292	chr1:156163441-156182586	+	5	3730	0	0	0	0.015091	0.005803	2.22294
MSTRG.2292.3	MSTRG.2292	chr1:156163880-156182586	+	5	4210	1.47924	1.74163	0.141363	9.68856	3.80341	4.66831
MSTRG.2292.4	MSTRG.2292	chr1:156163880-156182586	+	4	3476	0	0	0	1.95236	2.04485	0.958978
MSTRG.2292.5	MSTRG.2292	chr1:156163880-156182586	+	3	3353	0	1.38804	0	1.22276	2.13954	1.62045
MSTRG.2302.4	MSTRG.2302	chr1:156278783-156307997	-	11	1189	0.277673	0.92254	23.5399	16.7718	25.2695	1.01225
MSTRG.2303.1	MSTRG.2303	chr1:156278907-156308012	+	14	1758	0.547312	0.632009	0.570983	0.991852	1.7616	1.02966
MSTRG.2300.1	MSTRG.2300	chr1:156449503-156452261	+	3	257	0	0	0	0	1.3143	0.535623
MSTRG.2306.1	MSTRG.2306	chr1:156495197-156542332	-	39	6331	8.94783	7.86405	11.0698	1.21944	1.04567	1.97569
MSTRG.2306.2	MSTRG.2306	chr1:156495197-156542332	-	37	5900	0.733529	0.646626	0.561506	1.29895	2.08636	1.45424
MSTRG.2311.4	MSTRG.2311	chr1:156561684-156563921	+	5	939	3.70954	4.40152	2.62557	4.01532	7.484	8.27723
MSTRG.2313.1	MSTRG.2313	chr1:156564608-156565723	+	1	1116	0.604009	0.901485	1.17772	0.873346	0.804256	0.689101
MSTRG.2308.1	MSTRG.2308	chr1:156607575-156631216	-	3	9205	3.22342	3.23666	3.40041	0.428291	0.19017	0.40606
MSTRG.2310.2	MSTRG.2310	chr1:156638558-156647189	-	6	5750	0.011458	0.013435	0.007824	0.1603	0.04604	2.40294
MSTRG.2310.3	MSTRG.2310	chr1:156638558-156647189	-	3	5430	0	0	0	2.15037	5.35736	1.39027
MSTRG.2310.4	MSTRG.2310	chr1:156638558-156647189	-	4	5339	0	0	0	2.71608	0	1.93326
MSTRG.2314.1	MSTRG.2314	chr1:156669398-156686580	-	7	2161	0.368441	0.174145	0.844311	1.25412	4.75988	4.67354
MSTRG.2314.4	MSTRG.2314	chr1:156669548-156684404	-	5	3188	2.30861	2.23657	0.769368	8.97823	11.9997	12.8136
MSTRG.2315.1	MSTRG.2315	chr1:156669733-156670703	+	3	291	0	0	0	0.886699	1.75685	0.913279
MSTRG.2316.1	MSTRG.2316	chr1:156686846-156687987	-	1	1142	1.20564	0.594704	0.554786	2.39308	2.56879	4.29492
MSTRG.2318.3	MSTRG.2318	chr1:156698741-156703933	+	6	1377	1.16233	0.92319	0.804854	1.97355	1.50511	1.98853
MSTRG.2318.5	MSTRG.2318	chr1:156698752-156706741	+	8	1328	2.78865	5.83706	6.06133	4.79576	6.93146	1.99876
MSTRG.2321.1	MSTRG.2321	chr1:156711915-156721547	+	6	2375	1.63455	2.64462	1.94073	2.23953	2.49334	1.71573
MSTRG.2323.1	MSTRG.2323	chr1:156721709-156726551	+	2	2186	1.11285	0.630532	0.986751	0.146233	0.148365	0.182713
MSTRG.2324.1	MSTRG.2324	chr1:156724561-156725915	+	1	1355	1.51199	1.31322	0.993696	0.241598	0.043153	0.387059
MSTRG.2322.3	MSTRG.2322	chr1:156737345-156770563	+	8	2102	9.54263	17.9304	15.34	20.1447	22.2971	26.6764
MSTRG.2328.6	MSTRG.2328	chr1:156878462-156886220	+	13	5117	1.60342	0.579182	0.900418	1.52214	1.34128	2.73069
MSTRG.2331.2	MSTRG.2331	chr1:156904637-157014865	-	39	6417	0.00135	2.69785	0.033922	0.831265	4.77705	0.090286
MSTRG.2331.4	MSTRG.2331	chr1:156904644-157014865	-	40	6530	4.96226	2.20193	5.12222	1.77262	2.64528	4.15205
MSTRG.2329.2	MSTRG.2329	chr1:157090995-157108266	-	6	5252	0	0	0.923224	2.25114	0	0
MSTRG.2329.3	MSTRG.2329	chr1:157091010-157108266	-	5	5331	3.02142	1.35439	6.04696	9.0114	10.7887	8.47171
MSTRG.2334.3	MSTRG.2334	chr1:157963120-158070052	+	15	7811	13.921	12.6699	3.32744	16.162	12.9063	3.15848
MSTRG.2334.4	MSTRG.2334	chr1:157963400-158065443	+	16	3071	0.019189	0	1.48338	0	0	0
MSTRG.2334.5	MSTRG.2334	chr1:157963400-158070052	+	16	7188	0	2.56791	0	0	0	0
MSTRG.2338.1	MSTRG.2338	chr1:158971374-158985420	-	2	695	0.819405	0.400875	1.99485	0.512863	0.257793	0.528004
MSTRG.2338.2	MSTRG.2338	chr1:158983384-158985447	-	2	353	0.48693	1.16032	0.47048	0.18939	0.149501	0
MSTRG.2339.1	MSTRG.2339	chr1:159023369-159024667	-	2	203	0.100434	1.15585	0.331161	0.35715	0.269798	0.727951
MSTRG.2345.1	MSTRG.2345	chr1:159824751-159837475	+	3	7612	5.7262	0.05608	0.566472	0.834234	0.333826	0.781351
MSTRG.2345.2	MSTRG.2345	chr1:159824785-159837474	+	3	7920	0.019208	1.52525	1.01059	0.376249	0.464973	0.698021
MSTRG.2341.1	MSTRG.2341	chr1:159887982-159895284	+	5	1281	1.0234	0.945281	0.915602	1.43848	2.03519	1.5288
MSTRG.2340.5	MSTRG.2340	chr1:159888628-159894341	-	5	685	17.1955	6.82012	2.14442	1.70316	6.32244	2.67799
MSTRG.2356.1	MSTRG.2356	chr1:160182989-160183454	-	2	310	0.654774	0.392486	0.677102	0.647499	1.31783	0
MSTRG.2355.7	MSTRG.2355	chr1:160187137-160232215	-	15	2347	0.58576	3.12218	4.57301	4.66031	3.87095	3.68874
MSTRG.2355.11	MSTRG.2355	chr1:160187137-160232226	-	13	5949	3.49272	3.36269	3.73484	1.83792	1.18057	3.22423
MSTRG.2361.1	MSTRG.2361	chr1:160288007-160288259	+	1	253	3.61638	4.39893	4.7202	4.61511	4.57147	3.91731
MSTRG.2363.5	MSTRG.2363	chr1:160313177-160326724	+	15	1912	0.880599	0.989938	1.0407	0.89424	0.722509	1.14924
MSTRG.2363.10	MSTRG.2363	chr1:160319446-160326544	+	12	1401	1.51936	0.584489	1.74729	0.177257	0.098747	0.292943
MSTRG.2366.1	MSTRG.2366	chr1:160930244-161014731	-	12	1684	0	0	0	1.42736	0	0
MSTRG.2364.2	MSTRG.2364	chr1:161040884-161047263	-	6	2316	0	0	0	0	0.785759	1.5293
MSTRG.2371.1	MSTRG.2371	chr1:161070392-161087842	+	4	572	1.07417	1.25598	1.53142	1.38236	2.20904	0.400203
MSTRG.2371.2	MSTRG.2371	chr1:161070537-161087830	+	2	202	1.59668	0	0.454221	0	0.466118	0
MSTRG.2373.11	MSTRG.2373	chr1:161092123-161101898	-	6	1971	1.32563	0.970034	2.07117	1.55638	0.94208	1.99467
MSTRG.2374.1	MSTRG.2374	chr1:161102313-161103403	+	1	1091	1.1335	0.695976	0.78819	0.395968	0.099687	0.675104
MSTRG.2376.5	MSTRG.2376	chr1:161123784-161128646	+	6	901	11.6452	18.3587	12.7667	11.3602	8.52005	8.11294
MSTRG.2387.3	MSTRG.2387	chr1:161719570-161726952	+	6	1273	14.9329	8.96928	15.5725	12.478	17.8059	13.7864
MSTRG.2387.6	MSTRG.2387	chr1:161722189-161726952	+	3	2061	1.90678	1.80813	2.47929	1.90977	1.76752	1.70284
MSTRG.2389.2	MSTRG.2389	chr1:161736084-161858971	+	14	3629	1.95049	2.43108	2.29442	5.79976	6.43788	6.14261
MSTRG.2392.2	MSTRG.2392	chr1:162039566-162356608	+	12	5610	0.948775	3.09744	2.73087	4.70093	3.44487	4.82118
MSTRG.2400.3	MSTRG.2400	chr1:162531333-162569621	+	11	2326	14.5221	14.2054	9.35595	4.22032	10.3132	4.65008
MSTRG.2403.13	MSTRG.2403	chr1:163214295-163291531	-	6	1119	1.67617	1.1244	0.560893	0.464683	0.107506	0.119894
MSTRG.2423.5	MSTRG.2423	chr1:165696775-165738074	-	8	1109	2.09847	0	0	0	0	0
MSTRG.2424.1	MSTRG.2424	chr1:165712461-165738011	+	6	434	0	0.18811	1.31182	0.511615	0.401208	1.17237
MSTRG.2424.2	MSTRG.2424	chr1:165723476-165738106	+	4	285	1.14777	1.17353	0	1.75038	1.95877	0
MSTRG.2427.1	MSTRG.2427	chr1:165796768-165880855	+	8	4843	12.5982	14.5053	11.5927	9.66896	11.0348	0
MSTRG.2422.1	MSTRG.2422	chr1:165892275-165899566	+	1	7292	0.374635	0.376154	0.403594	1.1061	0.992901	1.14569
MSTRG.2429.1	MSTRG.2429	chr1:166808684-166825581	+	6	5929	2.80077	2.77136	2.55458	2.74203	3.04627	2.57601
MSTRG.2429.8	MSTRG.2429	chr1:166808696-166823706	+	3	5812	3.8689	3.10363	4.37189	2.30676	2.65539	2.91995
MSTRG.2429.9	MSTRG.2429	chr1:166808696-166823706	+	5	5012	0.950687	0.954766	0.838441	0.921698	0.978222	1.04933
MSTRG.2436.1	MSTRG.2436	chr1:167691226-167691427	-	1	202	2.41075	1.66431	1.63339	1.39335	3.35588	1.89505
MSTRG.2435.6	MSTRG.2435	chr1:167691230-167760056	+	7	1878	2.57649	2.00869	2.69519	1.06014	5.1273	2.9874
MSTRG.2435.7	MSTRG.2435	chr1:167691230-167760056	+	6	1775	2.62035	1.91718	2.31376	5.00325	7.53491	6.90695
MSTRG.2440.1	MSTRG.2440	chr1:168024599-168025660	-	2	933	18.1184	17.4861	16.6222	14.3158	14.7071	13.9529
MSTRG.2442.1	MSTRG.2442	chr1:168048630-168106268	-	6	8065	1.7102	0	0.84981	2.77043	3.51411	2.86723
MSTRG.2442.2	MSTRG.2442	chr1:168048630-168106268	-	6	8794	0.031909	0	0.969498	2.13475	0.875713	2.10499
MSTRG.2443.3	MSTRG.2443	chr1:168195246-168222263	+	7	11004	0.810671	0	0	4.63689	3.24103	2.06556
MSTRG.2443.4	MSTRG.2443	chr1:168195246-168222263	+	4	10749	0	0	0	0	1.57557	0
MSTRG.2449.3	MSTRG.2449	chr1:169075573-169101996	+	7	2558	0	3.5931	0.002017	0.676466	0.007703	0.015439
MSTRG.2450.1	MSTRG.2450	chr1:169075881-169076156	-	1	276	0.53605	0.208854	0	0.961846	1.93636	1.73006
MSTRG.2448.1	MSTRG.2448	chr1:169483404-169494730	-	8	1575	0	0	0	1.00178	1.31755	0.802126
MSTRG.2463.3	MSTRG.2463	chr1:169762283-169763830	-	2	1369	0.560314	0.272117	0.734818	0.977663	0.438814	1.21504
MSTRG.2460.3	MSTRG.2460	chr1:169764184-169826076	+	24	6707	0.347477	0.216908	1.04044	0.606002	0.068817	0.995948
MSTRG.2460.7	MSTRG.2460	chr1:169764220-169842473	+	26	7870	2.21939	3.69733	3.57429	2.17474	2.73766	2.47448
MSTRG.2460.8	MSTRG.2460	chr1:169764220-169842493	+	27	5678	1.95178	1.03718	0.00869	0.002334	0.393561	0.978514
MSTRG.2467.3	MSTRG.2467	chr1:170501292-170522587	+	5	2171	5.96209	3.79064	5.34976	5.248	5.48069	4.39774
MSTRG.2467.5	MSTRG.2467	chr1:170501804-170522587	+	6	3138	1.56504	1.41322	0.461256	0.265127	0.275626	1.4355
MSTRG.2471.1	MSTRG.2471	chr1:171239064-171239479	-	1	416	0.645083	1.46874	1.06961	0.989376	1.44837	0.539418
MSTRG.2474.5	MSTRG.2474	chr1:171454735-171562650	+	35	10389	6.32473	6.09807	5.30948	4.52823	4.36583	4.77299
MSTRG.2474.6	MSTRG.2474	chr1:171454735-171562650	+	34	10336	4.82721	4.46805	4.52196	3.97294	3.76086	3.9524
MSTRG.2477.1	MSTRG.2477	chr1:171501559-171505204	-	3	749	2.8914	2.83955	2.44673	2.6129	2.85603	3.40423
MSTRG.2474.13	MSTRG.2474	chr1:171556212-171562650	+	3	2201	0.728924	1.12089	1.71187	3.69547	3.20438	3.19221
MSTRG.2474.14	MSTRG.2474	chr1:171556212-171562650	+	4	2254	1.21974	0.607452	0.918256	2.08652	2.25782	2.1558
MSTRG.2474.16	MSTRG.2474	chr1:171556801-171562650	+	4	2379	1.84167	0.934724	1.6742	2.72091	3.34558	3.24651
MSTRG.2478.6	MSTRG.2478	chr1:171750842-171766043	+	9	2328	0	0	0	0	3.34394	0
MSTRG.2478.7	MSTRG.2478	chr1:171750842-171766043	+	9	2323	0	0	0	0	2.63857	0
MSTRG.2478.5	MSTRG.2478	chr1:171750842-171766857	+	9	3135	4.23597	5.11922	5.01131	6.55025	5.08294	5.81807
MSTRG.2478.10	MSTRG.2478	chr1:171757003-171766043	+	5	1458	2.68638	1.29188	1.38262	1.18873	0.754891	1.6676
MSTRG.2488.6	MSTRG.2488	chr1:172502523-172580971	+	21	5209	0.440478	0.919967	0.565453	3.19382	0.177983	0.466038
MSTRG.2488.10	MSTRG.2488	chr1:172538167-172540927	+	4	671	0.15517	0.042377	0.693826	1.22632	0.889723	1.3109
MSTRG.2488.9	MSTRG.2488	chr1:172538167-172580971	+	12	4064	1.9381	0	0	5.2873	8.74414	4.04349
MSTRG.2493.1	MSTRG.2493	chr1:173764079-173793611	-	7	7043	4.65133	4.80606	4.50529	3.71973	2.79576	3.42024
MSTRG.2493.3	MSTRG.2493	chr1:173768988-173793460	-	6	1845	3.23505	1.04777	0.789026	2.89472	0.97909	2.43325
MSTRG.2500.19	MSTRG.2500	chr1:173833172-173837127	-	12	505	2.07403	6.44432	1.94586	1.09641	3.10752	1.31168
MSTRG.2502.1	MSTRG.2502	chr1:173835005-173837112	+	6	202	0.422484	2.49263	1.73939	0.843223	0.534548	0
MSTRG.2505.3	MSTRG.2505	chr1:174128719-174957944	+	25	3082	0.923341	0.784964	0.392557	0.627389	1.02056	3.36434
MSTRG.2505.4	MSTRG.2505	chr1:174128719-174964444	+	25	8428	0.614033	1.38765	1.5316	0.780529	0	0
MSTRG.2516.3	MSTRG.2516	chr1:174968607-174980846	+	7	2629	51.0073	10.7093	49.5459	10.9875	16.1072	13.614
MSTRG.2517.1	MSTRG.2517	chr1:174976305-174992551	-	7	1770	3.64888	0.383428	0.336289	0.327347	0.210589	0.423161
MSTRG.2517.2	MSTRG.2517	chr1:174979518-174992561	-	4	1770	0.79016	0.860772	1.02177	0.583579	0.49856	0.691335
MSTRG.2520.1	MSTRG.2520	chr1:175076141-175076876	-	1	736	0.729602	1.09964	0.52166	1.1475	0.730992	1.72371
MSTRG.2522.4	MSTRG.2522	chr1:175913968-176176114	-	19	2457	3.63675	4.2177	2.87118	3.02851	4.15268	0.471619
MSTRG.2522.6	MSTRG.2522	chr1:175913989-176153800	-	19	2049	13.4012	12.0226	9.24135	10.4866	8.24949	16.4868
MSTRG.2535.4	MSTRG.2535	chr1:178694400-178890976	+	17	7209	8.4288	8.59896	8.69607	9.8039	10.0448	10.0242
MSTRG.2531.1	MSTRG.2531	chr1:178994939-179045697	+	8	5836	0.547838	0	2.19868	0	5.58681	0
MSTRG.2531.4	MSTRG.2531	chr1:178995063-179045697	+	8	5948	1.10858	2.69975	0	13.1624	9.36254	6.20361
MSTRG.2531.5	MSTRG.2531	chr1:179039206-179045697	+	2	3222	7.4555	0	4.87299	0	0	3.88826
MSTRG.2533.1	MSTRG.2533	chr1:179046604-179047638	+	1	1035	0.235862	0.100175	0.480047	1.13426	1.83138	1.87971
MSTRG.2539.2	MSTRG.2539	chr1:179051180-179065131	+	7	2034	1.91759	3.73732	3.03304	1.53681	0.616447	2.46377
MSTRG.2539.4	MSTRG.2539	chr1:179051205-179065101	+	6	1713	11.5775	8.18501	9.36208	6.97207	8.66522	7.75982
MSTRG.2539.5	MSTRG.2539	chr1:179051205-179065126	+	3	1467	0	0	0	0	1.39886	0
MSTRG.2539.10	MSTRG.2539	chr1:179051316-179065103	+	6	1739	0.75647	0.731007	0.023859	1.55758	0.004718	0.752739
MSTRG.2540.1	MSTRG.2540	chr1:179052752-179053478	-	1	727	0.074454	0	0	0.545232	0.532175	1.26791
MSTRG.2548.3	MSTRG.2548	chr1:179262937-179327812	+	17	5606	0	0	11.4913	0	0	23.1883
MSTRG.2549.2	MSTRG.2549	chr1:179809203-179846907	-	4	6128	1.74196	0	0	0	0	0
MSTRG.2549.4	MSTRG.2549	chr1:179813066-179846907	-	8	4700	0.052685	0	0.585753	0.770142	0.282262	1.20648
MSTRG.2549.3	MSTRG.2549	chr1:179813066-179846917	-	7	4597	0.147751	0.807278	0.595622	1.31495	0.972148	1.36555
MSTRG.2549.10	MSTRG.2549	chr1:179829645-179846907	-	4	4892	0	0	0	0	0	9.87922
MSTRG.2553.5	MSTRG.2553	chr1:179955317-180082515	+	37	10130	3.31795	0	0	0	0	0
MSTRG.2553.3	MSTRG.2553	chr1:179955317-180083995	+	37	13050	1.92844	9.29094	6.74858	6.15554	5.07813	12.429
MSTRG.2553.4	MSTRG.2553	chr1:179955317-180084010	+	38	11824	3.00324	2.05804	3.34464	1.43678	1.18085	0.385507
MSTRG.2553.15	MSTRG.2553	chr1:180067765-180083995	+	4	2842	1.3681	0.510505	0.93317	0.48514	1.68429	0.001979
MSTRG.2556.3	MSTRG.2556	chr1:180124032-180167151	+	13	2792	20.869	20.2095	20.7124	15.6893	18.0978	15.4263
MSTRG.2556.5	MSTRG.2556	chr1:180145063-180168897	+	10	3842	1.25529	4.25815	0.608704	4.55855	1.87576	3.58741
MSTRG.2571.11	MSTRG.2571	chr1:181013852-181031074	+	6	7819	0.571898	0.564885	0.552601	0.759381	0.8888	1.12164
MSTRG.2572.1	MSTRG.2572	chr1:181057848-181062035	+	2	3641	0	1.14628	1.12548	8.49286	12.3054	8.26816
MSTRG.2573.1	MSTRG.2573	chr1:181057853-181059483	-	1	1631	0.931559	0.774334	0.607105	1.78597	2.32109	2.32373
MSTRG.2576.1	MSTRG.2576	chr1:182806325-182808691	-	1	2367	1.62384	1.70889	1.23669	0.413105	0.327893	0.550856
MSTRG.2577.2	MSTRG.2577	chr1:182808869-182856882	+	28	4318	0	0	0	0	20.756	0
MSTRG.2579.1	MSTRG.2579	chr1:182910946-182911236	-	1	291	12.8712	14.9959	12.503	14.8603	16.0084	13.9309
MSTRG.2583.6	MSTRG.2583	chr1:183103825-183114725	+	7	2501	2.35135	2.99922	4.32203	9.2756	9.35389	5.21047
MSTRG.2584.1	MSTRG.2584	chr1:183104273-183109574	-	4	414	0.305505	0	0.897285	1.36658	0.822001	1.16675
MSTRG.2586.3	MSTRG.2586	chr1:183217373-183387508	-	10	5352	0.380267	0	2.76918	3.39694	1.21953	0
MSTRG.2591.10	MSTRG.2591	chr1:183441702-183521398	+	22	3644	0	0	3.23911	0	0	0
MSTRG.2591.11	MSTRG.2591	chr1:183441702-183523321	+	23	5532	0	0	0	8.429	0	0
MSTRG.2591.12	MSTRG.2591	chr1:183441702-183523321	+	23	5670	0	0	0	9.36949	0	0
MSTRG.2593.7	MSTRG.2593	chr1:183532407-183560011	-	13	1428	0.217902	0.214862	0.04998	6.08476	6.02278	5.26536
MSTRG.2593.8	MSTRG.2593	chr1:183532407-183560011	-	13	1211	0	0	0	0.822702	1.23571	0.758757
MSTRG.2594.3	MSTRG.2594	chr1:183582348-183593545	+	3	6908	0.003057	0.010403	0.005796	0	1.06768	0
MSTRG.2594.6	MSTRG.2594	chr1:183582348-183593545	+	3	8401	0.158627	0.11773	0.16954	2.21756	1.31465	1.95434
MSTRG.2594.8	MSTRG.2594	chr1:183582348-183597241	+	4	6825	0.006748	0	0.016573	1.28266	0.272158	0.61132
MSTRG.2594.1	MSTRG.2594	chr1:183582348-183600239	+	6	2078	0	0.541037	0.136072	1.18501	3.42902	2.27518
MSTRG.2594.5	MSTRG.2594	chr1:183582348-183605033	+	9	3004	0	0.158469	0.06492	1.0739	0.928913	0
MSTRG.2594.12	MSTRG.2594	chr1:183582351-183588539	+	3	1918	0	0	0	0	3.38511	0
MSTRG.2594.11	MSTRG.2594	chr1:183582351-183605036	+	7	2003	0.571483	0.619523	0.487694	0	0	1.98304
MSTRG.2594.14	MSTRG.2594	chr1:183582355-183599244	+	5	2113	0.199103	0.321739	0.600168	6.18346	6.05954	5.26001
MSTRG.2594.13	MSTRG.2594	chr1:183582355-183600239	+	6	2190	0.049102	0	0.00016	0	1.30913	0.652206
MSTRG.2594.15	MSTRG.2594	chr1:183582403-183599244	+	6	4923	0.011567	0	0.007013	0	0.09415	1.19401
MSTRG.2594.16	MSTRG.2594	chr1:183582403-183599244	+	6	2757	0	0	0	0	2.17403	1.52053
MSTRG.2594.17	MSTRG.2594	chr1:183582417-183588469	+	3	872	8.44198	7.83745	8.76823	119.942	148.407	136.475
MSTRG.2595.1	MSTRG.2595	chr1:183582689-183582934	-	1	246	0.374789	0.115589	0.153743	1.16602	0.550079	0.298
MSTRG.2596.3	MSTRG.2596	chr1:183595329-183604817	-	4	1815	58.026	20.4909	7.74016	24.0087	61.9457	9.96396
MSTRG.2597.1	MSTRG.2597	chr1:183605201-183898007	+	18	5350	0.587894	0.471295	0.458548	0.635909	3.14025	1.63196
MSTRG.2588.7	MSTRG.2588	chr1:184023495-184064980	+	3	368	3.68911	5.5144	2.25836	0.963416	0.851078	1.68708
MSTRG.2589.3	MSTRG.2589	chr1:184659637-184724007	-	19	6540	0	2.51112	1.3429	1.91343	0.059377	0.388529
MSTRG.2589.5	MSTRG.2589	chr1:184659638-184724007	-	20	6588	0.754516	2.18547	1.36576	6.98458	6.01201	9.64708
MSTRG.2601.2	MSTRG.2601	chr1:184760164-185144413	-	2	984	13.8959	0	0	0	0	2.89029
MSTRG.2605.3	MSTRG.2605	chr1:185014668-185070189	+	7	1784	0	0	0.698916	1.2909	1.7414	0
MSTRG.2605.6	MSTRG.2605	chr1:185040785-185070189	+	7	1813	0	1.97508	0.921998	0.729001	0.76205	2.04273
MSTRG.2616.9	MSTRG.2616	chr1:185269378-185286403	-	12	2908	5.23025	4.69743	2.14412	4.7781	1.05536	4.23263
MSTRG.2616.10	MSTRG.2616	chr1:185269378-185286405	-	12	6820	4.55069	3.7881	5.68844	2.17531	1.02553	1.31339
MSTRG.2618.1	MSTRG.2618	chr1:185918953-185919297	-	1	345	0.969597	0.733746	1.79394	6.87756	3.98513	17.7398
MSTRG.2619.1	MSTRG.2619	chr1:185919645-185920469	-	1	825	0.345107	0.452639	0.456024	2.15702	0.976945	6.22421
MSTRG.2625.1	MSTRG.2625	chr1:186280784-186344825	-	52	9704	37.653	20.73	7.50408	4.94672	0	9.15216
MSTRG.2625.4	MSTRG.2625	chr1:186287637-186344825	-	49	7068	0.00876	0.029762	2.53563	0.005287	0.244451	0.030507
MSTRG.2625.5	MSTRG.2625	chr1:186287637-186344825	-	50	7176	0.047832	0.396935	20.9428	5.20486	0.197135	0.239403
MSTRG.2625.9	MSTRG.2625	chr1:186320555-186344825	-	21	3560	3.51872	1.96641	0.925662	0.519576	0.331645	1.38077
MSTRG.2621.1	MSTRG.2621	chr1:186640923-186649904	-	11	4559	0	1.65521	0	0.299022	12.3602	0.30937
MSTRG.2623.1	MSTRG.2623	chr1:186798085-186958113	+	19	2752	0.624966	0	0	2.57518	4.1048	3.28707
MSTRG.2629.1	MSTRG.2629	chr1:192904726-192949378	-	3	646	0.11547	0	0.056372	1.55139	1.24789	0.993329
MSTRG.2640.10	MSTRG.2640	chr1:192987752-192993052	-	4	491	3.98312	2.97375	1.62108	2.31484	0.892554	1.29154
MSTRG.2640.9	MSTRG.2640	chr1:192987752-193028426	-	12	1255	13.7247	5.69975	9.02951	5.70345	4.25001	8.12706
MSTRG.2642.1	MSTRG.2642	chr1:193028552-193060904	+	10	8593	0.077826	2.95591	0.11192	0.180462	0.125183	0
MSTRG.2642.12	MSTRG.2642	chr1:193038146-193060902	+	9	8648	0	0	0	0	0	2.41804
MSTRG.2633.1	MSTRG.2633	chr1:193224303-193234493	+	1	10191	2.03207	1.63751	1.98531	1.01812	0.78554	1.22857
MSTRG.2637.1	MSTRG.2637	chr1:193252356-193252776	+	1	421	1.1837	0.470494	0.541099	0.111299	0.157408	0.482068
MSTRG.2638.1	MSTRG.2638	chr1:193253991-193257393	+	1	3403	0.99672	1.17568	1.05534	0.444943	0.38403	0.859741
MSTRG.2639.1	MSTRG.2639	chr1:194376646-194376932	+	1	287	0	0.70095	0.573595	1.24103	0.226147	1.29787
MSTRG.2646.1	MSTRG.2646	chr1:196876503-196902856	-	4	3266	1.74276	1.59981	1.40296	1.46946	1.12262	1.61634
MSTRG.2646.2	MSTRG.2646	chr1:196881210-196902843	-	3	978	1.39551	1.91173	1.57967	0.919693	0.800583	1.15214
MSTRG.2647.4	MSTRG.2647	chr1:197053262-197115824	-	26	6218	0.295259	0.753789	0.448122	1.17473	0.215127	0.889096
MSTRG.2647.6	MSTRG.2647	chr1:197053363-197115813	-	26	12144	23.1791	19.9323	22.0197	21.8203	10.969	23.3888
MSTRG.2652.2	MSTRG.2652	chr1:197473885-197744322	-	23	8221	2.04455	2.05083	0	0.05267	0.011008	1.60932
MSTRG.2651.1	MSTRG.2651	chr1:198004266-198010763	+	3	279	0	0	0	0	0	1.73541
MSTRG.2664.1	MSTRG.2664	chr1:200370099-200373509	-	1	3411	1.11551	0.94886	0.947232	0.502375	0.490497	0.769232
MSTRG.2665.1	MSTRG.2665	chr1:200374068-200379137	-	3	4666	0	0.04179	0.086564	12.3181	0	0
MSTRG.2667.3	MSTRG.2667	chr1:200520630-200589862	-	31	7252	0.699886	0	2.78728	6.05335	0	0
MSTRG.2668.4	MSTRG.2668	chr1:200613167-200639097	-	8	3442	2.64875	0.280109	0.34009	2.47724	1.62798	2.87217
MSTRG.2668.5	MSTRG.2668	chr1:200613167-200639097	-	9	2554	0	2.07836	0	0	0	0
MSTRG.2668.6	MSTRG.2668	chr1:200613167-200639097	-	9	2557	0.245834	0.094917	11.2256	0.866107	2.09679	0.085108
MSTRG.2672.2	MSTRG.2672	chr1:200936156-200992821	-	36	11898	1.30594	0.057866	1.2409	1.31306	0.937042	2.73824
MSTRG.2672.1	MSTRG.2672	chr1:200936156-200992829	-	36	11847	0.402006	0.263065	1.01185	0.772783	0.332411	4.4039
MSTRG.2672.3	MSTRG.2672	chr1:200938449-200992824	-	35	9510	5.17649	8.9317	4.63946	1.15593	5.18568	3.06788
MSTRG.2673.2	MSTRG.2673	chr1:200993089-200997920	+	2	3414	0	0	0	0.666933	0	1.54261
MSTRG.2674.3	MSTRG.2674	chr1:201103901-201140691	-	5	1450	0	1.70807	8.44427	0	2.79048	0
MSTRG.2675.7	MSTRG.2675	chr1:201182224-201198076	+	12	4089	0.949194	0.304658	1.1221	0.031179	0	0.072182
MSTRG.2675.6	MSTRG.2675	chr1:201182224-201198080	+	11	3897	1.2995	0.439517	0.974356	0	0	0
MSTRG.2678.1	MSTRG.2678	chr1:201437878-201438391	+	1	514	0.440887	0.208489	0.395052	1.20943	1.4072	1.24694
MSTRG.2680.1	MSTRG.2680	chr1:201457810-201476238	+	4	626	0.154679	0.494712	0.793968	0.610948	1.08133	0.730447
MSTRG.2681.1	MSTRG.2681	chr1:201476351-201503899	+	5	8094	4.04455	3.67808	3.43972	0.658774	0.538532	0.794595
MSTRG.2681.3	MSTRG.2681	chr1:201487831-201503907	+	3	5554	0.948981	0	1.20992	0.040729	0	0.287622
MSTRG.2682.2	MSTRG.2682	chr1:201592055-201796098	+	30	13458	0	0.528794	1.51383	0.233367	1.55072	0.391149
MSTRG.2682.4	MSTRG.2682	chr1:201592411-201777173	+	17	4000	0	0	0	0.270274	1.19048	0.388364
MSTRG.2689.2	MSTRG.2689	chr1:201798277-201861265	+	31	6536	2.11591	0.977722	3.1038	2.27865	0	4.31918
MSTRG.2689.4	MSTRG.2689	chr1:201816423-201861265	+	28	6206	0.080543	0.089154	0.786421	1.47871	0.79002	2.27628
MSTRG.2697.1	MSTRG.2697	chr1:201954844-201956574	-	1	1731	0.959461	1.07982	0.89546	0.362417	0.168447	0.482766
MSTRG.2698.1	MSTRG.2698	chr1:201964824-201979481	-	3	5317	1.15653	0.000111	0.172105	3.00134	0.833645	2.69335
MSTRG.2698.2	MSTRG.2698	chr1:201964824-201979481	-	3	4717	1.07857	0	1.95173	2.63562	1.15762	3.73852
MSTRG.2698.3	MSTRG.2698	chr1:201964824-201979481	-	4	4389	0	0	0	0.72042	1.17984	0
MSTRG.2698.4	MSTRG.2698	chr1:201964824-201979481	-	3	3463	0	2.90621	0	0	3.61959	0
MSTRG.2698.6	MSTRG.2698	chr1:201968563-201977382	-	2	1040	0.024288	1.10998	0.007425	1.76362	0.014056	0.35493
MSTRG.2692.1	MSTRG.2692	chr1:202113606-202113855	+	1	250	0	0	0.537039	0.518591	0.671262	2.13375
MSTRG.2700.4	MSTRG.2700	chr1:202302138-202311089	-	5	1186	1.44495	4.95714	4.87265	0.539853	1.74982	3.06513
MSTRG.2701.3	MSTRG.2701	chr1:202317848-202557656	+	26	11273	2.78242	2.87014	3.88449	3.41493	0.001641	0
MSTRG.2704.1	MSTRG.2704	chr1:202440937-202441236	-	2	260	0	0.47628	7.04914	0.111813	0	0
MSTRG.2713.1	MSTRG.2713	chr1:202819478-202820592	-	1	1115	0.650992	0.350612	0.902699	1.24795	1.27468	1.83662
MSTRG.2719.2	MSTRG.2719	chr1:202909954-202927137	-	8	2070	43.6436	22.1679	34.3304	21.6199	3.30802	10.9052
MSTRG.2720.1	MSTRG.2720	chr1:202915686-202920205	+	3	318	0.646812	1.85893	0.45393	0.827343	1.14493	0.750513
MSTRG.2721.4	MSTRG.2721	chr1:202931678-202936353	-	9	1081	1.13338	0.081255	0	3.50433	0.874642	1.82604
MSTRG.2723.1	MSTRG.2723	chr1:202976533-202976967	-	2	236	1.01681	1.07865	0	0.810282	1.47585	1.79839
MSTRG.2722.3	MSTRG.2722	chr1:202976902-202989929	+	7	850	1.55867	1.25528	1.45684	1.81776	1.13283	1.63928
MSTRG.2722.5	MSTRG.2722	chr1:202977868-202993976	+	6	2640	10.0769	12.7889	9.74208	9.85675	12.7012	12.3917
MSTRG.2730.1	MSTRG.2730	chr1:203447233-203447605	-	1	373	0.273784	0.148836	1.10477	0.095489	0.155717	0.087528
MSTRG.2732.1	MSTRG.2732	chr1:203482141-203501631	+	3	708	2.21023	1.32809	1.25852	0	0.326773	0.132136
MSTRG.2733.4	MSTRG.2733	chr1:203679368-203713202	+	9	6568	1.52929	0.008718	0.610358	2.50997	0.04471	2.30176
MSTRG.2733.5	MSTRG.2733	chr1:203681940-203713202	+	8	5612	0.678019	0.002103	1.04997	0.004274	0.00034	1.43206
MSTRG.2739.1	MSTRG.2739	chr1:203764782-203823246	+	19	6084	0.674192	1.01914	0.767571	0.71059	0.744985	0.781966
MSTRG.2739.15	MSTRG.2739	chr1:203764842-203771301	+	3	970	1.78256	2.08147	1.35819	0.457798	0.919832	1.36138
MSTRG.2739.13	MSTRG.2739	chr1:203764842-203823162	+	19	5960	0.387297	0.426956	0.349364	0.329397	0.356331	45.9798
MSTRG.2736.1	MSTRG.2736	chr1:203825161-203825829	+	1	669	1.30964	0.76738	0.879613	0.408646	0.020685	0.17066
MSTRG.2737.1	MSTRG.2737	chr1:203903362-203925732	+	3	1364	0.192993	0.301498	0.139733	1.6466	1.23718	0.36718
MSTRG.2737.2	MSTRG.2737	chr1:203922243-203925772	+	2	1209	0	0	0	0	0	1.4119
MSTRG.2743.1	MSTRG.2743	chr1:204042393-204082136	-	2	541	0.495511	0.531972	0.807768	0.86553	1.0801	1.20447
MSTRG.2742.6	MSTRG.2742	chr1:204047257-204096869	+	14	3531	0.313238	0.243717	0.578598	12.8634	2.20805	5.87071
MSTRG.2748.5	MSTRG.2748	chr1:204187981-204347489	-	24	12650	0.77617	1.80492	0.922281	0.740563	1.14327	1.08005
MSTRG.2748.8	MSTRG.2748	chr1:204188000-204257482	-	24	7961	2.68596	5.12113	3.39997	1.9374	3.23216	2.44645
MSTRG.2748.11	MSTRG.2748	chr1:204190349-204328826	-	23	4876	3.57911	0	7.41386	5.02928	0	8.65961
MSTRG.2748.10	MSTRG.2748	chr1:204190349-204347530	-	26	5853	2.62962	3.52733	0.696769	0.337128	7.85952	0.859223
MSTRG.2752.1	MSTRG.2752	chr1:204346574-204350537	+	2	1614	1.68165	2.3857	2.2914	0.39065	0.17788	0.49505
MSTRG.2754.1	MSTRG.2754	chr1:204364940-204380919	-	3	6176	2.8308	3.12681	3.23308	3.21258	3.15461	6.46834
MSTRG.2755.1	MSTRG.2755	chr1:204365023-204369176	+	1	4154	1.13394	0.8638	0.720432	0.111923	0.103272	0.146065
MSTRG.2756.1	MSTRG.2756	chr1:204380063-204381603	+	1	1541	0.836449	1.03521	0.59655	0.27438	0.092837	0.299579
MSTRG.2757.3	MSTRG.2757	chr1:204391760-204463829	-	32	7437	0.052312	0.209629	0.021809	0.001766	1.49617	2.89754
MSTRG.2757.5	MSTRG.2757	chr1:204391766-204463852	-	33	7572	5.54899	0.986909	1.82161	0.989485	1.50125	0.813167
MSTRG.2757.6	MSTRG.2757	chr1:204391769-204422872	-	21	8578	0.178758	4.22421	2.70709	4.95218	1.96037	2.30172
MSTRG.2757.13	MSTRG.2757	chr1:204439820-204463829	-	3	1573	0.237949	0.55994	0.426277	1.30751	1.67103	1.78898
MSTRG.2757.15	MSTRG.2757	chr1:204440753-204450244	-	2	9063	0.65484	0.494766	0.507398	0.753324	0.605592	2.08356
MSTRG.2747.1	MSTRG.2747	chr1:204475656-204475870	+	1	215	1.22103	0.803431	1.20077	1.73026	1.82669	0.749482
MSTRG.2758.7	MSTRG.2758	chr1:204485511-204527247	+	11	6412	0	1.06189	0	0.595554	0	1.98171
MSTRG.2758.13	MSTRG.2758	chr1:204485579-204524335	+	11	6515	0.314943	2.26841	0	0	0	2.38606
MSTRG.2758.19	MSTRG.2758	chr1:204506985-204527247	+	7	9033	1.37928	0	1.48206	0	0	0.157214
MSTRG.2772.1	MSTRG.2772	chr1:205410919-205413951	-	1	3033	1.1681	0.750654	1.02785	0.887118	0.566922	1.08863
MSTRG.2780.4	MSTRG.2780	chr1:205577071-205594986	-	6	6960	0.668375	1.27753	1.50574	0.670103	1.18679	0.853919
MSTRG.2780.3	MSTRG.2780	chr1:205577071-205601090	-	6	10372	0.342577	6.98617	7.27018	5.44539	3.26055	2.47005
MSTRG.2780.7	MSTRG.2780	chr1:205577073-205594761	-	6	9885	1.0142	0.486071	0.279647	0.494316	0	0
MSTRG.2776.1	MSTRG.2776	chr1:205626979-205639091	-	5	3544	0	0	0.833712	0.97856	0.741059	3.09029
MSTRG.2776.4	MSTRG.2776	chr1:205626991-205645775	-	6	3589	0.074896	0.004635	0.014512	0.057905	1.6213	0
MSTRG.2782.2	MSTRG.2782	chr1:205682322-205719399	-	8	6089	0	0	21.5456	0	0	0
MSTRG.2784.1	MSTRG.2784	chr1:205687109-205719142	+	7	1072	1.11959	1.89947	1.81708	0.974609	1.18326	0.76939
MSTRG.2786.3	MSTRG.2786	chr1:205738575-205744574	-	6	1682	1.67037	2.23832	1.57852	3.4231	3.3937	3.6844
MSTRG.2786.6	MSTRG.2786	chr1:205738846-205744574	-	6	1545	3.537	0	0.550133	3.41117	2.56888	1.47133
MSTRG.2788.4	MSTRG.2788	chr1:205758231-205782304	-	10	5604	8.58711	2.90377	10.4249	13.7162	14.1964	15.2514
MSTRG.2788.5	MSTRG.2788	chr1:205760048-205782876	-	11	2855	0.678069	0.188248	1.12955	1.0563	1.18727	1.16601
MSTRG.2787.1	MSTRG.2787	chr1:205859126-205863962	+	3	1310	1.05419	1.56077	1.46337	0.325663	0.424311	0.63704
MSTRG.2789.1	MSTRG.2789	chr1:206134415-206137828	-	3	1248	0.069143	0.219696	2.60481	0.166815	0.319977	1.0881
MSTRG.2791.2	MSTRG.2791	chr1:206511446-206629477	+	19	4118	0.335239	1.3141	0.78161	2.87482	0.977587	6.26323
MSTRG.2791.8	MSTRG.2791	chr1:206516200-206627855	+	18	2463	1.46679	1.21169	0.365482	2.19776	3.44536	0.335533
MSTRG.2791.5	MSTRG.2791	chr1:206516200-206629477	+	19	2606	2.32783	1.11329	2.12329	1.38329	1.46024	1.4612
MSTRG.2791.3	MSTRG.2791	chr1:206516200-206632263	+	19	2539	5.72112	2.64195	2.49753	2.23062	1.05838	2.16679
MSTRG.2791.7	MSTRG.2791	chr1:206516200-206632263	+	20	2581	0	0.008851	0.84033	1.04343	1.53197	1.12492
MSTRG.2794.1	MSTRG.2794	chr1:206674114-206676908	+	1	2795	0.960747	1.0804	1.21527	0.681852	0.565546	1.24991
MSTRG.2799.6	MSTRG.2799	chr1:206730889-206762602	+	5	3103	0.557342	0.524637	0.321271	2.00199	1.60838	2.10127
MSTRG.2802.1	MSTRG.2802	chr1:206744620-206785803	-	17	2226	0.697277	0.050922	2.03428	0.043781	0.071871	1.11758
MSTRG.2802.7	MSTRG.2802	chr1:206769067-206785803	-	11	1360	0	3.17584	0.506612	0.246231	0.101554	0.239026
MSTRG.2802.8	MSTRG.2802	chr1:206769067-206785816	-	13	1586	9.55657	5.03926	3.97587	2.37591	4.11735	2.33849
MSTRG.2803.1	MSTRG.2803	chr1:206776317-206776524	+	1	208	1.21112	1.23036	0.482633	0.009894	0.008433	0
MSTRG.2797.1	MSTRG.2797	chr1:206808881-206828467	+	2	7980	0	0	0	7.95622	0	8.70327
MSTRG.2797.2	MSTRG.2797	chr1:206808881-206828501	+	3	7983	0.001729	0.001621	5.29835	0	0.001068	0
MSTRG.2797.3	MSTRG.2797	chr1:206808881-206828501	+	4	4985	0.300808	1.06302	1.62246	0.103958	0.779546	1.34345
MSTRG.2804.1	MSTRG.2804	chr1:206858268-206902081	-	2	613	0.258425	0.843164	0.586297	0.984405	1.22095	0.781443
MSTRG.2805.1	MSTRG.2805	chr1:206858289-206907613	+	12	2882	0.125237	13.0945	0.338477	1.6338	27.2772	10.202
MSTRG.2805.3	MSTRG.2805	chr1:206858382-206906208	+	11	1337	0	1.46075	0	0	0.692141	0.305769
MSTRG.2807.1	MSTRG.2807	chr1:207058677-207083290	-	5	1101	0.684742	0.671577	1.24446	0.738374	0.239996	0.049679
MSTRG.2811.6	MSTRG.2811	chr1:207226391-207251168	+	15	7149	0	8.64537	0	10.4747	0	0
MSTRG.2814.3	MSTRG.2814	chr1:207262239-207273335	+	8	1186	4.73365	4.58682	4.7283	4.41849	2.64093	2.98797
MSTRG.2814.2	MSTRG.2814	chr1:207262239-207273338	+	7	931	2.26019	2.25583	3.08417	2.41357	3.48812	2.36567
MSTRG.2821.1	MSTRG.2821	chr1:207482769-207487508	+	1	4740	1.34737	1.04414	1.19349	0.199445	0.095275	0.174811
MSTRG.2822.1	MSTRG.2822	chr1:207494853-207547934	+	13	9716	20.2541	15.2697	11.8535	10.543	9.44055	17.8135
MSTRG.2822.5	MSTRG.2822	chr1:207495032-207546594	+	12	8694	16.3548	8.29785	9.48849	20.0652	17.8527	5.70919
MSTRG.2823.1	MSTRG.2823	chr1:207495035-207533806	-	10	2073	0.507031	0.619544	0.689247	1.33682	1.26591	1.06044
MSTRG.2822.9	MSTRG.2822	chr1:207495136-207533846	+	12	2045	0	0	0	1.08816	0.147616	0
MSTRG.2822.11	MSTRG.2822	chr1:207498003-207533058	+	9	986	3.68743	3.17851	4.04867	7.34349	42.088	8.44488
MSTRG.2824.1	MSTRG.2824	chr1:207549975-207551762	+	1	1788	1.15743	1.064	0.934543	0.575033	0.159698	0.990491
MSTRG.2825.1	MSTRG.2825	chr1:207923448-207925353	-	1	1906	1.24879	0.829763	0.868583	0.34949	0.479906	0.30792
MSTRG.2826.12	MSTRG.2826	chr1:207925468-207968569	+	12	4364	0.312967	0.143677	5.42565	0.058173	0.582815	0.595571
MSTRG.2828.1	MSTRG.2828	chr1:207963920-207974783	-	1	10864	0.232392	0.307816	0.300717	0.777658	0.509946	1.59427
MSTRG.2830.2	MSTRG.2830	chr1:208199449-208417665	-	32	9878	0.83108	0.427202	1.02024	1.60446	1.47764	2.38253
MSTRG.2830.4	MSTRG.2830	chr1:208200165-208203648	-	4	1504	0	0.759089	0	2.85663	1.57221	1.55091
MSTRG.2832.1	MSTRG.2832	chr1:209788220-209795980	+	6	1314	0.173012	0.534965	0.265597	0.463817	1.14141	0.650137
MSTRG.2831.4	MSTRG.2831	chr1:209788322-209824679	-	22	3905	9.33833	12.6931	8.38349	18.993	45.1123	20.0592
MSTRG.2831.3	MSTRG.2831	chr1:209788322-209826460	-	22	4405	26.8603	15.8106	30.8102	48.0499	17.7807	42.533
MSTRG.2833.1	MSTRG.2833	chr1:209803119-209804078	+	2	271	0.080559	0.898653	0	0.271038	0.607737	1.13638
MSTRG.2840.4	MSTRG.2840	chr1:210404803-210407545	-	2	428	0.851874	1.86365	1.48862	1.46808	1.8592	2.55056
MSTRG.2841.3	MSTRG.2841	chr1:210410627-210420264	+	5	5213	1.28948	0.737263	0.807648	0.142046	0.067293	0.003297
MSTRG.2845.6	MSTRG.2845	chr1:211432775-211487014	+	13	1827	3.34539	2.28534	1.91067	1.85625	1.69337	3.48159
MSTRG.2846.5	MSTRG.2846	chr1:211500179-211548127	+	10	7794	2.43187	4.02051	6.77107	1.81674	3.03367	5.21958
MSTRG.2846.7	MSTRG.2846	chr1:211509913-211548127	+	10	7782	6.12697	2.83334	0.001435	2.52505	0	0
MSTRG.2847.2	MSTRG.2847	chr1:211556162-211608427	+	7	2347	0	2.17111	0	0	0	0
MSTRG.2852.2	MSTRG.2852	chr1:211812990-211827933	+	3	1008	1.66762	6.23229	3.06298	1.02035	1.24104	1.70332
MSTRG.2852.4	MSTRG.2852	chr1:211813150-211827923	+	3	1009	1.64823	1.08391	2.01957	0.134081	0	0
MSTRG.2856.1	MSTRG.2856	chr1:211916799-212004064	-	9	7876	18.003	15.4981	16.0991	14.2643	4.07861	13.7693
MSTRG.2856.2	MSTRG.2856	chr1:211916799-212004064	-	10	7532	0	0	0	0	2.99397	0
MSTRG.2861.1	MSTRG.2861	chr1:212110204-212208884	-	21	3362	0	0.920506	0	1.67569	1.77121	1.92525
MSTRG.2863.4	MSTRG.2863	chr1:212209848-212277936	+	15	3861	0	0	4.02852	0	0	0
MSTRG.2869.1	MSTRG.2869	chr1:212458879-212535202	+	12	3071	21.5617	20.7991	0	2.46746	5.53699	4.25775
MSTRG.2873.1	MSTRG.2873	chr1:212495433-212588226	-	10	2449	0.079753	0.049093	0.110592	5.28795	3.32374	2.74193
MSTRG.2873.2	MSTRG.2873	chr1:212495433-212588226	-	10	2376	0	0	0	0	1.26688	0.083024
MSTRG.2867.1	MSTRG.2867	chr1:212603308-212606139	-	3	643	1.94832	1.60523	0.662944	0.964032	0	0.121353
MSTRG.2867.2	MSTRG.2867	chr1:212603318-212606139	-	3	638	1.28776	0.447822	1.6962	0.496287	0.759773	1.07209
MSTRG.2879.1	MSTRG.2879	chr1:212763455-212763727	+	1	273	0.806963	1.14715	0.8923	0.934145	1.47359	1.84838
MSTRG.2885.1	MSTRG.2885	chr1:212894093-212896448	-	1	2356	1.17469	0.764217	1.03618	0.584891	0.418356	0.763366
MSTRG.2887.1	MSTRG.2887	chr1:212904673-212905749	-	1	1077	0.843163	0.782183	0.769638	0.616298	0.20088	1.14305
MSTRG.2890.5	MSTRG.2890	chr1:213170542-213188835	-	8	1647	1.04366	1.10957	1.26629	0.431682	1.09911	1.78349
MSTRG.2891.5	MSTRG.2891	chr1:213224597-213436159	+	13	3147	3.57427	0.30971	0.802221	3.69914	8.28572	9.013
MSTRG.2891.9	MSTRG.2891	chr1:213299143-213446807	+	9	3422	1.38963	0.595218	5.15749	1.26253	2.70314	2.59556
MSTRG.2892.4	MSTRG.2892	chr1:214454576-214510473	+	10	1374	0	0	4.05051	9.71297	11.7101	4.15952
MSTRG.2893.1	MSTRG.2893	chr1:214517515-214724945	-	20	4634	0.274485	0.051174	0	4.09798	0	0.055535
MSTRG.2893.3	MSTRG.2893	chr1:214522039-214725792	-	20	13175	0.188471	0.227392	0.595391	1.07843	0.945841	3.67529
MSTRG.2893.5	MSTRG.2893	chr1:214522044-214530958	-	2	8332	0	0	0	3.94767	2.46849	0
MSTRG.2899.1	MSTRG.2899	chr1:214832338-214837132	-	2	233	0.134163	0	0.232748	0.92874	1.30245	0.725178
MSTRG.2905.1	MSTRG.2905	chr1:216321533-216321748	+	1	216	0.14571	0.078142	0.093037	0.633021	0.652783	1.6879
MSTRG.2911.1	MSTRG.2911	chr1:217777573-217781477	-	1	3905	1.44669	1.27028	1.50281	1.13588	1.1056	1.54102
MSTRG.2912.3	MSTRG.2912	chr1:217804684-218040930	+	11	1836	2.74232	3.15217	3.61502	1.45749	1.87036	0.894137
MSTRG.2917.1	MSTRG.2917	chr1:218518520-218617338	+	7	5288	2.82228	2.37911	2.36161	11.8874	16.5839	13.7363
MSTRG.2915.1	MSTRG.2915	chr1:218772748-218773192	-	1	445	1.6603	1.43099	1.80448	39.3903	31.3546	37.8649
MSTRG.2919.1	MSTRG.2919	chr1:219347186-219392006	+	6	932	0.641911	0	1.11739	0.943742	1.01485	1.20354
MSTRG.2921.1	MSTRG.2921	chr1:219781567-219782368	-	2	724	2.44702	0	3.24861	0	0	0.922571
MSTRG.2929.1	MSTRG.2929	chr1:220200666-220263804	-	12	2149	0	0.0729	0.646715	13.9655	11.9012	6.35911
MSTRG.2929.2	MSTRG.2929	chr1:220214077-220263195	-	11	1886	0.332252	0	0	0	3.83078	0
MSTRG.2929.4	MSTRG.2929	chr1:220230263-220263175	-	9	1959	1.65334	0	0.066076	0.264172	0.121782	1.56526
MSTRG.2929.3	MSTRG.2929	chr1:220230263-220263195	-	9	1509	2.19027	0	2.24948	4.33902	2.48089	3.36094
MSTRG.2929.14	MSTRG.2929	chr1:220236258-220263793	-	8	822	0	0	0.084859	7.21492	6.08543	4.30136
MSTRG.2929.13	MSTRG.2929	chr1:220236258-220263804	-	8	831	6.06532	5.24653	3.35451	6.0135	9.03138	5.59049
MSTRG.2935.1	MSTRG.2935	chr1:220428053-220428345	+	1	293	0.68753	0.2786	0.971855	1.28855	1.23231	0.778677
MSTRG.2937.1	MSTRG.2937	chr1:220863716-220869965	-	2	350	0.307241	0.35371	0.487397	0.90005	1.00127	0.970978
MSTRG.2938.5	MSTRG.2938	chr1:220928314-220957526	+	7	1015	5.00113	3.12424	1.5222	3.15048	3.23468	1.22735
MSTRG.2938.6	MSTRG.2938	chr1:220928314-220957526	+	6	2977	2.57191	1.48604	2.00708	0.858626	0.762627	1.25006
MSTRG.2939.2	MSTRG.2939	chr1:220960196-220982318	+	7	5943	3.68383	2.78764	3.75459	4.03499	3.28267	4.88035
MSTRG.2939.3	MSTRG.2939	chr1:220960262-220987730	+	6	10026	3.63819	3.03023	2.88604	1.37605	0.873632	2.37733
MSTRG.2941.1	MSTRG.2941	chr1:221044930-221054794	-	2	580	0.592297	1.16962	0.899604	0.372278	0	0.384149
MSTRG.2945.1	MSTRG.2945	chr1:222121454-222132042	+	2	6643	0.016242	0	0.018361	0.6724	0.282195	1.15266
MSTRG.2946.2	MSTRG.2946	chr1:222139683-222159244	+	4	2236	0	0	0	1.9264	1.20598	3.61003
MSTRG.2946.1	MSTRG.2946	chr1:222139683-222159311	+	2	3132	0	0.018343	0.05032	1.06588	0.760584	1.09747
MSTRG.2946.5	MSTRG.2946	chr1:222140536-222146407	+	2	3183	0	0	0	1.06169	0.639259	1.88514
MSTRG.2949.3	MSTRG.2949	chr1:222731650-222763228	-	10	1753	12.4388	9.55482	3.94221	3.78493	7.86742	6.96532
MSTRG.2949.7	MSTRG.2949	chr1:222740655-222763228	-	8	3168	2.2451	2.02136	1.59283	1.73833	2.04108	2.29722
MSTRG.2954.2	MSTRG.2954	chr1:222833519-222885866	-	11	7601	0	4.55544	5.11852	2.70075	0.174262	0.302648
MSTRG.2956.1	MSTRG.2956	chr1:222884838-222898879	+	8	2367	1.53891	1.84539	1.84069	2.73914	3.86792	2.22499
MSTRG.2956.7	MSTRG.2956	chr1:222886711-222908538	+	13	3782	42.105	12.6203	5.84384	13.4038	16.6355	4.36248
MSTRG.2957.6	MSTRG.2957	chr1:222988403-223000924	+	3	235	0.687783	0.253225	0.34925	4.23998	0.868762	1.58173
MSTRG.2957.8	MSTRG.2957	chr1:222988403-223010642	+	4	482	1.21162	0.7129	1.23306	1.89407	0.984735	1.62533
MSTRG.2957.7	MSTRG.2957	chr1:222988403-223179663	+	8	4959	2.46903	0.480438	0.167287	0.016317	2.92467	2.83333
MSTRG.2957.14	MSTRG.2957	chr1:222988471-223010642	+	5	681	4.27189	2.77326	4.97368	7.36088	8.64067	7.81628
MSTRG.2957.15	MSTRG.2957	chr1:222988471-223010726	+	4	591	1.3985	1.09962	0.97879	1.62475	1.091	1.62834
MSTRG.2951.1	MSTRG.2951	chr1:223199753-223200078	-	1	326	0	0	0.160429	0.50355	0.257087	1.22577
MSTRG.2964.1	MSTRG.2964	chr1:223934725-223947043	-	8	803	1.123	0.853981	0.936307	0.680513	1.58402	1.55377
MSTRG.2963.4	MSTRG.2963	chr1:223934810-223963720	+	18	2728	1.14634	0.18357	2.98855	2.8403	0.71509	4.09936
MSTRG.2963.6	MSTRG.2963	chr1:223939721-223963549	+	15	2037	53.3666	0	0	0	0	0
MSTRG.2963.11	MSTRG.2963	chr1:223957543-223963601	+	6	1799	6.63187	16.6371	22.0252	29.846	23.5169	24.387
MSTRG.2966.1	MSTRG.2966	chr1:224033672-224034362	+	1	691	1.08439	1.15333	1.03956	0.667106	0.50518	0.165779
MSTRG.2968.2	MSTRG.2968	chr1:224139096-224142325	-	3	1248	0.89108	1.48627	0.76229	0.907537	0.344251	0.8256
MSTRG.2968.5	MSTRG.2968	chr1:224148869-224150412	-	3	363	1.78733	1.83886	1.69426	1.05526	0.496235	0.903891
MSTRG.2968.6	MSTRG.2968	chr1:224148869-224152416	-	3	392	0.039019	1.3504	0.305302	0.101382	0	0
MSTRG.2968.7	MSTRG.2968	chr1:224150533-224180296	-	8	3128	1.68755	1.35028	1.84898	0.324368	0.031544	0.779846
MSTRG.2970.1	MSTRG.2970	chr1:224180436-224198314	+	3	1742	2.24892	3.22951	5.59063	1.54415	1.91109	3.19206
MSTRG.2975.1	MSTRG.2975	chr1:224301817-224302017	-	1	201	0.31238	0.573569	0.249721	0.229181	1.13454	0
MSTRG.2980.1	MSTRG.2980	chr1:224415036-224460485	-	7	3833	0.256121	0.242484	0.347556	1.50869	1.14386	2.84554
MSTRG.2980.11	MSTRG.2980	chr1:224415156-224517889	-	21	2671	16.5118	6.5857	8.64547	1.33729	2.24003	6.96006
MSTRG.2980.22	MSTRG.2980	chr1:224495710-224517823	-	5	534	1.30476	1.27908	4.78282	1.24828	1.37898	0.669635
MSTRG.2984.7	MSTRG.2984	chr1:224544623-224563700	+	4	4101	3.83529	3.38379	3.32919	3.58612	3.61968	6.8077
MSTRG.2985.2	MSTRG.2985	chr1:224572863-224621715	-	15	3470	9.70584	0	0	0	0	0
MSTRG.2985.4	MSTRG.2985	chr1:224573368-224621552	-	15	2522	2.0328	10.8478	0.588603	1.77785	1.39264	2.3706
MSTRG.2985.5	MSTRG.2985	chr1:224573368-224621552	-	15	2570	1.94827	5.74507	0.590149	1.91317	1.4453	2.93219
MSTRG.2985.3	MSTRG.2985	chr1:224573368-224622001	-	14	6301	5.55734	4.39253	11.2717	9.72752	6.45754	10.9221
MSTRG.2987.1	MSTRG.2987	chr1:224621523-224621892	+	1	370	0.434974	0.318384	0.375671	0.546777	1.10729	1.16721
MSTRG.2988.10	MSTRG.2988	chr1:224716925-224725284	+	3	1094	0.117756	0.105382	0.169449	3.98909	2.3143	3.94706
MSTRG.2998.3	MSTRG.2998	chr1:225117363-225161923	+	8	2185	6.18201	4.60472	4.58897	4.58963	2.37032	5.36354
MSTRG.2998.9	MSTRG.2998	chr1:225140398-225155626	+	5	753	0.485142	0.93812	0.775331	0.601415	1.49826	1.40258
MSTRG.2998.10	MSTRG.2998	chr1:225140398-225157531	+	6	820	4.74312	3.63763	5.06597	6.72742	13.0577	7.94744
MSTRG.2998.11	MSTRG.2998	chr1:225140398-225157531	+	7	970	5.29468	7.04749	6.60721	6.52835	4.97087	5.94018
MSTRG.2998.12	MSTRG.2998	chr1:225140398-225162236	+	7	810	3.90616	0	0.022967	0	0	0
MSTRG.2996.2	MSTRG.2996	chr1:225589205-225599119	-	5	4498	13.7528	12.3458	15.7042	14.0825	2.24265	16.3301
MSTRG.3000.4	MSTRG.3000	chr1:225683182-225788055	-	13	4038	8.58864	0.964481	2.16691	1.68631	0.5485	0.691814
MSTRG.3000.2	MSTRG.3000	chr1:225683182-225840747	-	13	4252	8.20872	16.6156	8.90924	0.15024	31.598	29.0653
MSTRG.3000.3	MSTRG.3000	chr1:225683182-225840747	-	14	4368	0.005572	0.04994	9.00645	0.182116	13.0841	20.7966
MSTRG.3000.7	MSTRG.3000	chr1:225684787-225787978	-	14	2413	0.399836	0.298995	0.275564	3.57558	0.293882	0.337233
MSTRG.3001.1	MSTRG.3001	chr1:225702553-225742649	+	4	545	0.292986	1.05094	0.744197	2.12238	2.84422	1.92484
MSTRG.2999.1	MSTRG.2999	chr1:225965515-225978168	+	4	2889	4.76261	6.45975	6.39429	8.57448	9.95228	11.4593
MSTRG.2999.7	MSTRG.2999	chr1:225965637-225977226	+	3	1701	5.26615	4.72462	3.3927	2.7958	9.07131	10.3519
MSTRG.3003.1	MSTRG.3003	chr1:226028164-226070069	-	24	9090	4.06789	4.49573	4.86716	3.28467	2.53519	3.42247
MSTRG.3003.2	MSTRG.3003	chr1:226028206-226070069	-	26	3479	0.43576	0.423753	0.666092	0.865985	0.926471	3.19224
MSTRG.3003.3	MSTRG.3003	chr1:226028584-226033036	-	2	2934	1.25091	1.64886	1.50564	1.13802	1.51948	1.92383
MSTRG.3003.4	MSTRG.3003	chr1:226028584-226071741	-	26	3105	3.56146	4.20053	0	0	0	0
MSTRG.3007.2	MSTRG.3007	chr1:226249978-226259700	+	5	1244	88.0927	99.6013	59.5861	65.7006	0.134672	0.862052
MSTRG.3007.3	MSTRG.3007	chr1:226249978-226259702	+	5	1141	2.33457	2.7438	5.04115	0.003052	0	2.5607
MSTRG.3008.1	MSTRG.3008	chr1:226250432-226259667	-	4	1002	0.646528	0.810485	0.698114	1.09577	1.38924	0.848958
MSTRG.3012.1	MSTRG.3012	chr1:226346969-226374116	+	5	559	0.891482	1.19106	1.01848	1.42399	1.19071	0
MSTRG.3016.1	MSTRG.3016	chr1:226497239-226497637	+	1	399	0.929717	1.22073	1.02091	0.690728	1.08445	0.50482
MSTRG.3013.1	MSTRG.3013	chr1:226543205-226543640	-	1	436	1.11029	0.523961	0.714087	0.106744	0.372828	0.860465
MSTRG.3021.1	MSTRG.3021	chr1:226567753-226595524	+	10	1307	0.557017	1.33155	0.94123	1.4528	1.56053	0.957973
MSTRG.3030.4	MSTRG.3030	chr1:227177567-227288821	-	23	7415	0	0	0	0	0	9.3361
MSTRG.3030.6	MSTRG.3030	chr1:227177567-227288821	-	23	7360	0	0	5.10303	0	0	0
MSTRG.3030.5	MSTRG.3030	chr1:227177567-227504883	-	36	9159	0	0	0.85401	0.786647	5.27405	0.838075
MSTRG.3028.1	MSTRG.3028	chr1:227854804-227855175	+	1	372	0.291011	1.13773	0.931769	0.103831	0	0.197081
MSTRG.3029.1	MSTRG.3029	chr1:227856276-227857075	+	1	800	0.98964	1.19954	0.616454	0.148209	0	0.295691
MSTRG.3037.6	MSTRG.3037	chr1:227919392-227968927	+	7	4831	0.006724	2.64316	0	0.111786	0.001496	0.011675
MSTRG.3037.11	MSTRG.3037	chr1:227923154-227972279	+	5	5255	4.44877	1.91545	4.89379	2.32635	2.15023	5.73531
MSTRG.3041.1	MSTRG.3041	chr1:228270406-228285852	-	5	782	0.894058	1.2786	1.0299	1.02942	1.09766	0.78249
MSTRG.3042.1	MSTRG.3042	chr1:228286194-228286813	-	1	620	0.170823	1.17184	0.837885	0.477964	0.694437	0.390467
MSTRG.3044.1	MSTRG.3044	chr1:228288844-228290234	+	5	462	1.16613	2.84919	0.955009	1.62806	0.799037	1.1757
MSTRG.3045.1	MSTRG.3045	chr1:228290872-228292504	+	1	1633	2.28997	1.235	1.7848	0.663155	0.724488	0.676472
MSTRG.3046.21	MSTRG.3046	chr1:228294381-228296737	-	4	625	1.0199	1.6655	1.31862	1.26355	1.75987	2.86336
MSTRG.3048.2	MSTRG.3048	chr1:228350921-228352942	+	2	1326	1.79744	0.359534	1.30892	0	0	0
MSTRG.3048.3	MSTRG.3048	chr1:228350921-228352942	+	4	1102	1.79925	0.842369	0.899449	0.296181	0	0.219565
MSTRG.3051.1	MSTRG.3051	chr1:228370471-228372123	+	1	1653	1.05866	1.30162	1.6393	0.481987	0.387221	1.22165
MSTRG.3068.6	MSTRG.3068	chr1:228400901-228544604	+	50	12940	3.04521	2.7326	2.86377	0.017492	0.061021	0.043485
MSTRG.3068.11	MSTRG.3068	chr1:228481896-228548955	+	45	10496	8.24627	8.49529	8.05041	5.63999	3.3642	5.50349
MSTRG.3068.16	MSTRG.3068	chr1:228504953-228548955	+	30	6749	0.004496	0	0.130974	1.01196	1.66649	3.31262
MSTRG.3059.1	MSTRG.3059	chr1:228686420-228687653	+	1	1234	1.25304	0.760417	0.989302	0.453606	0.279568	0.470189
MSTRG.3063.1	MSTRG.3063	chr1:228784253-228785814	+	1	1562	7.19454	4.96975	6.33676	1.67857	1.14823	3.01076
MSTRG.3066.2	MSTRG.3066	chr1:228870915-228882404	+	2	4210	0.234166	0	0.451802	1.20821	1.52723	2.12309
MSTRG.3073.1	MSTRG.3073	chr1:229065707-229085518	-	3	2278	0	0	0	0.94687	1.35082	2.59749
MSTRG.3073.2	MSTRG.3073	chr1:229065709-229085541	-	3	3044	0.123347	0.142733	0.078411	1.3856	0.570492	0.751486
MSTRG.3074.1	MSTRG.3074	chr1:229083299-229104124	+	3	3762	0.014244	0	0	1.43212	0.988998	1.67522
MSTRG.3075.1	MSTRG.3075	chr1:229312702-229312935	+	1	234	0	0	0.223504	1.66655	1.30646	1.28057
MSTRG.3072.1	MSTRG.3072	chr1:229313581-229313810	+	1	230	0.11767	0	0	1.00109	0.691922	3.82459
MSTRG.3076.2	MSTRG.3076	chr1:229399311-229406775	-	3	3124	0.496752	2.16791	2.63959	1.23069	0	0
MSTRG.3076.3	MSTRG.3076	chr1:229399509-229406775	-	2	5876	0.217315	2.54911	3.31815	0	1.52222	0
MSTRG.3076.4	MSTRG.3076	chr1:229399617-229407067	-	2	6119	8.36727	0.007993	0.011769	0.430381	0	2.05765
MSTRG.3077.3	MSTRG.3077	chr1:229406879-229465431	+	10	1293	0.038353	0	0.051118	4.10802	10.9897	6.13929
MSTRG.3078.2	MSTRG.3078	chr1:229456758-229478588	-	4	5285	0.769428	0.325454	0.196585	1.1207	0.911712	0.357359
MSTRG.3080.3	MSTRG.3080	chr1:229652333-229692596	-	13	3403	0.825605	0.005381	8.17677	6.45262	2.77962	0.016103
MSTRG.3083.1	MSTRG.3083	chr1:229799355-229805874	+	1	6520	1.45531	1.91178	1.94087	0.785043	0.722952	0.900001
MSTRG.3090.1	MSTRG.3090	chr1:230737027-230744800	+	2	918	0	0	0	28.5464	29.7325	30.8031
MSTRG.3090.2	MSTRG.3090	chr1:230737027-230744800	+	2	3388	0.137816	0	0.109165	24.2359	13.827	30.9419
MSTRG.3091.4	MSTRG.3091	chr1:230778267-230829723	+	17	4867	3.41749	1.52564	2.32855	5.68249	5.68989	5.99596
MSTRG.3093.1	MSTRG.3093	chr1:231003988-231004266	+	1	279	0	0	0	0.177024	1.1415	0.810908
MSTRG.3094.1	MSTRG.3094	chr1:231041989-231114542	-	19	2821	0.199206	0.156212	0.069529	0.104359	2.53108	3.17876
MSTRG.3094.4	MSTRG.3094	chr1:231041995-231114542	-	23	3202	5.06687	4.11144	6.03693	5.63514	1.73823	2.41132
MSTRG.3094.5	MSTRG.3094	chr1:231041995-231114542	-	21	3046	10.3492	8.79628	8.13705	9.06172	3.65257	6.18871
MSTRG.3099.1	MSTRG.3099	chr1:231376967-231377166	-	1	200	0.234555	0.51181	0.226399	1.06774	0.686075	0
MSTRG.3100.1	MSTRG.3100	chr1:231464299-231473598	-	2	8972	0.286044	0.787073	1.31751	1.08916	0.863922	1.57102
MSTRG.3101.2	MSTRG.3101	chr1:231473794-231490769	+	6	3253	0	1.51456	0	2.00882	1.72476	2.42513
MSTRG.3101.3	MSTRG.3101	chr1:231473794-231505555	+	6	1325	3.3284	1.49315	0.148315	0.186735	0.297272	2.21069
MSTRG.3102.1	MSTRG.3102	chr1:231499497-231558481	-	4	4720	0	0	3.47839	16.2405	4.28712	0
MSTRG.3103.1	MSTRG.3103	chr1:231556855-231557502	+	1	648	0.593904	1.04001	0.705803	0.410164	2.01074	1.37299
MSTRG.3108.4	MSTRG.3108	chr1:231658234-231664247	-	2	232	0.399995	0.978262	0.137416	2.71527	3.31947	3.48948
MSTRG.3109.8	MSTRG.3109	chr1:231664413-231702264	+	7	2820	0.351885	0.074778	0.077053	0.042988	0.113226	7.73791
MSTRG.3104.1	MSTRG.3104	chr1:232256965-232257466	+	1	502	0.04277	0	0.051392	0.660351	0.381821	1.15905
MSTRG.3105.1	MSTRG.3105	chr1:232258774-232259018	+	1	245	0.38653	0.768197	0.212227	0.676925	0.97642	2.01887
MSTRG.3106.1	MSTRG.3106	chr1:232367571-232367795	-	1	225	0.068803	0	0.290945	1.15259	2.53217	6.25849
MSTRG.3107.2	MSTRG.3107	chr1:232533714-232765865	-	21	6794	1.40147	0.021012	0.501514	1.17838	0	3.58945
MSTRG.3107.3	MSTRG.3107	chr1:232533714-232765865	-	22	6843	0.060484	0.679943	0.71465	0	1.73844	2.69591
MSTRG.3116.1	MSTRG.3116	chr1:233197795-233198689	-	1	895	0.773718	0.955938	1.60894	0.496125	0.386548	1.03973
MSTRG.3117.1	MSTRG.3117	chr1:233395208-233395522	-	1	315	0	0	0	1.47797	1.33218	1.40252
MSTRG.3113.1	MSTRG.3113	chr1:233463514-233520893	+	11	5952	0	0.106717	0	6.27238	6.0616	4.51367
MSTRG.3120.1	MSTRG.3120	chr1:233749275-233808258	+	4	2536	6.06363	3.51836	4.19958	16.6881	38.5073	34.8604
MSTRG.3120.2	MSTRG.3120	chr1:233749275-233808258	+	4	2609	0	0	0	0	0	8.17438
MSTRG.3121.1	MSTRG.3121	chr1:233749328-233749858	-	1	531	0.145768	0.141343	0.097832	0.691846	1.0953	1.23291
MSTRG.3120.3	MSTRG.3120	chr1:233749328-233807237	+	4	1512	1.19808	0	0	0	0	0
MSTRG.3123.2	MSTRG.3123	chr1:233819253-233824614	-	2	2636	0.532603	0.435954	0.489513	15.7282	10.7971	29.5954
MSTRG.3123.1	MSTRG.3123	chr1:233819253-233824949	-	2	373	1.70723	0	0.366856	13.9446	17.8592	16.6081
MSTRG.3123.3	MSTRG.3123	chr1:233819308-233822388	-	2	352	0.819115	0	0	0.517611	1.16033	2.16066
MSTRG.3119.1	MSTRG.3119	chr1:233833302-233843284	-	2	2158	0.075247	0.063194	0.072869	2.51065	1.51768	2.25046
MSTRG.3124.1	MSTRG.3124	chr1:234040229-234460259	+	9	3293	0	0	0	0.679953	3.32477	0
MSTRG.3124.2	MSTRG.3124	chr1:234040313-234460262	+	7	3037	6.3975	9.98435	0.952624	4.70046	4.25528	6.24017
MSTRG.3124.3	MSTRG.3124	chr1:234040314-234331973	+	3	9868	1.24499	1.00826	1.03277	1.30508	0.539892	2.88014
MSTRG.3131.1	MSTRG.3131	chr1:234492424-234506158	+	3	2807	2.04016	2.05113	1.82405	0.732834	0.456075	0.765404
MSTRG.3134.1	MSTRG.3134	chr1:234508553-234519498	-	4	850	0.509994	1.13236	0.443749	0.320756	0	0.356271
MSTRG.3134.3	MSTRG.3134	chr1:234508577-234509339	-	1	763	3.26997	2.36632	3.86689	1.77876	1.3424	2.3381
MSTRG.3140.4	MSTRG.3140	chr1:234527156-234614849	-	29	4908	0.770794	0.860579	4.43705	2.90739	0.207	4.51205
MSTRG.3140.6	MSTRG.3140	chr1:234527344-234614849	-	30	4842	4.40158	3.74693	2.64517	1.72071	4.64573	0.479837
MSTRG.3140.7	MSTRG.3140	chr1:234527344-234614849	-	28	4572	2.6195	2.58607	1.31353	1.42581	0.158052	0.624233
MSTRG.3140.8	MSTRG.3140	chr1:234527344-234614849	-	30	9276	4.42177	2.48586	2.8628	0.71456	0.628116	1.2133
MSTRG.3138.1	MSTRG.3138	chr1:234745672-234745925	+	1	254	0.046883	0.594014	0	0.828856	0.325357	1.20266
MSTRG.3139.1	MSTRG.3139	chr1:234745675-234745939	-	1	265	6.66966	2.94168	5.58165	4.17673	4.72191	4.61384
MSTRG.3141.1	MSTRG.3141	chr1:235187161-235191462	-	1	4302	0.251683	0.257734	0.342561	1.00996	0.927011	1.669
MSTRG.3142.1	MSTRG.3142	chr1:235272651-235291252	-	5	3354	4.8993	3.04361	1.16622	4.49544	5.30471	4.9619
MSTRG.3147.8	MSTRG.3147	chr1:235491905-235506453	+	4	3203	2.13289	1.32949	14.2272	17.8546	13.1858	13.3027
MSTRG.3147.9	MSTRG.3147	chr1:235491905-235506453	+	5	3027	0	0	0	0	0	4.50923
MSTRG.3147.7	MSTRG.3147	chr1:235491905-235507847	+	4	4699	4.80341	2.44301	0.246323	0.930705	2.84097	4.04464
MSTRG.3154.1	MSTRG.3154	chr1:235610559-235667781	-	13	2879	10.4044	10.6672	10.5469	9.12721	8.23344	8.12722
MSTRG.3154.3	MSTRG.3154	chr1:235617524-235620307	-	3	253	0.342498	0.26166	0.257591	1.45783	0	0.209729
MSTRG.3159.11	MSTRG.3159	chr1:235992105-236030176	-	4	558	3.3667	2.20978	3.16882	1.85362	1.94324	2.12823
MSTRG.3159.14	MSTRG.3159	chr1:236035303-236046916	-	2	1003	0.259757	0.835047	0.842846	2.01683	0.489504	1.23609
MSTRG.3155.1	MSTRG.3155	chr1:236072359-236081389	+	2	2509	0.416754	0.306304	0.423704	1.33599	1.62591	1.98859
MSTRG.3165.1	MSTRG.3165	chr1:236378855-236389795	-	6	3513	0.999864	1.66691	2.70811	4.75882	3.5909	4.59558
MSTRG.3170.8	MSTRG.3170	chr1:236681582-236711580	+	10	1179	0	2.25777	0.31308	0	0.419291	0
MSTRG.3172.2	MSTRG.3172	chr1:236699462-236701218	-	2	1601	0.730734	0.502454	0.966598	1.03184	0.984143	1.82644
MSTRG.3167.1	MSTRG.3167	chr1:237097939-237098209	-	1	271	0	0.269025	0.395821	4.38689	2.11881	4.05496
MSTRG.3178.3	MSTRG.3178	chr1:237634419-237664832	+	5	1550	1.60005	1.73649	1.97548	0.336856	0.728568	0.275196
MSTRG.3178.8	MSTRG.3178	chr1:237955157-237997115	+	13	2572	1.08615	2.60045	2.04091	0	1.44392	0.538044
MSTRG.3182.3	MSTRG.3182	chr1:241756904-241764480	-	4	1663	3.42071	0.263532	0.120492	0.17681	1.18449	0
MSTRG.3183.1	MSTRG.3183	chr1:241803481-241803718	+	1	238	0	0	1.22115	0.188896	0	0.190923
MSTRG.3185.4	MSTRG.3185	chr1:242011527-242052896	+	15	2975	5.73794	7.11148	3.82699	6.1488	2.71382	3.79739
MSTRG.3185.5	MSTRG.3185	chr1:242011527-242052896	+	15	2854	1.11073	0.527982	0.981524	0.918687	3.42268	1.48894
MSTRG.3185.3	MSTRG.3185	chr1:242011527-242053239	+	15	3321	0.533042	0.773707	0.6104	0.425936	2.07724	2.94036
MSTRG.3185.11	MSTRG.3185	chr1:242012253-242052896	+	15	2734	17.6184	15.1204	12.97	5.05484	3.02019	0.001934
MSTRG.3186.1	MSTRG.3186	chr1:242060064-242089860	+	6	3183	0.253806	0.413914	0.232242	0.567454	0.43528	1.31546
MSTRG.3188.4	MSTRG.3188	chr1:243287731-243349711	-	11	5840	4.37594	0.921463	4.87164	0.133189	1.15884	1.73215
MSTRG.3188.5	MSTRG.3188	chr1:243287731-243364116	-	16	6671	1.80914	0	0	0	0	0
MSTRG.3188.10	MSTRG.3188	chr1:243289224-243303376	-	6	712	1.57728	0.825593	1.88727	1.55816	1.13929	1.62712
MSTRG.3193.3	MSTRG.3193	chr1:243419358-243663391	+	17	2435	3.06629	1.32305	4.02176	1.64158	1.45958	1.96637
MSTRG.3193.9	MSTRG.3193	chr1:243456420-243663391	+	14	1969	1.42036	1.74996	1.11217	0.560914	0.559352	0.14032
MSTRG.3192.2	MSTRG.3192	chr1:244212760-244220774	+	2	7903	0.677651	0.612783	1.05909	1.40739	1.46465	2.94138
MSTRG.3192.3	MSTRG.3192	chr1:244212760-244220774	+	3	7316	0.457159	0.682869	0.32618	1.26071	0.506197	1.28842
MSTRG.3200.5	MSTRG.3200	chr1:244816428-244872331	+	6	4138	0.008404	2.25372	1.07397	4.14493	0.006028	2.9452
MSTRG.3200.3	MSTRG.3200	chr1:244816428-244872335	+	4	3923	3.46215	2.48161	4.63544	0.930739	9.34135	6.01427
MSTRG.3200.4	MSTRG.3200	chr1:244816428-244872335	+	6	4130	3.97312	1.99066	2.02994	0.659704	2.56905	3.43655
MSTRG.3215.1	MSTRG.3215	chr1:244998624-245008897	+	5	1176	2.35665	2.12835	2.05014	1.4579	1.25528	0.660479
MSTRG.3215.5	MSTRG.3215	chr1:244998961-245008868	+	5	884	0	0	0	4.08164	0	0
MSTRG.3217.1	MSTRG.3217	chr1:245017375-245020156	+	6	1239	0.858737	0.719255	0.98106	1.34855	1.80986	0.997913
MSTRG.3216.22	MSTRG.3216	chr1:245017508-245022676	-	9	2003	20.5533	37.381	31.146	13.1256	11.3938	17.6816
MSTRG.3218.1	MSTRG.3218	chr1:245022071-245027834	+	6	1358	1.98621	1.88165	1.33242	3.40423	3.54225	3.89302
MSTRG.3218.2	MSTRG.3218	chr1:245022071-245027834	+	6	1415	1.59981	2.43592	1.77352	1.39386	2.10455	1.37891
MSTRG.3213.1	MSTRG.3213	chr1:245251535-245254027	+	1	2493	3.14223	2.77979	3.39658	0.961866	0.625455	1.62181
MSTRG.3208.1	MSTRG.3208	chr1:245293863-245297071	+	1	3209	0.47679	0.345881	0.4582	0.37037	0.286986	1.12453
MSTRG.3220.6	MSTRG.3220	chr1:245912653-246670534	-	11	1403	5.12289	3.59199	3.40022	6.55335	6.07944	3.94401
MSTRG.3232.1	MSTRG.3232	chr1:246887700-246890203	-	2	225	0.629488	1.03423	0	0.779541	1.33837	0.621135
MSTRG.3234.7	MSTRG.3234	chr1:247002414-247095280	-	36	8903	9.4029	16.2248	6.83122	4.72342	15.3905	10.2369
MSTRG.3241.1	MSTRG.3241	chr1:247140167-247140662	-	1	496	1.44559	1.43673	0.313145	0.641499	0.32144	0.541589
MSTRG.3244.1	MSTRG.3244	chr1:247261338-247261620	-	1	283	1.92604	0.604913	2.39006	1.89681	2.59578	2.5616
MSTRG.3249.2	MSTRG.3249	chr1:247353154-247374158	-	5	1632	10.1115	9.22364	8.71888	8.74967	6.64923	13.8485
MSTRG.3249.3	MSTRG.3249	chr1:247361462-247374124	-	5	1487	4.33101	4.1418	3.86158	5.19215	4.52852	6.36558
MSTRG.3249.4	MSTRG.3249	chr1:247362701-247374116	-	3	2195	5.11283	5.32215	5.73767	4.34369	2.16248	8.38201
MSTRG.3255.1	MSTRG.3255	chr1:247460714-247495147	-	10	5296	0.49449	8.53854	8.82374	0.754406	0.657132	0.840837
MSTRG.3256.1	MSTRG.3256	chr1:247495148-247499042	+	2	3649	3.10389	2.42613	2.51067	0.277544	0.371353	0.439392
MSTRG.3253.1	MSTRG.3253	chr1:247506670-247507524	+	1	855	0.694062	0.610396	1.29811	0.081464	0.133814	0.46737
MSTRG.3254.1	MSTRG.3254	chr1:247508229-247508733	+	1	505	1.29621	0.890569	0.640846	0.031973	0.143189	0.101699
MSTRG.3270.1	MSTRG.3270	chr1:247857064-247858925	-	1	1862	0.861629	0.654169	0.933973	0.931013	0.548191	2.00715
MSTRG.3257.2	MSTRG.3257	chr1:248881950-248885502	-	2	1095	0.426932	1.26166	1.022	1.00018	1.64286	0.166447
MSTRG.3257.1	MSTRG.3257	chr1:248881950-248894439	-	4	1538	3.16777	1.70534	2.25633	2.19393	1.70194	2.43645
MSTRG.3277.8	MSTRG.3277	chr10:181009-199215	+	3	3055	4.15686	0	0	1.35675	1.24824	1.61058
MSTRG.3277.7	MSTRG.3277	chr10:181009-199243	+	3	3182	0	4.0265	3.27347	0	0	0
MSTRG.3288.3	MSTRG.3288	chr10:855482-977645	-	19	6094	3.31676	5.5538	5.96488	3.42719	4.39437	0.034085
MSTRG.3295.3	MSTRG.3295	chr10:1034351-1065808	+	17	4435	0	0	0	0.094266	2.91946	0
MSTRG.3295.2	MSTRG.3295	chr10:1034351-1068454	+	19	4422	0.001034	0	0	0	21.7993	0.001514
MSTRG.3295.4	MSTRG.3295	chr10:1034402-1065876	+	16	5111	1.8744	1.7175	14.8625	0.16076	0.008149	0.483356
MSTRG.3301.1	MSTRG.3301	chr10:1096193-1102652	-	2	4397	2.3597	2.42047	2.14407	0.733502	0.579492	1.1273
MSTRG.3300.2	MSTRG.3300	chr10:1102344-1178110	+	14	4515	1.5488	0	2.42561	1.5918	1.52894	0
MSTRG.3300.3	MSTRG.3300	chr10:1102344-1178110	+	14	4579	0.023166	1.91726	0	0.040938	0	0
MSTRG.3291.1	MSTRG.3291	chr10:1401728-1404145	+	2	1311	1.71302	1.81381	1.54606	0.967793	1.34443	0.631183
MSTRG.3306.3	MSTRG.3306	chr10:3109864-3178985	+	22	2705	0.054778	19.133	31.6177	20.1652	54.1309	18.3997
MSTRG.3307.1	MSTRG.3307	chr10:3160980-3172152	-	3	377	0.7576	1.3561	0.614493	0.169637	0.650381	0.166614
MSTRG.3302.1	MSTRG.3302	chr10:3509789-3510107	+	1	319	0.819555	0.42386	0.19751	0.960718	1.04908	0.81995
MSTRG.3303.1	MSTRG.3303	chr10:3597385-3668457	-	3	2507	1.46314	1.52781	0.888458	1.87204	1.47915	1.65895
MSTRG.3303.2	MSTRG.3303	chr10:3597385-3668457	-	4	2698	1.72511	1.41599	1.11254	1.34081	1.89983	1.55367
MSTRG.3309.1	MSTRG.3309	chr10:5003430-5025475	+	10	6742	0	0	0	0	1.01813	0
MSTRG.3309.6	MSTRG.3309	chr10:5005641-5012133	+	7	920	0	0	0	0.693388	0.781082	2.4396
MSTRG.3309.5	MSTRG.3309	chr10:5005641-5014939	+	7	853	0	0	0	1.01101	5.05649	2.00653
MSTRG.3309.4	MSTRG.3309	chr10:5005641-5020142	+	10	1263	0	0	0	69.5336	0	0
MSTRG.3309.9	MSTRG.3309	chr10:5006373-5014939	+	7	1018	0	0.056625	0	1.03128	0.088231	0.166001
MSTRG.3311.1	MSTRG.3311	chr10:5008215-5011110	-	4	351	0	0	0	1.29955	1.05728	0.39819
MSTRG.3312.1	MSTRG.3312	chr10:5029592-5049699	-	10	3848	0.172033	0.267431	0.109484	1.13477	0.000203	0.190738
MSTRG.3312.6	MSTRG.3312	chr10:5032091-5049699	-	9	1181	0	0	0	1.77204	0.521423	9.08351
MSTRG.3318.1	MSTRG.3318	chr10:5140992-5147816	-	5	509	0.039701	0	0.095165	0.600546	1.23764	0.485871
MSTRG.3319.1	MSTRG.3319	chr10:5636954-5639135	-	4	896	0	1.34379	0.934671	0.975037	1.15297	0.949928
MSTRG.3323.10	MSTRG.3323	chr10:5726928-5805703	+	24	8822	1.61714	0.033576	1.63845	1.39163	1.8839	2.02675
MSTRG.3323.11	MSTRG.3323	chr10:5726928-5805703	+	24	8852	2.92546	4.70768	1.88499	2.73318	2.77717	2.81338
MSTRG.3323.12	MSTRG.3323	chr10:5726928-5805703	+	22	8572	2.15766	4.31223	2.33963	2.78255	2.06503	2.66218
MSTRG.3323.6	MSTRG.3323	chr10:5726928-5805703	+	22	8618	1.49985	0	2.59904	0	0	0
MSTRG.3323.7	MSTRG.3323	chr10:5726928-5805703	+	25	9065	2.06693	0	2.05347	2.64413	2.03426	2.66285
MSTRG.3323.8	MSTRG.3323	chr10:5726928-5805703	+	23	8710	2.86159	3.48877	1.39425	2.98583	2.05141	2.70179
MSTRG.3325.1	MSTRG.3325	chr10:5805647-5807062	-	1	1416	1.69035	1.23561	1.07843	0.613749	0.413353	0.487015
MSTRG.3332.1	MSTRG.3332	chr10:6146967-6154318	-	5	537	0	0.682607	0	0.282194	1.16219	0.436598
MSTRG.3334.15	MSTRG.3334	chr10:6263367-6277488	+	6	3118	0.743694	0.165126	0	7.10983	7.96483	9.11925
MSTRG.3343.1	MSTRG.3343	chr10:6912226-6913674	+	1	1449	0.817461	0.703256	1.12508	0.032556	0	0.118322
MSTRG.3344.3	MSTRG.3344	chr10:7200603-7452920	-	21	7772	2.38176	1.7943	1.82722	1.63322	0	0.048077
MSTRG.3350.4	MSTRG.3350	chr10:7797798-7829944	-	12	1380	3.23105	3.0195	2.42599	3.49256	0	3.06171
MSTRG.3349.1	MSTRG.3349	chr10:8007474-8019250	-	2	279	1.3684	1.10307	0.438443	0.415893	2.36124	1.92154
MSTRG.3352.5	MSTRG.3352	chr10:10826406-10836877	-	4	709	5.66647	7.15198	8.40361	14.7645	11.2638	11.2618
MSTRG.3356.5	MSTRG.3356	chr10:11891296-11912874	+	4	2770	0.414544	0.737528	0.628823	2.22259	2.13403	1.94522
MSTRG.3358.1	MSTRG.3358	chr10:11911688-11911999	-	1	312	0.163078	0.232494	0.822388	0.427715	1.21255	0.498112
MSTRG.3359.1	MSTRG.3359	chr10:11914987-11916500	+	1	1514	1.08292	1.17531	1.25263	0.418544	0.260692	0.478694
MSTRG.3362.1	MSTRG.3362	chr10:12071336-12077434	+	2	565	0.830601	0.872	1.75565	1.45776	1.44301	0.890747
MSTRG.3371.8	MSTRG.3371	chr10:12171701-12206546	+	11	1456	1.02567	0.69407	1.09074	2.06293	0	1.11381
MSTRG.3366.1	MSTRG.3366	chr10:12391520-12391788	-	1	269	0	0.287636	0	0.174189	0	1.43653
MSTRG.3380.10	MSTRG.3380	chr10:13142225-13165198	+	10	1512	5.27786	4.08199	4.56397	7.96306	5.91982	6.36337
MSTRG.3380.9	MSTRG.3380	chr10:13142225-13200472	+	16	2081	0	0	8.51861	8.64278	0.007024	6.78286
MSTRG.3386.4	MSTRG.3386	chr10:13206128-13253104	+	20	4269	1.7695	0	0.152666	0.090455	0	0.137308
MSTRG.3388.3	MSTRG.3388	chr10:13360080-13389358	-	9	2401	22.2121	21.8021	19.8866	18.0047	18.953	18.3533
MSTRG.3388.6	MSTRG.3388	chr10:13375901-13390200	-	6	973	1.64336	2.02281	0.762584	1.25133	2.11687	1.49929
MSTRG.3394.3	MSTRG.3394	chr10:13628968-13672868	+	10	1656	1.01544	1.20219	2.79756	2.878	3.32182	3.59448
MSTRG.3409.1	MSTRG.3409	chr10:14906510-14920685	-	3	2298	1.48455	1.0592	0.848139	0.081079	0.050168	0.159673
MSTRG.3410.7	MSTRG.3410	chr10:14921207-14939509	+	3	1104	1.47048	0.071137	0.332057	0.135712	0	0.900888
MSTRG.3412.1	MSTRG.3412	chr10:14950278-14955716	+	1	5439	1.13474	1.10983	1.11749	0.814464	0.517818	1.27194
MSTRG.3393.1	MSTRG.3393	chr10:15117475-15130775	-	6	3748	3.78049	2.7046	3.08104	3.12482	3.17855	3.86003
MSTRG.3420.3	MSTRG.3420	chr10:16478983-16555736	+	7	3856	3.89775	2.95161	4.32499	0	0.751595	1.2769
MSTRG.3420.4	MSTRG.3420	chr10:16478983-16555736	+	5	3297	1.46471	1.43486	0.38313	0	0	0
MSTRG.3420.5	MSTRG.3420	chr10:16478983-16555736	+	6	3722	1.33838	0.991055	0.910533	1.0742	0	0
MSTRG.3420.7	MSTRG.3420	chr10:16525892-16555736	+	5	3636	0.607384	1.57811	0.51939	0.274471	0.349022	0.00105
MSTRG.3423.1	MSTRG.3423	chr10:16557479-16559858	+	1	2380	1.36374	1.12201	1.0351	0.443773	0.1715	0.468482
MSTRG.3426.2	MSTRG.3426	chr10:17256327-17266223	-	3	1267	2.16994	0	0	1.93996	0	0.024383
MSTRG.3426.3	MSTRG.3426	chr10:17256331-17258865	-	3	1176	0	1.87062	0.013746	0	0	0.013398
MSTRG.3426.4	MSTRG.3426	chr10:17257195-17279592	-	11	2078	0.793781	0.599005	0.803927	1.4099	0.032172	0.106946
MSTRG.3426.6	MSTRG.3426	chr10:17270612-17278338	-	9	1530	1.1234	2.32203	2.11322	0	2.10463	1.57997
MSTRG.3438.1	MSTRG.3438	chr10:18801544-18944123	-	14	3587	0.296092	0.674245	0.966744	0.658087	0.442589	1.5543
MSTRG.3440.1	MSTRG.3440	chr10:18948334-18970566	+	5	7110	4.52258	4.20159	4.98878	0.408981	0.48918	1.58174
MSTRG.3435.1	MSTRG.3435	chr10:20408816-20409111	-	1	296	0.115327	0.060015	0.084248	0.325796	0.465305	1.27439
MSTRG.3445.2	MSTRG.3445	chr10:21068905-21581983	-	7	6740	1.3355	1.29949	0.011299	0.455978	1.00277	0.751842
MSTRG.3458.1	MSTRG.3458	chr10:21802144-21806848	-	3	4435	0	1.79981	0.136424	6.62766	2.45667	0
MSTRG.3458.2	MSTRG.3458	chr10:21802212-21806848	-	2	4364	0	0	0	0	6.23831	0
MSTRG.3458.4	MSTRG.3458	chr10:21802417-21807190	-	2	4498	0	0	0	0	0	4.21558
MSTRG.3459.7	MSTRG.3459	chr10:21823397-21846108	+	4	804	1.502	0.669375	1.41744	2.47052	2.97152	4.045
MSTRG.3459.6	MSTRG.3459	chr10:21823397-22032555	+	22	4870	2.97865	1.96377	1.55805	2.04034	3.20689	1.19426
MSTRG.3459.8	MSTRG.3459	chr10:21823397-22032555	+	23	4877	6.83307	1.71111	0.919019	2.14627	1.53304	0.687506
MSTRG.3465.2	MSTRG.3465	chr10:22823787-23003484	-	9	3640	0.554985	3.61151	3.77126	6.40477	2.15367	2.35499
MSTRG.3464.1	MSTRG.3464	chr10:23427276-23427535	+	1	260	0.883396	0.729102	1.17688	1.61547	1.01989	1.35628
MSTRG.3468.1	MSTRG.3468	chr10:23727992-23731090	+	2	3027	0.097774	11.9882	0.147552	28.8103	0	0
MSTRG.3470.14	MSTRG.3470	chr10:24755460-24836598	+	14	4809	2.52516	2.52849	1.67617	2.89457	3.70223	4.47364
MSTRG.3470.12	MSTRG.3470	chr10:24755460-24836772	+	16	6660	0.660577	0.536796	1.69057	1.32697	0.813205	0.986683
MSTRG.3470.13	MSTRG.3470	chr10:24755460-24836772	+	16	6657	0.698818	0.585804	0.456877	1.35945	0.828376	1.00075
MSTRG.3481.5	MSTRG.3481	chr10:24873316-25010856	-	24	5900	13.0311	1.78316	7.64841	8.02899	2.19891	9.55055
MSTRG.3487.11	MSTRG.3487	chr10:27035528-27112219	-	8	3183	12.7668	13.6255	12.0355	11.9672	10.0223	11.2462
MSTRG.3487.12	MSTRG.3487	chr10:27035528-27112219	-	7	3006	4.64282	2.40849	3.17704	7.40651	10.8654	6.67953
MSTRG.3493.1	MSTRG.3493	chr10:27443109-27443313	+	1	205	0.866928	1.3465	0.943435	0.25328	1.39953	1.29455
MSTRG.3494.4	MSTRG.3494	chr10:27452056-27475647	+	2	1948	0.873478	0.747894	0.574277	0.559441	0.193399	1.36344
MSTRG.3494.5	MSTRG.3494	chr10:27452056-27475647	+	3	1847	0	0	0	0.666107	1.12655	1.23461
MSTRG.3495.3	MSTRG.3495	chr10:27484146-27529744	-	13	3908	4.74863	5.91123	0.872956	0.602333	0.223044	1.24032
MSTRG.3498.1	MSTRG.3498	chr10:27754583-27759814	+	2	3240	0	0	0	5.88344	5.66176	7.31534
MSTRG.3502.3	MSTRG.3502	chr10:28339957-28492161	-	16	5071	0	2.70104	2.08074	0.898729	3.52685	3.24297
MSTRG.3502.4	MSTRG.3502	chr10:28340069-28591995	-	17	4993	0	0.011351	0	2.24779	0.023188	0.028678
MSTRG.3511.1	MSTRG.3511	chr10:28781189-28811050	-	2	1003	0.934872	0.814789	1.05853	0.73271	0.682802	0.963845
MSTRG.3512.1	MSTRG.3512	chr10:28811336-28821936	-	3	2795	1.20059	0.968722	2.17516	0.766782	0.126771	1.73279
MSTRG.3512.2	MSTRG.3512	chr10:28811350-28814817	-	2	922	0	0	0.091454	0	4.49976	0.042346
MSTRG.3512.4	MSTRG.3512	chr10:28811614-28821672	-	2	3626	5.5538	3.62636	3.43154	2.1099	0.561125	1.98381
MSTRG.3513.5	MSTRG.3513	chr10:28821713-28908889	+	13	2172	26.9917	22.5498	19.5259	19.1977	16.9313	16.3622
MSTRG.3514.1	MSTRG.3514	chr10:28822018-28872434	-	4	872	0.932549	1.128	1.10877	1.2733	0.661836	0.982857
MSTRG.3513.7	MSTRG.3513	chr10:28822242-28908889	+	15	2807	2.88358	2.39987	3.20714	3.66728	2.66299	3.27331
MSTRG.3513.13	MSTRG.3513	chr10:28822526-28908889	+	13	1969	24.7103	22.9848	23.4232	19.1449	22.6746	20.6041
MSTRG.3506.1	MSTRG.3506	chr10:29217760-29222962	+	3	680	1.25052	0.518993	1.34595	1.01463	1.47241	0.619656
MSTRG.3507.1	MSTRG.3507	chr10:29431600-29432016	+	1	417	0.064902	0.129885	0	0.467308	1.0769	0.444112
MSTRG.3519.1	MSTRG.3519	chr10:29712209-29716628	+	1	4420	1.83831	1.49691	1.86186	0.779109	0.680743	1.27964
MSTRG.3521.1	MSTRG.3521	chr10:29747851-29750412	+	1	2562	1.22277	0.89092	1.14725	0.747879	0.56275	0.585362
MSTRG.3526.1	MSTRG.3526	chr10:29987155-29987479	+	1	325	24.6756	27.9553	22.3674	25.1109	34.8838	28.9141
MSTRG.3515.1	MSTRG.3515	chr10:30597952-30638248	-	10	5977	3.70195	0	0.08075	0.011684	0.012006	0.014467
MSTRG.3529.3	MSTRG.3529	chr10:30973712-30978432	+	4	467	0	0	0	1.21047	0	0
MSTRG.3538.1	MSTRG.3538	chr10:31815953-31816203	-	1	251	1.12569	0.253547	0.313248	0.170283	0	0.733264
MSTRG.3545.4	MSTRG.3545	chr10:32560482-32667726	-	14	2593	1.01772	0.830607	0	1.38942	0	0.102455
MSTRG.3553.2	MSTRG.3553	chr10:33269799-33371030	+	4	1203	0	0	2.40437	0.018291	0.037912	0.015984
MSTRG.3561.16	MSTRG.3561	chr10:34601192-35104244	-	19	3337	4.78302	3.83968	1.83109	5.19656	1.45986	5.68009
MSTRG.3561.13	MSTRG.3561	chr10:34601192-35104249	-	20	3471	0.387062	0.328231	1.58853	0.350986	2.0565	0.352325
MSTRG.3561.14	MSTRG.3561	chr10:34601192-35104249	-	19	3339	0.411721	0.334229	1.24467	0.36943	1.67352	0.375718
[truncated: 13,617 more rows]
